# Supplementary material for: Identification and expression profile of the soil moisture and Ralstonia solanacearum response CYPome in ginger (Zingiber officinale)
Source: PeerJ. 2021 Aug 2;9:e11755. doi: 10.7717/peerj.11755 (PMC8340902; doi:10.7717/peerj.11755)
Supplement: Supplemental Information 1 [file peerj-09-11755-s001.xlsx]

## Sheet: Sheet1
Table S1 Annotation and expression levels of P450 unigenes
SeqID	Groups	Length	Count												Normalized expression level												Average expression levels				NR-ID	NR-description	KEGG-ID	KEGG-description	KOG-ID	KOG-description	SwissProt-ID	SwissProt-description	GO-ID	Subfamily	Family
			LI-1A	LI-2A	LI-3A	HI-1A	HI-2A	HI-3A	LUN-1A	LUN-2A	LUN-3A	HUN-1A	HUN-2A	HUN-3A	LI-1A_CPM	LI-2A_CPM	LI-3A_CPM	HI-1A_CPM	HI-2A_CPM	HI-3A_CPM	LUN-1A_CPM	LUN-2A_CPM	LUN-3A_CPM	HUN-1A_CPM	HUN-2A_CPM	HUN-3A_CPM	LI	HI	LUN	HUN
Zoff000755	C	456	0	0	0	0	0	0	0	3	0	0	0	0	0	0	0	0	0	0	0	0.15	0	0	0	0	0	0	0.05	0	gi|443913571|gb|ELU36163.1|	P450 family fatty acid hydroxylase [Rhizoctonia solani AG-1 IA]	mpr:MPER_00653	hypothetical protein	7297764	[C] KOG1158 NADP/FAD dependent oxidoreductase	sp|Q9Y8G7|C505_FUSOX	Bifunctional P-450:NADPH-P450 reductase OS=Fusarium oxysporum GN=CYP505 PE=1 SV=1	GO:0003958 ;GO:0005506 ;GO:0010181 ;GO:0020037 ;GO:0008270 ;GO:0070330 ;GO:0055114	CYP505	CYP505
Zoff002502	B	581	0	0	0	0	0	0	0	0	0	3	0	0	0	0	0	0	0	0	0	0	0	0.15	0	0	0	0	0	0.05	gi|342885094|gb|EGU85203.1|	hypothetical protein FOXB_04318 [Fusarium oxysporum Fo5176]	fgr:FG04249.1	hypothetical protein	--	--	sp|Q6UEG2|AFLN_ASPPA	P450 monooxygenase AflN OS=Aspergillus parasiticus GN=aflN PE=3 SV=1	GO:0020037 ;GO:0016705 ;GO:0004497 ;GO:0005506 ;GO:0055114	CYP	CYP
Zoff002808	A	573	4	0	0	0	0	0	0	0	0	0	0	0	0.2	0	0	0	0	0	0	0	0	0	0	0	0.0666667	0	0	0	gi|675389477|gb|KFM82374.1|	Cytochrome P450 2J6, partial [Stegodyphus mimosarum]	isc:IscW_ISCW005196	cytochrome P450, putative (EC:1.14.14.1)	Hs18491008	[Q] KOG0156 Cytochrome P450 CYP2 subfamily	sp|P12938|CP2D3_RAT	Cytochrome P450 2D3 OS=Rattus norvegicus GN=Cyp2d3 PE=2 SV=2	GO:0016491	CYP2J	CYP2
Zoff003067	D	386	0	2	0	0	0	0	0	0	0	0	0	0	0	0.11	0	0	0	0	0	0	0	0	0	0	0.0366667	0	0	0	gi|656912728|gb|KEF58310.1|	hypothetical protein A1O9_06236 [Exophiala aquamarina CBS 119918]	cpw:CPC735_051890	Cytochrome P450 family protein	--	--	--	--	GO:0016491 ;GO:0005488	CYP	CYP
Zoff003430	A	639	2	1	0	2	0	1	0	0	0	0	0	0	0.1	0.06	0	0.1	0	0.05	0	0	0	0	0	0	0.0533333	0.05	0	0	gi|660969790|gb|KEP53649.1|	cytochrome P450 family protein [Rhizoctonia solani 123E]	scm:SCHCODRAFT_46615	hypothetical protein	At2g46950	[QI] KOG0157 Cytochrome P450 CYP4/CYP19/CYP26 subfamilies	sp|Q9ZW95|C7352_ARATH	Cytokinin hydroxylase OS=Arabidopsis thaliana GN=CYP735A2 PE=1 SV=1	GO:0020037 ;GO:0016705 ;GO:0004497 ;GO:0005506 ;GO:0055114	CYP735A	CYP735
Zoff006486	C	760	0	0	0	4	0	0	0	0	0	0	0	0	0	0	0	0.2	0	0	0	0	0	0	0	0	0	0.0666667	0	0	gi|576988716|gb|EUC61440.1|	lanosterol 14-alpha-demethylase [Rhizoctonia solani AG-3 Rhs1AP]	cci:CC1G_07605	lanosterol 14-alpha-demethylase; K05917 cytochrome P450, family 51 (sterol 14-demethylase) [EC:1.14.13.70]	YHR007c	[Q] KOG0684 Cytochrome P450	sp|P49602|CP51_USTMA	Lanosterol 14-alpha demethylase OS=Ustilago maydis (strain 521 / FGSC 9021) GN=ERG11 PE=3 SV=1	GO:0020037 ;GO:0016705 ;GO:0004497 ;GO:0005506 ;GO:0032259 ;GO:0055114 ;GO:0008168	CYP51A	CYP51
Zoff007693	D	400	0	0	0	0	0	1	1	0	3	0	0	0	0	0	0	0	0	0.05	0.05	0	0.15	0	0	0	0	0.0166667	0.0666667	0	gi|628323040|ref|XP_007742831.1|	hypothetical protein A1O5_04032 [Cladophialophora psammophila CBS 110553]	pno:SNOG_07598	hypothetical protein	Hs4503213	[Q] KOG0159 Cytochrome P450 CYP11/CYP12/CYP24/CYP27 subfamilies	sp|O13317|TRI11_FUSSP	Isotrichodermin C-15 hydroxylase OS=Fusarium sporotrichioides GN=TRI11 PE=3 SV=1	GO:0046872 ;GO:0016491	CYP10	CYP10
Zoff008317	B	633	6	0	2	0	0	0	0	0	0	0	0	0	0.3	0	0.1	0	0	0	0	0	0	0	0	0	0.133333	0	0	0	gi|576993596|gb|EUC66262.1|	cytochrome P450 family protein, partial [Rhizoctonia solani AG-3 Rhs1AP]	afv:AFLA_073130	cytochrome P450 oxidoreductase OrdA-like, putative	At5g07990	[Q] KOG0156 Cytochrome P450 CYP2 subfamily	sp|B8NHY4|ORDA_ASPFN	O-methylsterigmatocystin oxidoreductase OS=Aspergillus flavus (strain ATCC 200026 / FGSC A1120 / NRRL 3357 / JCM 12722 / SRRC 167) GN=ordA PE=2 SV=1	--	CYP	CYP
Zoff009547	C	409	0	0	0	1	0	0	0	0	0	1	0	0	0	0	0	0.05	0	0	0	0	0	0.05	0	0	0	0.0166667	0	0.0166667	gi|531864327|gb|EQL01406.1|	cytochrome P450 52A12 [Ophiocordyceps sinensis CO18]	afm:AFUA_2G09540	cytochrome P450 family protein (EC:1.14.14.-); K00495 [EC:1.14.14.-]	At2g45510	[QI] KOG0157 Cytochrome P450 CYP4/CYP19/CYP26 subfamilies	sp|Q9Y758|CP52M_DEBHN	Cytochrome P450 52A13 OS=Debaryomyces hansenii GN=CYP52A13 PE=2 SV=1	GO:0020037 ;GO:0016712 ;GO:0005506 ;GO:0055114	CYP52A	CYP52
Zoff009548	C	468	0	0	0	0	0	0	0	0	0	0	0	0	0	0	0	0	0	0	0	0	0	0	0	0	0	0	0	0	gi|531864327|gb|EQL01406.1|	cytochrome P450 52A12 [Ophiocordyceps sinensis CO18]	afm:AFUA_2G09540	cytochrome P450 family protein (EC:1.14.14.-); K00495 [EC:1.14.14.-]	At2g45510	[QI] KOG0157 Cytochrome P450 CYP4/CYP19/CYP26 subfamilies	sp|Q9Y758|CP52M_DEBHN	Cytochrome P450 52A13 OS=Debaryomyces hansenii GN=CYP52A13 PE=2 SV=1	GO:0020037 ;GO:0016712 ;GO:0005506 ;GO:0055114	CYP52A	CYP52
Zoff009549	C	429	0	0	0	0	1	0	0	0	0	0	0	0	0	0	0	0	0.05	0	0	0	0	0	0	0	0	0.0166667	0	0	gi|531864327|gb|EQL01406.1|	cytochrome P450 52A12 [Ophiocordyceps sinensis CO18]	pcs:Pc22g19240	Pc22g19240	At2g45510	[QI] KOG0157 Cytochrome P450 CYP4/CYP19/CYP26 subfamilies	sp|Q9Y758|CP52M_DEBHN	Cytochrome P450 52A13 OS=Debaryomyces hansenii GN=CYP52A13 PE=2 SV=1	GO:0020037 ;GO:0016712 ;GO:0005506 ;GO:0055114	CYP52A	CYP52
Zoff009589	A	517	2	0	2	0	0	0	0	0	0	0	0	0	0.1	0	0.1	0	0	0	0	0	0	0	0	0	0.0666667	0	0	0	gi|639568746|gb|KDN46184.1|	hypothetical protein RSAG8_04411, partial [Rhizoctonia solani AG-8 WAC10335]	cci:CC1G_06814	cytochrome-450 hydroxylase	At1g24540	[QI] KOG0157 Cytochrome P450 CYP4/CYP19/CYP26 subfamilies	sp|P10611|CP4A4_RABIT	Cytochrome P450 4A4 OS=Oryctolagus cuniculus GN=CYP4A4 PE=1 SV=3	GO:0020037 ;GO:0016705 ;GO:0004497 ;GO:0005506 ;GO:0055114	CYP3A	CYP3
Zoff009590	A	921	6	1	1	1	0	0	0	0	0	0	0	0	0.3	0.06	0.05	0.05	0	0	0	0	0	0	0	0	0.136667	0.0166667	0	0	gi|639568746|gb|KDN46184.1|	hypothetical protein RSAG8_04411, partial [Rhizoctonia solani AG-8 WAC10335]	cci:CC1G_06814	cytochrome-450 hydroxylase	At3g14620	[QI] KOG0157 Cytochrome P450 CYP4/CYP19/CYP26 subfamilies	sp|H1A988|C7254_GLYUR	11-oxo-beta-amyrin 30-oxidase OS=Glycyrrhiza uralensis GN=CYP72A154 PE=1 SV=1	GO:0046872 ;GO:0016491	CYP72A	CYP72
Zoff012446	D	471	0	0	0	0	0	0	0	0	0	3	0	0	0	0	0	0	0	0	0	0	0	0.15	0	0	0	0	0	0.05	gi|590038860|gb|EXK40718.1|	hypothetical protein FOMG_07470 [Fusarium oxysporum f. sp. melonis 26406]	fgr:FG02419.1	hypothetical protein	CE15823	[Q] KOG0158 Cytochrome P450 CYP3/CYP5/CYP6/CYP9 subfamilies	sp|P38364|PID6_FUSSO	Pisatin demethylase OS=Fusarium solani subsp. pisi GN=PDA6-1 PE=3 SV=1	GO:0020037 ;GO:0016705 ;GO:0004497 ;GO:0005506 ;GO:0032259 ;GO:0055114 ;GO:0008168	CYP	CYP
Zoff013371	D	719	1	0	5	0	1	0	0	0	0	0	0	0	0.05	0	0.25	0	0.05	0	0	0	0	0	0	0	0.1	0.0166667	0	0	gi|628308035|ref|XP_007734985.1|	hypothetical protein A1O3_06677 [Capronia epimyces CBS 606.96]	act:ACLA_073680	benzoate 4-monooxygenase cytochrome P450	At5g25180	[Q] KOG0156 Cytochrome P450 CYP2 subfamily	sp|O13317|TRI11_FUSSP	Isotrichodermin C-15 hydroxylase OS=Fusarium sporotrichioides GN=TRI11 PE=3 SV=1	GO:0003824	CYP	CYP
Zoff013919	A	1096	2	0	0	3	0	3	0	3	0	0	0	0	0.1	0	0	0.15	0	0.15	0	0.15	0	0	0	0	0.0333333	0.1	0.05	0	gi|656915235|gb|KEF60814.1|	hypothetical protein A1O9_02376 [Exophiala aquamarina CBS 119918]	pno:SNOG_00214	hypothetical protein	At4g37410	[Q] KOG0156 Cytochrome P450 CYP2 subfamily	sp|B8NHY4|ORDA_ASPFN	O-methylsterigmatocystin oxidoreductase OS=Aspergillus flavus (strain ATCC 200026 / FGSC A1120 / NRRL 3357 / JCM 12722 / SRRC 167) GN=ordA PE=2 SV=1	GO:0020037 ;GO:0016705 ;GO:0004497 ;GO:0005506 ;GO:0055114	CYP	CYP
Zoff013920	A	1097	0	0	0	0	6	0	0	0	0	0	0	1	0	0	0	0	0.31	0	0	0	0	0	0	0.05	0	0.103333	0	0.0166667	gi|656915235|gb|KEF60814.1|	hypothetical protein A1O9_02376 [Exophiala aquamarina CBS 119918]	ncr:NCU07092	hypothetical protein	At4g37410	[Q] KOG0156 Cytochrome P450 CYP2 subfamily	sp|B8NHY4|ORDA_ASPFN	O-methylsterigmatocystin oxidoreductase OS=Aspergillus flavus (strain ATCC 200026 / FGSC A1120 / NRRL 3357 / JCM 12722 / SRRC 167) GN=ordA PE=2 SV=1	GO:0020037 ;GO:0016705 ;GO:0004497 ;GO:0005506 ;GO:0055114	CYP	CYP
Zoff014223	B	659	1	0	0	0	0	2	0	0	0	0	1	2	0.05	0	0	0	0	0.1	0	0	0	0	0.05	0.1	0.0166667	0.0333333	0	0.05	gi|731699905|ref|XP_010700096.1|	cytochrome p450-like protein [Leishmania panamensis]	tbr:Tb927.3.680	cytochrome P450 (EC:1.14.-.-); K00517 [EC:1.14.-.-]	At4g15110	[QI] KOG0157 Cytochrome P450 CYP4/CYP19/CYP26 subfamilies	sp|O48921|C97B2_SOYBN	Cytochrome P450 97B2, chloroplastic OS=Glycine max GN=CYP97B2 PE=2 SV=1	--	CYP97B	CYP97
Zoff014969	D	1792	0	1	0	34	10	0	0	0	1	3	0	0	0	0.06	0	1.72	0.52	0	0	0	0.05	0.15	0	0	0.02	0.746667	0.0166667	0.05	gi|477513544|gb|ENH66031.1|	Isotrichodermin C-15 hydroxylase [Fusarium oxysporum f. sp. cubense race 1]	fgr:FG08023.1	hypothetical protein	CE01659	[Q] KOG0158 Cytochrome P450 CYP3/CYP5/CYP6/CYP9 subfamilies	sp|Q12609|STCF_EMENI	Probable sterigmatocystin biosynthesis P450 monooxygenase stcF OS=Emericella nidulans (strain FGSC A4 / ATCC 38163 / CBS 112.46 / NRRL 194 / M139) GN=stcF PE=3 SV=3	GO:0046872 ;GO:0016491	CYP60A	CYP60
Zoff016467	C	1127	9	0	0	0	1	0	0	1	1	1	0	0	0.44	0	0	0	0.05	0	0	0.05	0.05	0.05	0	0	0.146667	0.0166667	0.0333333	0.0166667	gi|586734650|gb|EAR99512.2|	cytochrome P450 family monooxygenase [Tetrahymena thermophila SB210]	tet:TTHERM_00395750	Cytochrome P450 family protein (EC:1.14.14.1)	CE16163	[QI] KOG0157 Cytochrome P450 CYP4/CYP19/CYP26 subfamilies	sp|H2DH21|C7A29_PANGI	Cytochrome P450 CYP72A219 OS=Panax ginseng PE=2 SV=1	--	CYP72A	CYP72
Zoff016468	C	784	0	0	0	0	0	0	0	0	0	0	0	0	0	0	0	0	0	0	0	0	0	0	0	0	0	0	0	0	gi|586734650|gb|EAR99512.2|	cytochrome P450 family monooxygenase [Tetrahymena thermophila SB210]	tet:TTHERM_00395750	Cytochrome P450 family protein (EC:1.14.14.1)	--	--	sp|H2DH21|C7A29_PANGI	Cytochrome P450 CYP72A219 OS=Panax ginseng PE=2 SV=1	--	CYP72A	CYP72
Zoff017841	C	380	0	0	0	0	0	0	0	0	0	0	3	0	0	0	0	0	0	0	0	0	0	0	0.15	0	0	0	0	0.05	gi|672176627|ref|XP_008808383.1|	PREDICTED: phenylalanine N-monooxygenase-like [Phoenix dactylifera]	vvi:100263812	hypothetical protein LOC100263812	At5g05260	[Q] KOG0156 Cytochrome P450 CYP2 subfamily	sp|Q9FLC8|C79A2_ARATH	Phenylalanine N-monooxygenase OS=Arabidopsis thaliana GN=CYP79A2 PE=1 SV=1	GO:0046872 ;GO:0016491	CYP79A	CYP79
Zoff017854	D	399	5	1	0	3	4	1	6	4	10	9	0	2	0.25	0.06	0	0.15	0.21	0.05	0.3	0.2	0.49	0.46	0	0.1	0.103333	0.136667	0.33	0.186667	gi|313760499|dbj|BAJ41268.1|	NADPH-P450 reductase 1 [Zingiber officinale]	osa:4347838	Os09g0558900; K00327 NADPH-ferrihemoprotein reductase [EC:1.6.2.4]	At4g30210	[C] KOG1158 NADP/FAD dependent oxidoreductase	sp|Q9SUM3|NCPR2_ARATH	NADPH--cytochrome P450 reductase 2 OS=Arabidopsis thaliana GN=ATR2 PE=1 SV=1	--	CYP	CYP
Zoff018325	A	1883	1	2	0	9	20	14	0	2	0	0	0	0	0.05	0.11	0	0.46	1.03	0.69	0	0.1	0	0	0	0	0.0533333	0.726667	0.0333333	0	gi|682341475|gb|KFY36094.1|	hypothetical protein V494_05319 [Pseudogymnoascus pannorum VKM F-4513 (FW-928)]	aor:AOR_1_1174054	AO090011000685; toxin biosynthesis cytochrome P450 monooxygenase	Hs4503233	[Q] KOG0158 Cytochrome P450 CYP3/CYP5/CYP6/CYP9 subfamilies	sp|O13317|TRI11_FUSSP	Isotrichodermin C-15 hydroxylase OS=Fusarium sporotrichioides GN=TRI11 PE=3 SV=1	GO:0016491 ;GO:0005488	CYP	CYP
Zoff019958	D	689	0	0	11	0	0	0	0	0	0	0	0	1	0	0	0.55	0	0	0	0	0	0	0	0	0.05	0.183333	0	0	0.0166667	gi|628321241|ref|XP_007742521.1|	hypothetical protein A1O5_03720 [Cladophialophora psammophila CBS 110553]	pno:SNOG_10960	hypothetical protein	At3g20950	[Q] KOG0156 Cytochrome P450 CYP2 subfamily	sp|P38364|PID6_FUSSO	Pisatin demethylase OS=Fusarium solani subsp. pisi GN=PDA6-1 PE=3 SV=1	GO:0046872 ;GO:0008152 ;GO:0016491	CYP	CYP
Zoff020741	C	347	6	2	3	70.49	6.6	77.69	3	5	4	26	1	8.44	0.3	0.11	0.15	3.58	0.34	3.84	0.15	0.25	0.2	1.31	0.05	0.43	0.186667	2.58667	0.2	0.596667	gi|695080662|ref|XP_009387808.1|	PREDICTED: trans-cinnamate 4-monooxygenase-like [Musa acuminata subsp. malaccensis]	sbi:SORBI_04g017460	hypothetical protein; K00487 trans-cinnamate 4-monooxygenase [EC:1.14.13.11]	At2g30490	[Q] KOG0156 Cytochrome P450 CYP2 subfamily	sp|H2DH22|C7A10_PANGI	Cytochrome P450 CYP73A100 OS=Panax ginseng PE=2 SV=1	GO:0016023 ;GO:0004497 ;GO:0005506 ;GO:0020037 ;GO:0016705 ;GO:0055114	CYP73A	CYP73
Zoff020742	C	347	4	0	0	72.51	4.4	106.31	5	5	2	54	4	10.56	0.2	0	0	3.68	0.23	5.26	0.25	0.25	0.1	2.73	0.2	0.53	0.0666667	3.05667	0.2	1.15333	gi|695080662|ref|XP_009387808.1|	PREDICTED: trans-cinnamate 4-monooxygenase-like [Musa acuminata subsp. malaccensis]	sbi:SORBI_04g017460	hypothetical protein; K00487 trans-cinnamate 4-monooxygenase [EC:1.14.13.11]	At2g30490	[Q] KOG0156 Cytochrome P450 CYP2 subfamily	sp|H2DH22|C7A10_PANGI	Cytochrome P450 CYP73A100 OS=Panax ginseng PE=2 SV=1	GO:0016023 ;GO:0004497 ;GO:0005506 ;GO:0020037 ;GO:0016705 ;GO:0055114	CYP73A	CYP73
Zoff021240	D	454	1	0	0	0	0	3	0	0	0	0	1	0	0.05	0	0	0	0	0.15	0	0	0	0	0.05	0	0.0166667	0.05	0	0.0166667	gi|343469781|emb|CCD17326.1|	unnamed protein product [Trypanosoma congolense IL3000]	tbr:Tb927.3.680	cytochrome P450 (EC:1.14.-.-); K00517 [EC:1.14.-.-]	At1g31800	[QI] KOG0157 Cytochrome P450 CYP4/CYP19/CYP26 subfamilies	sp|Q93VK5|LUT5_ARATH	Protein LUTEIN DEFICIENT 5, chloroplastic OS=Arabidopsis thaliana GN=CYP97A3 PE=1 SV=1	GO:0046872 ;GO:0016705 ;GO:0004497	CYP97A	CYP97
Zoff021241	B	589	2	0	0	0	0	1	0	0	3	0	0	1	0.1	0	0	0	0	0.05	0	0	0.15	0	0	0.05	0.0333333	0.0166667	0.05	0.0166667	gi|340052531|emb|CCC46812.1|	putative cytochrome P450 [Trypanosoma vivax Y486]	tbr:Tb927.3.680	cytochrome P450 (EC:1.14.-.-); K00517 [EC:1.14.-.-]	7295226	[QI] KOG0157 Cytochrome P450 CYP4/CYP19/CYP26 subfamilies	sp|P79152|CP3AJ_CAPHE	Cytochrome P450 3A19 (Fragment) OS=Capra hircus aegagrus GN=CYP3A19 PE=2 SV=1	GO:0016491 ;GO:0005488	CYP3A	CYP3
Zoff021242	A	444	1	0	0	1	0	0	0	1	0	0	0	2	0.05	0	0	0.05	0	0	0	0.05	0	0	0	0.1	0.0166667	0.0166667	0.0166667	0.0333333	gi|261326717|emb|CBH09690.1|	cytochrome P450, putative [Trypanosoma brucei gambiense DAL972]	tbr:Tb927.3.680	cytochrome P450 (EC:1.14.-.-); K00517 [EC:1.14.-.-]	At4g15110	[QI] KOG0157 Cytochrome P450 CYP4/CYP19/CYP26 subfamilies	sp|P08516|CP4AA_RAT	Cytochrome P450 4A10 OS=Rattus norvegicus GN=Cyp4a10 PE=1 SV=2	GO:0016491	CYP4A	CYP4
Zoff022787	A	456	0	0	0	0	0	0	0	0	0	0	0	2	0	0	0	0	0	0	0	0	0	0	0	0.1	0	0	0	0.0333333	gi|695051829|ref|XP_009413956.1|	PREDICTED: cytochrome P450 98A2 [Musa acuminata subsp. malaccensis]	osa:4339188	Os05g0494000; K09754 p-coumarate 3-hydroxylase [EC:1.14.13.-]	--	--	sp|O48956|C98A1_SORBI	Cytochrome P450 98A1 OS=Sorghum bicolor GN=CYP98A1 PE=2 SV=1	--	CYP98A	CYP98
Zoff026559	A	704	2	0	0	0	0	0	0	0	0	0	0	0	0.1	0	0	0	0	0	0	0	0	0	0	0	0.0333333	0	0	0	gi|695061918|ref|XP_009419410.1|	PREDICTED: abscisic acid 8'-hydroxylase 3-like [Musa acuminata subsp. malaccensis]	rcu:RCOM_1170810	cytochrome P450, putative (EC:1.14.13.79)	At5g45340	[QI] KOG0157 Cytochrome P450 CYP4/CYP19/CYP26 subfamilies	sp|Q05JG2|ABAH1_ORYSJ	Abscisic acid 8'-hydroxylase 1 OS=Oryza sativa subsp. japonica GN=CYP707A5 PE=2 SV=1	GO:0020037 ;GO:0016705 ;GO:0004497 ;GO:0005506 ;GO:0055114	CYP707A	CYP707
Zoff027856	C	403	0	0	0	1	0	0	3	0	2	2	0	0	0	0	0	0.05	0	0	0.15	0	0.1	0.1	0	0	0	0.0166667	0.0833333	0.0333333	gi|403399730|sp|E3W9C4.1|C71A1_ZINZE	RecName: Full=Alpha-humulene 10-hydroxylase [Zingiber zerumbet]	vvi:100246036	hypothetical protein LOC100246036	At4g13310	[Q] KOG0156 Cytochrome P450 CYP2 subfamily	sp|E3W9C4|C71A1_ZINZE	Alpha-humulene 10-hydroxylase OS=Zingiber zerumbet GN=CYP71BA1 PE=1 SV=1	GO:0016491 ;GO:0005488	CYP71B	CYP71
Zoff029237	A	438	2	0	0	0	0	0	0	0	0	0	0	0	0.1	0	0	0	0	0	0	0	0	0	0	0	0.0333333	0	0	0	gi|675355708|gb|KFM28148.1|	putative cytochrome P450 524A1 [Auxenochlorella protothecoides]	osa:9267882	Os01g0211000	At2g34500	[QI] KOG0157 Cytochrome P450 CYP4/CYP19/CYP26 subfamilies	sp|O64697|C7101_ARATH	Cytochrome P450 710A1 OS=Arabidopsis thaliana GN=CYP710A1 PE=1 SV=1	GO:0005488 ;GO:0016023 ;GO:0004497 ;GO:0022900	CYP710A	CYP710
Zoff031249	C	869	2	3	11	0	1	3	0	0	0	5	0	1	0.1	0.17	0.55	0	0.05	0.15	0	0	0	0.25	0	0.05	0.273333	0.0666667	0	0.1	gi|695058613|ref|XP_009417625.1|	PREDICTED: abscisic acid 8'-hydroxylase 3-like [Musa acuminata subsp. malaccensis]	vvi:100245540	hypothetical protein LOC100245540; K09843 (+)-abscisic acid 8'-hydroxylase [EC:1.14.13.93]	At3g19270	[QI] KOG0157 Cytochrome P450 CYP4/CYP19/CYP26 subfamilies	sp|Q0J185|ABAH3_ORYSJ	Abscisic acid 8'-hydroxylase 3 OS=Oryza sativa subsp. japonica GN=CYP707A7 PE=2 SV=1	GO:0016021 ;GO:0055114 ;GO:0010295 ;GO:0046345 ;GO:0009055 ;GO:0016023 ;GO:0020037 ;GO:0005506 ;GO:0006950	CYP707A	CYP707
Zoff032920	D	1787	1	1	0	0	0	0	0	0	2	137	0	0	0.05	0.06	0	0	0	0	0	0	0.1	6.93	0	0	0.0366667	0	0.0333333	2.31	gi|302887248|ref|XP_003042512.1|	hypothetical protein NECHADRAFT_80996 [Nectria haematococca mpVI 77-13-4]	fgr:FG11498.1	hypothetical protein	--	--	sp|O00061|CP67_UROFA	Cytochrome P450 67 (Fragment) OS=Uromyces fabae GN=CYP67 PE=2 SV=1	GO:0020037 ;GO:0016705 ;GO:0004497 ;GO:0005506 ;GO:0032259 ;GO:0055114 ;GO:0008168 ;GO:0020037 ;GO:0016705 ;GO:0004497 ;GO:0005506 ;GO:0032259 ;GO:0055114 ;GO:0008168	CYP67	CYP67
Zoff034328	A	1138	1	1	6	0	0	0	0	0	0	0	0	0	0.05	0.06	0.3	0	0	0	0	0	0	0	0	0	0.136667	0	0	0	gi|671170948|ref|XP_008725940.1|	hypothetical protein G647_03373 [Cladophialophora carrionii CBS 160.54]	pno:SNOG_15063	hypothetical protein; K14338 cytochrome P450 / NADPH-cytochrome P450 reductase [EC:1.14.14.1 1.6.2.4]	Hs22049499	[C] KOG1158 NADP/FAD dependent oxidoreductase	sp|Q9Y8G7|C505_FUSOX	Bifunctional P-450:NADPH-P450 reductase OS=Fusarium oxysporum GN=CYP505 PE=1 SV=1	GO:0046872 ;GO:0016705 ;GO:0097159 ;GO:1901363	CYP505	CYP505
Zoff034329	C	591	0	0	3	0	0	0	0	0	0	0	0	0	0	0	0.15	0	0	0	0	0	0	0	0	0	0.05	0	0	0	gi|671170948|ref|XP_008725940.1|	hypothetical protein G647_03373 [Cladophialophora carrionii CBS 160.54]	pno:SNOG_15063	hypothetical protein; K14338 cytochrome P450 / NADPH-cytochrome P450 reductase [EC:1.14.14.1 1.6.2.4]	CE02018	[C] KOG1158 NADP/FAD dependent oxidoreductase	sp|Q9Y8G7|C505_FUSOX	Bifunctional P-450:NADPH-P450 reductase OS=Fusarium oxysporum GN=CYP505 PE=1 SV=1	GO:0046872 ;GO:0016705 ;GO:0097159 ;GO:1901363	CYP505	CYP505
Zoff034330	A	338	0	0	2	0	0	0	0	0	0	0	0	0	0	0	0.1	0	0	0	0	0	0	0	0	0	0.0333333	0	0	0	gi|671170948|ref|XP_008725940.1|	hypothetical protein G647_03373 [Cladophialophora carrionii CBS 160.54]	pcs:Pc20g04310	Pc20g04310; K14338 cytochrome P450 / NADPH-cytochrome P450 reductase [EC:1.14.14.1 1.6.2.4]	At1g31800	[QI] KOG0157 Cytochrome P450 CYP4/CYP19/CYP26 subfamilies	sp|Q9Y8G7|C505_FUSOX	Bifunctional P-450:NADPH-P450 reductase OS=Fusarium oxysporum GN=CYP505 PE=1 SV=1	GO:0003958 ;GO:0005506 ;GO:0010181 ;GO:0020037 ;GO:0070330 ;GO:0055114	CYP505	CYP505
Zoff036836	B	660	1	0	0	0	0	4	0	0	0	0	0	0	0.05	0	0	0	0	0.2	0	0	0	0	0	0	0.0166667	0.0666667	0	0	gi|695394683|ref|XP_009520958.1|	hypothetical protein PHYSODRAFT_359519 [Phytophthora sojae]	pif:PITG_06954	NADPH-cytochrome P450 reductase, putative; K00597 [methionine synthase] reductase [EC:1.16.1.8]	7297099	[C] KOG1158 NADP/FAD dependent oxidoreductase	sp|Q498R1|MTRR_RAT	Methionine synthase reductase OS=Rattus norvegicus GN=Mtrr PE=2 SV=2	GO:0016491 ;GO:0005506 ;GO:0055114 ;GO:0010181	CYP	CYP
Zoff037194	A	433	0	0	0	0	0	0	0	0	0	0	0	4	0	0	0	0	0	0	0	0	0	0	0	0.2	0	0	0	0.0666667	gi|703154632|ref|XP_010110992.1|	Cytochrome P450 710A1 [Morus notabilis]	smo:SELMODRAFT_234389	hypothetical protein	At2g34490	[QI] KOG0157 Cytochrome P450 CYP4/CYP19/CYP26 subfamilies	sp|O64698|C7102_ARATH	Cytochrome P450 710A2 OS=Arabidopsis thaliana GN=CYP710A2 PE=2 SV=1	GO:0005488 ;GO:0016705 ;GO:0044710	CYP710A	CYP710
Zoff037195	A	1266	0	0	0	0	0	0	0	0	0	0	0	23	0	0	0	0	0	0	0	0	0	0	0	1.16	0	0	0	0.386667	gi|281205351|gb|EFA79543.1|	cytochrome P450 family protein [Polysphondylium pallidum PN500]	ddi:DDB_G0269016	CYP524A1; cytochrome P450 family protein; K00517 [EC:1.14.-.-]	At2g34490	[QI] KOG0157 Cytochrome P450 CYP4/CYP19/CYP26 subfamilies	sp|Q55EK2|C524A_DICDI	Probable cytochrome P450 524A1 OS=Dictyostelium discoideum GN=cyp524A1 PE=3 SV=1	GO:0006629 ;GO:0016491	CYP710A	CYP710
Zoff038510	A	1916	0	2	30	0	0	0	0	0	2	1	0	2	0	0.11	1.49	0	0	0	0	0	0.1	0.05	0	0.1	0.533333	0	0.0333333	0.05	gi|656905752|gb|KEF51499.1|	hypothetical protein A1O9_12416 [Exophiala aquamarina CBS 119918]	nfi:NFIA_040740	cytochrome P450, putative	Hs4503205	[Q] KOG0159 Cytochrome P450 CYP11/CYP12/CYP24/CYP27 subfamilies	sp|Q12612|TRI4_FUSSP	Trichodiene oxygenase OS=Fusarium sporotrichioides GN=TRI4 PE=3 SV=1	GO:0020037 ;GO:0016705 ;GO:0004497 ;GO:0005506 ;GO:0055114	CYP	CYP
Zoff038827	D	575	2	0	0	0	0	0	0	4	3	1	0	0	0.1	0	0	0	0	0	0	0.2	0.15	0.05	0	0	0.0333333	0	0.116667	0.0166667	gi|672135941|ref|XP_008791649.1|	PREDICTED: cytochrome P450 84A1-like [Phoenix dactylifera]	zma:100273589	hypothetical protein LOC100273589; K09755 ferulate-5-hydroxylase [EC:1.14.-.-]	At4g36220	[Q] KOG0156 Cytochrome P450 CYP2 subfamily	sp|Q42600|C84A1_ARATH	Cytochrome P450 84A1 OS=Arabidopsis thaliana GN=CYP84A1 PE=1 SV=1	GO:0020037 ;GO:0016705 ;GO:0022900 ;GO:0004497 ;GO:0005506	CYP84A	CYP84
Zoff038896	A	715	11	0	0	0	0	0	0	0	0	0	0	0	0.54	0	0	0	0	0	0	0	0	0	0	0	0.18	0	0	0	gi|390348233|ref|XP_789944.3|	PREDICTED: cytochrome P450 3A24-like [Strongylocentrotus purpuratus]	bfo:BRAFLDRAFT_85620	hypothetical protein	7304034	[Q] KOG0158 Cytochrome P450 CYP3/CYP5/CYP6/CYP9 subfamilies	sp|Q9V4U9|C6A13_DROME	Probable cytochrome P450 6a13 OS=Drosophila melanogaster GN=Cyp6a13 PE=2 SV=1	--	CYP6A	CYP6
Zoff042846	B	336	0	0	0	0	0	0	0	0	0	0	0	3	0	0	0	0	0	0	0	0	0	0	0	0.15	0	0	0	0.05	gi|661886531|emb|CDP09895.1|	unnamed protein product [Coffea canephora]	rcu:RCOM_1679920	cytochrome P450, putative (EC:1.14.13.88)	At4g12330	[Q] KOG0156 Cytochrome P450 CYP2 subfamily	sp|Q9SBQ9|F3PH_PETHY	Flavonoid 3'-monooxygenase OS=Petunia hybrida GN=CYP75B2 PE=2 SV=1	GO:0020037 ;GO:0016705 ;GO:0004497 ;GO:0005506 ;GO:0055114	CYP75B	CYP75
Zoff042847	B	336	5	0	8	2	3	4	4	5	4	1	4	1	0.25	0	0.4	0.1	0.16	0.2	0.2	0.25	0.2	0.05	0.2	0.05	0.216667	0.153333	0.216667	0.1	gi|661888205|emb|CDP08322.1|	unnamed protein product [Coffea canephora]	rcu:RCOM_1679920	cytochrome P450, putative (EC:1.14.13.88)	At4g12330	[Q] KOG0156 Cytochrome P450 CYP2 subfamily	sp|Q9SBQ9|F3PH_PETHY	Flavonoid 3'-monooxygenase OS=Petunia hybrida GN=CYP75B2 PE=2 SV=1	GO:0020037 ;GO:0033772 ;GO:0005506 ;GO:0055114	CYP75B	CYP75
Zoff042848	B	336	3	1	1	0	3	0	1	2	1	2	4	4	0.15	0.06	0.05	0	0.16	0	0.05	0.1	0.05	0.1	0.2	0.2	0.0866667	0.0533333	0.0666667	0.166667	gi|661886531|emb|CDP09895.1|	unnamed protein product [Coffea canephora]	rcu:RCOM_1679920	cytochrome P450, putative (EC:1.14.13.88)	At4g12330	[Q] KOG0156 Cytochrome P450 CYP2 subfamily	sp|Q9SBQ9|F3PH_PETHY	Flavonoid 3'-monooxygenase OS=Petunia hybrida GN=CYP75B2 PE=2 SV=1	GO:0020037 ;GO:0016705 ;GO:0004497 ;GO:0005506 ;GO:0055114	CYP75B	CYP75
Zoff043137	A	880	33	20	33	0	12	5	33	43	24	19	13	15	1.62	1.15	1.64	0	0.62	0.25	1.62	2.15	1.18	0.96	0.64	0.76	1.47	0.29	1.65	0.786667	gi|695078423|ref|XP_009386597.1|	PREDICTED: protein LUTEIN DEFICIENT 5, chloroplastic [Musa acuminata subsp. malaccensis]	rcu:RCOM_1437260	cytochrome P450, putative (EC:1.14.14.1)	At1g31800	[QI] KOG0157 Cytochrome P450 CYP4/CYP19/CYP26 subfamilies	sp|Q93VK5|LUT5_ARATH	Protein LUTEIN DEFICIENT 5, chloroplastic OS=Arabidopsis thaliana GN=CYP97A3 PE=1 SV=1	GO:0009941 ;GO:0016117 ;GO:0016020 ;GO:0044262 ;GO:0016705 ;GO:0046872 ;GO:0004497 ;GO:0032787 ;GO:0044723 ;GO:0008654	CYP97A	CYP97
Zoff044192	A	410	0	0	2	0	0	0	0	0	0	0	0	0	0	0	0.1	0	0	0	0	0	0	0	0	0	0.0333333	0	0	0	gi|671147582|ref|XP_008712955.1|	hypothetical protein HMPREF1541_10062 [Cyphellophora europaea CBS 101466]	ang:ANI_1_428054	An06g00760; L-ornithine-N5-monooxygenase	--	--	sp|Q4WAW5|FTMC_ASPFU	Tryprostatin B 6-hydroxylase OS=Neosartorya fumigata (strain ATCC MYA-4609 / Af293 / CBS 101355 / FGSC A1100) GN=ftmP450-1 PE=3 SV=2	GO:0016491 ;GO:0005488	CYP	CYP
Zoff051670	C	386	0	1	0	0	0	0	0	0	0	0	0	0	0	0.06	0	0	0	0	0	0	0	0	0	0	0.02	0	0	0	gi|684159298|ref|XP_009153527.1|	cytochrome P450 oxidoreductase [Exophiala dermatitidis NIH/UT8656]	pno:SNOG_10886	hypothetical protein	Hs17456475	[QI] KOG0157 Cytochrome P450 CYP4/CYP19/CYP26 subfamilies	sp|P38364|PID6_FUSSO	Pisatin demethylase OS=Fusarium solani subsp. pisi GN=PDA6-1 PE=3 SV=1	GO:0046872 ;GO:0008152 ;GO:0016491	CYP	CYP
Zoff052424	B	676	0	0	0	1	0	11	0	1	0	0	0	0	0	0	0	0.05	0	0.54	0	0.05	0	0	0	0	0	0.196667	0.0166667	0	gi|695415557|ref|XP_009526595.1|	hypothetical protein PHYSODRAFT_499752 [Phytophthora sojae]	pif:PITG_14013	cytochrome P450, putative	At5g23190	[QI] KOG0157 Cytochrome P450 CYP4/CYP19/CYP26 subfamilies	sp|Q9FMY1|C86B1_ARATH	Cytochrome P450 86B1 OS=Arabidopsis thaliana GN=CYP86B1 PE=2 SV=1	GO:0016491 ;GO:0005488	CYP86B	CYP86
Zoff053322	B	424	0	0	0	0	0	3	0	0	0	0	0	0	0	0	0	0	0	0.15	0	0	0	0	0	0	0	0.05	0	0	gi|566022806|gb|ETI45717.1|	hypothetical protein F443_09789 [Phytophthora parasitica P1569]	pif:PITG_14013	cytochrome P450, putative	At2g45510	[QI] KOG0157 Cytochrome P450 CYP4/CYP19/CYP26 subfamilies	sp|Q9LMM1|C86A4_ARATH	Cytochrome P450 86A4 OS=Arabidopsis thaliana GN=CYP86A4 PE=1 SV=1	--	CYP86A	CYP86
Zoff053323	A	1029	0	0	0	3	0	17	0	0	0	0	0	0	0	0	0	0.15	0	0.84	0	0	0	0	0	0	0	0.33	0	0	gi|567988826|gb|ETL39097.1|	hypothetical protein L916_09494 [Phytophthora parasitica]	pif:PITG_13865	cytochrome P450, putative	At1g34540	[QI] KOG0157 Cytochrome P450 CYP4/CYP19/CYP26 subfamilies	sp|O81117|C94A1_VICSA	Cytochrome P450 94A1 OS=Vicia sativa GN=CYP94A1 PE=2 SV=2	--	CYP94A	CYP94
Zoff053947	A	1342	0	3.33	18.63	1	0	0	0	0	0	0	0	6.46	0	0.19	0.92	0.05	0	0	0	0	0	0	0	0.33	0.37	0.0166667	0	0.11	gi|700476121|gb|KGO63930.1|	Cytochrome P450 [Penicillium italicum]	nfi:NFIA_030840	cytochrome P450	At1g74550	[Q] KOG0156 Cytochrome P450 CYP2 subfamily	sp|B8NHY4|ORDA_ASPFN	O-methylsterigmatocystin oxidoreductase OS=Aspergillus flavus (strain ATCC 200026 / FGSC A1120 / NRRL 3357 / JCM 12722 / SRRC 167) GN=ordA PE=2 SV=1	GO:0020037 ;GO:0016705 ;GO:0005506 ;GO:0055114	CYP2	CYP2
Zoff053948	A	2047	5	2.67	81.37	0	0	0	0	0	0	0	0	2.54	0.25	0.15	4.04	0	0	0	0	0	0	0	0	0.13	1.48	0	0	0.0433333	gi|700476121|gb|KGO63930.1|	Cytochrome P450 [Penicillium italicum]	afm:AFUA_4G02730	O-methylsterigmatocystin oxidoreductase	At1g74550	[Q] KOG0156 Cytochrome P450 CYP2 subfamily	sp|B8NHY4|ORDA_ASPFN	O-methylsterigmatocystin oxidoreductase OS=Aspergillus flavus (strain ATCC 200026 / FGSC A1120 / NRRL 3357 / JCM 12722 / SRRC 167) GN=ordA PE=2 SV=1	GO:0046872 ;GO:0016491	CYP2	CYP2
Zoff055024	C	1881	3	2	40	0	1	0	0	1	0	5	0	0	0.15	0.11	1.98	0	0.05	0	0	0.05	0	0.25	0	0	0.746667	0.0166667	0.0166667	0.0833333	gi|628321496|ref|XP_007742572.1|	hypothetical protein A1O5_03771 [Cladophialophora psammophila CBS 110553]	mgr:MGG_09920	MG09920.4; hypothetical protein	At4g39490	[QI] KOG0157 Cytochrome P450 CYP4/CYP19/CYP26 subfamilies	sp|Q9Y758|CP52M_DEBHN	Cytochrome P450 52A13 OS=Debaryomyces hansenii GN=CYP52A13 PE=2 SV=1	GO:0020037 ;GO:0016712 ;GO:0005506 ;GO:0055114	CYP52A	CYP52
Zoff055796	D	1740	61	0	0	0	0	0	0	0	0	0	0	0	3	0	0	0	0	0	0	0	0	0	0	0	1	0	0	0	gi|675389734|gb|KFM82631.1|	Cytochrome P450 3A13, partial [Stegodyphus mimosarum]	ecb:100067064	CYP3A89; cytochrome P450 3A89; K07424 cytochrome P450, family 3, subfamily A [EC:1.14.14.1]	Hs13435386	[Q] KOG0158 Cytochrome P450 CYP3/CYP5/CYP6/CYP9 subfamilies	sp|Q29496|CP3AO_SHEEP	Cytochrome P450 3A24 OS=Ovis aries GN=CYP3A24 PE=2 SV=1	GO:0043227 ;GO:0004497 ;GO:0016491	CYP3A	CYP3
Zoff056629	B	1431	7	0	1	0	0	0	0	0	0	0	0	20	0.34	0	0.05	0	0	0	0	0	0	0	0	1.01	0.13	0	0	0.336667	gi|470457344|ref|XP_004341128.1|	cytochrome p450 superfamily protein [Acanthamoeba castellanii str. Neff]	dre:393451	cyp46a2, MGC63667, zgc:63667; cytochrome P450, family 46, subfamily A, polypeptide 2	Hs13435386	[Q] KOG0158 Cytochrome P450 CYP3/CYP5/CYP6/CYP9 subfamilies	sp|P24463|CP3AC_CANFA	Cytochrome P450 3A12 OS=Canis familiaris GN=CYP3A12 PE=2 SV=1	--	CYP46A	CYP46
Zoff057305	A	1794	24	15	12	2	3	3	14	41	33	1	0	3	1.18	0.86	0.6	0.1	0.16	0.15	0.69	2.05	1.63	0.05	0	0.15	0.88	0.136667	1.45667	0.0666667	gi|628263944|ref|XP_007730344.1|	hypothetical protein A1O3_02011 [Capronia epimyces CBS 606.96]	nfi:NFIA_047320	Cytochrome P450 oxidoreductase, putative	Hs13787189	[Q] KOG0156 Cytochrome P450 CYP2 subfamily	sp|Q4WAW8|FTME_ASPFU	Fumitremorgin C synthase OS=Neosartorya fumigata (strain ATCC MYA-4609 / Af293 / CBS 101355 / FGSC A1100) GN=ftmP450-2 PE=3 SV=1	GO:0020037 ;GO:0016705 ;GO:0005506 ;GO:0055114	CYP2	CYP2
Zoff057756	A	816	0	2	1	0	6	4	1	4	0	0	0	0	0	0.11	0.05	0	0.31	0.2	0.05	0.2	0	0	0	0	0.0533333	0.17	0.0833333	0	gi|590028839|gb|EXK30697.1|	hypothetical protein FOMG_13480 [Fusarium oxysporum f. sp. melonis 26406]	pno:SNOG_02648	hypothetical protein	At1g33720	[Q] KOG0156 Cytochrome P450 CYP2 subfamily	sp|P38364|PID6_FUSSO	Pisatin demethylase OS=Fusarium solani subsp. pisi GN=PDA6-1 PE=3 SV=1	GO:0046872 ;GO:0008152 ;GO:0016491	CYP	CYP
Zoff061281	B	580	0	0	1	0	0	0	0	0	0	0	0	6	0	0	0.05	0	0	0	0	0	0	0	0	0.3	0.0166667	0	0	0.1	gi|195022237|ref|XP_001985538.1|	GH17122 [Drosophila grimshawi]	dgr:Dgri_GH17122	GH17122 gene product from transcript GH17122-RA	CE09178	[Q] KOG0158 Cytochrome P450 CYP3/CYP5/CYP6/CYP9 subfamilies	sp|O17624|C13B1_CAEEL	Putative cytochrome P450 cyp-13B1 OS=Caenorhabditis elegans GN=cyp-13B1 PE=3 SV=2	--	CYP4C	CYP4
Zoff061793	D	501	0	0	0	0	0	0	0	0	0	0	0	0	0	0	0	0	0	0	0	0	0	0	0	0	0	0	0	0	gi|656917044|gb|KEF62622.1|	hypothetical protein A1O9_00595 [Exophiala aquamarina CBS 119918]	ani:AN7066.2	hypothetical protein	--	--	sp|A1DA60|FTMC_NEOFI	Tryprostatin B 6-hydroxylase OS=Neosartorya fischeri (strain ATCC 1020 / DSM 3700 / FGSC A1164 / NRRL 181) GN=ftmP450-1 PE=3 SV=1	GO:0016491 ;GO:0005488	CYP	CYP
Zoff061795	D	464	5	4	0	0	6	1	3	3	4	1	0	0	0.25	0.23	0	0	0.31	0.05	0.15	0.15	0.2	0.05	0	0	0.16	0.12	0.166667	0.0166667	gi|656917044|gb|KEF62622.1|	hypothetical protein A1O9_00595 [Exophiala aquamarina CBS 119918]	ani:AN0606.2	hypothetical protein	--	--	sp|Q4WAW5|FTMC_ASPFU	Tryprostatin B 6-hydroxylase OS=Neosartorya fumigata (strain ATCC MYA-4609 / Af293 / CBS 101355 / FGSC A1100) GN=ftmP450-1 PE=3 SV=2	GO:0016491 ;GO:0005488	CYP	CYP
Zoff061839	B	350	9	2.79	4.2	4.04	1.01	7.85	3	1	2	2.01	2.38	0	0.44	0.16	0.21	0.2	0.05	0.39	0.15	0.05	0.1	0.1	0.12	0	0.27	0.213333	0.1	0.0733333	gi|645241637|ref|XP_008227171.1|	PREDICTED: cytochrome P450 71D9-like [Prunus mume]	rcu:RCOM_0794410	cytochrome P450, putative (EC:1.14.13.68)	At5g25180	[Q] KOG0156 Cytochrome P450 CYP2 subfamily	sp|P49264|C71B1_THLAR	Cytochrome P450 71B1 OS=Thlaspi arvense GN=CYP71B1 PE=2 SV=1	GO:0020037 ;GO:0016705 ;GO:0004497 ;GO:0005506 ;GO:0055114	CYP71B	CYP71
Zoff061840	B	350	0	0	0	19.19	0	16.49	0	0	0	5.99	0	0	0	0	0	0.97	0	0.82	0	0	0	0.3	0	0	0	0.596667	0	0.1	gi|645241637|ref|XP_008227171.1|	PREDICTED: cytochrome P450 71D9-like [Prunus mume]	rcu:RCOM_0794410	cytochrome P450, putative (EC:1.14.13.68)	At5g25140	[Q] KOG0156 Cytochrome P450 CYP2 subfamily	sp|P49264|C71B1_THLAR	Cytochrome P450 71B1 OS=Thlaspi arvense GN=CYP71B1 PE=2 SV=1	GO:0020037 ;GO:0016705 ;GO:0004497 ;GO:0005506 ;GO:0055114	CYP71B	CYP71
Zoff061841	B	460	85.92	33.25	27.39	192.75	69.28	160.47	24.94	35	18	10	29.89	23	4.23	1.91	1.36	9.78	3.58	7.93	1.23	1.75	0.89	0.51	1.48	1.16	2.5	7.09667	1.29	1.05	gi|695035176|ref|XP_009405039.1|	PREDICTED: cytochrome P450 71B10-like [Musa acuminata subsp. malaccensis]	rcu:RCOM_1478730	cytochrome P450, putative (EC:1.14.13.68)	At3g26280	[Q] KOG0156 Cytochrome P450 CYP2 subfamily	sp|P49264|C71B1_THLAR	Cytochrome P450 71B1 OS=Thlaspi arvense GN=CYP71B1 PE=2 SV=1	GO:0020037 ;GO:0016705 ;GO:0004497 ;GO:0005506 ;GO:0055114	CYP71B	CYP71
Zoff061848	A	2544	0	0	0	0	0	0	0	0	2	110	0	0	0	0	0	0	0	0	0	0	0.1	5.56	0	0	0	0	0.0333333	1.85333	gi|302921074|ref|XP_003053211.1|	predicted protein [Nectria haematococca mpVI 77-13-4]	fgr:FG08809.1	hypothetical protein	CE16396	[Q] KOG0156 Cytochrome P450 CYP2 subfamily	sp|Q12612|TRI4_FUSSP	Trichodiene oxygenase OS=Fusarium sporotrichioides GN=TRI4 PE=3 SV=1	GO:0020037 ;GO:0016705 ;GO:0004497 ;GO:0005506 ;GO:0055114	CYP	CYP
Zoff062059	A	1100	0	1	10	0	0	0	0	0	0	0	0	0	0	0.06	0.5	0	0	0	0	0	0	0	0	0	0.186667	0	0	0	gi|656909362|gb|KEF55058.1|	hypothetical protein A1O9_08711 [Exophiala aquamarina CBS 119918]	afv:AFLA_029090	cytochrome P450 monooxygenase, putative	7293040	[QI] KOG0157 Cytochrome P450 CYP4/CYP19/CYP26 subfamilies	sp|P29980|CPXN_NOSS1	Probable cytochrome P450 110 OS=Nostoc sp. (strain PCC 7120 / UTEX 2576) GN=cyp110 PE=3 SV=3	GO:0020037 ;GO:0016705 ;GO:0004497 ;GO:0005506 ;GO:0055114	CYP110	CYP110
Zoff062963	B	438	0	0	0	0	0	0	2	0	1	0	0	0	0	0	0	0	0	0	0.1	0	0.05	0	0	0	0	0	0.05	0	gi|660961819|gb|KEP47829.1|	cytochrome P450 family protein, partial [Rhizoctonia solani 123E]	lbc:LACBIDRAFT_295462	hypothetical protein	--	--	sp|B8NHY4|ORDA_ASPFN	O-methylsterigmatocystin oxidoreductase OS=Aspergillus flavus (strain ATCC 200026 / FGSC A1120 / NRRL 3357 / JCM 12722 / SRRC 167) GN=ordA PE=2 SV=1	GO:0020037 ;GO:0016705 ;GO:0004497 ;GO:0005506 ;GO:0055114	CYP2	CYP2
Zoff062964	B	545	0	0	0	0	0	0	2	0	0	0	0	0	0	0	0	0	0	0	0.1	0	0	0	0	0	0	0	0.0333333	0	gi|660961819|gb|KEP47829.1|	cytochrome P450 family protein, partial [Rhizoctonia solani 123E]	lbc:LACBIDRAFT_295462	hypothetical protein	--	--	sp|B8NHY4|ORDA_ASPFN	O-methylsterigmatocystin oxidoreductase OS=Aspergillus flavus (strain ATCC 200026 / FGSC A1120 / NRRL 3357 / JCM 12722 / SRRC 167) GN=ordA PE=2 SV=1	GO:0020037 ;GO:0016705 ;GO:0004497 ;GO:0005506 ;GO:0055114	CYP2	CYP2
Zoff062965	A	418	0	0	0	0	0	0	2	0	1	0	0	0	0	0	0	0	0	0	0.1	0	0.05	0	0	0	0	0	0.05	0	gi|639560207|gb|KDN38011.1|	hypothetical protein RSAG8_09784, partial [Rhizoctonia solani AG-8 WAC10335]	afv:AFLA_073130	cytochrome P450 oxidoreductase OrdA-like, putative	Hs4503195	[Q] KOG0156 Cytochrome P450 CYP2 subfamily	sp|B8NHY4|ORDA_ASPFN	O-methylsterigmatocystin oxidoreductase OS=Aspergillus flavus (strain ATCC 200026 / FGSC A1120 / NRRL 3357 / JCM 12722 / SRRC 167) GN=ordA PE=2 SV=1	GO:0020037 ;GO:0016705 ;GO:0005506 ;GO:0055114	CYP	CYP
Zoff063525	B	1750	0	0	0	0	1	0	0	0	0	96	0	1	0	0	0	0	0.05	0	0	0	0	4.85	0	0.05	0	0.0166667	0	1.63333	gi|302888401|ref|XP_003043087.1|	hypothetical protein NECHADRAFT_51498 [Nectria haematococca mpVI 77-13-4]	fgr:FG08191.1	hypothetical protein	Hs4758104	[Q] KOG0684 Cytochrome P450	sp|O75881|CP7B1_HUMAN	25-hydroxycholesterol 7-alpha-hydroxylase OS=Homo sapiens GN=CYP7B1 PE=1 SV=2	GO:0046872 ;GO:0016491	CYP7B	CYP7
Zoff063643	D	481	0	1	2	0	0	0	0	0	0	0	0	0	0	0.06	0.1	0	0	0	0	0	0	0	0	0	0.0533333	0	0	0	gi|576993899|gb|EUC66565.1|	cytochrome P450 family monooxygenase [Rhizoctonia solani AG-3 Rhs1AP]	cci:CC1G_11080	cytochrome P450 monooxygenase pc-bph; K07824 benzoate 4-monooxygenase [EC:1.14.13.12]	--	--	sp|P17549|CP53_ASPNG	Benzoate 4-monooxygenase OS=Aspergillus niger GN=bphA PE=1 SV=1	GO:0020037 ;GO:0016705 ;GO:0004497 ;GO:0005506 ;GO:0055114	CYP	CYP
Zoff063644	D	481	3	0	0	0	0	0	0	0	0	0	0	0	0.15	0	0	0	0	0	0	0	0	0	0	0	0.05	0	0	0	gi|576993899|gb|EUC66565.1|	cytochrome P450 family monooxygenase [Rhizoctonia solani AG-3 Rhs1AP]	cci:CC1G_11080	cytochrome P450 monooxygenase pc-bph; K07824 benzoate 4-monooxygenase [EC:1.14.13.12]	--	--	sp|P17549|CP53_ASPNG	Benzoate 4-monooxygenase OS=Aspergillus niger GN=bphA PE=1 SV=1	GO:0020037 ;GO:0016705 ;GO:0004497 ;GO:0005506 ;GO:0055114	CYP	CYP
Zoff063647	A	359	0	0	0	0	1	0	0	0	0	0	0	0	0	0	0	0	0.05	0	0	0	0	0	0	0	0	0.0166667	0	0	gi|576993899|gb|EUC66565.1|	cytochrome P450 family monooxygenase [Rhizoctonia solani AG-3 Rhs1AP]	lbc:LACBIDRAFT_291185	cytochrome P450 monooxygenase; K07824 benzoate 4-monooxygenase [EC:1.14.13.12]	7302560	[Q] KOG0159 Cytochrome P450 CYP11/CYP12/CYP24/CYP27 subfamilies	sp|P17549|CP53_ASPNG	Benzoate 4-monooxygenase OS=Aspergillus niger GN=bphA PE=1 SV=1	GO:0020037 ;GO:0016705 ;GO:0004497 ;GO:0005506 ;GO:0055114	CYP	CYP
Zoff068250	D	621	0	0.5	0	0	2	0	0	0	0	0	0	0	0	0.03	0	0	0.1	0	0	0	0	0	0	0	0.01	0.0333333	0	0	gi|302882920|ref|XP_003040365.1|	hypothetical protein NECHADRAFT_34857 [Nectria haematococca mpVI 77-13-4]	fgr:FG11303.1	hypothetical protein	7302303	[Q] KOG0158 Cytochrome P450 CYP3/CYP5/CYP6/CYP9 subfamilies	sp|Q9PVE8|C330_FUNHE	Cytochrome P450 3A30 OS=Fundulus heteroclitus GN=cyp3a30 PE=2 SV=2	GO:0046872 ;GO:0016491	CYP3A	CYP3
Zoff068251	D	621	3	0.5	0	0	0	0	0	0	1	4	0	0	0.15	0.03	0	0	0	0	0	0	0.05	0.2	0	0	0.06	0	0.0166667	0.0666667	gi|302882920|ref|XP_003040365.1|	hypothetical protein NECHADRAFT_34857 [Nectria haematococca mpVI 77-13-4]	fgr:FG11303.1	hypothetical protein	7302303	[Q] KOG0158 Cytochrome P450 CYP3/CYP5/CYP6/CYP9 subfamilies	sp|Q9PVE8|C330_FUNHE	Cytochrome P450 3A30 OS=Fundulus heteroclitus GN=cyp3a30 PE=2 SV=2	GO:0046872 ;GO:0016491	CYP3A	CYP3
Zoff069181	D	2119	13	3	382	1	0	2	0	2	3	0	2	59	0.64	0.17	18.95	0.05	0	0.1	0	0.1	0.15	0	0.1	2.97	6.58667	0.05	0.0833333	1.02333	gi|628332363|ref|XP_007744751.1|	hypothetical protein A1O5_05965 [Cladophialophora psammophila CBS 110553]	cpw:CPC735_011130	Cytochrome P450 family protein	Hs4503233	[Q] KOG0158 Cytochrome P450 CYP3/CYP5/CYP6/CYP9 subfamilies	sp|Q12612|TRI4_FUSSP	Trichodiene oxygenase OS=Fusarium sporotrichioides GN=TRI4 PE=3 SV=1	GO:0003676 ;GO:0004497 ;GO:0005506 ;GO:0020037 ;GO:0016705 ;GO:0030529 ;GO:0055114	CYP	CYP
Zoff070642	A	413	0	0	0	0	0	0	0	0	0	9	0	0	0	0	0	0	0	0	0	0	0	0.46	0	0	0	0	0	0.153333	gi|697068812|ref|XP_009649590.1|	isotrichodermin C-15 hydroxylase [Verticillium dahliae VdLs.17]	fgr:FG06068.1	hypothetical protein	--	--	sp|Q4WAW5|FTMC_ASPFU	Tryprostatin B 6-hydroxylase OS=Neosartorya fumigata (strain ATCC MYA-4609 / Af293 / CBS 101355 / FGSC A1100) GN=ftmP450-1 PE=3 SV=2	GO:0020037 ;GO:0016705 ;GO:0004497 ;GO:0005506 ;GO:0055114	CYP548A	CYP548
Zoff071296	A	1435	0	1	14	0	0	0	0	0	0	0	0	1	0	0.06	0.69	0	0	0	0	0	0	0	0	0.05	0.25	0	0	0.0166667	gi|684161425|ref|XP_009154590.1|	cytochrome P450 oxidoreductase [Exophiala dermatitidis NIH/UT8656]	pno:SNOG_12749	hypothetical protein	Hs4503211	[Q] KOG0159 Cytochrome P450 CYP11/CYP12/CYP24/CYP27 subfamilies	sp|Q12612|TRI4_FUSSP	Trichodiene oxygenase OS=Fusarium sporotrichioides GN=TRI4 PE=3 SV=1	GO:0020037 ;GO:0016705 ;GO:0005506 ;GO:0055114	CYP	CYP
Zoff071429	B	835	4	4	3	1	0	4	0	0	0	0	0	0	0.2	0.23	0.15	0.05	0	0.2	0	0	0	0	0	0	0.193333	0.0833333	0	0	gi|576985812|gb|EUC58548.1|	cytochrome P450 family monooxygenase [Rhizoctonia solani AG-3 Rhs1AP]	lbc:LACBIDRAFT_393891	cytochrome P450 monooxygenase CYP63	At1g69500	[QI] KOG0157 Cytochrome P450 CYP4/CYP19/CYP26 subfamilies	sp|Q9Y757|CP52L_DEBHN	Cytochrome P450 52A12 OS=Debaryomyces hansenii GN=CYP52A12 PE=2 SV=2	GO:0020037 ;GO:0016705 ;GO:0004497 ;GO:0005506 ;GO:0055114	CYP52A	CYP52
Zoff072646	B	369	0	0	0	0	1	0	1	0	1	1	0	2	0	0	0	0	0.05	0	0.05	0	0.05	0.05	0	0.1	0	0.0166667	0.0333333	0.05	gi|695052922|ref|XP_009414535.1|	PREDICTED: cytochrome P450 703A2 [Musa acuminata subsp. malaccensis]	zma:100282873	pco115177; LOC100282873	At1g01280	[Q] KOG0156 Cytochrome P450 CYP2 subfamily	sp|Q9LNJ4|C70A2_ARATH	Cytochrome P450 703A2 OS=Arabidopsis thaliana GN=CYP703A2 PE=2 SV=1	GO:0009055 ;GO:0005506 ;GO:0016709 ;GO:0020037 ;GO:0051792 ;GO:0080110 ;GO:0055114	CYP703A	CYP703
Zoff072647	B	413	1	1	2	0	0	0	0	9	0	0	2	3	0.05	0.06	0.1	0	0	0	0	0.45	0	0	0.1	0.15	0.07	0	0.15	0.0833333	gi|695052922|ref|XP_009414535.1|	PREDICTED: cytochrome P450 703A2 [Musa acuminata subsp. malaccensis]	zma:100282873	pco115177; LOC100282873	At1g01280	[Q] KOG0156 Cytochrome P450 CYP2 subfamily	sp|Q9LNJ4|C70A2_ARATH	Cytochrome P450 703A2 OS=Arabidopsis thaliana GN=CYP703A2 PE=2 SV=1	GO:0009055 ;GO:0005506 ;GO:0016709 ;GO:0020037 ;GO:0051792 ;GO:0080110 ;GO:0055114	CYP703A	CYP703
Zoff073839	B	377	0	0	3	0	0	0	0	1	1	0	0	0	0	0	0.15	0	0	0	0	0.05	0.05	0	0	0	0.05	0	0.0333333	0	gi|672128173|ref|XP_008787566.1|	PREDICTED: cytokinin hydroxylase [Phoenix dactylifera]	vvi:100253152	hypothetical protein LOC100253152	At5g52400	[QI] KOG0157 Cytochrome P450 CYP4/CYP19/CYP26 subfamilies	sp|Q2QYH7|C14C2_ORYSJ	Cytochrome P450 714C2 OS=Oryza sativa subsp. japonica GN=CYP714C2 PE=2 SV=1	GO:0016491 ;GO:0005488	CYP714C	CYP714
Zoff074720	A	566	1	0	1	1	1	0	0	0	0	0	0	0	0.05	0	0.05	0.05	0.05	0	0	0	0	0	0	0	0.0333333	0.0333333	0	0	gi|639556021|gb|KDN34391.1|	hypothetical protein RSAG8_12524, partial [Rhizoctonia solani AG-8 WAC10335]	cci:CC1G_11452	cytochrome P450	Hs4503201	[Q] KOG0156 Cytochrome P450 CYP2 subfamily	sp|B8NHY4|ORDA_ASPFN	O-methylsterigmatocystin oxidoreductase OS=Aspergillus flavus (strain ATCC 200026 / FGSC A1120 / NRRL 3357 / JCM 12722 / SRRC 167) GN=ordA PE=2 SV=1	GO:0020037 ;GO:0016705 ;GO:0004497 ;GO:0005506 ;GO:0055114	CYP	CYP
Zoff077671	A	326	0	0	1	0	0	0	0	0	0	0	0	0	0	0	0.05	0	0	0	0	0	0	0	0	0	0.0166667	0	0	0	gi|630036324|ref|XP_007839344.1|	hypothetical protein PFICI_12572 [Pestalotiopsis fici W106-1]	mgr:MG10351.4	hypothetical protein	Hs4503211	[Q] KOG0159 Cytochrome P450 CYP11/CYP12/CYP24/CYP27 subfamilies	sp|O94142|KO1_GIBFU	Ent-kaurene oxidase OS=Gibberella fujikuroi GN=CYP503A1 PE=1 SV=1	GO:0046872 ;GO:0016491	CYP503A	CYP503
Zoff080199	C	1262	0	0	0	0	0	0	0	0	0	25	0	0	0	0	0	0	0	0	0	0	0	1.26	0	0	0	0	0	0.42	gi|342884594|gb|EGU84801.1|	hypothetical protein FOXB_04696 [Fusarium oxysporum Fo5176]	fgr:FG09786.1	hypothetical protein; K00327 NADPH-ferrihemoprotein reductase [EC:1.6.2.4]	SPBC365.17	[C] KOG1158 NADP/FAD dependent oxidoreductase	sp|A2QS05|NCPR_ASPNC	NADPH--cytochrome P450 reductase OS=Aspergillus niger (strain CBS 513.88 / FGSC A1513) GN=cprA PE=3 SV=1	GO:0005789 ;GO:0003958 ;GO:0005506 ;GO:0010181 ;GO:0055114	CYP	CYP
Zoff080909	B	1626	0	0	0	0	0.5	11.52	0	0	0	0	0	0	0	0	0	0	0.03	0.57	0	0	0	0	0	0	0	0.2	0	0	gi|566022806|gb|ETI45717.1|	hypothetical protein F443_09789 [Phytophthora parasitica P1569]	pif:PITG_14013	cytochrome P450, putative	At3g56630	[QI] KOG0157 Cytochrome P450 CYP4/CYP19/CYP26 subfamilies	sp|Q9SMP5|C94B3_ARATH	Cytochrome P450 94B3 OS=Arabidopsis thaliana GN=CYP94B3 PE=2 SV=1	--	CYP94B	CYP94
Zoff080910	B	1626	0	0	0	1	0.5	36.48	0	0	0	0	0	0	0	0	0	0.05	0.03	1.8	0	0	0	0	0	0	0	0.626667	0	0	gi|695415557|ref|XP_009526595.1|	hypothetical protein PHYSODRAFT_499752 [Phytophthora sojae]	pif:PITG_14013	cytochrome P450, putative	At3g56630	[QI] KOG0157 Cytochrome P450 CYP4/CYP19/CYP26 subfamilies	sp|O81117|C94A1_VICSA	Cytochrome P450 94A1 OS=Vicia sativa GN=CYP94A1 PE=2 SV=2	--	CYP94A	CYP94
Zoff080911	A	569	0	0	0	0	0	6	0	0	0	0	0	0	0	0	0	0	0	0.3	0	0	0	0	0	0	0	0.1	0	0	gi|570981640|gb|ETP42023.1|	hypothetical protein F442_11037 [Phytophthora parasitica P10297]	pif:PITG_14016	cytochrome P450, putative	--	--	--	--	--	CYP86A	CYP86
Zoff080912	D	367	0	0	0	0	0	2	0	0	0	0	0	0	0	0	0	0	0	0.1	0	0	0	0	0	0	0	0.0333333	0	0	gi|301100906|ref|XP_002899542.1|	cytochrome P450, putative [Phytophthora infestans T30-4]	pif:PITG_13865	cytochrome P450, putative	At1g13150	[QI] KOG0157 Cytochrome P450 CYP4/CYP19/CYP26 subfamilies	sp|Q9ZUX1|C94C1_ARATH	Cytochrome P450 94C1 OS=Arabidopsis thaliana GN=CYP94C1 PE=2 SV=1	GO:0016491 ;GO:0005488	CYP94C	CYP94
Zoff081507	C	672	0	0	0	0	1	0	0	0	0	1	0	7	0	0	0	0	0.05	0	0	0	0	0.05	0	0.35	0	0.0166667	0	0.133333	gi|66826091|ref|XP_646400.1|	NADPH-cytochrome-P450 oxidoreductase [Dictyostelium discoideum AX4]	ddi:DDB_G0269912	redB; NADPH-cytochrome-P450 oxidoreductase; K00327 NADPH-ferrihemoprotein reductase [EC:1.6.2.4]	7297099	[C] KOG1158 NADP/FAD dependent oxidoreductase	sp|Q55CT1|REDB_DICDI	NADPH oxidoreductase B OS=Dictyostelium discoideum GN=redB PE=2 SV=1	--	CYP	CYP
Zoff081508	A	452	0	1	0	3	0	0	0	0	0	0	0	2	0	0.06	0	0.15	0	0	0	0	0	0	0	0.1	0.02	0.05	0	0.0333333	gi|569327880|gb|ETO01351.1|	NADPH-cytochrome-P450 oxidoreductase [Reticulomyxa filosa]	ncr:NCU09741	NADPH-cytochrome P450 reductase; K00327 NADPH-ferrihemoprotein reductase [EC:1.6.2.4]	7297099	[C] KOG1158 NADP/FAD dependent oxidoreductase	sp|Q55CT1|REDB_DICDI	NADPH oxidoreductase B OS=Dictyostelium discoideum GN=redB PE=2 SV=1	GO:0016491 ;GO:0043167 ;GO:0016020 ;GO:0005783	CYP	CYP
Zoff082056	B	490	0	0	0	0	1.89	0	0	0	0	0	0	0	0	0	0	0	0.1	0	0	0	0	0	0	0	0	0.0333333	0	0	gi|313760501|dbj|BAJ41269.1|	NADPH-P450 reductase 2 [Zingiber officinale]	vvi:100240979	hypothetical protein LOC100240979; K00327 NADPH-ferrihemoprotein reductase [EC:1.6.2.4]	At4g30210	[C] KOG1158 NADP/FAD dependent oxidoreductase	sp|Q05001|NCPR_CATRO	NADPH--cytochrome P450 reductase OS=Catharanthus roseus GN=CPR PE=2 SV=1	--	CYP	CYP
Zoff082057	B	563	0	0	0	0	3.11	0	0	1	0	0	0	0	0	0	0	0	0.16	0	0	0.05	0	0	0	0	0	0.0533333	0.0166667	0	gi|313760501|dbj|BAJ41269.1|	NADPH-P450 reductase 2 [Zingiber officinale]	vvi:100240979	hypothetical protein LOC100240979; K00327 NADPH-ferrihemoprotein reductase [EC:1.6.2.4]	At4g30210	[C] KOG1158 NADP/FAD dependent oxidoreductase	sp|Q05001|NCPR_CATRO	NADPH--cytochrome P450 reductase OS=Catharanthus roseus GN=CPR PE=2 SV=1	--	CYP	CYP
Zoff082186	B	917	368	244	545	4	1	6	32	180	70	145	98	252	18.11	14.02	27.04	0.2	0.05	0.3	1.57	9.02	3.46	7.33	4.85	12.69	19.7233	0.183333	4.68333	8.29	gi|695032368|ref|XP_009403729.1|	PREDICTED: cytochrome P450 94C1-like [Musa acuminata subsp. malaccensis]	rcu:RCOM_0331070	cytochrome P450, putative (EC:1.14.14.1)	At2g27690	[QI] KOG0157 Cytochrome P450 CYP4/CYP19/CYP26 subfamilies	sp|P85191|CP450_HELAN	Cytochrome P450 (Fragment) OS=Helianthus annuus PE=1 SV=1	GO:0020037 ;GO:0005506 ;GO:0070330 ;GO:0055114	CYP94C	CYP94
Zoff082570	D	386	0	0	0	0	0	5	0	0	0	0	0	0	0	0	0	0	0	0.25	0	0	0	0	0	0	0	0.0833333	0	0	gi|570950279|gb|ETP15536.1|	hypothetical protein F441_09731, partial [Phytophthora parasitica CJ01A1]	pif:PITG_14018	cytochrome P450, putative	At2g45970	[QI] KOG0157 Cytochrome P450 CYP4/CYP19/CYP26 subfamilies	sp|O80823|C86A8_ARATH	Cytochrome P450 86A8 OS=Arabidopsis thaliana GN=CYP86A8 PE=2 SV=1	GO:0020037 ;GO:0016705 ;GO:0004497 ;GO:0005506 ;GO:0055114	CYP86A	CYP86
Zoff082682	A	1626	0	0	0	0	0	0	0	0	0	43	0	0	0	0	0	0	0	0	0	0	0	2.17	0	0	0	0	0	0.723333	gi|302881649|ref|XP_003039735.1|	hypothetical protein NECHADRAFT_50293 [Nectria haematococca mpVI 77-13-4]	fgr:FG09195.1	hypothetical protein	At5g09970	[Q] KOG0156 Cytochrome P450 CYP2 subfamily	sp|O94142|KO1_GIBFU	Ent-kaurene oxidase OS=Gibberella fujikuroi GN=CYP503A1 PE=1 SV=1	GO:0020037 ;GO:0016705 ;GO:0004497 ;GO:0005506 ;GO:0055114	CYP503A	CYP503
Zoff082874	C	1182	0	1	21	0	0	0	1	0	0	0	0	0	0	0.06	1.04	0	0	0	0.05	0	0	0	0	0	0.366667	0	0.0166667	0	gi|628310323|ref|XP_007741006.1|	hypothetical protein A1O5_02200 [Cladophialophora psammophila CBS 110553]	pcs:Pc21g22470	Pc21g22470	At4g13770	[Q] KOG0156 Cytochrome P450 CYP2 subfamily	sp|Q4WAW8|FTME_ASPFU	Fumitremorgin C synthase OS=Neosartorya fumigata (strain ATCC MYA-4609 / Af293 / CBS 101355 / FGSC A1100) GN=ftmP450-2 PE=3 SV=1	GO:0046872 ;GO:0016491	CYP2	CYP2
Zoff082875	C	482	0	0	4	0	0	0	0	0	0	0	0	0	0	0	0.2	0	0	0	0	0	0	0	0	0	0.0666667	0	0	0	gi|656910945|gb|KEF56578.1|	hypothetical protein A1O9_06767 [Exophiala aquamarina CBS 119918]	pcs:Pc21g22470	Pc21g22470	At5g57220	[Q] KOG0156 Cytochrome P450 CYP2 subfamily	sp|O13345|ORDA_ASPPA	O-methylsterigmatocystin oxidoreductase OS=Aspergillus parasiticus GN=ordA PE=1 SV=1	GO:0020037 ;GO:0016705 ;GO:0004497 ;GO:0005506 ;GO:0055114	CYP	CYP
Zoff085848	D	701	0	0	0	0	0	0	0	0	0	8.12	0	0	0	0	0	0	0	0	0	0	0	0.41	0	0	0	0	0	0.136667	gi|302888020|ref|XP_003042897.1|	hypothetical protein NECHADRAFT_37052 [Nectria haematococca mpVI 77-13-4]	fgr:FG02872.1	hypothetical protein	Hs13929429	[Q] KOG0684 Cytochrome P450	sp|Q7YRB2|CP8B1_PIG	5-beta-cholestane-3-alpha,7-alpha-diol 12-alpha-hydroxylase OS=Sus scrofa GN=CYP8B1 PE=2 SV=1	GO:0020037 ;GO:0016705 ;GO:0004497 ;GO:0005506 ;GO:0055114	CYP8B	CYP8
Zoff085849	D	701	0	0	0	0	0	0	0	0	0	4.88	0	0	0	0	0	0	0	0	0	0	0	0.25	0	0	0	0	0	0.0833333	gi|302888020|ref|XP_003042897.1|	hypothetical protein NECHADRAFT_37052 [Nectria haematococca mpVI 77-13-4]	fgr:FG02872.1	hypothetical protein	Hs13929429	[Q] KOG0684 Cytochrome P450	sp|Q7YRB2|CP8B1_PIG	5-beta-cholestane-3-alpha,7-alpha-diol 12-alpha-hydroxylase OS=Sus scrofa GN=CYP8B1 PE=2 SV=1	GO:0020037 ;GO:0016705 ;GO:0004497 ;GO:0005506 ;GO:0055114	CYP8B	CYP8
Zoff086269	B	1772	1	0	0	3	0	100	0	0	0	1	0	0	0.05	0	0	0.15	0	4.94	0	0	0	0.05	0	0	0.0166667	1.69667	0	0.0166667	gi|695415557|ref|XP_009526595.1|	hypothetical protein PHYSODRAFT_499752 [Phytophthora sojae]	pif:PITG_14013	cytochrome P450, putative	At4g00360	[QI] KOG0157 Cytochrome P450 CYP4/CYP19/CYP26 subfamilies	sp|O23066|C86A2_ARATH	Cytochrome P450 86A2 OS=Arabidopsis thaliana GN=CYP86A2 PE=1 SV=1	GO:0046872 ;GO:0016491 ;GO:0046872 ;GO:0016491	CYP86A	CYP86
Zoff087433	B	800	2.52	0	0	0	0	0	0	0	0	0	0	0	0.12	0	0	0	0	0	0	0	0	0	0	0	0.04	0	0	0	gi|241671641|ref|XP_002400112.1|	cytochrome P450, putative [Ixodes scapularis]	isc:IscW_ISCW022077	cytochrome P450, putative (EC:1.14.14.1)	Hs4503199	[Q] KOG0156 Cytochrome P450 CYP2 subfamily	sp|P33616|CP1A1_MACFA	Cytochrome P450 1A1 OS=Macaca fascicularis GN=CYP1A1 PE=2 SV=1	GO:0016491 ;GO:0044237	CYP1A	CYP1
Zoff087434	B	576	0.48	0	0	0	0	0	0	0	0	0	0	0	0.02	0	0	0	0	0	0	0	0	0	0	0	0.00666667	0	0	0	gi|241671641|ref|XP_002400112.1|	cytochrome P450, putative [Ixodes scapularis]	isc:IscW_ISCW022077	cytochrome P450, putative (EC:1.14.14.1)	Hs4503203	[Q] KOG0156 Cytochrome P450 CYP2 subfamily	sp|Q06367|CP1A1_CAVPO	Cytochrome P450 1A1 OS=Cavia porcellus GN=CYP1A1 PE=1 SV=1	GO:0016491	CYP1A	CYP1
Zoff088292	A	1079	40	36	30	7	25	15	15	13	26	9	11	8	1.97	2.07	1.49	0.36	1.29	0.74	0.74	0.65	1.28	0.46	0.54	0.4	1.84333	0.796667	0.89	0.466667	gi|695012080|ref|XP_009392783.1|	PREDICTED: ent-kaurenoic acid oxidase 1-like [Musa acuminata subsp. malaccensis]	rcu:RCOM_0659440	Ent-kaurenoic acid oxidase, putative (EC:1.14.13.79); K04123 ent-kaurenoic acid hydroxylase [EC:1.14.13.79]	At1g05160	[QI] KOG0157 Cytochrome P450 CYP4/CYP19/CYP26 subfamilies	sp|O23051|KAO1_ARATH	Ent-kaurenoic acid oxidase 1 OS=Arabidopsis thaliana GN=KAO1 PE=2 SV=1	GO:0016021 ;GO:0055114 ;GO:0051777 ;GO:0009055 ;GO:0020037 ;GO:0009686 ;GO:0005789 ;GO:0005506 ;GO:0020037 ;GO:0016705 ;GO:0004497 ;GO:0005506 ;GO:0055114	CYP	CYP
Zoff088960	C	1694	7	0	19	0	0	0	4	0	0	0	0	3	0.34	0	0.94	0	0	0	0.2	0	0	0	0	0.15	0.426667	0	0.0666667	0.05	gi|470260554|ref|XP_004360144.1|	cytochrome P450 family protein [Dictyostelium fasciculatum]	ddi:DDB_G0279403	CYP51; cytochrome P450 family protein; K05917 cytochrome P450, family 51 (sterol 14-demethylase) [EC:1.14.13.70]	At1g11680	[Q] KOG0684 Cytochrome P450	sp|Q1ZXH9|CP51_DICDI	Probable lanosterol 14-alpha demethylase OS=Dictyostelium discoideum GN=cyp51 PE=3 SV=1	GO:0009086 ;GO:0008398 ;GO:0046872 ;GO:0000394 ;GO:0005794 ;GO:0005783 ;GO:0019745 ;GO:0005886 ;GO:0016126	CYP51	CYP51
Zoff090322	B	353	2	0	4	0	1.4	0	1	1	0	0	6	2	0.1	0	0.2	0	0.07	0	0.05	0.05	0	0	0.3	0.1	0.1	0.0233333	0.0333333	0.133333	gi|629119266|gb|KCW83756.1|	hypothetical protein EUGRSUZ_B00627 [Eucalyptus grandis]	ath:AT1G74110	CYP78A10; electron carrier/ heme binding / iron ion binding / monooxygenase/ oxygen binding	At1g74110	[Q] KOG0156 Cytochrome P450 CYP2 subfamily	sp|Q9LMX7|C78A5_ARATH	Cytochrome P450 78A5 OS=Arabidopsis thaliana GN=CYP78A5 PE=2 SV=1	GO:0009055 ;GO:0004497 ;GO:0005506 ;GO:0020037 ;GO:0016705 ;GO:0009507 ;GO:0019825 ;GO:0055114	CYP78A	CYP78
Zoff090323	B	353	0	0	0	0	5.6	0	0	0	0	0	0	0	0	0	0	0	0.29	0	0	0	0	0	0	0	0	0.0966667	0	0	gi|595850349|ref|XP_007209897.1|	hypothetical protein PRUPE_ppa004083mg [Prunus persica]	ath:AT1G74110	CYP78A10; electron carrier/ heme binding / iron ion binding / monooxygenase/ oxygen binding	At1g74110	[Q] KOG0156 Cytochrome P450 CYP2 subfamily	sp|Q9LMX7|C78A5_ARATH	Cytochrome P450 78A5 OS=Arabidopsis thaliana GN=CYP78A5 PE=2 SV=1	GO:0033772 ;GO:0005506 ;GO:0020037 ;GO:0009507 ;GO:0019825 ;GO:0055114	CYP78A	CYP78
Zoff090584	A	362	4	2	0	0	0	2	4	6	3	4	0	0	0.2	0.11	0	0	0	0.1	0.2	0.3	0.15	0.2	0	0	0.103333	0.0333333	0.216667	0.0666667	gi|356526027|ref|XP_003531621.1|	PREDICTED: 3-epi-6-deoxocathasterone 23-monooxygenase isoform X1 [Glycine max]	pop:POPTR_703918	CYP90D5; cytochrome P450 probable 6-deoxoteasterone to 3-dehydro 6-deoxoteasterone or teasterone to 3-dehydro teasterone	At4g36380	[QI] KOG0157 Cytochrome P450 CYP4/CYP19/CYP26 subfamilies	sp|Q94IW5|C90D2_ORYSJ	Cytochrome P450 90D2 OS=Oryza sativa subsp. japonica GN=CYP90D2 PE=1 SV=1	GO:0016132 ;GO:0016021 ;GO:0022900 ;GO:0009055 ;GO:0048441 ;GO:0048443 ;GO:0048366 ;GO:0020037 ;GO:0016709 ;GO:0005789 ;GO:0005506	CYP90D	CYP90
Zoff090789	A	1882	2	1	45	0	0	0	2	0	0	0	1	7	0.1	0.06	2.23	0	0	0	0.1	0	0	0	0.05	0.35	0.796667	0	0.0333333	0.133333	gi|628324540|ref|XP_007743124.1|	hypothetical protein A1O5_04327 [Cladophialophora psammophila CBS 110553]	pno:SNOG_15745	hypothetical protein	Hs4503203	[Q] KOG0156 Cytochrome P450 CYP2 subfamily	sp|Q4WAW8|FTME_ASPFU	Fumitremorgin C synthase OS=Neosartorya fumigata (strain ATCC MYA-4609 / Af293 / CBS 101355 / FGSC A1100) GN=ftmP450-2 PE=3 SV=1	GO:0020037 ;GO:0016705 ;GO:0004497 ;GO:0005506 ;GO:0055114	CYP2	CYP2
Zoff093653	A	948	6.31	0	1	0	0	0	0	0	0	0	1	0	0.31	0	0.05	0	0	0	0	0	0	0	0.05	0	0.12	0	0	0.0166667	gi|470517645|ref|XP_004353227.1|	sterol C22 desaturase -like, putative [Acanthamoeba castellanii str. Neff]	ppp:PHYPADRAFT_154853	hypothetical protein	At2g34490	[QI] KOG0157 Cytochrome P450 CYP4/CYP19/CYP26 subfamilies	sp|O64698|C7102_ARATH	Cytochrome P450 710A2 OS=Arabidopsis thaliana GN=CYP710A2 PE=2 SV=1	--	CYP710A	CYP710
Zoff093654	A	1467	5.69	1	10	1	0	0	0	0	0	0	0	0	0.28	0.06	0.5	0.05	0	0	0	0	0	0	0	0	0.28	0.0166667	0	0	gi|470517645|ref|XP_004353227.1|	sterol C22 desaturase -like, putative [Acanthamoeba castellanii str. Neff]	ppp:PHYPADRAFT_204792	hypothetical protein; K09832 cytochrome P450, family 710, subfamily A	At2g34500	[QI] KOG0157 Cytochrome P450 CYP4/CYP19/CYP26 subfamilies	sp|Q55EK2|C524A_DICDI	Probable cytochrome P450 524A1 OS=Dictyostelium discoideum GN=cyp524A1 PE=3 SV=1	--	CYP710A	CYP710
Zoff093715	A	1019	2	0	18	0	0	0	0	0	0	2	0	0	0.1	0	0.89	0	0	0	0	0	0	0.1	0	0	0.33	0	0	0.0333333	gi|628355726|ref|XP_007752174.1|	cytochrome P450 oxidoreductase [Cladophialophora psammophila CBS 110553]	pan:PODANSg09289	hypothetical protein	Hs4503203	[Q] KOG0156 Cytochrome P450 CYP2 subfamily	sp|B8NHY4|ORDA_ASPFN	O-methylsterigmatocystin oxidoreductase OS=Aspergillus flavus (strain ATCC 200026 / FGSC A1120 / NRRL 3357 / JCM 12722 / SRRC 167) GN=ordA PE=2 SV=1	GO:0020037 ;GO:0016705 ;GO:0004497 ;GO:0005506 ;GO:0055114	CYP2U	CYP2
Zoff093893	B	372	2.16	0	8.27	92.32	10.7	61.36	6	0	0.94	11.37	1.43	8.86	0.11	0	0.41	4.68	0.55	3.03	0.3	0	0.05	0.57	0.07	0.45	0.173333	2.75333	0.116667	0.363333	gi|403399730|sp|E3W9C4.1|C71A1_ZINZE	RecName: Full=Alpha-humulene 10-hydroxylase [Zingiber zerumbet]	vvi:100254557	hypothetical protein LOC100254557	At4g13310	[Q] KOG0156 Cytochrome P450 CYP2 subfamily	sp|E3W9C4|C71A1_ZINZE	Alpha-humulene 10-hydroxylase OS=Zingiber zerumbet GN=CYP71BA1 PE=1 SV=1	GO:0016491 ;GO:0005488	CYP71B	CYP71
Zoff093895	B	372	0	0	0	10.68	3.22	14.62	0	0	0	3.11	0	1.19	0	0	0	0.54	0.17	0.72	0	0	0	0.16	0	0.06	0	0.476667	0	0.0733333	gi|403399730|sp|E3W9C4.1|C71A1_ZINZE	RecName: Full=Alpha-humulene 10-hydroxylase [Zingiber zerumbet]	vvi:100254557	hypothetical protein LOC100254557	At4g13310	[Q] KOG0156 Cytochrome P450 CYP2 subfamily	sp|E3W9C4|C71A1_ZINZE	Alpha-humulene 10-hydroxylase OS=Zingiber zerumbet GN=CYP71BA1 PE=1 SV=1	GO:0016491 ;GO:0005488	CYP71B	CYP71
Zoff093896	B	372	24.84	8	4.73	26.01	16.08	8.02	9	92	18.06	10.44	8.57	10.95	1.22	0.46	0.23	1.32	0.83	0.4	0.44	4.61	0.89	0.53	0.42	0.55	0.636667	0.85	1.98	0.5	gi|403399730|sp|E3W9C4.1|C71A1_ZINZE	RecName: Full=Alpha-humulene 10-hydroxylase [Zingiber zerumbet]	rcu:RCOM_1574220	cytochrome P450, putative (EC:1.14.13.68)	At4g13310	[Q] KOG0156 Cytochrome P450 CYP2 subfamily	sp|E3W9C4|C71A1_ZINZE	Alpha-humulene 10-hydroxylase OS=Zingiber zerumbet GN=CYP71BA1 PE=1 SV=1	GO:0016491 ;GO:0005488	CYP71B	CYP71
Zoff094016	A	539	4	0	0	1	1	0	0	0	0	0	1	0	0.2	0	0	0.05	0.05	0	0	0	0	0	0.05	0	0.0666667	0.0333333	0	0.0166667	gi|443923310|gb|ELU42570.1|	cytochrome P450 hydroxylase [Rhizoctonia solani AG-1 IA]	ppl:POSPLDRAFT_97538	hypothetical protein	7304053	[QI] KOG0157 Cytochrome P450 CYP4/CYP19/CYP26 subfamilies	sp|Q9V4T3|C4AD1_DROME	Probable cytochrome P450 4ad1 OS=Drosophila melanogaster GN=Cyp4ad1 PE=2 SV=1	GO:0046872 ;GO:0016491	CYP4C	CYP4
Zoff094800	B	507	0	0	0	3	0	1	0	0	0	0	0	0	0	0	0	0.15	0	0.05	0	0	0	0	0	0	0	0.0666667	0	0	gi|695445929|ref|XP_009534353.1|	hypothetical protein PHYSODRAFT_564149 [Phytophthora sojae]	pif:PITG_07699	cytochrome P450, putative	At2g44890	[QI] KOG0157 Cytochrome P450 CYP4/CYP19/CYP26 subfamilies	sp|O81117|C94A1_VICSA	Cytochrome P450 94A1 OS=Vicia sativa GN=CYP94A1 PE=2 SV=2	GO:0046872 ;GO:0016491	CYP94A	CYP94
Zoff094802	B	1202	0	0	0	1	0	21	0	0	0	0	0	0	0	0	0	0.05	0	1.04	0	0	0	0	0	0	0	0.363333	0	0	gi|695446243|ref|XP_009534432.1|	hypothetical protein PHYSODRAFT_318246 [Phytophthora sojae]	pif:PITG_07722	cytochrome P450, putative	At2g44890	[QI] KOG0157 Cytochrome P450 CYP4/CYP19/CYP26 subfamilies	sp|Q9FMY1|C86B1_ARATH	Cytochrome P450 86B1 OS=Arabidopsis thaliana GN=CYP86B1 PE=2 SV=1	GO:0016491 ;GO:0005488	CYP86B	CYP86
Zoff094869	C	987	0	0	0	0	0	0	0	1	0	0	0	16	0	0	0	0	0	0	0	0.05	0	0	0	0.81	0	0	0.0166667	0.27	gi|299743583|ref|XP_002910681.1|	cytochrome P450 oxidoreductase [Coprinopsis cinerea okayama7#130]	cci:CC1G_15012	cytochrome P450 oxidoreductase; K00327 NADPH-ferrihemoprotein reductase [EC:1.6.2.4]	YHR042w	[C] KOG1158 NADP/FAD dependent oxidoreductase	sp|Q9HDG2|NCPR_PHACH	NADPH--cytochrome P450 reductase OS=Phanerochaete chrysosporium GN=CPR PE=2 SV=1	GO:0005506 ;GO:0003958 ;GO:0055114 ;GO:0010181	CYP	CYP
Zoff094892	B	437	0	1	1	0	0	0	0	0	0	0	0	0	0	0.06	0.05	0	0	0	0	0	0	0	0	0	0.0366667	0	0	0	gi|302406837|ref|XP_003001254.1|	NADPH-cytochrome P450 reductase [Verticillium alfalfae VaMs.102]	ncr:NCU09741	NADPH-cytochrome P450 reductase; K00327 NADPH-ferrihemoprotein reductase [EC:1.6.2.4]	Hs22049499	[C] KOG1158 NADP/FAD dependent oxidoreductase	sp|Q4WM67|NCPR_ASPFU	NADPH--cytochrome P450 reductase OS=Neosartorya fumigata (strain ATCC MYA-4609 / Af293 / CBS 101355 / FGSC A1100) GN=cprA PE=1 SV=1	GO:0005789 ;GO:0003958 ;GO:0005506 ;GO:0010181 ;GO:0055114	CYP	CYP
Zoff094893	B	437	0	0	0	0	0	0	0	0	0	1	0	0	0	0	0	0	0	0	0	0	0	0.05	0	0	0	0	0	0.0166667	gi|302406837|ref|XP_003001254.1|	NADPH-cytochrome P450 reductase [Verticillium alfalfae VaMs.102]	ncr:NCU09741	NADPH-cytochrome P450 reductase; K00327 NADPH-ferrihemoprotein reductase [EC:1.6.2.4]	Hs22049499	[C] KOG1158 NADP/FAD dependent oxidoreductase	sp|Q4WM67|NCPR_ASPFU	NADPH--cytochrome P450 reductase OS=Neosartorya fumigata (strain ATCC MYA-4609 / Af293 / CBS 101355 / FGSC A1100) GN=cprA PE=1 SV=1	GO:0005789 ;GO:0003958 ;GO:0005506 ;GO:0010181 ;GO:0055114	CYP	CYP
Zoff098342	A	535	13	5	4	0	0	1	0	19	1	2	2	3	0.64	0.29	0.2	0	0	0.05	0	0.95	0.05	0.1	0.1	0.15	0.376667	0.0166667	0.333333	0.116667	gi|695051629|ref|XP_009413846.1|	PREDICTED: cytochrome P450 710A1-like [Musa acuminata subsp. malaccensis]	sbi:SORBI_03g002060	hypothetical protein; K09832 cytochrome P450, family 710, subfamily A	At2g34500	[QI] KOG0157 Cytochrome P450 CYP4/CYP19/CYP26 subfamilies	sp|O64697|C7101_ARATH	Cytochrome P450 710A1 OS=Arabidopsis thaliana GN=CYP710A1 PE=1 SV=1	GO:0055114 ;GO:0004497 ;GO:0019375 ;GO:0019825 ;GO:0042631 ;GO:0020037 ;GO:0010583 ;GO:0005576 ;GO:0009407 ;GO:0016036 ;GO:0000249 ;GO:0005506 ;GO:0019745 ;GO:0016126 ;GO:0055114 ;GO:0004497 ;GO:0019375 ;GO:0019825 ;GO:0042631 ;GO:0020037 ;GO:0010583 ;GO:0005576 ;GO:0009407 ;GO:0016036 ;GO:0000249 ;GO:0005506 ;GO:0019745 ;GO:0016126	CYP710A	CYP710
Zoff098792	A	396	0	0	0	0	0	1	0	0	0	0	0	6	0	0	0	0	0	0.05	0	0	0	0	0	0.3	0	0.0166667	0	0.1	--	--	--	--	7293040	[QI] KOG0157 Cytochrome P450 CYP4/CYP19/CYP26 subfamilies	--	--	--	CYP3A	CYP3
Zoff099912	A	1605	1	0	32	0	0	0	0	1	0	0	0	0	0.05	0	1.59	0	0	0	0	0.05	0	0	0	0	0.546667	0	0.0166667	0	gi|628349120|ref|XP_007750072.1|	hypothetical protein A1O5_11310 [Cladophialophora psammophila CBS 110553]	nfi:NFIA_047320	Cytochrome P450 oxidoreductase, putative	At4g13770	[Q] KOG0156 Cytochrome P450 CYP2 subfamily	sp|Q4WAW8|FTME_ASPFU	Fumitremorgin C synthase OS=Neosartorya fumigata (strain ATCC MYA-4609 / Af293 / CBS 101355 / FGSC A1100) GN=ftmP450-2 PE=3 SV=1	GO:0020037 ;GO:0016705 ;GO:0004497 ;GO:0005506 ;GO:0055114	CYP2	CYP2
Zoff101589	C	364	0	0	4	2	2	2	3	1	2	2	3	1	0	0	0.2	0.1	0.1	0.1	0.15	0.05	0.1	0.1	0.15	0.05	0.0666667	0.1	0.1	0.1	gi|720006476|ref|XP_010257993.1|	PREDICTED: cytochrome P450 78A5 [Nelumbo nucifera]	vvi:100249034	hypothetical protein LOC100249034	At1g74110	[Q] KOG0156 Cytochrome P450 CYP2 subfamily	sp|Q9LMX7|C78A5_ARATH	Cytochrome P450 78A5 OS=Arabidopsis thaliana GN=CYP78A5 PE=2 SV=1	GO:0048437 ;GO:0016021 ;GO:0010338 ;GO:0055114 ;GO:0033772 ;GO:0010075 ;GO:0009055 ;GO:0046622 ;GO:0040009 ;GO:0020037 ;GO:0008284 ;GO:0005506 ;GO:0005783	CYP78A	CYP78
Zoff102545	B	319	0	1	0	1.33	0	0	1	0	0	0	0	0	0	0.06	0	0.07	0	0	0.05	0	0	0	0	0	0.02	0.0233333	0.0166667	0	gi|357114113|ref|XP_003558845.1|	PREDICTED: cytochrome P450 86B1-like [Brachypodium distachyon]	sbi:SORBI_01g047630	hypothetical protein	At5g23190	[QI] KOG0157 Cytochrome P450 CYP4/CYP19/CYP26 subfamilies	sp|Q9FMY1|C86B1_ARATH	Cytochrome P450 86B1 OS=Arabidopsis thaliana GN=CYP86B1 PE=2 SV=1	GO:0046872 ;GO:0016491 ;GO:0016023	CYP86B	CYP86
Zoff102546	B	319	0	0	0	1.33	0	0	0	0	0	0	0	0	0	0	0	0.07	0	0	0	0	0	0	0	0	0	0.0233333	0	0	gi|357114113|ref|XP_003558845.1|	PREDICTED: cytochrome P450 86B1-like [Brachypodium distachyon]	sbi:SORBI_01g047630	hypothetical protein	At5g23190	[QI] KOG0157 Cytochrome P450 CYP4/CYP19/CYP26 subfamilies	sp|Q9FMY1|C86B1_ARATH	Cytochrome P450 86B1 OS=Arabidopsis thaliana GN=CYP86B1 PE=2 SV=1	GO:0046872 ;GO:0016491 ;GO:0016023	CYP86B	CYP86
Zoff102547	B	319	12	2	3	1.33	6	2	5.99	9.99	6.99	2	6	4	0.59	0.11	0.15	0.07	0.31	0.1	0.29	0.5	0.35	0.1	0.3	0.2	0.283333	0.16	0.38	0.2	gi|357114113|ref|XP_003558845.1|	PREDICTED: cytochrome P450 86B1-like [Brachypodium distachyon]	sbi:SORBI_01g047630	hypothetical protein	At5g23190	[QI] KOG0157 Cytochrome P450 CYP4/CYP19/CYP26 subfamilies	sp|Q9FMY1|C86B1_ARATH	Cytochrome P450 86B1 OS=Arabidopsis thaliana GN=CYP86B1 PE=2 SV=1	GO:0046872 ;GO:0016491 ;GO:0016023	CYP86B	CYP86
Zoff103217	D	359	22	27	21	2	3	2	16.64	74.33	17.59	20	28	3	1.08	1.55	1.04	0.1	0.16	0.1	0.82	3.72	0.87	1.01	1.39	0.15	1.22333	0.12	1.80333	0.85	gi|695072967|ref|XP_009383632.1|	PREDICTED: cytochrome P450 71A1-like [Musa acuminata subsp. malaccensis]	osa:4344445	Os08g0105400	At3g26830	[Q] KOG0156 Cytochrome P450 CYP2 subfamily	sp|P24465|C71A1_PERAE	Cytochrome P450 71A1 OS=Persea americana GN=CYP71A1 PE=1 SV=2	GO:0046872 ;GO:0016491 ;GO:0016301 ;GO:1901363 ;GO:0008152 ;GO:0097159	CYP71A	CYP71
Zoff103218	D	359	5	9	24	0	1	1	20	74	12.41	17	29	7	0.25	0.52	1.19	0	0.05	0.05	0.98	3.71	0.61	0.86	1.44	0.35	0.653333	0.0333333	1.76667	0.883333	gi|695072967|ref|XP_009383632.1|	PREDICTED: cytochrome P450 71A1-like [Musa acuminata subsp. malaccensis]	osa:4344445	Os08g0105400	At3g26830	[Q] KOG0156 Cytochrome P450 CYP2 subfamily	sp|P24465|C71A1_PERAE	Cytochrome P450 71A1 OS=Persea americana GN=CYP71A1 PE=1 SV=2	GO:0046872 ;GO:0016491 ;GO:0016023	CYP71A	CYP71
Zoff105837	B	883	5	0	0	6	1	2	0	0	0	0	0	0	0.25	0	0	0.3	0.05	0.1	0	0	0	0	0	0	0.0833333	0.15	0	0	gi|443919685|gb|ELU39786.1|	putative cytochrome P450 [Rhizoctonia solani AG-1 IA]	afv:AFLA_042660	cytochrome P450, putative	Hs13787189	[Q] KOG0156 Cytochrome P450 CYP2 subfamily	sp|B8NHY4|ORDA_ASPFN	O-methylsterigmatocystin oxidoreductase OS=Aspergillus flavus (strain ATCC 200026 / FGSC A1120 / NRRL 3357 / JCM 12722 / SRRC 167) GN=ordA PE=2 SV=1	GO:0020037 ;GO:0016705 ;GO:0004497 ;GO:0005506 ;GO:0055114	CYP	CYP
Zoff107087	B	948	12	10	7	12	8	13	10	48	6	4	3	28	0.59	0.57	0.35	0.61	0.41	0.64	0.49	2.41	0.3	0.2	0.15	1.41	0.503333	0.553333	1.06667	0.586667	gi|695014951|ref|XP_009394321.1|	PREDICTED: flavonoid 3'-monooxygenase [Musa acuminata subsp. malaccensis]	osa:4348304	Os10g0320100; K05280 flavonoid 3'-monooxygenase [EC:1.14.13.21]	At5g07990	[Q] KOG0156 Cytochrome P450 CYP2 subfamily	sp|Q9SD85|F3PH_ARATH	Flavonoid 3'-monooxygenase OS=Arabidopsis thaliana GN=CYP75B1 PE=1 SV=1	GO:0009744 ;GO:0010224 ;GO:0016711 ;GO:0009718 ;GO:0005506 ;GO:0020037 ;GO:0005576 ;GO:0019825 ;GO:0009733 ;GO:0055114	CYP75B	CYP75
Zoff108368	A	894	4	1	5	0	0	0	0	0	0	0	0	0	0.2	0.06	0.25	0	0	0	0	0	0	0	0	0	0.17	0	0	0	gi|656912796|gb|KEF58378.1|	hypothetical protein A1O9_06304 [Exophiala aquamarina CBS 119918]	pan:PODANSg7745	hypothetical protein	At3g28740	[Q] KOG0156 Cytochrome P450 CYP2 subfamily	sp|Q9LHA1|C8D11_ARATH	Cytochrome P450 81D11 OS=Arabidopsis thaliana GN=CYP81D11 PE=2 SV=1	GO:0020037 ;GO:0016705 ;GO:0004497 ;GO:0005506 ;GO:0055114	CYP81D	CYP81
Zoff108370	A	605	1	0	1	0	0	0	0	0	0	0	0	0	0.05	0	0.05	0	0	0	0	0	0	0	0	0	0.0333333	0	0	0	gi|656912796|gb|KEF58378.1|	hypothetical protein A1O9_06304 [Exophiala aquamarina CBS 119918]	act:ACLA_093630	Cytochrome P450 oxidoreductase, putative	Hs4503203	[Q] KOG0156 Cytochrome P450 CYP2 subfamily	sp|Q4WAW8|FTME_ASPFU	Fumitremorgin C synthase OS=Neosartorya fumigata (strain ATCC MYA-4609 / Af293 / CBS 101355 / FGSC A1100) GN=ftmP450-2 PE=3 SV=1	GO:0020037 ;GO:0016705 ;GO:0004497 ;GO:0005506 ;GO:0055114	CYP2	CYP2
Zoff109309	A	458	0	0	0	0	0	0	5	0	1	0	0	0	0	0	0	0	0	0	0.25	0	0.05	0	0	0	0	0	0.1	0	gi|576981837|gb|EUC54580.1|	cytochrome P450 family protein [Rhizoctonia solani AG-3 Rhs1AP]	ppl:POSPLDRAFT_93354	hypothetical protein	--	--	sp|Q43078|C97B1_PEA	Cytochrome P450 97B1, chloroplastic OS=Pisum sativum GN=CYP97B1 PE=2 SV=1	GO:0020037 ;GO:0016705 ;GO:0004497 ;GO:0005506 ;GO:0055114	CYP97B	CYP97
Zoff109431	A	1118	0	0	0	0	0	0	0	0	0	0	0	23	0	0	0	0	0	0	0	0	0	0	0	1.16	0	0	0	0.386667	gi|470260554|ref|XP_004360144.1|	cytochrome P450 family protein [Dictyostelium fasciculatum]	ddi:DDB_G0279403	CYP51; cytochrome P450 family protein; K05917 cytochrome P450, family 51 (sterol 14-demethylase) [EC:1.14.13.70]	At1g11680	[Q] KOG0684 Cytochrome P450	sp|Q1ZXH9|CP51_DICDI	Probable lanosterol 14-alpha demethylase OS=Dictyostelium discoideum GN=cyp51 PE=3 SV=1	GO:0006629 ;GO:1901576 ;GO:0046872 ;GO:0016705 ;GO:0004497 ;GO:0044711 ;GO:1901360	CYP51	CYP51
Zoff109432	A	416	0	0	0	0	0	0	0	0	0	0	0	6	0	0	0	0	0	0	0	0	0	0	0	0.3	0	0	0	0.1	gi|330793567|ref|XP_003284855.1|	cytochrome P450 family protein [Dictyostelium purpureum]	ddi:DDB_G0279403	CYP51; cytochrome P450 family protein; K05917 cytochrome P450, family 51 (sterol 14-demethylase) [EC:1.14.13.70]	At1g11680	[Q] KOG0684 Cytochrome P450	sp|Q1ZXH9|CP51_DICDI	Probable lanosterol 14-alpha demethylase OS=Dictyostelium discoideum GN=cyp51 PE=3 SV=1	GO:0006629 ;GO:1901576 ;GO:0005488 ;GO:0016491 ;GO:0044711 ;GO:1901360	CYP51	CYP51
Zoff110346	C	720	269.12	187.93	424.03	163.13	131.4	143.38	244.98	295.77	305.73	514.03	193.6	262.05	13.25	10.79	21.04	8.28	6.8	7.09	12.06	14.82	15.09	25.99	9.59	13.2	15.0267	7.39	13.99	16.26	gi|672181252|ref|XP_008810838.1|	PREDICTED: trans-cinnamate 4-monooxygenase-like [Phoenix dactylifera]	pop:POPTR_823837	C4H2, CYP73A42; cytochrome P450 cinnamate 4-hydroxylase (EC:1.14.13.11); K00487 trans-cinnamate 4-monooxygenase [EC:1.14.13.11]	At2g30490	[Q] KOG0156 Cytochrome P450 CYP2 subfamily	sp|Q04468|TCMO_HELTU	Trans-cinnamate 4-monooxygenase OS=Helianthus tuberosus GN=CYP73A1 PE=1 SV=1	GO:0020037 ;GO:0016710 ;GO:0005506 ;GO:0055114	CYP73A	CYP73
Zoff110807	D	481	0	0	0	0	1	2	0	0	0	0	0	0	0	0	0	0	0.05	0.1	0	0	0	0	0	0	0	0.05	0	0	gi|326514526|dbj|BAJ96250.1|	predicted protein [Hordeum vulgare subsp. vulgare]	zma:100281181	flavonoid 3-monooxygenase	At4g12310	[Q] KOG0156 Cytochrome P450 CYP2 subfamily	sp|O81973|C93A3_SOYBN	Cytochrome P450 93A3 OS=Glycine max GN=CYP93A3 PE=2 SV=1	GO:0020037 ;GO:0016705 ;GO:0004497 ;GO:0005506 ;GO:0055114	CYP93A	CYP93
Zoff110808	D	481	3	0	0	0	0	0	0	0	0	0	0	2	0.15	0	0	0	0	0	0	0	0	0	0	0.1	0.05	0	0	0.0333333	gi|326514526|dbj|BAJ96250.1|	predicted protein [Hordeum vulgare subsp. vulgare]	sbi:SORBI_02g025840	hypothetical protein	At4g12310	[Q] KOG0156 Cytochrome P450 CYP2 subfamily	sp|O81973|C93A3_SOYBN	Cytochrome P450 93A3 OS=Glycine max GN=CYP93A3 PE=2 SV=1	GO:0046872 ;GO:0016491	CYP93A	CYP93
Zoff111172	B	356	0	0.88	0	1	0	0	0	3	0	0	0	0	0	0.05	0	0.05	0	0	0	0.15	0	0	0	0	0.0166667	0.0166667	0.05	0	gi|695027195|ref|XP_009400927.1|	PREDICTED: cytochrome P450 86B1-like [Musa acuminata subsp. malaccensis]	vvi:100250831	hypothetical protein LOC100250831	At4g39480	[QI] KOG0157 Cytochrome P450 CYP4/CYP19/CYP26 subfamilies	sp|Q9FMY1|C86B1_ARATH	Cytochrome P450 86B1 OS=Arabidopsis thaliana GN=CYP86B1 PE=2 SV=1	GO:0020037 ;GO:0016705 ;GO:0004497 ;GO:0005506 ;GO:0055114	CYP86B	CYP86
Zoff111173	B	356	2	3.12	1	0	9	2	6	4	4	4	5	2	0.1	0.18	0.05	0	0.47	0.1	0.3	0.2	0.2	0.2	0.25	0.1	0.11	0.19	0.233333	0.183333	gi|695027195|ref|XP_009400927.1|	PREDICTED: cytochrome P450 86B1-like [Musa acuminata subsp. malaccensis]	vvi:100250831	hypothetical protein LOC100250831	At4g39480	[QI] KOG0157 Cytochrome P450 CYP4/CYP19/CYP26 subfamilies	sp|Q9FMY1|C86B1_ARATH	Cytochrome P450 86B1 OS=Arabidopsis thaliana GN=CYP86B1 PE=2 SV=1	GO:0016023 ;GO:0009055 ;GO:0004497 ;GO:0005506 ;GO:0020037 ;GO:0016705 ;GO:0055114	CYP86B	CYP86
Zoff111912	C	592	4	0	0	0	0	0	1	0	0	0	0	0	0.2	0	0	0	0	0	0.05	0	0	0	0	0	0.0666667	0	0.0166667	0	gi|493382017|ref|WP_006338274.1|	cytochrome P450 [Gordonia rhizosphera]	rme:Rmet_3467	putative bifunctional P-450:NADPH-P450 reductase 2 (EC:1.6.2.4 1.14.14.1); K14338 cytochrome P450 / NADPH-cytochrome P450 reductase [EC:1.14.14.1 1.6.2.4]	At2g44890	[QI] KOG0157 Cytochrome P450 CYP4/CYP19/CYP26 subfamilies	sp|Q9PVE8|C330_FUNHE	Cytochrome P450 3A30 OS=Fundulus heteroclitus GN=cyp3a30 PE=2 SV=2	GO:0016491	CYP4F	CYP4
Zoff111913	C	592	0	1	0	0	0	0	0	0	0	0	0	8	0	0.06	0	0	0	0	0	0	0	0	0	0.4	0.02	0	0	0.133333	gi|518492905|ref|WP_019663112.1|	MULTISPECIES: hypothetical protein [Rhodococcus]	hau:Haur_5257	cytochrome P450	At2g44890	[QI] KOG0157 Cytochrome P450 CYP4/CYP19/CYP26 subfamilies	sp|P9WPN3|CP132_MYCTU	Putative cytochrome P450 132 OS=Mycobacterium tuberculosis (strain ATCC 25618 / H37Rv) GN=cyp132 PE=1 SV=1	--	CYP4F	CYP4
Zoff112331	A	2174	0	0	9	0	0	0	3.1	9.62	0	0	0	0	0	0	0.45	0	0	0	0.15	0.48	0	0	0	0	0.15	0	0.21	0	gi|628263966|ref|XP_007730348.1|	hypothetical protein A1O3_02015 [Capronia epimyces CBS 606.96]	nfi:NFIA_047320	Cytochrome P450 oxidoreductase, putative	At4g37330	[Q] KOG0156 Cytochrome P450 CYP2 subfamily	sp|O13345|ORDA_ASPPA	O-methylsterigmatocystin oxidoreductase OS=Aspergillus parasiticus GN=ordA PE=1 SV=1	GO:0020037 ;GO:0016705 ;GO:0005506 ;GO:0055114	CYP2D	CYP2
Zoff112332	A	2122	29	23	0	1	0	4	9.9	25.38	35	1	0	2	1.43	1.32	0	0.05	0	0.2	0.49	1.27	1.73	0.05	0	0.1	0.916667	0.0833333	1.16333	0.05	gi|628263966|ref|XP_007730348.1|	hypothetical protein A1O3_02015 [Capronia epimyces CBS 606.96]	nfi:NFIA_047320	Cytochrome P450 oxidoreductase, putative	At2g45550	[Q] KOG0156 Cytochrome P450 CYP2 subfamily	sp|Q4WAW8|FTME_ASPFU	Fumitremorgin C synthase OS=Neosartorya fumigata (strain ATCC MYA-4609 / Af293 / CBS 101355 / FGSC A1100) GN=ftmP450-2 PE=3 SV=1	GO:0020037 ;GO:0016705 ;GO:0005506 ;GO:0055114	CYP2	CYP2
Zoff113479	A	1535	4	1	0	0	0	0	9	2	3	2	0	0	0.2	0.06	0	0	0	0	0.44	0.1	0.15	0.1	0	0	0.0866667	0	0.23	0.0333333	gi|695067090|ref|XP_009380454.1|	PREDICTED: cytochrome P450 711A1 [Musa acuminata subsp. malaccensis]	vvi:100243924	hypothetical protein LOC100243924	At2g26170	[Q] KOG0158 Cytochrome P450 CYP3/CYP5/CYP6/CYP9 subfamilies	sp|B9DFU2|MAX1_ARATH	Cytochrome P450 711A1 OS=Arabidopsis thaliana GN=CYP711A1 PE=2 SV=1	GO:0009934 ;GO:0009611 ;GO:0016117 ;GO:0009805 ;GO:0010363 ;GO:0020037 ;GO:0009055 ;GO:0006612 ;GO:0016705 ;GO:0004497 ;GO:0005506 ;GO:0016021 ;GO:0009926 ;GO:0010223 ;GO:0055114	CYP711A	CYP711
Zoff114154	C	1098	0	1	4	5	0	0	0	0	3	9	0	0	0	0.06	0.2	0.25	0	0	0	0	0.15	0.46	0	0	0.0866667	0.0833333	0.05	0.153333	gi|302422486|ref|XP_003009073.1|	cytochrome P450 61 [Verticillium alfalfae VaMs.102]	ang:ANI_1_446094	An11g03230; cytochrome P450 61	YMR015c	[QI] KOG0157 Cytochrome P450 CYP4/CYP19/CYP26 subfamilies	sp|P54781|ERG5_YEAST	Cytochrome P450 61 OS=Saccharomyces cerevisiae (strain ATCC 204508 / S288c) GN=ERG5 PE=1 SV=1	GO:0020037 ;GO:0016705 ;GO:0004497 ;GO:0005506 ;GO:0055114	CYP61	CYP61
Zoff114427	D	875	8	1	0	7	0	2	2	4	1	0	0	0	0.39	0.06	0	0.36	0	0.1	0.1	0.2	0.05	0	0	0	0.15	0.153333	0.116667	0	gi|656907438|gb|KEF53176.1|	cytochrome P450 oxidoreductase [Exophiala aquamarina CBS 119918]	ssl:SS1G_00445	hypothetical protein	SPAC19G12.08	[I] KOG0539 Sphingolipid fatty acid hydroxylase	sp|Q03529|SCS7_YEAST	Ceramide very long chain fatty acid hydroxylase SCS7 OS=Saccharomyces cerevisiae (strain ATCC 204508 / S288c) GN=SCS7 PE=1 SV=1	GO:0006633 ;GO:0006665 ;GO:0016491 ;GO:0005506 ;GO:0020037 ;GO:0005783 ;GO:0055114	CYP	CYP
Zoff114618	C	445	1.12	0	3.37	3.06	2.25	3.14	0	0	0	3	0	0	0.06	0	0.17	0.16	0.12	0.16	0	0	0	0.15	0	0	0.0766667	0.146667	0	0.05	gi|695010775|ref|XP_009392073.1|	PREDICTED: cytochrome P450 71A1-like [Musa acuminata subsp. malaccensis]	vvi:100260959	hypothetical protein LOC100260959	At4g31500	[Q] KOG0156 Cytochrome P450 CYP2 subfamily	sp|O65782|C83B1_ARATH	Cytochrome P450 83B1 OS=Arabidopsis thaliana GN=CYP83B1 PE=1 SV=1	GO:0016491 ;GO:0005488	CYP83B	CYP83
Zoff114619	C	445	3.88	0	6.63	46.97	6.75	40.86	6.99	3	3	5	8	6.37	0.19	0	0.33	2.38	0.35	2.02	0.34	0.15	0.15	0.25	0.4	0.32	0.173333	1.58333	0.213333	0.323333	gi|695010775|ref|XP_009392073.1|	PREDICTED: cytochrome P450 71A1-like [Musa acuminata subsp. malaccensis]	vvi:100260959	hypothetical protein LOC100260959	At4g31500	[Q] KOG0156 Cytochrome P450 CYP2 subfamily	sp|O65782|C83B1_ARATH	Cytochrome P450 83B1 OS=Arabidopsis thaliana GN=CYP83B1 PE=1 SV=1	GO:0016491 ;GO:0005488	CYP83B	CYP83
Zoff114631	B	603	10	12	6	0	42	54	17	48	0	3	6	1	0.49	0.69	0.3	0	2.17	2.67	0.84	2.41	0	0.15	0.3	0.05	0.493333	1.61333	1.08333	0.166667	gi|694995451|ref|XP_009388744.1|	PREDICTED: cytochrome P450 78A5-like [Musa acuminata subsp. malaccensis]	vvi:100253660	hypothetical protein LOC100253660	At1g13710	[Q] KOG0156 Cytochrome P450 CYP2 subfamily	sp|Q9LMX7|C78A5_ARATH	Cytochrome P450 78A5 OS=Arabidopsis thaliana GN=CYP78A5 PE=2 SV=1	GO:0016491 ;GO:0005488	CYP78A	CYP78
Zoff114865	A	2091	110	122	118	91	107	91	154	211	129	121	134	100	5.41	7.01	5.85	4.62	5.53	4.5	7.58	10.57	6.37	6.12	6.64	5.04	6.09	4.88333	8.17333	5.93333	gi|695070709|ref|XP_009382395.1|	PREDICTED: carotene epsilon-monooxygenase, chloroplastic isoform X2 [Musa acuminata subsp. malaccensis]	vvi:100243621	hypothetical protein LOC100243621; K09837 carotenoid epsilon-ring hydroxylase	At3g53130	[QI] KOG0157 Cytochrome P450 CYP4/CYP19/CYP26 subfamilies	sp|Q6TBX7|LUT1_ARATH	Carotene epsilon-monooxygenase, chloroplastic OS=Arabidopsis thaliana GN=CYP97C1 PE=1 SV=1	GO:0010103 ;GO:0016117 ;GO:0006636 ;GO:0005840 ;GO:0006412 ;GO:0020037 ;GO:0009055 ;GO:0016556 ;GO:0015995 ;GO:0019288 ;GO:0009965 ;GO:0005506 ;GO:0030154 ;GO:0003735 ;GO:0031969 ;GO:0055114 ;GO:0009974 ;GO:0010103 ;GO:0016117 ;GO:0006636 ;GO:0005840 ;GO:0006412 ;GO:0020037 ;GO:0009055 ;GO:0016556 ;GO:0015995 ;GO:0019288 ;GO:0009965 ;GO:0005506 ;GO:0030154 ;GO:0003735 ;GO:0031969 ;GO:0055114 ;GO:…	CYP97C	CYP97
Zoff114898	B	392	3	3	2	0	1	0	1	3	7	0	4	2	0.15	0.17	0.1	0	0.05	0	0.05	0.15	0.35	0	0.2	0.1	0.14	0.0166667	0.183333	0.1	gi|125552400|gb|EAY98109.1|	hypothetical protein OsI_20026 [Oryza sativa Indica Group]	osa:4338845	Os05g0424300	At3g26230	[Q] KOG0156 Cytochrome P450 CYP2 subfamily	sp|Q9LTL8|C71BO_ARATH	Cytochrome P450 71B24 OS=Arabidopsis thaliana GN=CYP71B24 PE=2 SV=1	GO:0020037 ;GO:0016705 ;GO:0004497 ;GO:0005506 ;GO:0055114	CYP71B	CYP71
Zoff115662	A	974	2	0	0	0	0	0	0	0	0	0	0	8	0.1	0	0	0	0	0	0	0	0	0	0	0.4	0.0333333	0	0	0.133333	gi|196005625|ref|XP_002112679.1|	hypothetical protein TRIADDRAFT_25487 [Trichoplax adhaerens]	tad:TRIADDRAFT_25487	hypothetical protein	Hs4503211	[Q] KOG0159 Cytochrome P450 CYP11/CYP12/CYP24/CYP27 subfamilies	sp|Q9DBG1|CP27A_MOUSE	Sterol 26-hydroxylase, mitochondrial OS=Mus musculus GN=Cyp27a1 PE=1 SV=1	--	CYP10	CYP10
Zoff117172	A	537	6	0	0	0	0	0	0	0	0	0	1	0	0.3	0	0	0	0	0	0	0	0	0	0.05	0	0.1	0	0	0.0166667	gi|675389734|gb|KFM82631.1|	Cytochrome P450 3A13, partial [Stegodyphus mimosarum]	isc:IscW_ISCW019880	cytochrome P450, putative (EC:1.14.14.1)	7291827	[Q] KOG0158 Cytochrome P450 CYP3/CYP5/CYP6/CYP9 subfamilies	sp|Q64581|CP3AI_RAT	Cytochrome P450 3A18 OS=Rattus norvegicus GN=Cyp3a18 PE=2 SV=1	GO:0016491	CYP3A	CYP3
Zoff117173	D	799	0	0	0	0	0	0	0	0	0	0	0	0	0	0	0	0	0	0	0	0	0	0	0	0	0	0	0	0	gi|242000608|ref|XP_002434947.1|	cytochrome P450, putative [Ixodes scapularis]	isc:IscW_ISCW019198	cytochrome P450, putative (EC:1.14.13.67)	Hs4503233	[Q] KOG0158 Cytochrome P450 CYP3/CYP5/CYP6/CYP9 subfamilies	sp|Q9V4U7|C6A14_DROME	Probable cytochrome P450 6a14 OS=Drosophila melanogaster GN=Cyp6a14 PE=3 SV=2	GO:0016491 ;GO:0005488	CYP3A	CYP3
Zoff117174	D	765	13	0	0	0	0	0	0	0	0	0	0	0	0.64	0	0	0	0	0	0	0	0	0	0	0	0.213333	0	0	0	gi|242000608|ref|XP_002434947.1|	cytochrome P450, putative [Ixodes scapularis]	isc:IscW_ISCW019198	cytochrome P450, putative (EC:1.14.13.67)	Hs4503233	[Q] KOG0158 Cytochrome P450 CYP3/CYP5/CYP6/CYP9 subfamilies	sp|Q9V4U7|C6A14_DROME	Probable cytochrome P450 6a14 OS=Drosophila melanogaster GN=Cyp6a14 PE=3 SV=2	GO:0016491 ;GO:0005488	CYP3A	CYP3
Zoff117175	A	404	4	0	0	1	0	0	0	0	0	0	0	0	0.2	0	0	0.05	0	0	0	0	0	0	0	0	0.0666667	0.0166667	0	0	gi|585711037|ref|XP_006824666.1|	PREDICTED: cytochrome P450 3A8-like [Saccoglossus kowalevskii]	isc:IscW_ISCW022945	cytochrome P450, putative (EC:1.14.13.94)	CE09177	[Q] KOG0158 Cytochrome P450 CYP3/CYP5/CYP6/CYP9 subfamilies	sp|Q04552|CP6B1_PAPPO	Cytochrome P450 6B1 OS=Papilio polyxenes GN=CYP6B1 PE=1 SV=1	GO:0016491	CYP3A	CYP3
Zoff117197	B	662	86	75	107	52	40	40	71	64	62	49	87	33	4.23	4.31	5.31	2.64	2.07	1.98	3.49	3.21	3.06	2.48	4.31	1.66	4.61667	2.23	3.25333	2.81667	gi|694999984|ref|XP_009409655.1|	PREDICTED: cytochrome P450 71A1-like [Musa acuminata subsp. malaccensis]	pop:POPTR_776172	hypothetical protein	At4g13310	[Q] KOG0156 Cytochrome P450 CYP2 subfamily	sp|P37118|C71A2_SOLME	Cytochrome P450 71A2 OS=Solanum melongena GN=CYP71A2 PE=2 SV=1	GO:0016491 ;GO:0005488	CYP71A	CYP71
Zoff117232	B	1626	26	5	3	7	1	2	0	0	0	0	0	0	1.28	0.29	0.15	0.36	0.05	0.1	0	0	0	0	0	0	0.573333	0.17	0	0	gi|660964853|gb|KEP49762.1|	cytochrome P450 family protein [Rhizoctonia solani 123E]	cci:CC1G_11452	cytochrome P450	At4g13770	[Q] KOG0156 Cytochrome P450 CYP2 subfamily	sp|B8NHY4|ORDA_ASPFN	O-methylsterigmatocystin oxidoreductase OS=Aspergillus flavus (strain ATCC 200026 / FGSC A1120 / NRRL 3357 / JCM 12722 / SRRC 167) GN=ordA PE=2 SV=1	GO:0046872 ;GO:0016491	CYP	CYP
Zoff117638	A	1264	0	0	0	0	0	0	0	0	0	18	0	0	0	0	0	0	0	0	0	0	0	0.91	0	0	0	0	0	0.303333	gi|302885828|ref|XP_003041805.1|	hypothetical protein NECHADRAFT_87276 [Nectria haematococca mpVI 77-13-4]	fgr:FG03086.1	hypothetical protein	Hs13435386	[Q] KOG0158 Cytochrome P450 CYP3/CYP5/CYP6/CYP9 subfamilies	sp|Q4WAW5|FTMC_ASPFU	Tryprostatin B 6-hydroxylase OS=Neosartorya fumigata (strain ATCC MYA-4609 / Af293 / CBS 101355 / FGSC A1100) GN=ftmP450-1 PE=3 SV=2	GO:0046872 ;GO:0016491 ;GO:0046872 ;GO:0016491	CYP	CYP
Zoff118483	C	1927	40	10	732	1	8	3	15	20	1	4	1	91	1.97	0.57	36.32	0.05	0.41	0.15	0.74	1	0.05	0.2	0.05	4.58	12.9533	0.203333	0.596667	1.61	gi|656909385|gb|KEF55081.1|	3-hydroxyphenylacetate 6-hydroxylase [Exophiala aquamarina CBS 119918]	ure:UREG_05702	hypothetical protein; K10438 3-hydroxyphenylacetate 6-hydroxylase [EC:1.14.13.63]	Hs4503199	[Q] KOG0156 Cytochrome P450 CYP2 subfamily	sp|Q078T0|PHACB_EMEND	3-hydroxyphenylacetate 6-hydroxylase OS=Emericella nidulans GN=phacB PE=1 SV=1	GO:0020037 ;GO:0016705 ;GO:0004497 ;GO:0005506 ;GO:0055114	CYP2	CYP2
Zoff121359	D	493	1	0	0	0	0	3	0	0	0	0	0	0	0.05	0	0	0	0	0.15	0	0	0	0	0	0	0.0166667	0.05	0	0	gi|641530022|gb|KDO24167.1|	hypothetical protein SPRG_10595 [Saprolegnia parasitica CBS 223.65]	tgu:100228086	hypothetical protein LOC100228086	Hs8922752	[C] KOG1160 Fe-S oxidoreductase	sp|P37201|NCPR_CANTR	NADPH--cytochrome P450 reductase OS=Candida tropicalis GN=NCP1 PE=3 SV=1	--	CYP	CYP
Zoff121361	D	493	1	0	6	0	0	0	0	0	0	0	0	0	0.05	0	0.3	0	0	0	0	0	0	0	0	0	0.116667	0	0	0	gi|641530022|gb|KDO24167.1|	hypothetical protein SPRG_10595 [Saprolegnia parasitica CBS 223.65]	tgu:100228086	hypothetical protein LOC100228086	Hs8922752	[C] KOG1160 Fe-S oxidoreductase	sp|P37201|NCPR_CANTR	NADPH--cytochrome P450 reductase OS=Candida tropicalis GN=NCP1 PE=3 SV=1	--	CYP	CYP
Zoff122577	A	2569	2	8	7	0	0	1	0	1	5	9	2	17	0.1	0.46	0.35	0	0	0.05	0	0.05	0.25	0.46	0.1	0.86	0.303333	0.0166667	0.1	0.473333	gi|598025593|ref|XP_007342169.1|	hypothetical protein AURDEDRAFT_182766 [Auricularia delicata TFB-10046 SS5]	lbc:LACBIDRAFT_255302	hypothetical protein	At1g66540	[Q] KOG0156 Cytochrome P450 CYP2 subfamily	sp|Q09128|CP24A_RAT	1,25-dihydroxyvitamin D(3) 24-hydroxylase, mitochondrial OS=Rattus norvegicus GN=Cyp24a1 PE=1 SV=1	GO:0020037 ;GO:0004601 ;GO:0055114 ;GO:0006979	CYP24A	CYP24
Zoff123043	A	618	3	2	8	80	5	102	5	1	3	5	8	4	0.15	0.11	0.4	4.06	0.26	5.04	0.25	0.05	0.15	0.25	0.4	0.2	0.22	3.12	0.15	0.283333	gi|695033844|ref|XP_009404407.1|	PREDICTED: cytochrome P450 CYP72A219-like [Musa acuminata subsp. malaccensis]	vvi:100254391	hypothetical protein LOC100254391	At3g14650	[QI] KOG0157 Cytochrome P450 CYP4/CYP19/CYP26 subfamilies	sp|H2DH21|C7A29_PANGI	Cytochrome P450 CYP72A219 OS=Panax ginseng PE=2 SV=1	GO:0016491 ;GO:0005488	CYP72A	CYP72
Zoff123157	A	1470	0	0	0	0	0	1	14	0	12	0	0	0	0	0	0	0	0	0.05	0.69	0	0.59	0	0	0	0	0.0166667	0.426667	0	gi|471905460|emb|CCO29065.1|	prostaglandin-endoperoxide synthase 2 [Rhizoctonia solani AG-1 IB]	mpr:MPER_09360	hypothetical protein	Hs5729796	[QI] KOG0157 Cytochrome P450 CYP4/CYP19/CYP26 subfamilies	sp|G5EB19|PPOA_EMENI	Psi-producing oxygenase A OS=Emericella nidulans (strain FGSC A4 / ATCC 38163 / CBS 112.46 / NRRL 194 / M139) GN=ppoA PE=3 SV=1	GO:0020037 ;GO:0016705 ;GO:0005506 ;GO:0004601 ;GO:0055114 ;GO:0006979	CYP	CYP
Zoff123297	B	801	1	0	1	0	0	0	0	0	0	0	0	21	0.05	0	0.05	0	0	0	0	0	0	0	0	1.06	0.0333333	0	0	0.353333	gi|432847397|ref|XP_004066004.1|	PREDICTED: cytochrome P450 4V2-like [Oryzias latipes]	dre:558851	cyp4v2, MGC154161, im:7136890, wu:fd50b03, zgc:154161; cytochrome P450, family 4, subfamily V, polypeptide 2 (EC:1.14.-.-); K07427 cytochrome P450, family 4, subfamily V	CE24183	[QI] KOG0157 Cytochrome P450 CYP4/CYP19/CYP26 subfamilies	sp|A2RRT9|CP4V2_RAT	Cytochrome P450 4V2 OS=Rattus norvegicus GN=Cyp4v2 PE=2 SV=1	GO:0016491 ;GO:0005488	CYP4V	CYP4
Zoff125215	A	1147	4	1	5	12	2	1	0	0	0	0	0	1	0.2	0.06	0.25	0.61	0.1	0.05	0	0	0	0	0	0.05	0.17	0.253333	0	0.0166667	gi|639556283|gb|KDN34607.1|	LOW QUALITY PROTEIN: hypothetical protein RSAG8_12306, partial [Rhizoctonia solani AG-8 WAC10335]	lbc:LACBIDRAFT_300904	hypothetical protein	At3g14630	[QI] KOG0157 Cytochrome P450 CYP4/CYP19/CYP26 subfamilies	sp|Q9LUC8|C7A13_ARATH	Cytochrome P450 72A13 OS=Arabidopsis thaliana GN=CYP72A13 PE=2 SV=1	GO:0046872 ;GO:0016491	CYP72A	CYP72
Zoff125525	A	1583	0	0	34	1	0	0	1	1	0	0	0	5	0	0	1.69	0.05	0	0	0.05	0.05	0	0	0	0.25	0.563333	0.0166667	0.0333333	0.0833333	gi|656906431|gb|KEF52174.1|	hypothetical protein A1O9_11801 [Exophiala aquamarina CBS 119918]	fgr:FG02118.1	hypothetical protein	At3g14620	[QI] KOG0157 Cytochrome P450 CYP4/CYP19/CYP26 subfamilies	sp|H1A981|C7263_MEDTR	11-oxo-beta-amyrin 30-oxidase OS=Medicago truncatula GN=CYP72A63 PE=1 SV=1	GO:0020037 ;GO:0016705 ;GO:0004497 ;GO:0005506 ;GO:0055114 ;GO:0020037 ;GO:0016705 ;GO:0004497 ;GO:0005506 ;GO:0055114	CYP72A	CYP72
Zoff125526	D	699	1	0	22	0	0	1	1	0	0	0	1	4	0.05	0	1.09	0	0	0.05	0.05	0	0	0	0.05	0.2	0.38	0.0166667	0.0166667	0.0833333	gi|656906431|gb|KEF52174.1|	hypothetical protein A1O9_11801 [Exophiala aquamarina CBS 119918]	fgr:FG02118.1	hypothetical protein	CE03070	[Q] KOG0158 Cytochrome P450 CYP3/CYP5/CYP6/CYP9 subfamilies	sp|Q9VA27|CP4C3_DROME	Cytochrome P450 4c3 OS=Drosophila melanogaster GN=Cyp4c3 PE=2 SV=1	GO:0020037 ;GO:0016705 ;GO:0004497 ;GO:0005506 ;GO:0055114	CYP97B	CYP97
Zoff125599	A	1294	0	0	0	4	9	10	0	0	0	0	0	2	0	0	0	0.2	0.47	0.49	0	0	0	0	0	0.1	0	0.386667	0	0.0333333	gi|576988851|gb|EUC61575.1|	cytochrome P450 family monooxygenase pc-bph protein [Rhizoctonia solani AG-3 Rhs1AP]	lbc:LACBIDRAFT_291185	cytochrome P450 monooxygenase; K07824 benzoate 4-monooxygenase [EC:1.14.13.12]	CE01657	[Q] KOG0158 Cytochrome P450 CYP3/CYP5/CYP6/CYP9 subfamilies	sp|P17549|CP53_ASPNG	Benzoate 4-monooxygenase OS=Aspergillus niger GN=bphA PE=1 SV=1	GO:0020037 ;GO:0016705 ;GO:0004497 ;GO:0005506 ;GO:0055114	CYP	CYP
Zoff126207	A	1259	13	1	7	6	0	6	1	0	1	0	0	1	0.64	0.06	0.35	0.3	0	0.3	0.05	0	0.05	0	0	0.05	0.35	0.2	0.0333333	0.0166667	gi|660968052|gb|KEP52192.1|	cytochrome P450 family protein [Rhizoctonia solani 123E]	ppl:POSPLDRAFT_93354	hypothetical protein	7301593	[Q] KOG0158 Cytochrome P450 CYP3/CYP5/CYP6/CYP9 subfamilies	sp|Q9VB31|C6A18_DROME	Probable cytochrome P450 6a18 OS=Drosophila melanogaster GN=Cyp6a18 PE=2 SV=1	GO:0020037 ;GO:0016705 ;GO:0004497 ;GO:0005506 ;GO:0055114	CYP13A	CYP13
Zoff126938	A	513	5	3	7	0	0	0	0	0	0	0	0	0	0.25	0.17	0.35	0	0	0	0	0	0	0	0	0	0.256667	0	0	0	gi|443914945|gb|ELU36619.1|	cytochrome P450 monooxygenase pc-bph [Rhizoctonia solani AG-1 IA]	scm:SCHCODRAFT_86054	hypothetical protein; K07824 benzoate 4-monooxygenase [EC:1.14.13.12]	--	--	sp|P17549|CP53_ASPNG	Benzoate 4-monooxygenase OS=Aspergillus niger GN=bphA PE=1 SV=1	GO:0020037 ;GO:0016705 ;GO:0004497 ;GO:0005506 ;GO:0055114	CYP	CYP
Zoff128010	A	1464	2	2	26	0	0	1	0	0	1	0	0	5	0.1	0.11	1.29	0	0	0.05	0	0	0.05	0	0	0.25	0.5	0.0166667	0.0166667	0.0833333	gi|628267133|ref|XP_007726922.1|	hypothetical protein A1O1_07866 [Capronia coronata CBS 617.96]	pno:SNOG_10960	hypothetical protein	CE01659	[Q] KOG0158 Cytochrome P450 CYP3/CYP5/CYP6/CYP9 subfamilies	sp|Q12645|PID9_FUSSO	Pisatin demethylase OS=Fusarium solani subsp. pisi GN=PDAT9 PE=3 SV=1	GO:0046872 ;GO:0016491 ;GO:0008152	CYP	CYP
Zoff128968	B	912	1009.04	945.56	1130.65	2030.15	1866.24	2259.76	1395.93	1061.93	1442.75	1251.79	1408.63	1686.32	49.66	54.31	56.1	102.99	96.51	111.72	68.7	53.21	71.22	63.3	69.77	84.92	53.3567	103.74	64.3767	72.6633	gi|313760501|dbj|BAJ41269.1|	NADPH-P450 reductase 2 [Zingiber officinale]	osa:4347838	Os09g0558900; K00327 NADPH-ferrihemoprotein reductase [EC:1.6.2.4]	At4g30210	[C] KOG1158 NADP/FAD dependent oxidoreductase	sp|Q05001|NCPR_CATRO	NADPH--cytochrome P450 reductase OS=Catharanthus roseus GN=CPR PE=2 SV=1	GO:0005789 ;GO:0003958 ;GO:0005506 ;GO:0010181 ;GO:0055114	CYP	CYP
Zoff129325	A	1313	0	0	0	0	0	0	8	0	9	0	0	0	0	0	0	0	0	0	0.39	0	0.44	0	0	0	0	0	0.276667	0	gi|576988805|gb|EUC61529.1|	cytochrome P450 family protein [Rhizoctonia solani AG-3 Rhs1AP]	cci:CC1G_01916	614/534 cytochrome P450	Hs4503229	[Q] KOG0158 Cytochrome P450 CYP3/CYP5/CYP6/CYP9 subfamilies	sp|O70537|CP3AV_MESAU	Cytochrome P450 3A31 OS=Mesocricetus auratus GN=CYP3A31 PE=2 SV=1	GO:0046872 ;GO:0016491	CYP3A	CYP3
Zoff129760	C	430	0	0	0	2	0	0	0	0	0	1	0	0	0	0	0	0.1	0	0	0	0	0	0.05	0	0	0	0.0333333	0	0.0166667	gi|666867842|gb|KEZ44212.1|	Eburicol 14-alpha-demethylase [Scedosporium apiospermum]	fgr:FG01000.1	hypothetical protein; K05917 cytochrome P450, family 51 (sterol 14-demethylase) [EC:1.14.13.70]	SPAC13A11.02c	[Q] KOG0684 Cytochrome P450	sp|O14442|CP51_UNCNE	Eburicol 14-alpha-demethylase OS=Uncinula necator GN=CYP51 PE=2 SV=2	GO:0008398 ;GO:0070988 ;GO:0005506 ;GO:0020037 ;GO:0006696 ;GO:0032259 ;GO:0008168 ;GO:0005783 ;GO:0055114	CYP51	CYP51
Zoff129944	B	991	0	0	0	0	0	15	0	0	0	0	0	0	0	0	0	0	0	0.74	0	0	0	0	0	0	0	0.246667	0	0	gi|695415557|ref|XP_009526595.1|	hypothetical protein PHYSODRAFT_499752 [Phytophthora sojae]	pif:PITG_14013	cytochrome P450, putative	At4g00360	[QI] KOG0157 Cytochrome P450 CYP4/CYP19/CYP26 subfamilies	sp|O23066|C86A2_ARATH	Cytochrome P450 86A2 OS=Arabidopsis thaliana GN=CYP86A2 PE=1 SV=1	GO:0046872 ;GO:0016491	CYP86A	CYP86
Zoff129945	B	434	0	0	0	1	0	2	0	0	0	0	0	0	0	0	0	0.05	0	0.1	0	0	0	0	0	0	0	0.05	0	0	gi|567988802|gb|ETL39074.1|	hypothetical protein L916_09500 [Phytophthora parasitica]	pif:PITG_14013	cytochrome P450, putative	At2g44890	[QI] KOG0157 Cytochrome P450 CYP4/CYP19/CYP26 subfamilies	sp|Q9FMV7|C94B1_ARATH	Cytochrome P450 94B1 OS=Arabidopsis thaliana GN=CYP94B1 PE=2 SV=1	GO:0046872 ;GO:0016491	CYP94B	CYP94
Zoff129946	B	434	0	0	0	0	0	2	0	0	0	0	0	0	0	0	0	0	0	0.1	0	0	0	0	0	0	0	0.0333333	0	0	gi|567960077|gb|ETK85641.1|	hypothetical protein L915_09602 [Phytophthora parasitica]	pif:PITG_14013	cytochrome P450, putative	At2g44890	[QI] KOG0157 Cytochrome P450 CYP4/CYP19/CYP26 subfamilies	sp|Q9FMV7|C94B1_ARATH	Cytochrome P450 94B1 OS=Arabidopsis thaliana GN=CYP94B1 PE=2 SV=1	GO:0046872 ;GO:0016491	CYP94B	CYP94
Zoff130362	B	444	2	0	0	0	0	0	0	0	0	0	0	0	0.1	0	0	0	0	0	0	0	0	0	0	0	0.0333333	0	0	0	gi|291221667|ref|XP_002730850.1|	PREDICTED: steroid 17-alpha-hydroxylase/17,20 lyase-like [Saccoglossus kowalevskii]	bfo:BRAFLDRAFT_145601	hypothetical protein	--	--	sp|Q92148|CP1A1_MICTO	Cytochrome P450 1A1 OS=Microgadus tomcod GN=cyp1a1 PE=2 SV=1	--	CYP1A	CYP1
Zoff130364	A	418	2	0	0	0	0	0	0	0	0	0	0	0	0.1	0	0	0	0	0	0	0	0	0	0	0	0.0333333	0	0	0	gi|260799381|ref|XP_002594675.1|	hypothetical protein BRAFLDRAFT_287037 [Branchiostoma floridae]	bfo:BRAFLDRAFT_287037	hypothetical protein	CE08931	[Q] KOG0156 Cytochrome P450 CYP2 subfamily	sp|O57525|CP17A_RANDY	Steroid 17-alpha-hydroxylase/17,20 lyase OS=Rana dybowskii GN=CYP17A1 PE=2 SV=1	GO:0046872 ;GO:0016705 ;GO:0004497	CYP2U	CYP2
Zoff130366	A	412	0	0	0	0	0	0	0	0	0	0	0	0	0	0	0	0	0	0	0	0	0	0	0	0	0	0	0	0	gi|585642031|ref|XP_006811117.1|	PREDICTED: steroid 17-alpha-hydroxylase/17,20 lyase-like [Saccoglossus kowalevskii]	bfo:BRAFLDRAFT_121141	hypothetical protein	CE08839	[Q] KOG0156 Cytochrome P450 CYP2 subfamily	sp|Q92113|CP17A_SQUAC	Steroid 17-alpha-hydroxylase/17,20 lyase OS=Squalus acanthias GN=CYP17A1 PE=2 SV=1	GO:0016491	CYP1A	CYP1
Zoff130367	A	410	6	0	0	0	0	0	0	0	0	0	0	0	0.3	0	0	0	0	0	0	0	0	0	0	0	0.1	0	0	0	gi|641650891|ref|XP_008189916.1|	PREDICTED: probable cytochrome P450 305a1 [Acyrthosiphon pisum]	api:100160402	similar to cytochrome P450 CYP15A1	At4g37330	[Q] KOG0156 Cytochrome P450 CYP2 subfamily	sp|Q92113|CP17A_SQUAC	Steroid 17-alpha-hydroxylase/17,20 lyase OS=Squalus acanthias GN=CYP17A1 PE=2 SV=1	GO:0016491	CYP1A	CYP1
Zoff130368	A	473	8	0	0	0	0	0	0	0	0	0	0	0	0.39	0	0	0	0	0	0	0	0	0	0	0	0.13	0	0	0	gi|241671627|ref|XP_002400106.1|	cytochrome P-450 IIC4, putative [Ixodes scapularis]	isc:IscW_ISCW022069	cytochrome P-450 IIC4, putative (EC:1.14.14.1)	At3g03470	[Q] KOG0156 Cytochrome P450 CYP2 subfamily	sp|Q9MZY0|CP2E1_CANFA	Cytochrome P450 2E1 OS=Canis familiaris GN=CYP2E1 PE=2 SV=1	GO:0005488 ;GO:0016491 ;GO:0008152	CYP1A	CYP1
Zoff133660	C	874	0	0	1	6	3	2	0	1	0	5	0	0	0	0	0.05	0.3	0.16	0.1	0	0.05	0	0.25	0	0	0.0166667	0.186667	0.0166667	0.0833333	gi|615473991|ref|XP_007601970.1|	cytochrome P450 [Colletotrichum fioriniae PJ7]	mgr:MGG_09920	MG09920.4; hypothetical protein	At3g56630	[QI] KOG0157 Cytochrome P450 CYP4/CYP19/CYP26 subfamilies	sp|Q9Y758|CP52M_DEBHN	Cytochrome P450 52A13 OS=Debaryomyces hansenii GN=CYP52A13 PE=2 SV=1	GO:0020037 ;GO:0016020 ;GO:0016712 ;GO:0005506 ;GO:0055114 ;GO:0020037 ;GO:0016020 ;GO:0016712 ;GO:0005506 ;GO:0055114	CYP52A	CYP52
Zoff134149	A	938	0	0	0	0	0	0	0	0	0	0	0	9.9	0	0	0	0	0	0	0	0	0	0	0	0.5	0	0	0	0.166667	gi|470517645|ref|XP_004353227.1|	sterol C22 desaturase -like, putative [Acanthamoeba castellanii str. Neff]	vcn:VOLCADRAFT_68965	cytochrome P450, C-22 desaturase	At2g34490	[QI] KOG0157 Cytochrome P450 CYP4/CYP19/CYP26 subfamilies	sp|O64698|C7102_ARATH	Cytochrome P450 710A2 OS=Arabidopsis thaliana GN=CYP710A2 PE=2 SV=1	GO:0016491 ;GO:0005488	CYP710A	CYP710
Zoff134150	A	937	1	0	1	0	0	0	0	0	0	0	0	1.1	0.05	0	0.05	0	0	0	0	0	0	0	0	0.06	0.0333333	0	0	0.02	gi|302853020|ref|XP_002958027.1|	cytochrome P450, C-22 desaturase [Volvox carteri f. nagariensis]	vcn:VOLCADRAFT_68965	cytochrome P450, C-22 desaturase	At2g34490	[QI] KOG0157 Cytochrome P450 CYP4/CYP19/CYP26 subfamilies	sp|O64698|C7102_ARATH	Cytochrome P450 710A2 OS=Arabidopsis thaliana GN=CYP710A2 PE=2 SV=1	GO:0005488 ;GO:0016491	CYP710A	CYP710
Zoff134348	C	3042	74	43	34	10	36	21	21	47	34	3	2	12	3.64	2.47	1.69	0.51	1.86	1.04	1.03	2.35	1.68	0.15	0.1	0.6	2.6	1.13667	1.68667	0.283333	gi|628309421|ref|XP_007740881.1|	NADPH-cytochrome P450 reductase [Cladophialophora psammophila CBS 110553]	ani:AN0595.2	NCPR_ASPNG NADPH-cytochrome P450 reductase (CPR) (P450R); K00327 NADPH-ferrihemoprotein reductase [EC:1.6.2.4]	SPBC365.17	[C] KOG1158 NADP/FAD dependent oxidoreductase	sp|Q5BFT5|NCPR_EMENI	NADPH--cytochrome P450 reductase OS=Emericella nidulans (strain FGSC A4 / ATCC 38163 / CBS 112.46 / NRRL 194 / M139) GN=cprA PE=3 SV=1	GO:0016021 ;GO:0055114 ;GO:0003958 ;GO:0003676 ;GO:0006790 ;GO:0006091 ;GO:0050311 ;GO:0005789 ;GO:0010181 ;GO:0005506 ;GO:0005886 ;GO:0016126	CYP	CYP
Zoff135171	C	1373	0	0	0	0	0	0	1	0	0	71	0	1	0	0	0	0	0	0	0.05	0	0	3.59	0	0.05	0	0	0.0166667	1.21333	gi|587686731|gb|EWZ33336.1|	cytochrome P450 55A1 [Fusarium oxysporum Fo47]	pan:PODANSg1411	hypothetical protein	At1g05160	[QI] KOG0157 Cytochrome P450 CYP4/CYP19/CYP26 subfamilies	sp|P23295|NOR_FUSOX	NADP nitrous oxide-forming nitric oxide reductase OS=Fusarium oxysporum GN=CYP55A1 PE=1 SV=2	GO:0020037 ;GO:0016705 ;GO:0004497 ;GO:0005506 ;GO:0055114	CYP55A	CYP55
Zoff135172	C	663	0	0	0	0	0	0	0	0	0	0	0	0	0	0	0	0	0	0	0	0	0	0	0	0	0	0	0	0	gi|587686731|gb|EWZ33336.1|	cytochrome P450 55A1 [Fusarium oxysporum Fo47]	ncr:NCU06137	cytochrome P450 55A2	--	--	sp|P23295|NOR_FUSOX	NADP nitrous oxide-forming nitric oxide reductase OS=Fusarium oxysporum GN=CYP55A1 PE=1 SV=2	GO:0020037 ;GO:0016705 ;GO:0004497 ;GO:0005506 ;GO:0055114	CYP55A	CYP55
Zoff135396	D	1728	221	182	181	22	47	57	77	195	129	43	50	75	10.88	10.45	8.98	1.12	2.43	2.82	3.79	9.77	6.37	2.17	2.48	3.78	10.1033	2.12333	6.64333	2.81	gi|695048565|ref|XP_009412197.1|	PREDICTED: flavonoid 3',5'-hydroxylase 1-like [Musa acuminata subsp. malaccensis]	sbi:SORBI_01g034460	hypothetical protein; K13083 cytochrome P450, family 75, subfamily A (flavonoid 3',5'-hydroxylase) [EC:1.14.13.88]	At5g07990	[Q] KOG0156 Cytochrome P450 CYP2 subfamily	sp|P48418|C75A1_PETHY	Flavonoid 3',5'-hydroxylase 1 OS=Petunia hybrida GN=CYP75A1 PE=2 SV=1	GO:0046872 ;GO:0016491 ;GO:0020037 ;GO:0016705 ;GO:0005506 ;GO:0055114	CYP75A	CYP75
Zoff136411	D	1845	36	3	26	0	0	0	0	0	3	1	0	12	1.77	0.17	1.29	0	0	0	0	0	0.15	0.05	0	0.6	1.07667	0	0.05	0.216667	gi|656910014|gb|KEF55692.1|	hypothetical protein A1O9_08442 [Exophiala aquamarina CBS 119918]	mgr:MGG_05235	MG05235.4; hypothetical protein	At4g13770	[Q] KOG0156 Cytochrome P450 CYP2 subfamily	sp|Q12645|PID9_FUSSO	Pisatin demethylase OS=Fusarium solani subsp. pisi GN=PDAT9 PE=3 SV=1	GO:0020037 ;GO:0016705 ;GO:0004497 ;GO:0005506 ;GO:0055114	CYP	CYP
Zoff136412	D	1282	0	0	0	0	0	2	0	0	0	0	0	0	0	0	0	0	0	0.1	0	0	0	0	0	0	0	0.0333333	0	0	gi|656910014|gb|KEF55692.1|	hypothetical protein A1O9_08442 [Exophiala aquamarina CBS 119918]	ncr:NCU06526	hypothetical protein	At5g63450	[QI] KOG0157 Cytochrome P450 CYP4/CYP19/CYP26 subfamilies	sp|Q12645|PID9_FUSSO	Pisatin demethylase OS=Fusarium solani subsp. pisi GN=PDAT9 PE=3 SV=1	GO:0020037 ;GO:0016705 ;GO:0004497 ;GO:0005506 ;GO:0055114	CYP	CYP
Zoff137388	D	1433	1	4	19	0	0	0	2	1	1	0	1	2	0.05	0.23	0.94	0	0	0	0.1	0.05	0.05	0	0.05	0.1	0.406667	0	0.0666667	0.05	gi|656910897|gb|KEF56530.1|	hypothetical protein A1O9_06717 [Exophiala aquamarina CBS 119918]	afm:AFUA_3G02010	cytochrome P450 monooxygenase	At2g26710	[QI] KOG0157 Cytochrome P450 CYP4/CYP19/CYP26 subfamilies	sp|Q00714|STCS_EMENI	Probable sterigmatocystin biosynthesis P450 monooxygenase stcS OS=Emericella nidulans (strain FGSC A4 / ATCC 38163 / CBS 112.46 / NRRL 194 / M139) GN=stcS PE=1 SV=2	GO:0055114 ;GO:0016705 ;GO:0004497 ;GO:0020037 ;GO:0005506	CYP	CYP
Zoff137561	A	790	0	0	0	0	0	0	0	0	0	0	0	13	0	0	0	0	0	0	0	0	0	0	0	0.65	0	0	0	0.216667	gi|585113206|gb|EWM30542.1|	cytochrome p450 hydroxylase [Nannochloropsis gaditana]	nve:NEMVE_v1g113799	hypothetical protein	CE24183	[QI] KOG0157 Cytochrome P450 CYP4/CYP19/CYP26 subfamilies	sp|Q6Z6D6|C7342_ORYSJ	Cytochrome P450 734A2 OS=Oryza sativa subsp. japonica GN=CYP734A2 PE=2 SV=1	--	CYP734A	CYP734
Zoff138030	C	1336	18	1.72	4	0	0	0	0	0	0	0	0	0	0.89	0.1	0.2	0	0	0	0	0	0	0	0	0	0.396667	0	0	0	gi|576982588|gb|EUC55331.1|	cytochrome P450 family:NADPH-P450 family reductase, partial [Rhizoctonia solani AG-3 Rhs1AP]	--	--	--	--	--	--	GO:0043167	CYP	CYP
Zoff139116	A	1513	0	1	0	0	0	0	1	0	0	0	0	44	0	0.06	0	0	0	0	0.05	0	0	0	0	2.22	0.02	0	0.0166667	0.74	gi|595461802|gb|EXX63890.1|	sterol 14-demethylase [Rhizophagus irregularis DAOM 197198w]	tad:TRIADDRAFT_59487	hypothetical protein	Hs4503229	[Q] KOG0158 Cytochrome P450 CYP3/CYP5/CYP6/CYP9 subfamilies	sp|P24463|CP3AC_CANFA	Cytochrome P450 3A12 OS=Canis familiaris GN=CYP3A12 PE=2 SV=1	GO:0016491 ;GO:0005488	CYP4F	CYP4
Zoff141777	C	691	2	3	1	0	0	0	0	0	2	1	0	0	0.1	0.17	0.05	0	0	0	0	0	0.1	0.05	0	0	0.106667	0	0.0333333	0.0166667	gi|598043383|ref|XP_007351064.1|	cytochrome P450 oxidoreductase [Auricularia delicata TFB-10046 SS5]	cci:CC1G_15012	cytochrome P450 oxidoreductase; K00327 NADPH-ferrihemoprotein reductase [EC:1.6.2.4]	SPBC365.17	[C] KOG1158 NADP/FAD dependent oxidoreductase	sp|Q9HDG2|NCPR_PHACH	NADPH--cytochrome P450 reductase OS=Phanerochaete chrysosporium GN=CPR PE=2 SV=1	GO:0005506 ;GO:0003958 ;GO:0055114 ;GO:0010181	CYP	CYP
Zoff142632	A	2344	44	32	52	14	19	25	98	105	85	47	28	36	2.17	1.84	2.58	0.71	0.98	1.24	4.82	5.26	4.2	2.38	1.39	1.81	2.19667	0.976667	4.76	1.86	gi|695068468|ref|XP_009381179.1|	PREDICTED: cytochrome P450 90D2-like isoform X3 [Musa acuminata subsp. malaccensis]	pop:POPTR_703918	CYP90D5; cytochrome P450 probable 6-deoxoteasterone to 3-dehydro 6-deoxoteasterone or teasterone to 3-dehydro teasterone	At3g13730	[QI] KOG0157 Cytochrome P450 CYP4/CYP19/CYP26 subfamilies	sp|Q94IW5|C90D2_ORYSJ	Cytochrome P450 90D2 OS=Oryza sativa subsp. japonica GN=CYP90D2 PE=1 SV=1	GO:0016132 ;GO:0016021 ;GO:0055114 ;GO:0009055 ;GO:0048441 ;GO:0048443 ;GO:0048366 ;GO:0020037 ;GO:0016709 ;GO:0005789 ;GO:0005506 ;GO:0016132 ;GO:0016021 ;GO:0055114 ;GO:0009055 ;GO:0048441 ;GO:0048443 ;GO:0048366 ;GO:0020037 ;GO:0016709 ;GO:0005789 ;GO:0005506 ;GO:0016132 ;GO:0016021 ;GO:0022900 ;GO:0009055 ;GO:0048441 ;GO:0048443 ;GO:0048366 ;GO:0020037 ;GO:0016709 ;GO:0005789 ;GO:0005506 ;GO:…	CYP90D	CYP90
Zoff143620	A	1395	1	0	1	0	0	0	0	0	0	0	0	30	0.05	0	0.05	0	0	0	0	0	0	0	0	1.51	0.0333333	0	0	0.503333	gi|171702251|dbj|BAG16268.1|	cytochrome P450 [Macaca fascicularis]	mcc:100144394	CYP3A7; cytochrome P450, family 3, subfamily A, polypeptide 7 (EC:1.14.14.1); K07424 cytochrome P450, family 3, subfamily A [EC:1.14.14.1]	Hs4503231	[Q] KOG0158 Cytochrome P450 CYP3/CYP5/CYP6/CYP9 subfamilies	sp|Q64459|CP3AB_MOUSE	Cytochrome P450 3A11 OS=Mus musculus GN=Cyp3a11 PE=1 SV=1	GO:0071704 ;GO:0044248 ;GO:0005488 ;GO:0043231 ;GO:0055114 ;GO:0004497 ;GO:0016020 ;GO:0070988	CYP3A	CYP3
Zoff144637	D	1622	21	12	84	0	0	2	5	14	7	8	2	45	1.03	0.69	4.17	0	0	0.1	0.25	0.7	0.35	0.4	0.1	2.27	1.96333	0.0333333	0.433333	0.923333	gi|656907438|gb|KEF53176.1|	cytochrome P450 oxidoreductase [Exophiala aquamarina CBS 119918]	ssl:SS1G_00445	hypothetical protein	SPAC19G12.08	[I] KOG0539 Sphingolipid fatty acid hydroxylase	sp|Q03529|SCS7_YEAST	Ceramide very long chain fatty acid hydroxylase SCS7 OS=Saccharomyces cerevisiae (strain ATCC 204508 / S288c) GN=SCS7 PE=1 SV=1	GO:0006633 ;GO:0006665 ;GO:0016491 ;GO:0005506 ;GO:0020037 ;GO:0005783 ;GO:0055114	CYP	CYP
Zoff147255	A	965	20	4	1	6	0	0	0	0	0	0	0	1	0.98	0.23	0.05	0.3	0	0	0	0	0	0	0	0.05	0.42	0.1	0	0.0166667	gi|576992540|gb|EUC65215.1|	cytochrome P450 family domain protein [Rhizoctonia solani AG-3 Rhs1AP]	cci:CC1G_06729	hypothetical protein	--	--	--	--	GO:0046872 ;GO:0016491 ;GO:0020037 ;GO:0016705 ;GO:0004497 ;GO:0005506 ;GO:0055114	CYP	CYP
Zoff147258	B	839	2	1	2	2	1	0	2	8	8	6	0	2	0.1	0.06	0.1	0.1	0.05	0	0.1	0.4	0.39	0.3	0	0.1	0.0866667	0.05	0.296667	0.133333	gi|695073817|ref|XP_009384087.1|	PREDICTED: cytochrome P450 84A1-like [Musa acuminata subsp. malaccensis]	zma:100273589	hypothetical protein LOC100273589; K09755 ferulate-5-hydroxylase [EC:1.14.-.-]	At4g36220	[Q] KOG0156 Cytochrome P450 CYP2 subfamily	sp|Q42600|C84A1_ARATH	Cytochrome P450 84A1 OS=Arabidopsis thaliana GN=CYP84A1 PE=1 SV=1	GO:0020037 ;GO:0016705 ;GO:0022900 ;GO:0004497 ;GO:0005506 ;GO:0046872 ;GO:0022900 ;GO:0004497 ;GO:0020037 ;GO:0016705 ;GO:0022900 ;GO:0004497 ;GO:0005506	CYP84A	CYP84
Zoff147766	B	1263	5	3	0	0	1	0	0	0	0	2	0	15	0.25	0.17	0	0	0.05	0	0	0	0	0.1	0	0.76	0.14	0.0166667	0	0.286667	gi|694537659|ref|XP_009495956.1|	hypothetical protein H696_03822 [Fonticula alba]	smo:SELMODRAFT_112911	hypothetical protein	At1g69500	[QI] KOG0157 Cytochrome P450 CYP4/CYP19/CYP26 subfamilies	sp|Q9C788|C70B1_ARATH	Cytochrome P450 704B1 OS=Arabidopsis thaliana GN=CYP704B1 PE=2 SV=1	GO:0046872 ;GO:0016491	CYP704B	CYP704
Zoff148127	A	1129	2	2	16	0	0	0	0	5	0	0	0	2	0.1	0.11	0.79	0	0	0	0	0.25	0	0	0	0.1	0.333333	0	0.0833333	0.0333333	gi|584416913|emb|CDM28622.1|	Cytochrome P450 [Penicillium roqueforti FM164]	bfu:BC1G_16084	hypothetical protein	--	--	sp|Q00707|STCL_EMENI	Versicolorin B desaturase OS=Emericella nidulans (strain FGSC A4 / ATCC 38163 / CBS 112.46 / NRRL 194 / M139) GN=stcL PE=1 SV=2	--	CYP	CYP
Zoff148158	D	669	54.43	46	318.31	592.13	126	817.71	30	132.44	51	409.38	34.4	125	2.68	2.64	15.79	30.04	6.52	40.43	1.48	6.64	2.52	20.7	1.7	6.29	7.03667	25.6633	3.54667	9.56333	gi|327387359|gb|AEA72281.1|	cinnamate 4-hydroxylase [Angelica gigas]	rcu:RCOM_1164350	cinnamate 4-hydroxylase, putative (EC:1.14.13.11); K00487 trans-cinnamate 4-monooxygenase [EC:1.14.13.11]	At2g30490	[Q] KOG0156 Cytochrome P450 CYP2 subfamily	sp|O81928|TCMO_CICAR	Trans-cinnamate 4-monooxygenase OS=Cicer arietinum GN=CYP73A19 PE=2 SV=2	GO:0020037 ;GO:0016710 ;GO:0005506 ;GO:0055114	CYP73A	CYP73
Zoff148303	A	1454	112	105	102	385	212	160	199	253	312	372	72	114	5.51	6.03	5.06	19.53	10.96	7.91	9.79	12.68	15.4	18.81	3.57	5.74	5.53333	12.8	12.6233	9.37333	gi|695014757|ref|XP_009394217.1|	PREDICTED: cytochrome P450 CYP72A219-like [Musa acuminata subsp. malaccensis]	sbi:SORBI_03g028600	hypothetical protein	At3g14610	[QI] KOG0157 Cytochrome P450 CYP4/CYP19/CYP26 subfamilies	sp|H2DH21|C7A29_PANGI	Cytochrome P450 CYP72A219 OS=Panax ginseng PE=2 SV=1	GO:0046872 ;GO:0016491	CYP72A	CYP72
Zoff148742	B	2694	4	1	174	0	0	0	1	1	1	7	2	17	0.2	0.06	8.63	0	0	0	0.05	0.05	0.05	0.35	0.1	0.86	2.96333	0	0.05	0.436667	gi|684157332|ref|XP_009152544.1|	cytochrome P450 alkane hydroxylase [Exophiala dermatitidis NIH/UT8656]	pcs:Pc20g11290	Pc20g11290	At1g24540	[QI] KOG0157 Cytochrome P450 CYP4/CYP19/CYP26 subfamilies	sp|Q9Y757|CP52L_DEBHN	Cytochrome P450 52A12 OS=Debaryomyces hansenii GN=CYP52A12 PE=2 SV=2	GO:0020037 ;GO:0016712 ;GO:0005506 ;GO:0055114 ;GO:0020037 ;GO:0016712 ;GO:0005506 ;GO:0055114 ;GO:0020037 ;GO:0016712 ;GO:0005506 ;GO:0055114 ;GO:0020037 ;GO:0016712 ;GO:0005506 ;GO:0055114	CYP52A	CYP52
Zoff151318	D	951	363	397	411	573	550	443	705	642	841	631	404	482	17.87	22.8	20.39	29.07	28.44	21.9	34.69	32.17	41.51	31.91	20.01	24.27	20.3533	26.47	36.1233	25.3967	gi|695051829|ref|XP_009413956.1|	PREDICTED: cytochrome P450 98A2 [Musa acuminata subsp. malaccensis]	ath:AT2G40890	CYP98A3 (cytochrome P450, family 98, subfamily A, polypeptide 3); monooxygenase/ p-coumarate 3-hydroxylase; K09754 p-coumarate 3-hydroxylase [EC:1.14.13.-]	At2g40890	[Q] KOG0156 Cytochrome P450 CYP2 subfamily	sp|O48922|C98A2_SOYBN	Cytochrome P450 98A2 OS=Glycine max GN=CYP98A2 PE=2 SV=1	GO:0020037 ;GO:0016021 ;GO:0016705 ;GO:0004497 ;GO:0005506 ;GO:0055114	CYP98A	CYP98
Zoff151461	A	585	0	0	0	0	0.18	0	2	0.72	0	0	0	0	0	0	0	0	0.01	0	0.1	0.04	0	0	0	0	0	0.00333333	0.0466667	0	gi|628351354|ref|XP_007750785.1|	hypothetical protein A1O5_12026 [Cladophialophora psammophila CBS 110553]	ang:ANI_1_3314024	benzoate 4-monooxygenase cytochrome P450	--	--	sp|Q12612|TRI4_FUSSP	Trichodiene oxygenase OS=Fusarium sporotrichioides GN=TRI4 PE=3 SV=1	GO:0020037 ;GO:0016705 ;GO:0005506 ;GO:0055114	CYP	CYP
Zoff151462	A	1670	0	0	63	0	4.82	1	0	1.28	0	2	0	5	0	0	3.13	0	0.25	0.05	0	0.06	0	0.1	0	0.25	1.04333	0.1	0.02	0.116667	gi|628303911|ref|XP_007734417.1|	hypothetical protein A1O3_06107 [Capronia epimyces CBS 606.96]	ani:AN8309.2	hypothetical protein	CE16781	[Q] KOG0156 Cytochrome P450 CYP2 subfamily	sp|Q12612|TRI4_FUSSP	Trichodiene oxygenase OS=Fusarium sporotrichioides GN=TRI4 PE=3 SV=1	GO:0020037 ;GO:0016705 ;GO:0005506 ;GO:0055114	CYP	CYP
Zoff152009	A	1787	14	17	5	8	7	10	7	1	21	0	1	1	0.69	0.98	0.25	0.41	0.36	0.49	0.34	0.05	1.04	0	0.05	0.05	0.64	0.42	0.476667	0.0333333	gi|628349120|ref|XP_007750072.1|	hypothetical protein A1O5_11310 [Cladophialophora psammophila CBS 110553]	nfi:NFIA_047320	Cytochrome P450 oxidoreductase, putative	At1g74540	[Q] KOG0156 Cytochrome P450 CYP2 subfamily	sp|Q4WAW8|FTME_ASPFU	Fumitremorgin C synthase OS=Neosartorya fumigata (strain ATCC MYA-4609 / Af293 / CBS 101355 / FGSC A1100) GN=ftmP450-2 PE=3 SV=1	GO:0020037 ;GO:0016705 ;GO:0004497 ;GO:0005506 ;GO:0055114	CYP2	CYP2
Zoff152048	D	1054	20	38	27	18	23	23	42	82	10	13	6	50	0.98	2.18	1.34	0.91	1.19	1.14	2.07	4.11	0.49	0.66	0.3	2.52	1.5	1.08	2.22333	1.16	gi|695014951|ref|XP_009394321.1|	PREDICTED: flavonoid 3'-monooxygenase [Musa acuminata subsp. malaccensis]	vvi:100263810	hypothetical protein; K05280 flavonoid 3'-monooxygenase [EC:1.14.13.21]	At5g07990	[Q] KOG0156 Cytochrome P450 CYP2 subfamily	sp|Q9SBQ9|F3PH_PETHY	Flavonoid 3'-monooxygenase OS=Petunia hybrida GN=CYP75B2 PE=2 SV=1	GO:0046872 ;GO:0016705 ;GO:0004497 ;GO:0009813 ;GO:0004497 ;GO:0005506 ;GO:0020037 ;GO:0016705 ;GO:0005783 ;GO:0044425 ;GO:0055114 ;GO:0009411	CYP75B	CYP75
Zoff152441	D	1531	0	1	2	10	2	4	0	0	0	15	0	0	0	0.06	0.1	0.51	0.1	0.2	0	0	0	0.76	0	0	0.0533333	0.27	0	0.253333	gi|667729627|gb|KFA70354.1|	hypothetical protein S40285_01749 [Stachybotrys chlorohalonata IBT 40285]	mgr:MGG_03392	MG03392.4; hypothetical protein	At4g13770	[Q] KOG0156 Cytochrome P450 CYP2 subfamily	sp|Q12645|PID9_FUSSO	Pisatin demethylase OS=Fusarium solani subsp. pisi GN=PDAT9 PE=3 SV=1	GO:0020037 ;GO:0016705 ;GO:0005506 ;GO:0055114 ;GO:0020037 ;GO:0016705 ;GO:0005506 ;GO:0055114	CYP	CYP
Zoff153101	B	1712	1272.88	1423.07	2434.97	1201.87	737.6	986.62	1418.02	1644.23	1642.27	2844.97	937.4	1417.95	62.65	81.74	120.82	60.97	38.14	48.78	69.78	82.38	81.07	143.87	46.43	71.41	88.4033	49.2967	77.7433	87.2367	gi|695044564|ref|XP_009410039.1|	PREDICTED: trans-cinnamate 4-monooxygenase-like [Musa acuminata subsp. malaccensis]	pop:POPTR_823837	C4H2, CYP73A42; cytochrome P450 cinnamate 4-hydroxylase (EC:1.14.13.11); K00487 trans-cinnamate 4-monooxygenase [EC:1.14.13.11]	At2g30490	[Q] KOG0156 Cytochrome P450 CYP2 subfamily	sp|Q43054|TCMO_POPKI	Trans-cinnamate 4-monooxygenase OS=Populus kitakamiensis GN=CYP73A16 PE=2 SV=1	GO:0020037 ;GO:0016710 ;GO:0005506 ;GO:0055114	CYP73A	CYP73
Zoff153738	A	786	0	0	0	0	0	0	0	0	0	0	0	16	0	0	0	0	0	0	0	0	0	0	0	0.81	0	0	0	0.27	gi|470395572|ref|XP_004335087.1|	peroxidase [Acanthamoeba castellanii str. Neff]	isc:IscW_ISCW021866	cytochrome P450, putative (EC:1.14.15.6)	CE13541	[Q] KOG0158 Cytochrome P450 CYP3/CYP5/CYP6/CYP9 subfamilies	sp|Q27516|C13A8_CAEEL	Putative cytochrome P450 CYP13A8 OS=Caenorhabditis elegans GN=cyp-13A8 PE=3 SV=2	GO:0005488 ;GO:0044763 ;GO:0006766 ;GO:0070576 ;GO:0033280 ;GO:0008202	CYP315A	CYP315
Zoff155032	A	941	1	1	6	0	0	0	0	1	0	2	0	0	0.05	0.06	0.3	0	0	0	0	0.05	0	0.1	0	0	0.136667	0	0.0166667	0.0333333	gi|672128173|ref|XP_008787566.1|	PREDICTED: cytokinin hydroxylase [Phoenix dactylifera]	sbi:SORBI_04g037870	hypothetical protein	At5g52400	[QI] KOG0157 Cytochrome P450 CYP4/CYP19/CYP26 subfamilies	sp|B9GBJ9|C14C1_ORYSJ	Cytochrome P450 714C1 OS=Oryza sativa subsp. japonica GN=CYP714C1 PE=2 SV=1	GO:0016023 ;GO:0009055 ;GO:0004497 ;GO:0005506 ;GO:0020037 ;GO:0016705 ;GO:0055114	CYP714C	CYP714
Zoff155206	C	2482	4	5	58	0	1	2	2	0	0	3	0	7	0.2	0.29	2.88	0	0.05	0.1	0.1	0	0	0.15	0	0.35	1.12333	0.05	0.0333333	0.166667	gi|684170272|ref|XP_009159007.1|	hypothetical protein HMPREF1120_06555 [Exophiala dermatitidis NIH/UT8656]	bfu:BC1G_07134	hypothetical protein	At3g14680	[QI] KOG0157 Cytochrome P450 CYP4/CYP19/CYP26 subfamilies	sp|H1A988|C7254_GLYUR	11-oxo-beta-amyrin 30-oxidase OS=Glycyrrhiza uralensis GN=CYP72A154 PE=1 SV=1	GO:0020037 ;GO:0016705 ;GO:0004497 ;GO:0005506 ;GO:0055114	CYP72A	CYP72
Zoff156147	B	2139	12	1	111.74	0	1	1.07	0	0	0	2	0	23	0.59	0.06	5.54	0	0.05	0.05	0	0	0	0.1	0	1.16	2.06333	0.0333333	0	0.42	gi|628339020|ref|XP_007746855.1|	hypothetical protein A1O5_08080 [Cladophialophora psammophila CBS 110553]	fgr:FG11282.1	hypothetical protein	At5g45340	[QI] KOG0157 Cytochrome P450 CYP4/CYP19/CYP26 subfamilies	sp|Q701P2|KO1_GIBIN	Ent-kaurene oxidase OS=Gibberella intermedia GN=CYP503A1 PE=1 SV=1	GO:0016491 ;GO:0005488 ;GO:0046872 ;GO:0016491	CYP503A	CYP503
Zoff156322	A	1155	14	21	18	69	21	42	12	35	31	47	29	46	0.69	1.21	0.89	3.5	1.09	2.08	0.59	1.75	1.53	2.38	1.44	2.32	0.93	2.22333	1.29	2.04667	gi|695018141|ref|XP_009396020.1|	PREDICTED: cytochrome P450 90B1-like isoform X2 [Musa acuminata subsp. malaccensis]	rcu:RCOM_0536900	cytochrome P450, putative (EC:1.14.13.76); K09587 cytochrome P450, family 90, subfamily B, polypeptide 1 (steroid 22-alpha-hydroxylase) [EC:1.14.13.-]	At3g50660	[QI] KOG0157 Cytochrome P450 CYP4/CYP19/CYP26 subfamilies	sp|O64989|C90B1_ARATH	Cytochrome P450 90B1 OS=Arabidopsis thaliana GN=CYP90B1 PE=1 SV=2	GO:0020037 ;GO:0050597 ;GO:0005506 ;GO:0055114 ;GO:0020037 ;GO:0016705 ;GO:0005506 ;GO:0004497 ;GO:0055114	CYP90B	CYP90
Zoff157017	A	413	0	0	1	6	0	0	0	0	0	2	0	0	0	0	0.05	0.3	0	0	0	0	0	0.1	0	0	0.0166667	0.1	0	0.0333333	gi|399165741|emb|CCE33417.1|	probable cytochrome P450 51 (eburicol 14 alpha-demethylase) [Claviceps purpurea 20.1]	fgr:FG01000.1	hypothetical protein; K05917 cytochrome P450, family 51 (sterol 14-demethylase) [EC:1.14.13.70]	YHR007c	[Q] KOG0684 Cytochrome P450	sp|O14442|CP51_UNCNE	Eburicol 14-alpha-demethylase OS=Uncinula necator GN=CYP51 PE=2 SV=2	GO:0008398 ;GO:0070988 ;GO:0005506 ;GO:0020037 ;GO:0006696 ;GO:0032259 ;GO:0008168 ;GO:0005783 ;GO:0055114	CYP51	CYP51
Zoff157629	B	2030	9.44	7	215.9	0	0	1	0	4.93	0	1	1	17.38	0.46	0.4	10.71	0	0	0.05	0	0.25	0	0.05	0.05	0.88	3.85667	0.0166667	0.0833333	0.326667	gi|345565171|gb|EGX48124.1|	hypothetical protein AOL_s00081g120 [Arthrobotrys oligospora ATCC 24927]	act:ACLA_072970	Cytochrome P450 oxidoreductase, putative	Hs10834998	[Q] KOG0156 Cytochrome P450 CYP2 subfamily	sp|B8NHY4|ORDA_ASPFN	O-methylsterigmatocystin oxidoreductase OS=Aspergillus flavus (strain ATCC 200026 / FGSC A1120 / NRRL 3357 / JCM 12722 / SRRC 167) GN=ordA PE=2 SV=1	GO:0046872 ;GO:0016491	CYP	CYP
Zoff157859	A	687	0	0	0	0	0	0	8	0	7	0	0	0	0	0	0	0	0	0	0.39	0	0.35	0	0	0	0	0	0.246667	0	gi|660968052|gb|KEP52192.1|	cytochrome P450 family protein [Rhizoctonia solani 123E]	ppl:POSPLDRAFT_93354	hypothetical protein	CE01702	[Q] KOG0158 Cytochrome P450 CYP3/CYP5/CYP6/CYP9 subfamilies	sp|Q09653|C13AA_CAEEL	Putative cytochrome P450 CYP13A10 OS=Caenorhabditis elegans GN=cyp-13A10 PE=3 SV=3	GO:0020037 ;GO:0016705 ;GO:0004497 ;GO:0005506 ;GO:0055114	CYP13A	CYP13
Zoff157875	B	1980	679	671	1247	2824	1908	3336	1594	1051	2028	4599	909	1741	33.42	38.54	61.87	143.26	98.67	164.93	78.44	52.66	100.11	232.57	45.02	87.68	44.61	135.62	77.07	121.757	gi|695077280|ref|XP_009385971.1|	PREDICTED: cytochrome P450 89A2-like [Musa acuminata subsp. malaccensis]	vvi:100240884	hypothetical protein LOC100240884	At1g64940	[Q] KOG0156 Cytochrome P450 CYP2 subfamily	sp|Q42602|C89A2_ARATH	Cytochrome P450 89A2 OS=Arabidopsis thaliana GN=CYP89A2 PE=2 SV=2	GO:0016491 ;GO:0005488 ;GO:0016491 ;GO:0005488	CYP89A	CYP89
Zoff158307	B	3059	363	226	365	1042	392	347	706	987	1058	1501	220	505	17.87	12.98	18.11	52.86	20.27	17.15	34.74	49.45	52.22	75.9	10.9	25.43	16.32	30.0933	45.47	37.41	gi|313760499|dbj|BAJ41268.1|	NADPH-P450 reductase 1 [Zingiber officinale]	osa:4347838	Os09g0558900; K00327 NADPH-ferrihemoprotein reductase [EC:1.6.2.4]	At4g30210	[C] KOG1158 NADP/FAD dependent oxidoreductase	sp|Q05001|NCPR_CATRO	NADPH--cytochrome P450 reductase OS=Catharanthus roseus GN=CPR PE=2 SV=1	GO:0005789 ;GO:0003958 ;GO:0005506 ;GO:0010181 ;GO:0055114	CYP	CYP
Zoff158568	B	899	8	3	5	1	5	0	0	0	0	0	0	0	0.39	0.17	0.25	0.05	0.26	0	0	0	0	0	0	0	0.27	0.103333	0	0	gi|443925260|gb|ELU44133.1|	cytochrome P450 [Rhizoctonia solani AG-1 IA]	scm:SCHCODRAFT_104020	hypothetical protein	--	--	--	--	GO:0044710 ;GO:0003824	CYP	CYP
Zoff158569	B	399	2	0	0	0	0	0	0	0	0	0	0	0	0.1	0	0	0	0	0	0	0	0	0	0	0	0.0333333	0	0	0	gi|576986482|gb|EUC59218.1|	cytochrome P450 family protein, putative, partial [Rhizoctonia solani AG-3 Rhs1AP]	--	--	--	--	--	--	--	CYP	CYP
Zoff159241	A	414	0	0	0	0	0	0	0	0	0	0	0	6	0	0	0	0	0	0	0	0	0	0	0	0.3	0	0	0	0.1	gi|169866723|ref|XP_001839948.1|	O-methylsterigmatocystin oxidoreductase [Coprinopsis cinerea okayama7#130]	cci:CC1G_06138	O-methylsterigmatocystin oxidoreductase	Hs4503201	[Q] KOG0156 Cytochrome P450 CYP2 subfamily	sp|B8NHY4|ORDA_ASPFN	O-methylsterigmatocystin oxidoreductase OS=Aspergillus flavus (strain ATCC 200026 / FGSC A1120 / NRRL 3357 / JCM 12722 / SRRC 167) GN=ordA PE=2 SV=1	GO:0046872 ;GO:0016491 ;GO:0097159 ;GO:1901363	CYP	CYP
Zoff159242	B	946	0	0	0	0	0	0	0	1	0	0	0	0	0	0	0	0	0	0	0	0.05	0	0	0	0	0	0	0.0166667	0	gi|169866723|ref|XP_001839948.1|	O-methylsterigmatocystin oxidoreductase [Coprinopsis cinerea okayama7#130]	cci:CC1G_06138	O-methylsterigmatocystin oxidoreductase	At5g07990	[Q] KOG0156 Cytochrome P450 CYP2 subfamily	sp|B8NHY4|ORDA_ASPFN	O-methylsterigmatocystin oxidoreductase OS=Aspergillus flavus (strain ATCC 200026 / FGSC A1120 / NRRL 3357 / JCM 12722 / SRRC 167) GN=ordA PE=2 SV=1	GO:0016491 ;GO:0005488	CYP98A	CYP98
Zoff159243	B	946	0	0	0	0	0	0	0	0	0	0	0	12	0	0	0	0	0	0	0	0	0	0	0	0.6	0	0	0	0.2	gi|169866723|ref|XP_001839948.1|	O-methylsterigmatocystin oxidoreductase [Coprinopsis cinerea okayama7#130]	cci:CC1G_06138	O-methylsterigmatocystin oxidoreductase	At5g07990	[Q] KOG0156 Cytochrome P450 CYP2 subfamily	sp|B8NHY4|ORDA_ASPFN	O-methylsterigmatocystin oxidoreductase OS=Aspergillus flavus (strain ATCC 200026 / FGSC A1120 / NRRL 3357 / JCM 12722 / SRRC 167) GN=ordA PE=2 SV=1	GO:0016491 ;GO:0005488	CYP98A	CYP98
Zoff160314	B	1651	0	0	0	0	0	0	0	0	0	41	0	0	0	0	0	0	0	0	0	0	0	2.07	0	0	0	0	0	0.69	gi|630010905|ref|XP_007829438.1|	hypothetical protein PFICI_02666 [Pestalotiopsis fici W106-1]	ang:ANI_1_1154084	An09g02000; cytochrome P450	Hs16933533	[Q] KOG0158 Cytochrome P450 CYP3/CYP5/CYP6/CYP9 subfamilies	sp|Q00707|STCL_EMENI	Versicolorin B desaturase OS=Emericella nidulans (strain FGSC A4 / ATCC 38163 / CBS 112.46 / NRRL 194 / M139) GN=stcL PE=1 SV=2	GO:0016491 ;GO:0005488	CYP	CYP
Zoff160493	C	2666	0	0	2	0	0	2	0	0	0	116	1	0	0	0	0.1	0	0	0.1	0	0	0	5.87	0.05	0	0.0333333	0.0333333	0	1.97333	gi|302895465|ref|XP_003046613.1|	predicted protein [Nectria haematococca mpVI 77-13-4]	fgr:FG09786.1	hypothetical protein; K00327 NADPH-ferrihemoprotein reductase [EC:1.6.2.4]	SPBC365.17	[C] KOG1158 NADP/FAD dependent oxidoreductase	sp|Q4WM67|NCPR_ASPFU	NADPH--cytochrome P450 reductase OS=Neosartorya fumigata (strain ATCC MYA-4609 / Af293 / CBS 101355 / FGSC A1100) GN=cprA PE=1 SV=1	GO:0005789 ;GO:0003958 ;GO:0005506 ;GO:0010181 ;GO:0055114	CYP	CYP
Zoff160494	C	966	0	0	0	0	0	0	0	0	0	7	0	0	0	0	0	0	0	0	0	0	0	0.35	0	0	0	0	0	0.116667	gi|531989257|emb|CCT64101.1|	probable NCP1-NADPH-cytochrome P450 reductase [Fusarium fujikuroi IMI 58289]	fgr:FG09786.1	hypothetical protein; K00327 NADPH-ferrihemoprotein reductase [EC:1.6.2.4]	SPBC365.17	[C] KOG1158 NADP/FAD dependent oxidoreductase	sp|Q4WM67|NCPR_ASPFU	NADPH--cytochrome P450 reductase OS=Neosartorya fumigata (strain ATCC MYA-4609 / Af293 / CBS 101355 / FGSC A1100) GN=cprA PE=1 SV=1	GO:0005789 ;GO:0003958 ;GO:0005506 ;GO:0010181 ;GO:0055114	CYP	CYP
Zoff160495	C	836	0	0	0	0	0	1	0	0	0	0	0	11	0	0	0	0	0	0.05	0	0	0	0	0	0.55	0	0.0166667	0	0.183333	gi|591464371|gb|EXL95837.1|	NADPH-cytochrome P450 reductase [Fusarium oxysporum f. sp. cubense tropical race 4 54006]	fgr:FG09786.1	hypothetical protein; K00327 NADPH-ferrihemoprotein reductase [EC:1.6.2.4]	SPBC365.17	[C] KOG1158 NADP/FAD dependent oxidoreductase	sp|Q2UHA7|NCPR_ASPOR	NADPH--cytochrome P450 reductase OS=Aspergillus oryzae (strain ATCC 42149 / RIB 40) GN=cprA PE=3 SV=1	GO:0005789 ;GO:0003958 ;GO:0005506 ;GO:0010181 ;GO:0055114	CYP	CYP
Zoff161215	A	1592	1093.37	1443.67	2179.95	81.93	161	68.7	249.12	135	433.1	112	448.61	339.21	53.81	82.92	108.16	4.16	8.33	3.4	12.26	6.76	21.38	5.66	22.22	17.08	81.63	5.29667	13.4667	14.9867	gi|695040430|ref|XP_009407793.1|	PREDICTED: abscisic acid 8'-hydroxylase 1-like [Musa acuminata subsp. malaccensis]	rcu:RCOM_0814150	cytochrome P450, putative (EC:1.14.13.79); K09843 (+)-abscisic acid 8'-hydroxylase [EC:1.14.13.93]	At4g19230	[QI] KOG0157 Cytochrome P450 CYP4/CYP19/CYP26 subfamilies	sp|Q05JG2|ABAH1_ORYSJ	Abscisic acid 8'-hydroxylase 1 OS=Oryza sativa subsp. japonica GN=CYP707A5 PE=2 SV=1	GO:0020037 ;GO:0016705 ;GO:0004497 ;GO:0005506 ;GO:0055114 ;GO:0020037 ;GO:0016705 ;GO:0004497 ;GO:0005506 ;GO:0055114 ;GO:0020037 ;GO:0016705 ;GO:0004497 ;GO:0005506 ;GO:0055114	CYP707A	CYP707
Zoff165152	D	1781	2	5	1	2	8	9	1	0	4	0	1	9	0.1	0.29	0.05	0.1	0.41	0.44	0.05	0	0.2	0	0.05	0.45	0.146667	0.316667	0.0833333	0.166667	gi|598008073|ref|XP_007336243.1|	cytochrome P450 [Auricularia delicata TFB-10046 SS5]	lbc:LACBIDRAFT_300937	hypothetical protein	At3g14640	[QI] KOG0157 Cytochrome P450 CYP4/CYP19/CYP26 subfamilies	sp|Q9LUC8|C7A13_ARATH	Cytochrome P450 72A13 OS=Arabidopsis thaliana GN=CYP72A13 PE=2 SV=1	--	CYP72A	CYP72
Zoff168243	C	2056	63	0	1	0	0	1	0	0	0	0	0	0	3.1	0	0.05	0	0	0.05	0	0	0	0	0	0	1.05	0.0166667	0	0	gi|241557118|ref|XP_002400171.1|	cytochrome P450, putative [Ixodes scapularis]	isc:IscW_ISCW020316	cytochrome P450, putative (EC:1.6.2.4); K00327 NADPH-ferrihemoprotein reductase [EC:1.6.2.4]	7297099	[C] KOG1158 NADP/FAD dependent oxidoreductase	sp|Q07994|NCPR_MUSDO	NADPH--cytochrome P450 reductase OS=Musca domestica PE=2 SV=1	GO:0005789 ;GO:0003958 ;GO:0005506 ;GO:0010181 ;GO:0005509 ;GO:0055114	CYP	CYP
Zoff168625	A	1724	0	0	0	0	0	0	0	1	0	0	0	32	0	0	0	0	0	0	0	0.05	0	0	0	1.61	0	0	0.0166667	0.536667	gi|169856937|ref|XP_001835122.1|	cytochrome P450 [Coprinopsis cinerea okayama7#130]	cci:CC1G_06525	cytochrome P450	Hs4503199	[Q] KOG0156 Cytochrome P450 CYP2 subfamily	sp|B8NHY4|ORDA_ASPFN	O-methylsterigmatocystin oxidoreductase OS=Aspergillus flavus (strain ATCC 200026 / FGSC A1120 / NRRL 3357 / JCM 12722 / SRRC 167) GN=ordA PE=2 SV=1	GO:0046872 ;GO:0016491	CYP	CYP
Zoff169783	B	1834	1812	1130	1184	619	1316	723	259	1098	363	615	827	823	89.18	64.91	58.75	31.4	68.05	35.74	12.75	55.01	17.92	31.1	40.96	41.45	70.9467	45.0633	28.56	37.8367	gi|695033822|ref|XP_009404395.1|	PREDICTED: allene oxide synthase, chloroplastic [Musa acuminata subsp. malaccensis]	rcu:RCOM_1016730	cytochrome P450, putative (EC:4.2.1.92); K10528 hydroperoxide lyase [EC:4.1.2.-]	7302303	[Q] KOG0158 Cytochrome P450 CYP3/CYP5/CYP6/CYP9 subfamilies	sp|P48417|CP74_LINUS	Allene oxide synthase, chloroplastic OS=Linum usitatissimum GN=CYP74A PE=1 SV=1	GO:0044238 ;GO:0016829 ;GO:0032787 ;GO:0046872 ;GO:0016491 ;GO:0042430 ;GO:0044238 ;GO:0016829 ;GO:0032787 ;GO:0046872 ;GO:0016491 ;GO:0042430	CYP74A	CYP74
Zoff169960	C	2381	75	20	323	2	9	5	29	19	15	10	12	89	3.69	1.15	16.03	0.1	0.47	0.25	1.43	0.95	0.74	0.51	0.59	4.48	6.95667	0.273333	1.04	1.86	gi|628341577|ref|XP_007747670.1|	phenylacetate 2-hydroxylase [Cladophialophora psammophila CBS 110553]	nfi:NFIA_040380	cytochrome P450 phenylacetate 2-hydroxylase, putative; K10437 phenylacetate 2-hydroxylase [EC:1.14.13.-]	At4g37330	[Q] KOG0156 Cytochrome P450 CYP2 subfamily	sp|Q9Y7G5|PHACA_EMEND	Phenylacetate 2-hydroxylase OS=Emericella nidulans GN=phacA PE=1 SV=1	GO:0055114 ;GO:0042318 ;GO:0009055 ;GO:0010124 ;GO:0020037 ;GO:0018631 ;GO:0005506	CYP504	CYP504
Zoff169969	B	1783	209	218	43	6	8	6	98	312	151	131	180	268	10.29	12.52	2.13	0.3	0.41	0.3	4.82	15.63	7.45	6.62	8.91	13.5	8.31333	0.336667	9.3	9.67667	gi|695060575|ref|XP_009418682.1|	PREDICTED: geraniol 8-hydroxylase-like [Musa acuminata subsp. malaccensis]	sbi:SORBI_07g024990	hypothetical protein	At4g12300	[Q] KOG0156 Cytochrome P450 CYP2 subfamily	sp|Q8VWZ7|C76B6_CATRO	Geraniol 8-hydroxylase OS=Catharanthus roseus GN=CYP76B6 PE=1 SV=1	GO:0016491 ;GO:0005488	CYP76B	CYP76
Zoff171939	D	1786	17	17	41	9	13	9	16	11	9	154	12	12	0.84	0.98	2.03	0.46	0.67	0.44	0.79	0.55	0.44	7.79	0.59	0.6	1.28333	0.523333	0.593333	2.99333	gi|695038300|ref|XP_009406657.1|	PREDICTED: premnaspirodiene oxygenase-like [Musa acuminata subsp. malaccensis]	pop:POPTR_100844	CYP71D26; cytochrome P450	At5g57260	[Q] KOG0156 Cytochrome P450 CYP2 subfamily	sp|O48923|C71DA_SOYBN	Cytochrome P450 71D10 OS=Glycine max GN=CYP71D10 PE=2 SV=1	GO:0046872 ;GO:0016491 ;GO:0046872 ;GO:0016491	CYP71D	CYP71
Zoff172291	B	746	20	47	42	34	44	51	73	79	78	32	53	67	0.98	2.7	2.08	1.72	2.28	2.52	3.59	3.96	3.85	1.62	2.62	3.37	1.92	2.17333	3.8	2.53667	gi|695049172|ref|XP_009412514.1|	PREDICTED: allene oxide synthase 1, chloroplastic-like [Musa acuminata subsp. malaccensis]	pop:POPTR_644172	CYP74A1; cytochrome P450 allene oxide synthase (EC:4.2.1.92); K01723 hydroperoxide dehydratase [EC:4.2.1.92]	--	--	sp|P48417|CP74_LINUS	Allene oxide synthase, chloroplastic OS=Linum usitatissimum GN=CYP74A PE=1 SV=1	GO:0044272 ;GO:0006633 ;GO:0031407 ;GO:0016705 ;GO:1901362 ;GO:0005506 ;GO:1901135 ;GO:0047987 ;GO:0009753 ;GO:0009072 ;GO:0019438 ;GO:0033559 ;GO:0009694 ;GO:0006796 ;GO:0071229 ;GO:0019222 ;GO:0020037 ;GO:0019637 ;GO:0031347 ;GO:0007165 ;GO:0045087 ;GO:1901606 ;GO:0009534 ;GO:0055114 ;GO:0019748 ;GO:0071310 ;GO:0006732 ;GO:0004497 ;GO:0042430 ;GO:1901701 ;GO:1901566 ;GO:0016020 ;GO:0098542	CYP74A	CYP74
Zoff172292	D	1556	27	34	147	36	49	50	34	27	52	21	30	124	1.33	1.95	7.29	1.83	2.53	2.47	1.67	1.35	2.57	1.06	1.49	6.24	3.52333	2.27667	1.86333	2.93	gi|695005006|ref|XP_009388934.1|	PREDICTED: allene oxide synthase 1, chloroplastic-like [Musa acuminata subsp. malaccensis]	pop:POPTR_644172	CYP74A1; cytochrome P450 allene oxide synthase (EC:4.2.1.92); K01723 hydroperoxide dehydratase [EC:4.2.1.92]	Hs4758104	[Q] KOG0684 Cytochrome P450	sp|P48417|CP74_LINUS	Allene oxide synthase, chloroplastic OS=Linum usitatissimum GN=CYP74A PE=1 SV=1	GO:0009108 ;GO:0008652 ;GO:0009695 ;GO:0009697 ;GO:0016705 ;GO:0005506 ;GO:0010363 ;GO:0019761 ;GO:0010200 ;GO:0009684 ;GO:0047987 ;GO:0031348 ;GO:0050832 ;GO:0031408 ;GO:0019373 ;GO:0020037 ;GO:0009867 ;GO:0019288 ;GO:0009941 ;GO:0009595 ;GO:0042742 ;GO:0009416 ;GO:0006612 ;GO:0006569 ;GO:0009117 ;GO:0006636 ;GO:0010310 ;GO:0010287 ;GO:0005739 ;GO:0055114 ;GO:0009862 ;GO:0006766 ;GO:0009055 ;GO:…	CYP74A	CYP74
Zoff172464	C	1360	170.57	107	974.69	1731.87	316	2442.29	145	394.56	184	1346.62	117.6	386	8.4	6.15	48.36	87.85	16.34	120.74	7.14	19.77	9.08	68.1	5.82	19.44	20.97	74.9767	11.9967	31.12	gi|695056222|ref|XP_009416323.1|	PREDICTED: trans-cinnamate 4-monooxygenase-like [Musa acuminata subsp. malaccensis]	pop:POPTR_823837	C4H2, CYP73A42; cytochrome P450 cinnamate 4-hydroxylase (EC:1.14.13.11); K00487 trans-cinnamate 4-monooxygenase [EC:1.14.13.11]	At2g30490	[Q] KOG0156 Cytochrome P450 CYP2 subfamily	sp|Q42797|TCMO_SOYBN	Trans-cinnamate 4-monooxygenase OS=Glycine max GN=CYP73A11 PE=2 SV=1	GO:0020037 ;GO:0016710 ;GO:0005506 ;GO:0055114	CYP73A	CYP73
Zoff174271	B	1601	37	21.21	5.58	2	10.23	11	19	120	8.6	2.87	3	18	1.82	1.22	0.28	0.1	0.53	0.54	0.94	6.01	0.42	0.15	0.15	0.91	1.10667	0.39	2.45667	0.403333	gi|695047937|ref|XP_009411862.1|	PREDICTED: flavonoid 3',5'-hydroxylase 1-like [Musa acuminata subsp. malaccensis]	pop:POPTR_54623	CYP75A12, F3'5'H1; flavonoid 3',5'-hydroxylase (EC:1.14.13.88); K13083 cytochrome P450, family 75, subfamily A (flavonoid 3',5'-hydroxylase) [EC:1.14.13.88]	At5g07990	[Q] KOG0156 Cytochrome P450 CYP2 subfamily	sp|P48418|C75A1_PETHY	Flavonoid 3',5'-hydroxylase 1 OS=Petunia hybrida GN=CYP75A1 PE=2 SV=1	GO:0020037 ;GO:0016705 ;GO:0004497 ;GO:0005506 ;GO:0055114	CYP75A	CYP75
Zoff174272	B	678	0	1.79	0.42	0	7.77	0	0	0	1.4	4.13	0	0	0	0.1	0.02	0	0.4	0	0	0	0.07	0.21	0	0	0.04	0.133333	0.0233333	0.07	gi|695047937|ref|XP_009411862.1|	PREDICTED: flavonoid 3',5'-hydroxylase 1-like [Musa acuminata subsp. malaccensis]	vvi:100267840	similar to flavonoid 35 hydroxylase	At5g07990	[Q] KOG0156 Cytochrome P450 CYP2 subfamily	sp|P48418|C75A1_PETHY	Flavonoid 3',5'-hydroxylase 1 OS=Petunia hybrida GN=CYP75A1 PE=2 SV=1	GO:0020037 ;GO:0033772 ;GO:0005506 ;GO:0055114	CYP75A	CYP75
Zoff175599	A	1900	20	21	5	2	17	8	3	7	10	1	2	14	0.98	1.21	0.25	0.1	0.88	0.4	0.15	0.35	0.49	0.05	0.1	0.71	0.813333	0.46	0.33	0.286667	gi|656907425|gb|KEF53163.1|	hypothetical protein A1O9_10611 [Exophiala aquamarina CBS 119918]	mgr:MGG_09081	MG09081.4; hypothetical protein	At2g23220	[Q] KOG0156 Cytochrome P450 CYP2 subfamily	sp|A1DA63|FTME_NEOFI	Fumitremorgin C synthase OS=Neosartorya fischeri (strain ATCC 1020 / DSM 3700 / FGSC A1164 / NRRL 181) GN=ftmP450-2 PE=3 SV=1	GO:0020037 ;GO:0016705 ;GO:0004497 ;GO:0005506 ;GO:0055114	CYP2	CYP2
Zoff175999	A	1331	0	0	0	0	0	0	0	0	0	0	0	48	0	0	0	0	0	0	0	0	0	0	0	2.42	0	0	0	0.806667	gi|501143496|ref|WP_012191701.1|	cytochrome P450 [Herpetosiphon aurantiacus]	hau:Haur_4177	cytochrome P450	7290280	[QI] KOG0157 Cytochrome P450 CYP4/CYP19/CYP26 subfamilies	sp|Q27589|CP4D2_DROME	Cytochrome P450 4d2 OS=Drosophila melanogaster GN=Cyp4d2 PE=2 SV=2	--	CYP4D	CYP4
Zoff176319	B	1683	34	3	15.28	0	0	0	0	0	0	0	1	0	1.67	0.17	0.76	0	0	0	0	0	0	0	0.05	0	0.866667	0	0	0.0166667	gi|576989749|gb|EUC62468.1|	O-methylsterigmatocystin oxidoreductase [Rhizoctonia solani AG-3 Rhs1AP]	ppl:POSPLDRAFT_105726	hypothetical protein	At4g37360	[Q] KOG0156 Cytochrome P450 CYP2 subfamily	sp|O13345|ORDA_ASPPA	O-methylsterigmatocystin oxidoreductase OS=Aspergillus parasiticus GN=ordA PE=1 SV=1	GO:0046872 ;GO:0016491	CYP	CYP
Zoff177333	A	2537	12	5	78	1	1	0	2	1	1	3	0	11	0.59	0.29	3.87	0.05	0.05	0	0.1	0.05	0.05	0.15	0	0.55	1.58333	0.0333333	0.0666667	0.233333	gi|628318961|ref|XP_007742150.1|	hypothetical protein A1O5_03349 [Cladophialophora psammophila CBS 110553]	pcs:Pc14g00120	Pc14g00120	Hs4503233	[Q] KOG0158 Cytochrome P450 CYP3/CYP5/CYP6/CYP9 subfamilies	sp|Q12612|TRI4_FUSSP	Trichodiene oxygenase OS=Fusarium sporotrichioides GN=TRI4 PE=3 SV=1	GO:0020037 ;GO:0016705 ;GO:0004497 ;GO:0005506 ;GO:0055114 ;GO:0020037 ;GO:0016705 ;GO:0004497 ;GO:0005506 ;GO:0055114	CYP	CYP
Zoff177487	C	1125	89	63	65	13	33	21	25	50	17	31	29	43	4.38	3.62	3.23	0.66	1.71	1.04	1.23	2.51	0.84	1.57	1.44	2.17	3.74333	1.13667	1.52667	1.72667	gi|695071300|ref|XP_009382716.1|	PREDICTED: cytochrome P450 78A9-like [Musa acuminata subsp. malaccensis]	osa:4346234	Os08g0547300	At2g46660	[Q] KOG0156 Cytochrome P450 CYP2 subfamily	sp|Q9ZNR0|C78A6_ARATH	Cytochrome P450 78A6 OS=Arabidopsis thaliana GN=CYP78A6 PE=2 SV=1	GO:0046872 ;GO:0016705 ;GO:0004497	CYP78A	CYP78
Zoff178834	A	1791	19	1	41	2	2	0	3	1	0	1	0	5	0.94	0.06	2.03	0.1	0.1	0	0.15	0.05	0	0.05	0	0.25	1.01	0.0666667	0.0666667	0.1	gi|656907425|gb|KEF53163.1|	hypothetical protein A1O9_10611 [Exophiala aquamarina CBS 119918]	pno:SNOG_12709	hypothetical protein	At4g37320	[Q] KOG0156 Cytochrome P450 CYP2 subfamily	sp|Q4WAW8|FTME_ASPFU	Fumitremorgin C synthase OS=Neosartorya fumigata (strain ATCC MYA-4609 / Af293 / CBS 101355 / FGSC A1100) GN=ftmP450-2 PE=3 SV=1	GO:0020037 ;GO:0016705 ;GO:0004497 ;GO:0005506 ;GO:0055114	CYP2	CYP2
Zoff179053	B	1664	0	0	0	3	0	75	0	0	0	0	0	0	0	0	0	0.15	0	3.71	0	0	0	0	0	0	0	1.28667	0	0	gi|567988802|gb|ETL39074.1|	hypothetical protein L916_09500 [Phytophthora parasitica]	pif:PITG_21524	cytochrome P450, putative	At5g58860	[QI] KOG0157 Cytochrome P450 CYP4/CYP19/CYP26 subfamilies	sp|P48422|C86A1_ARATH	Cytochrome P450 86A1 OS=Arabidopsis thaliana GN=CYP86A1 PE=1 SV=2	--	CYP86A	CYP86
Zoff181006	C	1190	0	0	0	0	0	0	0	0	0	0	0	21	0	0	0	0	0	0	0	0	0	0	0	1.06	0	0	0	0.353333	gi|299743583|ref|XP_002910681.1|	cytochrome P450 oxidoreductase [Coprinopsis cinerea okayama7#130]	cci:CC1G_15012	cytochrome P450 oxidoreductase; K00327 NADPH-ferrihemoprotein reductase [EC:1.6.2.4]	SPBC365.17	[C] KOG1158 NADP/FAD dependent oxidoreductase	sp|Q9HDG2|NCPR_PHACH	NADPH--cytochrome P450 reductase OS=Phanerochaete chrysosporium GN=CPR PE=2 SV=1	GO:0005506 ;GO:0003958 ;GO:0055114 ;GO:0010181	CYP	CYP
Zoff181712	B	2121	576	517	642	5860	1566	3239	1745	901	1086	1921	1215	1591	28.35	29.7	31.85	297.27	80.98	160.13	85.87	45.14	53.61	97.14	60.18	80.12	29.9667	179.46	61.54	79.1467	gi|695013365|ref|XP_009393464.1|	PREDICTED: cytochrome P450 71A1-like [Musa acuminata subsp. malaccensis]	pop:POPTR_575255	CYP71AP4; cytochrome P450	At4g13310	[Q] KOG0156 Cytochrome P450 CYP2 subfamily	sp|P24465|C71A1_PERAE	Cytochrome P450 71A1 OS=Persea americana GN=CYP71A1 PE=1 SV=2	GO:0046872 ;GO:0016491	CYP71A	CYP71
Zoff182463	A	1864	46	6	9	3	4	14	0	0	0	0	0	6	2.26	0.34	0.45	0.15	0.21	0.69	0	0	0	0	0	0.3	1.01667	0.35	0	0.1	gi|660963577|gb|KEP48914.1|	cytochrome P450 family protein [Rhizoctonia solani 123E]	lbc:LACBIDRAFT_315758	cytochrome P450	At3g14660	[QI] KOG0157 Cytochrome P450 CYP4/CYP19/CYP26 subfamilies	sp|Q9LUC8|C7A13_ARATH	Cytochrome P450 72A13 OS=Arabidopsis thaliana GN=CYP72A13 PE=2 SV=1	GO:0020037 ;GO:0016705 ;GO:0004497 ;GO:0005506 ;GO:0055114	CYP72A	CYP72
Zoff183086	B	1607	12	19	64	5	0	1	7	27	7	1	0	11	0.59	1.09	3.18	0.25	0	0.05	0.34	1.35	0.35	0.05	0	0.55	1.62	0.1	0.68	0.2	gi|695039037|ref|XP_009407042.1|	PREDICTED: cytochrome P450 94B3-like [Musa acuminata subsp. malaccensis]	rcu:RCOM_1506510	cytochrome P450, putative (EC:1.14.14.1)	At3g48520	[QI] KOG0157 Cytochrome P450 CYP4/CYP19/CYP26 subfamilies	sp|Q9SMP5|C94B3_ARATH	Cytochrome P450 94B3 OS=Arabidopsis thaliana GN=CYP94B3 PE=2 SV=1	GO:0046872 ;GO:0016705 ;GO:0004497	CYP94B	CYP94
Zoff183088	B	933	62	33	28	7	29	13	52	123.01	64.01	15	22	90	3.05	1.9	1.39	0.36	1.5	0.64	2.56	6.16	3.16	0.76	1.09	4.53	2.11333	0.833333	3.96	2.12667	gi|695021619|ref|XP_009397903.1|	PREDICTED: cytochrome P450 86B1-like [Musa acuminata subsp. malaccensis]	sbi:SORBI_01g047630	hypothetical protein	At2g23180	[QI] KOG0157 Cytochrome P450 CYP4/CYP19/CYP26 subfamilies	sp|Q9FMY1|C86B1_ARATH	Cytochrome P450 86B1 OS=Arabidopsis thaliana GN=CYP86B1 PE=2 SV=1	GO:0005488 ;GO:0016491 ;GO:0016023	CYP86B	CYP86
Zoff184831	A	2923	0	2	29	0	2	1	0	1	2	1	0	10	0	0.11	1.44	0	0.1	0.05	0	0.05	0.1	0.05	0	0.5	0.516667	0.05	0.05	0.183333	gi|628351843|ref|XP_007750938.1|	hypothetical protein A1O5_12179 [Cladophialophora psammophila CBS 110553]	afv:AFLA_004370	cytochrome P450 oxidoreductase, putative	7290280	[QI] KOG0157 Cytochrome P450 CYP4/CYP19/CYP26 subfamilies	sp|O00061|CP67_UROFA	Cytochrome P450 67 (Fragment) OS=Uromyces fabae GN=CYP67 PE=2 SV=1	--	CYP67	CYP67
Zoff186456	C	2362	2493	1990	2318	2777	4196	2782	2868	2555	2879	2358	3705	3358	122.7	114.3	115.01	140.87	216.99	137.54	141.14	128.02	142.11	119.24	183.5	169.11	117.337	165.133	137.09	157.283	gi|695032489|ref|XP_009403793.1|	PREDICTED: obtusifoliol 14-alpha demethylase-like isoform X1 [Musa acuminata subsp. malaccensis]	sbi:SORBI_08g002250	hypothetical protein; K05917 cytochrome P450, family 51 (sterol 14-demethylase) [EC:1.14.13.70]	At1g11680	[Q] KOG0684 Cytochrome P450	sp|P93846|CP51_SORBI	Obtusifoliol 14-alpha demethylase OS=Sorghum bicolor GN=CYP51 PE=1 SV=1	GO:0009086 ;GO:0016021 ;GO:0022900 ;GO:0008398 ;GO:0009055 ;GO:0032259 ;GO:0020037 ;GO:0000394 ;GO:0008168 ;GO:0005506 ;GO:0070988 ;GO:0005794 ;GO:0005783 ;GO:0019745 ;GO:0005886 ;GO:0016126	CYP51	CYP51
Zoff186517	C	604	0	0	0	0	0	0	5	0	3	0	0	0	0	0	0	0	0	0	0.25	0	0.15	0	0	0	0	0	0.133333	0	gi|576992101|gb|EUC64781.1|	lanosterol 14-alpha-demethylase, partial [Rhizoctonia solani AG-3 Rhs1AP]	mpr:MPER_03805	hypothetical protein ; K05917 cytochrome P450, family 51 (sterol 14-demethylase) [EC:1.14.13.70]	SPAC13A11.02c	[Q] KOG0684 Cytochrome P450	sp|P49602|CP51_USTMA	Lanosterol 14-alpha demethylase OS=Ustilago maydis (strain 521 / FGSC 9021) GN=ERG11 PE=3 SV=1	GO:0020037 ;GO:0016705 ;GO:0004497 ;GO:0005506 ;GO:0032259 ;GO:0055114 ;GO:0008168	CYP51A	CYP51
Zoff186518	C	1343	6	3	0	0	0	0	2	3	2	0	0	3	0.3	0.17	0	0	0	0	0.1	0.15	0.1	0	0	0.15	0.156667	0	0.116667	0.05	gi|628354387|ref|XP_007751747.1|	cytochrome P450, family 51 (sterol 14-demethylase) [Cladophialophora psammophila CBS 110553]	afm:AFUA_7G03740	14-alpha sterol demethylase Cyp51B (EC:1.14.13.-); K05917 cytochrome P450, family 51 (sterol 14-demethylase) [EC:1.14.13.70]	YHR007c	[Q] KOG0684 Cytochrome P450	sp|O14442|CP51_UNCNE	Eburicol 14-alpha-demethylase OS=Uncinula necator GN=CYP51 PE=2 SV=2	GO:0035690 ;GO:0008144 ;GO:0020037 ;GO:0016705 ;GO:0004497 ;GO:0005506 ;GO:0032259 ;GO:0009055 ;GO:0055114 ;GO:0008168	CYP51	CYP51
Zoff186519	A	772	0	0	0	0	0	0	14	0	1	0	0	0	0	0	0	0	0	0	0.69	0	0.05	0	0	0	0	0	0.246667	0	gi|639573051|gb|KDN50436.1|	hypothetical protein RSAG8_00934, partial [Rhizoctonia solani AG-8 WAC10335]	lbc:LACBIDRAFT_234769	hypothetical protein; K05917 cytochrome P450, family 51 (sterol 14-demethylase) [EC:1.14.13.70]	YHR007c	[Q] KOG0684 Cytochrome P450	sp|P49602|CP51_USTMA	Lanosterol 14-alpha demethylase OS=Ustilago maydis (strain 521 / FGSC 9021) GN=ERG11 PE=3 SV=1	GO:0020037 ;GO:0016705 ;GO:0004497 ;GO:0005506 ;GO:0032259 ;GO:0055114 ;GO:0008168	CYP51A	CYP51
Zoff187095	A	2567	499	536	480	5	12	13	183	88	115	32	157	23	24.56	30.79	23.82	0.25	0.62	0.64	9.01	4.41	5.68	1.62	7.78	1.16	26.39	0.503333	6.36667	3.52	gi|695018141|ref|XP_009396020.1|	PREDICTED: cytochrome P450 90B1-like isoform X2 [Musa acuminata subsp. malaccensis]	vvi:100241065	hypothetical protein LOC100241065; K09587 cytochrome P450, family 90, subfamily B, polypeptide 1 (steroid 22-alpha-hydroxylase) [EC:1.14.13.-]	At3g50660	[QI] KOG0157 Cytochrome P450 CYP4/CYP19/CYP26 subfamilies	sp|O64989|C90B1_ARATH	Cytochrome P450 90B1 OS=Arabidopsis thaliana GN=CYP90B1 PE=1 SV=2	GO:0016132 ;GO:0010012 ;GO:0016021 ;GO:0055114 ;GO:0009867 ;GO:0010358 ;GO:0016705 ;GO:0009055 ;GO:0016023 ;GO:0020037 ;GO:0009826 ;GO:0005506 ;GO:0005783 ;GO:0016126 ;GO:0020037 ;GO:0016705 ;GO:0004497 ;GO:0005506 ;GO:0055114 ;GO:0016132 ;GO:0010012 ;GO:0016021 ;GO:0055114 ;GO:0009867 ;GO:0010358 ;GO:0016705 ;GO:0009055 ;GO:0020037 ;GO:0009826 ;GO:0005506 ;GO:0005783 ;GO:0016126 ;GO:0020037 ;GO:…	CYP90B	CYP90
Zoff187312	A	1028	0	0	0	0	0	0	0	0	0	0	0	23	0	0	0	0	0	0	0	0	0	0	0	1.16	0	0	0	0.386667	gi|397628557|gb|EJK68956.1|	hypothetical protein THAOC_09824 [Thalassiosira oceanica]	tps:THAPSDRAFT_269400	hypothetical protein	At4g15110	[QI] KOG0157 Cytochrome P450 CYP4/CYP19/CYP26 subfamilies	sp|Q8SPK0|CP4AP_PIG	Cytochrome P450 4A25 OS=Sus scrofa GN=CYP4A25 PE=2 SV=1	--	CYP4A	CYP4
Zoff187588	D	2170	72	75	91	142	118	76	108	135	119	180	46	105	3.54	4.31	4.52	7.2	6.1	3.76	5.31	6.76	5.87	9.1	2.28	5.29	4.12333	5.68667	5.98	5.55667	gi|514815467|ref|XP_004982488.1|	PREDICTED: ent-isokaurene C2-hydroxylase-like isoform X1 [Setaria italica]	sbi:SORBI_02g009410	hypothetical protein	At1g13080	[Q] KOG0156 Cytochrome P450 CYP2 subfamily	sp|O04164|C71A6_NEPRA	Cytochrome P450 71A6 (Fragment) OS=Nepeta racemosa GN=CYP71A6 PE=2 SV=1	GO:0005488 ;GO:0016491 ;GO:0016023	CYP71A	CYP71
Zoff188704	A	1783	5	13	7	13	4	5	17	13	29	4	0	0	0.25	0.75	0.35	0.66	0.21	0.25	0.84	0.65	1.43	0.2	0	0	0.45	0.373333	0.973333	0.0666667	gi|656905925|gb|KEF51671.1|	hypothetical protein A1O9_12306 [Exophiala aquamarina CBS 119918]	nfi:NFIA_047320	Cytochrome P450 oxidoreductase, putative	Hs4503201	[Q] KOG0156 Cytochrome P450 CYP2 subfamily	sp|Q4WAW8|FTME_ASPFU	Fumitremorgin C synthase OS=Neosartorya fumigata (strain ATCC MYA-4609 / Af293 / CBS 101355 / FGSC A1100) GN=ftmP450-2 PE=3 SV=1	GO:0020037 ;GO:0016705 ;GO:0004497 ;GO:0005506 ;GO:0055114	CYP2	CYP2
Zoff190360	C	1986	3816	2762	5921	6685	4303	6476	4435	5119	5165.99	10088	2313	3434	187.81	158.65	293.78	339.12	222.52	320.16	218.25	256.49	255	510.14	114.56	172.93	213.413	293.933	243.247	265.877	gi|695044564|ref|XP_009410039.1|	PREDICTED: trans-cinnamate 4-monooxygenase-like [Musa acuminata subsp. malaccensis]	pop:POPTR_823837	C4H2, CYP73A42; cytochrome P450 cinnamate 4-hydroxylase (EC:1.14.13.11); K00487 trans-cinnamate 4-monooxygenase [EC:1.14.13.11]	At2g30490	[Q] KOG0156 Cytochrome P450 CYP2 subfamily	sp|Q42797|TCMO_SOYBN	Trans-cinnamate 4-monooxygenase OS=Glycine max GN=CYP73A11 PE=2 SV=1	GO:0020037 ;GO:0016705 ;GO:0004497 ;GO:0005506 ;GO:0055114	CYP73A	CYP73
Zoff190642	D	2232	14	44	2021	5	11	5	37	21	7	18	9	221	0.69	2.53	100.28	0.25	0.57	0.25	1.82	1.05	0.35	0.91	0.45	11.13	34.5	0.356667	1.07333	4.16333	gi|656917044|gb|KEF62622.1|	hypothetical protein A1O9_00595 [Exophiala aquamarina CBS 119918]	act:ACLA_048760	cytochrome P450 monooxygenase, putative	Hs4503233	[Q] KOG0158 Cytochrome P450 CYP3/CYP5/CYP6/CYP9 subfamilies	sp|Q4WAW5|FTMC_ASPFU	Tryprostatin B 6-hydroxylase OS=Neosartorya fumigata (strain ATCC MYA-4609 / Af293 / CBS 101355 / FGSC A1100) GN=ftmP450-1 PE=3 SV=2	GO:0046872 ;GO:0016491	CYP	CYP
Zoff191425	B	1898	13	9	31	19	10	20	9	29	25	36	7	9	0.64	0.52	1.54	0.96	0.52	0.99	0.44	1.45	1.23	1.82	0.35	0.45	0.9	0.823333	1.04	0.873333	gi|672148609|ref|XP_008797199.1|	PREDICTED: cytochrome P450 86B1-like [Phoenix dactylifera]	sbi:SORBI_01g018855	hypothetical protein	At5g08250	[QI] KOG0157 Cytochrome P450 CYP4/CYP19/CYP26 subfamilies	sp|Q9FMY1|C86B1_ARATH	Cytochrome P450 86B1 OS=Arabidopsis thaliana GN=CYP86B1 PE=2 SV=1	GO:0020037 ;GO:0016705 ;GO:0004497 ;GO:0005506 ;GO:0055114 ;GO:0020037 ;GO:0016705 ;GO:0004497 ;GO:0005506 ;GO:0055114 ;GO:0020037 ;GO:0016705 ;GO:0004497 ;GO:0005506 ;GO:0055114	CYP86B	CYP86
Zoff191832	A	1766	92	1	0	0	0	0	0	0	0	0	0	0	4.53	0.06	0	0	0	0	0	0	0	0	0	0	1.53	0	0	0	gi|675383137|gb|KFM76034.1|	Cytochrome P450 3A24, partial [Stegodyphus mimosarum]	isc:IscW_ISCW006560	cytochrome P450, putative (EC:1.14.14.1)	Hs4507383	[Q] KOG0158 Cytochrome P450 CYP3/CYP5/CYP6/CYP9 subfamilies	sp|P49430|THAS_RAT	Thromboxane-A synthase OS=Rattus norvegicus GN=Tbxas1 PE=2 SV=1	GO:0016491	CYP3A	CYP3
Zoff192914	A	2083	39	33	136	62	101	158	34	63	18	44	216	109	1.92	1.9	6.75	3.15	5.22	7.81	1.67	3.16	0.89	2.23	10.7	5.49	3.52333	5.39333	1.90667	6.14	gi|695009538|ref|XP_009391406.1|	PREDICTED: cytokinin hydroxylase-like [Musa acuminata subsp. malaccensis]	rcu:RCOM_1725340	cytochrome P450, putative (EC:1.3.3.9); K10717 cytokinin trans-hydroxylase	At5g38450	[QI] KOG0157 Cytochrome P450 CYP4/CYP19/CYP26 subfamilies	sp|Q9FF18|C7351_ARATH	Cytokinin hydroxylase OS=Arabidopsis thaliana GN=CYP735A1 PE=1 SV=1	GO:0020037 ;GO:0016705 ;GO:0004497 ;GO:0005506 ;GO:0055114 ;GO:0020037 ;GO:0016705 ;GO:0004497 ;GO:0005506 ;GO:0055114 ;GO:0050616 ;GO:0020037 ;GO:0016705 ;GO:0004497 ;GO:0005506 ;GO:0055114 ;GO:0050616	CYP735A	CYP735
Zoff193687	A	894	14.16	0	0	0	0	0	0	0	0	0	0	0	0.7	0	0	0	0	0	0	0	0	0	0	0	0.233333	0	0	0	gi|675371108|gb|KFM64010.1|	Cytochrome P450 3A1, partial [Stegodyphus mimosarum]	mdo:100010820	similar to cytochrome P450 CYP3A70; K07424 cytochrome P450, family 3, subfamily A [EC:1.14.14.1]	Hs4503229	[Q] KOG0158 Cytochrome P450 CYP3/CYP5/CYP6/CYP9 subfamilies	sp|P33268|CP3A8_MACFA	Cytochrome P450 3A8 OS=Macaca fascicularis GN=CYP3A8 PE=1 SV=1	--	CYP3A	CYP3
Zoff193688	A	838	8.82	0	0	0	0	0	0	1	0	0	0	0	0.43	0	0	0	0	0	0	0.05	0	0	0	0	0.143333	0	0.0166667	0	gi|675389734|gb|KFM82631.1|	Cytochrome P450 3A13, partial [Stegodyphus mimosarum]	mmu:13112	Cyp3a11, AI256190, Cyp3a, IIIAm1, Pcn; cytochrome P450, family 3, subfamily a, polypeptide 11 (EC:1.14.14.1); K07424 cytochrome P450, family 3, subfamily A [EC:1.14.14.1]	Hs4503233	[Q] KOG0158 Cytochrome P450 CYP3/CYP5/CYP6/CYP9 subfamilies	sp|Q64459|CP3AB_MOUSE	Cytochrome P450 3A11 OS=Mus musculus GN=Cyp3a11 PE=1 SV=1	GO:0043227 ;GO:0004497 ;GO:0004497 ;GO:0043231	CYP3A	CYP3
Zoff193689	A	1780	54.02	0	0	0	0	0	0	0	0	0	0	0	2.66	0	0	0	0	0	0	0	0	0	0	0	0.886667	0	0	0	gi|675389734|gb|KFM82631.1|	Cytochrome P450 3A13, partial [Stegodyphus mimosarum]	mmu:13112	Cyp3a11, AI256190, Cyp3a, IIIAm1, Pcn; cytochrome P450, family 3, subfamily a, polypeptide 11 (EC:1.14.14.1); K07424 cytochrome P450, family 3, subfamily A [EC:1.14.14.1]	Hs4503231	[Q] KOG0158 Cytochrome P450 CYP3/CYP5/CYP6/CYP9 subfamilies	sp|Q64459|CP3AB_MOUSE	Cytochrome P450 3A11 OS=Mus musculus GN=Cyp3a11 PE=1 SV=1	GO:0004497 ;GO:0043227 ;GO:0004497	CYP3A	CYP3
Zoff194512	D	1722	13	0	54	13	5	2	163	5	164	17	1	20	0.64	0	2.68	0.66	0.26	0.1	8.02	0.25	8.1	0.86	0.05	1.01	1.10667	0.34	5.45667	0.64	gi|695040551|ref|XP_009407856.1|	PREDICTED: cytochrome P450 89A2-like [Musa acuminata subsp. malaccensis]	vvi:100240884	hypothetical protein LOC100240884	At1g64940	[Q] KOG0156 Cytochrome P450 CYP2 subfamily	sp|Q42602|C89A2_ARATH	Cytochrome P450 89A2 OS=Arabidopsis thaliana GN=CYP89A2 PE=2 SV=2	GO:0022900 ;GO:0004497 ;GO:0005488	CYP89A	CYP89
Zoff194646	B	871	7	1	25	0	0	0	1	1	0	0	1	9	0.34	0.06	1.24	0	0	0	0.05	0.05	0	0	0.05	0.45	0.546667	0	0.0333333	0.166667	gi|656912893|gb|KEF58475.1|	hypothetical protein A1O9_06401 [Exophiala aquamarina CBS 119918]	afv:AFLA_122250	cytochrome P450, putative	--	--	sp|P38364|PID6_FUSSO	Pisatin demethylase OS=Fusarium solani subsp. pisi GN=PDA6-1 PE=3 SV=1	GO:0020037 ;GO:0016705 ;GO:0004497 ;GO:0005506 ;GO:0055114	CYP	CYP
Zoff194647	A	1463	9	2	51	0	0	1	3	6	0	0	1	10	0.44	0.11	2.53	0	0	0.05	0.15	0.3	0	0	0.05	0.5	1.02667	0.0166667	0.15	0.183333	gi|671162337|ref|XP_008721635.1|	hypothetical protein G647_00010 [Cladophialophora carrionii CBS 160.54]	pno:SNOG_11796	hypothetical protein	At2g27690	[QI] KOG0157 Cytochrome P450 CYP4/CYP19/CYP26 subfamilies	sp|Q12645|PID9_FUSSO	Pisatin demethylase OS=Fusarium solani subsp. pisi GN=PDAT9 PE=3 SV=1	GO:0020037 ;GO:0016705 ;GO:0004497 ;GO:0005506 ;GO:0055114 ;GO:0020037 ;GO:0016705 ;GO:0004497 ;GO:0005506 ;GO:0055114	CYP	CYP
Zoff194738	C	3213	87	18	434	2	4	1	14	12	7	2	7	91	4.28	1.03	21.53	0.1	0.21	0.05	0.69	0.6	0.35	0.1	0.35	4.58	8.94667	0.12	0.546667	1.67667	gi|656907673|gb|KEF53410.1|	3-hydroxyphenylacetate 6-hydroxylase [Exophiala aquamarina CBS 119918]	ani:AN1397.2	hypothetical protein; K10438 3-hydroxyphenylacetate 6-hydroxylase [EC:1.14.13.63]	At2g23190	[Q] KOG0156 Cytochrome P450 CYP2 subfamily	sp|Q078T0|PHACB_EMEND	3-hydroxyphenylacetate 6-hydroxylase OS=Emericella nidulans GN=phacB PE=1 SV=1	GO:0020037 ;GO:0016705 ;GO:0004497 ;GO:0005506 ;GO:0055114	CYP2	CYP2
Zoff194824	C	591	0	0	0	0	0	0	0	0	0	0	0	5	0	0	0	0	0	0	0	0	0	0	0	0.25	0	0	0	0.0833333	gi|299740027|ref|XP_002910271.1|	hypothetical protein CC1G_15700 [Coprinopsis cinerea okayama7#130]	cci:CC1G_15700	hypothetical protein	Hs13435391	[QI] KOG0157 Cytochrome P450 CYP4/CYP19/CYP26 subfamilies	sp|Q6NT55|CP4FN_HUMAN	Cytochrome P450 4F22 OS=Homo sapiens GN=CYP4F22 PE=2 SV=1	GO:0046872 ;GO:0016491	CYP4F	CYP4
Zoff195866	C	931	0	0	0	10	0	0	0	0	0	0	0.5	0	0	0	0	0.51	0	0	0	0	0	0	0.02	0	0	0.17	0	0.00666667	gi|471901065|emb|CCO30019.1|	Cytochrome P450 3A6 [Rhizoctonia solani AG-1 IB]	scm:SCHCODRAFT_55859	hypothetical protein	At2g46950	[QI] KOG0157 Cytochrome P450 CYP4/CYP19/CYP26 subfamilies	sp|B9G934|C14C3_ORYSJ	Cytochrome P450 714C3 OS=Oryza sativa subsp. japonica GN=CYP714C3 PE=3 SV=2	GO:0046872 ;GO:0016491	CYP3A	CYP3
Zoff195867	C	931	0	0	0	4	0	0	0	0	0	0	0.5	0	0	0	0	0.2	0	0	0	0	0	0	0.02	0	0	0.0666667	0	0.00666667	gi|471901065|emb|CCO30019.1|	Cytochrome P450 3A6 [Rhizoctonia solani AG-1 IB]	scm:SCHCODRAFT_55859	hypothetical protein	At2g46950	[QI] KOG0157 Cytochrome P450 CYP4/CYP19/CYP26 subfamilies	sp|B9G934|C14C3_ORYSJ	Cytochrome P450 714C3 OS=Oryza sativa subsp. japonica GN=CYP714C3 PE=3 SV=2	GO:0046872 ;GO:0016491	CYP3A	CYP3
Zoff198560	A	1868	420	206	437	915	692	896	546	255	455	664	1006	539	20.67	11.83	21.68	46.42	35.79	44.3	26.87	12.78	22.46	33.58	49.82	27.14	18.06	42.17	20.7033	36.8467	gi|695075429|ref|XP_009384949.1|	PREDICTED: cytochrome P450 714B3-like [Musa acuminata subsp. malaccensis]	sbi:SORBI_01g036360	hypothetical protein	At5g24910	[QI] KOG0157 Cytochrome P450 CYP4/CYP19/CYP26 subfamilies	sp|B6SSW8|C14B3_MAIZE	Cytochrome P450 714B3 OS=Zea mays GN=CYP714B3 PE=2 SV=1	GO:0046872 ;GO:0016491 ;GO:0016023 ;GO:0046872 ;GO:0016491 ;GO:0016023	CYP714B	CYP714
Zoff198611	C	595	4	0	1	5	2	0	0	0	0	0	0	3	0.2	0	0.05	0.25	0.1	0	0	0	0	0	0	0.15	0.0833333	0.116667	0	0.05	gi|576994569|gb|EUC67164.1|	cytochrome P450 family sterol C-22 desaturase, putative [Rhizoctonia solani AG-3 Rhs1AP]	cci:CC1G_01671	C-22 sterol desaturase; K09831 C-22 sterol desaturase [EC:1.14.14.-]	SPAC19A8.04	[QI] KOG0157 Cytochrome P450 CYP4/CYP19/CYP26 subfamilies	sp|O13820|ERG5_SCHPO	Cytochrome P450 61 OS=Schizosaccharomyces pombe (strain 972 / ATCC 24843) GN=erg5 PE=1 SV=3	GO:0004497 ;GO:0005506 ;GO:0020037 ;GO:0005524 ;GO:0016705 ;GO:0055114	CYP61	CYP61
Zoff198612	A	1089	15	1	9	16	0	0	0	1	0	0	0	11	0.74	0.06	0.45	0.81	0	0	0	0.05	0	0	0	0.55	0.416667	0.27	0.0166667	0.183333	gi|576994569|gb|EUC67164.1|	cytochrome P450 family sterol C-22 desaturase, putative [Rhizoctonia solani AG-3 Rhs1AP]	lbc:LACBIDRAFT_187166	ERG5; cytochrome P450 sterol C22-desaturase; K09831 C-22 sterol desaturase [EC:1.14.14.-]	SPAC19A8.04	[QI] KOG0157 Cytochrome P450 CYP4/CYP19/CYP26 subfamilies	sp|O13820|ERG5_SCHPO	Cytochrome P450 61 OS=Schizosaccharomyces pombe (strain 972 / ATCC 24843) GN=erg5 PE=1 SV=3	GO:0004497 ;GO:0005506 ;GO:0020037 ;GO:0005524 ;GO:0016705 ;GO:0055114	CYP61	CYP61
Zoff198837	D	1843	488	178	37	51	156	108	107	562	90	40	49	56	24.02	10.22	1.84	2.59	8.07	5.34	5.27	28.16	4.44	2.02	2.43	2.82	12.0267	5.33333	12.6233	2.42333	gi|672203744|ref|XP_008778727.1|	PREDICTED: cytochrome P450 71A1-like [Phoenix dactylifera]	ath:AT3G26300	CYP71B34; electron carrier/ heme binding / iron ion binding / monooxygenase/ oxygen binding; K00517 [EC:1.14.-.-]	At3g26300	[Q] KOG0156 Cytochrome P450 CYP2 subfamily	sp|Q9LIP6|C71BV_ARATH	Cytochrome P450 71B34 OS=Arabidopsis thaliana GN=CYP71B34 PE=2 SV=1	GO:0005488 ;GO:0016491 ;GO:0005488	CYP71B	CYP71
Zoff202276	A	315	0	0	0	0	0	0	0	0	0	0	0	0	0	0	0	0	0	0	0	0	0	0	0	0	0	0	0	0	gi|695038687|ref|XP_009406861.1|	PREDICTED: cytochrome P450 714B2-like [Musa acuminata subsp. malaccensis]	pop:POPTR_353295	CYP714E5v2; cytochrome P450	At5g24910	[QI] KOG0157 Cytochrome P450 CYP4/CYP19/CYP26 subfamilies	sp|B6SSW8|C14B3_MAIZE	Cytochrome P450 714B3 OS=Zea mays GN=CYP714B3 PE=2 SV=1	GO:0005488 ;GO:0016491 ;GO:0016023	CYP714B	CYP714
Zoff202278	A	2065	78	76.44	48.37	1	11	6	39	25.79	27	54	12.82	21.73	3.84	4.39	2.4	0.05	0.57	0.3	1.92	1.29	1.33	2.73	0.63	1.09	3.54333	0.306667	1.51333	1.48333	gi|695038687|ref|XP_009406861.1|	PREDICTED: cytochrome P450 714B2-like [Musa acuminata subsp. malaccensis]	sbi:SORBI_01g036360	hypothetical protein	At5g24910	[QI] KOG0157 Cytochrome P450 CYP4/CYP19/CYP26 subfamilies	sp|B6SSW8|C14B3_MAIZE	Cytochrome P450 714B3 OS=Zea mays GN=CYP714B3 PE=2 SV=1	GO:0046872 ;GO:0016491 ;GO:0016023 ;GO:0016020 ;GO:0046872 ;GO:0016491 ;GO:0016023 ;GO:0005488 ;GO:0016491	CYP714B	CYP714
Zoff202279	A	355	4	1	0	0	0	1	1	2	2	1	1	0	0.2	0.06	0	0	0	0.05	0.05	0.1	0.1	0.05	0.05	0	0.0866667	0.0166667	0.0833333	0.0333333	gi|695038687|ref|XP_009406861.1|	PREDICTED: cytochrome P450 714B2-like [Musa acuminata subsp. malaccensis]	zma:100274525	hypothetical protein LOC100274525	At5g24900	[QI] KOG0157 Cytochrome P450 CYP4/CYP19/CYP26 subfamilies	sp|B6SSW8|C14B3_MAIZE	Cytochrome P450 714B3 OS=Zea mays GN=CYP714B3 PE=2 SV=1	GO:0046872 ;GO:0016491	CYP714B	CYP714
Zoff202280	A	896	0	4.56	4.63	0	0	0	0	5.21	0	0	3.18	1.27	0	0.26	0.23	0	0	0	0	0.26	0	0	0.16	0.06	0.163333	0	0.0866667	0.0733333	gi|695038687|ref|XP_009406861.1|	PREDICTED: cytochrome P450 714B2-like [Musa acuminata subsp. malaccensis]	sbi:SORBI_01g036360	hypothetical protein	At5g24910	[QI] KOG0157 Cytochrome P450 CYP4/CYP19/CYP26 subfamilies	sp|B6SSW8|C14B3_MAIZE	Cytochrome P450 714B3 OS=Zea mays GN=CYP714B3 PE=2 SV=1	GO:0046872 ;GO:0016491 ;GO:0016023 ;GO:0016020	CYP714B	CYP714
Zoff202616	B	1725	0	0	0	2	0	168	0	0	0	0	0	0	0	0	0	0.1	0	8.31	0	0	0	0	0	0	0	2.80333	0	0	gi|695415529|ref|XP_009526586.1|	hypothetical protein PHYSODRAFT_314852 [Phytophthora sojae]	pif:PITG_14013	cytochrome P450, putative	At1g34540	[QI] KOG0157 Cytochrome P450 CYP4/CYP19/CYP26 subfamilies	sp|Q9C788|C70B1_ARATH	Cytochrome P450 704B1 OS=Arabidopsis thaliana GN=CYP704B1 PE=2 SV=1	--	CYP704B	CYP704
Zoff203202	C	1948	33	2	4	21	1	8	0	0	0	0	0	3	1.62	0.11	0.2	1.07	0.05	0.4	0	0	0	0	0	0.15	0.643333	0.506667	0	0.05	gi|660960954|gb|KEP47352.1|	cytochrome P450 family monooxygenase [Rhizoctonia solani 123E]	scm:SCHCODRAFT_56510	hypothetical protein	At3g56630	[QI] KOG0157 Cytochrome P450 CYP4/CYP19/CYP26 subfamilies	sp|Q12573|CP52W_CANAP	Cytochrome P450 52E2 OS=Candida apicola GN=CYP52E2 PE=3 SV=1	GO:0020037 ;GO:0016705 ;GO:0004497 ;GO:0005506 ;GO:0055114	CYP63	CYP63
Zoff203766	A	2337	7775	4970	10409	26653	21047	32727	7715	4737	8470	15112	14912	14365	382.67	285.47	516.47	1352.05	1088.4	1617.96	379.66	237.35	418.09	764.2	738.55	723.42	394.87	1352.8	345.033	742.057	gi|695014749|ref|XP_009394213.1|	PREDICTED: cytochrome P450 CYP72A219-like isoform X2 [Musa acuminata subsp. malaccensis]	sbi:SORBI_03g028600	hypothetical protein	At3g14690	[QI] KOG0157 Cytochrome P450 CYP4/CYP19/CYP26 subfamilies	sp|H2DH21|C7A29_PANGI	Cytochrome P450 CYP72A219 OS=Panax ginseng PE=2 SV=1	GO:0046872 ;GO:0016023 ;GO:0004497 ;GO:0022900	CYP72A	CYP72
Zoff204672	B	2046	3089	3775	6209	1522	934	1387	3686	5974	3290	2215	5373	4806	152.03	216.83	308.07	77.21	48.3	68.57	181.39	299.33	162.4	112.01	266.11	242.03	225.643	64.6933	214.373	206.717	gi|695005006|ref|XP_009388934.1|	PREDICTED: allene oxide synthase 1, chloroplastic-like [Musa acuminata subsp. malaccensis]	pop:POPTR_644172	CYP74A1; cytochrome P450 allene oxide synthase (EC:4.2.1.92); K01723 hydroperoxide dehydratase [EC:4.2.1.92]	--	--	sp|P48417|CP74_LINUS	Allene oxide synthase, chloroplastic OS=Linum usitatissimum GN=CYP74A PE=1 SV=1	GO:0009108 ;GO:0008652 ;GO:0009695 ;GO:0009697 ;GO:0016705 ;GO:0005506 ;GO:0010363 ;GO:0019761 ;GO:0010200 ;GO:0009684 ;GO:0047987 ;GO:0031348 ;GO:0050832 ;GO:0031408 ;GO:0019373 ;GO:0020037 ;GO:0009867 ;GO:0019288 ;GO:0009941 ;GO:0009595 ;GO:0042742 ;GO:0009416 ;GO:0006612 ;GO:0006569 ;GO:0009117 ;GO:0006636 ;GO:0010310 ;GO:0010287 ;GO:0005739 ;GO:0055114 ;GO:0009862 ;GO:0006766 ;GO:0009055 ;GO:…	CYP74A	CYP74
Zoff204745	A	1796	235	199	292	217	172	201	198	244	207	197	122	284	11.57	11.43	14.49	11.01	8.89	9.94	9.74	12.23	10.22	9.96	6.04	14.3	12.4967	9.94667	10.73	10.1	gi|695015849|ref|XP_009394815.1|	PREDICTED: cytochrome P450 72A15-like [Musa acuminata subsp. malaccensis]	sbi:SORBI_03g028600	hypothetical protein	At3g14650	[QI] KOG0157 Cytochrome P450 CYP4/CYP19/CYP26 subfamilies	sp|Q05047|C72A1_CATRO	Secologanin synthase OS=Catharanthus roseus GN=CYP72A1 PE=2 SV=1	GO:0046872 ;GO:0016491	CYP72A	CYP72
Zoff205848	C	2204	795	438	163	103	227	319	221	395	351	659	410	455	39.13	25.16	8.09	5.22	11.74	15.77	10.88	19.79	17.33	33.32	20.31	22.91	24.1267	10.91	16	25.5133	gi|694995451|ref|XP_009388744.1|	PREDICTED: cytochrome P450 78A5-like [Musa acuminata subsp. malaccensis]	vvi:100249034	hypothetical protein LOC100249034	At1g13710	[Q] KOG0156 Cytochrome P450 CYP2 subfamily	sp|Q9LMX7|C78A5_ARATH	Cytochrome P450 78A5 OS=Arabidopsis thaliana GN=CYP78A5 PE=2 SV=1	GO:0051239 ;GO:0048638 ;GO:0046872 ;GO:0048518 ;GO:0048367 ;GO:0035265 ;GO:0016491 ;GO:0048513 ;GO:0016020 ;GO:0048437 ;GO:0016021 ;GO:0010338 ;GO:0055114 ;GO:0010075 ;GO:0016705 ;GO:0009055 ;GO:0004497 ;GO:0046622 ;GO:0040009 ;GO:0020037 ;GO:0008284 ;GO:0005506 ;GO:0005783 ;GO:0048437 ;GO:0016021 ;GO:0010338 ;GO:0055114 ;GO:0010075 ;GO:0016705 ;GO:0009055 ;GO:0004497 ;GO:0046622 ;GO:0040009 ;GO:…	CYP78A	CYP78
Zoff205902	A	1599	144	86	96	8	20	22	44	1	45	0	52	21	7.09	4.94	4.76	0.41	1.03	1.09	2.17	0.05	2.22	0	2.58	1.06	5.59667	0.843333	1.48	1.21333	gi|695071858|ref|XP_009383021.1|	PREDICTED: cytochrome P450 734A6-like [Musa acuminata subsp. malaccensis]	osa:4344024	Os07g0635500	At2g46950	[QI] KOG0157 Cytochrome P450 CYP4/CYP19/CYP26 subfamilies	sp|B9X287|C7346_ORYSJ	Cytochrome P450 734A6 OS=Oryza sativa subsp. japonica GN=CYP734A6 PE=2 SV=1	GO:0020037 ;GO:0016705 ;GO:0004497 ;GO:0005506 ;GO:0055114 ;GO:0046872 ;GO:0016491	CYP734A	CYP734
Zoff206943	B	3252	2179	3683	4880	254	321	528	899	1198	1698	1156	4411	7005	107.24	211.55	242.13	12.88	16.6	26.1	44.24	60.03	83.82	58.46	218.46	352.77	186.973	18.5267	62.6967	209.897	gi|672199702|ref|XP_008777682.1|	PREDICTED: cytochrome P450 704C1-like [Phoenix dactylifera]	vvi:100245370	hypothetical protein LOC100245370	At2g45510	[QI] KOG0157 Cytochrome P450 CYP4/CYP19/CYP26 subfamilies	sp|Q50EK3|C04C1_PINTA	Cytochrome P450 704C1 OS=Pinus taeda GN=CYP704C1 PE=2 SV=1	GO:0046872 ;GO:0016491	CYP704C	CYP704
Zoff207855	A	2156	32	3	262	3	1	2	35	2	3	6	0	15	1.57	0.17	13	0.15	0.05	0.1	1.72	0.1	0.15	0.3	0	0.76	4.91333	0.1	0.656667	0.353333	gi|628323733|ref|XP_007742968.1|	hypothetical protein A1O5_04170 [Cladophialophora psammophila CBS 110553]	bfu:BC1G_06047	hypothetical protein	CE01659	[Q] KOG0158 Cytochrome P450 CYP3/CYP5/CYP6/CYP9 subfamilies	sp|Q12645|PID9_FUSSO	Pisatin demethylase OS=Fusarium solani subsp. pisi GN=PDAT9 PE=3 SV=1	GO:0020037 ;GO:0016705 ;GO:0004497 ;GO:0005506 ;GO:0055114	CYP	CYP
Zoff208168	C	1735	4	0	15	11	3	3	0	6	1	17	0	0	0.2	0	0.74	0.56	0.16	0.15	0	0.3	0.05	0.86	0	0	0.313333	0.29	0.116667	0.286667	gi|380495878|emb|CCF32060.1|	NADPH-cytochrome P450 reductase [Colletotrichum higginsianum]	ncr:NCU09741	NADPH-cytochrome P450 reductase; K00327 NADPH-ferrihemoprotein reductase [EC:1.6.2.4]	SPBC365.17	[C] KOG1158 NADP/FAD dependent oxidoreductase	sp|A2QS05|NCPR_ASPNC	NADPH--cytochrome P450 reductase OS=Aspergillus niger (strain CBS 513.88 / FGSC A1513) GN=cprA PE=3 SV=1	GO:0005789 ;GO:0003958 ;GO:0005506 ;GO:0010181 ;GO:0055114 ;GO:0005789 ;GO:0003958 ;GO:0005506 ;GO:0010181 ;GO:0055114	CYP	CYP
Zoff208739	A	1455	1	1	0	0	0	0	0	1	0	58	0	0	0.05	0.06	0	0	0	0	0	0.05	0	2.93	0	0	0.0366667	0	0.0166667	0.976667	gi|302882331|ref|XP_003040076.1|	predicted protein [Nectria haematococca mpVI 77-13-4]	fgr:FG01972.1	C505_FUSOX Bifunctional P-450:NADPH-P450 reductase (Fatty acid omega-hydroxylase) (P450foxy); K14338 cytochrome P450 / NADPH-cytochrome P450 reductase [EC:1.14.14.1 1.6.2.4]	Hs6005737	[QI] KOG0157 Cytochrome P450 CYP4/CYP19/CYP26 subfamilies	sp|Q9Y8G7|C505_FUSOX	Bifunctional P-450:NADPH-P450 reductase OS=Fusarium oxysporum GN=CYP505 PE=1 SV=1	GO:0020037 ;GO:0005506 ;GO:0003958 ;GO:0070330 ;GO:0055114 ;GO:0010181	CYP505	CYP505
Zoff208742	C	2217	0	0	0	0	0	0	1	1	0	214	0	0	0	0	0	0	0	0	0.05	0.05	0	10.82	0	0	0	0	0.0333333	3.60667	gi|302882331|ref|XP_003040076.1|	predicted protein [Nectria haematococca mpVI 77-13-4]	fgr:FG01972.1	C505_FUSOX Bifunctional P-450:NADPH-P450 reductase (Fatty acid omega-hydroxylase) (P450foxy); K14338 cytochrome P450 / NADPH-cytochrome P450 reductase [EC:1.14.14.1 1.6.2.4]	At4g24520	[C] KOG1158 NADP/FAD dependent oxidoreductase	sp|Q9Y8G7|C505_FUSOX	Bifunctional P-450:NADPH-P450 reductase OS=Fusarium oxysporum GN=CYP505 PE=1 SV=1	GO:0003958 ;GO:0005506 ;GO:0010181 ;GO:0020037 ;GO:0016020 ;GO:0070330 ;GO:0055114	CYP505	CYP505
Zoff210416	A	2044	8	2	298	1	0	2	5	2	1	0	0	12	0.39	0.11	14.79	0.05	0	0.1	0.25	0.1	0.05	0	0	0.6	5.09667	0.05	0.133333	0.2	gi|302881637|ref|XP_003039729.1|	hypothetical protein NECHADRAFT_50013 [Nectria haematococca mpVI 77-13-4]	ncr:NCU04089	hypothetical protein	CE01655	[Q] KOG0158 Cytochrome P450 CYP3/CYP5/CYP6/CYP9 subfamilies	sp|Q12645|PID9_FUSSO	Pisatin demethylase OS=Fusarium solani subsp. pisi GN=PDAT9 PE=3 SV=1	GO:0046872 ;GO:0008152 ;GO:0016491	CYP	CYP
Zoff211626	B	2148	1946	1169	3197	3006	3145	3170	817	978	666	1008	2305	1372	95.78	67.15	158.63	152.49	162.64	156.72	40.21	49	32.87	50.97	114.16	69.09	107.187	157.283	40.6933	78.0733	gi|695013202|ref|XP_009393377.1|	PREDICTED: cytochrome P450 94C1-like [Musa acuminata subsp. malaccensis]	osa:9271540	Os01g0858350	At2g27690	[QI] KOG0157 Cytochrome P450 CYP4/CYP19/CYP26 subfamilies	sp|Q9ZUX1|C94C1_ARATH	Cytochrome P450 94C1 OS=Arabidopsis thaliana GN=CYP94C1 PE=2 SV=1	GO:0071229 ;GO:0022900 ;GO:0009753 ;GO:0009628 ;GO:0016705 ;GO:1901701 ;GO:0004497 ;GO:0016023 ;GO:0009755 ;GO:0020037 ;GO:0005506 ;GO:0006950 ;GO:0071229 ;GO:0022900 ;GO:0009753 ;GO:0009628 ;GO:0046872 ;GO:0016705 ;GO:1901701 ;GO:0004497 ;GO:0016023 ;GO:0009755 ;GO:0006950	CYP94C	CYP94
Zoff211809	A	1860	996	923	838	1015	4252	1000	1505	1114	1268	801	2446	1412	49.02	53.02	41.58	51.49	219.88	49.44	74.06	55.82	62.59	40.51	121.14	71.11	47.8733	106.937	64.1567	77.5867	gi|672118667|ref|XP_008782548.1|	PREDICTED: ent-kaurene oxidase, chloroplastic-like [Phoenix dactylifera]	rcu:RCOM_1592560	ent-kaurene oxidase, putative (EC:1.14.13.78); K04122 ent-kaurene oxidase [EC:1.14.13.78]	At5g25900	[Q] KOG0156 Cytochrome P450 CYP2 subfamily	sp|Q5Z5R4|C7016_ORYSJ	Ent-kaurene oxidase 2 OS=Oryza sativa subsp. japonica GN=CYP701A6 PE=1 SV=1	GO:0016021 ;GO:0052615 ;GO:0052616 ;GO:0009055 ;GO:0020037 ;GO:0009686 ;GO:0009740 ;GO:0009707 ;GO:0005506 ;GO:0005783 ;GO:0010241 ;GO:0052617	CYP701A	CYP701
Zoff212988	D	1763	28	28	30	30	29	26	25	13	33	46	18	40	1.38	1.61	1.49	1.52	1.5	1.29	1.23	0.65	1.63	2.33	0.89	2.01	1.49333	1.43667	1.17	1.74333	gi|672162319|ref|XP_008800986.1|	PREDICTED: cytochrome P450 89A2-like [Phoenix dactylifera]	rcu:RCOM_1517780	cytochrome P450, putative (EC:1.14.14.1)	At1g64940	[Q] KOG0156 Cytochrome P450 CYP2 subfamily	sp|Q9SRQ1|C89A9_ARATH	Cytochrome P450 89A9 OS=Arabidopsis thaliana GN=CYP89A9 PE=2 SV=1	--	CYP89A	CYP89
Zoff212989	D	1644	10	0	9	16	11	10	4	11	4	5	4	6	0.49	0	0.45	0.81	0.57	0.49	0.2	0.55	0.2	0.25	0.2	0.3	0.313333	0.623333	0.316667	0.25	gi|695040551|ref|XP_009407856.1|	PREDICTED: cytochrome P450 89A2-like [Musa acuminata subsp. malaccensis]	pop:POPTR_558572	CYP89A18; cytochrome P450	At1g64940	[Q] KOG0156 Cytochrome P450 CYP2 subfamily	sp|Q42602|C89A2_ARATH	Cytochrome P450 89A2 OS=Arabidopsis thaliana GN=CYP89A2 PE=2 SV=2	GO:0046872 ;GO:0016705 ;GO:0004497	CYP89A	CYP89
Zoff213273	A	2074	77	16	1042	7	4	4	5	14	6	4	3	172	3.79	0.92	51.7	0.36	0.21	0.2	0.25	0.7	0.3	0.2	0.15	8.66	18.8033	0.256667	0.416667	3.00333	gi|729186962|emb|CEJ87076.1|	hypothetical protein VHEMI04293 [Torrubiella hemipterigena]	ssl:SS1G_07180	hypothetical protein	Hs5729796	[QI] KOG0157 Cytochrome P450 CYP4/CYP19/CYP26 subfamilies	sp|Q4WAW5|FTMC_ASPFU	Tryprostatin B 6-hydroxylase OS=Neosartorya fumigata (strain ATCC MYA-4609 / Af293 / CBS 101355 / FGSC A1100) GN=ftmP450-1 PE=3 SV=2	GO:0046872 ;GO:0016491 ;GO:0046872 ;GO:0016491	CYP	CYP
Zoff213818	A	2046	7	6	201	2	0	0	0	2	0	5	3	21	0.34	0.34	9.97	0.1	0	0	0	0.1	0	0.25	0.15	1.06	3.55	0.0333333	0.0333333	0.486667	gi|656907425|gb|KEF53163.1|	hypothetical protein A1O9_10611 [Exophiala aquamarina CBS 119918]	pno:SNOG_12709	hypothetical protein	At4g37330	[Q] KOG0156 Cytochrome P450 CYP2 subfamily	sp|O13345|ORDA_ASPPA	O-methylsterigmatocystin oxidoreductase OS=Aspergillus parasiticus GN=ordA PE=1 SV=1	GO:0020037 ;GO:0016705 ;GO:0004497 ;GO:0005506 ;GO:0055114	CYP	CYP
Zoff214499	A	2105	5387	3640	3346	3973	5954	3023	3745	1340	4569	3153	2668	3092	265.13	209.08	166.02	201.54	307.9	149.45	184.3	67.14	225.53	159.44	132.14	155.71	213.41	219.63	158.99	149.097	gi|695033844|ref|XP_009404407.1|	PREDICTED: cytochrome P450 CYP72A219-like [Musa acuminata subsp. malaccensis]	vvi:100254391	hypothetical protein LOC100254391	At3g14690	[QI] KOG0157 Cytochrome P450 CYP4/CYP19/CYP26 subfamilies	sp|Q9LUC5|C7A15_ARATH	Cytochrome P450 72A15 OS=Arabidopsis thaliana GN=CYP72A15 PE=2 SV=1	GO:0046872 ;GO:0016491	CYP72A	CYP72
Zoff214873	D	2753	12	15.18	48	0	22	0	12	12	5	2	2	18	0.59	0.87	2.38	0	1.14	0	0.59	0.6	0.25	0.1	0.1	0.91	1.28	0.38	0.48	0.37	gi|656913904|gb|KEF59484.1|	benzoate 4-monooxygenase [Exophiala aquamarina CBS 119918]	cpw:CPC735_015320	Benzoate 4-monooxygenase, putative (EC:1.14.13.12); K07824 benzoate 4-monooxygenase [EC:1.14.13.12]	Hs4503233	[Q] KOG0158 Cytochrome P450 CYP3/CYP5/CYP6/CYP9 subfamilies	sp|P17549|CP53_ASPNG	Benzoate 4-monooxygenase OS=Aspergillus niger GN=bphA PE=1 SV=1	GO:0020037 ;GO:0005506 ;GO:0018664 ;GO:0055114	CYP	CYP
Zoff215340	B	2113	253	968	1641	5	5	12	87	206	141	34	182	2196	12.45	55.6	81.42	0.25	0.26	0.59	4.28	10.32	6.96	1.72	9.01	110.59	49.8233	0.366667	7.18667	40.44	gi|695014477|ref|XP_009394066.1|	PREDICTED: cytochrome P450 94B3-like [Musa acuminata subsp. malaccensis]	rcu:RCOM_1506510	cytochrome P450, putative (EC:1.14.14.1)	At5g63450	[QI] KOG0157 Cytochrome P450 CYP4/CYP19/CYP26 subfamilies	sp|Q9FMV7|C94B1_ARATH	Cytochrome P450 94B1 OS=Arabidopsis thaliana GN=CYP94B1 PE=2 SV=1	GO:0046872 ;GO:0016705 ;GO:0004497	CYP94B	CYP94
Zoff215808	A	3002	901	686.4	634	448	649	463	775	587	526.31	567	766	394	44.34	39.43	31.46	22.73	33.56	22.89	38.14	29.41	25.98	28.67	37.94	19.84	38.41	26.3933	31.1767	28.8167	gi|695067090|ref|XP_009380454.1|	PREDICTED: cytochrome P450 711A1 [Musa acuminata subsp. malaccensis]	vvi:100243924	hypothetical protein LOC100243924	At2g26170	[Q] KOG0158 Cytochrome P450 CYP3/CYP5/CYP6/CYP9 subfamilies	sp|B9DFU2|MAX1_ARATH	Cytochrome P450 711A1 OS=Arabidopsis thaliana GN=CYP711A1 PE=2 SV=1	GO:0009934 ;GO:0009611 ;GO:0016117 ;GO:0009805 ;GO:0010363 ;GO:0020037 ;GO:0009055 ;GO:0006612 ;GO:0016705 ;GO:0004497 ;GO:0005506 ;GO:0016021 ;GO:0009926 ;GO:0010223 ;GO:0055114	CYP711A	CYP711
Zoff216312	A	2133	5542	4239	7489	653	2728	2273	3186	2344	1538	2069	5091	1848	272.76	243.48	371.58	33.13	141.07	112.37	156.79	117.45	75.92	104.63	252.14	93.06	295.94	95.5233	116.72	149.943	gi|695007269|ref|XP_009390176.1|	PREDICTED: abscisic acid 8'-hydroxylase 4 [Musa acuminata subsp. malaccensis]	vvi:100267651	hypothetical protein LOC100267651	At1g19630	[QI] KOG0157 Cytochrome P450 CYP4/CYP19/CYP26 subfamilies	sp|Q9LJK2|ABAH4_ARATH	Abscisic acid 8'-hydroxylase 4 OS=Arabidopsis thaliana GN=CYP707A4 PE=2 SV=2	GO:0046872 ;GO:0016491	CYP707A	CYP707
Zoff217872	D	2842	0	0	0	6	0	109	0	0	0	0	1	0	0	0	0	0.3	0	5.39	0	0	0	0	0.05	0	0	1.89667	0	0.0166667	gi|570983851|gb|ETP43605.1|	hypothetical protein F442_09690 [Phytophthora parasitica P10297]	pif:PITG_14013	cytochrome P450, putative	At1g34540	[QI] KOG0157 Cytochrome P450 CYP4/CYP19/CYP26 subfamilies	sp|P48422|C86A1_ARATH	Cytochrome P450 86A1 OS=Arabidopsis thaliana GN=CYP86A1 PE=1 SV=2	--	CYP86A	CYP86
Zoff218253	B	2255	0	0	0	7	0	88.47	0	0	0	0	0	1.29	0	0	0	0.36	0	4.37	0	0	0	0	0	0.06	0	1.57667	0	0.02	gi|695406721|ref|XP_009524184.1|	hypothetical protein PHYSODRAFT_360099 [Phytophthora sojae]	pif:PITG_10160	NADPH-cytochrome P450 reductase, putative; K00327 NADPH-ferrihemoprotein reductase [EC:1.6.2.4]	Hs22049499	[C] KOG1158 NADP/FAD dependent oxidoreductase	sp|P37039|NCPR_CAVPO	NADPH--cytochrome P450 reductase OS=Cavia porcellus GN=POR PE=2 SV=2	GO:0016491 ;GO:0005506 ;GO:0010181 ;GO:0044444 ;GO:0055114	CYP	CYP
Zoff218255	B	679	0	0	0	0	0	5.53	0	0	0	0	0	0.71	0	0	0	0	0	0.27	0	0	0	0	0	0.04	0	0.09	0	0.0133333	gi|301107231|ref|XP_002902698.1|	NADPH-cytochrome P450 reductase, putative [Phytophthora infestans T30-4]	pif:PITG_10173	NADPH-cytochrome P450 reductase, putative	Hs22049499	[C] KOG1158 NADP/FAD dependent oxidoreductase	sp|Q55CT1|REDB_DICDI	NADPH oxidoreductase B OS=Dictyostelium discoideum GN=redB PE=2 SV=1	GO:0042221 ;GO:0051716 ;GO:0006629 ;GO:0043231 ;GO:0044281 ;GO:0080090 ;GO:0000166 ;GO:0050662 ;GO:0090346 ;GO:0005515 ;GO:0055114 ;GO:0050794 ;GO:0044763 ;GO:0003958 ;GO:0043168 ;GO:0016020 ;GO:0032770	CYP	CYP
Zoff218506	C	1671	199	214	282	167	239	244	219	304	274	219	187	200	9.79	12.29	13.99	8.47	12.36	12.06	10.78	15.23	13.53	11.07	9.26	10.07	12.0233	10.9633	13.18	10.1333	gi|695077659|ref|XP_009386181.1|	PREDICTED: geraniol 8-hydroxylase-like [Musa acuminata subsp. malaccensis]	sbi:SORBI_07g024990	hypothetical protein	At4g12300	[Q] KOG0156 Cytochrome P450 CYP2 subfamily	sp|Q8VWZ7|C76B6_CATRO	Geraniol 8-hydroxylase OS=Catharanthus roseus GN=CYP76B6 PE=1 SV=1	GO:0046872 ;GO:0016491 ;GO:0016023 ;GO:0016023 ;GO:0004497 ;GO:0005506 ;GO:0020037 ;GO:0016705 ;GO:0055114	CYP76B	CYP76
Zoff218902	B	2061	339	272	628	409	350	190	311	287	245	517	207	445	16.68	15.62	31.16	20.75	18.1	9.39	15.3	14.38	12.09	26.14	10.25	22.41	21.1533	16.08	13.9233	19.6	gi|695048565|ref|XP_009412197.1|	PREDICTED: flavonoid 3',5'-hydroxylase 1-like [Musa acuminata subsp. malaccensis]	pop:POPTR_64620	CYP75A13; cytochrome P450 flavonoid 3',5'-hydroxylase (EC:1.14.13.88); K13083 cytochrome P450, family 75, subfamily A (flavonoid 3',5'-hydroxylase) [EC:1.14.13.88]	At5g07990	[Q] KOG0156 Cytochrome P450 CYP2 subfamily	sp|P48418|C75A1_PETHY	Flavonoid 3',5'-hydroxylase 1 OS=Petunia hybrida GN=CYP75A1 PE=2 SV=1	GO:0046872 ;GO:0016491 ;GO:0046872 ;GO:0016491	CYP75A	CYP75
Zoff218990	A	1073	1	0	22	0	0	0	0	0	0	0	0	0	0.05	0	1.09	0	0	0	0	0	0	0	0	0	0.38	0	0	0	gi|533186205|ref|XP_005406120.1|	PREDICTED: cytochrome P450 4F6-like [Chinchilla lanigera]	pon:100173089	CYP4F12, DKFZp469H0334; cytochrome P450, family 4, subfamily F, polypeptide 12 (EC:1.14.14.1)	Hs13184046	[QI] KOG0157 Cytochrome P450 CYP4/CYP19/CYP26 subfamilies	sp|Q9HCS2|CP4FC_HUMAN	Cytochrome P450 4F12 OS=Homo sapiens GN=CYP4F12 PE=1 SV=2	--	CYP4F	CYP4
Zoff219541	C	2322	52	14	102	1	0	0	9	5	4	11	1	57	2.56	0.8	5.06	0.05	0	0	0.44	0.25	0.2	0.56	0.05	2.87	2.80667	0.0166667	0.296667	1.16	gi|628350581|ref|XP_007750544.1|	C-22 sterol desaturase [Cladophialophora psammophila CBS 110553]	cpw:CPC735_068810	C-22 sterol desaturase, putative (EC:1.14.14.-); K09831 C-22 sterol desaturase [EC:1.14.14.-]	SPAC19A8.04	[QI] KOG0157 Cytochrome P450 CYP4/CYP19/CYP26 subfamilies	sp|O13820|ERG5_SCHPO	Cytochrome P450 61 OS=Schizosaccharomyces pombe (strain 972 / ATCC 24843) GN=erg5 PE=1 SV=3	GO:0055114 ;GO:0006281 ;GO:0016705 ;GO:0003677 ;GO:0004497 ;GO:0005524 ;GO:0004386 ;GO:0020037 ;GO:0005506 ;GO:0005634	CYP61	CYP61
Zoff219587	B	1838	596	247	54	23	222	122	258	1462	384	90	111	160	29.33	14.19	2.68	1.17	11.48	6.03	12.7	73.25	18.95	4.55	5.5	8.06	15.4	6.22667	34.9667	6.03667	gi|695011275|ref|XP_009392348.1|	PREDICTED: cytochrome P450 71A1-like [Musa acuminata subsp. malaccensis]	rcu:RCOM_1508240	cytochrome P450, putative (EC:1.14.13.68)	At4g13310	[Q] KOG0156 Cytochrome P450 CYP2 subfamily	sp|P37117|C71A4_SOLME	Cytochrome P450 71A4 OS=Solanum melongena GN=CYP71A4 PE=2 SV=1	GO:0016705 ;GO:0004497 ;GO:0005488	CYP71A	CYP71
Zoff219843	D	1005	0	0	0.97	0	0	0	0	0	0	17.52	0	3.73	0	0	0.05	0	0	0	0	0	0	0.89	0	0.19	0.0166667	0	0	0.36	gi|695038298|ref|XP_009406656.1|	PREDICTED: premnaspirodiene oxygenase-like [Musa acuminata subsp. malaccensis]	osa:4341633	Os06g0642500	At3g26210	[Q] KOG0156 Cytochrome P450 CYP2 subfamily	sp|A6YIH8|C7D55_HYOMU	Premnaspirodiene oxygenase OS=Hyoscyamus muticus GN=CYP71D55 PE=1 SV=1	GO:0046872 ;GO:0016491	CYP71D	CYP71
Zoff219844	B	2402	93	80	127.03	312	313	152	440	378	479	273.48	128	168.27	4.58	4.6	6.3	15.83	16.19	7.51	21.65	18.94	23.64	13.83	6.34	8.47	5.16	13.1767	21.41	9.54667	gi|695038298|ref|XP_009406656.1|	PREDICTED: premnaspirodiene oxygenase-like [Musa acuminata subsp. malaccensis]	sbi:SORBI_04g005760	hypothetical protein	At5g07990	[Q] KOG0156 Cytochrome P450 CYP2 subfamily	sp|A6YIH8|C7D55_HYOMU	Premnaspirodiene oxygenase OS=Hyoscyamus muticus GN=CYP71D55 PE=1 SV=1	GO:0046872 ;GO:0016491	CYP71D	CYP71
Zoff220685	A	2116	8699	6736	7245	7009	6403	9649.99	6964	7647	5269	10894	10309	6480	428.14	386.91	359.48	355.55	331.12	477.08	342.71	383.15	260.09	550.9	510.57	326.33	391.51	387.917	328.65	462.6	gi|672124651|ref|XP_008785718.1|	PREDICTED: cytochrome P450 CYP72A219-like [Phoenix dactylifera]	sbi:SORBI_03g028600	hypothetical protein	At3g14690	[QI] KOG0157 Cytochrome P450 CYP4/CYP19/CYP26 subfamilies	sp|Q9LUC5|C7A15_ARATH	Cytochrome P450 72A15 OS=Arabidopsis thaliana GN=CYP72A15 PE=2 SV=1	GO:0046872 ;GO:0016491	CYP72A	CYP72
Zoff221293	D	1581	995	814	1960	3536	1672	3901	1970	2028	2160	7567	1219	1598	48.97	46.76	97.25	179.37	86.46	192.86	96.95	101.61	106.62	382.66	60.37	80.47	64.3267	152.897	101.727	174.5	gi|695051829|ref|XP_009413956.1|	PREDICTED: cytochrome P450 98A2 [Musa acuminata subsp. malaccensis]	pop:POPTR_685839	CYP98A27; cytochrome P450; K09754 p-coumarate 3-hydroxylase [EC:1.14.13.-]	At2g40890	[Q] KOG0156 Cytochrome P450 CYP2 subfamily	sp|O48922|C98A2_SOYBN	Cytochrome P450 98A2 OS=Glycine max GN=CYP98A2 PE=2 SV=1	GO:0020037 ;GO:0016021 ;GO:0005506 ;GO:0016711 ;GO:0055114 ;GO:0009805 ;GO:0016021 ;GO:0055114 ;GO:0005739 ;GO:0009611 ;GO:0016705 ;GO:0042802 ;GO:0009055 ;GO:0009963 ;GO:0020037 ;GO:0009809 ;GO:0046409 ;GO:0005506 ;GO:0005783 ;GO:0005886	CYP98A	CYP98
Zoff221390	A	2355	75	35	1067	5	2	2	29	31	7	23	8	225	3.69	2.01	52.94	0.25	0.1	0.1	1.43	1.55	0.35	1.16	0.4	11.33	19.5467	0.15	1.11	4.29667	gi|656915235|gb|KEF60814.1|	hypothetical protein A1O9_02376 [Exophiala aquamarina CBS 119918]	pno:SNOG_12709	hypothetical protein	At4g37330	[Q] KOG0156 Cytochrome P450 CYP2 subfamily	sp|O13345|ORDA_ASPPA	O-methylsterigmatocystin oxidoreductase OS=Aspergillus parasiticus GN=ordA PE=1 SV=1	GO:0020037 ;GO:0016705 ;GO:0004497 ;GO:0005506 ;GO:0055114	CYP	CYP
Zoff221441	A	2346	790	579	547	360	610	344	346	330	345	363	464	364	38.88	33.26	27.14	18.26	31.54	17.01	17.03	16.53	17.03	18.36	22.98	18.33	33.0933	22.27	16.8633	19.89	gi|695068783|ref|XP_009381346.1|	PREDICTED: cytochrome P450 714C2-like [Musa acuminata subsp. malaccensis]	osa:4351346	Os12g0119000	At5g24910	[QI] KOG0157 Cytochrome P450 CYP4/CYP19/CYP26 subfamilies	sp|Q2QYH7|C14C2_ORYSJ	Cytochrome P450 714C2 OS=Oryza sativa subsp. japonica GN=CYP714C2 PE=2 SV=1	GO:0046872 ;GO:0016491 ;GO:0016023 ;GO:0016020 ;GO:0046872 ;GO:0016491 ;GO:0016023 ;GO:0016020 ;GO:0046872 ;GO:0016491 ;GO:0016023 ;GO:0016020 ;GO:0046872 ;GO:0016491 ;GO:0016023 ;GO:0016020 ;GO:0046872 ;GO:0016491 ;GO:0016023 ;GO:0016020	CYP714C	CYP714
Zoff222216	B	1897	538	396	535	902	947	996	721	712	839	678	734	557	26.48	22.75	26.55	45.76	48.97	49.24	35.48	35.67	41.41	34.29	36.35	28.05	25.26	47.99	37.52	32.8967	gi|694995621|ref|XP_009389623.1|	PREDICTED: cytochrome P450 704C1-like [Musa acuminata subsp. malaccensis]	osa:4336728	Os04g0573900	At2g45510	[QI] KOG0157 Cytochrome P450 CYP4/CYP19/CYP26 subfamilies	sp|Q50EK3|C04C1_PINTA	Cytochrome P450 704C1 OS=Pinus taeda GN=CYP704C1 PE=2 SV=1	GO:0020037 ;GO:0016705 ;GO:0004497 ;GO:0005506 ;GO:0055114	CYP704C	CYP704
Zoff223817	B	1659	102	69	62	105	122	97	299	90	411	39	61	132	5.02	3.96	3.08	5.33	6.31	4.8	14.71	4.51	20.29	1.97	3.02	6.65	4.02	5.48	13.17	3.88	gi|672149026|ref|XP_008797233.1|	PREDICTED: cytochrome P450 89A2-like, partial [Phoenix dactylifera]	rcu:RCOM_1517780	cytochrome P450, putative (EC:1.14.14.1)	At1g64940	[Q] KOG0156 Cytochrome P450 CYP2 subfamily	sp|Q42602|C89A2_ARATH	Cytochrome P450 89A2 OS=Arabidopsis thaliana GN=CYP89A2 PE=2 SV=2	GO:0016491	CYP89A	CYP89
Zoff223896	B	1704	0	0	0	0	0	187	0	1	1	0	0	0	0	0	0	0	0	9.24	0	0.05	0.05	0	0	0	0	3.08	0.0333333	0	gi|325182055|emb|CCA16508.1|	unnamed protein product [Albugo laibachii Nc14]	pif:PITG_03059	cytochrome P450, putative	At2g45510	[QI] KOG0157 Cytochrome P450 CYP4/CYP19/CYP26 subfamilies	sp|Q50EK3|C04C1_PINTA	Cytochrome P450 704C1 OS=Pinus taeda GN=CYP704C1 PE=2 SV=1	--	CYP704C	CYP704
Zoff223897	B	1874	0	0	0	3	0	61	0	0	0	0	0	0	0	0	0	0.15	0	3.02	0	0	0	0	0	0	0	1.05667	0	0	gi|570981640|gb|ETP42023.1|	hypothetical protein F442_11037 [Phytophthora parasitica P10297]	pif:PITG_03059	cytochrome P450, putative	At2g45510	[QI] KOG0157 Cytochrome P450 CYP4/CYP19/CYP26 subfamilies	sp|Q50EK3|C04C1_PINTA	Cytochrome P450 704C1 OS=Pinus taeda GN=CYP704C1 PE=2 SV=1	--	CYP704C	CYP704
Zoff224396	C	553	6	4	15	108	13	34	0	7	3	186	2	17	0.3	0.23	0.74	5.48	0.67	1.68	0	0.35	0.15	9.41	0.1	0.86	0.423333	2.61	0.166667	3.45667	gi|403399730|sp|E3W9C4.1|C71A1_ZINZE	RecName: Full=Alpha-humulene 10-hydroxylase [Zingiber zerumbet]	vvi:100246036	hypothetical protein LOC100246036	At4g13310	[Q] KOG0156 Cytochrome P450 CYP2 subfamily	sp|E3W9C4|C71A1_ZINZE	Alpha-humulene 10-hydroxylase OS=Zingiber zerumbet GN=CYP71BA1 PE=1 SV=1	GO:0016491 ;GO:0005488	CYP71B	CYP71
Zoff224397	A	1962	2586	2023	2160	6235	6620	5198	5793	3992	6438	4162	4789	4914	127.28	116.2	107.17	316.29	342.34	256.98	285.08	200.02	317.79	210.47	237.19	247.47	116.883	305.203	267.63	231.71	gi|695014749|ref|XP_009394213.1|	PREDICTED: cytochrome P450 CYP72A219-like isoform X2 [Musa acuminata subsp. malaccensis]	sbi:SORBI_03g028600	hypothetical protein	At3g14690	[QI] KOG0157 Cytochrome P450 CYP4/CYP19/CYP26 subfamilies	sp|H2DH21|C7A29_PANGI	Cytochrome P450 CYP72A219 OS=Panax ginseng PE=2 SV=1	GO:0046872 ;GO:0016023 ;GO:0004497 ;GO:0022900 ;GO:0046872 ;GO:0016023 ;GO:0004497 ;GO:0022900	CYP72A	CYP72
Zoff224398	B	825	59	54	36	1384.16	694.3	796.29	526	70	274	1168.5	46	181	2.9	3.1	1.79	70.22	35.9	39.37	25.89	3.51	13.53	59.09	2.28	9.12	2.59667	48.4967	14.31	23.4967	gi|403399730|sp|E3W9C4.1|C71A1_ZINZE	RecName: Full=Alpha-humulene 10-hydroxylase [Zingiber zerumbet]	vvi:100246036	hypothetical protein LOC100246036	At5g25130	[Q] KOG0156 Cytochrome P450 CYP2 subfamily	sp|E3W9C4|C71A1_ZINZE	Alpha-humulene 10-hydroxylase OS=Zingiber zerumbet GN=CYP71BA1 PE=1 SV=1	GO:0016491 ;GO:0005488 ;GO:0016491 ;GO:0005488 ;GO:0046872 ;GO:0016491 ;GO:0020037 ;GO:0016705 ;GO:0004497 ;GO:0005506 ;GO:0055114 ;GO:0020037 ;GO:0016705 ;GO:0004497 ;GO:0005506 ;GO:0055114	CYP71B	CYP71
Zoff224399	B	351	0	5	5	5.07	11	4	11	2	7	50.84	2	4	0	0.29	0.25	0.26	0.57	0.2	0.54	0.1	0.35	2.57	0.1	0.2	0.18	0.343333	0.33	0.956667	gi|403399730|sp|E3W9C4.1|C71A1_ZINZE	RecName: Full=Alpha-humulene 10-hydroxylase [Zingiber zerumbet]	vvi:100263449	hypothetical protein LOC100263449	At3g26220	[Q] KOG0156 Cytochrome P450 CYP2 subfamily	sp|E3W9C4|C71A1_ZINZE	Alpha-humulene 10-hydroxylase OS=Zingiber zerumbet GN=CYP71BA1 PE=1 SV=1	GO:0020037 ;GO:0016021 ;GO:0016705 ;GO:0004497 ;GO:0005506 ;GO:0055114	CYP71B	CYP71
Zoff224401	B	1295	129	121	178	4915.77	2183.7	1854.71	621	111	250	2190.66	114	313	6.35	6.95	8.83	249.37	112.93	91.69	30.56	5.56	12.34	110.78	5.65	15.76	7.37667	151.33	16.1533	44.0633	gi|403399730|sp|E3W9C4.1|C71A1_ZINZE	RecName: Full=Alpha-humulene 10-hydroxylase [Zingiber zerumbet]	vvi:100246293	hypothetical protein LOC100246293	At3g26300	[Q] KOG0156 Cytochrome P450 CYP2 subfamily	sp|E3W9C4|C71A1_ZINZE	Alpha-humulene 10-hydroxylase OS=Zingiber zerumbet GN=CYP71BA1 PE=1 SV=1	GO:0016020 ;GO:0046872 ;GO:0016491 ;GO:0016020 ;GO:0046872 ;GO:0016491 ;GO:0016020 ;GO:0046872 ;GO:0016491 ;GO:0046872 ;GO:0016491	CYP71B	CYP71
Zoff224449	B	849	490	443	1598	413	359	444	934	1225	1184	3040	172	552	24.12	25.45	79.29	20.95	18.56	21.95	45.96	61.38	58.44	153.73	8.52	27.8	42.9533	20.4867	55.26	63.35	gi|694999984|ref|XP_009409655.1|	PREDICTED: cytochrome P450 71A1-like [Musa acuminata subsp. malaccensis]	ath:AT3G48280	CYP71A25; electron carrier/ heme binding / iron ion binding / monooxygenase/ oxygen binding	At4g13310	[Q] KOG0156 Cytochrome P450 CYP2 subfamily	sp|Q9STK8|C71AP_ARATH	Cytochrome P450 71A25 OS=Arabidopsis thaliana GN=CYP71A25 PE=2 SV=1	GO:0005488 ;GO:0016491 ;GO:0005794	CYP71A	CYP71
Zoff224450	D	801	685	696	2106	741	490	626	1131	1701	1558	4034	235	854	33.71	39.98	104.49	37.59	25.34	30.95	55.66	85.23	76.91	204	11.64	43.01	59.3933	31.2933	72.6	86.2167	gi|694999984|ref|XP_009409655.1|	PREDICTED: cytochrome P450 71A1-like [Musa acuminata subsp. malaccensis]	vvi:100253593	hypothetical protein LOC100253593	At2g45550	[Q] KOG0156 Cytochrome P450 CYP2 subfamily	sp|P24465|C71A1_PERAE	Cytochrome P450 71A1 OS=Persea americana GN=CYP71A1 PE=1 SV=2	GO:0046872 ;GO:0044699 ;GO:0016491 ;GO:0031090 ;GO:0005783 ;GO:0044425	CYP71A	CYP71
Zoff224886	A	1935	1818	773	1444	15	58	25	881	2109	401	810	300	254	89.48	44.4	71.65	0.76	3	1.24	43.36	105.67	19.79	40.96	14.86	12.79	68.51	1.66667	56.2733	22.87	gi|695042434|ref|XP_009408870.1|	PREDICTED: cytochrome P450 711A1-like [Musa acuminata subsp. malaccensis]	osa:4341325	Os06g0565100; K00517 [EC:1.14.-.-]	At2g26170	[Q] KOG0158 Cytochrome P450 CYP3/CYP5/CYP6/CYP9 subfamilies	sp|B9DFU2|MAX1_ARATH	Cytochrome P450 711A1 OS=Arabidopsis thaliana GN=CYP711A1 PE=2 SV=1	GO:0044763 ;GO:0016491 ;GO:0046872 ;GO:0044710 ;GO:0065007 ;GO:0009653 ;GO:0048731 ;GO:0044763 ;GO:0016020 ;GO:0016491 ;GO:1901576 ;GO:0046872 ;GO:0044711 ;GO:0044765 ;GO:0050789 ;GO:0006950 ;GO:0044249	CYP711A	CYP711
Zoff224934	B	1700	1	10	5	13	12	6	35	298	66	53	25	16	0.05	0.57	0.25	0.66	0.62	0.3	1.72	14.93	3.26	2.68	1.24	0.81	0.29	0.526667	6.63667	1.57667	gi|695003010|ref|XP_009383226.1|	PREDICTED: cytochrome P450 78A6-like [Musa acuminata subsp. malaccensis]	osa:4346234	Os08g0547300	At2g46660	[Q] KOG0156 Cytochrome P450 CYP2 subfamily	sp|Q9ZNR0|C78A6_ARATH	Cytochrome P450 78A6 OS=Arabidopsis thaliana GN=CYP78A6 PE=2 SV=1	GO:0046872 ;GO:0016705 ;GO:0004497 ;GO:0046872 ;GO:0016705 ;GO:0004497	CYP78A	CYP78
Zoff225560	C	1222	0	0	0	0	0	0	1	0	0	76	0	0	0	0	0	0	0	0	0.05	0	0	3.84	0	0	0	0	0.0166667	1.28	gi|302916541|ref|XP_003052081.1|	predicted protein [Nectria haematococca mpVI 77-13-4]	fgr:FG06068.1	hypothetical protein	CE18566	[QI] KOG0157 Cytochrome P450 CYP4/CYP19/CYP26 subfamilies	sp|O13317|TRI11_FUSSP	Isotrichodermin C-15 hydroxylase OS=Fusarium sporotrichioides GN=TRI11 PE=3 SV=1	GO:0020037 ;GO:0016705 ;GO:0004497 ;GO:0005506 ;GO:0055114	CYP	CYP
Zoff225561	B	636	0	1	0	0	0	0	0	0	0	22	0	0	0	0.06	0	0	0	0	0	0	0	1.11	0	0	0.02	0	0	0.37	gi|302916541|ref|XP_003052081.1|	predicted protein [Nectria haematococca mpVI 77-13-4]	fgr:FG06068.1	hypothetical protein	Hs6005737	[QI] KOG0157 Cytochrome P450 CYP4/CYP19/CYP26 subfamilies	sp|O13317|TRI11_FUSSP	Isotrichodermin C-15 hydroxylase OS=Fusarium sporotrichioides GN=TRI11 PE=3 SV=1	GO:0020037 ;GO:0016705 ;GO:0004497 ;GO:0005506 ;GO:0055114	CYP	CYP
Zoff225644	C	645	0	0	0	0	0	0	0	0	0	0	0	2.66	0	0	0	0	0	0	0	0	0	0	0	0.13	0	0	0	0.0433333	gi|641762475|ref|XP_008166701.1|	PREDICTED: cytochrome P450 4V2-like [Chrysemys picta bellii]	tca:659672	Cyp4q9; cytochrome P450 monooxigenase CYP4Q9	CE15919	[QI] KOG0157 Cytochrome P450 CYP4/CYP19/CYP26 subfamilies	sp|Q6ZWL3|CP4V2_HUMAN	Cytochrome P450 4V2 OS=Homo sapiens GN=CYP4V2 PE=1 SV=2	--	CYP4V	CYP4
Zoff225645	C	645	0	0	0	0	0	0	0	0	0	0	0	5.34	0	0	0	0	0	0	0	0	0	0	0	0.27	0	0	0	0.09	gi|641762475|ref|XP_008166701.1|	PREDICTED: cytochrome P450 4V2-like [Chrysemys picta bellii]	tca:659672	Cyp4q9; cytochrome P450 monooxigenase CYP4Q9	CE15919	[QI] KOG0157 Cytochrome P450 CYP4/CYP19/CYP26 subfamilies	sp|Q6ZWL3|CP4V2_HUMAN	Cytochrome P450 4V2 OS=Homo sapiens GN=CYP4V2 PE=1 SV=2	--	CYP4V	CYP4
Zoff225646	C	1848	6	1	1	0	0	0	0	0	0	1	0	82	0.3	0.06	0.05	0	0	0	0	0	0	0.05	0	4.13	0.136667	0	0	1.39333	gi|677702913|ref|XP_009081963.1|	PREDICTED: cytochrome P450 4V2 [Acanthisitta chloris]	mgp:100549160	cytochrome P450 4V3-like	CE24183	[QI] KOG0157 Cytochrome P450 CYP4/CYP19/CYP26 subfamilies	sp|Q9DBW0|CP4V2_MOUSE	Cytochrome P450 4V2 OS=Mus musculus GN=Cyp4v2 PE=1 SV=1	GO:0016491 ;GO:0005488 ;GO:0016491 ;GO:0005488	CYP4V	CYP4
Zoff225647	C	756	0	0	0	0	0	0	0	0	0	0	0	5	0	0	0	0	0	0	0	0	0	0	0	0.25	0	0	0	0.0833333	gi|524994805|ref|XP_005045213.1|	PREDICTED: cytochrome P450 4V2-like [Ficedula albicollis]	mgp:100549160	cytochrome P450 4V3-like	CE15919	[QI] KOG0157 Cytochrome P450 CYP4/CYP19/CYP26 subfamilies	sp|Q9DBW0|CP4V2_MOUSE	Cytochrome P450 4V2 OS=Mus musculus GN=Cyp4v2 PE=1 SV=1	--	CYP4V	CYP4
Zoff225669	A	1987	303	247	194	27	490	34	328	610	378	204	289	372	14.91	14.19	9.63	1.37	25.34	1.68	16.14	30.56	18.66	10.32	14.31	18.73	12.91	9.46333	21.7867	14.4533	gi|695012080|ref|XP_009392783.1|	PREDICTED: ent-kaurenoic acid oxidase 1-like [Musa acuminata subsp. malaccensis]	osa:4339885	Os06g0110000; K04123 ent-kaurenoic acid hydroxylase [EC:1.14.13.79]	At1g05160	[QI] KOG0157 Cytochrome P450 CYP4/CYP19/CYP26 subfamilies	sp|Q9AXH9|KAO1_HORVU	Ent-kaurenoic acid oxidase 1 OS=Hordeum vulgare GN=KAO1 PE=1 SV=1	GO:0016023 ;GO:0004497 ;GO:0005506 ;GO:0009685 ;GO:0020037 ;GO:0016705 ;GO:0055114 ;GO:0016021 ;GO:0055114 ;GO:0016705 ;GO:0004497 ;GO:0016023 ;GO:0020037 ;GO:0009686 ;GO:0005789 ;GO:0005506 ;GO:0016021 ;GO:0055114 ;GO:0016705 ;GO:0004497 ;GO:0016023 ;GO:0020037 ;GO:0009686 ;GO:0005789 ;GO:0005506 ;GO:0016023 ;GO:0004497 ;GO:0005506 ;GO:0009685 ;GO:0020037 ;GO:0016705 ;GO:0055114	CYP88A	CYP88
Zoff225741	D	2491	1429	1330	1195	4827	2993	3458	4777	3029	5856	3983	3540	3446	70.33	76.39	59.29	244.86	154.78	170.96	235.08	151.77	289.06	201.42	175.33	173.54	68.67	190.2	225.303	183.43	gi|695079834|ref|XP_009387345.1|	PREDICTED: cytochrome P450 71A1-like [Musa acuminata subsp. malaccensis]	vvi:100265573	hypothetical protein LOC100265573	At3g26310	[Q] KOG0156 Cytochrome P450 CYP2 subfamily	sp|O81970|C71A9_SOYBN	Cytochrome P450 71A9 OS=Glycine max GN=CYP71A9 PE=2 SV=1	GO:0020037 ;GO:0016705 ;GO:0004497 ;GO:0005506 ;GO:0055114	CYP71A	CYP71
Zoff225809	D	1808	257	205	257	335	441	374	323	345	290	352	372	278	12.65	11.78	12.75	16.99	22.81	18.49	15.9	17.29	14.31	17.8	18.42	14	12.3933	19.43	15.8333	16.74	gi|672201200|ref|XP_008778075.1|	PREDICTED: LOW QUALITY PROTEIN: geraniol 8-hydroxylase-like [Phoenix dactylifera]	sbi:SORBI_07g024990	hypothetical protein	At4g12320	[Q] KOG0156 Cytochrome P450 CYP2 subfamily	sp|Q9SBQ9|F3PH_PETHY	Flavonoid 3'-monooxygenase OS=Petunia hybrida GN=CYP75B2 PE=2 SV=1	GO:0020037 ;GO:0016705 ;GO:0004497 ;GO:0005506 ;GO:0055114 ;GO:0020037 ;GO:0016705 ;GO:0004497 ;GO:0005506 ;GO:0055114 ;GO:0020037 ;GO:0016705 ;GO:0004497 ;GO:0005506 ;GO:0055114 ;GO:0020037 ;GO:0016705 ;GO:0004497 ;GO:0005506 ;GO:0055114 ;GO:0020037 ;GO:0016705 ;GO:0004497 ;GO:0005506 ;GO:0055114 ;GO:0020037 ;GO:0016705 ;GO:0004497 ;GO:0005506 ;GO:0055114 ;GO:0020037 ;GO:0016705 ;GO:0004497 ;GO:…	CYP75B	CYP75
Zoff226187	A	1662	0	2	10	5	9	1	0	4	0	4	0	0	0	0.11	0.5	0.25	0.47	0.05	0	0.2	0	0.2	0	0	0.203333	0.256667	0.0666667	0.0666667	gi|302418176|ref|XP_003006919.1|	benzoate 4-monooxygenase cytochrome P450 [Verticillium alfalfae VaMs.102]	fgr:FG03086.1	hypothetical protein	Hs13435386	[Q] KOG0158 Cytochrome P450 CYP3/CYP5/CYP6/CYP9 subfamilies	sp|Q4WAW5|FTMC_ASPFU	Tryprostatin B 6-hydroxylase OS=Neosartorya fumigata (strain ATCC MYA-4609 / Af293 / CBS 101355 / FGSC A1100) GN=ftmP450-1 PE=3 SV=2	GO:0020037 ;GO:0016705 ;GO:0004497 ;GO:0005506 ;GO:0055114	CYP	CYP
Zoff226188	A	1928	2	8	15	8	11	0	0	4	3	3	0	0	0.1	0.46	0.74	0.41	0.57	0	0	0.2	0.15	0.15	0	0	0.433333	0.326667	0.116667	0.05	gi|630019730|ref|XP_007833515.1|	hypothetical protein PFICI_06743 [Pestalotiopsis fici W106-1]	afv:AFLA_004370	cytochrome P450 oxidoreductase, putative	Hs4503231	[Q] KOG0158 Cytochrome P450 CYP3/CYP5/CYP6/CYP9 subfamilies	sp|Q4WAW5|FTMC_ASPFU	Tryprostatin B 6-hydroxylase OS=Neosartorya fumigata (strain ATCC MYA-4609 / Af293 / CBS 101355 / FGSC A1100) GN=ftmP450-1 PE=3 SV=2	GO:0046872 ;GO:0008152 ;GO:0016491 ;GO:0046872 ;GO:0008152 ;GO:0016491	CYP	CYP
Zoff227707	A	1831	5	13	53	0	0	0	10	8	17	4	0	12	0.25	0.75	2.63	0	0	0	0.49	0.4	0.84	0.2	0	0.6	1.21	0	0.576667	0.266667	gi|695014288|ref|XP_009393959.1|	PREDICTED: cytokinin hydroxylase-like [Musa acuminata subsp. malaccensis]	pop:POPTR_575832	CYP715A3; cytochrome P450	At5g52400	[QI] KOG0157 Cytochrome P450 CYP4/CYP19/CYP26 subfamilies	sp|Q9LUC5|C7A15_ARATH	Cytochrome P450 72A15 OS=Arabidopsis thaliana GN=CYP72A15 PE=2 SV=1	GO:0046872 ;GO:0016491 ;GO:0016023 ;GO:0046872 ;GO:0016491 ;GO:0016023 ;GO:0046872 ;GO:0016491 ;GO:0016023 ;GO:0046872 ;GO:0016491 ;GO:0016023	CYP72A	CYP72
Zoff228214	A	2697	16	13	263	1	1	1	5	1	3	0	0	49	0.79	0.75	13.05	0.05	0.05	0.05	0.25	0.05	0.15	0	0	2.47	4.86333	0.05	0.15	0.823333	gi|628324608|ref|XP_007743138.1|	hypothetical protein A1O5_04341 [Cladophialophora psammophila CBS 110553]	nfi:NFIA_094190	Cytochrome P450 oxidoreductase, putative	At4g12300	[Q] KOG0156 Cytochrome P450 CYP2 subfamily	sp|O13345|ORDA_ASPPA	O-methylsterigmatocystin oxidoreductase OS=Aspergillus parasiticus GN=ordA PE=1 SV=1	GO:0046872 ;GO:0016491	CYP	CYP
Zoff228248	C	2702	373	238	251	1386	1087	1074	367	424	415	478	992	903	18.36	13.67	12.45	70.31	56.21	53.1	18.06	21.24	20.49	24.17	49.13	45.47	14.8267	59.8733	19.93	39.59	gi|695009842|ref|XP_009391571.1|	PREDICTED: cytochrome P450 90A1 isoform X1 [Musa acuminata subsp. malaccensis]	osa:4351461	Os12g0139300; K09588 cytochrome P450, family 90, subfamily A, polypeptide 1 [EC:1.14.-.-]	At5g05690	[QI] KOG0157 Cytochrome P450 CYP4/CYP19/CYP26 subfamilies	sp|Q42569|C90A1_ARATH	Cytochrome P450 90A1 OS=Arabidopsis thaliana GN=CYP90A1 PE=2 SV=1	GO:0009908 ;GO:0032989 ;GO:0016020 ;GO:0016023 ;GO:0060560 ;GO:0045229 ;GO:0020037 ;GO:1901576 ;GO:0009411 ;GO:0048513 ;GO:0016705 ;GO:0004497 ;GO:0010817 ;GO:0005506 ;GO:0044711 ;GO:0044238 ;GO:0030154 ;GO:0055114 ;GO:0016049 ;GO:0048646 ;GO:0009908 ;GO:0032989 ;GO:0016020 ;GO:0016023 ;GO:0060560 ;GO:0045229 ;GO:0020037 ;GO:1901576 ;GO:0009411 ;GO:0048513 ;GO:0016705 ;GO:0004497 ;GO:0010817 ;GO:…	CYP90A	CYP90
Zoff229511	A	3987	322	274	441	771	681	521	671	634	792	804	824	575	15.85	15.74	21.88	39.11	35.22	25.76	33.02	31.77	39.09	40.66	40.81	28.96	17.8233	33.3633	34.6267	36.81	gi|695071858|ref|XP_009383021.1|	PREDICTED: cytochrome P450 734A6-like [Musa acuminata subsp. malaccensis]	osa:4344024	Os07g0635500	At2g46950	[QI] KOG0157 Cytochrome P450 CYP4/CYP19/CYP26 subfamilies	sp|B9X287|C7346_ORYSJ	Cytochrome P450 734A6 OS=Oryza sativa subsp. japonica GN=CYP734A6 PE=2 SV=1	GO:0046872 ;GO:0016491 ;GO:0016023	CYP734A	CYP734
Zoff229624	C	502	24	24	26	5	14	7	11	15	6	8	7	14	1.18	1.38	1.29	0.25	0.72	0.35	0.54	0.75	0.3	0.4	0.35	0.71	1.28333	0.44	0.53	0.486667	gi|695077681|ref|XP_009386194.1|	PREDICTED: cytochrome P450 78A6-like [Musa acuminata subsp. malaccensis]	pop:POPTR_700313	CYP78A25; cytochrome P450	At2g46660	[Q] KOG0156 Cytochrome P450 CYP2 subfamily	sp|Q9ZNR0|C78A6_ARATH	Cytochrome P450 78A6 OS=Arabidopsis thaliana GN=CYP78A6 PE=2 SV=1	GO:0046872 ;GO:0016491 ;GO:0046872 ;GO:0016491	CYP78A	CYP78
Zoff229625	C	2314	591	666	377	1999	972	1386	1627	790	1576	710	1368	584	29.09	38.25	18.71	101.41	50.26	68.52	80.07	39.58	77.79	35.9	67.75	29.41	28.6833	73.3967	65.8133	44.3533	gi|695071300|ref|XP_009382716.1|	PREDICTED: cytochrome P450 78A9-like [Musa acuminata subsp. malaccensis]	osa:4346234	Os08g0547300	At2g46660	[Q] KOG0156 Cytochrome P450 CYP2 subfamily	sp|Q9ZNR0|C78A6_ARATH	Cytochrome P450 78A6 OS=Arabidopsis thaliana GN=CYP78A6 PE=2 SV=1	GO:0046872 ;GO:0016491	CYP78A	CYP78
Zoff230438	B	1404	173.88	134.93	106.91	4005.82	506.82	2482.06	1623.3	298.69	977.04	4028.57	113.63	573.98	8.56	7.75	5.3	203.21	26.21	122.71	79.88	14.97	48.23	203.72	5.63	28.91	7.20333	117.377	47.6933	79.42	gi|403399730|sp|E3W9C4.1|C71A1_ZINZE	RecName: Full=Alpha-humulene 10-hydroxylase [Zingiber zerumbet]	vvi:100246293	hypothetical protein LOC100246293	At3g26300	[Q] KOG0156 Cytochrome P450 CYP2 subfamily	sp|E3W9C4|C71A1_ZINZE	Alpha-humulene 10-hydroxylase OS=Zingiber zerumbet GN=CYP71BA1 PE=1 SV=1	GO:0046872 ;GO:0016491 ;GO:0016491 ;GO:0005488 ;GO:0046872 ;GO:0016491 ;GO:0016491 ;GO:0005488 ;GO:0046872 ;GO:0016491 ;GO:0020037 ;GO:0016705 ;GO:0004497 ;GO:0005506 ;GO:0055114 ;GO:0046872 ;GO:0016491 ;GO:0016023 ;GO:0016020 ;GO:0020037 ;GO:0016705 ;GO:0004497 ;GO:0005506 ;GO:0055114	CYP71B	CYP71
Zoff230849	A	3174	59	57	41	85	84	72	65	66	44	76	109	47	2.9	3.27	2.03	4.31	4.34	3.56	3.2	3.31	2.17	3.84	5.4	2.37	2.73333	4.07	2.89333	3.87	gi|672176627|ref|XP_008808383.1|	PREDICTED: phenylalanine N-monooxygenase-like [Phoenix dactylifera]	vvi:100265709	hypothetical protein LOC100265709	At5g05260	[Q] KOG0156 Cytochrome P450 CYP2 subfamily	sp|Q9FLC8|C79A2_ARATH	Phenylalanine N-monooxygenase OS=Arabidopsis thaliana GN=CYP79A2 PE=1 SV=1	GO:0046872 ;GO:0016491	CYP79A	CYP79
Zoff231158	A	2477	114	82	204	3215	1804	2949	454	59	210	465	565	639	5.61	4.71	10.12	163.09	93.29	145.79	22.34	2.96	10.37	23.51	27.98	32.18	6.81333	134.057	11.89	27.89	gi|695030700|ref|XP_009402829.1|	PREDICTED: cytochrome P450 85A1-like [Musa acuminata subsp. malaccensis]	osa:4333399	Os03g0602300	At5g38970	[QI] KOG0157 Cytochrome P450 CYP4/CYP19/CYP26 subfamilies	sp|Q8GSQ1|C85A1_ORYSJ	Cytochrome P450 85A1 OS=Oryza sativa subsp. japonica GN=CYP85A1 PE=1 SV=1	GO:0016132 ;GO:0016021 ;GO:0022900 ;GO:0001578 ;GO:0010268 ;GO:0009647 ;GO:0016705 ;GO:0004497 ;GO:0020037 ;GO:0005506 ;GO:0020037 ;GO:0016705 ;GO:0004497 ;GO:0005506 ;GO:0055114 ;GO:0016132 ;GO:0016021 ;GO:0022900 ;GO:0001578 ;GO:0010268 ;GO:0009647 ;GO:0016705 ;GO:0004497 ;GO:0020037 ;GO:0005506 ;GO:0016132 ;GO:0016021 ;GO:0022900 ;GO:0001578 ;GO:0010268 ;GO:0009647 ;GO:0016705 ;GO:0004497 ;GO:…	CYP85A	CYP85
Zoff231190	C	2284	282	204	368	482	561	546	266	208	312	472	363	310	13.88	11.72	18.26	24.45	29.01	26.99	13.09	10.42	15.4	23.87	17.98	15.61	14.62	26.8167	12.97	19.1533	gi|695054613|ref|XP_009415441.1|	PREDICTED: cytochrome P450 93A3-like [Musa acuminata subsp. malaccensis]	pop:POPTR_89386	CYP93A4; cytochrome P450	At5g06900	[Q] KOG0156 Cytochrome P450 CYP2 subfamily	sp|Q42798|C93A1_SOYBN	3,9-dihydroxypterocarpan 6A-monooxygenase OS=Glycine max GN=CYP93A1 PE=1 SV=1	GO:0046872 ;GO:0016491 ;GO:0046872 ;GO:0016491 ;GO:0046872 ;GO:0016491	CYP93A	CYP93
Zoff231191	C	815	20	10	19	8	9	2	18	6	8	11	42	17	0.98	0.57	0.94	0.41	0.47	0.1	0.89	0.3	0.39	0.56	2.08	0.86	0.83	0.326667	0.526667	1.16667	gi|695054613|ref|XP_009415441.1|	PREDICTED: cytochrome P450 93A3-like [Musa acuminata subsp. malaccensis]	pop:POPTR_89386	CYP93A4; cytochrome P450	At5g06900	[Q] KOG0156 Cytochrome P450 CYP2 subfamily	sp|Q42798|C93A1_SOYBN	3,9-dihydroxypterocarpan 6A-monooxygenase OS=Glycine max GN=CYP93A1 PE=1 SV=1	GO:0016491 ;GO:0005488	CYP93A	CYP93
Zoff232161	B	2089	365	481	390	34	21	80	272	709	88	229	403	209	17.96	27.63	19.35	1.72	1.09	3.96	13.39	35.52	4.34	11.58	19.96	10.53	21.6467	2.25667	17.75	14.0233	gi|695061280|ref|XP_009419067.1|	PREDICTED: cytochrome P450 78A5-like [Musa acuminata subsp. malaccensis]	vvi:100253660	hypothetical protein LOC100253660	At1g13710	[Q] KOG0156 Cytochrome P450 CYP2 subfamily	sp|Q9LMX7|C78A5_ARATH	Cytochrome P450 78A5 OS=Arabidopsis thaliana GN=CYP78A5 PE=2 SV=1	GO:0020037 ;GO:0016705 ;GO:0004497 ;GO:0005506 ;GO:0009055 ;GO:0055114	CYP78A	CYP78
Zoff232162	B	1392	47	14	68	399	225	119	43	143	26	91	424	146	2.31	0.8	3.37	20.24	11.64	5.88	2.12	7.16	1.28	4.6	21	7.35	2.16	12.5867	3.52	10.9833	gi|695072915|ref|XP_009383603.1|	PREDICTED: cytochrome P450 78A11 [Musa acuminata subsp. malaccensis]	sbi:SORBI_01g022690	hypothetical protein	At5g09970	[Q] KOG0156 Cytochrome P450 CYP2 subfamily	sp|P48420|C78A1_MAIZE	Cytochrome P450 78A1 OS=Zea mays GN=CYP78A1 PE=2 SV=1	GO:0004497 ;GO:0005506 ;GO:0020037 ;GO:0016705 ;GO:0048513 ;GO:0016020 ;GO:0040008 ;GO:0055114	CYP78A	CYP78
Zoff232163	D	535	19	8	17	117	50	23	10	30	3	25	83	43	0.94	0.46	0.84	5.94	2.59	1.14	0.49	1.5	0.15	1.26	4.11	2.17	0.746667	3.22333	0.713333	2.51333	gi|695072915|ref|XP_009383603.1|	PREDICTED: cytochrome P450 78A11 [Musa acuminata subsp. malaccensis]	pop:POPTR_347060	CYP78A20; cytochrome P450	At5g09970	[Q] KOG0156 Cytochrome P450 CYP2 subfamily	sp|P48420|C78A1_MAIZE	Cytochrome P450 78A1 OS=Zea mays GN=CYP78A1 PE=2 SV=1	GO:0010075 ;GO:0009055 ;GO:0004497 ;GO:0005506 ;GO:0020037 ;GO:0016705 ;GO:0016021 ;GO:0048445 ;GO:0055114	CYP78A	CYP78
Zoff232204	A	3737	11	2	43	1	2	1	8	14	2	6	2	133	0.54	0.11	2.13	0.05	0.1	0.05	0.39	0.7	0.1	0.3	0.1	6.7	0.926667	0.0666667	0.396667	2.36667	gi|656917562|gb|KEF63140.1|	hypothetical protein A1O9_01116 [Exophiala aquamarina CBS 119918]	fgr:FG01972.1	C505_FUSOX Bifunctional P-450:NADPH-P450 reductase (Fatty acid omega-hydroxylase) (P450foxy); K14338 cytochrome P450 / NADPH-cytochrome P450 reductase [EC:1.14.14.1 1.6.2.4]	Hs22049499	[C] KOG1158 NADP/FAD dependent oxidoreductase	sp|Q9Y8G7|C505_FUSOX	Bifunctional P-450:NADPH-P450 reductase OS=Fusarium oxysporum GN=CYP505 PE=1 SV=1	GO:0046872 ;GO:0016705 ;GO:0097159 ;GO:1901363	CYP505	CYP505
Zoff236083	B	2793	117	84	183	118	90	115	72	125	61	99	121	112	5.76	4.82	9.08	5.99	4.65	5.69	3.54	6.26	3.01	5.01	5.99	5.64	6.55333	5.44333	4.27	5.54667	gi|695011886|ref|XP_009392677.1|	PREDICTED: cytochrome P450 77A2-like [Musa acuminata subsp. malaccensis]	zma:100193602	hypothetical protein LOC100193602	At5g04660	[Q] KOG0156 Cytochrome P450 CYP2 subfamily	sp|O48928|C77A3_SOYBN	Cytochrome P450 77A3 OS=Glycine max GN=CYP77A3 PE=2 SV=1	GO:0016023 ;GO:0004497 ;GO:0005506 ;GO:0020037 ;GO:0016705 ;GO:0055114 ;GO:0010075 ;GO:0042545 ;GO:0009664 ;GO:0031225 ;GO:0048653	CYP77A	CYP77
Zoff237411	A	2787	1299	1155	2107	1256	1034	1204	1212	1202	1253	3391	1053	1171	63.93	66.34	104.54	63.71	53.47	59.52	59.64	60.23	61.85	171.48	52.15	58.97	78.27	58.9	60.5733	94.2	gi|695066409|ref|XP_009380096.1|	PREDICTED: isoflavone 2'-hydroxylase-like [Musa acuminata subsp. malaccensis]	vvi:100267741	hypothetical protein LOC100267741	At5g10600	[Q] KOG0156 Cytochrome P450 CYP2 subfamily	sp|P93147|C81E1_GLYEC	Isoflavone 2'-hydroxylase OS=Glycyrrhiza echinata GN=CYP81E1 PE=1 SV=2	GO:0016491 ;GO:0008152	CYP81E	CYP81
Zoff239330	D	2036	1787	1618	2213	1796	1661	1219	1366	1135	1424	2675	1742	1613	87.95	92.94	109.8	91.11	85.89	60.26	67.22	56.87	70.29	135.27	86.28	81.23	96.8967	79.0867	64.7933	100.927	gi|695077280|ref|XP_009385971.1|	PREDICTED: cytochrome P450 89A2-like [Musa acuminata subsp. malaccensis]	vvi:100240884	hypothetical protein LOC100240884	At1g64940	[Q] KOG0156 Cytochrome P450 CYP2 subfamily	sp|Q42602|C89A2_ARATH	Cytochrome P450 89A2 OS=Arabidopsis thaliana GN=CYP89A2 PE=2 SV=2	GO:0046872 ;GO:0016491	CYP89A	CYP89
Zoff243390	B	2054	278	291	1187	143	183	202	382	920	438	1348	93	214	13.68	16.71	58.9	7.25	9.46	9.99	18.8	46.1	21.62	68.17	4.61	10.78	29.7633	8.9	28.84	27.8533	gi|695039976|ref|XP_009407544.1|	PREDICTED: cytochrome P450 86A1 [Musa acuminata subsp. malaccensis]	osa:4324825	Os01g0854800	At5g58860	[QI] KOG0157 Cytochrome P450 CYP4/CYP19/CYP26 subfamilies	sp|P48422|C86A1_ARATH	Cytochrome P450 86A1 OS=Arabidopsis thaliana GN=CYP86A1 PE=1 SV=2	GO:0016021 ;GO:0006631 ;GO:0055114 ;GO:0010345 ;GO:0000041 ;GO:0009055 ;GO:0018685 ;GO:0020037 ;GO:0005773 ;GO:0005506	CYP86A	CYP86
Zoff243391	B	2120	196	235	978	82	102	153	394	1020	481	4680	72	215	9.65	13.5	48.53	4.16	5.27	7.56	19.39	51.11	23.74	236.66	3.57	10.83	23.8933	5.66333	31.4133	83.6867	gi|694994949|ref|XP_009407697.1|	PREDICTED: cytochrome P450 86B1-like isoform X2 [Musa acuminata subsp. malaccensis]	osa:4348947	Os10g0486100	At5g23190	[QI] KOG0157 Cytochrome P450 CYP4/CYP19/CYP26 subfamilies	sp|Q9FMY1|C86B1_ARATH	Cytochrome P450 86B1 OS=Arabidopsis thaliana GN=CYP86B1 PE=2 SV=1	GO:0020037 ;GO:0016705 ;GO:0004497 ;GO:0005506 ;GO:0055114	CYP86B	CYP86
Zoff243516	A	2968	14	7.28	518.58	1	6	2	8	12	0	3	1	70.68	0.69	0.42	25.73	0.05	0.31	0.1	0.39	0.6	0	0.15	0.05	3.56	8.94667	0.153333	0.33	1.25333	gi|628306670|ref|XP_007740501.1|	hypothetical protein A1O5_01695 [Cladophialophora psammophila CBS 110553]	nfi:NFIA_094190	Cytochrome P450 oxidoreductase, putative	At4g12300	[Q] KOG0156 Cytochrome P450 CYP2 subfamily	sp|Q4WAW8|FTME_ASPFU	Fumitremorgin C synthase OS=Neosartorya fumigata (strain ATCC MYA-4609 / Af293 / CBS 101355 / FGSC A1100) GN=ftmP450-2 PE=3 SV=1	GO:0020037 ;GO:0016705 ;GO:0004497 ;GO:0005506 ;GO:0055114 ;GO:0020037 ;GO:0016705 ;GO:0004497 ;GO:0005506 ;GO:0055114 ;GO:0020037 ;GO:0016705 ;GO:0004497 ;GO:0005506 ;GO:0055114 ;GO:0020037 ;GO:0016705 ;GO:0004497 ;GO:0005506 ;GO:0055114 ;GO:0020037 ;GO:0016705 ;GO:0004497 ;GO:0005506 ;GO:0055114	CYP2	CYP2
Zoff243745	A	1467	45	28	42	60	44	48	47	50	45	39	67	37	2.21	1.61	2.08	3.04	2.28	2.37	2.31	2.51	2.22	1.97	3.32	1.86	1.96667	2.56333	2.34667	2.38333	gi|672130439|ref|XP_008788752.1|	PREDICTED: ent-kaurenoic acid oxidase 1-like, partial [Phoenix dactylifera]	sbi:SORBI_10g000920	hypothetical protein; K04123 ent-kaurenoic acid hydroxylase [EC:1.14.13.79]	At1g05160	[QI] KOG0157 Cytochrome P450 CYP4/CYP19/CYP26 subfamilies	sp|Q9AXH9|KAO1_HORVU	Ent-kaurenoic acid oxidase 1 OS=Hordeum vulgare GN=KAO1 PE=1 SV=1	GO:0016021 ;GO:0055114 ;GO:0016705 ;GO:0004497 ;GO:0020037 ;GO:0009686 ;GO:0005789 ;GO:0005506 ;GO:0016021 ;GO:0055114 ;GO:0016705 ;GO:0004497 ;GO:0020037 ;GO:0009686 ;GO:0005789 ;GO:0005506 ;GO:0016021 ;GO:0055114 ;GO:0016705 ;GO:0004497 ;GO:0020037 ;GO:0009686 ;GO:0005789 ;GO:0005506	CYP	CYP
Zoff245486	D	2894	964	683	863	1259	1296	1045	872	792	862	1145	1178	940	47.45	39.23	42.82	63.87	67.02	51.66	42.91	39.68	42.55	57.9	58.34	47.34	43.1667	60.85	41.7133	54.5267	gi|695010823|ref|XP_009392100.1|	PREDICTED: cytochrome P450 71A1-like [Musa acuminata subsp. malaccensis]	pop:POPTR_776174	hypothetical protein	At4g13310	[Q] KOG0156 Cytochrome P450 CYP2 subfamily	sp|P24465|C71A1_PERAE	Cytochrome P450 71A1 OS=Persea americana GN=CYP71A1 PE=1 SV=2	GO:0016491 ;GO:0005488 ;GO:0016491 ;GO:0005488	CYP71A	CYP71
Zoff245487	C	1860	566	459	1371	57	244	107	516	619	532	1798	120	149	27.86	26.36	68.03	2.89	12.62	5.29	25.39	31.01	26.26	90.92	5.94	7.5	40.75	6.93333	27.5533	34.7867	gi|695074657|ref|XP_009384541.1|	PREDICTED: cytochrome P450 84A1-like [Musa acuminata subsp. malaccensis]	pop:POPTR_836596	CAld5H/F5H1, CYP84A10; coniferylaldehyde 5- hydroxylase; K09755 ferulate-5-hydroxylase [EC:1.14.-.-]	At4g36220	[Q] KOG0156 Cytochrome P450 CYP2 subfamily	sp|Q42600|C84A1_ARATH	Cytochrome P450 84A1 OS=Arabidopsis thaliana GN=CYP84A1 PE=1 SV=1	GO:0020037 ;GO:0016705 ;GO:0004497 ;GO:0005506 ;GO:0055114	CYP84A	CYP84
Zoff247548	C	3929	170	39	662	2	5	8	31	26	17	13	7	152	8.37	2.24	32.85	0.1	0.26	0.4	1.53	1.3	0.84	0.66	0.35	7.65	14.4867	0.253333	1.22333	2.88667	gi|656907145|gb|KEF52884.1|	NADPH-cytochrome P450 reductase [Exophiala aquamarina CBS 119918]	afm:AFUA_6G10990	NADPH cytochrome P450 reductase (CprA) (EC:1.6.2.4); K00327 NADPH-ferrihemoprotein reductase [EC:1.6.2.4]	SPBC365.17	[C] KOG1158 NADP/FAD dependent oxidoreductase	sp|Q4WM67|NCPR_ASPFU	NADPH--cytochrome P450 reductase OS=Neosartorya fumigata (strain ATCC MYA-4609 / Af293 / CBS 101355 / FGSC A1100) GN=cprA PE=1 SV=1	GO:0016021 ;GO:0055114 ;GO:0003958 ;GO:0006790 ;GO:0006091 ;GO:0050311 ;GO:0005789 ;GO:0010181 ;GO:0005506 ;GO:0005886 ;GO:0016126	CYP	CYP
Zoff247641	B	1026	8	3	13	1	12	7	14	2	7	6	23	22	0.39	0.17	0.65	0.05	0.62	0.35	0.69	0.1	0.35	0.3	1.14	1.11	0.403333	0.34	0.38	0.85	gi|695061280|ref|XP_009419067.1|	PREDICTED: cytochrome P450 78A5-like [Musa acuminata subsp. malaccensis]	vvi:100249034	hypothetical protein LOC100249034	At1g13710	[Q] KOG0156 Cytochrome P450 CYP2 subfamily	sp|Q9LMX7|C78A5_ARATH	Cytochrome P450 78A5 OS=Arabidopsis thaliana GN=CYP78A5 PE=2 SV=1	GO:0020037 ;GO:0016705 ;GO:0004497 ;GO:0005506 ;GO:0009055 ;GO:0055114 ;GO:0020037 ;GO:0016705 ;GO:0004497 ;GO:0005506 ;GO:0009055 ;GO:0055114 ;GO:0051239 ;GO:0048638 ;GO:0055114 ;GO:0048518 ;GO:0048367 ;GO:0035265 ;GO:0016705 ;GO:0009055 ;GO:0004497 ;GO:0048513 ;GO:0020037 ;GO:0005506 ;GO:0016020	CYP78A	CYP78
Zoff248505	B	1583	602	548	770	1260	470	1087	141	353	206	447	290	911	29.63	31.48	38.21	63.92	24.3	53.74	6.94	17.69	10.17	22.6	14.36	45.88	33.1067	47.32	11.6	27.6133	gi|695027507|ref|XP_009401100.1|	PREDICTED: cytochrome P450 94C1-like [Musa acuminata subsp. malaccensis]	vvi:100261934	hypothetical protein	At2g27690	[QI] KOG0157 Cytochrome P450 CYP4/CYP19/CYP26 subfamilies	sp|Q9ZUX1|C94C1_ARATH	Cytochrome P450 94C1 OS=Arabidopsis thaliana GN=CYP94C1 PE=2 SV=1	GO:0071229 ;GO:0009753 ;GO:0044710 ;GO:0009628 ;GO:0046872 ;GO:0016705 ;GO:1901701 ;GO:0004497 ;GO:0009755 ;GO:0006950 ;GO:0046872 ;GO:0016491	CYP94C	CYP94
Zoff248506	B	1856	396	714	1929	108	95	81	142	518	228	226	446	1041	19.49	41.01	95.71	5.48	4.91	4	6.99	25.95	11.25	11.43	22.09	52.42	52.07	4.79667	14.73	28.6467	gi|695027507|ref|XP_009401100.1|	PREDICTED: cytochrome P450 94C1-like [Musa acuminata subsp. malaccensis]	vvi:100261934	hypothetical protein	At2g27690	[QI] KOG0157 Cytochrome P450 CYP4/CYP19/CYP26 subfamilies	sp|Q9ZUX1|C94C1_ARATH	Cytochrome P450 94C1 OS=Arabidopsis thaliana GN=CYP94C1 PE=2 SV=1	GO:0071229 ;GO:0009753 ;GO:0044710 ;GO:0009628 ;GO:0046872 ;GO:0016705 ;GO:1901701 ;GO:0004497 ;GO:0009755 ;GO:0006950	CYP94C	CYP94
Zoff248539	C	2072	11	6	2	0	0	1	2	1	2	0	0	54	0.54	0.34	0.1	0	0	0.05	0.1	0.05	0.1	0	0	2.72	0.326667	0.0166667	0.0833333	0.906667	gi|38679387|gb|AAR26515.1|	antennal oxidoreductase [Mamestra brassicae]	phu:Phum_PHUM101680	NADPH--cytochrome P450, putative (EC:1.6.2.4); K00327 NADPH-ferrihemoprotein reductase [EC:1.6.2.4]	7297099	[C] KOG1158 NADP/FAD dependent oxidoreductase	sp|Q07994|NCPR_MUSDO	NADPH--cytochrome P450 reductase OS=Musca domestica PE=2 SV=1	--	CYP	CYP
Zoff251429	D	3259	388	273	287	902	665	730	820	477	866	821	373	411	19.1	15.68	14.24	45.76	34.39	36.09	40.35	23.9	42.75	41.52	18.47	20.7	16.34	38.7467	35.6667	26.8967	gi|695040551|ref|XP_009407856.1|	PREDICTED: cytochrome P450 89A2-like [Musa acuminata subsp. malaccensis]	pop:POPTR_558572	CYP89A18; cytochrome P450	At1g64940	[Q] KOG0156 Cytochrome P450 CYP2 subfamily	sp|Q42602|C89A2_ARATH	Cytochrome P450 89A2 OS=Arabidopsis thaliana GN=CYP89A2 PE=2 SV=2	GO:0046872 ;GO:0022900 ;GO:0004497 ;GO:0046872 ;GO:0016491 ;GO:0046872 ;GO:0016491 ;GO:0046872 ;GO:0016491 ;GO:0046872 ;GO:0016491	CYP89A	CYP89
Zoff251591	A	1180	263	174	193	234	222	432	68	122	55	238	218	418	12.94	9.99	9.58	11.87	11.48	21.36	3.35	6.11	2.71	12.04	10.8	21.05	10.8367	14.9033	4.05667	14.63	gi|695040430|ref|XP_009407793.1|	PREDICTED: abscisic acid 8'-hydroxylase 1-like [Musa acuminata subsp. malaccensis]	rcu:RCOM_0814150	cytochrome P450, putative (EC:1.14.13.79); K09843 (+)-abscisic acid 8'-hydroxylase [EC:1.14.13.93]	At5g45340	[QI] KOG0157 Cytochrome P450 CYP4/CYP19/CYP26 subfamilies	sp|Q05JG2|ABAH1_ORYSJ	Abscisic acid 8'-hydroxylase 1 OS=Oryza sativa subsp. japonica GN=CYP707A5 PE=2 SV=1	GO:0020037 ;GO:0016705 ;GO:0004497 ;GO:0005506 ;GO:0055114 ;GO:0020037 ;GO:0016705 ;GO:0004497 ;GO:0005506 ;GO:0055114	CYP707A	CYP707
Zoff251597	A	2357	2863	6830	16594	446	413	688	936	1716	2229	867	9523.79	13754	140.91	392.31	823.35	22.62	21.36	34.01	46.06	85.98	110.03	43.84	471.69	692.65	452.19	25.9967	80.69	402.727	gi|695022658|ref|XP_009398465.1|	PREDICTED: abscisic acid 8'-hydroxylase 1-like [Musa acuminata subsp. malaccensis]	rcu:RCOM_0814150	cytochrome P450, putative (EC:1.14.13.79); K09843 (+)-abscisic acid 8'-hydroxylase [EC:1.14.13.93]	At5g45340	[QI] KOG0157 Cytochrome P450 CYP4/CYP19/CYP26 subfamilies	sp|Q05JG2|ABAH1_ORYSJ	Abscisic acid 8'-hydroxylase 1 OS=Oryza sativa subsp. japonica GN=CYP707A5 PE=2 SV=1	GO:0016021 ;GO:0055114 ;GO:0010295 ;GO:0046345 ;GO:0020037 ;GO:0005789 ;GO:0005506 ;GO:0016021 ;GO:0055114 ;GO:0010295 ;GO:0046345 ;GO:0020037 ;GO:0005789 ;GO:0005506 ;GO:0016021 ;GO:0055114 ;GO:0010295 ;GO:0046345 ;GO:0020037 ;GO:0005789 ;GO:0005506 ;GO:0016021 ;GO:0055114 ;GO:0010295 ;GO:0046345 ;GO:0020037 ;GO:0005789 ;GO:0005506	CYP707A	CYP707
Zoff252001	C	796	0	0	0	0	0	0	0	3	0	0	0	20	0	0	0	0	0	0	0	0.15	0	0	0	1.01	0	0	0.05	0.336667	gi|299747027|ref|XP_001839366.2|	cytochrome P450 monooxygenase pc-3 [Coprinopsis cinerea okayama7#130]	cci:CC1G_08233	cytochrome P450 monooxygenase pc-3	At1g01600	[QI] KOG0157 Cytochrome P450 CYP4/CYP19/CYP26 subfamilies	sp|P16496|CP52C_CANMA	Cytochrome P450 52A3-A OS=Candida maltosa GN=CYP52A3-A PE=1 SV=3	GO:0016491 ;GO:0005488	CYP52A	CYP52
Zoff252002	C	1337	0	0	1	0	0	0	0	3	0	0	0	32	0	0	0.05	0	0	0	0	0.15	0	0	0	1.61	0.0166667	0	0.05	0.536667	gi|299747027|ref|XP_001839366.2|	cytochrome P450 monooxygenase pc-3 [Coprinopsis cinerea okayama7#130]	cci:CC1G_08233	cytochrome P450 monooxygenase pc-3	At3g56630	[QI] KOG0157 Cytochrome P450 CYP4/CYP19/CYP26 subfamilies	sp|P10615|CP52A_CANTR	Cytochrome P450 52A1 OS=Candida tropicalis GN=CYP52A1 PE=1 SV=3	GO:0020037 ;GO:0016705 ;GO:0004497 ;GO:0005506 ;GO:0055114	CYP52A	CYP52
Zoff256283	B	2643	5159.96	5118.77	6548.94	4129.13	4207.88	4742.02	6314	5823.23	5666.12	3075.89	4747.61	4286.04	253.96	294.02	324.94	209.46	217.6	234.44	310.72	291.77	279.69	155.54	235.14	215.84	290.973	220.5	294.06	202.173	gi|695077167|ref|XP_009385909.1|	PREDICTED: NADPH--cytochrome P450 reductase-like [Musa acuminata subsp. malaccensis]	osa:4347838	Os09g0558900; K00327 NADPH-ferrihemoprotein reductase [EC:1.6.2.4]	At4g30210	[C] KOG1158 NADP/FAD dependent oxidoreductase	sp|Q05001|NCPR_CATRO	NADPH--cytochrome P450 reductase OS=Catharanthus roseus GN=CPR PE=2 SV=1	GO:0005789 ;GO:0003958 ;GO:0005506 ;GO:0010181 ;GO:0055114 ;GO:0005789 ;GO:0003958 ;GO:0005506 ;GO:0010181 ;GO:0055114 ;GO:0005789 ;GO:0003958 ;GO:0005506 ;GO:0010181 ;GO:0055114 ;GO:0005789 ;GO:0003958 ;GO:0005506 ;GO:0010181 ;GO:0009536 ;GO:0055114	CYP	CYP
Zoff256292	C	2626	5414.12	4663.97	6203.71	3950.67	4409.01	4073.75	4699.54	4625.52	4427.41	3188.45	4136.22	4157.14	266.47	267.89	307.81	200.41	228	201.4	231.27	231.76	218.54	161.24	204.85	209.35	280.723	209.937	227.19	191.813	gi|695077167|ref|XP_009385909.1|	PREDICTED: NADPH--cytochrome P450 reductase-like [Musa acuminata subsp. malaccensis]	osa:4347838	Os09g0558900; K00327 NADPH-ferrihemoprotein reductase [EC:1.6.2.4]	At4g30210	[C] KOG1158 NADP/FAD dependent oxidoreductase	sp|Q05001|NCPR_CATRO	NADPH--cytochrome P450 reductase OS=Catharanthus roseus GN=CPR PE=2 SV=1	GO:0005789 ;GO:0003958 ;GO:0005506 ;GO:0010181 ;GO:0055114 ;GO:0005789 ;GO:0003958 ;GO:0005506 ;GO:0010181 ;GO:0055114	CYP	CYP
Zoff257165	B	1170	81	72	77	47	29	35	40.38	57	44.47	38.56	48.94	35	3.99	4.14	3.82	2.38	1.5	1.73	1.99	2.86	2.2	1.95	2.42	1.76	3.98333	1.87	2.35	2.04333	gi|695072967|ref|XP_009383632.1|	PREDICTED: cytochrome P450 71A1-like [Musa acuminata subsp. malaccensis]	vvi:100253593	hypothetical protein LOC100253593	At2g45550	[Q] KOG0156 Cytochrome P450 CYP2 subfamily	sp|P24465|C71A1_PERAE	Cytochrome P450 71A1 OS=Persea americana GN=CYP71A1 PE=1 SV=2	GO:0046872 ;GO:0044699 ;GO:0016491 ;GO:0031090 ;GO:0005783 ;GO:0044425 ;GO:0046872 ;GO:0044699 ;GO:0016491 ;GO:0031090 ;GO:0005783 ;GO:0044425 ;GO:0016491 ;GO:0005488	CYP71A	CYP71
Zoff257714	B	1340	474	414	431	917	902	887	546	274	490	694	670	610	23.33	23.78	21.39	46.52	46.64	43.85	26.87	13.73	24.19	35.09	33.18	30.72	22.8333	45.67	21.5967	32.9967	gi|695048547|ref|XP_009412188.1|	PREDICTED: cytochrome P450 94A1-like [Musa acuminata subsp. malaccensis]	sbi:SORBI_01g042470	hypothetical protein	At3g56630	[QI] KOG0157 Cytochrome P450 CYP4/CYP19/CYP26 subfamilies	sp|O81117|C94A1_VICSA	Cytochrome P450 94A1 OS=Vicia sativa GN=CYP94A1 PE=2 SV=2	GO:0046872 ;GO:0016491 ;GO:0016023 ;GO:0046872 ;GO:0016491 ;GO:0016023	CYP94A	CYP94
Zoff257715	B	691	183.02	139.9	132.95	366	321.28	322.22	161.71	106	121.92	199.58	185.56	199.98	9.01	8.04	6.6	18.57	16.61	15.93	7.96	5.31	6.02	10.09	9.19	10.07	7.88333	17.0367	6.43	9.78333	gi|695048547|ref|XP_009412188.1|	PREDICTED: cytochrome P450 94A1-like [Musa acuminata subsp. malaccensis]	osa:4327540	Os01g0804900	At3g56630	[QI] KOG0157 Cytochrome P450 CYP4/CYP19/CYP26 subfamilies	sp|Q9ZUX1|C94C1_ARATH	Cytochrome P450 94C1 OS=Arabidopsis thaliana GN=CYP94C1 PE=2 SV=1	GO:0046872 ;GO:0016491	CYP94C	CYP94
Zoff257716	B	486	72.78	41.69	44.77	116.78	155.97	133.08	76.02	51.37	60.29	92.77	81.57	84.54	3.58	2.39	2.22	5.92	8.07	6.58	3.74	2.57	2.98	4.69	4.04	4.26	2.73	6.85667	3.09667	4.33	gi|695048547|ref|XP_009412188.1|	PREDICTED: cytochrome P450 94A1-like [Musa acuminata subsp. malaccensis]	vvi:100267102	hypothetical protein LOC100267102	At3g56630	[QI] KOG0157 Cytochrome P450 CYP4/CYP19/CYP26 subfamilies	sp|O81117|C94A1_VICSA	Cytochrome P450 94A1 OS=Vicia sativa GN=CYP94A1 PE=2 SV=2	GO:0016023 ;GO:0009055 ;GO:0004497 ;GO:0005506 ;GO:0020037 ;GO:0016705 ;GO:0009507 ;GO:0019825 ;GO:0055114	CYP94A	CYP94
Zoff257721	B	486	73.22	55.31	78.23	130.22	105.03	116.92	62.98	26.63	77.71	79.23	79.43	83.46	3.6	3.18	3.88	6.61	5.43	5.78	3.1	1.33	3.84	4.01	3.93	4.2	3.55333	5.94	2.75667	4.04667	gi|695048547|ref|XP_009412188.1|	PREDICTED: cytochrome P450 94A1-like [Musa acuminata subsp. malaccensis]	vvi:100267102	hypothetical protein LOC100267102	At3g56630	[QI] KOG0157 Cytochrome P450 CYP4/CYP19/CYP26 subfamilies	sp|O81117|C94A1_VICSA	Cytochrome P450 94A1 OS=Vicia sativa GN=CYP94A1 PE=2 SV=2	GO:0016023 ;GO:0009055 ;GO:0004497 ;GO:0005506 ;GO:0020037 ;GO:0016705 ;GO:0009507 ;GO:0019825 ;GO:0055114	CYP94A	CYP94
Zoff260851	C	2030	0	0	3	0	0	0	115	0	11	0	1	0	0	0	0.15	0	0	0	5.66	0	0.54	0	0.05	0	0.05	0	2.06667	0.0166667	gi|576995267|gb|EUC67666.1|	cytochrome P450 family protein [Rhizoctonia solani AG-3 Rhs1AP]	lbc:LACBIDRAFT_311267	potential P450 cytochrome	Hs13787189	[Q] KOG0156 Cytochrome P450 CYP2 subfamily	sp|B8NHY4|ORDA_ASPFN	O-methylsterigmatocystin oxidoreductase OS=Aspergillus flavus (strain ATCC 200026 / FGSC A1120 / NRRL 3357 / JCM 12722 / SRRC 167) GN=ordA PE=2 SV=1	GO:0020037 ;GO:0016705 ;GO:0004497 ;GO:0005506 ;GO:0055114 ;GO:0020037 ;GO:0016705 ;GO:0004497 ;GO:0005506 ;GO:0055114	CYP	CYP
Zoff261175	C	2094	35	4	68	0	1	0	4	9	8	5	2	50	1.72	0.23	3.37	0	0.05	0	0.2	0.45	0.39	0.25	0.1	2.52	1.77333	0.0166667	0.346667	0.956667	gi|656906880|gb|KEF52621.1|	cytochrome P450, family 51 (sterol 14-demethylase) [Exophiala aquamarina CBS 119918]	nfi:NFIA_024690	14-alpha sterol demethylase Cyp51B; K05917 cytochrome P450, family 51 (sterol 14-demethylase) [EC:1.14.13.70]	SPAC13A11.02c	[Q] KOG0684 Cytochrome P450	sp|O14442|CP51_UNCNE	Eburicol 14-alpha-demethylase OS=Uncinula necator GN=CYP51 PE=2 SV=2	GO:0035690 ;GO:0008144 ;GO:0020037 ;GO:0016705 ;GO:0004497 ;GO:0005506 ;GO:0032259 ;GO:0009055 ;GO:0055114 ;GO:0008168	CYP51	CYP51
Zoff262669	D	819	773.4	416.88	382.15	18614.4	2622.65	10305.5	495.99	531.56	413	801	746.01	1860	38.06	23.95	18.96	944.27	135.62	509.48	24.41	26.63	20.39	40.51	36.95	93.67	26.99	529.79	23.81	57.0433	gi|695010775|ref|XP_009392073.1|	PREDICTED: cytochrome P450 71A1-like [Musa acuminata subsp. malaccensis]	vvi:100260935	hypothetical protein LOC100260935	At4g31500	[Q] KOG0156 Cytochrome P450 CYP2 subfamily	sp|P24465|C71A1_PERAE	Cytochrome P450 71A1 OS=Persea americana GN=CYP71A1 PE=1 SV=2	GO:0020037 ;GO:0016705 ;GO:0004497 ;GO:0005506 ;GO:0055114 ;GO:0020037 ;GO:0016705 ;GO:0004497 ;GO:0005506 ;GO:0055114 ;GO:0020037 ;GO:0016705 ;GO:0004497 ;GO:0005506 ;GO:0055114	CYP71A	CYP71
Zoff262673	C	652	105.08	62.88	53.41	6968.46	794.26	3681.6	129.19	82.24	108.53	331.14	232.68	811.66	5.17	3.61	2.65	353.5	41.07	182.01	6.36	4.12	5.36	16.75	11.52	40.87	3.81	192.193	5.28	23.0467	gi|695010775|ref|XP_009392073.1|	PREDICTED: cytochrome P450 71A1-like [Musa acuminata subsp. malaccensis]	pop:POPTR_550924	CYP83F3v1; cytochrome P450	At3g26310	[Q] KOG0156 Cytochrome P450 CYP2 subfamily	sp|Q9LIP5|C71BW_ARATH	Cytochrome P450 71B35 OS=Arabidopsis thaliana GN=CYP71B35 PE=2 SV=1	GO:0046872 ;GO:0016491 ;GO:0020037 ;GO:0016705 ;GO:0004497 ;GO:0005506 ;GO:0055114	CYP71B	CYP71
Zoff262684	C	727	22	21	24	641	110.93	657.65	30	38	24	422	41	85	1.08	1.21	1.19	32.52	5.74	32.51	1.48	1.9	1.18	21.34	2.03	4.28	1.16	23.59	1.52	9.21667	gi|695058403|ref|XP_009417516.1|	PREDICTED: cytochrome P450 CYP73A100-like [Musa acuminata subsp. malaccensis]	pop:POPTR_584578	C4H3; trans-cinnamate 4-monooxygenase (EC:1.14.13.11); K00487 trans-cinnamate 4-monooxygenase [EC:1.14.13.11]	At2g30490	[Q] KOG0156 Cytochrome P450 CYP2 subfamily	sp|H2DH22|C7A10_PANGI	Cytochrome P450 CYP73A100 OS=Panax ginseng PE=2 SV=1	GO:0016023 ;GO:0004497 ;GO:0005506 ;GO:0020037 ;GO:0016705 ;GO:0016020 ;GO:0055114	CYP73A	CYP73
Zoff262685	C	563	46	39.04	88	1129.79	470.37	2396.15	65	111	68	2040.2	131	254	2.26	2.24	4.37	57.31	24.32	118.46	3.2	5.56	3.36	103.17	6.49	12.79	2.95667	66.6967	4.04	40.8167	gi|695008971|ref|XP_009391094.1|	PREDICTED: cytochrome P450 CYP73A100-like [Musa acuminata subsp. malaccensis]	osa:4329329	Os02g0467600; K00487 trans-cinnamate 4-monooxygenase [EC:1.14.13.11]	At2g30490	[Q] KOG0156 Cytochrome P450 CYP2 subfamily	sp|H2DH22|C7A10_PANGI	Cytochrome P450 CYP73A100 OS=Panax ginseng PE=2 SV=1	GO:0016023 ;GO:0004497 ;GO:0005506 ;GO:0020037 ;GO:0016705 ;GO:0016020 ;GO:0055114	CYP73A	CYP73
Zoff262686	C	563	0	1.96	0	29.21	5.7	61.2	0	0	0	80.8	0	0	0	0.11	0	1.48	0.29	3.03	0	0	0	4.09	0	0	0.0366667	1.6	0	1.36333	gi|695008971|ref|XP_009391094.1|	PREDICTED: cytochrome P450 CYP73A100-like [Musa acuminata subsp. malaccensis]	osa:4329329	Os02g0467600; K00487 trans-cinnamate 4-monooxygenase [EC:1.14.13.11]	At2g30490	[Q] KOG0156 Cytochrome P450 CYP2 subfamily	sp|H2DH22|C7A10_PANGI	Cytochrome P450 CYP73A100 OS=Panax ginseng PE=2 SV=1	GO:0016023 ;GO:0004497 ;GO:0005506 ;GO:0020037 ;GO:0016705 ;GO:0016020 ;GO:0055114	CYP73A	CYP73
Zoff262690	B	474	18	10	35.94	454	125.92	725.46	18.7	40.27	31.97	671.49	39	83.49	0.89	0.57	1.78	23.03	6.51	35.87	0.92	2.02	1.58	33.96	1.93	4.2	1.08	21.8033	1.50667	13.3633	gi|695058403|ref|XP_009417516.1|	PREDICTED: cytochrome P450 CYP73A100-like [Musa acuminata subsp. malaccensis]	osa:4329324	Os02g0467000; K00487 trans-cinnamate 4-monooxygenase [EC:1.14.13.11]	At2g30490	[Q] KOG0156 Cytochrome P450 CYP2 subfamily	sp|H2DH22|C7A10_PANGI	Cytochrome P450 CYP73A100 OS=Panax ginseng PE=2 SV=1	GO:0016023 ;GO:0004497 ;GO:0005506 ;GO:0020037 ;GO:0016705 ;GO:0055114	CYP73A	CYP73
Zoff262691	B	1247	108	99	237.06	4717	1278.08	6980.54	174.3	350.73	222.03	5666.51	271	667.51	5.32	5.69	11.76	239.28	66.09	345.1	8.58	17.57	10.96	286.55	13.42	33.62	7.59	216.823	12.37	111.197	gi|570932606|gb|AHF20176.1|	cinnamate 4-hydroxylase, partial [Musa acuminata AAA Group]	sbi:SORBI_04g017460	hypothetical protein; K00487 trans-cinnamate 4-monooxygenase [EC:1.14.13.11]	At2g30490	[Q] KOG0156 Cytochrome P450 CYP2 subfamily	sp|H2DH22|C7A10_PANGI	Cytochrome P450 CYP73A100 OS=Panax ginseng PE=2 SV=1	GO:0016023 ;GO:0004497 ;GO:0005506 ;GO:0020037 ;GO:0016705 ;GO:0055114 ;GO:0020037 ;GO:0016705 ;GO:0004497 ;GO:0005506 ;GO:0055114 ;GO:0016023 ;GO:0004497 ;GO:0005506 ;GO:0020037 ;GO:0016705 ;GO:0055114 ;GO:0016023 ;GO:0004497 ;GO:0005506 ;GO:0020037 ;GO:0016705 ;GO:0055114	CYP73A	CYP73
Zoff262872	B	2206	15	15	340	1	1	0	9	2	3	7	2	17	0.74	0.86	16.87	0.05	0.05	0	0.44	0.1	0.15	0.35	0.1	0.86	6.15667	0.0333333	0.23	0.436667	gi|656917304|gb|KEF62882.1|	hypothetical protein A1O9_00856 [Exophiala aquamarina CBS 119918]	pcs:Pc22g19240	Pc22g19240	At4g00360	[QI] KOG0157 Cytochrome P450 CYP4/CYP19/CYP26 subfamilies	sp|Q9Y758|CP52M_DEBHN	Cytochrome P450 52A13 OS=Debaryomyces hansenii GN=CYP52A13 PE=2 SV=1	GO:0020037 ;GO:0016712 ;GO:0005506 ;GO:0055114	CYP52A	CYP52
Zoff263282	C	2221	1210	1082	1416	1851	1442	1880	1406	1695	1427	1547	1324	1275	59.55	62.15	70.26	93.9	74.57	92.94	69.19	84.93	70.44	78.23	65.57	64.21	63.9867	87.1367	74.8533	69.3367	gi|695071529|ref|XP_009382841.1|	PREDICTED: NADPH--cytochrome P450 reductase-like [Musa acuminata subsp. malaccensis]	osa:4347838	Os09g0558900; K00327 NADPH-ferrihemoprotein reductase [EC:1.6.2.4]	At4g30210	[C] KOG1158 NADP/FAD dependent oxidoreductase	sp|Q05001|NCPR_CATRO	NADPH--cytochrome P450 reductase OS=Catharanthus roseus GN=CPR PE=2 SV=1	GO:0005789 ;GO:0003958 ;GO:0005506 ;GO:0010181 ;GO:0055114	CYP	CYP
Zoff263283	D	1481	940	878.04	1141	2147.1	1756.64	1936.99	1197.13	1032	1239	1218	1228	1428.93	46.26	50.43	56.61	108.92	90.84	95.76	58.91	51.71	61.16	61.59	60.82	71.96	51.1	98.5067	57.26	64.79	gi|313760501|dbj|BAJ41269.1|	NADPH-P450 reductase 2 [Zingiber officinale]	osa:4347838	Os09g0558900; K00327 NADPH-ferrihemoprotein reductase [EC:1.6.2.4]	At4g30210	[C] KOG1158 NADP/FAD dependent oxidoreductase	sp|Q05001|NCPR_CATRO	NADPH--cytochrome P450 reductase OS=Catharanthus roseus GN=CPR PE=2 SV=1	GO:0005789 ;GO:0003958 ;GO:0005506 ;GO:0010181 ;GO:0055114	CYP	CYP
Zoff263285	B	2611	7706.67	4108.61	3443.11	530.44	500.84	366	1777.56	4498.44	2221	2139.01	2175	5419.38	379.3	235.99	170.84	26.91	25.9	18.09	87.48	225.39	109.63	108.17	107.72	272.92	262.043	23.6333	140.833	162.937	gi|313760499|dbj|BAJ41268.1|	NADPH-P450 reductase 1 [Zingiber officinale]	osa:4347838	Os09g0558900; K00327 NADPH-ferrihemoprotein reductase [EC:1.6.2.4]	At4g24520	[C] KOG1158 NADP/FAD dependent oxidoreductase	sp|Q05001|NCPR_CATRO	NADPH--cytochrome P450 reductase OS=Catharanthus roseus GN=CPR PE=2 SV=1	GO:0005789 ;GO:0003958 ;GO:0005506 ;GO:0010181 ;GO:0055114 ;GO:0005789 ;GO:0003958 ;GO:0005506 ;GO:0010181 ;GO:0055114 ;GO:0005789 ;GO:0003958 ;GO:0005506 ;GO:0010181 ;GO:0055114 ;GO:0005789 ;GO:0003958 ;GO:0005506 ;GO:0010181 ;GO:0055114 ;GO:0005789 ;GO:0003958 ;GO:0005506 ;GO:0010181 ;GO:0055114 ;GO:0003958 ;GO:0005506 ;GO:0010181 ;GO:0016020 ;GO:0005783 ;GO:0055114 ;GO:0005789 ;GO:0003958 ;GO:…	CYP	CYP
Zoff263289	C	828	12	6	1	32	7	5	8	16	15	18	5	6	0.59	0.34	0.05	1.62	0.36	0.25	0.39	0.8	0.74	0.91	0.25	0.3	0.326667	0.743333	0.643333	0.486667	gi|313760499|dbj|BAJ41268.1|	NADPH-P450 reductase 1 [Zingiber officinale]	osa:4347838	Os09g0558900; K00327 NADPH-ferrihemoprotein reductase [EC:1.6.2.4]	At4g30210	[C] KOG1158 NADP/FAD dependent oxidoreductase	sp|Q9SUM3|NCPR2_ARATH	NADPH--cytochrome P450 reductase 2 OS=Arabidopsis thaliana GN=ATR2 PE=1 SV=1	GO:0005789 ;GO:0003958 ;GO:0005506 ;GO:0010181 ;GO:0055114 ;GO:0005789 ;GO:0003958 ;GO:0005506 ;GO:0010181 ;GO:0055114 ;GO:0005789 ;GO:0003958 ;GO:0005506 ;GO:0010181 ;GO:0055114	CYP	CYP
Zoff263364	C	2378	37	7	400	2	3	0	15	19	7	2	3	66	1.82	0.4	19.85	0.1	0.16	0	0.74	0.95	0.35	0.1	0.15	3.32	7.35667	0.0866667	0.68	1.19	gi|656916329|gb|KEF61908.1|	hypothetical protein A1O9_03480 [Exophiala aquamarina CBS 119918]	ure:UREG_01634	similar to n-alkane-inducible cytochrome P-450	At4g00360	[QI] KOG0157 Cytochrome P450 CYP4/CYP19/CYP26 subfamilies	sp|Q9Y757|CP52L_DEBHN	Cytochrome P450 52A12 OS=Debaryomyces hansenii GN=CYP52A12 PE=2 SV=2	GO:0020037 ;GO:0016712 ;GO:0005506 ;GO:0055114 ;GO:0020037 ;GO:0016712 ;GO:0005506 ;GO:0055114	CYP52A	CYP52
Zoff269525	B	2789	61	61	288	59	47	66	109	192	116	953	41	29	3	3.5	14.29	2.99	2.43	3.26	5.36	9.62	5.73	48.19	2.03	1.46	6.93	2.89333	6.90333	17.2267	gi|695021672|ref|XP_009397933.1|	PREDICTED: cytochrome P450 86A2-like [Musa acuminata subsp. malaccensis]	osa:4330250	Os02g0666500	At4g00360	[QI] KOG0157 Cytochrome P450 CYP4/CYP19/CYP26 subfamilies	sp|O23066|C86A2_ARATH	Cytochrome P450 86A2 OS=Arabidopsis thaliana GN=CYP86A2 PE=1 SV=1	GO:0020037 ;GO:0016020 ;GO:0016705 ;GO:0004497 ;GO:0005506 ;GO:0055114 ;GO:0020037 ;GO:0016020 ;GO:0016705 ;GO:0004497 ;GO:0005506 ;GO:0055114 ;GO:0020037 ;GO:0016705 ;GO:0004497 ;GO:0005506 ;GO:0055114 ;GO:0009055 ;GO:0005506 ;GO:0020037 ;GO:0006631 ;GO:0016020 ;GO:0018685 ;GO:0055114	CYP86A	CYP86
Zoff269536	B	520	9	13	34	2	2	5	17	24	13	25	11	9	0.44	0.75	1.69	0.1	0.1	0.25	0.84	1.2	0.64	1.26	0.54	0.45	0.96	0.15	0.893333	0.75	gi|695021672|ref|XP_009397933.1|	PREDICTED: cytochrome P450 86A2-like [Musa acuminata subsp. malaccensis]	vvi:100247907	hypothetical protein LOC100247907	At2g45970	[QI] KOG0157 Cytochrome P450 CYP4/CYP19/CYP26 subfamilies	sp|O80823|C86A8_ARATH	Cytochrome P450 86A8 OS=Arabidopsis thaliana GN=CYP86A8 PE=2 SV=1	GO:0009055 ;GO:0005506 ;GO:0020037 ;GO:0006631 ;GO:0018685 ;GO:0055114	CYP86A	CYP86
Zoff269537	B	985	76	93	19	0	3	2	44	62	16	120	10	267	3.74	5.34	0.94	0	0.16	0.1	2.17	3.11	0.79	6.07	0.5	13.45	3.34	0.0866667	2.02333	6.67333	gi|695021619|ref|XP_009397903.1|	PREDICTED: cytochrome P450 86B1-like [Musa acuminata subsp. malaccensis]	osa:4331568	Os03g0140100	At4g39490	[QI] KOG0157 Cytochrome P450 CYP4/CYP19/CYP26 subfamilies	sp|Q9FMY1|C86B1_ARATH	Cytochrome P450 86B1 OS=Arabidopsis thaliana GN=CYP86B1 PE=2 SV=1	GO:0005488 ;GO:0016491 ;GO:0016023	CYP86B	CYP86
Zoff269538	B	2106	613	874	614	39	171	73	1818	4722	2052	3507	1576	2310	30.17	50.2	30.47	1.98	8.84	3.61	89.47	236.59	101.29	177.35	78.05	116.33	36.9467	4.81	142.45	123.91	gi|695021619|ref|XP_009397903.1|	PREDICTED: cytochrome P450 86B1-like [Musa acuminata subsp. malaccensis]	osa:4331568	Os03g0140100	At2g23180	[QI] KOG0157 Cytochrome P450 CYP4/CYP19/CYP26 subfamilies	sp|Q9FMY1|C86B1_ARATH	Cytochrome P450 86B1 OS=Arabidopsis thaliana GN=CYP86B1 PE=2 SV=1	GO:0005488 ;GO:0016491 ;GO:0016023	CYP86B	CYP86
Zoff269539	B	1157	49	43	173	25	29	20	64	179	95	428	27	26	2.41	2.47	8.58	1.27	1.5	0.99	3.15	8.97	4.69	21.64	1.34	1.31	4.48667	1.25333	5.60333	8.09667	gi|695025959|ref|XP_009400252.1|	PREDICTED: cytochrome P450 86A2-like [Musa acuminata subsp. malaccensis]	osa:4330250	Os02g0666500	At4g00360	[QI] KOG0157 Cytochrome P450 CYP4/CYP19/CYP26 subfamilies	sp|O23066|C86A2_ARATH	Cytochrome P450 86A2 OS=Arabidopsis thaliana GN=CYP86A2 PE=1 SV=1	GO:0020037 ;GO:0016020 ;GO:0016705 ;GO:0004497 ;GO:0005506 ;GO:0055114 ;GO:0020037 ;GO:0016020 ;GO:0016705 ;GO:0004497 ;GO:0005506 ;GO:0055114	CYP86A	CYP86
Zoff270677	C	3315	41	12	31	4	5	13	0	1	0	0	3	54	2.02	0.69	1.54	0.2	0.26	0.64	0	0.05	0	0	0.15	2.72	1.41667	0.366667	0.0166667	0.956667	gi|660966597|gb|KEP51051.1|	putative cytochrome P450 family:NADPH-P450 family reductase [Rhizoctonia solani 123E]	fgr:FG01972.1	C505_FUSOX Bifunctional P-450:NADPH-P450 reductase (Fatty acid omega-hydroxylase) (P450foxy); K14338 cytochrome P450 / NADPH-cytochrome P450 reductase [EC:1.14.14.1 1.6.2.4]	7297099	[C] KOG1158 NADP/FAD dependent oxidoreductase	sp|Q9Y8G7|C505_FUSOX	Bifunctional P-450:NADPH-P450 reductase OS=Fusarium oxysporum GN=CYP505 PE=1 SV=1	GO:0003958 ;GO:0005506 ;GO:0010181 ;GO:0020037 ;GO:0008270 ;GO:0070330 ;GO:0055114 ;GO:0003958 ;GO:0005506 ;GO:0010181 ;GO:0020037 ;GO:0008270 ;GO:0070330 ;GO:0055114 ;GO:0003958 ;GO:0005506 ;GO:0010181 ;GO:0020037 ;GO:0008270 ;GO:0070330 ;GO:0055114 ;GO:0003958 ;GO:0005506 ;GO:0010181 ;GO:0020037 ;GO:0008270 ;GO:0070330 ;GO:0055114 ;GO:0003958 ;GO:0005506 ;GO:0010181 ;GO:0020037 ;GO:0008270 ;GO:…	CYP505	CYP505
Zoff271199	B	2409	17	39	29	22	26	13	26	17	19	17	43	33	0.84	2.24	1.44	1.12	1.34	0.64	1.28	0.85	0.94	0.86	2.13	1.66	1.50667	1.03333	1.02333	1.55	gi|695048220|ref|XP_009412014.1|	PREDICTED: cytochrome P450 77A3-like [Musa acuminata subsp. malaccensis]	zma:100273592	hypothetical protein LOC100273592	At1g11600	[Q] KOG0156 Cytochrome P450 CYP2 subfamily	sp|O48928|C77A3_SOYBN	Cytochrome P450 77A3 OS=Glycine max GN=CYP77A3 PE=2 SV=1	GO:0020037 ;GO:0016705 ;GO:0004497 ;GO:0005506 ;GO:0009055 ;GO:0055114 ;GO:0005886 ;GO:0020037 ;GO:0016705 ;GO:0004497 ;GO:0005506 ;GO:0009055 ;GO:0055114 ;GO:0005886 ;GO:0020037 ;GO:0016705 ;GO:0004497 ;GO:0005506 ;GO:0009055 ;GO:0055114 ;GO:0005886 ;GO:0020037 ;GO:0016705 ;GO:0004497 ;GO:0005506 ;GO:0009055 ;GO:0055114 ;GO:0005886 ;GO:0020037 ;GO:0016705 ;GO:0004497 ;GO:0005506 ;GO:0009055 ;GO:…	CYP77A	CYP77
Zoff272248	C	1231	302	180	621	9318.39	1728.02	3226.27	4416.79	196	2658.34	5240.47	625.48	1805.36	14.86	10.34	30.81	472.7	89.36	159.5	217.36	9.82	131.22	265.01	30.98	90.92	18.67	240.52	119.467	128.97	gi|403399730|sp|E3W9C4.1|C71A1_ZINZE	RecName: Full=Alpha-humulene 10-hydroxylase [Zingiber zerumbet]	rcu:RCOM_0520560	cytochrome P450, putative (EC:1.14.13.68)	At5g25120	[Q] KOG0156 Cytochrome P450 CYP2 subfamily	sp|E3W9C4|C71A1_ZINZE	Alpha-humulene 10-hydroxylase OS=Zingiber zerumbet GN=CYP71BA1 PE=1 SV=1	GO:0016491 ;GO:0005488 ;GO:0046872 ;GO:0016491 ;GO:0016491 ;GO:0005488 ;GO:0016491 ;GO:0005488 ;GO:0016491 ;GO:0005488 ;GO:0005488 ;GO:0016491 ;GO:0046872 ;GO:0004497 ;GO:0016705 ;GO:0016020 ;GO:0016491 ;GO:0005488 ;GO:0046872 ;GO:0016491 ;GO:0016020 ;GO:0046872 ;GO:0004497 ;GO:0016705	CYP71B	CYP71
Zoff272253	D	365	4	4	11.31	218.51	31.01	58.07	45.03	3	24.92	55.54	1	18.99	0.2	0.23	0.56	11.08	1.6	2.87	2.22	0.15	1.23	2.81	0.05	0.96	0.33	5.18333	1.2	1.27333	gi|403399730|sp|E3W9C4.1|C71A1_ZINZE	RecName: Full=Alpha-humulene 10-hydroxylase [Zingiber zerumbet]	osa:4342734	Os07g0218700	At3g26210	[Q] KOG0156 Cytochrome P450 CYP2 subfamily	sp|E3W9C4|C71A1_ZINZE	Alpha-humulene 10-hydroxylase OS=Zingiber zerumbet GN=CYP71BA1 PE=1 SV=1	GO:0020037 ;GO:0016705 ;GO:0004497 ;GO:0005506 ;GO:0055114 ;GO:0016023 ;GO:0004497 ;GO:0005506 ;GO:0020037 ;GO:0016705 ;GO:0055114	CYP71B	CYP71
Zoff272254	D	358	3.12	7.84	5.97	127.72	18.15	43.13	34.42	3.51	16.29	39.25	8	10.17	0.15	0.45	0.3	6.48	0.94	2.13	1.69	0.18	0.8	1.98	0.4	0.51	0.3	3.18333	0.89	0.963333	gi|403399730|sp|E3W9C4.1|C71A1_ZINZE	RecName: Full=Alpha-humulene 10-hydroxylase [Zingiber zerumbet]	osa:4348722	Os10g0440000	At4g13770	[Q] KOG0156 Cytochrome P450 CYP2 subfamily	sp|E3W9C4|C71A1_ZINZE	Alpha-humulene 10-hydroxylase OS=Zingiber zerumbet GN=CYP71BA1 PE=1 SV=1	GO:0016023 ;GO:0004497 ;GO:0005506 ;GO:0020037 ;GO:0016705 ;GO:0055114	CYP71B	CYP71
Zoff272255	D	377	7.01	8	8.11	177.29	16.35	23.03	59.8	10	58.25	70.48	3	20.09	0.35	0.46	0.4	8.99	0.85	1.14	2.94	0.5	2.88	3.56	0.15	1.01	0.403333	3.66	2.10667	1.57333	gi|403399730|sp|E3W9C4.1|C71A1_ZINZE	RecName: Full=Alpha-humulene 10-hydroxylase [Zingiber zerumbet]	sbi:SORBI_01g015340	hypothetical protein	At3g26210	[Q] KOG0156 Cytochrome P450 CYP2 subfamily	sp|E3W9C4|C71A1_ZINZE	Alpha-humulene 10-hydroxylase OS=Zingiber zerumbet GN=CYP71BA1 PE=1 SV=1	GO:0016023 ;GO:0004497 ;GO:0005506 ;GO:0020037 ;GO:0016705 ;GO:0055114 ;GO:0020037 ;GO:0016705 ;GO:0004497 ;GO:0005506 ;GO:0055114	CYP71B	CYP71
Zoff272259	D	341	38.7	9.17	1.09	7.02	9.19	20.87	8.26	87.86	17.63	2.08	6.29	5.12	1.9	0.53	0.05	0.36	0.48	1.03	0.41	4.4	0.87	0.11	0.31	0.26	0.826667	0.623333	1.89333	0.226667	gi|403399730|sp|E3W9C4.1|C71A1_ZINZE	RecName: Full=Alpha-humulene 10-hydroxylase [Zingiber zerumbet]	sbi:SORBI_01g015080	hypothetical protein	At3g26270	[Q] KOG0156 Cytochrome P450 CYP2 subfamily	sp|E3W9C4|C71A1_ZINZE	Alpha-humulene 10-hydroxylase OS=Zingiber zerumbet GN=CYP71BA1 PE=1 SV=1	GO:0046872 ;GO:0016491 ;GO:0016023	CYP71B	CYP71
Zoff272264	D	397	46.29	29.83	103.8	1904.45	272.88	703.83	637.76	47.14	374.72	774.44	104.23	285.43	2.28	1.71	5.15	96.61	14.11	34.8	31.38	2.36	18.5	39.16	5.16	14.37	3.04667	48.5067	17.4133	19.5633	gi|403399730|sp|E3W9C4.1|C71A1_ZINZE	RecName: Full=Alpha-humulene 10-hydroxylase [Zingiber zerumbet]	sbi:SORBI_01g015340	hypothetical protein	At3g26830	[Q] KOG0156 Cytochrome P450 CYP2 subfamily	sp|E3W9C4|C71A1_ZINZE	Alpha-humulene 10-hydroxylase OS=Zingiber zerumbet GN=CYP71BA1 PE=1 SV=1	GO:0016023 ;GO:0004497 ;GO:0005506 ;GO:0020037 ;GO:0016705 ;GO:0055114 ;GO:0046872 ;GO:0016491 ;GO:0016023	CYP71B	CYP71
Zoff273033	C	1808	0	0	0	0	0	0	0	10	0	0	2	113	0	0	0	0	0	0	0	0.5	0	0	0.1	5.69	0	0	0.166667	1.93	gi|299740282|ref|XP_002910303.1|	cytochrome P450 monooxygenase pc-1 [Coprinopsis cinerea okayama7#130]	cci:CC1G_15732	cytochrome P450 monooxygenase pc-1	At1g34540	[QI] KOG0157 Cytochrome P450 CYP4/CYP19/CYP26 subfamilies	sp|P30608|CP52F_CANTR	Cytochrome P450 52A6 OS=Candida tropicalis GN=CYP52A6 PE=2 SV=1	GO:0046872 ;GO:0016491 ;GO:0046872 ;GO:0016491 ;GO:0046872 ;GO:0016491	CYP52A	CYP52
Zoff276674	A	2542	1082	865	898	755	926	705	1385	1661	1290	1190	994	876	53.25	49.68	44.56	38.3	47.89	34.85	68.16	83.22	63.68	60.18	49.23	44.12	49.1633	40.3467	71.6867	51.1767	gi|695039137|ref|XP_009407093.1|	PREDICTED: isoflavone 2'-hydroxylase-like [Musa acuminata subsp. malaccensis]	rcu:RCOM_1588370	cytochrome P450, putative (EC:1.14.13.89)	At2g23190	[Q] KOG0156 Cytochrome P450 CYP2 subfamily	sp|Q6WNQ8|C81E8_MEDTR	Cytochrome P450 81E8 OS=Medicago truncatula GN=CYP81E8 PE=2 SV=1	GO:0046872 ;GO:0016705 ;GO:0004497 ;GO:0016491 ;GO:0005488 ;GO:0046872 ;GO:0016705 ;GO:0004497	CYP81E	CYP81
Zoff276996	C	3138	897	753	759	1321.87	950	1425	1030	1268	1133.03	1153	954	1079	44.15	43.25	37.66	67.06	49.13	70.45	50.69	63.53	55.93	58.31	47.25	54.34	41.6867	62.2133	56.7167	53.3	gi|695051629|ref|XP_009413846.1|	PREDICTED: cytochrome P450 710A1-like [Musa acuminata subsp. malaccensis]	vvi:100255505	similar to sterol 22-desaturase; K09832 cytochrome P450, family 710, subfamily A	At2g34500	[QI] KOG0157 Cytochrome P450 CYP4/CYP19/CYP26 subfamilies	sp|O64697|C7101_ARATH	Cytochrome P450 710A1 OS=Arabidopsis thaliana GN=CYP710A1 PE=1 SV=1	GO:0016023 ;GO:0004497 ;GO:0005506 ;GO:0020037 ;GO:0016705 ;GO:0022900	CYP710A	CYP710
Zoff280009	A	2772	1280	1314	1198	581	864	753	1065	1629	911	918	770	729	63	75.47	59.44	29.47	44.68	37.23	52.41	81.62	44.97	46.42	38.14	36.71	65.97	37.1267	59.6667	40.4233	gi|695078423|ref|XP_009386597.1|	PREDICTED: protein LUTEIN DEFICIENT 5, chloroplastic [Musa acuminata subsp. malaccensis]	sbi:SORBI_04g037300	hypothetical protein	At1g31800	[QI] KOG0157 Cytochrome P450 CYP4/CYP19/CYP26 subfamilies	sp|Q93VK5|LUT5_ARATH	Protein LUTEIN DEFICIENT 5, chloroplastic OS=Arabidopsis thaliana GN=CYP97A3 PE=1 SV=1	GO:0006655 ;GO:0006636 ;GO:0043085 ;GO:0010291 ;GO:0019252 ;GO:0070330 ;GO:0016123 ;GO:0020037 ;GO:0000023 ;GO:0009055 ;GO:0015995 ;GO:0019288 ;GO:0005506 ;GO:0031969 ;GO:0055114 ;GO:0006655 ;GO:0006636 ;GO:0043085 ;GO:0010291 ;GO:0019252 ;GO:0070330 ;GO:0016123 ;GO:0020037 ;GO:0000023 ;GO:0009055 ;GO:0015995 ;GO:0019288 ;GO:0005506 ;GO:0031969 ;GO:0055114 ;GO:0006655 ;GO:0006636 ;GO:0043085 ;GO:…	CYP97A	CYP97
Zoff282434	C	1950	166	39	75	5	0	2	0	0	0	0	1	28	8.17	2.24	3.72	0.25	0	0.1	0	0	0	0	0.05	1.41	4.71	0.116667	0	0.486667	gi|660963519|gb|KEP48876.1|	lanosterol 14-alpha-demethylase [Rhizoctonia solani 123E]	cci:CC1G_08364	lanosterol 14-alpha-demethylase	SPAC13A11.02c	[Q] KOG0684 Cytochrome P450	sp|P49602|CP51_USTMA	Lanosterol 14-alpha demethylase OS=Ustilago maydis (strain 521 / FGSC 9021) GN=ERG11 PE=3 SV=1	GO:0020037 ;GO:0016705 ;GO:0004497 ;GO:0005506 ;GO:0032259 ;GO:0055114 ;GO:0008168	CYP51A	CYP51
Zoff283768	B	897	235	249	165	30616	16791	20524	245	154	202	2560	2813	8631	11.57	14.3	8.19	1553.09	868.31	1014.67	12.06	7.72	9.97	129.46	139.32	434.65	11.3533	1145.36	9.91667	234.477	gi|313150272|dbj|BAJ39894.1|	P450 mono-oxygenase [Zingiber zerumbet]	osa:4328532	Os02g0185200	At2g45560	[Q] KOG0156 Cytochrome P450 CYP2 subfamily	sp|E3W9C4|C71A1_ZINZE	Alpha-humulene 10-hydroxylase OS=Zingiber zerumbet GN=CYP71BA1 PE=1 SV=1	GO:0016023 ;GO:0004497 ;GO:0005506 ;GO:0020037 ;GO:0016705 ;GO:0016021 ;GO:0055114	CYP71B	CYP71
Zoff283769	B	2023	7625	4450	4516	23270	14580	16861	10609	10604	12696	15538	6361	15024	375.28	255.6	224.07	1180.44	753.97	833.57	522.08	531.31	626.7	785.74	315.04	756.6	284.983	922.66	560.03	619.127	gi|313150272|dbj|BAJ39894.1|	P450 mono-oxygenase [Zingiber zerumbet]	rcu:RCOM_1574340	cytochrome P450, putative (EC:1.14.13.68)	At3g26300	[Q] KOG0156 Cytochrome P450 CYP2 subfamily	sp|A6YIH8|C7D55_HYOMU	Premnaspirodiene oxygenase OS=Hyoscyamus muticus GN=CYP71D55 PE=1 SV=1	GO:0016020 ;GO:0046872 ;GO:0016491 ;GO:0016705 ;GO:0004497 ;GO:0005488	CYP71D	CYP71
Zoff283771	B	5246	1004	963	1214	673	532	554	702	898	816	960	628	723	49.41	55.31	60.24	34.14	27.51	27.39	34.55	44.99	40.28	48.55	31.1	36.41	54.9867	29.68	39.94	38.6867	gi|695014288|ref|XP_009393959.1|	PREDICTED: cytokinin hydroxylase-like [Musa acuminata subsp. malaccensis]	pop:POPTR_575832	CYP715A3; cytochrome P450	At5g52400	[QI] KOG0157 Cytochrome P450 CYP4/CYP19/CYP26 subfamilies	sp|O48786|C734A_ARATH	Cytochrome P450 734A1 OS=Arabidopsis thaliana GN=CYP734A1 PE=2 SV=1	GO:0055085 ;GO:0016021 ;GO:0016021 ;GO:0016023 ;GO:0055085 ;GO:0055085 ;GO:0016021 ;GO:0055085 ;GO:0016021 ;GO:0055085 ;GO:0016021 ;GO:0016021 ;GO:0016023 ;GO:0055085 ;GO:0055085 ;GO:0016021 ;GO:0016021 ;GO:0016023 ;GO:0055085 ;GO:0016021 ;GO:0016023 ;GO:0055085 ;GO:0016021 ;GO:0016023 ;GO:0055085 ;GO:0046872 ;GO:0016491 ;GO:0016023 ;GO:0016021 ;GO:0016023 ;GO:0055085 ;GO:0016021 ;GO:0016023 ;GO:…	CYP734A	CYP734
Zoff285553	D	2682	68	59	78	24	50	24	49	106	91	174	18	28	3.35	3.39	3.87	1.22	2.59	1.19	2.41	5.31	4.49	8.8	0.89	1.41	3.53667	1.66667	4.07	3.7	gi|672185696|ref|XP_008812889.1|	PREDICTED: isoflavone 2'-hydroxylase-like [Phoenix dactylifera]	vvi:100267741	hypothetical protein LOC100267741	At4g37330	[Q] KOG0156 Cytochrome P450 CYP2 subfamily	sp|P93147|C81E1_GLYEC	Isoflavone 2'-hydroxylase OS=Glycyrrhiza echinata GN=CYP81E1 PE=1 SV=2	GO:0016491 ;GO:0016491 ;GO:0046872 ;GO:0016491	CYP81E	CYP81
Zoff288348	A	2053	414	238.63	366.9	303.43	334.73	425.72	484	446.58	477	401	512.43	342	20.38	13.71	18.2	15.39	17.31	21.05	23.82	22.38	23.55	20.28	25.38	17.22	17.43	17.9167	23.25	20.96	gi|695048304|ref|XP_009412059.1|	PREDICTED: cytochrome P450 97B2, chloroplastic isoform X1 [Musa acuminata subsp. malaccensis]	vvi:100248381	similar to Cytochrome P450 97B2	At4g15110	[QI] KOG0157 Cytochrome P450 CYP4/CYP19/CYP26 subfamilies	sp|Q43078|C97B1_PEA	Cytochrome P450 97B1, chloroplastic OS=Pisum sativum GN=CYP97B1 PE=2 SV=1	GO:0055114 ;GO:0019288 ;GO:0016117 ;GO:0016705 ;GO:0009055 ;GO:0004497 ;GO:0009570 ;GO:0020037 ;GO:0031969 ;GO:0005506 ;GO:0055114 ;GO:0019288 ;GO:0016117 ;GO:0016705 ;GO:0009055 ;GO:0004497 ;GO:0009570 ;GO:0020037 ;GO:0031969 ;GO:0005506 ;GO:0055114 ;GO:0019288 ;GO:0016117 ;GO:0016705 ;GO:0009055 ;GO:0004497 ;GO:0009570 ;GO:0020037 ;GO:0031969 ;GO:0005506 ;GO:0055114 ;GO:0019288 ;GO:0016117 ;GO:…	CYP97B	CYP97
Zoff289441	B	342	5	2	3	4	4	6	2	14	1	5	3	5	0.25	0.11	0.15	0.2	0.21	0.3	0.1	0.7	0.05	0.25	0.15	0.25	0.17	0.236667	0.283333	0.216667	gi|695026343|ref|XP_009400465.1|	PREDICTED: cytochrome P450 704C1-like [Musa acuminata subsp. malaccensis]	rcu:RCOM_1612550	cytochrome P450, putative (EC:1.14.14.1)	At2g44890	[QI] KOG0157 Cytochrome P450 CYP4/CYP19/CYP26 subfamilies	sp|Q50EK3|C04C1_PINTA	Cytochrome P450 704C1 OS=Pinus taeda GN=CYP704C1 PE=2 SV=1	GO:0020037 ;GO:0016705 ;GO:0005506 ;GO:0004497 ;GO:0055114	CYP704C	CYP704
Zoff289442	B	1156	467	304	396	979	696	711	539	554	447	1004	531	646	22.98	17.46	19.65	49.66	35.99	35.15	26.52	27.76	22.06	50.77	26.3	32.53	20.03	40.2667	25.4467	36.5333	gi|695026343|ref|XP_009400465.1|	PREDICTED: cytochrome P450 704C1-like [Musa acuminata subsp. malaccensis]	osa:4349165	Os10g0525000	At2g45510	[QI] KOG0157 Cytochrome P450 CYP4/CYP19/CYP26 subfamilies	sp|Q50EK3|C04C1_PINTA	Cytochrome P450 704C1 OS=Pinus taeda GN=CYP704C1 PE=2 SV=1	GO:0046872 ;GO:0016491 ;GO:0009536 ;GO:0022900 ;GO:0046872 ;GO:0004497 ;GO:0016705 ;GO:0009536 ;GO:0022900 ;GO:0046872 ;GO:0016491 ;GO:0009536 ;GO:0022900	CYP704C	CYP704
Zoff289447	B	1261	399	251	325	311	296	254	348	288	430	362	459	298	19.64	14.42	16.13	15.78	15.31	12.56	17.13	14.43	21.23	18.31	22.73	15.01	16.73	14.55	17.5967	18.6833	gi|695026343|ref|XP_009400465.1|	PREDICTED: cytochrome P450 704C1-like [Musa acuminata subsp. malaccensis]	osa:4349165	Os10g0525000	At2g45510	[QI] KOG0157 Cytochrome P450 CYP4/CYP19/CYP26 subfamilies	sp|Q50EK3|C04C1_PINTA	Cytochrome P450 704C1 OS=Pinus taeda GN=CYP704C1 PE=2 SV=1	GO:0046872 ;GO:0016491 ;GO:0009536 ;GO:0022900	CYP704C	CYP704
Zoff290494	A	2829	740	591	960	101	417	211	266	383	223	530	383	298	36.42	33.95	47.63	5.12	21.56	10.43	13.09	19.19	11.01	26.8	18.97	15.01	39.3333	12.37	14.43	20.26	gi|695004257|ref|XP_009388531.1|	PREDICTED: cytochrome P450 734A6-like [Musa acuminata subsp. malaccensis]	zma:100382270	hypothetical protein LOC100382270	At2g26710	[QI] KOG0157 Cytochrome P450 CYP4/CYP19/CYP26 subfamilies	sp|B9X287|C7346_ORYSJ	Cytochrome P450 734A6 OS=Oryza sativa subsp. japonica GN=CYP734A6 PE=2 SV=1	GO:0010268 ;GO:0016131 ;GO:0004497 ;GO:0005506 ;GO:0020037 ;GO:0016705 ;GO:0016021 ;GO:0040008 ;GO:0055114 ;GO:0010268 ;GO:0016131 ;GO:0004497 ;GO:0005506 ;GO:0020037 ;GO:0016705 ;GO:0016021 ;GO:0040008 ;GO:0055114 ;GO:0010268 ;GO:0016131 ;GO:0009055 ;GO:0005506 ;GO:0009741 ;GO:0020037 ;GO:0016705 ;GO:0016021 ;GO:0008395 ;GO:0019825 ;GO:0009733 ;GO:0040008 ;GO:0009416 ;GO:0055114 ;GO:0050616 ;GO:…	CYP734A	CYP734
Zoff291612	D	771	381.74	331.33	51.83	41	44.07	123.41	297.97	583.43	592.44	75.33	152.41	145.92	18.79	19.03	2.57	2.08	2.28	6.1	14.66	29.23	29.24	3.81	7.55	7.35	13.4633	3.48667	24.3767	6.23667	gi|403399730|sp|E3W9C4.1|C71A1_ZINZE	RecName: Full=Alpha-humulene 10-hydroxylase [Zingiber zerumbet]	osa:4342734	Os07g0218700	At3g26330	[Q] KOG0156 Cytochrome P450 CYP2 subfamily	sp|E3W9C4|C71A1_ZINZE	Alpha-humulene 10-hydroxylase OS=Zingiber zerumbet GN=CYP71BA1 PE=1 SV=1	GO:0046872 ;GO:0016491 ;GO:0016023	CYP71B	CYP71
Zoff291616	D	1849	934.26	752.67	1247.17	4649	1442.93	316.59	917.03	1505.57	1352.56	2897.67	456.59	1203.08	45.98	43.23	61.88	235.83	74.62	15.65	45.13	75.44	66.76	146.53	22.61	60.59	50.3633	108.7	62.4433	76.5767	gi|403399730|sp|E3W9C4.1|C71A1_ZINZE	RecName: Full=Alpha-humulene 10-hydroxylase [Zingiber zerumbet]	vvi:100254557	hypothetical protein LOC100254557	At5g25120	[Q] KOG0156 Cytochrome P450 CYP2 subfamily	sp|E3W9C4|C71A1_ZINZE	Alpha-humulene 10-hydroxylase OS=Zingiber zerumbet GN=CYP71BA1 PE=1 SV=1	GO:0016491 ;GO:0005488 ;GO:0016491 ;GO:0005488 ;GO:0005488 ;GO:0016491 ;GO:0016020 ;GO:0005488 ;GO:0016491 ;GO:0016020 ;GO:0044550 ;GO:0046872 ;GO:0098542 ;GO:0016020 ;GO:0016102 ;GO:0036201 ;GO:0055114 ;GO:0044550 ;GO:0005506 ;GO:0020037 ;GO:0098542 ;GO:0016021 ;GO:0016102 ;GO:0036201 ;GO:0055114	CYP71B	CYP71
Zoff292337	A	2116	125	121	38	87	139	88	56	95	56	97	161	86	6.15	6.95	1.89	4.41	7.19	4.35	2.76	4.76	2.76	4.91	7.97	4.33	4.99667	5.31667	3.42667	5.73667	gi|695068464|ref|XP_009381177.1|	PREDICTED: cytochrome P450 90D2-like isoform X1 [Musa acuminata subsp. malaccensis]	sbi:SORBI_03g002870	hypothetical protein	At3g13730	[QI] KOG0157 Cytochrome P450 CYP4/CYP19/CYP26 subfamilies	sp|Q94IW5|C90D2_ORYSJ	Cytochrome P450 90D2 OS=Oryza sativa subsp. japonica GN=CYP90D2 PE=1 SV=1	GO:0016132 ;GO:0016021 ;GO:0055114 ;GO:0009055 ;GO:0048441 ;GO:0048443 ;GO:0048366 ;GO:0020037 ;GO:0016709 ;GO:0005789 ;GO:0005506 ;GO:0016132 ;GO:0016021 ;GO:0055114 ;GO:0009055 ;GO:0048441 ;GO:0048443 ;GO:0048366 ;GO:0020037 ;GO:0016709 ;GO:0005789 ;GO:0005506 ;GO:0016132 ;GO:0016021 ;GO:0055114 ;GO:0009055 ;GO:0048441 ;GO:0048443 ;GO:0048366 ;GO:0020037 ;GO:0016709 ;GO:0005789 ;GO:0005506 ;GO:…	CYP90D	CYP90
Zoff292338	A	2350	287	252	229	138	215	199	248	423	332	228	309	252	14.13	14.47	11.36	7	11.12	9.84	12.2	21.19	16.39	11.53	15.3	12.69	13.32	9.32	16.5933	13.1733	gi|695068468|ref|XP_009381179.1|	PREDICTED: cytochrome P450 90D2-like isoform X3 [Musa acuminata subsp. malaccensis]	sbi:SORBI_03g002870	hypothetical protein	At3g13730	[QI] KOG0157 Cytochrome P450 CYP4/CYP19/CYP26 subfamilies	sp|Q94IW5|C90D2_ORYSJ	Cytochrome P450 90D2 OS=Oryza sativa subsp. japonica GN=CYP90D2 PE=1 SV=1	GO:0016132 ;GO:0016021 ;GO:0055114 ;GO:0009055 ;GO:0048441 ;GO:0048443 ;GO:0048366 ;GO:0020037 ;GO:0016709 ;GO:0005789 ;GO:0005506 ;GO:0016132 ;GO:0016021 ;GO:0022900 ;GO:0009055 ;GO:0048441 ;GO:0048443 ;GO:0048366 ;GO:0020037 ;GO:0016709 ;GO:0005789 ;GO:0005506	CYP90D	CYP90
Zoff292339	D	897	36	42	37	11	26	24	42	62	54	33	57	37	1.77	2.41	1.84	0.56	1.34	1.19	2.07	3.11	2.67	1.67	2.82	1.86	2.00667	1.03	2.61667	2.11667	gi|695042525|ref|XP_009408921.1|	PREDICTED: cytochrome P450 90D2-like [Musa acuminata subsp. malaccensis]	osa:4327329	Os01g0197100; K09589 cytochrome P450, family 90, subfamily D, polypeptide 2 (steroid 3-oxidase) [EC:1.14.-.-]	At3g13730	[QI] KOG0157 Cytochrome P450 CYP4/CYP19/CYP26 subfamilies	sp|Q94IW5|C90D2_ORYSJ	Cytochrome P450 90D2 OS=Oryza sativa subsp. japonica GN=CYP90D2 PE=1 SV=1	GO:0016132 ;GO:0004497 ;GO:0005506 ;GO:0020037 ;GO:0016705 ;GO:0016021 ;GO:0022900	CYP90D	CYP90
Zoff292979	D	2881	2552.96	2202.34	2536.04	580.99	1179.99	457	1844.8	1850.96	2737.47	1549.62	1692.91	2527.78	125.65	126.5	125.83	29.47	61.02	22.59	90.78	92.74	135.13	78.36	83.84	127.3	125.993	37.6933	106.217	96.5	gi|694999984|ref|XP_009409655.1|	PREDICTED: cytochrome P450 71A1-like [Musa acuminata subsp. malaccensis]	pop:POPTR_776174	hypothetical protein	At3g26310	[Q] KOG0156 Cytochrome P450 CYP2 subfamily	sp|P24465|C71A1_PERAE	Cytochrome P450 71A1 OS=Persea americana GN=CYP71A1 PE=1 SV=2	GO:0046872 ;GO:0044699 ;GO:0016491 ;GO:0031090 ;GO:0005783 ;GO:0044425	CYP71A	CYP71
Zoff294948	B	1809	4443	4720	3505	3532	4367	2480	16482	28759	33969	4895	5181	3697	218.67	271.11	173.91	179.17	225.83	122.61	811.1	1440.96	1676.77	247.54	256.6	186.18	221.23	175.87	1309.61	230.107	gi|695027919|ref|XP_009401319.1|	PREDICTED: cytochrome P450 71A1-like [Musa acuminata subsp. malaccensis]	osa:4347176	Os09g0441400	At5g07990	[Q] KOG0156 Cytochrome P450 CYP2 subfamily	sp|Q9SD85|F3PH_ARATH	Flavonoid 3'-monooxygenase OS=Arabidopsis thaliana GN=CYP75B1 PE=1 SV=1	GO:0020037 ;GO:0016705 ;GO:0004497 ;GO:0005506 ;GO:0055114 ;GO:0020037 ;GO:0016705 ;GO:0004497 ;GO:0005506 ;GO:0055114 ;GO:0020037 ;GO:0016705 ;GO:0004497 ;GO:0005506 ;GO:0055114 ;GO:0020037 ;GO:0016705 ;GO:0004497 ;GO:0005506 ;GO:0055114	CYP75B	CYP75
Zoff294951	B	3278	8107	7049	4915	2532	5442	1764	4625	4768	3781.63	5027	7168	5721	399.01	404.89	243.87	128.44	281.42	87.21	227.6	238.9	186.67	254.21	355.01	288.11	349.257	165.69	217.723	299.11	gi|695035702|ref|XP_009405275.1|	PREDICTED: cytochrome P450 71A1-like [Musa acuminata subsp. malaccensis]	pop:POPTR_75918	CYP71D41; cytochrome P450	At4g13290	[Q] KOG0156 Cytochrome P450 CYP2 subfamily	sp|A6YIH8|C7D55_HYOMU	Premnaspirodiene oxygenase OS=Hyoscyamus muticus GN=CYP71D55 PE=1 SV=1	GO:0006355 ;GO:0003700 ;GO:0003676 ;GO:0042254 ;GO:0008270 ;GO:0016705 ;GO:0004497 ;GO:0005488 ;GO:0016491 ;GO:0005488 ;GO:0016491 ;GO:0005488 ;GO:0016491 ;GO:0005488	CYP71D	CYP71
Zoff295921	B	2092	269	229	257	310	481	311	247	190	203	194	531	247	13.24	13.15	12.75	15.73	24.87	15.38	12.16	9.52	10.02	9.81	26.3	12.44	13.0467	18.66	10.5667	16.1833	gi|695066409|ref|XP_009380096.1|	PREDICTED: isoflavone 2'-hydroxylase-like [Musa acuminata subsp. malaccensis]	vvi:100267741	hypothetical protein LOC100267741	At4g37330	[Q] KOG0156 Cytochrome P450 CYP2 subfamily	sp|Q6WNQ8|C81E8_MEDTR	Cytochrome P450 81E8 OS=Medicago truncatula GN=CYP81E8 PE=2 SV=1	GO:0016491 ;GO:0005488 ;GO:0046872 ;GO:0016491 ;GO:0016491 ;GO:0005488 ;GO:0016491 ;GO:0005488 ;GO:0020037 ;GO:0016705 ;GO:0004497 ;GO:0005506 ;GO:0055114 ;GO:0046872 ;GO:0016491 ;GO:0016491 ;GO:0005488	CYP81E	CYP81
Zoff295923	B	1563	263	204	251	536	935	457	290	201	370	649	373	300	12.94	11.72	12.45	27.19	48.35	22.59	14.27	10.07	18.26	32.82	18.47	15.11	12.37	32.71	14.2	22.1333	gi|695066409|ref|XP_009380096.1|	PREDICTED: isoflavone 2'-hydroxylase-like [Musa acuminata subsp. malaccensis]	vvi:100267741	hypothetical protein LOC100267741	At5g67310	[Q] KOG0156 Cytochrome P450 CYP2 subfamily	sp|Q6WNQ8|C81E8_MEDTR	Cytochrome P450 81E8 OS=Medicago truncatula GN=CYP81E8 PE=2 SV=1	GO:0016491 ;GO:0005488 ;GO:0046872 ;GO:0016491 ;GO:0020037 ;GO:0016705 ;GO:0004497 ;GO:0005506 ;GO:0055114	CYP81E	CYP81
Zoff297089	A	1915	2426	2760	3527	790	1517	579	899	839	1459	338	632	690	119.4	158.53	175	40.08	78.45	28.62	44.24	42.04	72.02	17.09	31.3	34.75	150.977	49.05	52.7667	27.7133	gi|672170598|ref|XP_008805359.1|	PREDICTED: cytochrome P450 734A6-like [Phoenix dactylifera]	osa:4344024	Os07g0635500	At2g46950	[QI] KOG0157 Cytochrome P450 CYP4/CYP19/CYP26 subfamilies	sp|B9X287|C7346_ORYSJ	Cytochrome P450 734A6 OS=Oryza sativa subsp. japonica GN=CYP734A6 PE=2 SV=1	GO:0046872 ;GO:0016491	CYP734A	CYP734
Zoff298191	B	565	270	194	177	856	585	609	229	277	292	402	207	294	13.29	11.14	8.78	43.42	30.25	30.11	11.27	13.88	14.41	20.33	10.25	14.81	11.07	34.5933	13.1867	15.13	gi|641819670|gb|KDO39891.1|	hypothetical protein CISIN_1g013651mg [Citrus sinensis]	vvi:100260935	hypothetical protein LOC100260935	At3g26230	[Q] KOG0156 Cytochrome P450 CYP2 subfamily	sp|P24465|C71A1_PERAE	Cytochrome P450 71A1 OS=Persea americana GN=CYP71A1 PE=1 SV=2	GO:0046872 ;GO:0016491 ;GO:0046872 ;GO:0016491 ;GO:0046872 ;GO:0016491 ;GO:0046872 ;GO:0016491 ;GO:0046872 ;GO:0016491	CYP71A	CYP71
Zoff298193	C	1455	1570.31	961.65	1115.46	3164.4	2471.89	2374.65	1333	1564.23	1808.53	2353.21	1150.06	1596.51	77.29	55.24	55.35	160.52	127.83	117.4	65.6	78.38	89.27	119	56.96	80.4	62.6267	135.25	77.75	85.4533	gi|672139923|ref|XP_008793763.1|	PREDICTED: cytochrome P450 71A9-like [Phoenix dactylifera]	rcu:RCOM_0785740	cytochrome P450, putative (EC:1.14.13.68)	At1g13080	[Q] KOG0156 Cytochrome P450 CYP2 subfamily	sp|O81970|C71A9_SOYBN	Cytochrome P450 71A9 OS=Glycine max GN=CYP71A9 PE=2 SV=1	GO:0046872 ;GO:0016491 ;GO:0046872 ;GO:0016491 ;GO:0046872 ;GO:0016491 ;GO:0046872 ;GO:0016491	CYP71A	CYP71
Zoff298195	C	700	40.16	13.46	36.9	577.56	332.72	358.33	112.82	16.51	58.71	257.78	145.96	175.14	1.98	0.77	1.83	29.3	17.21	17.72	5.55	0.83	2.9	13.04	7.23	8.82	1.52667	21.41	3.09333	9.69667	gi|695059365|ref|XP_009418039.1|	PREDICTED: cytochrome P450 71A9-like [Musa acuminata subsp. malaccensis]	rcu:RCOM_0794410	cytochrome P450, putative (EC:1.14.13.68)	At5g42590	[Q] KOG0156 Cytochrome P450 CYP2 subfamily	sp|O81970|C71A9_SOYBN	Cytochrome P450 71A9 OS=Glycine max GN=CYP71A9 PE=2 SV=1	GO:0016020 ;GO:0046872 ;GO:0016491	CYP71A	CYP71
Zoff299121	A	4714	85	78	79	40	56	58	97	44	82	44	53	36	4.18	4.48	3.92	2.03	2.9	2.87	4.77	2.2	4.05	2.23	2.62	1.81	4.19333	2.6	3.67333	2.22	gi|695004257|ref|XP_009388531.1|	PREDICTED: cytochrome P450 734A6-like [Musa acuminata subsp. malaccensis]	sbi:SORBI_03g004210	hypothetical protein	At2g26710	[QI] KOG0157 Cytochrome P450 CYP4/CYP19/CYP26 subfamilies	sp|B9X287|C7346_ORYSJ	Cytochrome P450 734A6 OS=Oryza sativa subsp. japonica GN=CYP734A6 PE=2 SV=1	GO:0010268 ;GO:0050896 ;GO:0016131 ;GO:0004497 ;GO:0005506 ;GO:0020037 ;GO:0016705 ;GO:0016021 ;GO:0040008 ;GO:0055114 ;GO:0046872 ;GO:0010268 ;GO:0016131 ;GO:0004497 ;GO:0016020 ;GO:0046872 ;GO:0010268 ;GO:0016131 ;GO:0004497 ;GO:0016020	CYP734A	CYP734
Zoff300319	B	391	376.66	332.56	445.34	208.09	277.49	151.07	154.42	78.95	169.44	193.24	155.25	162.15	18.54	19.1	22.1	10.56	14.35	7.47	7.6	3.96	8.36	9.77	7.69	8.17	19.9133	10.7933	6.64	8.54333	gi|695013365|ref|XP_009393464.1|	PREDICTED: cytochrome P450 71A1-like [Musa acuminata subsp. malaccensis]	pop:POPTR_806504	hypothetical protein	At4g13310	[Q] KOG0156 Cytochrome P450 CYP2 subfamily	sp|P24465|C71A1_PERAE	Cytochrome P450 71A1 OS=Persea americana GN=CYP71A1 PE=1 SV=2	GO:0046872 ;GO:0016491	CYP71A	CYP71
Zoff300321	B	483	379.84	384.1	571.39	328.61	454.49	239.92	294.2	192.58	315.41	417.72	328	287.92	18.69	22.06	28.35	16.67	23.5	11.86	14.48	9.65	15.57	21.12	16.24	14.5	23.0333	17.3433	13.2333	17.2867	gi|695075728|ref|XP_009385113.1|	PREDICTED: cytochrome P450 71A1-like [Musa acuminata subsp. malaccensis]	pop:POPTR_806504	hypothetical protein	At2g45570	[Q] KOG0156 Cytochrome P450 CYP2 subfamily	sp|P24465|C71A1_PERAE	Cytochrome P450 71A1 OS=Persea americana GN=CYP71A1 PE=1 SV=2	GO:0046872 ;GO:0044699 ;GO:0016491 ;GO:0043231 ;GO:0016020	CYP71A	CYP71
Zoff300324	C	642	791	593	917	583.96	716.8	453.99	523	386	599	695.59	623	539	38.93	34.06	45.5	29.62	37.07	22.44	25.74	19.34	29.57	35.18	30.86	27.14	39.4967	29.71	24.8833	31.06	gi|695012012|ref|XP_009392746.1|	PREDICTED: cytochrome P450 71A3-like [Musa acuminata subsp. malaccensis]	ath:AT3G48290	CYP71A24; electron carrier/ heme binding / iron ion binding / monooxygenase/ oxygen binding	At4g13310	[Q] KOG0156 Cytochrome P450 CYP2 subfamily	sp|Q9STK9|C71AO_ARATH	Cytochrome P450 71A24 OS=Arabidopsis thaliana GN=CYP71A24 PE=2 SV=3	GO:0046872 ;GO:0016491 ;GO:0046872 ;GO:0016491 ;GO:0046872 ;GO:0016491 ;GO:0046872 ;GO:0016491	CYP71A	CYP71
Zoff300326	B	377	95.63	77.89	52.66	43.79	35.12	27.33	52.41	45.36	56.15	80.37	62.99	63.64	4.71	4.47	2.61	2.22	1.82	1.35	2.58	2.27	2.77	4.06	3.12	3.2	3.93	1.79667	2.54	3.46	gi|695013365|ref|XP_009393464.1|	PREDICTED: cytochrome P450 71A1-like [Musa acuminata subsp. malaccensis]	pop:POPTR_806504	hypothetical protein	At4g13310	[Q] KOG0156 Cytochrome P450 CYP2 subfamily	sp|P24465|C71A1_PERAE	Cytochrome P450 71A1 OS=Persea americana GN=CYP71A1 PE=1 SV=2	GO:0046872 ;GO:0016491	CYP71A	CYP71
Zoff300327	C	386	40	30	45	25.04	34.2	16.01	31.78	12	21	38.42	30	30	1.97	1.72	2.23	1.27	1.77	0.79	1.56	0.6	1.04	1.94	1.49	1.51	1.97333	1.27667	1.06667	1.64667	gi|566210266|ref|XP_002323082.2|	hypothetical protein POPTR_0016s14440g [Populus trichocarpa]	ath:AT3G48320	CYP71A21; electron carrier/ heme binding / iron ion binding / monooxygenase/ oxygen binding	At3g26170	[Q] KOG0156 Cytochrome P450 CYP2 subfamily	sp|Q9STL2|C71AL_ARATH	Cytochrome P450 71A21 OS=Arabidopsis thaliana GN=CYP71A21 PE=2 SV=1	GO:0046872 ;GO:0016491 ;GO:0019825	CYP71A	CYP71
Zoff300329	B	483	360.42	275.76	323.07	232.15	295.57	155.53	189.73	226.75	222.07	258.64	229.23	202.67	17.74	15.84	16.03	11.78	15.28	7.69	9.34	11.36	10.96	13.08	11.35	10.21	16.5367	11.5833	10.5533	11.5467	gi|695013365|ref|XP_009393464.1|	PREDICTED: cytochrome P450 71A1-like [Musa acuminata subsp. malaccensis]	vvi:100253593	hypothetical protein LOC100253593	At3g26230	[Q] KOG0156 Cytochrome P450 CYP2 subfamily	sp|P24465|C71A1_PERAE	Cytochrome P450 71A1 OS=Persea americana GN=CYP71A1 PE=1 SV=2	GO:0046872 ;GO:0044699 ;GO:0016491 ;GO:0031090 ;GO:0005783 ;GO:0044425	CYP71A	CYP71
Zoff300334	B	454	322.11	269.3	360.29	171.92	267.2	123.77	154.51	94.9	137.78	172.15	180.59	125.44	15.85	15.47	17.88	8.72	13.82	6.12	7.6	4.75	6.8	8.71	8.94	6.32	16.4	9.55333	6.38333	7.99	gi|695013365|ref|XP_009393464.1|	PREDICTED: cytochrome P450 71A1-like [Musa acuminata subsp. malaccensis]	osa:4338845	Os05g0424300	At2g30770	[Q] KOG0156 Cytochrome P450 CYP2 subfamily	sp|Q43257|C71C4_MAIZE	indole-2-monooxygenase OS=Zea mays GN=CYP71C4 PE=1 SV=1	--	CYP71C	CYP71
Zoff300336	B	454	67.44	78.47	108.96	43	94.05	37.82	60.38	34.64	65.31	72.93	73.46	73.85	3.32	4.51	5.41	2.18	4.86	1.87	2.97	1.74	3.22	3.69	3.64	3.72	4.41333	2.97	2.64333	3.68333	gi|695013365|ref|XP_009393464.1|	PREDICTED: cytochrome P450 71A1-like [Musa acuminata subsp. malaccensis]	osa:4338845	Os05g0424300	At2g30770	[Q] KOG0156 Cytochrome P450 CYP2 subfamily	sp|Q43257|C71C4_MAIZE	indole-2-monooxygenase OS=Zea mays GN=CYP71C4 PE=1 SV=1	--	CYP71C	CYP71
Zoff300345	D	880	5622.18	3805.55	4115.25	2024.56	1249.97	1643.56	1805.25	3759.05	2439.5	2754.14	3300.58	4735.18	276.71	218.59	204.19	102.7	64.64	81.25	88.84	188.35	120.42	139.27	163.47	238.46	233.163	82.8633	132.537	180.4	gi|695012499|ref|XP_009393009.1|	PREDICTED: allene oxide synthase 2-like [Musa acuminata subsp. malaccensis]	sbi:SORBI_01g042270	hypothetical protein	7303501	[Q] KOG0158 Cytochrome P450 CYP3/CYP5/CYP6/CYP9 subfamilies	sp|Q96242|CP74A_ARATH	Allene oxide synthase, chloroplastic OS=Arabidopsis thaliana GN=CYP74A PE=1 SV=3	GO:0020037 ;GO:0016705 ;GO:0005506 ;GO:0055114 ;GO:0020037 ;GO:0016705 ;GO:0005506 ;GO:0055114 ;GO:0047987 ;GO:0020037 ;GO:0016705 ;GO:0004497 ;GO:0005506 ;GO:0055114 ;GO:0047987 ;GO:0020037 ;GO:0016705 ;GO:0004497 ;GO:0005506 ;GO:0055114 ;GO:0020037 ;GO:0016705 ;GO:0005506 ;GO:0055114 ;GO:0009108 ;GO:0008652 ;GO:0009695 ;GO:0009697 ;GO:0016705 ;GO:0005506 ;GO:0010363 ;GO:0019761 ;GO:0010200 ;GO:…	CYP74A	CYP74
Zoff300346	D	386	83.16	105.45	197.06	2.44	3.03	1.13	53.75	194.73	90.5	59.86	108.12	120.47	4.09	6.06	9.78	0.12	0.16	0.06	2.65	9.76	4.47	3.03	5.35	6.07	6.64333	0.113333	5.62667	4.81667	gi|695048782|ref|XP_009412306.1|	PREDICTED: allene oxide synthase 2-like [Musa acuminata subsp. malaccensis]	sbi:SORBI_01g042270	hypothetical protein	7303501	[Q] KOG0158 Cytochrome P450 CYP3/CYP5/CYP6/CYP9 subfamilies	sp|Q96242|CP74A_ARATH	Allene oxide synthase, chloroplastic OS=Arabidopsis thaliana GN=CYP74A PE=1 SV=3	GO:0009108 ;GO:0008652 ;GO:0009695 ;GO:0009697 ;GO:0016705 ;GO:0005506 ;GO:0010363 ;GO:0019761 ;GO:0010200 ;GO:0009684 ;GO:0047987 ;GO:0031348 ;GO:0050832 ;GO:0031408 ;GO:0019373 ;GO:0020037 ;GO:0009867 ;GO:0019288 ;GO:0009941 ;GO:0009595 ;GO:0042742 ;GO:0009416 ;GO:0006612 ;GO:0006569 ;GO:0009117 ;GO:0006636 ;GO:0010310 ;GO:0010287 ;GO:0005739 ;GO:0055114 ;GO:0009862 ;GO:0006766 ;GO:0006733 ;GO:…	CYP74A	CYP74
Zoff300469	D	1757	343	271	457	3053	906	2649	1751	801	979	1291	536	735	16.88	15.57	22.68	154.87	46.85	130.96	86.17	40.13	48.33	65.28	26.55	37.01	18.3767	110.893	58.21	42.9467	gi|694999984|ref|XP_009409655.1|	PREDICTED: cytochrome P450 71A1-like [Musa acuminata subsp. malaccensis]	vvi:100253593	hypothetical protein LOC100253593	At4g13310	[Q] KOG0156 Cytochrome P450 CYP2 subfamily	sp|P24465|C71A1_PERAE	Cytochrome P450 71A1 OS=Persea americana GN=CYP71A1 PE=1 SV=2	GO:0005488 ;GO:0016491 ;GO:0043231 ;GO:0016020 ;GO:0016491 ;GO:0005488 ;GO:0016491 ;GO:0005488	CYP71A	CYP71
Zoff300470	D	730	97	62	110	3	2	8	117	434	74	57	134	21	4.77	3.56	5.46	0.15	0.1	0.4	5.76	21.75	3.65	2.88	6.64	1.06	4.59667	0.216667	10.3867	3.52667	gi|694999984|ref|XP_009409655.1|	PREDICTED: cytochrome P450 71A1-like [Musa acuminata subsp. malaccensis]	sbi:SORBI_03g001060	hypothetical protein	At5g25120	[Q] KOG0156 Cytochrome P450 CYP2 subfamily	sp|O81974|C71D8_SOYBN	Cytochrome P450 71D8 OS=Glycine max GN=CYP71D8 PE=2 SV=1	GO:0046872 ;GO:0016491	CYP71D	CYP71
Zoff302378	A	969	29	24	16	140	38	94	20	53	47	79	38	44	1.43	1.38	0.79	7.1	1.97	4.65	0.98	2.66	2.32	3.99	1.88	2.22	1.2	4.57333	1.98667	2.69667	gi|672124557|ref|XP_008785666.1|	PREDICTED: cytochrome P450 90B1-like [Phoenix dactylifera]	osa:4332134	Os03g0227700; K09587 cytochrome P450, family 90, subfamily B, polypeptide 1 (steroid 22-alpha-hydroxylase) [EC:1.14.13.-]	At3g50660	[QI] KOG0157 Cytochrome P450 CYP4/CYP19/CYP26 subfamilies	sp|O64989|C90B1_ARATH	Cytochrome P450 90B1 OS=Arabidopsis thaliana GN=CYP90B1 PE=1 SV=2	GO:0016132 ;GO:0010012 ;GO:0016021 ;GO:0055114 ;GO:0009867 ;GO:0010358 ;GO:0016705 ;GO:0009055 ;GO:0016023 ;GO:0020037 ;GO:0009826 ;GO:0005506 ;GO:0005783 ;GO:0016126 ;GO:0016132 ;GO:0010012 ;GO:0016021 ;GO:0055114 ;GO:0009867 ;GO:0010358 ;GO:0016705 ;GO:0009055 ;GO:0016023 ;GO:0020037 ;GO:0009826 ;GO:0005506 ;GO:0005783 ;GO:0016126	CYP90B	CYP90
Zoff304813	C	2264	0	0	0	0	0	0	82	0	46.42	0	0	0	0	0	0	0	0	0	4.04	0	2.29	0	0	0	0	0	2.11	0	gi|471881746|emb|CCO34427.1|	NADPH-ferrihemoprotein reductase [Rhizoctonia solani AG-1 IB]	cci:CC1G_15012	cytochrome P450 oxidoreductase; K00327 NADPH-ferrihemoprotein reductase [EC:1.6.2.4]	7297099	[C] KOG1158 NADP/FAD dependent oxidoreductase	sp|Q9HDG2|NCPR_PHACH	NADPH--cytochrome P450 reductase OS=Phanerochaete chrysosporium GN=CPR PE=2 SV=1	GO:0003958 ;GO:0005506 ;GO:0010181 ;GO:0055085 ;GO:0016021 ;GO:0055114 ;GO:0003958 ;GO:0005506 ;GO:0010181 ;GO:0055085 ;GO:0016021 ;GO:0055114 ;GO:0003958 ;GO:0005506 ;GO:0010181 ;GO:0055085 ;GO:0016021 ;GO:0055114	CYP	CYP
Zoff304815	C	445	0	0	0	0	0	0	0	0	1.58	0	0	0	0	0	0	0	0	0	0	0	0.08	0	0	0	0	0	0.0266667	0	gi|443915610|gb|ELU36991.1|	cytochrome P450 oxidoreductase [Rhizoctonia solani AG-1 IA]	mpr:MPER_02624	hypothetical protein ; K00327 NADPH-ferrihemoprotein reductase [EC:1.6.2.4]	Hs22049499	[C] KOG1158 NADP/FAD dependent oxidoreductase	sp|Q9HDG2|NCPR_PHACH	NADPH--cytochrome P450 reductase OS=Phanerochaete chrysosporium GN=CPR PE=2 SV=1	GO:0005506 ;GO:0003958 ;GO:0055114 ;GO:0010181	CYP	CYP
Zoff304816	C	2368	293	45	80	8	4	10	1	1	0	0	2	12	14.42	2.58	3.97	0.41	0.21	0.49	0.05	0.05	0	0	0.1	0.6	6.99	0.37	0.0333333	0.233333	gi|471881746|emb|CCO34427.1|	NADPH-ferrihemoprotein reductase [Rhizoctonia solani AG-1 IB]	cci:CC1G_15012	cytochrome P450 oxidoreductase; K00327 NADPH-ferrihemoprotein reductase [EC:1.6.2.4]	7297099	[C] KOG1158 NADP/FAD dependent oxidoreductase	sp|Q9HDG2|NCPR_PHACH	NADPH--cytochrome P450 reductase OS=Phanerochaete chrysosporium GN=CPR PE=2 SV=1	GO:0003958 ;GO:0005506 ;GO:0010181 ;GO:0055085 ;GO:0016021 ;GO:0055114 ;GO:0003958 ;GO:0005506 ;GO:0010181 ;GO:0055085 ;GO:0016021 ;GO:0055114	CYP	CYP
Zoff305282	B	530	47.36	5.15	12.04	28.48	17.93	33.17	19.65	29.23	13.49	4.99	10.74	20.73	2.33	0.3	0.6	1.44	0.93	1.64	0.97	1.46	0.67	0.25	0.53	1.04	1.07667	1.33667	1.03333	0.606667	gi|703114726|ref|XP_010100729.1|	Flavonoid 3'-monooxygenase [Morus notabilis]	zma:100282873	pco115177; LOC100282873	At1g01280	[Q] KOG0156 Cytochrome P450 CYP2 subfamily	sp|Q9LNJ4|C70A2_ARATH	Cytochrome P450 703A2 OS=Arabidopsis thaliana GN=CYP703A2 PE=2 SV=1	GO:0046872 ;GO:0051791 ;GO:0044249 ;GO:0010584 ;GO:0016709	CYP703A	CYP703
Zoff305284	B	530	7.11	6.37	0	53.59	42.55	45.64	15.7	7.16	2.69	11.32	5.61	31.41	0.35	0.37	0	2.72	2.2	2.26	0.77	0.36	0.13	0.57	0.28	1.58	0.24	2.39333	0.42	0.81	gi|703114726|ref|XP_010100729.1|	Flavonoid 3'-monooxygenase [Morus notabilis]	zma:100282873	pco115177; LOC100282873	At1g01280	[Q] KOG0156 Cytochrome P450 CYP2 subfamily	sp|Q9LNJ4|C70A2_ARATH	Cytochrome P450 703A2 OS=Arabidopsis thaliana GN=CYP703A2 PE=2 SV=1	GO:0046872 ;GO:0051791 ;GO:0044249 ;GO:0010584 ;GO:0016709	CYP703A	CYP703
Zoff305286	B	921	796.95	507.77	180.28	163.38	642.63	321.78	198.36	1360.38	220.34	57.12	91.74	148.58	39.22	29.17	8.95	8.29	33.23	15.91	9.76	68.16	10.88	2.89	4.54	7.48	25.78	19.1433	29.6	4.97	gi|695052922|ref|XP_009414535.1|	PREDICTED: cytochrome P450 703A2 [Musa acuminata subsp. malaccensis]	osa:4344594	Os08g0131100	At1g01280	[Q] KOG0156 Cytochrome P450 CYP2 subfamily	sp|Q9LNJ4|C70A2_ARATH	Cytochrome P450 703A2 OS=Arabidopsis thaliana GN=CYP703A2 PE=2 SV=1	GO:0010208 ;GO:0044710 ;GO:0046872 ;GO:0016705 ;GO:0004497 ;GO:0044237 ;GO:0010208 ;GO:0005488 ;GO:0044710 ;GO:0016491 ;GO:0044237 ;GO:0046872 ;GO:0051791 ;GO:0044249 ;GO:0010584 ;GO:0016709 ;GO:0044249 ;GO:0051791 ;GO:0046872 ;GO:0010584 ;GO:0016705 ;GO:0004497	CYP703A	CYP703
Zoff305287	B	848	152	105	47.64	419.45	237.07	412.61	146.13	220.17	135	79.01	110.02	164.23	7.48	6.03	2.36	21.28	12.26	20.4	7.19	11.03	6.66	4	5.45	8.27	5.29	17.98	8.29333	5.90667	gi|695052922|ref|XP_009414535.1|	PREDICTED: cytochrome P450 703A2 [Musa acuminata subsp. malaccensis]	osa:4344594	Os08g0131100	At1g01280	[Q] KOG0156 Cytochrome P450 CYP2 subfamily	sp|Q9LNJ4|C70A2_ARATH	Cytochrome P450 703A2 OS=Arabidopsis thaliana GN=CYP703A2 PE=2 SV=1	GO:0046872 ;GO:0051791 ;GO:0044249 ;GO:0004497 ;GO:0010584 ;GO:0016705 ;GO:0044249 ;GO:0051791 ;GO:0046872 ;GO:0010584 ;GO:0016705 ;GO:0004497 ;GO:0044249 ;GO:0051791 ;GO:0046872 ;GO:0010584 ;GO:0016705 ;GO:0004497 ;GO:0046872 ;GO:0051791 ;GO:0044249 ;GO:0010584 ;GO:0016709	CYP703A	CYP703
Zoff305288	B	1314	653.58	572.71	390.04	333.09	419.81	372.8	256.16	859.06	276.48	205.56	343.9	367.05	32.17	32.9	19.35	16.9	21.71	18.43	12.61	43.04	13.65	10.39	17.03	18.48	28.14	19.0133	23.1	15.3	gi|703114726|ref|XP_010100729.1|	Flavonoid 3'-monooxygenase [Morus notabilis]	zma:100282873	pco115177; LOC100282873	At1g01280	[Q] KOG0156 Cytochrome P450 CYP2 subfamily	sp|Q9LNJ4|C70A2_ARATH	Cytochrome P450 703A2 OS=Arabidopsis thaliana GN=CYP703A2 PE=2 SV=1	GO:0046872 ;GO:0051791 ;GO:0044249 ;GO:0010584 ;GO:0016709 ;GO:0046872 ;GO:0051791 ;GO:0044249 ;GO:0010584 ;GO:0016709 ;GO:0046872 ;GO:0051791 ;GO:0044249 ;GO:0010584 ;GO:0016709 ;GO:0046872 ;GO:0051791 ;GO:0044249 ;GO:0010584 ;GO:0016709 ;GO:0046872 ;GO:0051791 ;GO:0044249 ;GO:0010584 ;GO:0016709 ;GO:0055114 ;GO:0005739 ;GO:0080110 ;GO:0009055 ;GO:0051792 ;GO:0020037 ;GO:0016709 ;GO:0005506	CYP703A	CYP703
Zoff305289	C	618	402	249	102	259	417	284	112	800	144	38	74	127	19.79	14.3	5.06	13.14	21.56	14.04	5.51	40.08	7.11	1.92	3.67	6.4	13.05	16.2467	17.5667	3.99667	gi|695052922|ref|XP_009414535.1|	PREDICTED: cytochrome P450 703A2 [Musa acuminata subsp. malaccensis]	osa:4344594	Os08g0131100	At1g01280	[Q] KOG0156 Cytochrome P450 CYP2 subfamily	sp|Q9LNJ4|C70A2_ARATH	Cytochrome P450 703A2 OS=Arabidopsis thaliana GN=CYP703A2 PE=2 SV=1	GO:0046872 ;GO:0016709 ;GO:0019825 ;GO:0051792 ;GO:0080110 ;GO:0046872 ;GO:0016709 ;GO:0019825 ;GO:0051792 ;GO:0080110	CYP703A	CYP703
Zoff309436	A	3150	1281.38	900.69	1022.88	2148	2004.02	2017.76	1469.01	1477.46	1569.84	1829.89	1619.11	1681.65	63.07	51.73	50.75	108.96	103.63	99.75	72.29	74.03	77.49	92.54	80.19	84.69	55.1833	104.113	74.6033	85.8067	gi|695009905|ref|XP_009391604.1|	PREDICTED: cytochrome P450 2A2-like [Musa acuminata subsp. malaccensis]	vvi:100257479	hypothetical protein LOC100257479	At1g13710	[Q] KOG0156 Cytochrome P450 CYP2 subfamily	sp|Q9VGB5|CP135_DROME	Probable cytochrome P450 313a5 OS=Drosophila melanogaster GN=Cyp313a5 PE=1 SV=2	GO:0016491 ;GO:0005488 ;GO:0016491 ;GO:0005488	CYP313A	CYP313
Zoff309923	A	1132	0	0	17	0	0	1	0	0	0	0	0	1	0	0	0.84	0	0	0.05	0	0	0	0	0	0.05	0.28	0.0166667	0	0.0166667	gi|628336200|ref|XP_007745944.1|	hypothetical protein A1O5_07165 [Cladophialophora psammophila CBS 110553]	nfi:NFIA_017390	cytochrome P450, putative	--	--	--	--	GO:0020037 ;GO:0016705 ;GO:0004497 ;GO:0005506 ;GO:0055114	CYP	CYP
Zoff309924	A	649	0	0	0	0	0	0	0	0	0	0	0	2	0	0	0	0	0	0	0	0	0	0	0	0.1	0	0	0	0.0333333	gi|628336200|ref|XP_007745944.1|	hypothetical protein A1O5_07165 [Cladophialophora psammophila CBS 110553]	nfi:NFIA_017390	cytochrome P450, putative	--	--	--	--	GO:0016491 ;GO:0044699 ;GO:0005488	CYP	CYP
Zoff310987	A	2491	184	297	992	124	82	119	125	272	194	103	166	356	9.06	17.06	49.22	6.29	4.24	5.88	6.15	13.63	9.58	5.21	8.22	17.93	25.1133	5.47	9.78667	10.4533	gi|695024614|ref|XP_009399529.1|	PREDICTED: cytochrome P450 724B1-like [Musa acuminata subsp. malaccensis]	osa:4336116	Os04g0469800; K12639 cytochrome P450, family 724, subfamily B, polypeptide 1 [EC:1.14.13.-]	At3g50660	[QI] KOG0157 Cytochrome P450 CYP4/CYP19/CYP26 subfamilies	sp|Q6F4F5|C724B_ORYSJ	Cytochrome P450 724B1 OS=Oryza sativa subsp. japonica GN=CYP724B1 PE=1 SV=1	GO:0016132 ;GO:0008199 ;GO:0010012 ;GO:0016021 ;GO:0055114 ;GO:0009647 ;GO:0016705 ;GO:0009055 ;GO:0006879 ;GO:0016023 ;GO:0006826 ;GO:0020037 ;GO:0016132 ;GO:0046872 ;GO:0009647 ;GO:0004497 ;GO:0016023 ;GO:0016020 ;GO:0016132 ;GO:0046872 ;GO:0009647 ;GO:0004497 ;GO:0016023 ;GO:0020037 ;GO:0016020 ;GO:0016021 ;GO:0008152 ;GO:0016758	CYP724B	CYP724
Zoff310988	A	2981	118	128	305	332	222	244	224	210	204	209	234	280	5.81	7.35	15.13	16.84	11.48	12.06	11.02	10.52	10.07	10.57	11.59	14.1	9.43	13.46	10.5367	12.0867	gi|695024614|ref|XP_009399529.1|	PREDICTED: cytochrome P450 724B1-like [Musa acuminata subsp. malaccensis]	zma:100217085	hypothetical protein LOC100217085; K12639 cytochrome P450, family 724, subfamily B, polypeptide 1 [EC:1.14.13.-]	At5g14400	[QI] KOG0157 Cytochrome P450 CYP4/CYP19/CYP26 subfamilies	sp|Q6F4F5|C724B_ORYSJ	Cytochrome P450 724B1 OS=Oryza sativa subsp. japonica GN=CYP724B1 PE=1 SV=1	GO:0016132 ;GO:0009647 ;GO:0004497 ;GO:0016023 ;GO:0020037 ;GO:0005506 ;GO:0016020 ;GO:0016132 ;GO:0009647 ;GO:0004497 ;GO:0016023 ;GO:0020037 ;GO:0005506 ;GO:0016020 ;GO:0016132 ;GO:0009055 ;GO:0005506 ;GO:0020037 ;GO:0055114 ;GO:0010012 ;GO:0050598 ;GO:0016132 ;GO:0008199 ;GO:0010012 ;GO:0016021 ;GO:0055114 ;GO:0009647 ;GO:0016705 ;GO:0009055 ;GO:0006879 ;GO:0016023 ;GO:0006826 ;GO:0020037 ;GO:…	CYP724B	CYP724
Zoff312190	B	517	305	165	83	66	88	65	98	501	124	43	60	63	15.01	9.48	4.12	3.35	4.55	3.21	4.82	25.1	6.12	2.17	2.97	3.17	9.53667	3.70333	12.0133	2.77	gi|695059104|ref|XP_009417895.1|	PREDICTED: flavonoid 3',5'-hydroxylase 1-like [Musa acuminata subsp. malaccensis]	pop:POPTR_54623	CYP75A12, F3'5'H1; flavonoid 3',5'-hydroxylase (EC:1.14.13.88); K13083 cytochrome P450, family 75, subfamily A (flavonoid 3',5'-hydroxylase) [EC:1.14.13.88]	At5g07990	[Q] KOG0156 Cytochrome P450 CYP2 subfamily	sp|O04773|C75A6_CAMME	Flavonoid 3',5'-hydroxylase OS=Campanula medium GN=CYP75A6 PE=2 SV=1	GO:0016491 ;GO:0005488 ;GO:0016491 ;GO:0005488 ;GO:0016491 ;GO:0005488 ;GO:0016491 ;GO:0005488	CYP75A	CYP75
Zoff312194	D	370	138.57	62.12	21	15	41.71	14	22.05	136.47	31.98	14	14	19.99	6.82	3.57	1.04	0.76	2.16	0.69	1.09	6.84	1.58	0.71	0.69	1.01	3.81	1.20333	3.17	0.803333	gi|695059104|ref|XP_009417895.1|	PREDICTED: flavonoid 3',5'-hydroxylase 1-like [Musa acuminata subsp. malaccensis]	zma:100278079	hypothetical protein LOC100278079	At5g07990	[Q] KOG0156 Cytochrome P450 CYP2 subfamily	sp|P48418|C75A1_PETHY	Flavonoid 3',5'-hydroxylase 1 OS=Petunia hybrida GN=CYP75A1 PE=2 SV=1	GO:0020037 ;GO:0016705 ;GO:0004497 ;GO:0005506 ;GO:0055114	CYP75A	CYP75
Zoff312200	B	410	38.04	24.12	6.39	6.02	10.46	8.01	9.79	72.31	11.21	5	8	8.56	1.87	1.39	0.32	0.31	0.54	0.4	0.48	3.62	0.55	0.25	0.4	0.43	1.19333	0.416667	1.55	0.36	gi|695059104|ref|XP_009417895.1|	PREDICTED: flavonoid 3',5'-hydroxylase 1-like [Musa acuminata subsp. malaccensis]	sbi:SORBI_01g034460	hypothetical protein; K13083 cytochrome P450, family 75, subfamily A (flavonoid 3',5'-hydroxylase) [EC:1.14.13.88]	At5g07990	[Q] KOG0156 Cytochrome P450 CYP2 subfamily	sp|O04790|C75A7_EUSER	Flavonoid 3',5'-hydroxylase OS=Eustoma exaltatum subsp. russellianum GN=CYP75A7 PE=2 SV=1	GO:0046872 ;GO:0016491 ;GO:0009536	CYP75A	CYP75
Zoff312201	B	375	21.91	12.89	14.04	7	9.54	2	11.64	19.42	5.79	7.06	1	11.44	1.08	0.74	0.7	0.36	0.49	0.1	0.57	0.97	0.29	0.36	0.05	0.58	0.84	0.316667	0.61	0.33	gi|695059104|ref|XP_009417895.1|	PREDICTED: flavonoid 3',5'-hydroxylase 1-like [Musa acuminata subsp. malaccensis]	sbi:SORBI_01g034460	hypothetical protein; K13083 cytochrome P450, family 75, subfamily A (flavonoid 3',5'-hydroxylase) [EC:1.14.13.88]	At5g07990	[Q] KOG0156 Cytochrome P450 CYP2 subfamily	sp|O04790|C75A7_EUSER	Flavonoid 3',5'-hydroxylase OS=Eustoma exaltatum subsp. russellianum GN=CYP75A7 PE=2 SV=1	GO:0046872 ;GO:0016491 ;GO:0009536	CYP75A	CYP75
Zoff312209	B	348	7.77	5	2.2	0	3	3	6.68	23.27	0	5	4	4	0.38	0.29	0.11	0	0.16	0.15	0.33	1.17	0	0.25	0.2	0.2	0.26	0.103333	0.5	0.216667	gi|695059104|ref|XP_009417895.1|	PREDICTED: flavonoid 3',5'-hydroxylase 1-like [Musa acuminata subsp. malaccensis]	sbi:SORBI_01g034460	hypothetical protein; K13083 cytochrome P450, family 75, subfamily A (flavonoid 3',5'-hydroxylase) [EC:1.14.13.88]	At5g07990	[Q] KOG0156 Cytochrome P450 CYP2 subfamily	sp|O04790|C75A7_EUSER	Flavonoid 3',5'-hydroxylase OS=Eustoma exaltatum subsp. russellianum GN=CYP75A7 PE=2 SV=1	GO:0016491 ;GO:0005488 ;GO:0009536	CYP75A	CYP75
Zoff312214	D	804	362.47	245	142	94.26	140	68	114	618.51	132.97	60	64	90	17.84	14.07	7.05	4.78	7.24	3.36	5.61	30.99	6.56	3.03	3.17	4.53	12.9867	5.12667	14.3867	3.57667	gi|695059104|ref|XP_009417895.1|	PREDICTED: flavonoid 3',5'-hydroxylase 1-like [Musa acuminata subsp. malaccensis]	zma:100278079	hypothetical protein LOC100278079	At5g07990	[Q] KOG0156 Cytochrome P450 CYP2 subfamily	sp|P48418|C75A1_PETHY	Flavonoid 3',5'-hydroxylase 1 OS=Petunia hybrida GN=CYP75A1 PE=2 SV=1	GO:0009813 ;GO:0046872 ;GO:0004497 ;GO:0016705 ;GO:0044710 ;GO:0005783 ;GO:0044425 ;GO:0009411 ;GO:0046872 ;GO:0016491 ;GO:0046872 ;GO:0016491 ;GO:0046872 ;GO:0016491 ;GO:0046872 ;GO:0016491	CYP75A	CYP75
Zoff314295	B	1329	647	612	829	2080	1399	1305	982	702	1038	1501	1064	1050	31.84	35.15	41.13	105.51	72.35	64.52	48.33	35.17	51.24	75.9	52.7	52.88	36.04	80.7933	44.9133	60.4933	gi|695026341|ref|XP_009400464.1|	PREDICTED: cytochrome P450 704C1-like [Musa acuminata subsp. malaccensis]	pop:POPTR_86546	CYP704A10; cytochrome P450	At2g45510	[QI] KOG0157 Cytochrome P450 CYP4/CYP19/CYP26 subfamilies	sp|Q50EK3|C04C1_PINTA	Cytochrome P450 704C1 OS=Pinus taeda GN=CYP704C1 PE=2 SV=1	GO:0020037 ;GO:0016705 ;GO:0004497 ;GO:0005506 ;GO:0055114 ;GO:0046872 ;GO:0004497 ;GO:0016705 ;GO:0009536 ;GO:0022900 ;GO:0020037 ;GO:0016705 ;GO:0004497 ;GO:0005506 ;GO:0055114 ;GO:0016023 ;GO:0004497 ;GO:0005506 ;GO:0020037 ;GO:0016705 ;GO:0009536 ;GO:0022900 ;GO:0046872 ;GO:0016491 ;GO:0020037 ;GO:0016705 ;GO:0004497 ;GO:0005506 ;GO:0055114	CYP704C	CYP704
Zoff314296	B	384	59	47	55	310	193	187	90	50	113	132	118	136	2.9	2.7	2.73	15.73	9.98	9.24	4.43	2.51	5.58	6.68	5.84	6.85	2.77667	11.65	4.17333	6.45667	gi|695026659|ref|XP_009400636.1|	PREDICTED: cytochrome P450 704C1-like, partial [Musa acuminata subsp. malaccensis]	osa:4349165	Os10g0525000	At2g44890	[QI] KOG0157 Cytochrome P450 CYP4/CYP19/CYP26 subfamilies	sp|Q50EK3|C04C1_PINTA	Cytochrome P450 704C1 OS=Pinus taeda GN=CYP704C1 PE=2 SV=1	GO:0020037 ;GO:0016705 ;GO:0022900 ;GO:0004497 ;GO:0005506	CYP704C	CYP704
Zoff314297	B	672	255	282	299	1493	985	986	494	290	471	731	549	546	12.55	16.2	14.84	75.74	50.94	48.75	24.31	14.53	23.25	36.97	27.19	27.5	14.53	58.4767	20.6967	30.5533	gi|695026659|ref|XP_009400636.1|	PREDICTED: cytochrome P450 704C1-like, partial [Musa acuminata subsp. malaccensis]	vvi:100265146	hypothetical protein LOC100265146	At2g45510	[QI] KOG0157 Cytochrome P450 CYP4/CYP19/CYP26 subfamilies	sp|Q50EK3|C04C1_PINTA	Cytochrome P450 704C1 OS=Pinus taeda GN=CYP704C1 PE=2 SV=1	GO:0020037 ;GO:0016705 ;GO:0004497 ;GO:0005506 ;GO:0055114 ;GO:0020037 ;GO:0016705 ;GO:0004497 ;GO:0005506 ;GO:0055114	CYP704C	CYP704
Zoff314414	C	685	184.85	117	86.61	67.78	119.64	248.64	104.32	174.99	139	79	63	58	9.1	6.72	4.3	3.44	6.19	12.29	5.13	8.77	6.86	3.99	3.12	2.92	6.70667	7.30667	6.92	3.34333	gi|694999984|ref|XP_009409655.1|	PREDICTED: cytochrome P450 71A1-like [Musa acuminata subsp. malaccensis]	pop:POPTR_595711	CYP71D46P-2; cytochrome P450	At2g30750	[Q] KOG0156 Cytochrome P450 CYP2 subfamily	sp|P37118|C71A2_SOLME	Cytochrome P450 71A2 OS=Solanum melongena GN=CYP71A2 PE=2 SV=1	GO:0016020 ;GO:0046872 ;GO:0016491 ;GO:0046872 ;GO:0016491	CYP71A	CYP71
Zoff314419	C	488	4.44	3	0	2.68	5.98	2.65	10.43	19.01	13	5	2	3	0.22	0.17	0	0.14	0.31	0.13	0.51	0.95	0.64	0.25	0.1	0.15	0.13	0.193333	0.7	0.166667	gi|674960848|emb|CDX72308.1|	BnaC07g43300D [Brassica napus]	pop:POPTR_355968	CYP71AN4; cytochrome P450	At5g57260	[Q] KOG0156 Cytochrome P450 CYP2 subfamily	sp|Q9LVD2|C71BA_ARATH	Cytochrome P450 71B10 OS=Arabidopsis thaliana GN=CYP71B10 PE=3 SV=1	GO:0004497 ;GO:0005506 ;GO:0020037 ;GO:0016705 ;GO:0055114	CYP71B	CYP71
Zoff314421	D	1034	586.5	517.55	246	372	404.14	1005.93	342.76	679.67	476.43	247.62	146	124	28.87	29.73	12.21	18.87	20.9	49.73	16.87	34.05	23.52	12.52	7.23	6.24	23.6033	29.8333	24.8133	8.66333	gi|672206054|ref|XP_008779328.1|	PREDICTED: cytochrome P450 71A1-like [Phoenix dactylifera]	vvi:100253593	hypothetical protein LOC100253593	At2g45570	[Q] KOG0156 Cytochrome P450 CYP2 subfamily	sp|P24465|C71A1_PERAE	Cytochrome P450 71A1 OS=Persea americana GN=CYP71A1 PE=1 SV=2	GO:0005488 ;GO:0016491 ;GO:0043231 ;GO:0016020 ;GO:0005488 ;GO:0016491 ;GO:0043231 ;GO:0016020 ;GO:0005488 ;GO:0016491 ;GO:0043231 ;GO:0016020 ;GO:0046872 ;GO:0044699 ;GO:0016491 ;GO:0031090 ;GO:0005783 ;GO:0044425 ;GO:0046872 ;GO:0044699 ;GO:0016491 ;GO:0031090 ;GO:0005783 ;GO:0044425 ;GO:0046872 ;GO:0044699 ;GO:0016491 ;GO:0031090 ;GO:0005783 ;GO:0044425	CYP71A	CYP71
Zoff314423	C	488	9.72	6	6.39	5.54	11.39	6.71	4.25	3	7	11	8	4	0.48	0.34	0.32	0.28	0.59	0.33	0.21	0.15	0.35	0.56	0.4	0.2	0.38	0.4	0.236667	0.386667	gi|567921098|ref|XP_006452555.1|	hypothetical protein CICLE_v10008411mg [Citrus clementina]	pop:POPTR_355968	CYP71AN4; cytochrome P450	At5g57260	[Q] KOG0156 Cytochrome P450 CYP2 subfamily	sp|P37118|C71A2_SOLME	Cytochrome P450 71A2 OS=Solanum melongena GN=CYP71A2 PE=2 SV=1	GO:0020037 ;GO:0016020 ;GO:0016705 ;GO:0004497 ;GO:0005506 ;GO:0055114	CYP71A	CYP71
Zoff318212	C	2207	2550	1849	2771	3775	4721	3992	2773	1313	2738	4054	2653	3388	125.5	106.2	137.49	191.5	244.14	197.36	136.46	65.79	135.15	205.01	131.4	170.62	123.063	211	112.467	169.01	gi|695049172|ref|XP_009412514.1|	PREDICTED: allene oxide synthase 1, chloroplastic-like [Musa acuminata subsp. malaccensis]	sbi:SORBI_01g007000	hypothetical protein; K01723 hydroperoxide dehydratase [EC:4.2.1.92]	At1g74110	[Q] KOG0156 Cytochrome P450 CYP2 subfamily	sp|Q7Y0C8|C74A1_ORYSJ	Allene oxide synthase 1, chloroplastic OS=Oryza sativa subsp. japonica GN=CYP74A1 PE=2 SV=1	GO:0009987 ;GO:0005739 ;GO:0016757 ;GO:0016020 ;GO:0005794 ;GO:0009108 ;GO:0008652 ;GO:0009695 ;GO:0009697 ;GO:0016705 ;GO:0005506 ;GO:0010363 ;GO:0019761 ;GO:0010200 ;GO:0009684 ;GO:0047987 ;GO:0031348 ;GO:0050832 ;GO:0031408 ;GO:0019373 ;GO:0020037 ;GO:0009867 ;GO:0019288 ;GO:0009941 ;GO:0009595 ;GO:0042742 ;GO:0009416 ;GO:0006612 ;GO:0006569 ;GO:0009117 ;GO:0006636 ;GO:0010310 ;GO:0010287 ;GO:…	CYP74A	CYP74
Zoff320814	A	354	156.9	157.87	205.17	533.28	111.32	608.19	242.2	69.94	181.91	496.82	131.8	333.33	7.72	9.07	10.18	27.05	5.76	30.07	11.92	3.5	8.98	25.12	6.53	16.79	8.99	20.96	8.13333	16.1467	gi|695015843|ref|XP_009394812.1|	PREDICTED: cytochrome P450 72A15-like [Musa acuminata subsp. malaccensis]	osa:4326659	Os01g0627800	At3g14680	[QI] KOG0157 Cytochrome P450 CYP4/CYP19/CYP26 subfamilies	sp|Q9LUC6|C7A14_ARATH	Cytochrome P450 72A14 OS=Arabidopsis thaliana GN=CYP72A14 PE=2 SV=1	GO:0020037 ;GO:0016705 ;GO:0004497 ;GO:0005506 ;GO:0005739 ;GO:0055114	CYP72A	CYP72
Zoff320875	A	374	743.95	720.08	1180.1	3268.44	932.65	3508.4	1604.15	403.26	1257.26	3101.08	949.74	1999.82	36.62	41.36	58.55	165.8	48.23	173.45	78.94	20.21	62.06	156.82	47.04	100.71	45.51	129.16	53.7367	101.523	gi|695015843|ref|XP_009394812.1|	PREDICTED: cytochrome P450 72A15-like [Musa acuminata subsp. malaccensis]	vvi:100263459	hypothetical protein LOC100263459	At3g14690	[QI] KOG0157 Cytochrome P450 CYP4/CYP19/CYP26 subfamilies	sp|H2DH21|C7A29_PANGI	Cytochrome P450 CYP72A219 OS=Panax ginseng PE=2 SV=1	GO:0046872 ;GO:0016491 ;GO:0046872 ;GO:0016491 ;GO:0020037 ;GO:0016705 ;GO:0004497 ;GO:0005506 ;GO:0055114 ;GO:0020037 ;GO:0016705 ;GO:0004497 ;GO:0005506 ;GO:0055114 ;GO:0020037 ;GO:0016705 ;GO:0004497 ;GO:0005506 ;GO:0055114 ;GO:0020037 ;GO:0016705 ;GO:0004497 ;GO:0005506 ;GO:0055114 ;GO:0020037 ;GO:0016705 ;GO:0004497 ;GO:0005506 ;GO:0055114	CYP72A	CYP72
Zoff326063	A	1895	0	0	0	0	0	0	0	1	0	142	0	2	0	0	0	0	0	0	0	0.05	0	7.18	0	0.1	0	0	0.0166667	2.42667	gi|302883945|ref|XP_003040870.1|	hypothetical protein NECHADRAFT_87315 [Nectria haematococca mpVI 77-13-4]	fgr:FG03796.1	hypothetical protein	Hs4758104	[Q] KOG0684 Cytochrome P450	sp|O75881|CP7B1_HUMAN	25-hydroxycholesterol 7-alpha-hydroxylase OS=Homo sapiens GN=CYP7B1 PE=1 SV=2	GO:0046872 ;GO:0016491	CYP7B	CYP7
Zoff326109	D	441	18	13	10	1187.04	356	710	130	2	49	102	94	168	0.89	0.75	0.5	60.22	18.41	35.1	6.4	0.1	2.42	5.16	4.66	8.46	0.713333	37.91	2.97333	6.09333	gi|695010775|ref|XP_009392073.1|	PREDICTED: cytochrome P450 71A1-like [Musa acuminata subsp. malaccensis]	vvi:100260935	hypothetical protein LOC100260935	At3g26210	[Q] KOG0156 Cytochrome P450 CYP2 subfamily	sp|P24465|C71A1_PERAE	Cytochrome P450 71A1 OS=Persea americana GN=CYP71A1 PE=1 SV=2	GO:0004497 ;GO:0005506 ;GO:0020037 ;GO:0031090 ;GO:0016705 ;GO:0005783 ;GO:0044425 ;GO:0055114	CYP71A	CYP71
Zoff326243	D	1645	0	0	0	0	0	0	0	0	0	28	0	0	0	0	0	0	0	0	0	0	0	1.42	0	0	0	0	0	0.473333	gi|302928416|ref|XP_003054700.1|	hypothetical protein NECHADRAFT_103282 [Nectria haematococca mpVI 77-13-4]	pcs:Pc13g14720	Pc13g14720	At5g58860	[QI] KOG0157 Cytochrome P450 CYP4/CYP19/CYP26 subfamilies	sp|Q12645|PID9_FUSSO	Pisatin demethylase OS=Fusarium solani subsp. pisi GN=PDAT9 PE=3 SV=1	GO:0020037 ;GO:0016705 ;GO:0004497 ;GO:0005506 ;GO:0032259 ;GO:0055114 ;GO:0008168	CYP	CYP
Zoff326591	A	1478	0	0	0	11	0	0	0	0	0	0	0	0	0	0	0	0.56	0	0	0	0	0	0	0	0	0	0.186667	0	0	gi|639560207|gb|KDN38011.1|	hypothetical protein RSAG8_09784, partial [Rhizoctonia solani AG-8 WAC10335]	lbc:LACBIDRAFT_295462	hypothetical protein	Hs4503201	[Q] KOG0156 Cytochrome P450 CYP2 subfamily	sp|O13345|ORDA_ASPPA	O-methylsterigmatocystin oxidoreductase OS=Aspergillus parasiticus GN=ordA PE=1 SV=1	GO:0046872 ;GO:0016491	CYP	CYP
Zoff328066	A	450	0	0	3	0	0	0	0	0	0	0	0	0	0	0	0.15	0	0	0	0	0	0	0	0	0	0.05	0	0	0	gi|628058015|ref|XP_007695456.1|	hypothetical protein COCSADRAFT_33124 [Bipolaris sorokiniana ND90Pr]	pno:SNOG_04607	hypothetical protein	7293912	[QI] KOG0157 Cytochrome P450 CYP4/CYP19/CYP26 subfamilies	sp|Q12609|STCF_EMENI	Probable sterigmatocystin biosynthesis P450 monooxygenase stcF OS=Emericella nidulans (strain FGSC A4 / ATCC 38163 / CBS 112.46 / NRRL 194 / M139) GN=stcF PE=3 SV=3	GO:0020037 ;GO:0016705 ;GO:0004497 ;GO:0005506 ;GO:0055114	CYP60A	CYP60
Zoff328070	C	350	1	6	5	161	37	77	26	1	7	14	14	36	0.05	0.34	0.25	8.17	1.91	3.81	1.28	0.05	0.35	0.71	0.69	1.81	0.213333	4.63	0.56	1.07	gi|695035176|ref|XP_009405039.1|	PREDICTED: cytochrome P450 71B10-like [Musa acuminata subsp. malaccensis]	vvi:100263449	hypothetical protein LOC100263449	At3g26300	[Q] KOG0156 Cytochrome P450 CYP2 subfamily	sp|H2DH20|C7D13_PANGI	Cytochrome P450 CYP71D313 OS=Panax ginseng PE=2 SV=1	GO:0020037 ;GO:0016705 ;GO:0004497 ;GO:0005506 ;GO:0055114	CYP71D	CYP71
Zoff328724	D	835	0	0	0	0	0	0	0	0	0	15	0	0	0	0	0	0	0	0	0	0	0	0.76	0	0	0	0	0	0.253333	gi|685852699|ref|XP_009253382.1|	hypothetical protein FPSE_01988 [Fusarium pseudograminearum CS3096]	fgr:FG02419.1	hypothetical protein	CE15823	[Q] KOG0158 Cytochrome P450 CYP3/CYP5/CYP6/CYP9 subfamilies	sp|Q12645|PID9_FUSSO	Pisatin demethylase OS=Fusarium solani subsp. pisi GN=PDAT9 PE=3 SV=1	GO:0020037 ;GO:0016705 ;GO:0004497 ;GO:0005506 ;GO:0032259 ;GO:0055114 ;GO:0008168	CYP	CYP
Zoff329324	A	473	0	0	0	0	0	0	2	0	0	0	0	2	0	0	0	0	0	0	0.1	0	0	0	0	0.1	0	0	0.0333333	0.0333333	gi|465795487|emb|CCV00005.1|	unnamed protein product [Malassezia sympodialis ATCC 42132]	mgl:MGL_0310	hypothetical protein; K09831 C-22 sterol desaturase [EC:1.14.14.-]	SPAC19A8.04	[QI] KOG0157 Cytochrome P450 CYP4/CYP19/CYP26 subfamilies	sp|O13820|ERG5_SCHPO	Cytochrome P450 61 OS=Schizosaccharomyces pombe (strain 972 / ATCC 24843) GN=erg5 PE=1 SV=3	GO:0000249 ;GO:0004497 ;GO:0005506 ;GO:0020037 ;GO:0006696 ;GO:0005783 ;GO:0055114	CYP61	CYP61
Zoff329890	A	1282	0	0	0	0	0	0	0	0	0	22	0	0	0	0	0	0	0	0	0	0	0	1.11	0	0	0	0	0	0.37	gi|302897178|ref|XP_003047468.1|	hypothetical protein NECHADRAFT_53879 [Nectria haematococca mpVI 77-13-4]	nfi:NFIA_094190	Cytochrome P450 oxidoreductase, putative	Hs4503203	[Q] KOG0156 Cytochrome P450 CYP2 subfamily	sp|A1DA63|FTME_NEOFI	Fumitremorgin C synthase OS=Neosartorya fischeri (strain ATCC 1020 / DSM 3700 / FGSC A1164 / NRRL 181) GN=ftmP450-2 PE=3 SV=1	GO:0020037 ;GO:0016705 ;GO:0004497 ;GO:0005506 ;GO:0055114	CYP2	CYP2
Zoff330761	A	785	0	0	0	0	0	0	0	0	0	6	0	0	0	0	0	0	0	0	0	0	0	0.3	0	0	0	0	0	0.1	gi|587692325|gb|EWZ38930.1|	hypothetical protein FOZG_08169 [Fusarium oxysporum Fo47]	fgr:FG02872.1	hypothetical protein	Hs13929429	[Q] KOG0684 Cytochrome P450	sp|Q9UNU6|CP8B1_HUMAN	7-alpha-hydroxycholest-4-en-3-one 12-alpha-hydroxylase OS=Homo sapiens GN=CYP8B1 PE=2 SV=2	GO:0020037 ;GO:0016705 ;GO:0004497 ;GO:0005506 ;GO:0055114	CYP8B	CYP8
Zoff331389	B	438	0	0	0	0	0	0	4	0	0	0	0	0	0	0	0	0	0	0	0.2	0	0	0	0	0	0	0	0.0666667	0	gi|576989749|gb|EUC62468.1|	O-methylsterigmatocystin oxidoreductase [Rhizoctonia solani AG-3 Rhs1AP]	cci:CC1G_05214	cytochrome P450	CE07227	[Q] KOG0156 Cytochrome P450 CYP2 subfamily	sp|O13345|ORDA_ASPPA	O-methylsterigmatocystin oxidoreductase OS=Aspergillus parasiticus GN=ordA PE=1 SV=1	GO:0020037 ;GO:0016705 ;GO:0004497 ;GO:0005506 ;GO:0055114	CYP	CYP
Zoff331487	A	597	0	0	0	0	0	0	0	0	0	9	0	0	0	0	0	0	0	0	0	0	0	0.46	0	0	0	0	0	0.153333	gi|477518763|gb|ENH70963.1|	Trichodiene oxygenase [Fusarium oxysporum f. sp. cubense race 1]	fgr:FG08809.1	hypothetical protein	At2g42250	[Q] KOG0156 Cytochrome P450 CYP2 subfamily	sp|Q12612|TRI4_FUSSP	Trichodiene oxygenase OS=Fusarium sporotrichioides GN=TRI4 PE=3 SV=1	GO:0020037 ;GO:0016705 ;GO:0004497 ;GO:0005506 ;GO:0055114	CYP	CYP
Zoff331619	D	977	3	2	0	0	1	4	0	0	2	2	1	0	0.15	0.11	0	0	0.05	0.2	0	0	0.1	0.1	0.05	0	0.0866667	0.0833333	0.0333333	0.05	gi|694999984|ref|XP_009409655.1|	PREDICTED: cytochrome P450 71A1-like [Musa acuminata subsp. malaccensis]	vvi:100253593	hypothetical protein LOC100253593	At3g26310	[Q] KOG0156 Cytochrome P450 CYP2 subfamily	sp|P24465|C71A1_PERAE	Cytochrome P450 71A1 OS=Persea americana GN=CYP71A1 PE=1 SV=2	GO:0005488 ;GO:0016491 ;GO:0043231 ;GO:0016020	CYP71A	CYP71
Zoff332673	B	541	0	0	0	0	0	3	0	0	0	0	0	0	0	0	0	0	0	0.15	0	0	0	0	0	0	0	0.05	0	0	gi|566022806|gb|ETI45717.1|	hypothetical protein F443_09789 [Phytophthora parasitica P1569]	pif:PITG_14013	cytochrome P450, putative	At5g23190	[QI] KOG0157 Cytochrome P450 CYP4/CYP19/CYP26 subfamilies	sp|Q9FMY1|C86B1_ARATH	Cytochrome P450 86B1 OS=Arabidopsis thaliana GN=CYP86B1 PE=2 SV=1	GO:0016491 ;GO:0005488	CYP86B	CYP86
Zoff332732	B	982	1	0	8	0	0	0	0	0	0	1	0	1	0.05	0	0.4	0	0	0	0	0	0	0.05	0	0.05	0.15	0	0	0.0333333	gi|656913969|gb|KEF59549.1|	hypothetical protein A1O9_04393 [Exophiala aquamarina CBS 119918]	ssl:SS1G_09538	hypothetical protein	At4g39490	[QI] KOG0157 Cytochrome P450 CYP4/CYP19/CYP26 subfamilies	sp|O23066|C86A2_ARATH	Cytochrome P450 86A2 OS=Arabidopsis thaliana GN=CYP86A2 PE=1 SV=1	GO:0046872 ;GO:0016491	CYP86A	CYP86
Zoff332762	D	1103	2	7	14	0	1	0	0	0	0	0	0	0	0.1	0.4	0.69	0	0.05	0	0	0	0	0	0	0	0.396667	0.0166667	0	0	gi|443914945|gb|ELU36619.1|	cytochrome P450 monooxygenase pc-bph [Rhizoctonia solani AG-1 IA]	cci:CC1G_11080	cytochrome P450 monooxygenase pc-bph; K07824 benzoate 4-monooxygenase [EC:1.14.13.12]	CE01657	[Q] KOG0158 Cytochrome P450 CYP3/CYP5/CYP6/CYP9 subfamilies	sp|P17549|CP53_ASPNG	Benzoate 4-monooxygenase OS=Aspergillus niger GN=bphA PE=1 SV=1	GO:0020037 ;GO:0016705 ;GO:0004497 ;GO:0005506 ;GO:0055114	CYP	CYP
Zoff333109	A	554	0	0	0	3	0	4	0	0	0	0	0	0	0	0	0	0.15	0	0.2	0	0	0	0	0	0	0	0.116667	0	0	gi|695431386|ref|XP_009530671.1|	hypothetical protein PHYSODRAFT_351876 [Phytophthora sojae]	pif:PITG_21759	cytochrome P450, putative	--	--	--	--	GO:0016491 ;GO:0005488	CYP	CYP
Zoff335184	C	774	7	1	4	1	0	0	0	0	0	0	0	0	0.34	0.06	0.2	0.05	0	0	0	0	0	0	0	0	0.2	0.0166667	0	0	gi|443918659|gb|ELU39069.1|	cytochrome P450 [Rhizoctonia solani AG-1 IA]	--	--	--	--	--	--	GO:0020037 ;GO:0016705 ;GO:0004497 ;GO:0005506 ;GO:0055114	CYP	CYP
Zoff335342	D	322	0	2	0	0	0	0	1	2	0	0	1	0	0	0.11	0	0	0	0	0.05	0.1	0	0	0.05	0	0.0366667	0	0.05	0.0166667	gi|357491167|ref|XP_003615871.1|	Cytochrome P450 [Medicago truncatula]	sbi:SORBI_04g005850	hypothetical protein	At3g26230	[Q] KOG0156 Cytochrome P450 CYP2 subfamily	sp|O22307|C71DB_LOTJA	Cytochrome P450 71D11 (Fragment) OS=Lotus japonicus GN=CYP71D11 PE=2 SV=1	GO:0046872 ;GO:0016705 ;GO:0004497	CYP71D	CYP71
Zoff335402	A	526	0	0	0	0	0	0	0	0	0	0	0	6	0	0	0	0	0	0	0	0	0	0	0	0.3	0	0	0	0.1	gi|558142692|ref|XP_006092709.1|	PREDICTED: cytochrome P450 4V2-like [Myotis lucifugus]	mmu:102294	Cyp4v3, AU043077, AW111961; cytochrome P450, family 4, subfamily v, polypeptide 3; K07427 cytochrome P450, family 4, subfamily V	CE02952	[QI] KOG0157 Cytochrome P450 CYP4/CYP19/CYP26 subfamilies	sp|Q9DBW0|CP4V2_MOUSE	Cytochrome P450 4V2 OS=Mus musculus GN=Cyp4v2 PE=1 SV=1	GO:0016709	CYP4V	CYP4
Zoff335637	C	443	1	0	0	0	0	1	0	0	0	0	0	0	0.05	0	0	0	0	0.05	0	0	0	0	0	0	0.0166667	0.0166667	0	0	gi|576995267|gb|EUC67666.1|	cytochrome P450 family protein [Rhizoctonia solani AG-3 Rhs1AP]	ppl:POSPLDRAFT_87307	hypothetical protein	At5g67310	[Q] KOG0156 Cytochrome P450 CYP2 subfamily	sp|O81971|C71D9_SOYBN	Cytochrome P450 71D9 OS=Glycine max GN=CYP71D9 PE=2 SV=1	GO:0020037 ;GO:0016705 ;GO:0004497 ;GO:0005506 ;GO:0055114	CYP71D	CYP71
Zoff336230	A	463	2	0	0	0	0	0	0	0	0	0	0	0	0.1	0	0	0	0	0	0	0	0	0	0	0	0.0333333	0	0	0	gi|283767092|gb|ADB28857.1|	cytochrome P450 CYP15A1-like protein, partial [Tigriopus japonicus]	cin:100177830	similar to cytochrome P450, family 2, subfamily U, polypeptide 1	Hs18491008	[Q] KOG0156 Cytochrome P450 CYP2 subfamily	sp|P52786|CP2J1_RABIT	Cytochrome P450 2J1 OS=Oryctolagus cuniculus GN=CYP2J1 PE=1 SV=2	--	CYP15A	CYP15
Zoff336591	A	842	0	0	0	0	0	0	0	0	0	0	1	7	0	0	0	0	0	0	0	0	0	0	0.05	0.35	0	0	0	0.133333	gi|628350677|ref|XP_007750574.1|	hypothetical protein A1O5_11814 [Cladophialophora psammophila CBS 110553]	pcs:Pc20g05940	Pc20g05940	At4g12300	[Q] KOG0156 Cytochrome P450 CYP2 subfamily	sp|B8NHY4|ORDA_ASPFN	O-methylsterigmatocystin oxidoreductase OS=Aspergillus flavus (strain ATCC 200026 / FGSC A1120 / NRRL 3357 / JCM 12722 / SRRC 167) GN=ordA PE=2 SV=1	GO:0016709 ;GO:0046872	CYP	CYP
Zoff337313	A	483	1	0	0	0	0	0	0	0	0	0	0	6	0.05	0	0	0	0	0	0	0	0	0	0	0.3	0.0166667	0	0	0.1	gi|552837904|ref|XP_005849468.1|	hypothetical protein CHLNCDRAFT_30281 [Chlorella variabilis]	ath:AT2G34500	CYP710A1 (cytochrome P450, family 710, subfamily A, polypeptide 1); C-22 sterol desaturase/ oxygen binding; K09832 cytochrome P450, family 710, subfamily A	At2g34500	[QI] KOG0157 Cytochrome P450 CYP4/CYP19/CYP26 subfamilies	sp|O64697|C7101_ARATH	Cytochrome P450 710A1 OS=Arabidopsis thaliana GN=CYP710A1 PE=1 SV=1	GO:0046872 ;GO:0019375 ;GO:0019825 ;GO:0042631 ;GO:0010583 ;GO:0005576 ;GO:0009407 ;GO:0016036 ;GO:0000249 ;GO:0019745 ;GO:0016126	CYP710A	CYP710
Zoff338006	A	752	5	0	0	0	0	0	0	0	0	0	0	0	0.25	0	0	0	0	0	0	0	0	0	0	0	0.0833333	0	0	0	gi|675389734|gb|KFM82631.1|	Cytochrome P450 3A13, partial [Stegodyphus mimosarum]	isc:IscW_ISCW019880	cytochrome P450, putative (EC:1.14.14.1)	7302303	[Q] KOG0158 Cytochrome P450 CYP3/CYP5/CYP6/CYP9 subfamilies	sp|Q964R0|CP6K1_BLAGE	Cytochrome P450 6k1 OS=Blattella germanica GN=CYP6K1 PE=2 SV=1	GO:0016491	CYP3A	CYP3
Zoff338322	D	3527	37	25	527	7	23	2	6	8	9	10	2	264	1.82	1.44	26.15	0.36	1.19	0.1	0.3	0.4	0.44	0.51	0.1	13.29	9.80333	0.55	0.38	4.63333	gi|630019730|ref|XP_007833515.1|	hypothetical protein PFICI_06743 [Pestalotiopsis fici W106-1]	afv:AFLA_004370	cytochrome P450 oxidoreductase, putative	Hs4503231	[Q] KOG0158 Cytochrome P450 CYP3/CYP5/CYP6/CYP9 subfamilies	sp|Q4WAW5|FTMC_ASPFU	Tryprostatin B 6-hydroxylase OS=Neosartorya fumigata (strain ATCC MYA-4609 / Af293 / CBS 101355 / FGSC A1100) GN=ftmP450-1 PE=3 SV=2	GO:0046872 ;GO:0008152 ;GO:0016491	CYP	CYP
Zoff338375	A	462	0	0	0	0	0	0	0	0	2	1	0	0	0	0	0	0	0	0	0	0	0.1	0.05	0	0	0	0	0.0333333	0.0166667	gi|587683038|gb|EWZ29643.1|	hypothetical protein FOZG_16532 [Fusarium oxysporum Fo47]	afv:AFLA_122250	cytochrome P450, putative	--	--	sp|P17549|CP53_ASPNG	Benzoate 4-monooxygenase OS=Aspergillus niger GN=bphA PE=1 SV=1	GO:0046872 ;GO:0008152 ;GO:0016491	CYP	CYP
Zoff338707	A	488	2	0	1	1	0	0	0	0	0	0	0	0	0.1	0	0.05	0.05	0	0	0	0	0	0	0	0	0.05	0.0166667	0	0	gi|639559422|gb|KDN37289.1|	LOW QUALITY PROTEIN: hypothetical protein RSAG8_10271, partial [Rhizoctonia solani AG-8 WAC10335]	ppl:POSPLDRAFT_27511	hypothetical protein	Hs22049499	[C] KOG1158 NADP/FAD dependent oxidoreductase	sp|Q9Y8G7|C505_FUSOX	Bifunctional P-450:NADPH-P450 reductase OS=Fusarium oxysporum GN=CYP505 PE=1 SV=1	GO:0003958 ;GO:0005506 ;GO:0010181 ;GO:0020037 ;GO:0008270 ;GO:0070330 ;GO:0055114	CYP505	CYP505
Zoff339375	D	387	0	0	0	0	0	0	0	3	0	0	0	0	0	0	0	0	0	0	0	0.15	0	0	0	0	0	0	0.05	0	gi|568298508|gb|ETN84535.1|	unspecific monooxygenase [Necator americanus]	cel:Y80D3A.5	cyp-42A1; CYtochrome P450 family member (cyp-42A1)	CE23108	[QI] KOG0157 Cytochrome P450 CYP4/CYP19/CYP26 subfamilies	sp|P29981|CP4C1_BLADI	Cytochrome P450 4C1 OS=Blaberus discoidalis GN=CYP4C1 PE=2 SV=1	GO:0046872 ;GO:0016491	CYP42A	CYP42
Zoff339530	D	779	0	0	6.64	0	0	0	0	0	0	0	0	1	0	0	0.33	0	0	0	0	0	0	0	0	0.05	0.11	0	0	0.0166667	gi|189211678|ref|XP_001942168.1|	cytochrome P450 [Pyrenophora tritici-repentis Pt-1C-BFP]	afv:AFLA_101730	ferulate-5-hydroxylase, putative	At5g09970	[Q] KOG0156 Cytochrome P450 CYP2 subfamily	sp|Q701P2|KO1_GIBIN	Ent-kaurene oxidase OS=Gibberella intermedia GN=CYP503A1 PE=1 SV=1	--	CYP503A	CYP503
Zoff339531	D	430	0	0	1.36	0	0	0	0	0	0	0	0	2	0	0	0.07	0	0	0	0	0	0	0	0	0.1	0.0233333	0	0	0.0333333	gi|238505663|ref|XP_002384045.1|	ferulate-5-hydroxylase, putative [Aspergillus flavus NRRL3357]	afv:AFLA_101730	ferulate-5-hydroxylase, putative	Hs7706129	[Q] KOG0684 Cytochrome P450	sp|Q701P2|KO1_GIBIN	Ent-kaurene oxidase OS=Gibberella intermedia GN=CYP503A1 PE=1 SV=1	--	CYP503A	CYP503
Zoff339762	C	348	2	0	0	0	0	0	0	0	0	0	0	0	0.1	0	0	0	0	0	0	0	0	0	0	0	0.0333333	0	0	0	gi|576982252|gb|EUC54995.1|	cytochrome P450 family protein [Rhizoctonia solani AG-3 Rhs1AP]	cci:CC1G_02813	hypothetical protein	Hs22053268	[QI] KOG0157 Cytochrome P450 CYP4/CYP19/CYP26 subfamilies	sp|Q9HCS2|CP4FC_HUMAN	Cytochrome P450 4F12 OS=Homo sapiens GN=CYP4F12 PE=1 SV=2	GO:0020037 ;GO:0016705 ;GO:0004497 ;GO:0005506 ;GO:0055114	CYP3A	CYP3
Zoff340014	D	574	1	0	0	0	0	0	0	0	0	0	0	4	0.05	0	0	0	0	0	0	0	0	0	0	0.2	0.0166667	0	0	0.0666667	gi|194473702|ref|NP_001123994.1|	cytochrome P450 CYP4BN11 [Tribolium castaneum]	tca:100142020	Cyp4bn11; cytochrome P450 CYP4BN11	CE16163	[QI] KOG0157 Cytochrome P450 CYP4/CYP19/CYP26 subfamilies	sp|O35728|CP4AE_MOUSE	Cytochrome P450 4A14 OS=Mus musculus GN=Cyp4a14 PE=2 SV=1	--	CYP4A	CYP4
Zoff340376	A	832	0	0	0	0	0	0	0	0	0	8	0	0	0	0	0	0	0	0	0	0	0	0.4	0	0	0	0	0	0.133333	gi|591474088|gb|EXM05300.1|	hypothetical protein FOIG_05262 [Fusarium oxysporum f. sp. cubense tropical race 4 54006]	fgr:FG05426.1	hypothetical protein	At3g26300	[Q] KOG0156 Cytochrome P450 CYP2 subfamily	sp|Q12608|STCB_EMENI	Probable sterigmatocystin biosynthesis P450 monooxygenase STCB OS=Emericella nidulans (strain FGSC A4 / ATCC 38163 / CBS 112.46 / NRRL 194 / M139) GN=stcB PE=3 SV=2	GO:0020037 ;GO:0016705 ;GO:0004497 ;GO:0005506 ;GO:0055114	CYP	CYP
Zoff340959	B	710	0	0	0	0	3	0	0	0	0	1	1	0	0	0	0	0	0.16	0	0	0	0	0.05	0.05	0	0	0.0533333	0	0.0333333	gi|671180045|ref|XP_008730484.1|	hypothetical protein G647_07950 [Cladophialophora carrionii CBS 160.54]	aor:AOR_1_918024	AO090010000548; n-alkane-inducible cytochrome P450	At1g69500	[QI] KOG0157 Cytochrome P450 CYP4/CYP19/CYP26 subfamilies	sp|Q9Y758|CP52M_DEBHN	Cytochrome P450 52A13 OS=Debaryomyces hansenii GN=CYP52A13 PE=2 SV=1	GO:0020037 ;GO:0016712 ;GO:0005506 ;GO:0055114	CYP52A	CYP52
Zoff342389	A	670	0	0	0	0	0	0	0	0	0	8	0	0	0	0	0	0	0	0	0	0	0	0.4	0	0	0	0	0	0.133333	gi|629661995|ref|XP_007794234.1|	putative cytochrome p450 protein [Eutypa lata UCREL1]	bfu:BC1G_07665	hypothetical protein ; K00489 cytochrome P450, family 7, subfamily A (cholesterol 7alpha-monooxygenase) [EC:1.14.13.17]	--	--	--	--	GO:0016491 ;GO:0005488	CYP	CYP
Zoff343525	A	678	8	0	0	0	0	0	0	0	0	0	0	0	0.39	0	0	0	0	0	0	0	0	0	0	0	0.13	0	0	0	gi|675372833|gb|KFM65735.1|	Cytochrome P450 3A24, partial [Stegodyphus mimosarum]	aag:AaeL_AAEL009126	cytochrome P450	7304034	[Q] KOG0158 Cytochrome P450 CYP3/CYP5/CYP6/CYP9 subfamilies	sp|Q9V4U7|C6A14_DROME	Probable cytochrome P450 6a14 OS=Drosophila melanogaster GN=Cyp6a14 PE=3 SV=2	--	CYP3A	CYP3
Zoff343820	C	595	0	0	0	0	0	0	1	0	3	0	0	0	0	0	0	0	0	0	0.05	0	0.15	0	0	0	0	0	0.0666667	0	gi|639564442|gb|KDN42044.1|	hypothetical protein RSAG8_07089, partial [Rhizoctonia solani AG-8 WAC10335]	lbc:LACBIDRAFT_309740	hypothetical protein	At3g14690	[QI] KOG0157 Cytochrome P450 CYP4/CYP19/CYP26 subfamilies	sp|Q9LUC5|C7A15_ARATH	Cytochrome P450 72A15 OS=Arabidopsis thaliana GN=CYP72A15 PE=2 SV=1	GO:0020037 ;GO:0016705 ;GO:0004497 ;GO:0005506 ;GO:0055114	CYP72A	CYP72
Zoff343935	A	478	2	0	0	0	1	1	0	0	0	0	0	0	0.1	0	0	0	0.05	0.05	0	0	0	0	0	0	0.0333333	0.0333333	0	0	gi|639556962|gb|KDN35143.1|	hypothetical protein RSAG8_11831, partial [Rhizoctonia solani AG-8 WAC10335]	cci:CC1G_06140	cytochrome P450	Hs22064517	[Q] KOG0156 Cytochrome P450 CYP2 subfamily	sp|B8NHY4|ORDA_ASPFN	O-methylsterigmatocystin oxidoreductase OS=Aspergillus flavus (strain ATCC 200026 / FGSC A1120 / NRRL 3357 / JCM 12722 / SRRC 167) GN=ordA PE=2 SV=1	GO:0046872 ;GO:0016491	CYP	CYP
Zoff344470	B	646	0	0	0	0	0	0	0	0	0	8	0	0	0	0	0	0	0	0	0	0	0	0.4	0	0	0	0	0	0.133333	gi|302884086|ref|XP_003040940.1|	hypothetical protein NECHADRAFT_97937 [Nectria haematococca mpVI 77-13-4]	fgr:FG01583.1	hypothetical protein	At2g46660	[Q] KOG0156 Cytochrome P450 CYP2 subfamily	sp|Q9ZNR0|C78A6_ARATH	Cytochrome P450 78A6 OS=Arabidopsis thaliana GN=CYP78A6 PE=2 SV=1	GO:0020037 ;GO:0016705 ;GO:0004497 ;GO:0005506 ;GO:0055114	CYP78A	CYP78
Zoff344931	A	424	2	0	2	0	1	0	0	0	0	0	0	0	0.1	0	0.1	0	0.05	0	0	0	0	0	0	0	0.0666667	0.0166667	0	0	gi|471912745|emb|CCO27149.1|	Cytochrome P450 4c21 [Rhizoctonia solani AG-1 IB]	lbc:LACBIDRAFT_300904	hypothetical protein	--	--	--	--	GO:0046872 ;GO:0016491	CYP4C	CYP4
Zoff345381	D	608	0	0	0	1	0	8	0	0	0	0	0	0	0	0	0	0.05	0	0.4	0	0	0	0	0	0	0	0.15	0	0	gi|567958569|gb|ETK84156.1|	hypothetical protein L915_10847, partial [Phytophthora parasitica]	pif:PITG_03058	cytochrome P450, putative	At1g13140	[QI] KOG0157 Cytochrome P450 CYP4/CYP19/CYP26 subfamilies	sp|Q9SMP5|C94B3_ARATH	Cytochrome P450 94B3 OS=Arabidopsis thaliana GN=CYP94B3 PE=2 SV=1	GO:0046872 ;GO:0016491	CYP94B	CYP94
Zoff345514	B	547	6	0	0	0	0	0	0	0	0	0	0	0	0.3	0	0	0	0	0	0	0	0	0	0	0	0.1	0	0	0	gi|241671632|ref|XP_002400108.1|	cytochrome P450, putative [Ixodes scapularis]	isc:IscW_ISCW022071	cytochrome P450, putative (EC:1.14.14.1)	At3g53280	[Q] KOG0156 Cytochrome P450 CYP2 subfamily	sp|Q94FM7|C71DK_TOBAC	5-epiaristolochene 1,3-dihydroxylase OS=Nicotiana tabacum GN=CYP71D20 PE=1 SV=2	GO:0016491	CYP71D	CYP71
Zoff345885	A	361	0	0	0	6	0	0	0	0	0	0	0	0	0	0	0	0.3	0	0	0	0	0	0	0	0	0	0.1	0	0	gi|660962247|gb|KEP48073.1|	cytochrome P450 family protein [Rhizoctonia solani 123E]	nve:NEMVE_v1g87502	hypothetical protein	CE23108	[QI] KOG0157 Cytochrome P450 CYP4/CYP19/CYP26 subfamilies	sp|O54750|CP2J6_MOUSE	Cytochrome P450 2J6 OS=Mus musculus GN=Cyp2j6 PE=2 SV=2	GO:0016491 ;GO:0005488	CYP89A	CYP89
Zoff347000	A	302	0	0	0	0	0	0	0	0	0	0	0	1	0	0	0	0	0	0	0	0	0	0	0	0.05	0	0	0	0.0166667	gi|682439068|gb|KFZ02893.1|	hypothetical protein V501_09448 [Pseudogymnoascus pannorum VKM F-4519 (FW-2642)]	bfu:BC1G_01030	hypothetical protein	--	--	sp|Q12609|STCF_EMENI	Probable sterigmatocystin biosynthesis P450 monooxygenase stcF OS=Emericella nidulans (strain FGSC A4 / ATCC 38163 / CBS 112.46 / NRRL 194 / M139) GN=stcF PE=3 SV=3	GO:0016491 ;GO:0005488	CYP60A	CYP60
Zoff347515	A	735	0	0	1	0	0	0	2	0	3	0	0	0	0	0	0.05	0	0	0	0.1	0	0.15	0	0	0	0.0166667	0	0.0833333	0	gi|628287578|ref|XP_007732840.1|	hypothetical protein A1O3_04521 [Capronia epimyces CBS 606.96]	nfi:NFIA_047320	Cytochrome P450 oxidoreductase, putative	At3g28740	[Q] KOG0156 Cytochrome P450 CYP2 subfamily	sp|Q4WAW8|FTME_ASPFU	Fumitremorgin C synthase OS=Neosartorya fumigata (strain ATCC MYA-4609 / Af293 / CBS 101355 / FGSC A1100) GN=ftmP450-2 PE=3 SV=1	GO:0046872 ;GO:0016491	CYP2	CYP2
Zoff348258	A	699	2	0	0.5	0.5	0.5	0	0	0	0	0	0	0	0.1	0	0.02	0.03	0.03	0	0	0	0	0	0	0	0.04	0.02	0	0	gi|576993899|gb|EUC66565.1|	cytochrome P450 family monooxygenase [Rhizoctonia solani AG-3 Rhs1AP]	lbc:LACBIDRAFT_291185	cytochrome P450 monooxygenase; K07824 benzoate 4-monooxygenase [EC:1.14.13.12]	--	--	sp|P17549|CP53_ASPNG	Benzoate 4-monooxygenase OS=Aspergillus niger GN=bphA PE=1 SV=1	GO:0020037 ;GO:0016705 ;GO:0004497 ;GO:0005506 ;GO:0055114	CYP	CYP
Zoff348259	A	699	0	0	0.5	0.5	0.5	1	0	0	0	0	0	0	0	0	0.02	0.03	0.03	0.05	0	0	0	0	0	0	0.00666667	0.0366667	0	0	gi|471908823|emb|CCO28207.1|	hypothetical protein BN14_02200 [Rhizoctonia solani AG-1 IB]	lbc:LACBIDRAFT_291185	cytochrome P450 monooxygenase; K07824 benzoate 4-monooxygenase [EC:1.14.13.12]	--	--	sp|P17549|CP53_ASPNG	Benzoate 4-monooxygenase OS=Aspergillus niger GN=bphA PE=1 SV=1	GO:0020037 ;GO:0016705 ;GO:0004497 ;GO:0005506 ;GO:0055114	CYP	CYP
Zoff349576	A	1387	2	5.96	0	5.97	0	7.97	1.98	11	3	1	0	0	0.1	0.34	0	0.3	0	0.39	0.1	0.55	0.15	0.05	0	0	0.146667	0.23	0.266667	0.0166667	gi|628328961|ref|XP_007743987.1|	hypothetical protein A1O5_05195 [Cladophialophora psammophila CBS 110553]	afv:AFLA_004370	cytochrome P450 oxidoreductase, putative	CE23627	[Q] KOG0158 Cytochrome P450 CYP3/CYP5/CYP6/CYP9 subfamilies	sp|Q4WAW5|FTMC_ASPFU	Tryprostatin B 6-hydroxylase OS=Neosartorya fumigata (strain ATCC MYA-4609 / Af293 / CBS 101355 / FGSC A1100) GN=ftmP450-1 PE=3 SV=2	GO:0046872 ;GO:0016491	CYP	CYP
Zoff349577	A	1388	0	0.04	0	0.03	11	0.03	0.02	0	0	0	0	0	0	0	0	0	0.57	0	0	0	0	0	0	0	0	0.19	0	0	gi|628328961|ref|XP_007743987.1|	hypothetical protein A1O5_05195 [Cladophialophora psammophila CBS 110553]	ang:ANI_1_2140184	An04g08440; L-ornithine-N5-monooxygenase	7297268	[QI] KOG0157 Cytochrome P450 CYP4/CYP19/CYP26 subfamilies	sp|Q4WAW5|FTMC_ASPFU	Tryprostatin B 6-hydroxylase OS=Neosartorya fumigata (strain ATCC MYA-4609 / Af293 / CBS 101355 / FGSC A1100) GN=ftmP450-1 PE=3 SV=2	GO:0016491 ;GO:0005488	CYP	CYP
Zoff350225	A	383	4	0	0	0	0	0	0	0	0	0	0	0	0.2	0	0	0	0	0	0	0	0	0	0	0	0.0666667	0	0	0	gi|675389734|gb|KFM82631.1|	Cytochrome P450 3A13, partial [Stegodyphus mimosarum]	xtr:100487054	cytochrome P450 3A24-like	CE15823	[Q] KOG0158 Cytochrome P450 CYP3/CYP5/CYP6/CYP9 subfamilies	sp|P11707|CP3A6_RABIT	Cytochrome P450 3A6 OS=Oryctolagus cuniculus GN=CYP3A6 PE=2 SV=2	GO:0005488 ;GO:0043231 ;GO:0044710 ;GO:0016705 ;GO:0004497 ;GO:0016020	CYP3A	CYP3
Zoff352089	A	745	0	0	0	0	0	0	0	0	0	0	0	11	0	0	0	0	0	0	0	0	0	0	0	0.55	0	0	0	0.183333	gi|585113206|gb|EWM30542.1|	cytochrome p450 hydroxylase [Nannochloropsis gaditana]	ssl:SS1G_04780	hypothetical protein	Hs16933535	[Q] KOG0158 Cytochrome P450 CYP3/CYP5/CYP6/CYP9 subfamilies	sp|P11707|CP3A6_RABIT	Cytochrome P450 3A6 OS=Oryctolagus cuniculus GN=CYP3A6 PE=2 SV=2	--	CYP3A	CYP3
Zoff352224	D	538	0	0	4	0	0	0	1	0	0	0	0	0	0	0	0.2	0	0	0	0.05	0	0	0	0	0	0.0666667	0	0.0166667	0	gi|281209324|gb|EFA83496.1|	NADPH-cytochrome-P450 oxidoreductase [Polysphondylium pallidum PN500]	ddi:DDB_G0269912	redB; NADPH-cytochrome-P450 oxidoreductase; K00327 NADPH-ferrihemoprotein reductase [EC:1.6.2.4]	At4g24520	[C] KOG1158 NADP/FAD dependent oxidoreductase	sp|Q55CT1|REDB_DICDI	NADPH oxidoreductase B OS=Dictyostelium discoideum GN=redB PE=2 SV=1	GO:0044699 ;GO:0044444 ;GO:0043167	CYP	CYP
Zoff352376	A	463	1	0	2	0	0	0	0	1	0	1	0	1	0.05	0	0.1	0	0	0	0	0.05	0	0.05	0	0.05	0.05	0	0.0166667	0.0333333	gi|656909898|gb|KEF55576.1|	hypothetical protein A1O9_08326 [Exophiala aquamarina CBS 119918]	nfi:NFIA_047320	Cytochrome P450 oxidoreductase, putative	Hs19743565	[Q] KOG0156 Cytochrome P450 CYP2 subfamily	sp|B8NHY4|ORDA_ASPFN	O-methylsterigmatocystin oxidoreductase OS=Aspergillus flavus (strain ATCC 200026 / FGSC A1120 / NRRL 3357 / JCM 12722 / SRRC 167) GN=ordA PE=2 SV=1	GO:0020037 ;GO:0016705 ;GO:0005506 ;GO:0009055 ;GO:0055114	CYP	CYP
Zoff355323	A	473	0	0	0	0	0	0	0	0	0	2	0	0	0	0	0	0	0	0	0	0	0	0.1	0	0	0	0	0	0.0333333	gi|477526646|gb|ENH78507.1|	cytochrome p450 61 [Colletotrichum orbiculare MAFF 240422]	ncr:NCU05278	cytochrome P450 61	YMR015c	[QI] KOG0157 Cytochrome P450 CYP4/CYP19/CYP26 subfamilies	sp|P54781|ERG5_YEAST	Cytochrome P450 61 OS=Saccharomyces cerevisiae (strain ATCC 204508 / S288c) GN=ERG5 PE=1 SV=1	GO:0000249 ;GO:0004497 ;GO:0005506 ;GO:0020037 ;GO:0006696 ;GO:0005783 ;GO:0055114	CYP61	CYP61
Zoff356789	A	381	0	0	0	0	0	0	1	0	3	0	0	0	0	0	0	0	0	0	0.05	0	0.15	0	0	0	0	0	0.0666667	0	gi|639563953|gb|KDN41575.1|	hypothetical protein RSAG8_07376, partial [Rhizoctonia solani AG-8 WAC10335]	mpr:MPER_09360	hypothetical protein	7304034	[Q] KOG0158 Cytochrome P450 CYP3/CYP5/CYP6/CYP9 subfamilies	sp|G5EB19|PPOA_EMENI	Psi-producing oxygenase A OS=Emericella nidulans (strain FGSC A4 / ATCC 38163 / CBS 112.46 / NRRL 194 / M139) GN=ppoA PE=3 SV=1	GO:0020037 ;GO:0016705 ;GO:0005506 ;GO:0004601 ;GO:0055114 ;GO:0006979	CYP	CYP
Zoff358834	A	411	2	0	0	0	0	0	0	0	0	0	0	0	0.1	0	0	0	0	0	0	0	0	0	0	0	0.0333333	0	0	0	gi|675390078|gb|KFM82975.1|	hypothetical protein X975_00801, partial [Stegodyphus mimosarum]	dre:792041	tbxas1, MGC136708, wu:fk19d08, zgc:136708; thromboxane A synthase 1 (platelet, cytochrome P450, family 5, subfamily A) (EC:5.3.99.5); K01832 cytochrome P450, family 5, subfamily A (thromboxane-A synthase) [EC:5.3.99.5]	Hs4503233	[Q] KOG0158 Cytochrome P450 CYP3/CYP5/CYP6/CYP9 subfamilies	sp|P24462|CP3A7_HUMAN	Cytochrome P450 3A7 OS=Homo sapiens GN=CYP3A7 PE=1 SV=2	GO:0016491	CYP3A	CYP3
Zoff364726	A	480	1	0	0	0	2	0	0	0	0	0	0	2	0.05	0	0	0	0.1	0	0	0	0	0	0	0.1	0.0166667	0.0333333	0	0.0333333	gi|628339105|ref|XP_007746882.1|	hypothetical protein A1O5_08107 [Cladophialophora psammophila CBS 110553]	pcs:Pc20g05940	Pc20g05940	At2g45550	[Q] KOG0156 Cytochrome P450 CYP2 subfamily	sp|O54749|CP2J5_MOUSE	Cytochrome P450 2J5 OS=Mus musculus GN=Cyp2j5 PE=2 SV=1	GO:0020037 ;GO:0016705 ;GO:0004497 ;GO:0005506 ;GO:0055114	CYP2J	CYP2
Zoff365787	B	327	0	0	0	0	1	2	0	0	0	0	0	0	0	0	0	0	0.05	0.1	0	0	0	0	0	0	0	0.05	0	0	gi|598026643|ref|XP_007342694.1|	cytochrome P450 [Auricularia delicata TFB-10046 SS5]	ppl:POSPLDRAFT_101975	hypothetical protein	At1g50520	[Q] KOG0156 Cytochrome P450 CYP2 subfamily	sp|A1DA65|FTMG_NEOFI	Fumitremorgin C monooxygenase OS=Neosartorya fischeri (strain ATCC 1020 / DSM 3700 / FGSC A1164 / NRRL 181) GN=ftmP450-3 PE=3 SV=1	GO:0016491 ;GO:0005488	CYP2	CYP2
Zoff368065	C	397	0	0	0	3	0	0	0	0	0	0	0	0	0	0	0	0.15	0	0	0	0	0	0	0	0	0	0.05	0	0	gi|471868232|emb|CCO37484.1|	O-methylsterigmatocystin oxidoreductase Short=OMST oxidoreductase [Rhizoctonia solani AG-1 IB]	cci:CC1G_05781	OrdA protein	At2g45550	[Q] KOG0156 Cytochrome P450 CYP2 subfamily	sp|B8NHY4|ORDA_ASPFN	O-methylsterigmatocystin oxidoreductase OS=Aspergillus flavus (strain ATCC 200026 / FGSC A1120 / NRRL 3357 / JCM 12722 / SRRC 167) GN=ordA PE=2 SV=1	GO:0046872 ;GO:0016491	CYP	CYP
Zoff368383	D	386	0	0	0	0	0	0	0	0	0	3	0	0	0	0	0	0	0	0	0	0	0	0.15	0	0	0	0	0	0.05	gi|636596839|ref|XP_008029758.1|	hypothetical protein SETTUDRAFT_156410 [Setosphaeria turcica Et28A]	pno:SNOG_08051	hypothetical protein	Hs4503241	[QI] KOG0157 Cytochrome P450 CYP4/CYP19/CYP26 subfamilies	sp|Q12732|AVNA_ASPPA	Averantin hydroxylase OS=Aspergillus parasiticus GN=avnA PE=1 SV=2	GO:0020037 ;GO:0016705 ;GO:0004497 ;GO:0005506 ;GO:0055114	CYP46A	CYP46
Zoff369139	D	367	0	0	0	3	0	0	0	0	0	0	0	0	0	0	0	0.15	0	0	0	0	0	0	0	0	0	0.05	0	0	gi|667729627|gb|KFA70354.1|	hypothetical protein S40285_01749 [Stachybotrys chlorohalonata IBT 40285]	cim:CIMG_02277	hypothetical protein	--	--	sp|Q4WAW5|FTMC_ASPFU	Tryprostatin B 6-hydroxylase OS=Neosartorya fumigata (strain ATCC MYA-4609 / Af293 / CBS 101355 / FGSC A1100) GN=ftmP450-1 PE=3 SV=2	GO:0055114 ;GO:0016705 ;GO:0005741 ;GO:0004497 ;GO:0044425 ;GO:0020037 ;GO:0005506	CYP	CYP
Zoff369140	D	367	0	0	0	0	0	0	0	0	0	1	0	0	0	0	0	0	0	0	0	0	0	0.05	0	0	0	0	0	0.0166667	gi|667729627|gb|KFA70354.1|	hypothetical protein S40285_01749 [Stachybotrys chlorohalonata IBT 40285]	cpw:CPC735_039330	Cytochrome P450 family protein	--	--	sp|Q4WAW5|FTMC_ASPFU	Tryprostatin B 6-hydroxylase OS=Neosartorya fumigata (strain ATCC MYA-4609 / Af293 / CBS 101355 / FGSC A1100) GN=ftmP450-1 PE=3 SV=2	GO:0055114 ;GO:0016705 ;GO:0005741 ;GO:0004497 ;GO:0044425 ;GO:0020037 ;GO:0005506	CYP	CYP
Zoff369229	A	636	0	0	0	0	0	0	0	2	1	6	0	0	0	0	0	0	0	0	0	0.1	0.05	0.3	0	0	0	0	0.05	0.1	gi|302885732|ref|XP_003041757.1|	hypothetical protein NECHADRAFT_53126 [Nectria haematococca mpVI 77-13-4]	fgr:FG08191.1	hypothetical protein	Hs13929429	[Q] KOG0684 Cytochrome P450	sp|Q64505|CP7A1_MOUSE	Cholesterol 7-alpha-monooxygenase OS=Mus musculus GN=Cyp7a1 PE=2 SV=2	GO:0016491 ;GO:0005488	CYP7A	CYP7
Zoff370969	B	394	2.75	0	3	0	0	0	0	0	0	0	0	0	0.14	0	0.15	0	0	0	0	0	0	0	0	0	0.0966667	0	0	0	gi|660960155|gb|KEP46947.1|	cytochrome P450 family protein [Rhizoctonia solani 123E]	cci:CC1G_11452	cytochrome P450	--	--	sp|B8NHY4|ORDA_ASPFN	O-methylsterigmatocystin oxidoreductase OS=Aspergillus flavus (strain ATCC 200026 / FGSC A1120 / NRRL 3357 / JCM 12722 / SRRC 167) GN=ordA PE=2 SV=1	GO:0055114 ;GO:0016705 ;GO:0004497 ;GO:0000166 ;GO:0020037 ;GO:0006812 ;GO:0016787 ;GO:0005506	CYP	CYP
Zoff371122	A	478	1	0	0	0	2	0	0	0	0	0	0	3	0.05	0	0	0	0.1	0	0	0	0	0	0	0.15	0.0166667	0.0333333	0	0.05	gi|330793567|ref|XP_003284855.1|	cytochrome P450 family protein [Dictyostelium purpureum]	ddi:DDB_G0279403	CYP51; cytochrome P450 family protein; K05917 cytochrome P450, family 51 (sterol 14-demethylase) [EC:1.14.13.70]	At1g11680	[Q] KOG0684 Cytochrome P450	sp|Q1ZXH9|CP51_DICDI	Probable lanosterol 14-alpha demethylase OS=Dictyostelium discoideum GN=cyp51 PE=3 SV=1	GO:0006629 ;GO:1901576 ;GO:0016491 ;GO:0044711 ;GO:1901360	CYP51	CYP51
Zoff371200	B	454	1	0	0	0	1	1	0	0	0	0	0	0	0.05	0	0	0	0.05	0.05	0	0	0	0	0	0	0.0166667	0.0333333	0	0	gi|639560512|gb|KDN38299.1|	hypothetical protein RSAG8_09598, partial [Rhizoctonia solani AG-8 WAC10335]	lbc:LACBIDRAFT_190903	hypothetical protein	At4g13770	[Q] KOG0156 Cytochrome P450 CYP2 subfamily	sp|A1DA63|FTME_NEOFI	Fumitremorgin C synthase OS=Neosartorya fischeri (strain ATCC 1020 / DSM 3700 / FGSC A1164 / NRRL 181) GN=ftmP450-2 PE=3 SV=1	GO:0020037 ;GO:0016705 ;GO:0004497 ;GO:0005506 ;GO:0055114	CYP2	CYP2
Zoff371327	C	757	0	0	0	0	0	0	0	0	0	17	0	0	0	0	0	0	0	0	0	0	0	0.86	0	0	0	0	0	0.286667	gi|3914161|sp|Q00616.1|NOR1_CYLTO	RecName: Full=Cytochrome P450 55A2; AltName: Full=Cytochrome P450NOR1 [Fusarium lichenicola]	pan:PODANSg1411	hypothetical protein	CE08839	[Q] KOG0156 Cytochrome P450 CYP2 subfamily	sp|Q00616|NOR1_CYLTO	Cytochrome P450 55A2 OS=Cylindrocarpon tonkinense GN=CYP55A2 PE=3 SV=1	GO:0020037 ;GO:0016705 ;GO:0004497 ;GO:0005506 ;GO:0055114	CYP55A	CYP55
Zoff371410	D	414	0	0	1	0	0	0	0	0	1	0	0	0	0	0	0.05	0	0	0	0	0	0.05	0	0	0	0.0166667	0	0.0166667	0	gi|695080751|ref|XP_009387856.1|	PREDICTED: cytochrome P450 78A1-like [Musa acuminata subsp. malaccensis]	sbi:SORBI_01g022690	hypothetical protein	At5g09970	[Q] KOG0156 Cytochrome P450 CYP2 subfamily	sp|Q7Y1V5|C78AB_ORYSJ	Cytochrome P450 78A11 OS=Oryza sativa subsp. japonica GN=CYP78A11 PE=1 SV=2	GO:0048445 ;GO:0016021 ;GO:0055114 ;GO:0010075 ;GO:0009055 ;GO:0010229 ;GO:0044550 ;GO:0051781 ;GO:0048504 ;GO:0048366 ;GO:0020037 ;GO:0016709 ;GO:0005506	CYP78A	CYP78
Zoff371502	B	801	0	0	0	0	0	15	0	0	0	0	0	0	0	0	0	0	0	0.74	0	0	0	0	0	0	0	0.246667	0	0	gi|695415557|ref|XP_009526595.1|	hypothetical protein PHYSODRAFT_499752 [Phytophthora sojae]	pif:PITG_14013	cytochrome P450, putative	At4g00360	[QI] KOG0157 Cytochrome P450 CYP4/CYP19/CYP26 subfamilies	sp|O23066|C86A2_ARATH	Cytochrome P450 86A2 OS=Arabidopsis thaliana GN=CYP86A2 PE=1 SV=1	GO:0046872 ;GO:0016491	CYP86A	CYP86
Zoff371889	B	357	0	0	0	0	0	0	0	0	0	2	0	0	0	0	0	0	0	0	0	0	0	0.1	0	0	0	0	0	0.0333333	gi|666867842|gb|KEZ44212.1|	Eburicol 14-alpha-demethylase [Scedosporium apiospermum]	fgr:FG01000.1	hypothetical protein; K05917 cytochrome P450, family 51 (sterol 14-demethylase) [EC:1.14.13.70]	YHR007c	[Q] KOG0684 Cytochrome P450	sp|O14442|CP51_UNCNE	Eburicol 14-alpha-demethylase OS=Uncinula necator GN=CYP51 PE=2 SV=2	GO:0008398 ;GO:0070988 ;GO:0005506 ;GO:0020037 ;GO:0006696 ;GO:0032259 ;GO:0008168 ;GO:0005783 ;GO:0055114	CYP51	CYP51
Zoff372436	B	931	0	0	10	0	0	0	0	0	0	0	0	0	0	0	0.5	0	0	0	0	0	0	0	0	0	0.166667	0	0	0	gi|628314008|ref|XP_007741486.1|	hypothetical protein A1O5_02682 [Cladophialophora psammophila CBS 110553]	mgr:MGG_08795	MG08795.4; hypothetical protein	7299831	[Q] KOG0158 Cytochrome P450 CYP3/CYP5/CYP6/CYP9 subfamilies	sp|Q9V4U7|C6A14_DROME	Probable cytochrome P450 6a14 OS=Drosophila melanogaster GN=Cyp6a14 PE=3 SV=2	GO:0046872 ;GO:0016491	CYP6A	CYP6
Zoff372458	D	459	0	0	0	2	0	0	0	0	0	0	0	0	0	0	0	0.1	0	0	0	0	0	0	0	0	0	0.0333333	0	0	gi|639555847|gb|KDN34255.1|	hypothetical protein RSAG8_12664, partial [Rhizoctonia solani AG-8 WAC10335]	mpr:MPER_02932	hypothetical protein ; K05917 cytochrome P450, family 51 (sterol 14-demethylase) [EC:1.14.13.70]	SPAC13A11.02c	[Q] KOG0684 Cytochrome P450	sp|P49602|CP51_USTMA	Lanosterol 14-alpha demethylase OS=Ustilago maydis (strain 521 / FGSC 9021) GN=ERG11 PE=3 SV=1	GO:0020037 ;GO:0016705 ;GO:0004497 ;GO:0005506 ;GO:0032259 ;GO:0055114 ;GO:0008168	CYP51A	CYP51
Zoff372611	A	571	0	0	0	1	1	0	0	1	0	0	0	0	0	0	0	0.05	0.05	0	0	0.05	0	0	0	0	0	0.0333333	0.0166667	0	gi|656906431|gb|KEF52174.1|	hypothetical protein A1O9_11801 [Exophiala aquamarina CBS 119918]	mgr:MGG_04469	MG04469.4; hypothetical protein	At2g45510	[QI] KOG0157 Cytochrome P450 CYP4/CYP19/CYP26 subfamilies	sp|Q64464|CP3AD_MOUSE	Cytochrome P450 3A13 OS=Mus musculus GN=Cyp3a13 PE=2 SV=1	GO:0020037 ;GO:0016705 ;GO:0004497 ;GO:0005506 ;GO:0055114	CYP4D	CYP4
Zoff373816	B	518	2	1	15	74	7	17	6	5	0	160	1	9	0.1	0.06	0.74	3.75	0.36	0.84	0.3	0.25	0	8.09	0.05	0.45	0.3	1.65	0.183333	2.86333	gi|403399730|sp|E3W9C4.1|C71A1_ZINZE	RecName: Full=Alpha-humulene 10-hydroxylase [Zingiber zerumbet]	vvi:100263449	hypothetical protein LOC100263449	At3g26220	[Q] KOG0156 Cytochrome P450 CYP2 subfamily	sp|E3W9C4|C71A1_ZINZE	Alpha-humulene 10-hydroxylase OS=Zingiber zerumbet GN=CYP71BA1 PE=1 SV=1	GO:0016705 ;GO:0004497 ;GO:0005488	CYP71B	CYP71
Zoff374282	A	387	0	0	0	0	2	0	0	2	0	0	0	0	0	0	0	0	0.1	0	0	0.1	0	0	0	0	0	0.0333333	0.0333333	0	gi|628324608|ref|XP_007743138.1|	hypothetical protein A1O5_04341 [Cladophialophora psammophila CBS 110553]	ncr:NCU11242	similar to cytochrome P450	Hs19743565	[Q] KOG0156 Cytochrome P450 CYP2 subfamily	sp|B8NHY4|ORDA_ASPFN	O-methylsterigmatocystin oxidoreductase OS=Aspergillus flavus (strain ATCC 200026 / FGSC A1120 / NRRL 3357 / JCM 12722 / SRRC 167) GN=ordA PE=2 SV=1	GO:0016709 ;GO:0046872	CYP	CYP
Zoff374374	A	358	0	0	0	0	0	0	0	1	1	0	0	0	0	0	0	0	0	0	0	0.05	0.05	0	0	0	0	0	0.0333333	0	gi|471869992|emb|CCO37023.1|	NADPH-ferrihemoprotein reductase [Rhizoctonia solani AG-1 IB]	afm:AFUA_3G09220	P450 family fatty acid hydroxylase (EC:1.14.14.-); K14338 cytochrome P450 / NADPH-cytochrome P450 reductase [EC:1.14.14.1 1.6.2.4]	At5g24910	[QI] KOG0157 Cytochrome P450 CYP4/CYP19/CYP26 subfamilies	sp|Q9Y8G7|C505_FUSOX	Bifunctional P-450:NADPH-P450 reductase OS=Fusarium oxysporum GN=CYP505 PE=1 SV=1	GO:0003958 ;GO:0005506 ;GO:0010181 ;GO:0020037 ;GO:0008270 ;GO:0070330 ;GO:0055114	CYP505	CYP505
Zoff374452	A	1496	0	1	0	0	0	0	0	0	0	23	0	0	0	0.06	0	0	0	0	0	0	0	1.16	0	0	0.02	0	0	0.386667	gi|587700656|gb|EWZ47261.1|	hypothetical protein FOZG_03209 [Fusarium oxysporum Fo47]	ani:AN8411.2	hypothetical protein	CE01660	[Q] KOG0158 Cytochrome P450 CYP3/CYP5/CYP6/CYP9 subfamilies	sp|P30607|CP52B_CANTR	Cytochrome P450 52A2 OS=Candida tropicalis GN=CYP52A2 PE=1 SV=1	GO:0020037 ;GO:0016712 ;GO:0005506 ;GO:0055114	CYP52A	CYP52
Zoff374704	B	463	0	0	0	0	3	0	0	2	0	0	0	0	0	0	0	0	0.16	0	0	0.1	0	0	0	0	0	0.0533333	0.0333333	0	gi|258567096|ref|XP_002584292.1|	conserved hypothetical protein [Uncinocarpus reesii 1704]	ure:UREG_04981	hypothetical protein	At3g19270	[QI] KOG0157 Cytochrome P450 CYP4/CYP19/CYP26 subfamilies	sp|Q9LJK2|ABAH4_ARATH	Abscisic acid 8'-hydroxylase 4 OS=Arabidopsis thaliana GN=CYP707A4 PE=2 SV=2	GO:0020037 ;GO:0016705 ;GO:0004497 ;GO:0005506 ;GO:0055114	CYP707A	CYP707
Zoff376375	A	313	0	2	0	0	1	0	0	0	0	0	0	0	0	0.11	0	0	0.05	0	0	0	0	0	0	0	0.0366667	0.0166667	0	0	gi|628339105|ref|XP_007746882.1|	hypothetical protein A1O5_08107 [Cladophialophora psammophila CBS 110553]	fgr:FG11389.1	hypothetical protein	Hs19743565	[Q] KOG0156 Cytochrome P450 CYP2 subfamily	sp|B8NHY4|ORDA_ASPFN	O-methylsterigmatocystin oxidoreductase OS=Aspergillus flavus (strain ATCC 200026 / FGSC A1120 / NRRL 3357 / JCM 12722 / SRRC 167) GN=ordA PE=2 SV=1	GO:0020037 ;GO:0016705 ;GO:0004497 ;GO:0005506 ;GO:0055114	CYP	CYP
Zoff377144	A	575	0	0	0	0	0	0	0	0	0	9	0	0	0	0	0	0	0	0	0	0	0	0.46	0	0	0	0	0	0.153333	gi|591423426|gb|EXL58563.1|	hypothetical protein FOCG_02073 [Fusarium oxysporum f. sp. radicis-lycopersici 26381]	fgr:FG09195.1	hypothetical protein	At2g17330	[Q] KOG0684 Cytochrome P450	sp|Q4WAX0|FTMG_ASPFU	Fumitremorgin C monooxygenase OS=Neosartorya fumigata (strain ATCC MYA-4609 / Af293 / CBS 101355 / FGSC A1100) GN=ftmP450-3 PE=3 SV=1	GO:0020037 ;GO:0016705 ;GO:0004497 ;GO:0005506 ;GO:0055114	CYP	CYP
Zoff377206	C	1698	1	0	26	0	0	0	0	0	0	1	0	0	0.05	0	1.29	0	0	0	0	0	0	0.05	0	0	0.446667	0	0	0.0166667	gi|682274229|gb|KFX97231.1|	hypothetical protein V490_02900 [Pseudogymnoascus pannorum VKM F-3557]	nfi:NFIA_113870	n-alkane-inducible cytochrome P450	At2g44890	[QI] KOG0157 Cytochrome P450 CYP4/CYP19/CYP26 subfamilies	sp|P30607|CP52B_CANTR	Cytochrome P450 52A2 OS=Candida tropicalis GN=CYP52A2 PE=1 SV=1	GO:0020037 ;GO:0016705 ;GO:0005506 ;GO:0055114 ;GO:0020037 ;GO:0016705 ;GO:0005506 ;GO:0055114	CYP52A	CYP52
Zoff377499	A	1688	1	0	0	0	0	0	1	0	1	45	0	0	0.05	0	0	0	0	0	0.05	0	0.05	2.28	0	0	0.0166667	0	0.0333333	0.76	gi|587709279|gb|EWZ80616.1|	hypothetical protein FOWG_15328 [Fusarium oxysporum f. sp. lycopersici MN25]	fgr:FG11282.1	hypothetical protein	At4g37340	[Q] KOG0156 Cytochrome P450 CYP2 subfamily	sp|Q701P2|KO1_GIBIN	Ent-kaurene oxidase OS=Gibberella intermedia GN=CYP503A1 PE=1 SV=1	GO:0020037 ;GO:0016705 ;GO:0004497 ;GO:0005506 ;GO:0055114	CYP503A	CYP503
Zoff377896	B	638	3	1	0	0	0	0	0	0	0	0	0	0	0.15	0.06	0	0	0	0	0	0	0	0	0	0	0.07	0	0	0	gi|471889290|emb|CCO32688.1|	Cytochrome P450 52A3 [Rhizoctonia solani AG-1 IB]	cci:CC1G_08233	cytochrome P450 monooxygenase pc-3	At1g24540	[QI] KOG0157 Cytochrome P450 CYP4/CYP19/CYP26 subfamilies	sp|P16496|CP52C_CANMA	Cytochrome P450 52A3-A OS=Candida maltosa GN=CYP52A3-A PE=1 SV=3	GO:0020037 ;GO:0016705 ;GO:0004497 ;GO:0005506 ;GO:0055114	CYP52A	CYP52
Zoff379506	A	499	0	0	0	0	0	0	0	0	0	2	0	0	0	0	0	0	0	0	0	0	0	0.1	0	0	0	0	0	0.0333333	gi|302906088|ref|XP_003049402.1|	hypothetical protein NECHADRAFT_45102 [Nectria haematococca mpVI 77-13-4]	fgr:FG10629.1	hypothetical protein	CE06222	[Q] KOG0156 Cytochrome P450 CYP2 subfamily	sp|P79152|CP3AJ_CAPHE	Cytochrome P450 3A19 (Fragment) OS=Capra hircus aegagrus GN=CYP3A19 PE=2 SV=1	GO:0020037 ;GO:0016705 ;GO:0004497 ;GO:0005506 ;GO:0055114	CYP3A	CYP3
Zoff379553	B	365	3	0	1	0	0	0	0	0	0	0	0	0	0.15	0	0.05	0	0	0	0	0	0	0	0	0	0.0666667	0	0	0	gi|660959468|gb|KEP46637.1|	cytochrome P450 family protein [Rhizoctonia solani 123E]	cci:CC1G_11454	cytochrome P450	--	--	sp|B8NHY4|ORDA_ASPFN	O-methylsterigmatocystin oxidoreductase OS=Aspergillus flavus (strain ATCC 200026 / FGSC A1120 / NRRL 3357 / JCM 12722 / SRRC 167) GN=ordA PE=2 SV=1	GO:0046872 ;GO:0097159 ;GO:0044699 ;GO:0016491 ;GO:1901363	CYP	CYP
Zoff379678	B	740	7	0	0	0	0	0	0	0	0	0	0	0	0.34	0	0	0	0	0	0	0	0	0	0	0	0.113333	0	0	0	gi|260823544|ref|XP_002604243.1|	hypothetical protein BRAFLDRAFT_73418 [Branchiostoma floridae]	bfo:BRAFLDRAFT_73418	hypothetical protein	Hs18491008	[Q] KOG0156 Cytochrome P450 CYP2 subfamily	sp|O54749|CP2J5_MOUSE	Cytochrome P450 2J5 OS=Mus musculus GN=Cyp2j5 PE=2 SV=1	--	CYP2J	CYP2
Zoff380434	A	452	1	0	0	0	2	0	1	2	0	0	0	0	0.05	0	0	0	0.1	0	0.05	0.1	0	0	0	0	0.0166667	0.0333333	0.05	0	gi|628339105|ref|XP_007746882.1|	hypothetical protein A1O5_08107 [Cladophialophora psammophila CBS 110553]	pan:PODANSg1446	hypothetical protein	--	--	sp|Q4WAW8|FTME_ASPFU	Fumitremorgin C synthase OS=Neosartorya fumigata (strain ATCC MYA-4609 / Af293 / CBS 101355 / FGSC A1100) GN=ftmP450-2 PE=3 SV=1	GO:0016491 ;GO:0005488	CYP2	CYP2
Zoff380679	C	530	0	0	3	0	0	0	0	0	0	1	0	0	0	0	0.15	0	0	0	0	0	0	0.05	0	0	0.05	0	0	0.0166667	gi|452843086|gb|EME45021.1|	hypothetical protein DOTSEDRAFT_33623 [Dothistroma septosporum NZE10]	ang:ANI_1_602114	An13g01350; sterigmatocystin biosynthesis P450 monooxygenase STCB	--	--	sp|Q12608|STCB_EMENI	Probable sterigmatocystin biosynthesis P450 monooxygenase STCB OS=Emericella nidulans (strain FGSC A4 / ATCC 38163 / CBS 112.46 / NRRL 194 / M139) GN=stcB PE=3 SV=2	GO:0016491 ;GO:0008202 ;GO:0005488	CYP	CYP
Zoff381228	C	640	0	0	0	0	0	0	0	0	0	3	0	1	0	0	0	0	0	0	0	0	0	0.15	0	0.05	0	0	0	0.0666667	gi|701778400|gb|KGQ11964.1|	Eburicol 14-alpha-demethylase [Beauveria bassiana D1-5]	ncr:NCU02624	cytochrome P450 51; K05917 cytochrome P450, family 51 (sterol 14-demethylase) [EC:1.14.13.70]	SPAC13A11.02c	[Q] KOG0684 Cytochrome P450	sp|O14442|CP51_UNCNE	Eburicol 14-alpha-demethylase OS=Uncinula necator GN=CYP51 PE=2 SV=2	GO:0008398 ;GO:0070988 ;GO:0005506 ;GO:0020037 ;GO:0006696 ;GO:0032259 ;GO:0008168 ;GO:0005783 ;GO:0055114	CYP51	CYP51
Zoff381386	C	399	2	0	1	0	0	1	0	0	1	0	0	0	0.1	0	0.05	0	0	0.05	0	0	0.05	0	0	0	0.05	0.0166667	0.0166667	0	gi|576994853|gb|EUC67445.1|	cytochrome P450 family protein, putative [Rhizoctonia solani AG-3 Rhs1AP]	act:ACLA_093640	Cytochrome P450 oxidoreductase, putative	At2g45560	[Q] KOG0156 Cytochrome P450 CYP2 subfamily	sp|P37117|C71A4_SOLME	Cytochrome P450 71A4 OS=Solanum melongena GN=CYP71A4 PE=2 SV=1	GO:0046872 ;GO:0016491	CYP71A	CYP71
Zoff381391	D	466	0	0	0	0	0	0	2	0	1	0	0	0	0	0	0	0	0	0	0.1	0	0.05	0	0	0	0	0	0.05	0	gi|471916580|emb|CCO26156.1|	hypothetical protein BN14_00173 [Rhizoctonia solani AG-1 IB]	lbc:LACBIDRAFT_187166	ERG5; cytochrome P450 sterol C22-desaturase; K09831 C-22 sterol desaturase [EC:1.14.14.-]	SPAC19A8.04	[QI] KOG0157 Cytochrome P450 CYP4/CYP19/CYP26 subfamilies	sp|O13820|ERG5_SCHPO	Cytochrome P450 61 OS=Schizosaccharomyces pombe (strain 972 / ATCC 24843) GN=erg5 PE=1 SV=3	GO:0004497 ;GO:0005506 ;GO:0020037 ;GO:0005524 ;GO:0016705 ;GO:0055114	CYP61	CYP61
Zoff381751	C	436	0	0	0	0	0	0	0	0	0	0	0	3	0	0	0	0	0	0	0	0	0	0	0	0.15	0	0	0	0.05	gi|397626146|gb|EJK68048.1|	hypothetical protein THAOC_10819 [Thalassiosira oceanica]	tps:THAPSDRAFT_263399	hypothetical protein	At5g45340	[QI] KOG0157 Cytochrome P450 CYP4/CYP19/CYP26 subfamilies	sp|O93323|CP26A_XENLA	Cytochrome P450 26A1 OS=Xenopus laevis GN=cyp26a1 PE=2 SV=1	--	CYP26A	CYP26
Zoff382127	A	577	62	48	29	153	108	69	75	104	125	194	19	58	3.05	2.76	1.44	7.76	5.58	3.41	3.69	5.21	6.17	9.81	0.94	2.92	2.41667	5.58333	5.02333	4.55667	gi|695015843|ref|XP_009394812.1|	PREDICTED: cytochrome P450 72A15-like [Musa acuminata subsp. malaccensis]	sbi:SORBI_03g028650	hypothetical protein	At3g14680	[QI] KOG0157 Cytochrome P450 CYP4/CYP19/CYP26 subfamilies	sp|Q9LUC6|C7A14_ARATH	Cytochrome P450 72A14 OS=Arabidopsis thaliana GN=CYP72A14 PE=2 SV=1	GO:0020037 ;GO:0016705 ;GO:0004497 ;GO:0005506 ;GO:0055114	CYP72A	CYP72
Zoff382566	B	444	0	0	0	1	0	5	0	0	0	0	0	0	0	0	0	0.05	0	0.25	0	0	0	0	0	0	0	0.1	0	0	gi|568018029|gb|ETL92206.1|	hypothetical protein L917_09428, partial [Phytophthora parasitica]	pif:PITG_07722	cytochrome P450, putative	At2g45510	[QI] KOG0157 Cytochrome P450 CYP4/CYP19/CYP26 subfamilies	sp|P48422|C86A1_ARATH	Cytochrome P450 86A1 OS=Arabidopsis thaliana GN=CYP86A1 PE=1 SV=2	--	CYP86A	CYP86
Zoff382604	A	477	0	0	5	0	1	0	0	0	0	0	0	2	0	0	0.25	0	0.05	0	0	0	0	0	0	0.1	0.0833333	0.0166667	0	0.0333333	gi|656910740|gb|KEF56399.1|	hypothetical protein A1O9_07980 [Exophiala aquamarina CBS 119918]	fgr:FG02419.1	hypothetical protein	At3g20950	[Q] KOG0156 Cytochrome P450 CYP2 subfamily	sp|Q12645|PID9_FUSSO	Pisatin demethylase OS=Fusarium solani subsp. pisi GN=PDAT9 PE=3 SV=1	GO:0020037 ;GO:0016705 ;GO:0004497 ;GO:0005506 ;GO:0055114	CYP	CYP
Zoff383924	C	518	3	0	1	0	0	0	0	0	0	0	0	0	0.15	0	0.05	0	0	0	0	0	0	0	0	0	0.0666667	0	0	0	gi|639568597|gb|KDN46038.1|	hypothetical protein RSAG8_04545, partial [Rhizoctonia solani AG-8 WAC10335]	lbc:LACBIDRAFT_251026	hypothetical protein	At4g13770	[Q] KOG0156 Cytochrome P450 CYP2 subfamily	sp|P48421|C83A1_ARATH	Cytochrome P450 83A1 OS=Arabidopsis thaliana GN=CYP83A1 PE=1 SV=2	GO:0046872 ;GO:0016491	CYP83A	CYP83
Zoff386425	D	616	1	2	0	0	4	5	0	0	0	1	0	0	0.05	0.11	0	0	0.21	0.25	0	0	0	0.05	0	0	0.0533333	0.153333	0	0.0166667	gi|640925237|gb|KDN69151.1|	putative cytochrome P450 [Colletotrichum sublineola]	pan:PODANSg1285	hypothetical protein	Hs13435391	[QI] KOG0157 Cytochrome P450 CYP4/CYP19/CYP26 subfamilies	sp|O13317|TRI11_FUSSP	Isotrichodermin C-15 hydroxylase OS=Fusarium sporotrichioides GN=TRI11 PE=3 SV=1	GO:0046872 ;GO:0016491	CYP	CYP
Zoff386426	A	1030	4	1	0	1	3	3	0	3	0	1	0	0	0.2	0.06	0	0.05	0.16	0.15	0	0.15	0	0.05	0	0	0.0866667	0.12	0.05	0.0166667	gi|682271728|gb|KFX95463.1|	hypothetical protein V490_03843 [Pseudogymnoascus pannorum VKM F-3557]	pcs:Pc13g06690	Pc13g06690	7301593	[Q] KOG0158 Cytochrome P450 CYP3/CYP5/CYP6/CYP9 subfamilies	sp|Q12609|STCF_EMENI	Probable sterigmatocystin biosynthesis P450 monooxygenase stcF OS=Emericella nidulans (strain FGSC A4 / ATCC 38163 / CBS 112.46 / NRRL 194 / M139) GN=stcF PE=3 SV=3	GO:0003824	CYP60A	CYP60
Zoff386509	A	457	0	0	0	0	0	0	0	0	0	2	0	0	0	0	0	0	0	0	0	0	0	0.1	0	0	0	0	0	0.0333333	gi|116214437|ref|XP_001230235.1|	hypothetical protein CHGG_11059 [Chaetomium globosum CBS 148.51]	afv:AFLA_074170	cytochrome P450, putative	--	--	--	--	GO:0016491 ;GO:0005488	CYP	CYP
Zoff390000	B	433	0	0	0	0	0	2	0	0	0	0	0	0	0	0	0	0	0	0.1	0	0	0	0	0	0	0	0.0333333	0	0	gi|566022808|gb|ETI45719.1|	hypothetical protein F443_09786, partial [Phytophthora parasitica P1569]	pif:PITG_14013	cytochrome P450, putative	At1g63710	[QI] KOG0157 Cytochrome P450 CYP4/CYP19/CYP26 subfamilies	sp|Q9CAD6|C86A7_ARATH	Cytochrome P450 86A7 OS=Arabidopsis thaliana GN=CYP86A7 PE=2 SV=1	GO:0016491 ;GO:0005488	CYP86A	CYP86
Zoff391999	A	472	0	0	0	0	0	0	0	0	0	5	0	0	0	0	0	0	0	0	0	0	0	0.25	0	0	0	0	0	0.0833333	gi|302889435|ref|XP_003043603.1|	hypothetical protein NECHADRAFT_54819 [Nectria haematococca mpVI 77-13-4]	fgr:FG03008.1	hypothetical protein	At5g57220	[Q] KOG0156 Cytochrome P450 CYP2 subfamily	sp|P38364|PID6_FUSSO	Pisatin demethylase OS=Fusarium solani subsp. pisi GN=PDA6-1 PE=3 SV=1	GO:0020037 ;GO:0016705 ;GO:0004497 ;GO:0005506 ;GO:0032259 ;GO:0055114 ;GO:0008168	CYP	CYP
Zoff392663	B	572	0	0	3	0	0	1	0	0	0	0	0	0	0	0	0.15	0	0	0.05	0	0	0	0	0	0	0.05	0.0166667	0	0	gi|576992404|gb|EUC65084.1|	cytochrome P450 family protein, partial [Rhizoctonia solani AG-3 Rhs1AP]	cci:CC1G_11454	cytochrome P450	--	--	sp|B8NHY4|ORDA_ASPFN	O-methylsterigmatocystin oxidoreductase OS=Aspergillus flavus (strain ATCC 200026 / FGSC A1120 / NRRL 3357 / JCM 12722 / SRRC 167) GN=ordA PE=2 SV=1	GO:0016491 ;GO:0005488	CYP	CYP
Zoff393334	A	434	0	0	0	0	0	0	0	0	0	0	0	5	0	0	0	0	0	0	0	0	0	0	0	0.25	0	0	0	0.0833333	gi|572301682|ref|XP_006616884.1|	PREDICTED: cytochrome P450 4C1-like [Apis dorsata]	--	--	CE16783	[Q] KOG0156 Cytochrome P450 CYP2 subfamily	sp|Q6WNQ8|C81E8_MEDTR	Cytochrome P450 81E8 OS=Medicago truncatula GN=CYP81E8 PE=2 SV=1	--	CYP81E	CYP81
Zoff393974	C	592	0	1	0	0	0	3	0	0	0	0	0	0	0	0.06	0	0	0	0.15	0	0	0	0	0	0	0.02	0.05	0	0	gi|576993815|gb|EUC66481.1|	cytochrome P450 family monooxygenase [Rhizoctonia solani AG-3 Rhs1AP]	cci:CC1G_05498	cytochrome P450 monooxygenase pc-3	At1g57750	[QI] KOG0157 Cytochrome P450 CYP4/CYP19/CYP26 subfamilies	sp|P16496|CP52C_CANMA	Cytochrome P450 52A3-A OS=Candida maltosa GN=CYP52A3-A PE=1 SV=3	GO:0020037 ;GO:0016705 ;GO:0004497 ;GO:0005506 ;GO:0055114	CYP52A	CYP52
Zoff394356	A	331	2	0	0	0	0	0	0	0	0	0	0	0	0.1	0	0	0	0	0	0	0	0	0	0	0	0.0333333	0	0	0	gi|675388676|gb|KFM81573.1|	Cytochrome P450 3A29, partial [Stegodyphus mimosarum]	cin:100169893	cytochrome P450 CYP3-like member 2	7304257	[Q] KOG0158 Cytochrome P450 CYP3/CYP5/CYP6/CYP9 subfamilies	sp|Q9V4I0|CP9B1_DROME	Cytochrome P450 9b1 OS=Drosophila melanogaster GN=Cyp9b1 PE=2 SV=1	GO:0016491 ;GO:0005488	CYP3A	CYP3
Zoff395205	C	376	0	0	0	0	0	0	0	0	0	0	0	1	0	0	0	0	0	0	0	0	0	0	0	0.05	0	0	0	0.0166667	gi|389635307|ref|XP_003715306.1|	NADPH-cytochrome P450 reductase, variant [Magnaporthe oryzae 70-15]	mgr:MGG_07117	MG07117.4; hypothetical protein; K00327 NADPH-ferrihemoprotein reductase [EC:1.6.2.4]	SPBC365.17	[C] KOG1158 NADP/FAD dependent oxidoreductase	sp|Q4WM67|NCPR_ASPFU	NADPH--cytochrome P450 reductase OS=Neosartorya fumigata (strain ATCC MYA-4609 / Af293 / CBS 101355 / FGSC A1100) GN=cprA PE=1 SV=1	GO:0005789 ;GO:0003958 ;GO:0005506 ;GO:0010181 ;GO:0055114	CYP	CYP
Zoff395658	A	1640	12	9	6	3	1	4	2	1	0	0	1	0	0.59	0.52	0.3	0.15	0.05	0.2	0.1	0.05	0	0	0.05	0	0.47	0.133333	0.05	0.0166667	gi|656908978|gb|KEF54688.1|	cytochrome P450 oxidoreductase [Exophiala aquamarina CBS 119918]	afm:AFUA_8G06450	Rieske 2Fe-2S family protein	--	--	sp|P0ABR7|YEAW_ECOLI	Putative dioxygenase subunit alpha YeaW OS=Escherichia coli (strain K12) GN=yeaW PE=3 SV=1	GO:0016708 ;GO:0019439 ;GO:0004497 ;GO:0005506 ;GO:0051537 ;GO:0055114	CYP	CYP
Zoff396427	B	874	0	0	0	0	0	0	0	0	0	5	0	0	0	0	0	0	0	0	0	0	0	0.25	0	0	0	0	0	0.0833333	gi|630041673|ref|XP_007841483.1|	hypothetical protein PFICI_14711 [Pestalotiopsis fici W106-1]	afv:AFLA_115900	benzoate 4-monooxygenase cytochrome P450, putative	At1g63710	[QI] KOG0157 Cytochrome P450 CYP4/CYP19/CYP26 subfamilies	sp|P38364|PID6_FUSSO	Pisatin demethylase OS=Fusarium solani subsp. pisi GN=PDA6-1 PE=3 SV=1	GO:0020037 ;GO:0016705 ;GO:0004497 ;GO:0005506 ;GO:0032259 ;GO:0055114 ;GO:0008168	CYP	CYP
Zoff397805	A	358	0	0	0	0	0	0	0	0	0	0	0	2	0	0	0	0	0	0	0	0	0	0	0	0.1	0	0	0	0.0333333	gi|156573419|gb|ABU85090.1|	cyp3a7 protein [Macaca mulatta]	mcc:100144394	CYP3A7; cytochrome P450, family 3, subfamily A, polypeptide 7 (EC:1.14.14.1); K07424 cytochrome P450, family 3, subfamily A [EC:1.14.14.1]	Hs4503233	[Q] KOG0158 Cytochrome P450 CYP3/CYP5/CYP6/CYP9 subfamilies	sp|P24462|CP3A7_HUMAN	Cytochrome P450 3A7 OS=Homo sapiens GN=CYP3A7 PE=1 SV=2	GO:0009056 ;GO:0006629 ;GO:0006805 ;GO:0004497 ;GO:0019825 ;GO:0044281 ;GO:0005789	CYP3A	CYP3
Zoff400686	C	574	1	0	0	0	0	0	0	0	1	0	0	0	0.05	0	0	0	0	0	0	0	0.05	0	0	0	0.0166667	0	0.0166667	0	gi|695074657|ref|XP_009384541.1|	PREDICTED: cytochrome P450 84A1-like [Musa acuminata subsp. malaccensis]	sbi:SORBI_01g017270	hypothetical protein; K09755 ferulate-5-hydroxylase [EC:1.14.-.-]	At4g36220	[Q] KOG0156 Cytochrome P450 CYP2 subfamily	sp|Q42600|C84A1_ARATH	Cytochrome P450 84A1 OS=Arabidopsis thaliana GN=CYP84A1 PE=1 SV=1	GO:0046872 ;GO:0016491	CYP84A	CYP84
Zoff400687	C	724	0	0	3	0	0	0	3	3	0	0	1	1	0	0	0.15	0	0	0	0.15	0.15	0	0	0.05	0.05	0.05	0	0.1	0.0333333	gi|695074657|ref|XP_009384541.1|	PREDICTED: cytochrome P450 84A1-like [Musa acuminata subsp. malaccensis]	pop:POPTR_836596	CAld5H/F5H1, CYP84A10; coniferylaldehyde 5- hydroxylase; K09755 ferulate-5-hydroxylase [EC:1.14.-.-]	At4g36220	[Q] KOG0156 Cytochrome P450 CYP2 subfamily	sp|Q42600|C84A1_ARATH	Cytochrome P450 84A1 OS=Arabidopsis thaliana GN=CYP84A1 PE=1 SV=1	GO:0046872 ;GO:0016491	CYP84A	CYP84
Zoff404134	A	2026	1	0	0	0	0	0	0	1	0	78.78	1	0	0.05	0	0	0	0	0	0	0.05	0	3.98	0.05	0	0.0166667	0	0.0166667	1.34333	gi|584146267|gb|EWG55521.1|	hypothetical protein FVEG_13512 [Fusarium verticillioides 7600]	fgr:FG02929.1	hypothetical protein	--	--	sp|O00061|CP67_UROFA	Cytochrome P450 67 (Fragment) OS=Uromyces fabae GN=CYP67 PE=2 SV=1	GO:0020037 ;GO:0016705 ;GO:0004497 ;GO:0005506 ;GO:0032259 ;GO:0055114 ;GO:0008168 ;GO:0020037 ;GO:0016705 ;GO:0004497 ;GO:0005506 ;GO:0032259 ;GO:0055114 ;GO:0008168	CYP67	CYP67
Zoff404865	A	490	0	0	0	0	0	0	0	0	0	0	0	3	0	0	0	0	0	0	0	0	0	0	0	0.15	0	0	0	0.05	gi|342319309|gb|EGU11258.1|	putative cytochrome P450 monooxygenase [Rhodotorula glutinis ATCC 204091]	smo:SELMODRAFT_101765	hypothetical protein	7304051	[QI] KOG0157 Cytochrome P450 CYP4/CYP19/CYP26 subfamilies	sp|Q9V4T5|CP4E1_DROME	Probable cytochrome P450 4e1 OS=Drosophila melanogaster GN=Cyp4e1 PE=2 SV=1	--	CYP4A	CYP4
Zoff405497	D	530	4	0	0	0	0	0	0	0	0	0	0	0	0.2	0	0	0	0	0	0	0	0	0	0	0	0.0666667	0	0	0	gi|321477329|gb|EFX88288.1|	hypothetical protein DAPPUDRAFT_311604 [Daphnia pulex]	isc:IscW_ISCW019198	cytochrome P450, putative (EC:1.14.13.67)	Hs4503229	[Q] KOG0158 Cytochrome P450 CYP3/CYP5/CYP6/CYP9 subfamilies	sp|Q964T2|CP9E2_BLAGE	Cytochrome P450 9e2 OS=Blattella germanica GN=CYP9E2 PE=2 SV=1	GO:0016705 ;GO:0004497 ;GO:0005488	CYP3A	CYP3
Zoff405718	A	330	0	0	0	0	0	0	0	0	0	0	0	1	0	0	0	0	0	0	0	0	0	0	0	0.05	0	0	0	0.0166667	gi|495101583|ref|WP_007826406.1|	cytochrome P450 [Streptomyces sp. Tu6071]	bfu:BC1G_11822	hypothetical protein	--	--	--	--	--	CYP4B	CYP4
Zoff407058	A	739	0	0	0	0	0	0	0	0	0	4	0	0	0	0	0	0	0	0	0	0	0	0.2	0	0	0	0	0	0.0666667	gi|587737252|gb|EXA34968.1|	hypothetical protein FOVG_13750 [Fusarium oxysporum f. sp. pisi HDV247]	pan:PODANSg1285	hypothetical protein	7299339	[Q] KOG0159 Cytochrome P450 CYP11/CYP12/CYP24/CYP27 subfamilies	sp|Q12609|STCF_EMENI	Probable sterigmatocystin biosynthesis P450 monooxygenase stcF OS=Emericella nidulans (strain FGSC A4 / ATCC 38163 / CBS 112.46 / NRRL 194 / M139) GN=stcF PE=3 SV=3	GO:0020037 ;GO:0016705 ;GO:0004497 ;GO:0005506 ;GO:0055114	CYP60A	CYP60
Zoff409295	C	495	0	0	0	0	0	0	0	0	0	0	0	0	0	0	0	0	0	0	0	0	0	0	0	0	0	0	0	0	gi|302888625|ref|XP_003043199.1|	hypothetical protein NECHADRAFT_72652 [Nectria haematococca mpVI 77-13-4]	aor:AOR_1_428154	AO090003000253; cytochrome P450 61; K00517 [EC:1.14.-.-]	YMR015c	[QI] KOG0157 Cytochrome P450 CYP4/CYP19/CYP26 subfamilies	sp|P54781|ERG5_YEAST	Cytochrome P450 61 OS=Saccharomyces cerevisiae (strain ATCC 204508 / S288c) GN=ERG5 PE=1 SV=1	GO:0000249 ;GO:0004497 ;GO:0005506 ;GO:0020037 ;GO:0006696 ;GO:0005783 ;GO:0055114	CYP61	CYP61
Zoff409296	C	495	0	0	0	0	0	0	0	0	0	6	0	0	0	0	0	0	0	0	0	0	0	0.3	0	0	0	0	0	0.1	gi|302888625|ref|XP_003043199.1|	hypothetical protein NECHADRAFT_72652 [Nectria haematococca mpVI 77-13-4]	aor:AOR_1_428154	AO090003000253; cytochrome P450 61; K00517 [EC:1.14.-.-]	YMR015c	[QI] KOG0157 Cytochrome P450 CYP4/CYP19/CYP26 subfamilies	sp|P54781|ERG5_YEAST	Cytochrome P450 61 OS=Saccharomyces cerevisiae (strain ATCC 204508 / S288c) GN=ERG5 PE=1 SV=1	GO:0000249 ;GO:0004497 ;GO:0005506 ;GO:0020037 ;GO:0006696 ;GO:0005783 ;GO:0055114	CYP61	CYP61
Zoff409451	A	717	9	0	3	0	0	0	0	0	0	0	0	0	0.44	0	0.15	0	0	0	0	0	0	0	0	0	0.196667	0	0	0	gi|660960155|gb|KEP46947.1|	cytochrome P450 family protein [Rhizoctonia solani 123E]	lbc:LACBIDRAFT_311267	potential P450 cytochrome	At4g31950	[Q] KOG0156 Cytochrome P450 CYP2 subfamily	sp|O13345|ORDA_ASPPA	O-methylsterigmatocystin oxidoreductase OS=Aspergillus parasiticus GN=ordA PE=1 SV=1	GO:0046872 ;GO:0016491	CYP	CYP
Zoff409936	C	564	0	0	0	2	0	8	0	0	0	0	0	0	0	0	0	0.1	0	0.4	0	0	0	0	0	0	0	0.166667	0	0	gi|570950279|gb|ETP15536.1|	hypothetical protein F441_09731, partial [Phytophthora parasitica CJ01A1]	pif:PITG_14018	cytochrome P450, putative	At4g00360	[QI] KOG0157 Cytochrome P450 CYP4/CYP19/CYP26 subfamilies	sp|O23066|C86A2_ARATH	Cytochrome P450 86A2 OS=Arabidopsis thaliana GN=CYP86A2 PE=1 SV=1	GO:0046872 ;GO:0016491	CYP86A	CYP86
Zoff410571	B	440	6	0	0	0	0	0	0	0	0	0	0	0	0.3	0	0	0	0	0	0	0	0	0	0	0	0.1	0	0	0	gi|291236059|ref|XP_002737962.1|	PREDICTED: cytochrome P450 1A1-like [Saccoglossus kowalevskii]	isc:IscW_ISCW022076	cytochrome P450, putative (EC:1.14.14.1)	Hs4503195	[Q] KOG0156 Cytochrome P450 CYP2 subfamily	sp|Q92113|CP17A_SQUAC	Steroid 17-alpha-hydroxylase/17,20 lyase OS=Squalus acanthias GN=CYP17A1 PE=2 SV=1	GO:0004497 ;GO:0016705	CYP1A	CYP1
Zoff411295	A	401	3	0	0	0	0	0	0	0	0	0	0	0	0.15	0	0	0	0	0	0	0	0	0	0	0	0.05	0	0	0	gi|576986815|gb|EUC59551.1|	cytochrome P450 family oxidoreductase [Rhizoctonia solani AG-3 Rhs1AP]	cci:CC1G_11452	cytochrome P450	CE25818	[Q] KOG0156 Cytochrome P450 CYP2 subfamily	sp|O13345|ORDA_ASPPA	O-methylsterigmatocystin oxidoreductase OS=Aspergillus parasiticus GN=ordA PE=1 SV=1	GO:0046872 ;GO:0016491	CYP	CYP
Zoff413065	C	392	0	0	0	0	0	0	1	0	0	0	0	0	0	0	0	0	0	0	0.05	0	0	0	0	0	0	0	0.0166667	0	gi|576992101|gb|EUC64781.1|	lanosterol 14-alpha-demethylase, partial [Rhizoctonia solani AG-3 Rhs1AP]	mpr:MPER_02932	hypothetical protein ; K05917 cytochrome P450, family 51 (sterol 14-demethylase) [EC:1.14.13.70]	SPAC13A11.02c	[Q] KOG0684 Cytochrome P450	sp|O14442|CP51_UNCNE	Eburicol 14-alpha-demethylase OS=Uncinula necator GN=CYP51 PE=2 SV=2	GO:0020037 ;GO:0016705 ;GO:0004497 ;GO:0005506 ;GO:0032259 ;GO:0055114 ;GO:0008168	CYP51	CYP51
Zoff413283	D	446	3	0	0	0	0	0	0	0	0	0	0	0	0.15	0	0	0	0	0	0	0	0	0	0	0	0.05	0	0	0	gi|628311405|ref|XP_007741147.1|	benzoate 4-monooxygenase [Cladophialophora psammophila CBS 110553]	ncr:NCU01086	benzoate 4-monooxygenase; K07824 benzoate 4-monooxygenase [EC:1.14.13.12]	Hs4503231	[Q] KOG0158 Cytochrome P450 CYP3/CYP5/CYP6/CYP9 subfamilies	sp|P17549|CP53_ASPNG	Benzoate 4-monooxygenase OS=Aspergillus niger GN=bphA PE=1 SV=1	GO:0020037 ;GO:0016705 ;GO:0004497 ;GO:0005506 ;GO:0055114	CYP	CYP
Zoff413465	A	322	0	0	0	0	2	0	0	1	0	0	0	0	0	0	0	0	0.1	0	0	0.05	0	0	0	0	0	0.0333333	0.0166667	0	gi|628339105|ref|XP_007746882.1|	hypothetical protein A1O5_08107 [Cladophialophora psammophila CBS 110553]	nfi:NFIA_094190	Cytochrome P450 oxidoreductase, putative	At2g45550	[Q] KOG0156 Cytochrome P450 CYP2 subfamily	sp|O64635|C76C4_ARATH	Cytochrome P450 76C4 OS=Arabidopsis thaliana GN=CYP76C4 PE=3 SV=1	GO:0020037 ;GO:0005506 ;GO:0009055 ;GO:0036202 ;GO:0047085 ;GO:0055114 ;GO:0050592	CYP76C	CYP76
Zoff413781	A	455	0	0	0	0	0	0	1	1	1	0	0	0	0	0	0	0	0	0	0.05	0.05	0.05	0	0	0	0	0	0.05	0	gi|471905990|emb|CCO28946.1|	cytochrome P450, family 51 (sterol 14-demethylase) [Rhizoctonia solani AG-1 IB]	cci:CC1G_08364	lanosterol 14-alpha-demethylase	YHR007c	[Q] KOG0684 Cytochrome P450	sp|P49602|CP51_USTMA	Lanosterol 14-alpha demethylase OS=Ustilago maydis (strain 521 / FGSC 9021) GN=ERG11 PE=3 SV=1	GO:0020037 ;GO:0008398 ;GO:0005506 ;GO:0032259 ;GO:0070988 ;GO:0055114 ;GO:0008168	CYP51A	CYP51
Zoff414179	B	518	0	0	0	0	0	11	0	0	0	0	0	0	0	0	0	0	0	0.54	0	0	0	0	0	0	0	0.18	0	0	gi|568048462|gb|ETM45513.1|	hypothetical protein L914_09460, partial [Phytophthora parasitica]	pif:PITG_14013	cytochrome P450, putative	At2g45970	[QI] KOG0157 Cytochrome P450 CYP4/CYP19/CYP26 subfamilies	sp|O80823|C86A8_ARATH	Cytochrome P450 86A8 OS=Arabidopsis thaliana GN=CYP86A8 PE=2 SV=1	--	CYP86A	CYP86
Zoff414923	A	572	6	0	0	0	0	0	0	0	0	0	0	0	0.3	0	0	0	0	0	0	0	0	0	0	0	0.1	0	0	0	gi|241671627|ref|XP_002400106.1|	cytochrome P-450 IIC4, putative [Ixodes scapularis]	isc:IscW_ISCW022069	cytochrome P-450 IIC4, putative (EC:1.14.14.1)	--	--	sp|Q92109|CP1A3_ONCMY	Cytochrome P450 1A3 OS=Oncorhynchus mykiss GN=cyp1a3 PE=2 SV=2	--	CYP1A	CYP1
Zoff414925	A	1018	0	0	0	11	3	0	0	1	1	0	0	0	0	0	0	0.56	0.16	0	0	0.05	0.05	0	0	0	0	0.24	0.0333333	0	gi|628218003|ref|XP_007719873.1|	hypothetical protein A1O1_00766 [Capronia coronata CBS 617.96]	cpw:CPC735_011130	Cytochrome P450 family protein	Hs4503233	[Q] KOG0158 Cytochrome P450 CYP3/CYP5/CYP6/CYP9 subfamilies	sp|Q12612|TRI4_FUSSP	Trichodiene oxygenase OS=Fusarium sporotrichioides GN=TRI4 PE=3 SV=1	GO:0005622 ;GO:0004497 ;GO:0005506 ;GO:0020037 ;GO:0016705 ;GO:0055114	CYP	CYP
Zoff416801	A	891	6	0	0	0	0	0	0	0	0	0	0	0	0.3	0	0	0	0	0	0	0	0	0	0	0	0.1	0	0	0	gi|260814319|ref|XP_002601863.1|	hypothetical protein BRAFLDRAFT_121141 [Branchiostoma floridae]	bfo:BRAFLDRAFT_121141	hypothetical protein	Hs4503199	[Q] KOG0156 Cytochrome P450 CYP2 subfamily	sp|Q5KQT7|CP1A1_FELCA	Cytochrome P450 1A1 OS=Felis catus GN=CYP1A1 PE=2 SV=1	GO:0016491	CYP1A	CYP1
Zoff417514	A	506	0	0	0	1	0	0	0	0	0	0	0	0	0	0	0	0.05	0	0	0	0	0	0	0	0	0	0.0166667	0	0	gi|628323040|ref|XP_007742831.1|	hypothetical protein A1O5_04032 [Cladophialophora psammophila CBS 110553]	aor:AOR_1_1174054	AO090011000685; toxin biosynthesis cytochrome P450 monooxygenase	--	--	sp|Q00707|STCL_EMENI	Versicolorin B desaturase OS=Emericella nidulans (strain FGSC A4 / ATCC 38163 / CBS 112.46 / NRRL 194 / M139) GN=stcL PE=1 SV=2	GO:0016491 ;GO:0005488	CYP	CYP
Zoff418387	A	738	1	3	0	2	0	1	0	0	0	0	0	0	0.05	0.17	0	0.1	0	0.05	0	0	0	0	0	0	0.0733333	0.05	0	0	gi|660963026|gb|KEP48557.1|	cytochrome P450 family protein [Rhizoctonia solani 123E]	scm:SCHCODRAFT_111698	hypothetical protein	At3g26150	[Q] KOG0156 Cytochrome P450 CYP2 subfamily	sp|B8NHY4|ORDA_ASPFN	O-methylsterigmatocystin oxidoreductase OS=Aspergillus flavus (strain ATCC 200026 / FGSC A1120 / NRRL 3357 / JCM 12722 / SRRC 167) GN=ordA PE=2 SV=1	GO:0046872 ;GO:0016491	CYP	CYP
Zoff418867	C	518	0	1	5	0	0	0	0	0	0	0	0	2	0	0.06	0.25	0	0	0	0	0	0	0	0	0.1	0.103333	0	0	0.0333333	gi|671173212|ref|XP_008727072.1|	hypothetical protein G647_04508 [Cladophialophora carrionii CBS 160.54]	ani:AN8283.2	hypothetical protein; K05917 cytochrome P450, family 51 (sterol 14-demethylase) [EC:1.14.13.70]	YHR007c	[Q] KOG0684 Cytochrome P450	sp|Q759W0|CP51_ASHGO	Lanosterol 14-alpha demethylase OS=Ashbya gossypii (strain ATCC 10895 / CBS 109.51 / FGSC 9923 / NRRL Y-1056) GN=ERG11 PE=3 SV=1	GO:0008398 ;GO:0070988 ;GO:0005506 ;GO:0020037 ;GO:0016125 ;GO:0032259 ;GO:0008168 ;GO:0055114	CYP51A	CYP51
Zoff420343	B	471	1	0	1	0	0	0	1	0	0	0	0	3	0.05	0	0.05	0	0	0	0.05	0	0	0	0	0.15	0.0333333	0	0.0166667	0.05	gi|470517645|ref|XP_004353227.1|	sterol C22 desaturase -like, putative [Acanthamoeba castellanii str. Neff]	cre:CHLREDRAFT_196874	CYP710B1; cytochrome P450, C-22 desaturase	At2g28860	[QI] KOG0157 Cytochrome P450 CYP4/CYP19/CYP26 subfamilies	sp|Q9ZV28|C7104_ARATH	Cytochrome P450 710A1 OS=Arabidopsis thaliana GN=CYP710A4 PE=2 SV=1	GO:0016491 ;GO:0005488	CYP710A	CYP710
Zoff420728	A	843	0	0	9	0	0	0	0	0	0	0	0	1	0	0	0.45	0	0	0	0	0	0	0	0	0.05	0.15	0	0	0.0166667	gi|628355726|ref|XP_007752174.1|	cytochrome P450 oxidoreductase [Cladophialophora psammophila CBS 110553]	pan:PODANSg09289	hypothetical protein	At5g25130	[Q] KOG0156 Cytochrome P450 CYP2 subfamily	sp|Q4WAW8|FTME_ASPFU	Fumitremorgin C synthase OS=Neosartorya fumigata (strain ATCC MYA-4609 / Af293 / CBS 101355 / FGSC A1100) GN=ftmP450-2 PE=3 SV=1	GO:0020037 ;GO:0016705 ;GO:0004497 ;GO:0005506 ;GO:0055114	CYP2	CYP2
Zoff421597	A	1845	0	0	0	0	0	1	0	0	0	57	0	0	0	0	0	0	0	0.05	0	0	0	2.88	0	0	0	0.0166667	0	0.96	gi|302889245|ref|XP_003043508.1|	hypothetical protein NECHADRAFT_88223 [Nectria haematococca mpVI 77-13-4]	pno:SNOG_04157	hypothetical protein	CE13541	[Q] KOG0158 Cytochrome P450 CYP3/CYP5/CYP6/CYP9 subfamilies	sp|Q00714|STCS_EMENI	Probable sterigmatocystin biosynthesis P450 monooxygenase stcS OS=Emericella nidulans (strain FGSC A4 / ATCC 38163 / CBS 112.46 / NRRL 194 / M139) GN=stcS PE=1 SV=2	GO:0046872 ;GO:0016491	CYP2	CYP2
Zoff422495	B	511	0	0	1	0	2	0	0	0	0	0	0	0	0	0	0.05	0	0.1	0	0	0	0	0	0	0	0.0166667	0.0333333	0	0	gi|598009281|ref|XP_007336579.1|	cytochrome P450 [Auricularia delicata TFB-10046 SS5]	lbc:LACBIDRAFT_300904	hypothetical protein	7290281	[QI] KOG0157 Cytochrome P450 CYP4/CYP19/CYP26 subfamilies	sp|O46054|C4AE1_DROME	Cytochrome P450 4ae1 OS=Drosophila melanogaster GN=Cyp4ae1 PE=2 SV=1	--	CYP3A	CYP3
Zoff422942	A	347	0	0	0	0	0	0	3	0	0	0	0	0	0	0	0	0	0	0	0.15	0	0	0	0	0	0	0	0.05	0	gi|576986725|gb|EUC59461.1|	cytochrome P450 family protein [Rhizoctonia solani AG-3 Rhs1AP]	--	--	--	--	--	--	GO:0046872 ;GO:0016491	CYP86A	CYP86
Zoff423314	A	467	0	0	0	0	0	0	0	0	0	0	0	3	0	0	0	0	0	0	0	0	0	0	0	0.15	0	0	0	0.05	gi|223993199|ref|XP_002286283.1|	fatty acid hydroxylase, cytochrome P450 [Thalassiosira pseudonana CCMP1335]	tps:THAPSDRAFT_1549	FAH1; fatty acid hydroxylase, cytochrome P450 (EC:1.14.14.1)	At2g46960	[QI] KOG0157 Cytochrome P450 CYP4/CYP19/CYP26 subfamilies	sp|H1A988|C7254_GLYUR	11-oxo-beta-amyrin 30-oxidase OS=Glycyrrhiza uralensis GN=CYP72A154 PE=1 SV=1	--	CYP72A	CYP72
Zoff424608	A	470	1	0	1	0	0	0	0	0	0	0	0	0	0.05	0	0.05	0	0	0	0	0	0	0	0	0	0.0333333	0	0	0	gi|576990055|gb|EUC62769.1|	O-methylsterigmatocystin oxidoreductase [Rhizoctonia solani AG-3 Rhs1AP]	lbc:LACBIDRAFT_291413	hypothetical protein	Hs10834998	[Q] KOG0156 Cytochrome P450 CYP2 subfamily	sp|O18809|CP2F3_CAPHI	Cytochrome P450 2F3 OS=Capra hircus GN=CYP2F3 PE=2 SV=1	GO:0046872 ;GO:0016491	CYP2F	CYP2
Zoff424854	D	654	9	0	0	0	0	1	0	0	0	0	0	0	0.44	0	0	0	0	0.05	0	0	0	0	0	0	0.146667	0.0166667	0	0	gi|241842382|ref|XP_002415400.1|	cytochrome P450, putative [Ixodes scapularis]	isc:IscW_ISCW022947	cytochrome P450, putative (EC:1.14.14.1)	Hs4507383	[Q] KOG0158 Cytochrome P450 CYP3/CYP5/CYP6/CYP9 subfamilies	sp|Q964T2|CP9E2_BLAGE	Cytochrome P450 9e2 OS=Blattella germanica GN=CYP9E2 PE=2 SV=1	GO:0016491 ;GO:0005488	CYP3A	CYP3
Zoff426395	D	578	3	0	0	1	0	0	0	0	0	0	0	0	0.15	0	0	0.05	0	0	0	0	0	0	0	0	0.05	0.0166667	0	0	gi|660964256|gb|KEP49368.1|	cytochrome P450 family monooxygenase [Rhizoctonia solani 123E]	pno:SNOG_04264	hypothetical protein; K07824 benzoate 4-monooxygenase [EC:1.14.13.12]	CE01655	[Q] KOG0158 Cytochrome P450 CYP3/CYP5/CYP6/CYP9 subfamilies	sp|P17549|CP53_ASPNG	Benzoate 4-monooxygenase OS=Aspergillus niger GN=bphA PE=1 SV=1	GO:0046872 ;GO:0016491	CYP86A	CYP86
Zoff430018	A	434	8	0	0	0	0	0	0	0	0	0	0	0	0.39	0	0	0	0	0	0	0	0	0	0	0	0.13	0	0	0	gi|675388676|gb|KFM81573.1|	Cytochrome P450 3A29, partial [Stegodyphus mimosarum]	tad:TRIADDRAFT_54379	hypothetical protein	CE13541	[Q] KOG0158 Cytochrome P450 CYP3/CYP5/CYP6/CYP9 subfamilies	sp|Q27516|C13A8_CAEEL	Putative cytochrome P450 CYP13A8 OS=Caenorhabditis elegans GN=cyp-13A8 PE=3 SV=2	--	CYP3A	CYP3
Zoff430281	C	525	0	0	0	0	0	0	0	0	0	5	0	0	0	0	0	0	0	0	0	0	0	0.25	0	0	0	0	0	0.0833333	gi|396487983|ref|XP_003842768.1|	similar to cytochrome P450 sterol C-22 desaturase [Leptosphaeria maculans JN3]	pno:SNOG_06055	hypothetical protein; K09831 C-22 sterol desaturase [EC:1.14.14.-]	SPAC19A8.04	[QI] KOG0157 Cytochrome P450 CYP4/CYP19/CYP26 subfamilies	sp|O13820|ERG5_SCHPO	Cytochrome P450 61 OS=Schizosaccharomyces pombe (strain 972 / ATCC 24843) GN=erg5 PE=1 SV=3	GO:0000249 ;GO:0005506 ;GO:0020037 ;GO:0006696 ;GO:0016712 ;GO:0005783 ;GO:0055114	CYP61	CYP61
Zoff430479	A	404	0	0	0	0	0	0	0	0	0	3	0	0	0	0	0	0	0	0	0	0	0	0.15	0	0	0	0	0	0.05	gi|578485655|gb|EUN23147.1|	hypothetical protein COCVIDRAFT_109554 [Bipolaris victoriae FI3]	pno:SNOG_15063	hypothetical protein; K14338 cytochrome P450 / NADPH-cytochrome P450 reductase [EC:1.14.14.1 1.6.2.4]	YHR042w	[C] KOG1158 NADP/FAD dependent oxidoreductase	sp|Q9Y8G7|C505_FUSOX	Bifunctional P-450:NADPH-P450 reductase OS=Fusarium oxysporum GN=CYP505 PE=1 SV=1	GO:0020037 ;GO:0005506 ;GO:0003958 ;GO:0070330 ;GO:0055114 ;GO:0010181	CYP505	CYP505
Zoff432262	D	402	0	0	0	0	0	1	0	0	0	0	0	0	0	0	0	0	0	0.05	0	0	0	0	0	0	0	0.0166667	0	0	gi|528240227|gb|EPY30216.1|	cytochrome p450-like protein [Angomonas deanei]	lbz:LbrM27_V2.0100	cytochrome p450-like protein (EC:1.14.-.-)	7304051	[QI] KOG0157 Cytochrome P450 CYP4/CYP19/CYP26 subfamilies	sp|Q9V4T5|CP4E1_DROME	Probable cytochrome P450 4e1 OS=Drosophila melanogaster GN=Cyp4e1 PE=2 SV=1	GO:0016491 ;GO:0005488	CYP4E	CYP4
Zoff435233	C	585	0	0	0	6	0	0	0	0	0	0	0	0	0	0	0	0.3	0	0	0	0	0	0	0	0	0	0.1	0	0	gi|471897284|emb|CCO30932.1|	Cytochrome P450 4V2 [Rhizoctonia solani AG-1 IB]	nfi:NFIA_045720	hypothetical protein	7293040	[QI] KOG0157 Cytochrome P450 CYP4/CYP19/CYP26 subfamilies	sp|Q9VXY0|CP4S3_DROME	Probable cytochrome P450 4s3 OS=Drosophila melanogaster GN=Cyp4s3 PE=3 SV=1	GO:0016491 ;GO:0005488	CYP4V	CYP4
Zoff435399	A	385	0	0	0	0	0	0	0	0	0	4	0	0	0	0	0	0	0	0	0	0	0	0.2	0	0	0	0	0	0.0666667	gi|342876412|gb|EGU78031.1|	hypothetical protein FOXB_11459 [Fusarium oxysporum Fo5176]	tad:TRIADDRAFT_55167	hypothetical protein	7304034	[Q] KOG0158 Cytochrome P450 CYP3/CYP5/CYP6/CYP9 subfamilies	sp|Q9DBW0|CP4V2_MOUSE	Cytochrome P450 4V2 OS=Mus musculus GN=Cyp4v2 PE=1 SV=1	GO:0020037 ;GO:0016705 ;GO:0004497 ;GO:0005506 ;GO:0055114	CYP4V	CYP4
Zoff439514	A	556	0	0	0	0	0	0	0	0	0	5	0	0	0	0	0	0	0	0	0	0	0	0.25	0	0	0	0	0	0.0833333	gi|587678598|gb|EWZ00916.1|	C-22 sterol desaturase [Fusarium oxysporum FOSC 3-a]	fgr:FG01959.1	hypothetical protein; K09831 C-22 sterol desaturase [EC:1.14.14.-]	YMR015c	[QI] KOG0157 Cytochrome P450 CYP4/CYP19/CYP26 subfamilies	sp|P54781|ERG5_YEAST	Cytochrome P450 61 OS=Saccharomyces cerevisiae (strain ATCC 204508 / S288c) GN=ERG5 PE=1 SV=1	GO:0000249 ;GO:0004497 ;GO:0005506 ;GO:0020037 ;GO:0006696 ;GO:0005783 ;GO:0055114	CYP61	CYP61
Zoff446245	C	330	1	0	0	0	0	0	0	0	0	0	0	0	0.05	0	0	0	0	0	0	0	0	0	0	0	0.0166667	0	0	0	gi|530278095|gb|AGT16132.1|	cytochrome P450 [Saccharum hybrid cultivar R570]	zma:100126887	cyp8, cyp78; cytochrome P-450 8	At5g09970	[Q] KOG0156 Cytochrome P450 CYP2 subfamily	sp|P48420|C78A1_MAIZE	Cytochrome P450 78A1 OS=Zea mays GN=CYP78A1 PE=2 SV=1	GO:0010075 ;GO:0009055 ;GO:0004497 ;GO:0005506 ;GO:0020037 ;GO:0016705 ;GO:0016021 ;GO:0048445 ;GO:0055114	CYP78A	CYP78
Zoff447607	C	389	0	0	0	1	0	0	0	0	0	0	0	0	0	0	0	0.05	0	0	0	0	0	0	0	0	0	0.0166667	0	0	gi|598016626|ref|XP_007338956.1|	cytochrome P450 [Auricularia delicata TFB-10046 SS5]	scm:SCHCODRAFT_63017	hypothetical protein	7297268	[QI] KOG0157 Cytochrome P450 CYP4/CYP19/CYP26 subfamilies	sp|O00061|CP67_UROFA	Cytochrome P450 67 (Fragment) OS=Uromyces fabae GN=CYP67 PE=2 SV=1	GO:0016491	CYP67	CYP67
Zoff449917	B	2552	1380	1332	927	141	778	275	2700	3802	1855	877	1524	1309	67.92	76.51	46	7.15	40.23	13.6	132.87	190.5	91.57	44.35	75.48	65.92	63.4767	20.3267	138.313	61.9167	gi|695014951|ref|XP_009394321.1|	PREDICTED: flavonoid 3'-monooxygenase [Musa acuminata subsp. malaccensis]	osa:4348304	Os10g0320100; K05280 flavonoid 3'-monooxygenase [EC:1.14.13.21]	At5g07990	[Q] KOG0156 Cytochrome P450 CYP2 subfamily	sp|Q9SD85|F3PH_ARATH	Flavonoid 3'-monooxygenase OS=Arabidopsis thaliana GN=CYP75B1 PE=1 SV=1	GO:0020037 ;GO:0005506 ;GO:0016711 ;GO:0055114	CYP75B	CYP75
Zoff450171	C	1695	1	0	0	0	0	0	0	1	0	39	0	0	0.05	0	0	0	0	0	0	0.05	0	1.97	0	0	0.0166667	0	0.0166667	0.656667	gi|302925454|ref|XP_003054099.1|	hypothetical protein NECHADRAFT_31103 [Nectria haematococca mpVI 77-13-4]	fgr:FG01284.1	hypothetical protein	At2g45510	[QI] KOG0157 Cytochrome P450 CYP4/CYP19/CYP26 subfamilies	sp|P30608|CP52F_CANTR	Cytochrome P450 52A6 OS=Candida tropicalis GN=CYP52A6 PE=2 SV=1	GO:0020037 ;GO:0016705 ;GO:0004497 ;GO:0005506 ;GO:0055114	CYP52A	CYP52
Zoff450404	A	515	1	0	0	2	0	0	0	0	0	0	0	0	0.05	0	0	0.1	0	0	0	0	0	0	0	0	0.0166667	0.0333333	0	0	gi|660959468|gb|KEP46637.1|	cytochrome P450 family protein [Rhizoctonia solani 123E]	lbc:LACBIDRAFT_311267	potential P450 cytochrome	At4g13770	[Q] KOG0156 Cytochrome P450 CYP2 subfamily	sp|O13345|ORDA_ASPPA	O-methylsterigmatocystin oxidoreductase OS=Aspergillus parasiticus GN=ordA PE=1 SV=1	GO:0020037 ;GO:0016705 ;GO:0004497 ;GO:0005506 ;GO:0055114	CYP	CYP
Zoff451469	A	467	0	0	0	0	0	0	0	0	0	4	0	0	0	0	0	0	0	0	0	0	0	0.2	0	0	0	0	0	0.0666667	gi|517324691|emb|CCT74836.1|	related to pisatin demethylase cytochrome P450 [Fusarium fujikuroi IMI 58289]	fgr:FG03260.1	hypothetical protein	CE01655	[Q] KOG0158 Cytochrome P450 CYP3/CYP5/CYP6/CYP9 subfamilies	sp|Q12645|PID9_FUSSO	Pisatin demethylase OS=Fusarium solani subsp. pisi GN=PDAT9 PE=3 SV=1	GO:0020037 ;GO:0016705 ;GO:0004497 ;GO:0005506 ;GO:0032259 ;GO:0055114 ;GO:0008168	CYP	CYP
Zoff451480	A	615	0	0	0	0	0	0	0	0	0	5	0	0	0	0	0	0	0	0	0	0	0	0.25	0	0	0	0	0	0.0833333	gi|627821103|ref|XP_007683391.1|	hypothetical protein COCMIDRAFT_22399 [Bipolaris oryzae ATCC 44560]	pno:SNOG_07696	hypothetical protein	Hs16933533	[Q] KOG0158 Cytochrome P450 CYP3/CYP5/CYP6/CYP9 subfamilies	sp|O94142|KO1_GIBFU	Ent-kaurene oxidase OS=Gibberella fujikuroi GN=CYP503A1 PE=1 SV=1	GO:0046872 ;GO:0016491	CYP503A	CYP503
Zoff452665	A	488	1	0	0	0	0	0	0	0	0	5	0	0	0.05	0	0	0	0	0	0	0	0	0.25	0	0	0.0166667	0	0	0.0833333	gi|302890401|ref|XP_003044085.1|	hypothetical protein NECHADRAFT_91479 [Nectria haematococca mpVI 77-13-4]	fgr:FG09351.1	hypothetical protein	At4g13290	[Q] KOG0156 Cytochrome P450 CYP2 subfamily	sp|P38364|PID6_FUSSO	Pisatin demethylase OS=Fusarium solani subsp. pisi GN=PDA6-1 PE=3 SV=1	GO:0020037 ;GO:0016705 ;GO:0004497 ;GO:0005506 ;GO:0032259 ;GO:0055114 ;GO:0008168	CYP	CYP
Zoff453593	C	1515	0	0	1.21	2.31	0	2	3.59	4	2	836.19	1	2	0	0	0.06	0.12	0	0.1	0.18	0.2	0.1	42.29	0.05	0.1	0.02	0.0733333	0.16	14.1467	gi|3914161|sp|Q00616.1|NOR1_CYLTO	RecName: Full=Cytochrome P450 55A2; AltName: Full=Cytochrome P450NOR1 [Fusarium lichenicola]	pan:PODANSg1411	hypothetical protein	At1g05160	[QI] KOG0157 Cytochrome P450 CYP4/CYP19/CYP26 subfamilies	sp|Q00616|NOR1_CYLTO	Cytochrome P450 55A2 OS=Cylindrocarpon tonkinense GN=CYP55A2 PE=3 SV=1	GO:0020037 ;GO:0016705 ;GO:0004497 ;GO:0005506 ;GO:0055114	CYP55A	CYP55
Zoff453788	C	1668	0	0	0	0	0	0	0	0	0	35	0	0	0	0	0	0	0	0	0	0	0	1.77	0	0	0	0	0	0.59	gi|302918548|ref|XP_003052680.1|	hypothetical protein NECHADRAFT_36280 [Nectria haematococca mpVI 77-13-4]	ncr:NCU02031	hypothetical protein	At3g01900	[QI] KOG0157 Cytochrome P450 CYP4/CYP19/CYP26 subfamilies	sp|Q9Y758|CP52M_DEBHN	Cytochrome P450 52A13 OS=Debaryomyces hansenii GN=CYP52A13 PE=2 SV=1	GO:0046872 ;GO:0016705 ;GO:0004497	CYP52A	CYP52
Zoff454467	A	827	1	0	0	1	1	1	1	2	1	2	0	0	0.05	0	0	0.05	0.05	0.05	0.05	0.1	0.05	0.1	0	0	0.0166667	0.05	0.0666667	0.0333333	gi|628347540|ref|XP_007749576.1|	hypothetical protein A1O5_10812 [Cladophialophora psammophila CBS 110553]	nfi:NFIA_094190	Cytochrome P450 oxidoreductase, putative	Hs4503203	[Q] KOG0156 Cytochrome P450 CYP2 subfamily	sp|Q4WAW8|FTME_ASPFU	Fumitremorgin C synthase OS=Neosartorya fumigata (strain ATCC MYA-4609 / Af293 / CBS 101355 / FGSC A1100) GN=ftmP450-2 PE=3 SV=1	GO:0020037 ;GO:0016705 ;GO:0004497 ;GO:0005506 ;GO:0055114	CYP2	CYP2
Zoff454699	C	465	1	0	0	2	1	0	0	0	0	0	0	0	0.05	0	0	0.1	0.05	0	0	0	0	0	0	0	0.0166667	0.05	0	0	gi|576983791|gb|EUC56534.1|	cytochrome P450 family monooxygenase pc-3 [Rhizoctonia solani AG-3 Rhs1AP]	cci:CC1G_02244	cytochrome P450 monooxygenase pc-1	Hs4503211	[Q] KOG0159 Cytochrome P450 CYP11/CYP12/CYP24/CYP27 subfamilies	sp|Q12588|CP52J_CANMA	Cytochrome P450 52A10 OS=Candida maltosa GN=CYP52A10 PE=2 SV=1	GO:0020037 ;GO:0016705 ;GO:0004497 ;GO:0005506 ;GO:0055114	CYP52A	CYP52
Zoff455257	A	871	3	1	0	2	0	1	1	2	1	0	0	0	0.15	0.06	0	0.1	0	0.05	0.05	0.1	0.05	0	0	0	0.07	0.05	0.0666667	0	gi|628306670|ref|XP_007740501.1|	hypothetical protein A1O5_01695 [Cladophialophora psammophila CBS 110553]	pan:PODANSg09289	hypothetical protein	At4g12320	[Q] KOG0156 Cytochrome P450 CYP2 subfamily	sp|A1DA63|FTME_NEOFI	Fumitremorgin C synthase OS=Neosartorya fischeri (strain ATCC 1020 / DSM 3700 / FGSC A1164 / NRRL 181) GN=ftmP450-2 PE=3 SV=1	GO:0020037 ;GO:0016705 ;GO:0004497 ;GO:0005506 ;GO:0055114	CYP2	CYP2
Zoff455907	A	2235	9.08	8	3	3	3.64	1	0	1.9	4	1.78	1	0	0.45	0.46	0.15	0.15	0.19	0.05	0	0.1	0.2	0.09	0.05	0	0.353333	0.13	0.1	0.0466667	gi|628324467|ref|XP_007743110.1|	hypothetical protein A1O5_04313 [Cladophialophora psammophila CBS 110553]	pan:PODANSg8505	hypothetical protein	At2g27690	[QI] KOG0157 Cytochrome P450 CYP4/CYP19/CYP26 subfamilies	sp|Q12645|PID9_FUSSO	Pisatin demethylase OS=Fusarium solani subsp. pisi GN=PDAT9 PE=3 SV=1	GO:0046872 ;GO:0008152 ;GO:0016491	CYP	CYP
Zoff455908	A	1183	0.92	0	0	0	0.36	0	0	1.1	0	0.22	0	1	0.05	0	0	0	0.02	0	0	0.06	0	0.01	0	0.05	0.0166667	0.00666667	0.02	0.02	gi|628324467|ref|XP_007743110.1|	hypothetical protein A1O5_04313 [Cladophialophora psammophila CBS 110553]	pan:PODANSg8505	hypothetical protein	Hs4503211	[Q] KOG0159 Cytochrome P450 CYP11/CYP12/CYP24/CYP27 subfamilies	sp|Q12645|PID9_FUSSO	Pisatin demethylase OS=Fusarium solani subsp. pisi GN=PDAT9 PE=3 SV=1	GO:0046872 ;GO:0008152 ;GO:0016491	CYP	CYP
Zoff456763	C	492	0	0	0	0	0	0	0	0	0	0	0	2	0	0	0	0	0	0	0	0	0	0	0	0.1	0	0	0	0.0333333	gi|697455173|gb|KGL92376.1|	Cytochrome P450 4V2, partial [Charadrius vociferus]	xla:100036997	hypothetical protein LOC100036997	CE15919	[QI] KOG0157 Cytochrome P450 CYP4/CYP19/CYP26 subfamilies	sp|Q9DBW0|CP4V2_MOUSE	Cytochrome P450 4V2 OS=Mus musculus GN=Cyp4v2 PE=1 SV=1	--	CYP4V	CYP4
Zoff457438	A	563	0	0	0	0	0	0	0	0	0	0	0	7	0	0	0	0	0	0	0	0	0	0	0	0.35	0	0	0	0.116667	gi|628350677|ref|XP_007750574.1|	hypothetical protein A1O5_11814 [Cladophialophora psammophila CBS 110553]	pcs:Pc20g05940	Pc20g05940	At4g13770	[Q] KOG0156 Cytochrome P450 CYP2 subfamily	sp|Q4WAW8|FTME_ASPFU	Fumitremorgin C synthase OS=Neosartorya fumigata (strain ATCC MYA-4609 / Af293 / CBS 101355 / FGSC A1100) GN=ftmP450-2 PE=3 SV=1	GO:0046872 ;GO:0016491	CYP2	CYP2
Zoff457772	A	749	0	0	0	0	0	0	0	0	0	3	0	5	0	0	0	0	0	0	0	0	0	0.15	0	0.25	0	0	0	0.133333	gi|598019193|ref|XP_007339848.1|	cytochrome P450 [Auricularia delicata TFB-10046 SS5]	lbc:LACBIDRAFT_315756	cytochrome P450	CE01702	[Q] KOG0158 Cytochrome P450 CYP3/CYP5/CYP6/CYP9 subfamilies	sp|Q09653|C13AA_CAEEL	Putative cytochrome P450 CYP13A10 OS=Caenorhabditis elegans GN=cyp-13A10 PE=3 SV=3	GO:0046872 ;GO:0016491	CYP13A	CYP13
Zoff458439	A	597	0	0	0	8	0	0	0	0	0	0	0	0	0	0	0	0.41	0	0	0	0	0	0	0	0	0	0.136667	0	0	gi|471901065|emb|CCO30019.1|	Cytochrome P450 3A6 [Rhizoctonia solani AG-1 IB]	lbc:LACBIDRAFT_304063	hypothetical protein	At3g14660	[QI] KOG0157 Cytochrome P450 CYP4/CYP19/CYP26 subfamilies	sp|P11707|CP3A6_RABIT	Cytochrome P450 3A6 OS=Oryctolagus cuniculus GN=CYP3A6 PE=2 SV=2	GO:0046872 ;GO:0016491	CYP3A	CYP3
Zoff458610	A	346	0	0	0	0	0	0	0	0	0	3	0	0	0	0	0	0	0	0	0	0	0	0.15	0	0	0	0	0	0.05	gi|302888625|ref|XP_003043199.1|	hypothetical protein NECHADRAFT_72652 [Nectria haematococca mpVI 77-13-4]	fgr:FG03686.1	hypothetical protein	YMR015c	[QI] KOG0157 Cytochrome P450 CYP4/CYP19/CYP26 subfamilies	sp|P54781|ERG5_YEAST	Cytochrome P450 61 OS=Saccharomyces cerevisiae (strain ATCC 204508 / S288c) GN=ERG5 PE=1 SV=1	GO:0005488 ;GO:0016705 ;GO:0044710	CYP61	CYP61
Zoff459327	A	668	0	0	8	0	0	0	0	0	0	1	0	1	0	0	0.4	0	0	0	0	0	0	0.05	0	0.05	0.133333	0	0	0.0333333	gi|628254741|ref|XP_007729327.1|	hypothetical protein A1O3_00988 [Capronia epimyces CBS 606.96]	aor:AOR_1_808194	AO090012000465; O-methylsterigmatocystin oxidoreductase	At3g53280	[Q] KOG0156 Cytochrome P450 CYP2 subfamily	sp|O13345|ORDA_ASPPA	O-methylsterigmatocystin oxidoreductase OS=Aspergillus parasiticus GN=ordA PE=1 SV=1	GO:0016491 ;GO:0005488	CYP	CYP
Zoff459888	B	1148	39	35	39	35	47	5	18	19	7	34	84	44	1.92	2.01	1.94	1.78	2.43	0.25	0.89	0.95	0.35	1.72	4.16	2.22	1.95667	1.48667	0.73	2.7	gi|695054613|ref|XP_009415441.1|	PREDICTED: cytochrome P450 93A3-like [Musa acuminata subsp. malaccensis]	pop:POPTR_89386	CYP93A4; cytochrome P450	At5g06900	[Q] KOG0156 Cytochrome P450 CYP2 subfamily	sp|O81973|C93A3_SOYBN	Cytochrome P450 93A3 OS=Glycine max GN=CYP93A3 PE=2 SV=1	GO:0046872 ;GO:0016491	CYP93A	CYP93
Zoff460379	A	412	0	0	0	0	0	0	0	3	0	0	0	0	0	0	0	0	0	0	0	0.15	0	0	0	0	0	0	0.05	0	gi|471870720|emb|CCO36833.1|	NADPH-ferrihemoprotein reductase [Rhizoctonia solani AG-1 IB]	ang:ANI_1_396144	An16g02820; NADPH--cytochrome P450 reductase; K14338 cytochrome P450 / NADPH-cytochrome P450 reductase [EC:1.14.14.1 1.6.2.4]	--	--	sp|Q9Y8G7|C505_FUSOX	Bifunctional P-450:NADPH-P450 reductase OS=Fusarium oxysporum GN=CYP505 PE=1 SV=1	GO:0020037 ;GO:0005506 ;GO:0003958 ;GO:0070330 ;GO:0055114 ;GO:0010181	CYP505	CYP505
Zoff461645	A	384	5	2	0	0	5	2	1	9	1	0	0	2	0.25	0.11	0	0	0.26	0.1	0.05	0.45	0.05	0	0	0.1	0.12	0.12	0.183333	0.0333333	gi|403399730|sp|E3W9C4.1|C71A1_ZINZE	RecName: Full=Alpha-humulene 10-hydroxylase [Zingiber zerumbet]	osa:4335096	Os04g0180400	At5g06900	[Q] KOG0156 Cytochrome P450 CYP2 subfamily	sp|E3W9C4|C71A1_ZINZE	Alpha-humulene 10-hydroxylase OS=Zingiber zerumbet GN=CYP71BA1 PE=1 SV=1	GO:0046872 ;GO:0051502 ;GO:0004497	CYP71B	CYP71
Zoff463656	C	554	1	0	0	0	0	0	0	0	1	0	0	10	0.05	0	0	0	0	0	0	0	0.05	0	0	0.5	0.0166667	0	0.0166667	0.166667	gi|524994805|ref|XP_005045213.1|	PREDICTED: cytochrome P450 4V2-like [Ficedula albicollis]	mgp:100549160	cytochrome P450 4V3-like	CE15919	[QI] KOG0157 Cytochrome P450 CYP4/CYP19/CYP26 subfamilies	sp|Q9DBW0|CP4V2_MOUSE	Cytochrome P450 4V2 OS=Mus musculus GN=Cyp4v2 PE=1 SV=1	--	CYP4V	CYP4
Zoff464707	A	507	2	1	0	0	0	0	0	0	0	0	0	0	0.1	0.06	0	0	0	0	0	0	0	0	0	0	0.0533333	0	0	0	gi|443917663|gb|ELU38329.1|	cytochrome P450 [Rhizoctonia solani AG-1 IA]	cci:CC1G_09782	cytochrome P450	At1g74550	[Q] KOG0156 Cytochrome P450 CYP2 subfamily	sp|O13345|ORDA_ASPPA	O-methylsterigmatocystin oxidoreductase OS=Aspergillus parasiticus GN=ordA PE=1 SV=1	GO:0019211 ;GO:0020037 ;GO:0043085 ;GO:0016705 ;GO:0004497 ;GO:0005506 ;GO:0055114	CYP	CYP
Zoff465097	C	457	0	1	1	2	0	2	0	0	0	0	1	0	0	0.06	0.05	0.1	0	0.1	0	0	0	0	0.05	0	0.0366667	0.0666667	0	0.0166667	gi|414873817|tpg|DAA52374.1|	TPA: putative cytochrome P450 superfamily protein [Zea mays]	sbi:SORBI_01g002160	hypothetical protein	At1g19630	[QI] KOG0157 Cytochrome P450 CYP4/CYP19/CYP26 subfamilies	sp|Q0J185|ABAH3_ORYSJ	Abscisic acid 8'-hydroxylase 3 OS=Oryza sativa subsp. japonica GN=CYP707A7 PE=2 SV=1	GO:0020037 ;GO:0016705 ;GO:0004497 ;GO:0005506 ;GO:0055114	CYP707A	CYP707
Zoff465477	A	669	1	0	1	0	2	0	0	0	0	0	0	0	0.05	0	0.05	0	0.1	0	0	0	0	0	0	0	0.0333333	0.0333333	0	0	gi|576994399|gb|EUC67016.1|	cytochrome P450 family oxidoreductase, partial [Rhizoctonia solani AG-3 Rhs1AP]	lbc:LACBIDRAFT_311267	potential P450 cytochrome	At5g07990	[Q] KOG0156 Cytochrome P450 CYP2 subfamily	sp|B8NHY4|ORDA_ASPFN	O-methylsterigmatocystin oxidoreductase OS=Aspergillus flavus (strain ATCC 200026 / FGSC A1120 / NRRL 3357 / JCM 12722 / SRRC 167) GN=ordA PE=2 SV=1	GO:0046872 ;GO:0016491	CYP	CYP
Zoff465823	A	641	0	0	7	1	0	0	0	0	1	2	0	0	0	0	0.35	0.05	0	0	0	0	0.05	0.1	0	0	0.116667	0.0166667	0.0166667	0.0333333	gi|695058613|ref|XP_009417625.1|	PREDICTED: abscisic acid 8'-hydroxylase 3-like [Musa acuminata subsp. malaccensis]	osa:4347261	Os09g0457100; K09843 (+)-abscisic acid 8'-hydroxylase [EC:1.14.13.93]	At4g19230	[QI] KOG0157 Cytochrome P450 CYP4/CYP19/CYP26 subfamilies	sp|Q0J185|ABAH3_ORYSJ	Abscisic acid 8'-hydroxylase 3 OS=Oryza sativa subsp. japonica GN=CYP707A7 PE=2 SV=1	GO:0016021 ;GO:0055114 ;GO:0010295 ;GO:0046345 ;GO:0016023 ;GO:0020037 ;GO:0005506	CYP707A	CYP707
Zoff466019	B	338	1	0	0	0	0	0	0	0	0	0	0	0	0.05	0	0	0	0	0	0	0	0	0	0	0	0.0166667	0	0	0	gi|565302314|gb|ETE58943.1|	Steroid 17-alpha-hydroxylase/17,20 lyase, partial [Ophiophagus hannah]	nve:NEMVE_v1g230060	hypothetical protein	Hs22064517	[Q] KOG0156 Cytochrome P450 CYP2 subfamily	sp|Q92113|CP17A_SQUAC	Steroid 17-alpha-hydroxylase/17,20 lyase OS=Squalus acanthias GN=CYP17A1 PE=2 SV=1	GO:0016491 ;GO:0005488	CYP2D	CYP2
Zoff466157	A	651	0	0	0	0	0	0	0	0	0	0	0	5	0	0	0	0	0	0	0	0	0	0	0	0.25	0	0	0	0.0833333	gi|397615700|gb|EJK63588.1|	hypothetical protein THAOC_15743 [Thalassiosira oceanica]	mgp:100541378	1,25-dihydroxyvitamin D(3) 24-hydroxylase, mitochondrial-like	CE06455	[QI] KOG0157 Cytochrome P450 CYP4/CYP19/CYP26 subfamilies	sp|Q64441|CP24A_MOUSE	1,25-dihydroxyvitamin D(3) 24-hydroxylase, mitochondrial OS=Mus musculus GN=Cyp24a1 PE=2 SV=1	--	CYP12A	CYP12
Zoff466501	B	456	0	0	0	0	2	0	0	2	1	0	0	0	0	0	0	0	0.1	0	0	0.1	0.05	0	0	0	0	0.0333333	0.05	0	gi|557726332|dbj|GAD95018.1|	hypothetical protein PTT_08923 [Byssochlamys spectabilis No. 5]	pno:SNOG_16391	hypothetical protein	--	--	sp|Q4WAW5|FTMC_ASPFU	Tryprostatin B 6-hydroxylase OS=Neosartorya fumigata (strain ATCC MYA-4609 / Af293 / CBS 101355 / FGSC A1100) GN=ftmP450-1 PE=3 SV=2	GO:0046872 ;GO:0008152 ;GO:0016491	CYP	CYP
Zoff466846	A	392	0	0	0	0	1	0	0	0	0	2	0	0	0	0	0	0	0.05	0	0	0	0	0.1	0	0	0	0.0166667	0	0.0333333	gi|628074843|ref|XP_007702075.1|	hypothetical protein COCSADRAFT_38642 [Bipolaris sorokiniana ND90Pr]	pno:SNOG_03702	hypothetical protein; K05917 cytochrome P450, family 51 (sterol 14-demethylase) [EC:1.14.13.70]	SPAC13A11.02c	[Q] KOG0684 Cytochrome P450	sp|O14442|CP51_UNCNE	Eburicol 14-alpha-demethylase OS=Uncinula necator GN=CYP51 PE=2 SV=2	GO:0006468 ;GO:0055114 ;GO:0004674 ;GO:0008398 ;GO:0006696 ;GO:0032259 ;GO:0005524 ;GO:0020037 ;GO:0008168 ;GO:0005506 ;GO:0070988 ;GO:0005783	CYP51	CYP51
Zoff471100	D	462	0	0	0	0	0	0	0	0	0	4	0	0	0	0	0	0	0	0	0	0	0	0.2	0	0	0	0	0	0.0666667	gi|302882920|ref|XP_003040365.1|	hypothetical protein NECHADRAFT_34857 [Nectria haematococca mpVI 77-13-4]	fgr:FG11303.1	hypothetical protein	At1g67110	[QI] KOG0157 Cytochrome P450 CYP4/CYP19/CYP26 subfamilies	sp|Q9ZW95|C7352_ARATH	Cytokinin hydroxylase OS=Arabidopsis thaliana GN=CYP735A2 PE=1 SV=1	GO:0020037 ;GO:0016705 ;GO:0004497 ;GO:0005506 ;GO:0055114	CYP735A	CYP735
Zoff471795	A	720	0	0	0	0	0	0	0	0	0	0	0	4	0	0	0	0	0	0	0	0	0	0	0	0.2	0	0	0	0.0666667	gi|470450119|ref|XP_004340356.1|	cytochrome p450 superfamily protein [Acanthamoeba castellanii str. Neff]	rcu:RCOM_0837520	cytochrome P450, putative (EC:1.14.14.1)	At1g69500	[QI] KOG0157 Cytochrome P450 CYP4/CYP19/CYP26 subfamilies	sp|Q9C788|C70B1_ARATH	Cytochrome P450 704B1 OS=Arabidopsis thaliana GN=CYP704B1 PE=2 SV=1	GO:0016491	CYP704B	CYP704
Zoff474178	D	579	0	0	0	1	0	3	0	0	0	0	0	0	0	0	0	0.05	0	0.15	0	0	0	0	0	0	0	0.0666667	0	0	gi|695415529|ref|XP_009526586.1|	hypothetical protein PHYSODRAFT_314852 [Phytophthora sojae]	pif:PITG_13865	cytochrome P450, putative	At5g08250	[QI] KOG0157 Cytochrome P450 CYP4/CYP19/CYP26 subfamilies	sp|Q9FMY1|C86B1_ARATH	Cytochrome P450 86B1 OS=Arabidopsis thaliana GN=CYP86B1 PE=2 SV=1	GO:0016491 ;GO:0005488	CYP86B	CYP86
Zoff475790	A	1112	1	0	0	4	3	3	0	3	0	0	0	1	0.05	0	0	0.2	0.16	0.15	0	0.15	0	0	0	0.05	0.0166667	0.17	0.05	0.0166667	gi|656909963|gb|KEF55641.1|	hypothetical protein A1O9_08391 [Exophiala aquamarina CBS 119918]	pno:SNOG_10960	hypothetical protein	At4g13310	[Q] KOG0156 Cytochrome P450 CYP2 subfamily	sp|P38364|PID6_FUSSO	Pisatin demethylase OS=Fusarium solani subsp. pisi GN=PDA6-1 PE=3 SV=1	GO:0046872 ;GO:0008152 ;GO:0016491	CYP	CYP
Zoff485603	A	363	4	0	0	0	0	0	0	0	0	0	0	0	0.2	0	0	0	0	0	0	0	0	0	0	0	0.0666667	0	0	0	gi|501297366|dbj|BAN21142.1|	cytochromeP450 [Riptortus pedestris]	isc:IscW_ISCW019880	cytochrome P450, putative (EC:1.14.14.1)	7299618	[Q] KOG0158 Cytochrome P450 CYP3/CYP5/CYP6/CYP9 subfamilies	sp|Q964T2|CP9E2_BLAGE	Cytochrome P450 9e2 OS=Blattella germanica GN=CYP9E2 PE=2 SV=1	GO:0016491	CYP9E	CYP9
Zoff489407	A	330	0	0	0	0	0	2	0	0	0	0	0	0	0	0	0	0	0	0.1	0	0	0	0	0	0	0	0.0333333	0	0	gi|695434233|ref|XP_009531375.1|	hypothetical protein PHYSODRAFT_511510 [Phytophthora sojae]	pif:PITG_09787	cytochrome P450, putative	At1g34540	[QI] KOG0157 Cytochrome P450 CYP4/CYP19/CYP26 subfamilies	sp|P33268|CP3A8_MACFA	Cytochrome P450 3A8 OS=Macaca fascicularis GN=CYP3A8 PE=1 SV=1	GO:0046872 ;GO:0016491	CYP86A	CYP86
Zoff490337	A	391	0	1	0	0	0	0	0	2	2	0	0	0	0	0.06	0	0	0	0	0	0.1	0.1	0	0	0	0.02	0	0.0666667	0	gi|628334063|ref|XP_007745260.1|	hypothetical protein A1O5_06476 [Cladophialophora psammophila CBS 110553]	ani:AN8358.2	hypothetical protein	At1g74540	[Q] KOG0156 Cytochrome P450 CYP2 subfamily	sp|B8NHY4|ORDA_ASPFN	O-methylsterigmatocystin oxidoreductase OS=Aspergillus flavus (strain ATCC 200026 / FGSC A1120 / NRRL 3357 / JCM 12722 / SRRC 167) GN=ordA PE=2 SV=1	GO:0020037 ;GO:0016705 ;GO:0004497 ;GO:0005506 ;GO:0055114	CYP	CYP
Zoff490576	A	1048	0	0	10	0	0	0	0	0	0	0	0	0	0	0	0.5	0	0	0	0	0	0	0	0	0	0.166667	0	0	0	gi|628266718|ref|XP_007730470.1|	hypothetical protein A1O3_02137 [Capronia epimyces CBS 606.96]	aor:AOR_1_978024	AO090010000587; cytochrome P450	At5g25180	[Q] KOG0156 Cytochrome P450 CYP2 subfamily	sp|A1DA65|FTMG_NEOFI	Fumitremorgin C monooxygenase OS=Neosartorya fischeri (strain ATCC 1020 / DSM 3700 / FGSC A1164 / NRRL 181) GN=ftmP450-3 PE=3 SV=1	GO:0016491 ;GO:0005488	CYP2	CYP2
Zoff490696	C	664	0	0	0	0	2	0	0	0	0	1	0	2	0	0	0	0	0.1	0	0	0	0	0.05	0	0.1	0	0.0333333	0	0.05	gi|598027183|ref|XP_007342964.1|	lanosterol 14-alpha-demethylase [Auricularia delicata TFB-10046 SS5]	cci:CC1G_07605	lanosterol 14-alpha-demethylase; K05917 cytochrome P450, family 51 (sterol 14-demethylase) [EC:1.14.13.70]	YHR007c	[Q] KOG0684 Cytochrome P450	sp|P49602|CP51_USTMA	Lanosterol 14-alpha demethylase OS=Ustilago maydis (strain 521 / FGSC 9021) GN=ERG11 PE=3 SV=1	GO:0020037 ;GO:0008398 ;GO:0005506 ;GO:0032259 ;GO:0070988 ;GO:0055114 ;GO:0008168	CYP51A	CYP51
Zoff491169	D	983	0	0	1	0	5	2	0	2	0	0	0	0	0	0	0.05	0	0.26	0.1	0	0.1	0	0	0	0	0.0166667	0.12	0.0333333	0	gi|656912521|gb|KEF58103.1|	hypothetical protein A1O9_06026 [Exophiala aquamarina CBS 119918]	ncr:NCU06526	hypothetical protein	At2g27690	[QI] KOG0157 Cytochrome P450 CYP4/CYP19/CYP26 subfamilies	sp|Q12645|PID9_FUSSO	Pisatin demethylase OS=Fusarium solani subsp. pisi GN=PDAT9 PE=3 SV=1	GO:0020037 ;GO:0016705 ;GO:0004497 ;GO:0005506 ;GO:0055114	CYP	CYP
Zoff491274	C	1604	2	0	0	2	1	2	0	1	1	537	1	2	0.1	0	0	0.1	0.05	0.1	0	0.05	0.05	27.16	0.05	0.1	0.0333333	0.0833333	0.0333333	9.10333	gi|302887494|ref|XP_003042635.1|	predicted protein [Nectria haematococca mpVI 77-13-4]	pan:PODANSg1411	hypothetical protein	At1g05160	[QI] KOG0157 Cytochrome P450 CYP4/CYP19/CYP26 subfamilies	sp|Q12599|NOR2_CYLTO	Cytochrome P450 55A3 OS=Cylindrocarpon tonkinense GN=CYP55A3 PE=3 SV=1	GO:0020037 ;GO:0016705 ;GO:0004497 ;GO:0005506 ;GO:0055114	CYP55A	CYP55
Zoff491766	A	408	0	0	0	0	0	0	0	0	0	3	0	0	0	0	0	0	0	0	0	0	0	0.15	0	0	0	0	0	0.05	gi|587684482|gb|EWZ31087.1|	hypothetical protein FOZG_15496 [Fusarium oxysporum Fo47]	fgr:FG11465.1	hypothetical protein	At3g61040	[Q] KOG0156 Cytochrome P450 CYP2 subfamily	sp|Q12608|STCB_EMENI	Probable sterigmatocystin biosynthesis P450 monooxygenase STCB OS=Emericella nidulans (strain FGSC A4 / ATCC 38163 / CBS 112.46 / NRRL 194 / M139) GN=stcB PE=3 SV=2	GO:0020037 ;GO:0016705 ;GO:0004497 ;GO:0005506 ;GO:0055114	CYP2	CYP2
Zoff492682	C	1727	13	9	0	5	0	0	0	4	0	0	0	0	0.64	0.52	0	0.25	0	0	0	0.2	0	0	0	0	0.386667	0.0833333	0.0666667	0	gi|656907673|gb|KEF53410.1|	3-hydroxyphenylacetate 6-hydroxylase [Exophiala aquamarina CBS 119918]	cim:CIMG_07204	hypothetical protein; K10438 3-hydroxyphenylacetate 6-hydroxylase [EC:1.14.13.63]	At4g37330	[Q] KOG0156 Cytochrome P450 CYP2 subfamily	sp|Q078T0|PHACB_EMEND	3-hydroxyphenylacetate 6-hydroxylase OS=Emericella nidulans GN=phacB PE=1 SV=1	GO:0020037 ;GO:0016705 ;GO:0004497 ;GO:0005506 ;GO:0055114	CYP2	CYP2
Zoff492683	C	1648	0	0	1	0	2	2	2	0	3	0	0	0	0	0	0.05	0	0.1	0.1	0.1	0	0.15	0	0	0	0.0166667	0.0666667	0.0833333	0	gi|656907673|gb|KEF53410.1|	3-hydroxyphenylacetate 6-hydroxylase [Exophiala aquamarina CBS 119918]	cim:CIMG_07204	hypothetical protein; K10438 3-hydroxyphenylacetate 6-hydroxylase [EC:1.14.13.63]	At4g37330	[Q] KOG0156 Cytochrome P450 CYP2 subfamily	sp|Q078T0|PHACB_EMEND	3-hydroxyphenylacetate 6-hydroxylase OS=Emericella nidulans GN=phacB PE=1 SV=1	GO:0020037 ;GO:0016705 ;GO:0004497 ;GO:0005506 ;GO:0055114	CYP2	CYP2
Zoff493763	B	954	2	0	1	0	0	0	0	0	0	0	0	5	0.1	0	0.05	0	0	0	0	0	0	0	0	0.25	0.05	0	0	0.0833333	gi|460371338|ref|XP_004231497.1|	PREDICTED: cytochrome P450 86B1 [Solanum lycopersicum]	tad:TRIADDRAFT_59598	hypothetical protein	At4g13310	[Q] KOG0156 Cytochrome P450 CYP2 subfamily	sp|Q9T0K2|C71AK_ARATH	Cytochrome P450 71A20 OS=Arabidopsis thaliana GN=CYP71A20 PE=2 SV=2	--	CYP71A	CYP71
Zoff493786	A	630	2	1	1	0	1	1	1	0	0	0	0	0	0.1	0.06	0.05	0	0.05	0.05	0.05	0	0	0	0	0	0.07	0.0333333	0.0166667	0	gi|628334063|ref|XP_007745260.1|	hypothetical protein A1O5_06476 [Cladophialophora psammophila CBS 110553]	ani:AN8358.2	hypothetical protein	Hs4503203	[Q] KOG0156 Cytochrome P450 CYP2 subfamily	sp|A1DA63|FTME_NEOFI	Fumitremorgin C synthase OS=Neosartorya fischeri (strain ATCC 1020 / DSM 3700 / FGSC A1164 / NRRL 181) GN=ftmP450-2 PE=3 SV=1	GO:0020037 ;GO:0016705 ;GO:0004497 ;GO:0005506 ;GO:0055114	CYP2	CYP2
Zoff493947	D	668	0	0	0	0	0	0	0	0	0	4	0	0	0	0	0	0	0	0	0	0	0	0.2	0	0	0	0	0	0.0666667	gi|587684809|gb|EWZ31414.1|	hypothetical protein FOZG_15807 [Fusarium oxysporum Fo47]	ani:AN9296.2	hypothetical protein	Hs16933535	[Q] KOG0158 Cytochrome P450 CYP3/CYP5/CYP6/CYP9 subfamilies	sp|Q12645|PID9_FUSSO	Pisatin demethylase OS=Fusarium solani subsp. pisi GN=PDAT9 PE=3 SV=1	GO:0020037 ;GO:0016705 ;GO:0004497 ;GO:0005506 ;GO:0032259 ;GO:0055114 ;GO:0008168	CYP	CYP
Zoff494175	A	904	11	0	4	0	0	0	0	0	0	0	2	1	0.54	0	0.2	0	0	0	0	0	0	0	0.1	0.05	0.246667	0	0	0.05	gi|471885176|emb|CCO33615.1|	O-methylsterigmatocystin oxidoreductase Short=OMST oxidoreductase [Rhizoctonia solani AG-1 IB]	lbc:LACBIDRAFT_251026	hypothetical protein	At3g10560	[Q] KOG0156 Cytochrome P450 CYP2 subfamily	sp|B8NHY4|ORDA_ASPFN	O-methylsterigmatocystin oxidoreductase OS=Aspergillus flavus (strain ATCC 200026 / FGSC A1120 / NRRL 3357 / JCM 12722 / SRRC 167) GN=ordA PE=2 SV=1	GO:0020037 ;GO:0016705 ;GO:0005506 ;GO:0055114	CYP2E	CYP2
Zoff494823	B	340	0	1	0	0	0	0	0	0	0	2	0	0	0	0.06	0	0	0	0	0	0	0	0.1	0	0	0.02	0	0	0.0333333	gi|330939738|ref|XP_003305877.1|	hypothetical protein PTT_18832 [Pyrenophora teres f. teres 0-1]	pcs:Pc22g19240	Pc22g19240	At5g08250	[QI] KOG0157 Cytochrome P450 CYP4/CYP19/CYP26 subfamilies	sp|Q12589|CP52K_CANMA	Cytochrome P450 52A11 OS=Candida maltosa GN=CYP52A11 PE=2 SV=1	GO:0020037 ;GO:0016712 ;GO:0005506 ;GO:0055114	CYP52A	CYP52
Zoff494944	C	371	0	0	0	0	0	0	0	0	0	1	0	0	0	0	0	0	0	0	0	0	0	0.05	0	0	0	0	0	0.0166667	gi|302915220|ref|XP_003051421.1|	predicted protein [Nectria haematococca mpVI 77-13-4]	fgr:FG11024.1	hypothetical protein	SPAC13A11.02c	[Q] KOG0684 Cytochrome P450	sp|O14442|CP51_UNCNE	Eburicol 14-alpha-demethylase OS=Uncinula necator GN=CYP51 PE=2 SV=2	GO:0008398 ;GO:0070988 ;GO:0005506 ;GO:0020037 ;GO:0006696 ;GO:0032259 ;GO:0008168 ;GO:0005783 ;GO:0055114	CYP51	CYP51
Zoff495349	A	488	0	0	0	7	0	0	0	0	0	0	0	0	0	0	0	0.36	0	0	0	0	0	0	0	0	0	0.12	0	0	gi|443926231|gb|ELU44942.1|	cytochrome P450 [Rhizoctonia solani AG-1 IA]	lbc:LACBIDRAFT_300904	hypothetical protein	--	--	--	--	GO:0046872 ;GO:0016491	CYP3A	CYP3
Zoff495814	B	320	0	0	0	0	1	0	0	0	0	0	0	1	0	0	0	0	0.05	0	0	0	0	0	0	0.05	0	0.0166667	0	0.0166667	gi|598027313|ref|XP_007343029.1|	cytochrome P450 [Auricularia delicata TFB-10046 SS5]	aor:AOR_1_808194	AO090012000465; O-methylsterigmatocystin oxidoreductase	Hs4503223	[Q] KOG0156 Cytochrome P450 CYP2 subfamily	sp|P30437|CP17A_ONCMY	Steroid 17-alpha-hydroxylase/17,20 lyase OS=Oncorhynchus mykiss GN=cyp17a1 PE=2 SV=1	GO:0016491 ;GO:0005488	CYP17A	CYP17
Zoff497858	B	790	0	0	5	0	0	0	0	0	0	0	0	0	0	0	0.25	0	0	0	0	0	0	0	0	0	0.0833333	0	0	0	gi|598052943|ref|XP_007355844.1|	cytochrome P450 [Auricularia delicata TFB-10046 SS5]	afv:AFLA_073130	cytochrome P450 oxidoreductase OrdA-like, putative	Hs19743565	[Q] KOG0156 Cytochrome P450 CYP2 subfamily	sp|B8NHY4|ORDA_ASPFN	O-methylsterigmatocystin oxidoreductase OS=Aspergillus flavus (strain ATCC 200026 / FGSC A1120 / NRRL 3357 / JCM 12722 / SRRC 167) GN=ordA PE=2 SV=1	--	CYP	CYP
Zoff498262	A	532	0	0	0	0	0	0	0	0	0	5	0	0	0	0	0	0	0	0	0	0	0	0.25	0	0	0	0	0	0.0833333	gi|587678623|gb|EWZ00941.1|	bifunctional P-450:NADPH-P450 reductase [Fusarium oxysporum FOSC 3-a]	fgr:FG01972.1	C505_FUSOX Bifunctional P-450:NADPH-P450 reductase (Fatty acid omega-hydroxylase) (P450foxy); K14338 cytochrome P450 / NADPH-cytochrome P450 reductase [EC:1.14.14.1 1.6.2.4]	Hs4503233	[Q] KOG0158 Cytochrome P450 CYP3/CYP5/CYP6/CYP9 subfamilies	sp|Q9Y8G7|C505_FUSOX	Bifunctional P-450:NADPH-P450 reductase OS=Fusarium oxysporum GN=CYP505 PE=1 SV=1	GO:0003958 ;GO:0005506 ;GO:0010181 ;GO:0020037 ;GO:0016020 ;GO:0070330 ;GO:0055114	CYP505	CYP505
Zoff498440	A	875	0	0	0	0	0	0	0	0	0	8	0	0	0	0	0	0	0	0	0	0	0	0.4	0	0	0	0	0	0.133333	gi|682384941|gb|KFY67069.1|	hypothetical protein V496_01759 [Pseudogymnoascus pannorum VKM F-4515 (FW-2607)]	pcs:Pc22g07520	Pc22g07520	YMR015c	[QI] KOG0157 Cytochrome P450 CYP4/CYP19/CYP26 subfamilies	sp|P54781|ERG5_YEAST	Cytochrome P450 61 OS=Saccharomyces cerevisiae (strain ATCC 204508 / S288c) GN=ERG5 PE=1 SV=1	GO:0020037 ;GO:0016705 ;GO:0004497 ;GO:0005506 ;GO:0055114	CYP61	CYP61
Zoff499121	A	339	0	0	0	1	0	0	0	0	0	0	0	0	0	0	0	0.05	0	0	0	0	0	0	0	0	0	0.0166667	0	0	gi|662505852|gb|KEQ63464.1|	putative cytochrome P450 [Aureobasidium melanogenum CBS 110374]	ani:AN8358.2	hypothetical protein	At1g74540	[Q] KOG0156 Cytochrome P450 CYP2 subfamily	sp|O13345|ORDA_ASPPA	O-methylsterigmatocystin oxidoreductase OS=Aspergillus parasiticus GN=ordA PE=1 SV=1	GO:0020037 ;GO:0005506 ;GO:0036202 ;GO:0047085 ;GO:0055114 ;GO:0050592	CYP	CYP
Zoff499162	A	577	1	0	4	0	0	1	0	0	0	0	0	0	0.05	0	0.2	0	0	0.05	0	0	0	0	0	0	0.0833333	0.0166667	0	0	gi|590058855|gb|EXK86379.1|	hypothetical protein FOQG_09651 [Fusarium oxysporum f. sp. raphani 54005]	ani:AN5433.2	hypothetical protein	At5g25130	[Q] KOG0156 Cytochrome P450 CYP2 subfamily	sp|Q12645|PID9_FUSSO	Pisatin demethylase OS=Fusarium solani subsp. pisi GN=PDAT9 PE=3 SV=1	GO:0005488 ;GO:0008152	CYP	CYP
Zoff499207	C	557	0	2	1	0	1	0	1	0	0	1	0	0	0	0.11	0.05	0	0.05	0	0.05	0	0	0.05	0	0	0.0533333	0.0166667	0.0166667	0.0166667	gi|598043383|ref|XP_007351064.1|	cytochrome P450 oxidoreductase [Auricularia delicata TFB-10046 SS5]	scm:SCHCODRAFT_75223	hypothetical protein; K00327 NADPH-ferrihemoprotein reductase [EC:1.6.2.4]	YHR042w	[C] KOG1158 NADP/FAD dependent oxidoreductase	sp|Q9HDG2|NCPR_PHACH	NADPH--cytochrome P450 reductase OS=Phanerochaete chrysosporium GN=CPR PE=2 SV=1	GO:0005506 ;GO:0003958 ;GO:0055114 ;GO:0010181	CYP	CYP
Zoff499329	B	589	0	0	0	0	0	0	0	0	0	0	0	0	0	0	0	0	0	0	0	0	0	0	0	0	0	0	0	0	gi|694999984|ref|XP_009409655.1|	PREDICTED: cytochrome P450 71A1-like [Musa acuminata subsp. malaccensis]	ath:AT3G48280	CYP71A25; electron carrier/ heme binding / iron ion binding / monooxygenase/ oxygen binding	At4g13310	[Q] KOG0156 Cytochrome P450 CYP2 subfamily	sp|Q9STK8|C71AP_ARATH	Cytochrome P450 71A25 OS=Arabidopsis thaliana GN=CYP71A25 PE=2 SV=1	GO:0046872 ;GO:0016491 ;GO:0005794 ;GO:0005576 ;GO:0019825	CYP71A	CYP71
Zoff499330	B	586	0	0	0	1	0	0	2	1	0	1	0	4	0	0	0	0.05	0	0	0.1	0.05	0	0.05	0	0.2	0	0.0166667	0.05	0.0833333	gi|694999984|ref|XP_009409655.1|	PREDICTED: cytochrome P450 71A1-like [Musa acuminata subsp. malaccensis]	ath:AT3G48280	CYP71A25; electron carrier/ heme binding / iron ion binding / monooxygenase/ oxygen binding	At4g13310	[Q] KOG0156 Cytochrome P450 CYP2 subfamily	sp|Q9STK8|C71AP_ARATH	Cytochrome P450 71A25 OS=Arabidopsis thaliana GN=CYP71A25 PE=2 SV=1	GO:0046872 ;GO:0005794 ;GO:0004497 ;GO:0016705 ;GO:0005576 ;GO:0019825	CYP71A	CYP71
Zoff499536	A	617	0	0	2	1	0	1	0	0	0	1	0	0	0	0	0.1	0.05	0	0.05	0	0	0	0.05	0	0	0.0333333	0.0333333	0	0.0166667	gi|367022762|ref|XP_003660666.1|	C-22 sterol desaturase [Myceliophthora thermophila ATCC 42464]	ncr:NCU05278	cytochrome P450 61	YMR015c	[QI] KOG0157 Cytochrome P450 CYP4/CYP19/CYP26 subfamilies	sp|P54781|ERG5_YEAST	Cytochrome P450 61 OS=Saccharomyces cerevisiae (strain ATCC 204508 / S288c) GN=ERG5 PE=1 SV=1	GO:0000249 ;GO:0004497 ;GO:0005506 ;GO:0020037 ;GO:0006696 ;GO:0005783 ;GO:0055114	CYP61	CYP61
Zoff499702	B	564	0	0	0	0	0	3	0	0	0	0	0	0	0	0	0	0	0	0.15	0	0	0	0	0	0	0	0.05	0	0	gi|567988826|gb|ETL39097.1|	hypothetical protein L916_09494 [Phytophthora parasitica]	pif:PITG_14013	cytochrome P450, putative	At4g00360	[QI] KOG0157 Cytochrome P450 CYP4/CYP19/CYP26 subfamilies	sp|O23066|C86A2_ARATH	Cytochrome P450 86A2 OS=Arabidopsis thaliana GN=CYP86A2 PE=1 SV=1	GO:0046872 ;GO:0016491	CYP86A	CYP86
Zoff501952	A	422	0	1	0	0	1	0	0	1	0	0	0	0	0	0.06	0	0	0.05	0	0	0.05	0	0	0	0	0.02	0.0166667	0.0166667	0	gi|695004257|ref|XP_009388531.1|	PREDICTED: cytochrome P450 734A6-like [Musa acuminata subsp. malaccensis]	sbi:SORBI_03g004210	hypothetical protein	At2g26710	[QI] KOG0157 Cytochrome P450 CYP4/CYP19/CYP26 subfamilies	sp|B9X287|C7346_ORYSJ	Cytochrome P450 734A6 OS=Oryza sativa subsp. japonica GN=CYP734A6 PE=2 SV=1	GO:0010268 ;GO:0016131 ;GO:0004497 ;GO:0005506 ;GO:0020037 ;GO:0016705 ;GO:0016021 ;GO:0040008 ;GO:0055114	CYP734A	CYP734
Zoff503121	A	375	0	0	0	0	0	0	0	0	0	2	0	0	0	0	0	0	0	0	0	0	0	0.1	0	0	0	0	0	0.0333333	gi|672794049|gb|KFH44627.1|	Pisatin demethylase-like protein [Acremonium chrysogenum ATCC 11550]	nfi:NFIA_055060	benzoate 4-monooxygenase cytochrome P450	--	--	sp|P38364|PID6_FUSSO	Pisatin demethylase OS=Fusarium solani subsp. pisi GN=PDA6-1 PE=3 SV=1	GO:0020037 ;GO:0016705 ;GO:0004497 ;GO:0005506 ;GO:0055114	CYP	CYP
Zoff503130	A	527	0	1	0	0	0	0	0	0	0	3	0	0	0	0.06	0	0	0	0	0	0	0	0.15	0	0	0.02	0	0	0.05	gi|590022531|gb|EXK24389.1|	hypothetical protein FOMG_18884 [Fusarium oxysporum f. sp. melonis 26406]	pcs:Pc21g10830	Pc21g10830	7303744	[Q] KOG0159 Cytochrome P450 CYP11/CYP12/CYP24/CYP27 subfamilies	sp|O13317|TRI11_FUSSP	Isotrichodermin C-15 hydroxylase OS=Fusarium sporotrichioides GN=TRI11 PE=3 SV=1	GO:0020037 ;GO:0016705 ;GO:0004497 ;GO:0005506 ;GO:0055114	CYP	CYP
Zoff503194	A	500	0	0	0	0	0	0	0	0	0	5	0	0	0	0	0	0	0	0	0	0	0	0.25	0	0	0	0	0	0.0833333	gi|591443327|gb|EXL75893.1|	hypothetical protein FOPG_09229 [Fusarium oxysporum f. sp. conglutinans race 2 54008]	ani:AN8411.2	hypothetical protein	CE01656	[Q] KOG0158 Cytochrome P450 CYP3/CYP5/CYP6/CYP9 subfamilies	sp|Q12588|CP52J_CANMA	Cytochrome P450 52A10 OS=Candida maltosa GN=CYP52A10 PE=2 SV=1	GO:0020037 ;GO:0016712 ;GO:0005506 ;GO:0055114 ;GO:0010181	CYP52A	CYP52
Zoff504685	B	528	0	0	0	2	0	4	0	0	0	0	0	0	0	0	0	0.1	0	0.2	0	0	0	0	0	0	0	0.1	0	0	gi|675167847|ref|XP_008892808.1|	hypothetical protein PPTG_01316 [Phytophthora parasitica INRA-310]	pif:PITG_14013	cytochrome P450, putative	At5g23190	[QI] KOG0157 Cytochrome P450 CYP4/CYP19/CYP26 subfamilies	sp|Q9FMY1|C86B1_ARATH	Cytochrome P450 86B1 OS=Arabidopsis thaliana GN=CYP86B1 PE=2 SV=1	GO:0046872 ;GO:0016491	CYP86B	CYP86
Zoff505508	A	446	3	0	0	0	0	0	0	0	0	0	0	0	0.15	0	0	0	0	0	0	0	0	0	0	0	0.05	0	0	0	gi|675388676|gb|KFM81573.1|	Cytochrome P450 3A29, partial [Stegodyphus mimosarum]	dre:792041	tbxas1, MGC136708, wu:fk19d08, zgc:136708; thromboxane A synthase 1 (platelet, cytochrome P450, family 5, subfamily A) (EC:5.3.99.5); K01832 cytochrome P450, family 5, subfamily A (thromboxane-A synthase) [EC:5.3.99.5]	Hs13435386	[Q] KOG0158 Cytochrome P450 CYP3/CYP5/CYP6/CYP9 subfamilies	sp|Q964R0|CP6K1_BLAGE	Cytochrome P450 6k1 OS=Blattella germanica GN=CYP6K1 PE=2 SV=1	GO:0016705 ;GO:0004497	CYP3A	CYP3
Zoff505708	A	468	0	0	0	0	0	0	0	1	0	0	0	2	0	0	0	0	0	0	0	0.05	0	0	0	0.1	0	0	0.0166667	0.0333333	gi|648166526|gb|KDR80199.1|	hypothetical protein GALMADRAFT_242488 [Galerina marginata CBS 339.88]	lbc:LACBIDRAFT_291185	cytochrome P450 monooxygenase; K07824 benzoate 4-monooxygenase [EC:1.14.13.12]	CE01655	[Q] KOG0158 Cytochrome P450 CYP3/CYP5/CYP6/CYP9 subfamilies	sp|P17549|CP53_ASPNG	Benzoate 4-monooxygenase OS=Aspergillus niger GN=bphA PE=1 SV=1	GO:0020037 ;GO:0016705 ;GO:0004497 ;GO:0005506 ;GO:0055114	CYP	CYP
Zoff506903	A	748	3	0	0	0	0	0	1	0	0	0	0	1	0.15	0	0	0	0	0	0.05	0	0	0	0	0.05	0.05	0	0.0166667	0.0166667	gi|595492868|gb|EXX76107.1|	Dit2p [Rhizophagus irregularis DAOM 197198w]	isc:IscW_ISCW001475	cytochrome P450, putative (EC:1.14.14.1)	7290280	[QI] KOG0157 Cytochrome P450 CYP4/CYP19/CYP26 subfamilies	sp|Q27589|CP4D2_DROME	Cytochrome P450 4d2 OS=Drosophila melanogaster GN=Cyp4d2 PE=2 SV=2	GO:0016491	CYP71A	CYP71
Zoff507053	A	692	4	0	0	0	0	0	0	0	0	0	0	0	0.2	0	0	0	0	0	0	0	0	0	0	0	0.0666667	0	0	0	gi|283767094|gb|ADB28858.1|	cytochrome P450 CYP15A1-like protein, partial [Tigriopus japonicus]	mmu:230459	Cyp2j13; cytochrome P450, family 2, subfamily j, polypeptide 13; K07418 cytochrome P450, family 2, subfamily J [EC:1.14.14.1]	Hs18491008	[Q] KOG0156 Cytochrome P450 CYP2 subfamily	sp|P51590|CP2J3_RAT	Cytochrome P450 2J3 OS=Rattus norvegicus GN=Cyp2j3 PE=2 SV=1	--	CYP15A	CYP15
Zoff510602	A	368	1	0	1	0	0	1	0	0	0	0	0	0	0.05	0	0.05	0	0	0.05	0	0	0	0	0	0	0.0333333	0.0166667	0	0	gi|598041585|ref|XP_007350165.1|	cytochrome P450 [Auricularia delicata TFB-10046 SS5]	aor:AOR_1_2516154	AO090003001429; cytochrome p450	--	--	--	--	--	CYP7B	CYP7
Zoff510906	C	365	0	0	1	0	0	0	0	0	0	0	0	0	0	0	0.05	0	0	0	0	0	0	0	0	0	0.0166667	0	0	0	gi|146094208|ref|XP_001467215.1|	cytochrome p450-like protein [Leishmania infantum JPCM5]	lif:LinJ30.4040	cytochrome p450-like protein (EC:1.14.14.-)	At2g28860	[QI] KOG0157 Cytochrome P450 CYP4/CYP19/CYP26 subfamilies	sp|Q9ZV28|C7104_ARATH	Cytochrome P450 710A1 OS=Arabidopsis thaliana GN=CYP710A4 PE=2 SV=1	GO:0020037 ;GO:0016705 ;GO:0004497 ;GO:0005506 ;GO:0055114	CYP710A	CYP710
Zoff511864	D	421	0	0	0	0	0	0	2	0	0	0	0	0	0	0	0	0	0	0	0.1	0	0	0	0	0	0	0	0.0333333	0	gi|576994315|gb|EUC66964.1|	cytochrome P450 family protein [Rhizoctonia solani AG-3 Rhs1AP]	rcu:RCOM_0126690	cytochrome P450, putative (EC:1.3.3.9)	Hs4503211	[Q] KOG0159 Cytochrome P450 CYP11/CYP12/CYP24/CYP27 subfamilies	sp|Q9DBG1|CP27A_MOUSE	Sterol 26-hydroxylase, mitochondrial OS=Mus musculus GN=Cyp27a1 PE=1 SV=1	GO:0020037 ;GO:0016705 ;GO:0004497 ;GO:0005506 ;GO:0055114	CYP89A	CYP89
Zoff512168	C	367	0	2	1	0	0	0	0	0	0	0	0	0	0	0.11	0.05	0	0	0	0	0	0	0	0	0	0.0533333	0	0	0	gi|685400071|ref|XP_009218896.1|	NADPH-cytochrome P450 reductase [Gaeumannomyces graminis var. tritici R3-111a-1]	ncr:NCU09741	NADPH-cytochrome P450 reductase; K00327 NADPH-ferrihemoprotein reductase [EC:1.6.2.4]	SPBC365.17	[C] KOG1158 NADP/FAD dependent oxidoreductase	sp|A2QS05|NCPR_ASPNC	NADPH--cytochrome P450 reductase OS=Aspergillus niger (strain CBS 513.88 / FGSC A1513) GN=cprA PE=3 SV=1	GO:0005789 ;GO:0003958 ;GO:0005506 ;GO:0010181 ;GO:0055114	CYP	CYP
Zoff513099	B	387	1	1	0	0	0	0	0	1	0	0	0	0	0.05	0.06	0	0	0	0	0	0.05	0	0	0	0	0.0366667	0	0.0166667	0	gi|695551548|ref|XP_009545907.1|	NADPH cytochrome P450 reductase [Heterobasidion irregulare TC 32-1]	mpr:MPER_02624	hypothetical protein ; K00327 NADPH-ferrihemoprotein reductase [EC:1.6.2.4]	SPBC365.17	[C] KOG1158 NADP/FAD dependent oxidoreductase	sp|Q9HDG2|NCPR_PHACH	NADPH--cytochrome P450 reductase OS=Phanerochaete chrysosporium GN=CPR PE=2 SV=1	GO:0005789 ;GO:0003958 ;GO:0005506 ;GO:0010181 ;GO:0016021 ;GO:0055114	CYP	CYP
Zoff513100	A	1776	0	3	118	1	2	0	1	1	0	1	2	4	0	0.17	5.85	0.05	0.1	0	0.05	0.05	0	0.05	0.1	0.2	2.00667	0.05	0.0333333	0.116667	gi|628349094|ref|XP_007750064.1|	hypothetical protein A1O5_11302 [Cladophialophora psammophila CBS 110553]	nfi:NFIA_047320	Cytochrome P450 oxidoreductase, putative	At2g45560	[Q] KOG0156 Cytochrome P450 CYP2 subfamily	sp|Q9YH64|CP1A1_PLAFE	Cytochrome P450 1A1 OS=Platichthys flesus GN=cyp1a1 PE=3 SV=1	GO:0020037 ;GO:0016705 ;GO:0005506 ;GO:0055114	CYP1A	CYP1
Zoff513186	C	328	0	0	0	0	1	1	0	0	0	0	0	0	0	0	0	0	0.05	0.05	0	0	0	0	0	0	0	0.0333333	0	0	gi|443923008|gb|ELU42337.1|	fatty acid hydroxylase, putative [Rhizoctonia solani AG-1 IA]	fgr:FG01972.1	C505_FUSOX Bifunctional P-450:NADPH-P450 reductase (Fatty acid omega-hydroxylase) (P450foxy); K14338 cytochrome P450 / NADPH-cytochrome P450 reductase [EC:1.14.14.1 1.6.2.4]	7297099	[C] KOG1158 NADP/FAD dependent oxidoreductase	sp|Q9Y8G7|C505_FUSOX	Bifunctional P-450:NADPH-P450 reductase OS=Fusarium oxysporum GN=CYP505 PE=1 SV=1	GO:0003958 ;GO:0005506 ;GO:0010181 ;GO:0020037 ;GO:0008270 ;GO:0070330 ;GO:0055114	CYP505	CYP505
Zoff513809	A	369	1	0	0	0	0	0	0	0	0	0	0	2	0.05	0	0	0	0	0	0	0	0	0	0	0.1	0.0166667	0	0	0.0333333	gi|313150272|dbj|BAJ39894.1|	P450 mono-oxygenase [Zingiber zerumbet]	--	--	--	--	--	--	--	CYP	CYP
Zoff513940	A	408	1	0	0	2	0	1	0	0	0	0	0	0	0.05	0	0	0.1	0	0.05	0	0	0	0	0	0	0.0166667	0.05	0	0	gi|660959563|gb|KEP46676.1|	putative cytochrome P450 family protein, partial [Rhizoctonia solani 123E]	ppl:POSPLDRAFT_94845	hypothetical protein	--	--	--	--	GO:0016772 ;GO:0005525 ;GO:0006184 ;GO:0003924	CYP	CYP
Zoff514522	C	1715	4	0	0	0	3	0	1	30	4	2	0	1	0.2	0	0	0	0.16	0	0.05	1.5	0.2	0.1	0	0.05	0.0666667	0.0533333	0.583333	0.05	gi|367028646|ref|XP_003663607.1|	hypothetical protein MYCTH_2049011, partial [Myceliophthora thermophila ATCC 42464]	ani:AN2727.2	hypothetical protein	At5g57220	[Q] KOG0156 Cytochrome P450 CYP2 subfamily	sp|Q8VWZ7|C76B6_CATRO	Geraniol 8-hydroxylase OS=Catharanthus roseus GN=CYP76B6 PE=1 SV=1	--	CYP76B	CYP76
Zoff520170	D	809	0	0	0	0	0	0	0	0	0	6	0	0	0	0	0	0	0	0	0	0	0	0.3	0	0	0	0	0	0.1	gi|596685232|ref|XP_007279625.1|	cytochrome p450 [Colletotrichum gloeosporioides Nara gc5]	ncr:NCU05848	hypothetical protein	At2g14100	[Q] KOG0156 Cytochrome P450 CYP2 subfamily	sp|Q12645|PID9_FUSSO	Pisatin demethylase OS=Fusarium solani subsp. pisi GN=PDAT9 PE=3 SV=1	GO:0046872 ;GO:0008152 ;GO:0016491	CYP	CYP
Zoff527348	A	441	0	3	0	0	0	0	0	0	0	0	0	0	0	0.17	0	0	0	0	0	0	0	0	0	0	0.0566667	0	0	0	gi|658297108|gb|KEI65503.1|	cytochrome P450 [Planktothrix agardhii NIVA-CYA 126/8]	ecb:100051131	similar to cytochrome P450, family 46, subfamily A, polypeptide 1; K07440 cytochrome P450, family 46, subfamily A (cholesterol 24(S)-hydroxylase) [EC:1.14.13.98]	Hs5729796	[QI] KOG0157 Cytochrome P450 CYP4/CYP19/CYP26 subfamilies	sp|Q9WVK8|CP46A_MOUSE	Cholesterol 24-hydroxylase OS=Mus musculus GN=Cyp46a1 PE=2 SV=1	GO:0016491 ;GO:0005488	CYP46A	CYP46
Zoff527464	A	393	0	0	2	0	0	0	0	0	0	0	0	0	0	0	0.1	0	0	0	0	0	0	0	0	0	0.0333333	0	0	0	gi|671170948|ref|XP_008725940.1|	hypothetical protein G647_03373 [Cladophialophora carrionii CBS 160.54]	afv:AFLA_127500	cytochrome P450, putative; K14338 cytochrome P450 / NADPH-cytochrome P450 reductase [EC:1.14.14.1 1.6.2.4]	--	--	sp|Q9Y8G7|C505_FUSOX	Bifunctional P-450:NADPH-P450 reductase OS=Fusarium oxysporum GN=CYP505 PE=1 SV=1	GO:0003958 ;GO:0005506 ;GO:0010181 ;GO:0020037 ;GO:0070330 ;GO:0055114	CYP505	CYP505
Zoff530827	A	685	0	0	0	0	0	0	0	0	0	0	0	0	0	0	0	0	0	0	0	0	0	0	0	0	0	0	0	0	gi|167521978|ref|XP_001745327.1|	hypothetical protein [Monosiga brevicollis MX1]	mbr:MONBRDRAFT_7625	hypothetical protein	At2g27690	[QI] KOG0157 Cytochrome P450 CYP4/CYP19/CYP26 subfamilies	sp|Q9ZUX1|C94C1_ARATH	Cytochrome P450 94C1 OS=Arabidopsis thaliana GN=CYP94C1 PE=2 SV=1	--	CYP94C	CYP94
Zoff530828	A	738	0	0	0	0	0	0	0	0	0	0	0	5	0	0	0	0	0	0	0	0	0	0	0	0.25	0	0	0	0.0833333	gi|167521978|ref|XP_001745327.1|	hypothetical protein [Monosiga brevicollis MX1]	mbr:MONBRDRAFT_7625	hypothetical protein	At2g27690	[QI] KOG0157 Cytochrome P450 CYP4/CYP19/CYP26 subfamilies	sp|Q9ZUX1|C94C1_ARATH	Cytochrome P450 94C1 OS=Arabidopsis thaliana GN=CYP94C1 PE=2 SV=1	--	CYP94C	CYP94
Zoff531157	C	530	0	0	0	0	0	0	0	0	0	0	0	4	0	0	0	0	0	0	0	0	0	0	0	0.2	0	0	0	0.0666667	gi|657818286|ref|XP_008336093.1|	PREDICTED: cytochrome P450 4V2-like [Cynoglossus semilaevis]	phu:Phum_PHUM371370	cytochrome P-450, putative (EC:1.14.15.3); K07427 cytochrome P450, family 4, subfamily V	CE02952	[QI] KOG0157 Cytochrome P450 CYP4/CYP19/CYP26 subfamilies	sp|Q6ZWL3|CP4V2_HUMAN	Cytochrome P450 4V2 OS=Homo sapiens GN=CYP4V2 PE=1 SV=2	GO:0046872 ;GO:0016705 ;GO:0004497	CYP4V	CYP4
Zoff531704	D	1178	0	1	0	1	5	1	2	3	1	1	0	0	0	0.06	0	0.05	0.26	0.05	0.1	0.15	0.05	0.05	0	0	0.02	0.12	0.1	0.0166667	gi|656914584|gb|KEF60164.1|	hypothetical protein A1O9_05014 [Exophiala aquamarina CBS 119918]	pno:SNOG_10960	hypothetical protein	7296954	[Q] KOG0158 Cytochrome P450 CYP3/CYP5/CYP6/CYP9 subfamilies	sp|P38364|PID6_FUSSO	Pisatin demethylase OS=Fusarium solani subsp. pisi GN=PDA6-1 PE=3 SV=1	GO:0006351 ;GO:0003677 ;GO:0004497 ;GO:0005506 ;GO:0020037 ;GO:0016705 ;GO:0005634 ;GO:0008270 ;GO:0055114	CYP	CYP
Zoff532929	A	497	1	0	0	0	1	0	0	2	1	0	0	0	0.05	0	0	0	0.05	0	0	0.1	0.05	0	0	0	0.0166667	0.0166667	0.05	0	gi|628350083|ref|XP_007750378.1|	hypothetical protein A1O5_11616 [Cladophialophora psammophila CBS 110553]	mgr:MGG_04911	MG04911.4; hypothetical protein	At5g52400	[QI] KOG0157 Cytochrome P450 CYP4/CYP19/CYP26 subfamilies	sp|Q2QYH7|C14C2_ORYSJ	Cytochrome P450 714C2 OS=Oryza sativa subsp. japonica GN=CYP714C2 PE=2 SV=1	GO:0019748 ;GO:0016491 ;GO:0005488	CYP714C	CYP714
Zoff533150	C	529	1	0	6	0	0	0	0	0	0	0	0	0	0.05	0	0.3	0	0	0	0	0	0	0	0	0	0.116667	0	0	0	gi|628336200|ref|XP_007745944.1|	hypothetical protein A1O5_07165 [Cladophialophora psammophila CBS 110553]	ang:ANI_1_2176064	An07g09880; cytochrome P450 monooxygenase	7303744	[Q] KOG0159 Cytochrome P450 CYP11/CYP12/CYP24/CYP27 subfamilies	--	--	GO:0016705 ;GO:0004497 ;GO:0097159 ;GO:0030448 ;GO:1901363	CYP	CYP
Zoff534617	A	633	0	0	0	0	0	0	0	0	0	0	0	7	0	0	0	0	0	0	0	0	0	0	0	0.35	0	0	0	0.116667	gi|308455791|ref|XP_003090396.1|	hypothetical protein CRE_23203 [Caenorhabditis remanei]	cbr:CBG01773	Cbr-cyp-31A3; C. briggsae CBR-CYP-31A3 protein; K07427 cytochrome P450, family 4, subfamily V	CE24183	[QI] KOG0157 Cytochrome P450 CYP4/CYP19/CYP26 subfamilies	sp|Q9DBW0|CP4V2_MOUSE	Cytochrome P450 4V2 OS=Mus musculus GN=Cyp4v2 PE=1 SV=1	GO:0040038 ;GO:0008610 ;GO:0048598 ;GO:0046872 ;GO:0016491 ;GO:0008356 ;GO:0030703	CYP4V	CYP4
Zoff534959	C	559	0	0	6	1	0	0	0	0	0	0	0	0	0	0	0.3	0.05	0	0	0	0	0	0	0	0	0.1	0.0166667	0	0	gi|628332599|ref|XP_007744827.1|	hypothetical protein A1O5_06041 [Cladophialophora psammophila CBS 110553]	mgr:MGG_07626	MG07626.4; cytochrome P450 monooxygenase, putative	At1g57750	[QI] KOG0157 Cytochrome P450 CYP4/CYP19/CYP26 subfamilies	sp|Q12645|PID9_FUSSO	Pisatin demethylase OS=Fusarium solani subsp. pisi GN=PDAT9 PE=3 SV=1	GO:0004497 ;GO:0005506 ;GO:0020037 ;GO:0016705 ;GO:0055114	CYP	CYP
Zoff535192	D	1042	0	0	0	1	0	9	0	0	0	0	0	0	0	0	0	0.05	0	0.44	0	0	0	0	0	0	0	0.163333	0	0	gi|325182055|emb|CCA16508.1|	unnamed protein product [Albugo laibachii Nc14]	pif:PITG_13865	cytochrome P450, putative	At1g34540	[QI] KOG0157 Cytochrome P450 CYP4/CYP19/CYP26 subfamilies	sp|O23066|C86A2_ARATH	Cytochrome P450 86A2 OS=Arabidopsis thaliana GN=CYP86A2 PE=1 SV=1	--	CYP86A	CYP86
Zoff536035	B	1107	2	0	0	0	3	0	2	5	1	1	0	1	0.1	0	0	0	0.16	0	0.1	0.25	0.05	0.05	0	0.05	0.0333333	0.0533333	0.133333	0.0333333	gi|695059876|ref|XP_009418311.1|	PREDICTED: cytochrome P450 94B3-like [Musa acuminata subsp. malaccensis]	rcu:RCOM_1354140	cytochrome P450, putative (EC:1.14.14.1)	At3g56630	[QI] KOG0157 Cytochrome P450 CYP4/CYP19/CYP26 subfamilies	sp|O81117|C94A1_VICSA	Cytochrome P450 94A1 OS=Vicia sativa GN=CYP94A1 PE=2 SV=2	GO:0016491	CYP94A	CYP94
Zoff536570	C	365	0	0	0	0	0	0	0	0	1	0	0	0	0	0	0	0	0	0	0	0	0.05	0	0	0	0	0	0.0166667	0	gi|639567128|gb|KDN44615.1|	hypothetical protein RSAG8_05380, partial [Rhizoctonia solani AG-8 WAC10335]	cci:CC1G_11454	cytochrome P450	--	--	sp|B8NHY4|ORDA_ASPFN	O-methylsterigmatocystin oxidoreductase OS=Aspergillus flavus (strain ATCC 200026 / FGSC A1120 / NRRL 3357 / JCM 12722 / SRRC 167) GN=ordA PE=2 SV=1	GO:0020037 ;GO:0016705 ;GO:0004497 ;GO:0005506 ;GO:0055114	CYP	CYP
Zoff536657	D	341	0	0	0	0	0	0	0	0	0	0	0	2	0	0	0	0	0	0	0	0	0	0	0	0.1	0	0	0	0.0333333	gi|169844541|ref|XP_001828991.1|	C-22 sterol desaturase [Coprinopsis cinerea okayama7#130]	cci:CC1G_01671	C-22 sterol desaturase; K09831 C-22 sterol desaturase [EC:1.14.14.-]	SPAC19A8.04	[QI] KOG0157 Cytochrome P450 CYP4/CYP19/CYP26 subfamilies	sp|O13820|ERG5_SCHPO	Cytochrome P450 61 OS=Schizosaccharomyces pombe (strain 972 / ATCC 24843) GN=erg5 PE=1 SV=3	GO:0004497 ;GO:0005506 ;GO:0020037 ;GO:0016705 ;GO:0055114	CYP61	CYP61
Zoff537582	A	678	2	4	0	1	0	0	0	2	0	1	0	0	0.1	0.23	0	0.05	0	0	0	0.1	0	0.05	0	0	0.11	0.0166667	0.0333333	0.0166667	gi|684163633|ref|XP_009155692.1|	cytochrome P450 oxidoreductase [Exophiala dermatitidis NIH/UT8656]	afv:AFLA_010950	cytochrome P450 oxidoreductase, putative	7290275	[QI] KOG0157 Cytochrome P450 CYP4/CYP19/CYP26 subfamilies	sp|Q12645|PID9_FUSSO	Pisatin demethylase OS=Fusarium solani subsp. pisi GN=PDAT9 PE=3 SV=1	GO:0020037 ;GO:0016705 ;GO:0004497 ;GO:0005506 ;GO:0055114	CYP	CYP
Zoff537706	C	641	0	0	0	0	0	0	0	0	0	0	0	3	0	0	0	0	0	0	0	0	0	0	0	0.15	0	0	0	0.05	gi|336265026|ref|XP_003347287.1|	hypothetical protein SMAC_07143 [Sordaria macrospora k-hell]	ncr:NCU05185	bifunctional P-450:NADPH-P450 reductase; K14338 cytochrome P450 / NADPH-cytochrome P450 reductase [EC:1.14.14.1 1.6.2.4]	At4g30210	[C] KOG1158 NADP/FAD dependent oxidoreductase	sp|Q9Y8G7|C505_FUSOX	Bifunctional P-450:NADPH-P450 reductase OS=Fusarium oxysporum GN=CYP505 PE=1 SV=1	GO:0003958 ;GO:0005506 ;GO:0010181 ;GO:0020037 ;GO:0016020 ;GO:0070330 ;GO:0055114	CYP505	CYP505
Zoff538190	A	549	0	0	2	0	0	0	0	0	0	1	0	1	0	0	0.1	0	0	0	0	0	0	0.05	0	0.05	0.0333333	0	0	0.0333333	gi|628254741|ref|XP_007729327.1|	hypothetical protein A1O3_00988 [Capronia epimyces CBS 606.96]	act:ACLA_072970	Cytochrome P450 oxidoreductase, putative	Hs10834998	[Q] KOG0156 Cytochrome P450 CYP2 subfamily	sp|B8NHY4|ORDA_ASPFN	O-methylsterigmatocystin oxidoreductase OS=Aspergillus flavus (strain ATCC 200026 / FGSC A1120 / NRRL 3357 / JCM 12722 / SRRC 167) GN=ordA PE=2 SV=1	GO:0016491 ;GO:0005488	CYP	CYP
Zoff540372	D	573	2	1	0	0.5	0	0	0	0	0	0	0	0	0.1	0.06	0	0.03	0	0	0	0	0	0	0	0	0.0533333	0.01	0	0	gi|660959563|gb|KEP46676.1|	putative cytochrome P450 family protein, partial [Rhizoctonia solani 123E]	ppl:POSPLDRAFT_94845	hypothetical protein	--	--	--	--	GO:0044763 ;GO:0032550 ;GO:0035639 ;GO:0016787 ;GO:0006796 ;GO:0032555 ;GO:0044238 ;GO:0044281 ;GO:1901564	CYP	CYP
Zoff540373	D	573	0	0	0	0.5	0	1	0	0	0	0	0	0	0	0	0	0.03	0	0.05	0	0	0	0	0	0	0	0.0266667	0	0	gi|660959563|gb|KEP46676.1|	putative cytochrome P450 family protein, partial [Rhizoctonia solani 123E]	ppl:POSPLDRAFT_94845	hypothetical protein	--	--	--	--	GO:0044763 ;GO:0032550 ;GO:0016740 ;GO:0035639 ;GO:0006796 ;GO:0032555 ;GO:0044238 ;GO:0044281 ;GO:1901564	CYP	CYP
Zoff540994	A	379	0	0	0	0	0	0	0	0	0	2	0	0	0	0	0	0	0	0	0	0	0	0.1	0	0	0	0	0	0.0333333	gi|587737250|gb|EXA34966.1|	hypothetical protein FOVG_13748 [Fusarium oxysporum f. sp. pisi HDV247]	afv:AFLA_066930	cytochrome P450, putative	--	--	sp|P24458|CP52E_CANMA	Cytochrome P450 52A3-B OS=Candida maltosa GN=CYP52A3-B PE=1 SV=1	GO:0020037 ;GO:0016712 ;GO:0005506 ;GO:0055114	CYP52A	CYP52
Zoff543103	A	504	0	0	0	0	0	0	0	0	0	0	0	3	0	0	0	0	0	0	0	0	0	0	0	0.15	0	0	0	0.05	gi|563291230|gb|ESZ91765.1|	cytochrome P450 monooxygenase [Sclerotinia borealis F-4157]	nfi:NFIA_089120	benzoate 4-monooxygenase cytochrome P450	Hs4503231	[Q] KOG0158 Cytochrome P450 CYP3/CYP5/CYP6/CYP9 subfamilies	sp|O13317|TRI11_FUSSP	Isotrichodermin C-15 hydroxylase OS=Fusarium sporotrichioides GN=TRI11 PE=3 SV=1	GO:0005488 ;GO:0016491	CYP	CYP
Zoff547111	B	360	1	2	3	0	1	2	0	2	0	0	0	0	0.05	0.11	0.15	0	0.05	0.1	0	0.1	0	0	0	0	0.103333	0.05	0.0333333	0	gi|672201200|ref|XP_008778075.1|	PREDICTED: LOW QUALITY PROTEIN: geraniol 8-hydroxylase-like [Phoenix dactylifera]	sbi:SORBI_07g024990	hypothetical protein	At4g12320	[Q] KOG0156 Cytochrome P450 CYP2 subfamily	sp|O64635|C76C4_ARATH	Cytochrome P450 76C4 OS=Arabidopsis thaliana GN=CYP76C4 PE=3 SV=1	GO:0016023 ;GO:0004497 ;GO:0005506 ;GO:0020037 ;GO:0016705 ;GO:0005739 ;GO:0055114	CYP76C	CYP76
Zoff547867	A	356	0	0	0	0	0	0	0	0	0	3	0	0	0	0	0	0	0	0	0	0	0	0.15	0	0	0	0	0	0.05	gi|302926030|ref|XP_003054213.1|	hypothetical protein NECHADRAFT_98771 [Nectria haematococca mpVI 77-13-4]	fgr:FG01048.1	hypothetical protein	CE23108	[QI] KOG0157 Cytochrome P450 CYP4/CYP19/CYP26 subfamilies	sp|Q9DBW0|CP4V2_MOUSE	Cytochrome P450 4V2 OS=Mus musculus GN=Cyp4v2 PE=1 SV=1	GO:0020037 ;GO:0016705 ;GO:0004497 ;GO:0005506 ;GO:0055114	CYP4V	CYP4
Zoff547884	A	352	0	0	0	0	0	1	0	0	0	0	0	0	0	0	0	0	0	0.05	0	0	0	0	0	0	0	0.0166667	0	0	gi|585104043|gb|EWM23162.1|	cytochrome p450 [Nannochloropsis gaditana]	smo:SELMODRAFT_111270	CYP704H1; hypothetical protein	At1g69500	[QI] KOG0157 Cytochrome P450 CYP4/CYP19/CYP26 subfamilies	sp|Q9C788|C70B1_ARATH	Cytochrome P450 704B1 OS=Arabidopsis thaliana GN=CYP704B1 PE=2 SV=1	--	CYP704B	CYP704
Zoff548022	B	635	0	0	0	3	0	5	0	0	0	0	0	0	0	0	0	0.15	0	0.25	0	0	0	0	0	0	0	0.133333	0	0	gi|301101150|ref|XP_002899664.1|	cytochrome P450, putative [Phytophthora infestans T30-4]	pif:PITG_14013	cytochrome P450, putative	At5g08250	[QI] KOG0157 Cytochrome P450 CYP4/CYP19/CYP26 subfamilies	sp|Q9FMY1|C86B1_ARATH	Cytochrome P450 86B1 OS=Arabidopsis thaliana GN=CYP86B1 PE=2 SV=1	GO:0046872 ;GO:0016491	CYP86B	CYP86
Zoff550202	D	395	1	1	2	0	0	0	0	1	0	0	0	0	0.05	0.06	0.1	0	0	0	0	0.05	0	0	0	0	0.07	0	0.0166667	0	gi|695019170|ref|XP_009396574.1|	PREDICTED: cytokinin hydroxylase-like [Musa acuminata subsp. malaccensis]	pop:POPTR_570447	CYP715A2-1; cytochrome P450	At5g52400	[QI] KOG0157 Cytochrome P450 CYP4/CYP19/CYP26 subfamilies	sp|Q6NKZ8|C14A2_ARATH	Cytochrome P450 714A2 OS=Arabidopsis thaliana GN=CYP714A2 PE=2 SV=1	GO:0020037 ;GO:0016705 ;GO:0004497 ;GO:0005506 ;GO:0055114 ;GO:0050616	CYP714A	CYP714
Zoff554651	B	472	2	0	0	0	0	0	0	0	0	0	0	0	0.1	0	0	0	0	0	0	0	0	0	0	0	0.0333333	0	0	0	gi|291234407|ref|XP_002737140.1|	PREDICTED: cytochrome P450 1A5-like [Saccoglossus kowalevskii]	isc:IscW_ISCW022069	cytochrome P-450 IIC4, putative (EC:1.14.14.1)	Hs4503199	[Q] KOG0156 Cytochrome P450 CYP2 subfamily	sp|P05176|CP1A1_RABIT	Cytochrome P450 1A1 OS=Oryctolagus cuniculus GN=CYP1A1 PE=2 SV=1	GO:0016491	CYP1A	CYP1
Zoff556497	C	355	0	0	0	1	0	0	0	0	0	1	0	0	0	0	0	0.05	0	0	0	0	0	0.05	0	0	0	0.0166667	0	0.0166667	gi|640918944|gb|KDN63526.1|	putative cytochrome P450 [Colletotrichum sublineola]	mgr:MGG_10879	MG10879.4; hypothetical protein; K14338 cytochrome P450 / NADPH-cytochrome P450 reductase [EC:1.14.14.1 1.6.2.4]	At3g02280	[C] KOG1159 NADP-dependent flavoprotein reductase	sp|Q9Y8G7|C505_FUSOX	Bifunctional P-450:NADPH-P450 reductase OS=Fusarium oxysporum GN=CYP505 PE=1 SV=1	GO:0020037 ;GO:0005506 ;GO:0003958 ;GO:0070330 ;GO:0055114 ;GO:0010181	CYP505	CYP505
Zoff558671	A	618	0	0	0	0	1	1	0	1	1	0	0	0	0	0	0	0	0.05	0.05	0	0.05	0.05	0	0	0	0	0.0333333	0.0333333	0	gi|628324540|ref|XP_007743124.1|	hypothetical protein A1O5_04327 [Cladophialophora psammophila CBS 110553]	pno:SNOG_15745	hypothetical protein	Hs19743565	[Q] KOG0156 Cytochrome P450 CYP2 subfamily	sp|A1DA63|FTME_NEOFI	Fumitremorgin C synthase OS=Neosartorya fischeri (strain ATCC 1020 / DSM 3700 / FGSC A1164 / NRRL 181) GN=ftmP450-2 PE=3 SV=1	GO:0020037 ;GO:0016705 ;GO:0004497 ;GO:0005506 ;GO:0055114	CYP2	CYP2
Zoff559861	C	405	0	0	0	0	0	5	0	0	0	0	0	0	0	0	0	0	0	0.25	0	0	0	0	0	0	0	0.0833333	0	0	gi|596671744|ref|XP_007277112.1|	cytochrome p450 55a3 [Colletotrichum gloeosporioides Nara gc5]	ncr:NCU06137	cytochrome P450 55A2	--	--	sp|Q12599|NOR2_CYLTO	Cytochrome P450 55A3 OS=Cylindrocarpon tonkinense GN=CYP55A3 PE=3 SV=1	GO:0020037 ;GO:0016705 ;GO:0004497 ;GO:0005506 ;GO:0055114	CYP55A	CYP55
Zoff564393	A	329	2	0	0	0	0	0	0	0	0	0	0	0	0.1	0	0	0	0	0	0	0	0	0	0	0	0.0333333	0	0	0	gi|641666259|ref|XP_008183674.1|	PREDICTED: cytochrome P450 6k1-like [Acyrthosiphon pisum]	aga:AgaP_AGAP008204	AGAP008204-PA	--	--	--	--	GO:0016491 ;GO:0005488	CYP6K	CYP6
Zoff566103	D	408	0	0	0	0	0	0	0	0	0	0	0	1	0	0	0	0	0	0	0	0	0	0	0	0.05	0	0	0	0.0166667	gi|570941402|gb|ETP06659.1|	hypothetical protein, variant 9 [Phytophthora parasitica CJ01A1]	dwi:Dwil_GK14755	GK14755 gene product from transcript GK14755-RA; K00327 NADPH-ferrihemoprotein reductase [EC:1.6.2.4]	7297099	[C] KOG1158 NADP/FAD dependent oxidoreductase	sp|P37039|NCPR_CAVPO	NADPH--cytochrome P450 reductase OS=Cavia porcellus GN=POR PE=2 SV=2	--	CYP	CYP
Zoff566592	A	327	0	0	0	0	0	2	0	0	0	0	0	0	0	0	0	0	0	0.1	0	0	0	0	0	0	0	0.0333333	0	0	gi|301101156|ref|XP_002899667.1|	cytochrome P450, putative [Phytophthora infestans T30-4]	pif:PITG_14016	cytochrome P450, putative	At1g69500	[QI] KOG0157 Cytochrome P450 CYP4/CYP19/CYP26 subfamilies	--	--	--	CYP	CYP
Zoff566653	C	343	0	0	0	0	0	0	0	0	0	2	0	0	0	0	0	0	0	0	0	0	0	0.1	0	0	0	0	0	0.0333333	gi|587700367|gb|EWZ46972.1|	bifunctional P-450:NADPH-P450 reductase [Fusarium oxysporum Fo47]	fgr:FG01972.1	C505_FUSOX Bifunctional P-450:NADPH-P450 reductase (Fatty acid omega-hydroxylase) (P450foxy); K14338 cytochrome P450 / NADPH-cytochrome P450 reductase [EC:1.14.14.1 1.6.2.4]	--	--	sp|Q9Y8G7|C505_FUSOX	Bifunctional P-450:NADPH-P450 reductase OS=Fusarium oxysporum GN=CYP505 PE=1 SV=1	GO:0020037 ;GO:0005506 ;GO:0003958 ;GO:0070330 ;GO:0055114 ;GO:0010181	CYP505	CYP505
Zoff567473	A	876	0.5	0	11	0	0	0	0	0	0	0	0	0	0.02	0	0.55	0	0	0	0	0	0	0	0	0	0.19	0	0	0	gi|656915753|gb|KEF61332.1|	hypothetical protein A1O9_02898 [Exophiala aquamarina CBS 119918]	fgr:FG02113.1	hypothetical protein	At4g27710	[QI] KOG0157 Cytochrome P450 CYP4/CYP19/CYP26 subfamilies	--	--	GO:0016491 ;GO:0005488	CYP	CYP
Zoff567474	A	876	0.5	2	0	0	0	1	0	0	0	0	0	0	0.02	0.11	0	0	0	0.05	0	0	0	0	0	0	0.0433333	0.0166667	0	0	gi|656915753|gb|KEF61332.1|	hypothetical protein A1O9_02898 [Exophiala aquamarina CBS 119918]	fgr:FG02113.1	hypothetical protein	At4g27710	[QI] KOG0157 Cytochrome P450 CYP4/CYP19/CYP26 subfamilies	--	--	GO:0016491 ;GO:0005488	CYP	CYP
Zoff569748	A	625	0	0	1	2	3	1	0	0	0	0	0	0	0	0	0.05	0.1	0.16	0.05	0	0	0	0	0	0	0.0166667	0.103333	0	0	gi|628274918|ref|XP_007731527.1|	cytochrome P450 oxidoreductase [Capronia epimyces CBS 606.96]	ure:UREG_02856	inositolphosphorylceramide-B C-26 hydroxylase	YMR272c_2	[I] KOG0539 Sphingolipid fatty acid hydroxylase	sp|Q03529|SCS7_YEAST	Ceramide very long chain fatty acid hydroxylase SCS7 OS=Saccharomyces cerevisiae (strain ATCC 204508 / S288c) GN=SCS7 PE=1 SV=1	GO:0003723 ;GO:0016021 ;GO:0006633 ;GO:0055114 ;GO:0016491 ;GO:0006665 ;GO:0000166 ;GO:0020037 ;GO:0006397 ;GO:0005506 ;GO:0005783 ;GO:0005634	CYP	CYP
Zoff573484	A	376	2	0	0	0	0	0	0	0	0	0	0	0	0.1	0	0	0	0	0	0	0	0	0	0	0	0.0333333	0	0	0	gi|156353228|ref|XP_001622975.1|	predicted protein [Nematostella vectensis]	nve:NEMVE_v1g231212	hypothetical protein	Hs4503195	[Q] KOG0156 Cytochrome P450 CYP2 subfamily	sp|Q9VG17|CP304_DROME	Probable cytochrome P450 304a1 OS=Drosophila melanogaster GN=Cyp304a1 PE=2 SV=2	GO:0016491	CYP1A	CYP1
Zoff573551	D	859	0	0	0	0	0	8	0	0	0	0	0	0	0	0	0	0	0	0.4	0	0	0	0	0	0	0	0.133333	0	0	gi|567988826|gb|ETL39097.1|	hypothetical protein L916_09494 [Phytophthora parasitica]	pif:PITG_14013	cytochrome P450, putative	At2g44890	[QI] KOG0157 Cytochrome P450 CYP4/CYP19/CYP26 subfamilies	sp|O23066|C86A2_ARATH	Cytochrome P450 86A2 OS=Arabidopsis thaliana GN=CYP86A2 PE=1 SV=1	GO:0046872 ;GO:0016491	CYP86A	CYP86
Zoff574282	A	887	7	0	0	0	0	0	0	0	0	0	1	0	0.34	0	0	0	0	0	0	0	0	0	0.05	0	0.113333	0	0	0.0166667	gi|675389734|gb|KFM82631.1|	Cytochrome P450 3A13, partial [Stegodyphus mimosarum]	der:Dere_GG10635	GG10635 gene product from transcript GG10635-RA	7304036	[Q] KOG0158 Cytochrome P450 CYP3/CYP5/CYP6/CYP9 subfamilies	sp|Q9V4U7|C6A14_DROME	Probable cytochrome P450 6a14 OS=Drosophila melanogaster GN=Cyp6a14 PE=3 SV=2	GO:0016491 ;GO:0005488	CYP3A	CYP3
Zoff574870	A	647	0	0	0	0	0	0	0	0	0	4	0	0	0	0	0	0	0	0	0	0	0	0.2	0	0	0	0	0	0.0666667	gi|302888701|ref|XP_003043237.1|	hypothetical protein NECHADRAFT_51427 [Nectria haematococca mpVI 77-13-4]	ang:ANI_1_1772104	An12g04510; cytochrome P450	--	--	sp|A1DA60|FTMC_NEOFI	Tryprostatin B 6-hydroxylase OS=Neosartorya fischeri (strain ATCC 1020 / DSM 3700 / FGSC A1164 / NRRL 181) GN=ftmP450-1 PE=3 SV=1	GO:0020037 ;GO:0016705 ;GO:0005506 ;GO:0004497 ;GO:0055114	CYP	CYP
[truncated: 45 more rows]
