# Supplementary material for: Identification and expression profile of the soil moisture and Ralstonia solanacearum response CYPome in ginger (Zingiber officinale)
Source: PeerJ. 2021 Aug 2;9:e11755. doi: 10.7717/peerj.11755 (PMC8340902; doi:10.7717/peerj.11755)
Supplement: Supplemental Information 2 [file peerj-09-11755-s002.xlsx]

## Sheet: KEGG
Table S2 Kyoto Encyclopedia Genes and Genomes (KEGG) Enrichment Analyses of Different P450 Unigene Groups
	KEGG_A_class	KEGG_B_class	Pathway	P450	All	Pvalue	Qvalue	Pathway ID	Genes	K_IDs
Group A	Metabolism	Lipid metabolism	Steroid biosynthesis	23	277	1.74912e-29	4.37279e-28	ko00100	Zoff029237;Zoff037194;Zoff037195;Zoff093653;Zoff093654;Zoff098342;Zoff109431;Zoff109432;Zoff134149;Zoff134150;Zoff186519;Zoff198612;Zoff329324;Zoff337313;Zoff355323;Zoff371122;Zoff413781;Zoff466157;Zoff466846;Zoff499536;Zoff577924;Zoff601479;Zoff613623	K09832+K09832+K09832+K09832+K09832+K09832+K05917+K05917+K09832+K09832+K05917+K09831+K09831+K09832+K09831+K05917+K05917+K07436+K05917+K09831+K05917+K09832+K09831
	Metabolism	Metabolism of terpenoids and polyketides	Brassinosteroid biosynthesis	11	18	1.98304e-25	2.4788e-24	ko00905	Zoff156322;Zoff187095;Zoff231158;Zoff290494;Zoff292337;Zoff292338;Zoff299121;Zoff302378;Zoff310987;Zoff310988;Zoff501952	K09587+K09587+K12640+K15639+K09589+K09589+K15639+K09587+K12639+K12639+K15639
	Metabolism	Metabolism of cofactors and vitamins	Retinol metabolism	11	30	3.32842e-22	2.77369e-21	ko00830	Zoff038896;Zoff117172;Zoff143620;Zoff193687;Zoff193688;Zoff193689;Zoff338006;Zoff350225;Zoff397805;Zoff485603;Zoff506903	K07424+K07424+K17691+K07424+K07424+K07424+K07424+K07424+K17691+K07424+K07424
	Metabolism	Lipid metabolism	Linoleic acid metabolism	10	76	2.57355e-15	1.60847e-14	ko00591	Zoff038896;Zoff117172;Zoff193687;Zoff193688;Zoff193689;Zoff338006;Zoff350225;Zoff485603;Zoff506903;Zoff507053	K07424+K07424+K07424+K07424+K07424+K07424+K07424+K07424+K07424+K07418
	Metabolism	Lipid metabolism	Steroid hormone biosynthesis	6	13	2.45357e-13	1.22678e-12	ko00140	Zoff143620;Zoff193687;Zoff193688;Zoff193689;Zoff350225;Zoff397805	K17691+K07424+K07424+K07424+K07424+K17691
	Metabolism	Metabolism of terpenoids and polyketides	Carotenoid biosynthesis	7	57	7.62379e-11	3.17658e-10	ko00906	Zoff043137;Zoff114865;Zoff161215;Zoff251591;Zoff251597;Zoff280009;Zoff465823	K15747+K09837+K09843+K09843+K09843+K15747+K09843
	Human Diseases	Cancers	Chemical carcinogenesis	5	14	1.28631e-10	4.59397e-10	ko05204	Zoff143620;Zoff193687;Zoff193688;Zoff193689;Zoff397805	K17691+K07424+K07424+K07424+K17691
	Metabolism	Metabolism of terpenoids and polyketides	Diterpenoid biosynthesis	4	27	4.89475e-07	1.52961e-06	ko00904	Zoff088292;Zoff211809;Zoff225669;Zoff243745	K04123+K04122+K04123+K04123
	Metabolism	Global and Overview	Degradation of aromatic compounds	6	143	1.19661e-06	3.32391e-06	ko01220	Zoff063647;Zoff125599;Zoff126938;Zoff348258;Zoff348259;Zoff505708	K07824+K07824+K07824+K07824+K07824+K07824
	Metabolism	Biosynthesis of other secondary metabolites	Stilbenoid, diarylheptanoid and gingerol biosynthesis	2	14	0.000494218	0.00113765	ko00945	Zoff022787;Zoff224886	K09754+K00517
	Metabolism	Lipid metabolism	Arachidonic acid metabolism	4	154	0.000500567	0.00113765	ko00590	Zoff191832;Zoff358834;Zoff505508;Zoff507053	K01832+K01832+K01832+K07418
	Metabolism	Amino acid metabolism	Tryptophan metabolism	6	483	0.00101497	0.00211453	ko00380	Zoff034328;Zoff034330;Zoff374374;Zoff430479;Zoff460379;Zoff527464	K14338+K14338+K14338+K14338+K14338+K14338
	Metabolism	Lipid metabolism	Cutin, suberine and wax biosynthesis	2	27	0.00186862	0.00359349	ko00073	Zoff053323;Zoff489407	K15402+K15398
	Organismal Systems	Endocrine system	Ovarian Steroidogenesis	1	1	0.00236704	0.00422686	ko04913	Zoff507053	K07418
	Metabolism	Lipid metabolism	Fatty acid degradation	6	609	0.00324778	0.00541296	ko00071	Zoff034328;Zoff034330;Zoff374374;Zoff430479;Zoff460379;Zoff527464	K14338+K14338+K14338+K14338+K14338+K14338
	Metabolism	Biosynthesis of other secondary metabolites	Glucosinolate biosynthesis	1	2	0.00472855	0.00738836	ko00966	Zoff230849	K12153
	Organismal Systems	Nervous system	Serotonergic synapse	1	9	0.0211053	0.0277701	ko04726	Zoff507053	K07418
	Organismal Systems	Sensory system	Inflammatory mediator regulation of TRP channels	1	9	0.0211053	0.0277701	ko04750	Zoff507053	K07418
	Metabolism	Lipid metabolism	Primary bile acid biosynthesis	1	9	0.0211053	0.0277701	ko00120	Zoff527348	K07440
Group B	Metabolism	Biosynthesis of other secondary metabolites	Flavonoid biosynthesis	8	46	8.512e-19	9.3632e-18	ko00941	Zoff107087;Zoff174272;Zoff262690;Zoff262691;Zoff312200;Zoff312201;Zoff312209;Zoff449917	K05280+K13083+K00487+K00487+K13083+K13083+K13083+K05280
	Metabolism	Biosynthesis of other secondary metabolites	Flavone and flavonol biosynthesis	6	18	3.73406e-16	2.05373e-15	ko00944	Zoff107087;Zoff174272;Zoff312200;Zoff312201;Zoff312209;Zoff449917	K05280+K13083+K13083+K13083+K13083+K05280
	Metabolism	Lipid metabolism	Cutin, suberine and wax biosynthesis	6	27	5.93484e-15	2.17611e-14	ko00073	Zoff191425;Zoff243390;Zoff243391;Zoff269525;Zoff269536;Zoff269539	K15402+K15401+K15402+K15398+K15398+K15398
	Metabolism	Biosynthesis of other secondary metabolites	Stilbenoid, diarylheptanoid and gingerol biosynthesis	3	14	6.66971e-08	1.83417e-07	ko00945	Zoff236083;Zoff262690;Zoff262691	K00517+K00487+K00487
	Metabolism	Amino acid metabolism	Phenylalanine metabolism	4	283	2.20315e-05	4.84694e-05	ko00360	Zoff262690;Zoff262691;Zoff601667;Zoff601668	K00487+K00487+K10437+K10437
	Metabolism	Biosynthesis of other secondary metabolites	Phenylpropanoid biosynthesis	3	195	0.000208073	0.000381467	ko00940	Zoff147258;Zoff262690;Zoff262691	K09755+K00487+K00487
	Metabolism	Metabolism of cofactors and vitamins	Ubiquinone and other terpenoid-quinone biosynthesis	2	136	0.00298469	0.00452756	ko00130	Zoff262690;Zoff262691	K00487+K00487
	Metabolism	Global and Overview	Degradation of aromatic compounds	2	143	0.00329277	0.00452756	ko01220	Zoff262690;Zoff262691	K00487+K00487
	Metabolism	Lipid metabolism	Primary bile acid biosynthesis	1	9	0.00538099	0.00657677	ko00120	Zoff056629	K07440
	Metabolism	Metabolism of terpenoids and polyketides	Limonene and pinene degradation	1	30	0.0178299	0.0196129	ko00903	Zoff236083	K00517
Group C	Metabolism	Lipid metabolism	Steroid biosynthesis	14	277	1.70513e-20	2.89871e-19	ko00100	Zoff006486;Zoff088960;Zoff186456;Zoff186517;Zoff186518;Zoff198611;Zoff219541;Zoff261175;Zoff276996;Zoff282434;Zoff381228;Zoff413065;Zoff430281;Zoff490696	K05917+K05917+K05917+K05917+K05917+K09831+K09831+K05917+K09832+K05917+K05917+K05917+K09831+K05917
	Metabolism	Biosynthesis of other secondary metabolites	Stilbenoid, diarylheptanoid and gingerol biosynthesis	5	14	2.17257e-12	1.84669e-11	ko00945	Zoff020741;Zoff020742;Zoff262685;Zoff262686;Zoff605147	K00487+K00487+K00487+K00487+K00517
	Metabolism	Biosynthesis of other secondary metabolites	Flavonoid biosynthesis	4	46	1.8007e-07	1.02039e-06	ko00941	Zoff020741;Zoff020742;Zoff262685;Zoff262686	K00487+K00487+K00487+K00487
	Metabolism	Energy metabolism	Nitrogen metabolism	6	302	8.09664e-07	3.162e-06	ko00910	Zoff135171;Zoff135172;Zoff371327;Zoff453593;Zoff491274;Zoff559861	K15877+K15877+K15877+K15877+K15877+K15877
	Metabolism	Metabolism of terpenoids and polyketides	Brassinosteroid biosynthesis	3	18	9.29999e-07	3.162e-06	ko00905	Zoff228248;Zoff609601;Zoff609602	K09588+K09587+K09587
	Metabolism	Biosynthesis of other secondary metabolites	Phenylpropanoid biosynthesis	5	195	2.10455e-06	5.96291e-06	ko00940	Zoff020741;Zoff020742;Zoff262685;Zoff262686;Zoff400686	K00487+K00487+K00487+K00487+K09755
	Metabolism	Amino acid metabolism	Phenylalanine metabolism	5	283	1.28623e-05	2.98374e-05	ko00360	Zoff020741;Zoff020742;Zoff169960;Zoff262685;Zoff262686	K00487+K00487+K10437+K00487+K00487
	Metabolism	Metabolism of cofactors and vitamins	Ubiquinone and other terpenoid-quinone biosynthesis	4	136	1.40411e-05	2.98374e-05	ko00130	Zoff020741;Zoff020742;Zoff262685;Zoff262686	K00487+K00487+K00487+K00487
	Metabolism	Global and Overview	Degradation of aromatic compounds	4	143	1.71085e-05	3.23161e-05	ko01220	Zoff020741;Zoff020742;Zoff262685;Zoff262686	K00487+K00487+K00487+K00487
	Metabolism	Amino acid metabolism	Tryptophan metabolism	4	483	0.00176847	0.0030064	ko00380	Zoff034329;Zoff111912;Zoff537706;Zoff556497	K14338+K14338+K14338+K14338
	Metabolism	Biosynthesis of other secondary metabolites	Glucosinolate biosynthesis	1	2	0.00215617	0.00333227	ko00966	Zoff017841	K12153
	Metabolism	Lipid metabolism	Fatty acid degradation	4	609	0.00407022	0.00576614	ko00071	Zoff034329;Zoff111912;Zoff537706;Zoff556497	K14338+K14338+K14338+K14338
	Metabolism	Xenobiotics biodegradation and metabolism	Aminobenzoate degradation	1	17	0.018184	0.0237791	ko00627	Zoff111912	K14338
	Metabolism	Metabolism of terpenoids and polyketides	Limonene and pinene degradation	1	30	0.0318721	0.0387019	ko00903	Zoff605147	K00517
Group D	Metabolism	Global and Overview	Degradation of aromatic compounds	8	143	2.69356e-13	4.30969e-12	ko01220	Zoff063643;Zoff063644;Zoff148158;Zoff214873;Zoff332762;Zoff413283;Zoff426395;Zoff591029	K07824+K07824+K00487+K07824+K07824+K07824+K07824+K07824
	Metabolism	Biosynthesis of other secondary metabolites	Flavonoid biosynthesis	6	46	1.79809e-12	1.43847e-11	ko00941	Zoff135396;Zoff148158;Zoff151318;Zoff152048;Zoff312194;Zoff312214	K13083+K00487+K09754+K05280+K13083+K13083
	Metabolism	Biosynthesis of other secondary metabolites	Flavone and flavonol biosynthesis	4	18	1.2024e-09	6.41282e-09	ko00944	Zoff135396;Zoff152048;Zoff312194;Zoff312214	K13083+K05280+K13083+K13083
	Metabolism	Metabolism of cofactors and vitamins	Retinol metabolism	4	30	1.06945e-08	4.27779e-08	ko00830	Zoff055796;Zoff117173;Zoff117174;Zoff405497	K07424+K07424+K07424+K07424
	Metabolism	Biosynthesis of other secondary metabolites	Stilbenoid, diarylheptanoid and gingerol biosynthesis	3	14	1.91288e-07	6.12121e-07	ko00945	Zoff148158;Zoff151318;Zoff198837	K00487+K09754+K00517
	Metabolism	Lipid metabolism	Linoleic acid metabolism	4	76	4.87584e-07	1.30022e-06	ko00591	Zoff055796;Zoff117173;Zoff117174;Zoff405497	K07424+K07424+K07424+K07424
	Metabolism	Lipid metabolism	Cutin, suberine and wax biosynthesis	3	27	1.52595e-06	3.48788e-06	ko00073	Zoff080912;Zoff474178;Zoff535192	K15402+K15402+K15402
	Metabolism	Biosynthesis of other secondary metabolites	Phenylpropanoid biosynthesis	3	195	0.000577714	0.00115543	ko00940	Zoff038827;Zoff148158;Zoff151318	K09755+K00487+K09754
	Metabolism	Lipid metabolism	Steroid biosynthesis	3	277	0.00158889	0.00282469	ko00100	Zoff372458;Zoff381391;Zoff536657	K05917+K09831+K09831
	Metabolism	Lipid metabolism	alpha-Linolenic acid metabolism	2	173	0.00924266	0.0147882	ko00592	Zoff300345;Zoff300346	K01723+K01723
	Metabolism	Lipid metabolism	Steroid hormone biosynthesis	1	13	0.0108536	0.0155783	ko00140	Zoff055796	K07424
	Human Diseases	Cancers	Chemical carcinogenesis	1	14	0.0116837	0.0155783	ko05204	Zoff055796	K07424
	Metabolism	Metabolism of terpenoids and polyketides	Brassinosteroid biosynthesis	1	18	0.0149977	0.0184587	ko00905	Zoff292339	K09589
	Metabolism	Metabolism of terpenoids and polyketides	Limonene and pinene degradation	1	30	0.0248754	0.0284291	ko00903	Zoff198837	K00517
