# Supplementary material for: Identification and expression profile of the soil moisture and Ralstonia solanacearum response CYPome in ginger (Zingiber officinale)
Source: PeerJ. 2021 Aug 2;9:e11755. doi: 10.7717/peerj.11755 (PMC8340902; doi:10.7717/peerj.11755)
Supplement: Supplemental Information 3 — P450 DEGs were marked in bold. [file peerj-09-11755-s003.xlsx]

## Sheet: 84461619060117
Table S3 Differentially Expressed Unigenes Identified Between Each Two Samples
SeqID	LUN-1A	LUN-2A	LUN-3A	LI-1A	LI-2A	LI-3A	HUN-1A	HUN-2A	HUN-3A	HI-1A	HI-2A	HI-3A	LUN-1A_CPM	LUN-2A_CPM	LUN-3A_CPM	LI-1A_CPM	LI-2A_CPM	LI-3A_CPM	HUN-1A_CPM	HUN-2A_CPM	HUN-3A_CPM	HI-1A_CPM	HI-2A_CPM	HI-3A_CPM	LUN_mean	LI_mean	HUN_mean	HI_mean	LIvsLUN_log2(FC)	LIvsLUN_FDR	HIvsHUN_log2(FC)	HIvsHUN_FDR	HIvsLI_log2(FC)	HIvsLI_FDR	HUNvsLUN_log2(FC)	HUNvsLUN_FDR	NR-ID	NR-description	KEGG-ID	KEGG-description	KOG-ID	KOG-description	SwissProt-ID	SwissProt-description	GO-annotation
Zoff018325	0	2	0	1	2	0	0	0	0	9	20	14	0	0.1	0	0.05	0.11	0	0	0	0	0.46	1.03	0.69	0.0333333	0.0533333	0.001	0.726667	0.678072	1	9.50515	0.030416	3.76818	0.0235552	-5.05889	1	gi|682341475|gb|KFY36094.1|	hypothetical protein V494_05319 [Pseudogymnoascus pannorum VKM F-4513 (FW-928)]	aor:AOR_1_1174054	AO090011000685; toxin biosynthesis cytochrome P450 monooxygenase	Hs4503233	[Q] KOG0158 Cytochrome P450 CYP3/CYP5/CYP6/CYP9 subfamilies	sp|O13317|TRI11_FUSSP	Isotrichodermin C-15 hydroxylase OS=Fusarium sporotrichioides GN=TRI11 PE=3 SV=1	GO:0016491,cytochrome p450 monooxygenase; GO:0005488,cytochrome p450 monooxygenase
Zoff020741	3	5	4	6	2	3	26	1	8.44	70.49	6.6	77.69	0.15	0.25	0.2	0.3	0.11	0.15	1.31	0.05	0.43	3.58	0.34	3.84	0.2	0.186667	0.596667	2.58667	-0.0995357	1	2.1161	0.883518	3.79256	0.0076622	1.57693	1	gi|695080662|ref|XP_009387808.1|	PREDICTED: trans-cinnamate 4-monooxygenase-like [Musa acuminata subsp. malaccensis]	sbi:SORBI_04g017460	hypothetical protein; K00487 trans-cinnamate 4-monooxygenase [EC:1.14.13.11]	At2g30490	[Q] KOG0156 Cytochrome P450 CYP2 subfamily	sp|H2DH22|C7A10_PANGI	Cytochrome P450 CYP73A100 OS=Panax ginseng PE=2 SV=1	GO:0016023,cytochrome p450 cyp73a100-like; GO:0004497,cytochrome p450 cyp73a100-like; GO:0005506,cytochrome p450 cyp73a100-like; GO:0020037,cytochrome p450 cyp73a100-like; GO:0016705,cytochrome p450 cyp73a100-like; GO:0055114,cytochrome p450 cyp73a100-like
Zoff020742	5	5	2	4	0	0	54	4	10.56	72.51	4.4	106.31	0.25	0.25	0.1	0.2	0	0	2.73	0.2	0.53	3.68	0.23	5.26	0.2	0.0666667	1.15333	3.05667	-1.58496	1	1.40615	1	5.51885	0.00309118	2.52774	0.69811	gi|695080662|ref|XP_009387808.1|	PREDICTED: trans-cinnamate 4-monooxygenase-like [Musa acuminata subsp. malaccensis]	sbi:SORBI_04g017460	hypothetical protein; K00487 trans-cinnamate 4-monooxygenase [EC:1.14.13.11]	At2g30490	[Q] KOG0156 Cytochrome P450 CYP2 subfamily	sp|H2DH22|C7A10_PANGI	Cytochrome P450 CYP73A100 OS=Panax ginseng PE=2 SV=1	GO:0016023,cytochrome p450 cyp73a100-like; GO:0004497,cytochrome p450 cyp73a100-like; GO:0005506,cytochrome p450 cyp73a100-like; GO:0020037,cytochrome p450 cyp73a100-like; GO:0016705,cytochrome p450 cyp73a100-like; GO:0055114,cytochrome p450 cyp73a100-like
Zoff053948	0	0	0	5	2.67	81.37	0	0	2.54	0	0	0	0	0	0	0.25	0.15	4.04	0	0	0.13	0	0	0	0.001	1.48	0.0433333	0.001	10.5314	0.00150238	-5.43741	1	-10.5314	0.00310278	5.43741	1	gi|700476121|gb|KGO63930.1|	Cytochrome P450 [Penicillium italicum]	afm:AFUA_4G02730	O-methylsterigmatocystin oxidoreductase	At1g74550	[Q] KOG0156 Cytochrome P450 CYP2 subfamily	sp|B8NHY4|ORDA_ASPFN	O-methylsterigmatocystin oxidoreductase OS=Aspergillus flavus (strain ATCC 200026 / FGSC A1120 / NRRL 3357 / JCM 12722 / SRRC 167) GN=ordA PE=2 SV=1	GO:0046872,cytochrome p450; GO:0016491,cytochrome p450
Zoff055024	0	1	0	3	2	40	5	0	0	0	1	0	0	0.05	0	0.15	0.11	1.98	0.25	0	0	0	0.05	0	0.0166667	0.746667	0.0833333	0.0166667	5.48543	0.0368739	-2.32193	1	-5.48543	0.0525728	2.32193	1	gi|628321496|ref|XP_007742572.1|	hypothetical protein A1O5_03771 [Cladophialophora psammophila CBS 110553]	mgr:MGG_09920	MG09920.4; hypothetical protein	At4g39490	[QI] KOG0157 Cytochrome P450 CYP4/CYP19/CYP26 subfamilies	sp|Q9Y758|CP52M_DEBHN	Cytochrome P450 52A13 OS=Debaryomyces hansenii GN=CYP52A13 PE=2 SV=1	GO:0020037,cytochrome p450; GO:0016712,cytochrome p450; GO:0005506,cytochrome p450; GO:0055114,cytochrome p450
Zoff057305	14	41	33	24	15	12	1	0	3	2	3	3	0.69	2.05	1.63	1.18	0.86	0.6	0.05	0	0.15	0.1	0.16	0.15	1.45667	0.88	0.0666667	0.136667	-0.727095	1	1.03562	1	-2.68684	0.0605518	-4.44956	0.0292687	gi|628263944|ref|XP_007730344.1|	hypothetical protein A1O3_02011 [Capronia epimyces CBS 606.96]	nfi:NFIA_047320	Cytochrome P450 oxidoreductase, putative	Hs13787189	[Q] KOG0156 Cytochrome P450 CYP2 subfamily	sp|Q4WAW8|FTME_ASPFU	Fumitremorgin C synthase OS=Neosartorya fumigata (strain ATCC MYA-4609 / Af293 / CBS 101355 / FGSC A1100) GN=ftmP450-2 PE=3 SV=1	GO:0020037,cytochrome p450; GO:0016705,cytochrome p450; GO:0005506,cytochrome p450; GO:0055114,cytochrome p450
Zoff061840	0	0	0	0	0	0	5.99	0	0	19.19	0	16.49	0	0	0	0	0	0	0.3	0	0	0.97	0	0.82	0.001	0.001	0.1	0.596667	0	1	2.57693	1	9.22078	0.0400141	6.64386	1	gi|645241637|ref|XP_008227171.1|	PREDICTED: cytochrome P450 71D9-like [Prunus mume]	rcu:RCOM_0794410	cytochrome P450, putative (EC:1.14.13.68)	At5g25140	[Q] KOG0156 Cytochrome P450 CYP2 subfamily	sp|P49264|C71B1_THLAR	Cytochrome P450 71B1 OS=Thlaspi arvense GN=CYP71B1 PE=2 SV=1	GO:0020037,cytochrome p450 71d9-like; GO:0016705,cytochrome p450 71d9-like; GO:0004497,cytochrome p450 71d9-like; GO:0005506,cytochrome p450 71d9-like; GO:0055114,cytochrome p450 71d9-like
Zoff069181	0	2	3	13	3	382	0	2	59	1	0	2	0	0.1	0.15	0.64	0.17	18.95	0	0.1	2.97	0.05	0	0.1	0.0833333	6.58667	1.02333	0.05	6.30451	0.00402152	-4.3552	0.466832	-7.04148	0.00294062	3.61824	0.91988	gi|628332363|ref|XP_007744751.1|	hypothetical protein A1O5_05965 [Cladophialophora psammophila CBS 110553]	cpw:CPC735_011130	Cytochrome P450 family protein	Hs4503233	[Q] KOG0158 Cytochrome P450 CYP3/CYP5/CYP6/CYP9 subfamilies	sp|Q12612|TRI4_FUSSP	Trichodiene oxygenase OS=Fusarium sporotrichioides GN=TRI4 PE=3 SV=1	GO:0003676,cytochrome p450; GO:0004497,cytochrome p450; GO:0005506,cytochrome p450; GO:0020037,cytochrome p450; GO:0016705,cytochrome p450; GO:0030529,cytochrome p450; GO:0055114,cytochrome p450
Zoff082186	32	180	70	368	244	545	145	98	252	4	1	6	1.57	9.02	3.46	18.11	14.02	27.04	7.33	4.85	12.69	0.2	0.05	0.3	4.68333	19.7233	8.29	0.183333	2.0743	0.0311417	-5.49883	0.000348372	-6.74929	5.88e-12	0.823836	1	gi|695032368|ref|XP_009403729.1|	PREDICTED: cytochrome P450 94C1-like [Musa acuminata subsp. malaccensis]	rcu:RCOM_0331070	cytochrome P450, putative (EC:1.14.14.1)	At2g27690	[QI] KOG0157 Cytochrome P450 CYP4/CYP19/CYP26 subfamilies	sp|P85191|CP450_HELAN	Cytochrome P450 (Fragment) OS=Helianthus annuus PE=1 SV=1	GO:0020037,cytochrome p450 94c1-like; GO:0005506,cytochrome p450 94c1-like; GO:0070330,cytochrome p450 94c1-like; GO:0055114,cytochrome p450 94c1-like
Zoff086269	0	0	0	1	0	0	1	0	0	3	0	100	0	0	0	0.05	0	0	0.05	0	0	0.15	0	4.94	0.001	0.0166667	0.0166667	1.69667	4.05889	1	6.66959	0.143618	6.66959	0.036907	4.05889	1	gi|695415557|ref|XP_009526595.1|	hypothetical protein PHYSODRAFT_499752 [Phytophthora sojae]	pif:PITG_14013	cytochrome P450, putative	At4g00360	[QI] KOG0157 Cytochrome P450 CYP4/CYP19/CYP26 subfamilies	sp|O23066|C86A2_ARATH	Cytochrome P450 86A2 OS=Arabidopsis thaliana GN=CYP86A2 PE=1 SV=1	GO:0046872,hypothetical protein L917_09431 [Phytophthora parasitica]; GO:0016491,hypothetical protein L917_09431 [Phytophthora parasitica]
Zoff090789	2	0	0	2	1	45	0	1	7	0	0	0	0.1	0	0	0.1	0.06	2.23	0	0.05	0.35	0	0	0	0.0333333	0.796667	0.133333	0.001	4.57894	0.123532	-7.05889	1	-9.63783	0.0298758	2	1	gi|628324540|ref|XP_007743124.1|	hypothetical protein A1O5_04327 [Cladophialophora psammophila CBS 110553]	pno:SNOG_15745	hypothetical protein	Hs4503203	[Q] KOG0156 Cytochrome P450 CYP2 subfamily	sp|Q4WAW8|FTME_ASPFU	Fumitremorgin C synthase OS=Neosartorya fumigata (strain ATCC MYA-4609 / Af293 / CBS 101355 / FGSC A1100) GN=ftmP450-2 PE=3 SV=1	GO:0020037,cytochrome p450; GO:0016705,cytochrome p450; GO:0004497,cytochrome p450; GO:0005506,cytochrome p450; GO:0055114,cytochrome p450
Zoff093893	6	0	0.94	2.16	0	8.27	11.37	1.43	8.86	92.32	10.7	61.36	0.3	0	0.05	0.11	0	0.41	0.57	0.07	0.45	4.68	0.55	3.03	0.116667	0.173333	0.363333	2.75333	0.571157	1	2.92181	0.224909	3.98956	0.0100789	1.6389	1	gi|403399730|sp|E3W9C4.1|C71A1_ZINZE	RecName: Full=Alpha-humulene 10-hydroxylase [Zingiber zerumbet]	vvi:100254557	hypothetical protein LOC100254557	At4g13310	[Q] KOG0156 Cytochrome P450 CYP2 subfamily	sp|E3W9C4|C71A1_ZINZE	Alpha-humulene 10-hydroxylase OS=Zingiber zerumbet GN=CYP71BA1 PE=1 SV=1	GO:0016491,premnaspirodiene oxygenase-like; GO:0005488,premnaspirodiene oxygenase-like
Zoff093895	0	0	0	0	0	0	3.11	0	1.19	10.68	3.22	14.62	0	0	0	0	0	0	0.16	0	0.06	0.54	0.17	0.72	0.001	0.001	0.0733333	0.476667	0	1	2.70044	0.712892	8.89684	0.0157099	6.1964	1	gi|403399730|sp|E3W9C4.1|C71A1_ZINZE	RecName: Full=Alpha-humulene 10-hydroxylase [Zingiber zerumbet]	vvi:100254557	hypothetical protein LOC100254557	At4g13310	[Q] KOG0156 Cytochrome P450 CYP2 subfamily	sp|E3W9C4|C71A1_ZINZE	Alpha-humulene 10-hydroxylase OS=Zingiber zerumbet GN=CYP71BA1 PE=1 SV=1	GO:0016491,premnaspirodiene oxygenase-like; GO:0005488,premnaspirodiene oxygenase-like
Zoff103217	16.64	74.33	17.59	22	27	21	20	28	3	2	3	2	0.82	3.72	0.87	1.08	1.55	1.04	1.01	1.39	0.15	0.1	0.16	0.1	1.80333	1.22333	0.85	0.12	-0.559849	1	-2.82443	0.374371	-3.34971	0.00484222	-1.08513	1	gi|695072967|ref|XP_009383632.1|	PREDICTED: cytochrome P450 71A1-like [Musa acuminata subsp. malaccensis]	osa:4344445	Os08g0105400	At3g26830	[Q] KOG0156 Cytochrome P450 CYP2 subfamily	sp|P24465|C71A1_PERAE	Cytochrome P450 71A1 OS=Persea americana GN=CYP71A1 PE=1 SV=2	GO:0046872,cytochrome p450 71a1-like; GO:0016491,cytochrome p450 71a1-like; GO:0016301,cytochrome p450 71a1-like; GO:1901363,cytochrome p450 71a1-like; GO:0008152,cytochrome p450 71a1-like; GO:0097159,cytochrome p450 71a1-like
Zoff103218	20	74	12.41	5	9	24	17	29	7	0	1	1	0.98	3.71	0.61	0.25	0.52	1.19	0.86	1.44	0.35	0	0.05	0.05	1.76667	0.653333	0.883333	0.0333333	-1.43514	0.683534	-4.72792	0.0651878	-4.29278	0.0347768	-1	1	gi|695072967|ref|XP_009383632.1|	PREDICTED: cytochrome P450 71A1-like [Musa acuminata subsp. malaccensis]	osa:4344445	Os08g0105400	At3g26830	[Q] KOG0156 Cytochrome P450 CYP2 subfamily	sp|P24465|C71A1_PERAE	Cytochrome P450 71A1 OS=Persea americana GN=CYP71A1 PE=1 SV=2	GO:0046872,cytochrome p450 71a1-like; GO:0016491,cytochrome p450 71a1-like; GO:0016023,cytochrome p450 71a1-like
Zoff114619	6.99	3	3	3.88	0	6.63	5	8	6.37	46.97	6.75	40.86	0.34	0.15	0.15	0.19	0	0.33	0.25	0.4	0.32	2.38	0.35	2.02	0.213333	0.173333	0.323333	1.58333	-0.29956	1	2.29187	0.404978	3.19134	0.044172	0.599913	1	gi|695010775|ref|XP_009392073.1|	PREDICTED: cytochrome P450 71A1-like [Musa acuminata subsp. malaccensis]	vvi:100260959	hypothetical protein LOC100260959	At4g31500	[Q] KOG0156 Cytochrome P450 CYP2 subfamily	sp|O65782|C83B1_ARATH	Cytochrome P450 83B1 OS=Arabidopsis thaliana GN=CYP83B1 PE=1 SV=1	GO:0016491,cytochrome p450 71a1-like; GO:0005488,cytochrome p450 71a1-like
Zoff117232	0	0	0	26	5	3	0	0	0	7	1	2	0	0	0	1.28	0.29	0.15	0	0	0	0.36	0.05	0.1	0.001	0.573333	0.001	0.17	9.16323	0.009685	7.40939	0.785396	-1.75384	0.844971	0	1	gi|660964853|gb|KEP49762.1|	cytochrome P450 family protein [Rhizoctonia solani 123E]	cci:CC1G_11452	cytochrome P450	At4g13770	[Q] KOG0156 Cytochrome P450 CYP2 subfamily	sp|B8NHY4|ORDA_ASPFN	O-methylsterigmatocystin oxidoreductase OS=Aspergillus flavus (strain ATCC 200026 / FGSC A1120 / NRRL 3357 / JCM 12722 / SRRC 167) GN=ordA PE=2 SV=1	GO:0046872,cytochrome p450 family protein; GO:0016491,cytochrome p450 family protein
Zoff118483	15	20	1	40	10	732	4	1	91	1	8	3	0.74	1	0.05	1.97	0.57	36.32	0.2	0.05	4.58	0.05	0.41	0.15	0.596667	12.9533	1.61	0.203333	4.44025	0.0275515	-2.98514	0.671931	-5.99333	0.00253963	1.43206	1	gi|656909385|gb|KEF55081.1|	3-hydroxyphenylacetate 6-hydroxylase [Exophiala aquamarina CBS 119918]	ure:UREG_05702	hypothetical protein; K10438 3-hydroxyphenylacetate 6-hydroxylase [EC:1.14.13.63]	Hs4503199	[Q] KOG0156 Cytochrome P450 CYP2 subfamily	sp|Q078T0|PHACB_EMEND	3-hydroxyphenylacetate 6-hydroxylase OS=Emericella nidulans GN=phacB PE=1 SV=1	GO:0020037,3-hydroxyphenylacetate 6 hydroxylase; GO:0016705,3-hydroxyphenylacetate 6 hydroxylase; GO:0004497,3-hydroxyphenylacetate 6 hydroxylase; GO:0005506,3-hydroxyphenylacetate 6 hydroxylase; GO:0055114,3-hydroxyphenylacetate 6 hydroxylase
Zoff123043	5	1	3	3	2	8	5	8	4	80	5	102	0.25	0.05	0.15	0.15	0.11	0.4	0.25	0.4	0.2	4.06	0.26	5.04	0.15	0.22	0.283333	3.12	0.552541	1	3.46097	0.116472	3.82597	0.0128394	0.917538	1	gi|695033844|ref|XP_009404407.1|	PREDICTED: cytochrome P450 CYP72A219-like [Musa acuminata subsp. malaccensis]	vvi:100254391	hypothetical protein LOC100254391	At3g14650	[QI] KOG0157 Cytochrome P450 CYP4/CYP19/CYP26 subfamilies	sp|H2DH21|C7A29_PANGI	Cytochrome P450 CYP72A219 OS=Panax ginseng PE=2 SV=1	GO:0016491,cytochrome p450 cyp72a219-like; GO:0005488,cytochrome p450 cyp72a219-like
Zoff125599	0	0	0	0	0	0	0	0	2	4	9	10	0	0	0	0	0	0	0	0	0.1	0.2	0.47	0.49	0.001	0.001	0.0333333	0.386667	0	1	3.53605	0.529264	8.59495	0.0230801	5.05889	1	gi|576988851|gb|EUC61575.1|	cytochrome P450 family monooxygenase pc-bph protein [Rhizoctonia solani AG-3 Rhs1AP]	lbc:LACBIDRAFT_291185	cytochrome P450 monooxygenase; K07824 benzoate 4-monooxygenase [EC:1.14.13.12]	CE01657	[Q] KOG0158 Cytochrome P450 CYP3/CYP5/CYP6/CYP9 subfamilies	sp|P17549|CP53_ASPNG	Benzoate 4-monooxygenase OS=Aspergillus niger GN=bphA PE=1 SV=1	GO:0020037,cytochrome p450 monooxygenase pc-bph; GO:0016705,cytochrome p450 monooxygenase pc-bph; GO:0004497,cytochrome p450 monooxygenase pc-bph; GO:0005506,cytochrome p450 monooxygenase pc-bph; GO:0055114,cytochrome p450 monooxygenase pc-bph
Zoff135396	77	195	129	221	182	181	43	50	75	22	47	57	3.79	9.77	6.37	10.88	10.45	8.98	2.17	2.48	3.78	1.12	2.43	2.82	6.64333	10.1033	2.81	2.12333	0.604852	1	-0.404239	1	-2.25043	0.010592	-1.24134	1	gi|695048565|ref|XP_009412197.1|	PREDICTED: flavonoid 3',5'-hydroxylase 1-like [Musa acuminata subsp. malaccensis]	sbi:SORBI_01g034460	hypothetical protein; K13083 cytochrome P450, family 75, subfamily A (flavonoid 3',5'-hydroxylase) [EC:1.14.13.88]	At5g07990	[Q] KOG0156 Cytochrome P450 CYP2 subfamily	sp|P48418|C75A1_PETHY	Flavonoid 3',5'-hydroxylase 1 OS=Petunia hybrida GN=CYP75A1 PE=2 SV=1	GO:0046872,flavonoid 3 -hydroxylase 1-like; GO:0016491,flavonoid 3 -hydroxylase 1-like
Zoff136411	0	0	3	36	3	26	1	0	12	0	0	0	0	0	0.15	1.77	0.17	1.29	0.05	0	0.6	0	0	0	0.05	1.07667	0.216667	0.001	4.4285	0.0081319	-7.75933	0.884614	-10.0724	0.00101331	2.11548	1	gi|656910014|gb|KEF55692.1|	hypothetical protein A1O9_08442 [Exophiala aquamarina CBS 119918]	mgr:MGG_05235	MG05235.4; hypothetical protein	At4g13770	[Q] KOG0156 Cytochrome P450 CYP2 subfamily	sp|Q12645|PID9_FUSSO	Pisatin demethylase OS=Fusarium solani subsp. pisi GN=PDAT9 PE=3 SV=1	GO:0020037,cytochrome p450 oxidoreductase; GO:0016705,cytochrome p450 oxidoreductase; GO:0004497,cytochrome p450 oxidoreductase; GO:0005506,cytochrome p450 oxidoreductase; GO:0055114,cytochrome p450 oxidoreductase
Zoff138030	0	0	0	18	1.72	4	0	0	0	0	0	0	0	0	0	0.89	0.1	0.2	0	0	0	0	0	0	0.001	0.396667	0.001	0.001	8.63178	0.0437774	0	1	-8.63178	0.0586194	0	1	gi|576982588|gb|EUC55331.1|	cytochrome P450 family:NADPH-P450 family reductase, partial [Rhizoctonia solani AG-3 Rhs1AP]	--	--	--	--	--	--	GO:0043167,zinc finger ring-type protein
Zoff144637	5	14	7	21	12	84	8	2	45	0	0	2	0.25	0.7	0.35	1.03	0.69	4.17	0.4	0.1	2.27	0	0	0.1	0.433333	1.96333	0.923333	0.0333333	2.17976	0.115321	-4.79181	0.186357	-5.8802	0.000465882	1.09137	1	gi|656907438|gb|KEF53176.1|	cytochrome P450 oxidoreductase [Exophiala aquamarina CBS 119918]	ssl:SS1G_00445	hypothetical protein	SPAC19G12.08	[I] KOG0539 Sphingolipid fatty acid hydroxylase	sp|Q03529|SCS7_YEAST	Ceramide very long chain fatty acid hydroxylase SCS7 OS=Saccharomyces cerevisiae (strain ATCC 204508 / S288c) GN=SCS7 PE=1 SV=1	GO:0006633,fatty acid hydroxylase; GO:0006665,fatty acid hydroxylase; GO:0016491,fatty acid hydroxylase; GO:0005506,fatty acid hydroxylase; GO:0020037,fatty acid hydroxylase; GO:0005783,fatty acid hydroxylase; GO:0055114,fatty acid hydroxylase
Zoff148742	1	1	1	4	1	174	7	2	17	0	0	0	0.05	0.05	0.05	0.2	0.06	8.63	0.35	0.1	0.86	0	0	0	0.05	2.96333	0.436667	0.001	5.88915	0.0124043	-8.77039	0.15686	-11.533	0.00363192	3.12653	0.769203	gi|684157332|ref|XP_009152544.1|	cytochrome P450 alkane hydroxylase [Exophiala dermatitidis NIH/UT8656]	pcs:Pc20g11290	Pc20g11290	At1g24540	[QI] KOG0157 Cytochrome P450 CYP4/CYP19/CYP26 subfamilies	sp|Q9Y757|CP52L_DEBHN	Cytochrome P450 52A12 OS=Debaryomyces hansenii GN=CYP52A12 PE=2 SV=2	GO:0020037,cytochrome p450 alkane hydroxylase; GO:0016712,cytochrome p450 alkane hydroxylase; GO:0005506,cytochrome p450 alkane hydroxylase; GO:0055114,cytochrome p450 alkane hydroxylase
Zoff155206	2	0	0	4	5	58	3	0	7	0	1	2	0.1	0	0	0.2	0.29	2.88	0.15	0	0.35	0	0.05	0.1	0.0333333	1.12333	0.166667	0.05	5.07468	0.0153762	-1.73697	1	-4.48971	0.03611	2.32193	1	gi|684170272|ref|XP_009159007.1|	hypothetical protein HMPREF1120_06555 [Exophiala dermatitidis NIH/UT8656]	bfu:BC1G_07134	hypothetical protein	At3g14680	[QI] KOG0157 Cytochrome P450 CYP4/CYP19/CYP26 subfamilies	sp|H1A988|C7254_GLYUR	11-oxo-beta-amyrin 30-oxidase OS=Glycyrrhiza uralensis GN=CYP72A154 PE=1 SV=1	GO:0020037,cytochrome p450; GO:0016705,cytochrome p450; GO:0004497,cytochrome p450; GO:0005506,cytochrome p450; GO:0055114,cytochrome p450
Zoff156147	0	0	0	12	1	111.74	2	0	23	0	1	1.07	0	0	0	0.59	0.06	5.54	0.1	0	1.16	0	0.05	0.05	0.001	2.06333	0.42	0.0333333	11.0108	0.000923704	-3.65535	0.890742	-5.95187	0.00966351	8.71425	0.559962	gi|628339020|ref|XP_007746855.1|	hypothetical protein A1O5_08080 [Cladophialophora psammophila CBS 110553]	fgr:FG11282.1	hypothetical protein	At5g45340	[QI] KOG0157 Cytochrome P450 CYP4/CYP19/CYP26 subfamilies	sp|Q701P2|KO1_GIBIN	Ent-kaurene oxidase OS=Gibberella intermedia GN=CYP503A1 PE=1 SV=1	GO:0016491,ent-kaurene oxidase; GO:0005488,ent-kaurene oxidase
Zoff157629	0	4.93	0	9.44	7	215.9	1	1	17.38	0	0	1	0	0.25	0	0.46	0.4	10.71	0.05	0.05	0.88	0	0	0.05	0.0833333	3.85667	0.326667	0.0166667	5.53232	0.00994876	-4.29278	0.78826	-7.85425	0.000898503	1.97085	1	gi|345565171|gb|EGX48124.1|	hypothetical protein AOL_s00081g120 [Arthrobotrys oligospora ATCC 24927]	act:ACLA_072970	Cytochrome P450 oxidoreductase, putative	Hs10834998	[Q] KOG0156 Cytochrome P450 CYP2 subfamily	sp|B8NHY4|ORDA_ASPFN	O-methylsterigmatocystin oxidoreductase OS=Aspergillus flavus (strain ATCC 200026 / FGSC A1120 / NRRL 3357 / JCM 12722 / SRRC 167) GN=ordA PE=2 SV=1	GO:0046872,cytochrome p450 oxidoreductase -; GO:0016491,cytochrome p450 oxidoreductase -
Zoff158307	706	987	1058	363	226	365	1501	220	505	1042	392	347	34.74	49.45	52.22	17.87	12.98	18.11	75.9	10.9	25.43	52.86	20.27	17.15	45.47	16.32	37.41	30.0933	-1.47827	0.0109585	-0.31398	1	0.882803	0.894424	-0.281491	1	gi|313760499|dbj|BAJ41268.1|	NADPH-P450 reductase 1 [Zingiber officinale]	osa:4347838	Os09g0558900; K00327 NADPH-ferrihemoprotein reductase [EC:1.6.2.4]	At4g30210	[C] KOG1158 NADP/FAD dependent oxidoreductase	sp|Q05001|NCPR_CATRO	NADPH--cytochrome P450 reductase OS=Catharanthus roseus GN=CPR PE=2 SV=1	GO:0005789,nadph--cytochrome p450 reductase-like; GO:0003958,nadph--cytochrome p450 reductase-like; GO:0005506,nadph--cytochrome p450 reductase-like; GO:0010181,nadph--cytochrome p450 reductase-like; GO:0055114,nadph--cytochrome p450 reductase-like
Zoff161215	249.12	135	433.1	1093.37	1443.67	2179.95	112	448.61	339.21	81.93	161	68.7	12.26	6.76	21.38	53.81	82.92	108.16	5.66	22.22	17.08	4.16	8.33	3.4	13.4667	81.63	14.9867	5.29667	2.59971	0.000107344	-1.50052	0.803958	-3.94594	1.08e-06	0.154287	1	gi|695040430|ref|XP_009407793.1|	PREDICTED: abscisic acid 8'-hydroxylase 1-like [Musa acuminata subsp. malaccensis]	rcu:RCOM_0814150	cytochrome P450, putative (EC:1.14.13.79); K09843 (+)-abscisic acid 8'-hydroxylase [EC:1.14.13.93]	At4g19230	[QI] KOG0157 Cytochrome P450 CYP4/CYP19/CYP26 subfamilies	sp|Q05JG2|ABAH1_ORYSJ	Abscisic acid 8'-hydroxylase 1 OS=Oryza sativa subsp. japonica GN=CYP707A5 PE=2 SV=1	GO:0020037,abscisic acid 8 -hydroxylase 1-like; GO:0016705,abscisic acid 8 -hydroxylase 1-like; GO:0004497,abscisic acid 8 -hydroxylase 1-like; GO:0005506,abscisic acid 8 -hydroxylase 1-like; GO:0055114,abscisic acid 8 -hydroxylase 1-like
Zoff168243	0	0	0	63	0	1	0	0	0	0	0	1	0	0	0	3.1	0	0.05	0	0	0	0	0	0.05	0.001	1.05	0.001	0.0166667	10.0362	0.0354377	4.05889	1	-5.97728	0.103872	0	1	gi|241557118|ref|XP_002400171.1|	cytochrome P450, putative [Ixodes scapularis]	isc:IscW_ISCW020316	cytochrome P450, putative (EC:1.6.2.4); K00327 NADPH-ferrihemoprotein reductase [EC:1.6.2.4]	7297099	[C] KOG1158 NADP/FAD dependent oxidoreductase	sp|Q07994|NCPR_MUSDO	NADPH--cytochrome P450 reductase OS=Musca domestica PE=2 SV=1	GO:0005789,nadph--cytochrome p450 reductase; GO:0003958,nadph--cytochrome p450 reductase; GO:0005506,nadph--cytochrome p450 reductase; GO:0010181,nadph--cytochrome p450 reductase; GO:0005509,nadph--cytochrome p450 reductase; GO:0055114,nadph--cytochrome p450 reductase
Zoff169960	29	19	15	75	20	323	10	12	89	2	9	5	1.43	0.95	0.74	3.69	1.15	16.03	0.51	0.59	4.48	0.1	0.47	0.25	1.04	6.95667	1.86	0.273333	2.74181	0.0325044	-2.76657	0.349682	-4.66966	0.00113761	0.838719	1	gi|628341577|ref|XP_007747670.1|	phenylacetate 2-hydroxylase [Cladophialophora psammophila CBS 110553]	nfi:NFIA_040380	cytochrome P450 phenylacetate 2-hydroxylase, putative; K10437 phenylacetate 2-hydroxylase [EC:1.14.13.-]	At4g37330	[Q] KOG0156 Cytochrome P450 CYP2 subfamily	sp|Q9Y7G5|PHACA_EMEND	Phenylacetate 2-hydroxylase OS=Emericella nidulans GN=phacA PE=1 SV=1	GO:0055114,phenylacetate 2-hydroxylase; GO:0042318,phenylacetate 2-hydroxylase; GO:0009055,phenylacetate 2-hydroxylase; GO:0010124,phenylacetate 2-hydroxylase; GO:0020037,phenylacetate 2-hydroxylase; GO:0018631,phenylacetate 2-hydroxylase; GO:0005506,phenylacetate 2-hydroxylase
Zoff169969	98	312	151	209	218	43	131	180	268	6	8	6	4.82	15.63	7.45	10.29	12.52	2.13	6.62	8.91	13.5	0.3	0.41	0.3	9.3	8.31333	9.67667	0.336667	-0.161804	1	-4.84512	0.000263787	-4.62603	2.88e-05	0.0572795	1	gi|695060575|ref|XP_009418682.1|	PREDICTED: geraniol 8-hydroxylase-like [Musa acuminata subsp. malaccensis]	sbi:SORBI_07g024990	hypothetical protein	At4g12300	[Q] KOG0156 Cytochrome P450 CYP2 subfamily	sp|Q8VWZ7|C76B6_CATRO	Geraniol 8-hydroxylase OS=Catharanthus roseus GN=CYP76B6 PE=1 SV=1	--
Zoff176319	0	0	0	34	3	15.28	0	1	0	0	0	0	0	0	0	1.67	0.17	0.76	0	0.05	0	0	0	0	0.001	0.866667	0.0166667	0.001	9.75933	0.000743895	-4.05889	1	-9.75933	0.00275061	4.05889	1	gi|576989749|gb|EUC62468.1|	O-methylsterigmatocystin oxidoreductase [Rhizoctonia solani AG-3 Rhs1AP]	ppl:POSPLDRAFT_105726	hypothetical protein	At4g37360	[Q] KOG0156 Cytochrome P450 CYP2 subfamily	sp|O13345|ORDA_ASPPA	O-methylsterigmatocystin oxidoreductase OS=Aspergillus parasiticus GN=ordA PE=1 SV=1	GO:0046872,cytochrome p450 family protein; GO:0016491,cytochrome p450 family protein
Zoff177333	2	1	1	12	5	78	3	0	11	1	1	0	0.1	0.05	0.05	0.59	0.29	3.87	0.15	0	0.55	0.05	0.05	0	0.0666667	1.58333	0.233333	0.0333333	4.56986	0.00414989	-2.80735	1	-5.56986	0.00358302	1.80735	1	gi|628318961|ref|XP_007742150.1|	hypothetical protein A1O5_03349 [Cladophialophora psammophila CBS 110553]	pcs:Pc14g00120	Pc14g00120	Hs4503233	[Q] KOG0158 Cytochrome P450 CYP3/CYP5/CYP6/CYP9 subfamilies	sp|Q12612|TRI4_FUSSP	Trichodiene oxygenase OS=Fusarium sporotrichioides GN=TRI4 PE=3 SV=1	GO:0020037,cytochrome p450; GO:0016705,cytochrome p450; GO:0004497,cytochrome p450; GO:0005506,cytochrome p450; GO:0055114,cytochrome p450
Zoff178834	3	1	0	19	1	41	1	0	5	2	2	0	0.15	0.05	0	0.94	0.06	2.03	0.05	0	0.25	0.1	0.1	0	0.0666667	1.01	0.1	0.0666667	3.92125	0.0443533	-0.584963	1	-3.92125	0.0687497	0.584963	1	gi|656907425|gb|KEF53163.1|	hypothetical protein A1O9_10611 [Exophiala aquamarina CBS 119918]	pno:SNOG_12709	hypothetical protein	At4g37320	[Q] KOG0156 Cytochrome P450 CYP2 subfamily	sp|Q4WAW8|FTME_ASPFU	Fumitremorgin C synthase OS=Neosartorya fumigata (strain ATCC MYA-4609 / Af293 / CBS 101355 / FGSC A1100) GN=ftmP450-2 PE=3 SV=1	GO:0020037,cytochrome p450 oxidoreductase; GO:0016705,cytochrome p450 oxidoreductase; GO:0004497,cytochrome p450 oxidoreductase; GO:0005506,cytochrome p450 oxidoreductase; GO:0055114,cytochrome p450 oxidoreductase
Zoff179053	0	0	0	0	0	0	0	0	0	3	0	75	0	0	0	0	0	0	0	0	0	0.15	0	3.71	0.001	0.001	0.001	1.28667	0	1	10.3294	0.0999231	10.3294	0.0227997	0	1	gi|567988802|gb|ETL39074.1|	hypothetical protein L916_09500 [Phytophthora parasitica]	pif:PITG_21524	cytochrome P450, putative	At5g58860	[QI] KOG0157 Cytochrome P450 CYP4/CYP19/CYP26 subfamilies	sp|P48422|C86A1_ARATH	Cytochrome P450 86A1 OS=Arabidopsis thaliana GN=CYP86A1 PE=1 SV=2	--
Zoff181712	1745	901	1086	576	517	642	1921	1215	1591	5860	1566	3239	85.87	45.14	53.61	28.35	29.7	31.85	97.14	60.18	80.12	297.27	80.98	160.13	61.54	29.9667	79.1467	179.46	-1.03817	0.19116	1.18106	1	2.58223	0.00218196	0.363004	1	gi|695013365|ref|XP_009393464.1|	PREDICTED: cytochrome P450 71A1-like [Musa acuminata subsp. malaccensis]	pop:POPTR_575255	CYP71AP4; cytochrome P450	At4g13310	[Q] KOG0156 Cytochrome P450 CYP2 subfamily	sp|P24465|C71A1_PERAE	Cytochrome P450 71A1 OS=Persea americana GN=CYP71A1 PE=1 SV=2	GO:0046872,cytochrome p450 71a1-like; GO:0016491,cytochrome p450 71a1-like
Zoff182463	0	0	0	46	6	9	0	0	6	3	4	14	0	0	0	2.26	0.34	0.45	0	0	0.3	0.15	0.21	0.69	0.001	1.01667	0.1	0.35	9.98963	0.000342692	1.80735	1	-1.53842	0.759016	6.64386	1	gi|660963577|gb|KEP48914.1|	cytochrome P450 family protein [Rhizoctonia solani 123E]	lbc:LACBIDRAFT_315758	cytochrome P450	At3g14660	[QI] KOG0157 Cytochrome P450 CYP4/CYP19/CYP26 subfamilies	sp|Q9LUC8|C7A13_ARATH	Cytochrome P450 72A13 OS=Arabidopsis thaliana GN=CYP72A13 PE=2 SV=1	GO:0020037,cytochrome p450; GO:0016705,cytochrome p450; GO:0004497,cytochrome p450; GO:0005506,cytochrome p450; GO:0055114,cytochrome p450
Zoff183086	7	27	7	12	19	64	1	0	11	5	0	1	0.34	1.35	0.35	0.59	1.09	3.18	0.05	0	0.55	0.25	0	0.05	0.68	1.62	0.2	0.1	1.25239	0.827612	-1	1	-4.01792	0.00996836	-1.76553	1	gi|695039037|ref|XP_009407042.1|	PREDICTED: cytochrome P450 94B3-like [Musa acuminata subsp. malaccensis]	rcu:RCOM_1506510	cytochrome P450, putative (EC:1.14.14.1)	At3g48520	[QI] KOG0157 Cytochrome P450 CYP4/CYP19/CYP26 subfamilies	sp|Q9SMP5|C94B3_ARATH	Cytochrome P450 94B3 OS=Arabidopsis thaliana GN=CYP94B3 PE=2 SV=1	GO:0046872,cytochrome p450 94b3-like; GO:0016705,cytochrome p450 94b3-like; GO:0004497,cytochrome p450 94b3-like
Zoff187095	183	88	115	499	536	480	32	157	23	5	12	13	9.01	4.41	5.68	24.56	30.79	23.82	1.62	7.78	1.16	0.25	0.62	0.64	6.36667	26.39	3.52	0.503333	2.05138	0.000437435	-2.80599	0.19343	-5.71233	1.12e-11	-0.854963	1	gi|695018141|ref|XP_009396020.1|	PREDICTED: cytochrome P450 90B1-like isoform X2 [Musa acuminata subsp. malaccensis]	vvi:100241065	hypothetical protein LOC100241065; K09587 cytochrome P450, family 90, subfamily B, polypeptide 1 (steroid 22-alpha-hydroxylase) [EC:1.14.13.-]	At3g50660	[QI] KOG0157 Cytochrome P450 CYP4/CYP19/CYP26 subfamilies	sp|O64989|C90B1_ARATH	Cytochrome P450 90B1 OS=Arabidopsis thaliana GN=CYP90B1 PE=1 SV=2	GO:0016132,cytochrome p450 90b1-like; GO:0010012,cytochrome p450 90b1-like; GO:0016021,cytochrome p450 90b1-like; GO:0055114,cytochrome p450 90b1-like; GO:0009867,cytochrome p450 90b1-like; GO:0010358,cytochrome p450 90b1-like; GO:0016705,cytochrome p450 90b1-likeGO:0009055,cytochrome p450 90b1-likeGO:0016023,cytochrome p450 90b1-likeGO:0020037,cytochrome p450 90b1-likeGO:0009826,cytochrome p450 …
Zoff190642	37	21	7	14	44	2021	18	9	221	5	11	5	1.82	1.05	0.35	0.69	2.53	100.28	0.91	0.45	11.13	0.25	0.57	0.25	1.07333	34.5	4.16333	0.356667	5.00643	0.0147408	-3.54509	0.171434	-6.59588	0.00159304	1.95564	1	gi|656917044|gb|KEF62622.1|	hypothetical protein A1O9_00595 [Exophiala aquamarina CBS 119918]	act:ACLA_048760	cytochrome P450 monooxygenase, putative	Hs4503233	[Q] KOG0158 Cytochrome P450 CYP3/CYP5/CYP6/CYP9 subfamilies	sp|Q4WAW5|FTMC_ASPFU	Tryprostatin B 6-hydroxylase OS=Neosartorya fumigata (strain ATCC MYA-4609 / Af293 / CBS 101355 / FGSC A1100) GN=ftmP450-1 PE=3 SV=2	GO:0046872,p450 monooxygenase; GO:0016491,p450 monooxygenase
Zoff191832	0	0	0	92	1	0	0	0	0	0	0	0	0	0	0	4.53	0.06	0	0	0	0	0	0	0	0.001	1.53	0.001	0.001	10.5793	0.0207675	0	1	-10.5793	0.0260484	0	1	gi|675383137|gb|KFM76034.1|	Cytochrome P450 3A24, partial [Stegodyphus mimosarum]	isc:IscW_ISCW006560	cytochrome P450, putative (EC:1.14.14.1)	Hs4507383	[Q] KOG0158 Cytochrome P450 CYP3/CYP5/CYP6/CYP9 subfamilies	sp|P49430|THAS_RAT	Thromboxane-A synthase OS=Rattus norvegicus GN=Tbxas1 PE=2 SV=1	GO:0016491,thromboxane-a synthase-like
Zoff194646	1	1	0	7	1	25	0	1	9	0	0	0	0.05	0.05	0	0.34	0.06	1.24	0	0.05	0.45	0	0	0	0.0333333	0.546667	0.166667	0.001	4.03562	0.107626	-7.38082	1	-9.09452	0.0306043	2.32193	1	gi|656912893|gb|KEF58475.1|	hypothetical protein A1O9_06401 [Exophiala aquamarina CBS 119918]	afv:AFLA_122250	cytochrome P450, putative	--	--	sp|P38364|PID6_FUSSO	Pisatin demethylase OS=Fusarium solani subsp. pisi GN=PDA6-1 PE=3 SV=1	GO:0020037,cytochrome p450 oxidoreductase; GO:0016705,cytochrome p450 oxidoreductase; GO:0004497,cytochrome p450 oxidoreductase; GO:0005506,cytochrome p450 oxidoreductase; GO:0055114,cytochrome p450 oxidoreductase
Zoff194647	3	6	0	9	2	51	0	1	10	0	0	1	0.15	0.3	0	0.44	0.11	2.53	0	0.05	0.5	0	0	0.05	0.15	1.02667	0.183333	0.0166667	2.77493	0.269338	-3.45943	1	-5.94486	0.0137785	0.289507	1	gi|671162337|ref|XP_008721635.1|	hypothetical protein G647_00010 [Cladophialophora carrionii CBS 160.54]	pno:SNOG_11796	hypothetical protein	At2g27690	[QI] KOG0157 Cytochrome P450 CYP4/CYP19/CYP26 subfamilies	sp|Q12645|PID9_FUSSO	Pisatin demethylase OS=Fusarium solani subsp. pisi GN=PDAT9 PE=3 SV=1	GO:0020037,cytochrome p450; GO:0016705,cytochrome p450; GO:0004497,cytochrome p450; GO:0005506,cytochrome p450; GO:0055114,cytochrome p450
Zoff194738	14	12	7	87	18	434	2	7	91	2	4	1	0.69	0.6	0.35	4.28	1.03	21.53	0.1	0.35	4.58	0.1	0.21	0.05	0.546667	8.94667	1.67667	0.12	4.03262	0.00175147	-3.80449	0.241524	-6.22024	8.67e-05	1.61686	1	gi|656907673|gb|KEF53410.1|	3-hydroxyphenylacetate 6-hydroxylase [Exophiala aquamarina CBS 119918]	ani:AN1397.2	hypothetical protein; K10438 3-hydroxyphenylacetate 6-hydroxylase [EC:1.14.13.63]	At2g23190	[Q] KOG0156 Cytochrome P450 CYP2 subfamily	sp|Q078T0|PHACB_EMEND	3-hydroxyphenylacetate 6-hydroxylase OS=Emericella nidulans GN=phacB PE=1 SV=1	GO:0020037,3-hydroxyphenylacetate 6-hydroxylase; GO:0016705,3-hydroxyphenylacetate 6-hydroxylase; GO:0004497,3-hydroxyphenylacetate 6-hydroxylase; GO:0005506,3-hydroxyphenylacetate 6-hydroxylase; GO:0055114,3-hydroxyphenylacetate 6-hydroxylase
Zoff202278	39	25.79	27	78	76.44	48.37	54	12.82	21.73	1	11	6	1.92	1.29	1.33	3.84	4.39	2.4	2.73	0.63	1.09	0.05	0.57	0.3	1.51333	3.54333	1.48333	0.306667	1.22738	0.200556	-2.2741	0.512096	-3.53036	0.00138855	-0.028887	1	gi|695038687|ref|XP_009406861.1|	PREDICTED: cytochrome P450 714B2-like [Musa acuminata subsp. malaccensis]	sbi:SORBI_01g036360	hypothetical protein	At5g24910	[QI] KOG0157 Cytochrome P450 CYP4/CYP19/CYP26 subfamilies	sp|B6SSW8|C14B3_MAIZE	Cytochrome P450 714B3 OS=Zea mays GN=CYP714B3 PE=2 SV=1	GO:0046872,cytochrome p450 714b3-like; GO:0016491,cytochrome p450 714b3-like; GO:0016023,cytochrome p450 714b3-like; GO:0016020,cytochrome p450 714b3-like
Zoff202616	0	0	0	0	0	0	0	0	0	2	0	168	0	0	0	0	0	0	0	0	0	0.1	0	8.31	0.001	0.001	0.001	2.80333	0	1	11.4529	0.0674815	11.4529	0.0124173	0	1	gi|695415529|ref|XP_009526586.1|	hypothetical protein PHYSODRAFT_314852 [Phytophthora sojae]	pif:PITG_14013	cytochrome P450, putative	At1g34540	[QI] KOG0157 Cytochrome P450 CYP4/CYP19/CYP26 subfamilies	sp|Q9C788|C70B1_ARATH	Cytochrome P450 704B1 OS=Arabidopsis thaliana GN=CYP704B1 PE=2 SV=1	--
Zoff203202	0	0	0	33	2	4	0	0	3	21	1	8	0	0	0	1.62	0.11	0.2	0	0	0.15	1.07	0.05	0.4	0.001	0.643333	0.05	0.506667	9.32942	0.0132504	3.34104	0.765463	-0.34453	1	5.64386	1	gi|660960954|gb|KEP47352.1|	cytochrome P450 family monooxygenase [Rhizoctonia solani 123E]	scm:SCHCODRAFT_56510	hypothetical protein	At3g56630	[QI] KOG0157 Cytochrome P450 CYP4/CYP19/CYP26 subfamilies	sp|Q12573|CP52W_CANAP	Cytochrome P450 52E2 OS=Candida apicola GN=CYP52E2 PE=3 SV=1	GO:0020037,cytochrome p450 monooxygenase cyp63; GO:0016705,cytochrome p450 monooxygenase cyp63; GO:0004497,cytochrome p450 monooxygenase cyp63; GO:0005506,cytochrome p450 monooxygenase cyp63; GO:0055114,cytochrome p450 monooxygenase cyp63
Zoff203766	7715	4737	8470	7775	4970	10409	15112	14912	14365	26653	21047	32727	379.66	237.35	418.09	382.67	285.47	516.47	764.2	738.55	723.42	1352.05	1088.4	1617.96	345.033	394.87	742.057	1352.8	0.194642	1	0.866351	1	1.7765	0.0224149	1.10479	0.905225	gi|695014749|ref|XP_009394213.1|	PREDICTED: cytochrome P450 CYP72A219-like isoform X2 [Musa acuminata subsp. malaccensis]	sbi:SORBI_03g028600	hypothetical protein	At3g14690	[QI] KOG0157 Cytochrome P450 CYP4/CYP19/CYP26 subfamilies	sp|H2DH21|C7A29_PANGI	Cytochrome P450 CYP72A219 OS=Panax ginseng PE=2 SV=1	GO:0046872,cytochrome p450 cyp72a219-like; GO:0016023,cytochrome p450 cyp72a219-like; GO:0004497,cytochrome p450 cyp72a219-like; GO:0022900,cytochrome p450 cyp72a219-like
Zoff204672	3686	5974	3290	3089	3775	6209	2215	5373	4806	1522	934	1387	181.39	299.33	162.4	152.03	216.83	308.07	112.01	266.11	242.03	77.21	48.3	68.57	214.373	225.643	206.717	64.6933	0.0739187	1	-1.67597	0.34281	-1.80236	0.0265464	-0.0524707	1	gi|695005006|ref|XP_009388934.1|	PREDICTED: allene oxide synthase 1, chloroplastic-like [Musa acuminata subsp. malaccensis]	pop:POPTR_644172	CYP74A1; cytochrome P450 allene oxide synthase (EC:4.2.1.92); K01723 hydroperoxide dehydratase [EC:4.2.1.92]	--	--	sp|P48417|CP74_LINUS	Allene oxide synthase, chloroplastic OS=Linum usitatissimum GN=CYP74A PE=1 SV=1	GO:0009108,allene oxide synthase; GO:0008652,allene oxide synthase; GO:0009695,allene oxide synthase; GO:0009697,allene oxide synthase; GO:0016705,allene oxide synthase; GO:0005506,allene oxide synthase; GO:0010363,allene oxide synthaseGO:0019761,allene oxide synthaseGO:0010200,allene oxide synthaseGO:0009684,allene oxide synthaseGO:0047987,allene oxide synthaseGO:0031348,allene oxide synthaseGO:…
Zoff205902	44	1	45	144	86	96	0	52	21	8	20	22	2.17	0.05	2.22	7.09	4.94	4.76	0	2.58	1.06	0.41	1.03	1.09	1.48	5.59667	1.21333	0.843333	1.91897	0.269656	-0.524801	1	-2.73039	0.00287389	-0.286621	1	gi|695071858|ref|XP_009383021.1|	PREDICTED: cytochrome P450 734A6-like [Musa acuminata subsp. malaccensis]	osa:4344024	Os07g0635500	At2g46950	[QI] KOG0157 Cytochrome P450 CYP4/CYP19/CYP26 subfamilies	sp|B9X287|C7346_ORYSJ	Cytochrome P450 734A6 OS=Oryza sativa subsp. japonica GN=CYP734A6 PE=2 SV=1	GO:0020037,cytochrome p450 734a6-like; GO:0016705,cytochrome p450 734a6-like; GO:0004497,cytochrome p450 734a6-like; GO:0005506,cytochrome p450 734a6-like; GO:0055114,cytochrome p450 734a6-like
Zoff206943	899	1198	1698	2179	3683	4880	1156	4411	7005	254	321	528	44.24	60.03	83.82	107.24	211.55	242.13	58.46	218.46	352.77	12.88	16.6	26.1	62.6967	186.973	209.897	18.5267	1.57637	0.0213377	-3.502	0.0168727	-3.33516	1.82e-05	1.74322	0.524905	gi|672199702|ref|XP_008777682.1|	PREDICTED: cytochrome P450 704C1-like [Phoenix dactylifera]	vvi:100245370	hypothetical protein LOC100245370	At2g45510	[QI] KOG0157 Cytochrome P450 CYP4/CYP19/CYP26 subfamilies	sp|Q50EK3|C04C1_PINTA	Cytochrome P450 704C1 OS=Pinus taeda GN=CYP704C1 PE=2 SV=1	GO:0046872,cytochrome p450 704c1-like; GO:0016491,cytochrome p450 704c1-like
Zoff207855	35	2	3	32	3	262	6	0	15	3	1	2	1.72	0.1	0.15	1.57	0.17	13	0.3	0	0.76	0.15	0.05	0.1	0.656667	4.91333	0.353333	0.1	2.90347	0.329459	-1.82103	1	-5.61863	0.00343465	-0.894131	1	gi|628323733|ref|XP_007742968.1|	hypothetical protein A1O5_04170 [Cladophialophora psammophila CBS 110553]	bfu:BC1G_06047	hypothetical protein	CE01659	[Q] KOG0158 Cytochrome P450 CYP3/CYP5/CYP6/CYP9 subfamilies	sp|Q12645|PID9_FUSSO	Pisatin demethylase OS=Fusarium solani subsp. pisi GN=PDAT9 PE=3 SV=1	GO:0020037,cytochrome p450; GO:0016705,cytochrome p450; GO:0004497,cytochrome p450; GO:0005506,cytochrome p450; GO:0055114,cytochrome p450
Zoff210416	5	2	1	8	2	298	0	0	12	1	0	2	0.25	0.1	0.05	0.39	0.11	14.79	0	0	0.6	0.05	0	0.1	0.133333	5.09667	0.2	0.05	5.25644	0.0167744	-2	1	-6.67148	0.0065799	0.584963	1	gi|302881637|ref|XP_003039729.1|	hypothetical protein NECHADRAFT_50013 [Nectria haematococca mpVI 77-13-4]	ncr:NCU04089	hypothetical protein	CE01655	[Q] KOG0158 Cytochrome P450 CYP3/CYP5/CYP6/CYP9 subfamilies	sp|Q12645|PID9_FUSSO	Pisatin demethylase OS=Fusarium solani subsp. pisi GN=PDAT9 PE=3 SV=1	GO:0046872,pisatin demethylase; GO:0008152,pisatin demethylase; GO:0016491,pisatin demethylase
Zoff211626	817	978	666	1946	1169	3197	1008	2305	1372	3006	3145	3170	40.21	49	32.87	95.78	67.15	158.63	50.97	114.16	69.09	152.49	162.64	156.72	40.6933	107.187	78.0733	157.283	1.39726	0.0474358	1.01046	1	0.55324	1	0.940037	1	gi|695013202|ref|XP_009393377.1|	PREDICTED: cytochrome P450 94C1-like [Musa acuminata subsp. malaccensis]	osa:9271540	Os01g0858350	At2g27690	[QI] KOG0157 Cytochrome P450 CYP4/CYP19/CYP26 subfamilies	sp|Q9ZUX1|C94C1_ARATH	Cytochrome P450 94C1 OS=Arabidopsis thaliana GN=CYP94C1 PE=2 SV=1	GO:0071229,cytochrome p450 94c1-like; GO:0022900,cytochrome p450 94c1-like; GO:0009753,cytochrome p450 94c1-like; GO:0009628,cytochrome p450 94c1-like; GO:0016705,cytochrome p450 94c1-like; GO:1901701,cytochrome p450 94c1-like; GO:0004497,cytochrome p450 94c1-likeGO:0016023,cytochrome p450 94c1-likeGO:0009755,cytochrome p450 94c1-likeGO:0020037,cytochrome p450 94c1-likeGO:0005506,cytochrome p450 …
Zoff213273	5	14	6	77	16	1042	4	3	172	7	4	4	0.25	0.7	0.3	3.79	0.92	51.7	0.2	0.15	8.66	0.36	0.21	0.2	0.416667	18.8033	3.00333	0.256667	5.49595	0.000794119	-3.5486	0.326677	-6.19495	0.000498023	2.8496	0.861765	gi|729186962|emb|CEJ87076.1|	hypothetical protein VHEMI04293 [Torrubiella hemipterigena]	ssl:SS1G_07180	hypothetical protein	Hs5729796	[QI] KOG0157 Cytochrome P450 CYP4/CYP19/CYP26 subfamilies	sp|Q4WAW5|FTMC_ASPFU	Tryprostatin B 6-hydroxylase OS=Neosartorya fumigata (strain ATCC MYA-4609 / Af293 / CBS 101355 / FGSC A1100) GN=ftmP450-1 PE=3 SV=2	GO:0046872,cytochrome p450 monooxygenase; GO:0016491,cytochrome p450 monooxygenase
Zoff213818	0	2	0	7	6	201	5	3	21	2	0	0	0	0.1	0	0.34	0.34	9.97	0.25	0.15	1.06	0.1	0	0	0.0333333	3.55	0.486667	0.0333333	6.73471	0.00191016	-3.8679	0.473885	-6.73471	0.00380081	3.8679	0.589988	gi|656907425|gb|KEF53163.1|	hypothetical protein A1O9_10611 [Exophiala aquamarina CBS 119918]	pno:SNOG_12709	hypothetical protein	At4g37330	[Q] KOG0156 Cytochrome P450 CYP2 subfamily	sp|O13345|ORDA_ASPPA	O-methylsterigmatocystin oxidoreductase OS=Aspergillus parasiticus GN=ordA PE=1 SV=1	GO:0020037,cytochrome p450 oxidoreductase; GO:0016705,cytochrome p450 oxidoreductase; GO:0004497,cytochrome p450 oxidoreductase; GO:0005506,cytochrome p450 oxidoreductase; GO:0055114,cytochrome p450 oxidoreductase
Zoff215340	87	206	141	253	968	1641	34	182	2196	5	5	12	4.28	10.32	6.96	12.45	55.6	81.42	1.72	9.01	110.59	0.25	0.26	0.59	7.18667	49.8233	40.44	0.366667	2.79343	0.00187768	-6.78517	0.00617324	-7.08621	3.52e-10	2.49239	0.797501	gi|695014477|ref|XP_009394066.1|	PREDICTED: cytochrome P450 94B3-like [Musa acuminata subsp. malaccensis]	rcu:RCOM_1506510	cytochrome P450, putative (EC:1.14.14.1)	At5g63450	[QI] KOG0157 Cytochrome P450 CYP4/CYP19/CYP26 subfamilies	sp|Q9FMV7|C94B1_ARATH	Cytochrome P450 94B1 OS=Arabidopsis thaliana GN=CYP94B1 PE=2 SV=1	GO:0046872,cytochrome p450 94b3-like; GO:0016705,cytochrome p450 94b3-like; GO:0004497,cytochrome p450 94b3-like
Zoff216312	3186	2344	1538	5542	4239	7489	2069	5091	1848	653	2728	2273	156.79	117.45	75.92	272.76	243.48	371.58	104.63	252.14	93.06	33.13	141.07	112.37	116.72	295.94	149.943	95.5233	1.34225	0.0419456	-0.650492	1	-1.63138	0.143177	0.361366	1	gi|695007269|ref|XP_009390176.1|	PREDICTED: abscisic acid 8'-hydroxylase 4 [Musa acuminata subsp. malaccensis]	vvi:100267651	hypothetical protein LOC100267651	At1g19630	[QI] KOG0157 Cytochrome P450 CYP4/CYP19/CYP26 subfamilies	sp|Q9LJK2|ABAH4_ARATH	Abscisic acid 8'-hydroxylase 4 OS=Arabidopsis thaliana GN=CYP707A4 PE=2 SV=2	GO:0046872,abscisic acid 8 -hydroxylase 4; GO:0016491,abscisic acid 8 -hydroxylase 4
Zoff217872	0	0	0	0	0	0	0	1	0	6	0	109	0	0	0	0	0	0	0	0.05	0	0.3	0	5.39	0.001	0.001	0.0166667	1.89667	0	1	6.83036	0.108734	10.8893	0.00959467	4.05889	1	gi|570983851|gb|ETP43605.1|	hypothetical protein F442_09690 [Phytophthora parasitica P10297]	pif:PITG_14013	cytochrome P450, putative	At1g34540	[QI] KOG0157 Cytochrome P450 CYP4/CYP19/CYP26 subfamilies	sp|P48422|C86A1_ARATH	Cytochrome P450 86A1 OS=Arabidopsis thaliana GN=CYP86A1 PE=1 SV=2	--
Zoff218253	0	0	0	0	0	0	0	0	1.29	7	0	88.47	0	0	0	0	0	0	0	0	0.06	0.36	0	4.37	0.001	0.001	0.02	1.57667	0	1	6.30073	0.121262	10.6227	0.0102535	4.32193	1	gi|695406721|ref|XP_009524184.1|	hypothetical protein PHYSODRAFT_360099 [Phytophthora sojae]	pif:PITG_10160	NADPH-cytochrome P450 reductase, putative; K00327 NADPH-ferrihemoprotein reductase [EC:1.6.2.4]	Hs22049499	[C] KOG1158 NADP/FAD dependent oxidoreductase	sp|P37039|NCPR_CAVPO	NADPH--cytochrome P450 reductase OS=Cavia porcellus GN=POR PE=2 SV=2	GO:0016491,nadph--cytochrome p450 reductase; GO:0005506,nadph--cytochrome p450 reductase; GO:0010181,nadph--cytochrome p450 reductase; GO:0044444,nadph--cytochrome p450 reductase; GO:0055114,nadph--cytochrome p450 reductase
Zoff219541	9	5	4	52	14	102	11	1	57	1	0	0	0.44	0.25	0.2	2.56	0.8	5.06	0.56	0.05	2.87	0.05	0	0	0.296667	2.80667	1.16	0.0166667	3.24194	0.00177437	-6.12102	0.0856941	-7.39575	9.56e-06	1.96721	1	gi|628350581|ref|XP_007750544.1|	C-22 sterol desaturase [Cladophialophora psammophila CBS 110553]	cpw:CPC735_068810	C-22 sterol desaturase, putative (EC:1.14.14.-); K09831 C-22 sterol desaturase [EC:1.14.14.-]	SPAC19A8.04	[QI] KOG0157 Cytochrome P450 CYP4/CYP19/CYP26 subfamilies	sp|O13820|ERG5_SCHPO	Cytochrome P450 61 OS=Schizosaccharomyces pombe (strain 972 / ATCC 24843) GN=erg5 PE=1 SV=3	GO:0055114,cytochrome p450 61; GO:0006281,cytochrome p450 61; GO:0016705,cytochrome p450 61; GO:0003677,cytochrome p450 61; GO:0004497,cytochrome p450 61; GO:0005524,cytochrome p450 61; GO:0004386,cytochrome p450 61GO:0020037,cytochrome p450 61GO:0005506,cytochrome p450 61GO:0005634,cytochrome p450 61
Zoff219844	440	378	479	93	80	127.03	273.48	128	168.27	312	313	152	21.65	18.94	23.64	4.58	4.6	6.3	13.83	6.34	8.47	15.83	16.19	7.51	21.41	5.16	9.54667	13.1767	-2.05284	7.23e-05	0.464916	1	1.35254	0.265923	-1.16522	1	gi|695038298|ref|XP_009406656.1|	PREDICTED: premnaspirodiene oxygenase-like [Musa acuminata subsp. malaccensis]	sbi:SORBI_04g005760	hypothetical protein	At5g07990	[Q] KOG0156 Cytochrome P450 CYP2 subfamily	sp|A6YIH8|C7D55_HYOMU	Premnaspirodiene oxygenase OS=Hyoscyamus muticus GN=CYP71D55 PE=1 SV=1	GO:0046872,premnaspirodiene oxygenase-like; GO:0016491,premnaspirodiene oxygenase-like
Zoff221390	29	31	7	75	35	1067	23	8	225	5	2	2	1.43	1.55	0.35	3.69	2.01	52.94	1.16	0.4	11.33	0.25	0.1	0.1	1.11	19.5467	4.29667	0.15	4.13829	0.00862631	-4.84018	0.0496942	-7.02582	5.41e-05	1.95266	1	gi|656915235|gb|KEF60814.1|	hypothetical protein A1O9_02376 [Exophiala aquamarina CBS 119918]	pno:SNOG_12709	hypothetical protein	At4g37330	[Q] KOG0156 Cytochrome P450 CYP2 subfamily	sp|O13345|ORDA_ASPPA	O-methylsterigmatocystin oxidoreductase OS=Aspergillus parasiticus GN=ordA PE=1 SV=1	GO:0020037,cytochrome p450; GO:0016705,cytochrome p450; GO:0004497,cytochrome p450; GO:0005506,cytochrome p450; GO:0055114,cytochrome p450
Zoff223896	0	1	1	0	0	0	0	0	0	0	0	187	0	0.05	0.05	0	0	0	0	0	0	0	0	9.24	0.0333333	0.001	0.001	3.08	-5.05889	1	11.5887	0.121409	11.5887	0.0309262	-5.05889	1	gi|325182055|emb|CCA16508.1|	unnamed protein product [Albugo laibachii Nc14]	pif:PITG_03059	cytochrome P450, putative	At2g45510	[QI] KOG0157 Cytochrome P450 CYP4/CYP19/CYP26 subfamilies	sp|Q50EK3|C04C1_PINTA	Cytochrome P450 704C1 OS=Pinus taeda GN=CYP704C1 PE=2 SV=1	--
Zoff223897	0	0	0	0	0	0	0	0	0	3	0	61	0	0	0	0	0	0	0	0	0	0.15	0	3.02	0.001	0.001	0.001	1.05667	0	1	10.0453	0.124666	10.0453	0.0306397	0	1	gi|570981640|gb|ETP42023.1|	hypothetical protein F442_11037 [Phytophthora parasitica P10297]	pif:PITG_03059	cytochrome P450, putative	At2g45510	[QI] KOG0157 Cytochrome P450 CYP4/CYP19/CYP26 subfamilies	sp|Q50EK3|C04C1_PINTA	Cytochrome P450 704C1 OS=Pinus taeda GN=CYP704C1 PE=2 SV=1	--
Zoff224397	5793	3992	6438	2586	2023	2160	4162	4789	4914	6235	6620	5198	285.08	200.02	317.79	127.28	116.2	107.17	210.47	237.19	247.47	316.29	342.34	256.98	267.63	116.883	231.71	305.203	-1.19517	0.0441624	0.39745	1	1.3847	0.0954771	-0.20792	1	gi|695014749|ref|XP_009394213.1|	PREDICTED: cytochrome P450 CYP72A219-like isoform X2 [Musa acuminata subsp. malaccensis]	sbi:SORBI_03g028600	hypothetical protein	At3g14690	[QI] KOG0157 Cytochrome P450 CYP4/CYP19/CYP26 subfamilies	sp|H2DH21|C7A29_PANGI	Cytochrome P450 CYP72A219 OS=Panax ginseng PE=2 SV=1	GO:0046872,cytochrome p450 cyp72a219-like; GO:0016023,cytochrome p450 cyp72a219-like; GO:0004497,cytochrome p450 cyp72a219-like; GO:0022900,cytochrome p450 cyp72a219-like
Zoff224398	526	70	274	59	54	36	1168.5	46	181	1384.16	694.3	796.29	25.89	3.51	13.53	2.9	3.1	1.79	59.09	2.28	9.12	70.22	35.9	39.37	14.31	2.59667	23.4967	48.4967	-2.46229	0.0121344	1.04543	1	4.22315	7.18e-08	0.715432	1	gi|403399730|sp|E3W9C4.1|C71A1_ZINZE	RecName: Full=Alpha-humulene 10-hydroxylase [Zingiber zerumbet]	vvi:100246036	hypothetical protein LOC100246036	At5g25130	[Q] KOG0156 Cytochrome P450 CYP2 subfamily	sp|E3W9C4|C71A1_ZINZE	Alpha-humulene 10-hydroxylase OS=Zingiber zerumbet GN=CYP71BA1 PE=1 SV=1	GO:0016491,premnaspirodiene oxygenase-like; GO:0005488,premnaspirodiene oxygenase-like
Zoff224401	621	111	250	129	121	178	2190.66	114	313	4915.77	2183.7	1854.71	30.56	5.56	12.34	6.35	6.95	8.83	110.78	5.65	15.76	249.37	112.93	91.69	16.1533	7.37667	44.0633	151.33	-1.13079	0.578729	1.78005	0.886597	4.35859	3.97e-08	1.44775	1	gi|403399730|sp|E3W9C4.1|C71A1_ZINZE	RecName: Full=Alpha-humulene 10-hydroxylase [Zingiber zerumbet]	vvi:100246293	hypothetical protein LOC100246293	At3g26300	[Q] KOG0156 Cytochrome P450 CYP2 subfamily	sp|E3W9C4|C71A1_ZINZE	Alpha-humulene 10-hydroxylase OS=Zingiber zerumbet GN=CYP71BA1 PE=1 SV=1	GO:0016020,premnaspirodiene oxygenase-like; GO:0046872,premnaspirodiene oxygenase-like; GO:0016491,premnaspirodiene oxygenase-like
Zoff224886	881	2109	401	1818	773	1444	810	300	254	15	58	25	43.36	105.67	19.79	89.48	44.4	71.65	40.96	14.86	12.79	0.76	3	1.24	56.2733	68.51	22.87	1.66667	0.283863	1	-3.77842	0.0167246	-5.36128	3.49e-09	-1.299	1	gi|695042434|ref|XP_009408870.1|	PREDICTED: cytochrome P450 711A1-like [Musa acuminata subsp. malaccensis]	osa:4341325	Os06g0565100; K00517 [EC:1.14.-.-]	At2g26170	[Q] KOG0158 Cytochrome P450 CYP3/CYP5/CYP6/CYP9 subfamilies	sp|B9DFU2|MAX1_ARATH	Cytochrome P450 711A1 OS=Arabidopsis thaliana GN=CYP711A1 PE=2 SV=1	GO:0044763,cytochrome p450 711a1-like; GO:0016491,cytochrome p450 711a1-like; GO:0046872,cytochrome p450 711a1-like; GO:0044710,cytochrome p450 711a1-like; GO:0065007,cytochrome p450 711a1-like
Zoff224934	35	298	66	1	10	5	53	25	16	13	12	6	1.72	14.93	3.26	0.05	0.57	0.25	2.68	1.24	0.81	0.66	0.62	0.3	6.63667	0.29	1.57667	0.526667	-4.51633	0.000313953	-1.58192	0.874106	0.860837	1	-2.07358	0.708849	gi|695003010|ref|XP_009383226.1|	PREDICTED: cytochrome P450 78A6-like [Musa acuminata subsp. malaccensis]	osa:4346234	Os08g0547300	At2g46660	[Q] KOG0156 Cytochrome P450 CYP2 subfamily	sp|Q9ZNR0|C78A6_ARATH	Cytochrome P450 78A6 OS=Arabidopsis thaliana GN=CYP78A6 PE=2 SV=1	GO:0046872,cytochrome p450 78a6-like; GO:0016705,cytochrome p450 78a6-like; GO:0004497,cytochrome p450 78a6-like
Zoff225741	4777	3029	5856	1429	1330	1195	3983	3540	3446	4827	2993	3458	235.08	151.77	289.06	70.33	76.39	59.29	201.42	175.33	173.54	244.86	154.78	170.96	225.303	68.67	183.43	190.2	-1.71412	0.00180533	0.0522876	1	1.46977	0.0806352	-0.296639	1	gi|695079834|ref|XP_009387345.1|	PREDICTED: cytochrome P450 71A1-like [Musa acuminata subsp. malaccensis]	vvi:100265573	hypothetical protein LOC100265573	At3g26310	[Q] KOG0156 Cytochrome P450 CYP2 subfamily	sp|O81970|C71A9_SOYBN	Cytochrome P450 71A9 OS=Glycine max GN=CYP71A9 PE=2 SV=1	GO:0020037,cytochrome p450 71a1-like; GO:0016705,cytochrome p450 71a1-like; GO:0004497,cytochrome p450 71a1-like; GO:0005506,cytochrome p450 71a1-like; GO:0055114,cytochrome p450 71a1-like
Zoff227707	10	8	17	5	13	53	4	0	12	0	0	0	0.49	0.4	0.84	0.25	0.75	2.63	0.2	0	0.6	0	0	0	0.576667	1.21	0.266667	0.001	1.0692	1	-8.05889	0.592177	-10.2408	0.000841015	-1.1127	1	gi|695014288|ref|XP_009393959.1|	PREDICTED: cytokinin hydroxylase-like [Musa acuminata subsp. malaccensis]	osa:4331202	Os02g0824100	At5g52400	[QI] KOG0157 Cytochrome P450 CYP4/CYP19/CYP26 subfamilies	sp|B9G934|C14C3_ORYSJ	Cytochrome P450 714C3 OS=Oryza sativa subsp. japonica GN=CYP714C3 PE=3 SV=2	GO:0046872,cytokinin hydroxylase-like; GO:0016491,cytokinin hydroxylase-like; GO:0016023,cytokinin hydroxylase-like
Zoff228214	5	1	3	16	13	263	0	0	49	1	1	1	0.25	0.05	0.15	0.79	0.75	13.05	0	0	2.47	0.05	0.05	0.05	0.15	4.86333	0.823333	0.05	5.01891	0.00196604	-4.04148	0.723768	-6.60387	0.000431396	2.45651	1	gi|628324608|ref|XP_007743138.1|	hypothetical protein A1O5_04341 [Cladophialophora psammophila CBS 110553]	nfi:NFIA_094190	Cytochrome P450 oxidoreductase, putative	At4g12300	[Q] KOG0156 Cytochrome P450 CYP2 subfamily	sp|O13345|ORDA_ASPPA	O-methylsterigmatocystin oxidoreductase OS=Aspergillus parasiticus GN=ordA PE=1 SV=1	GO:0046872,cytochrome p450; GO:0016491,cytochrome p450
Zoff228248	367	424	415	373	238	251	478	992	903	1386	1087	1074	18.06	21.24	20.49	18.36	13.67	12.45	24.17	49.13	45.47	70.31	56.21	53.1	19.93	14.8267	39.59	59.8733	-0.426747	1	0.596778	1	2.01372	0.00727179	0.990194	1	gi|695009842|ref|XP_009391571.1|	PREDICTED: cytochrome P450 90A1 isoform X1 [Musa acuminata subsp. malaccensis]	osa:4351461	Os12g0139300; K09588 cytochrome P450, family 90, subfamily A, polypeptide 1 [EC:1.14.-.-]	At5g05690	[QI] KOG0157 Cytochrome P450 CYP4/CYP19/CYP26 subfamilies	sp|Q42569|C90A1_ARATH	Cytochrome P450 90A1 OS=Arabidopsis thaliana GN=CYP90A1 PE=2 SV=1	GO:0009908,cytochrome p450 90a1; GO:0032989,cytochrome p450 90a1; GO:0016020,cytochrome p450 90a1; GO:0016023,cytochrome p450 90a1; GO:0060560,cytochrome p450 90a1; GO:0045229,cytochrome p450 90a1; GO:0020037,cytochrome p450 90a1GO:1901576,cytochrome p450 90a1GO:0009411,cytochrome p450 90a1GO:0048513,cytochrome p450 90a1GO:0016705,cytochrome p450 90a1GO:0004497,cytochrome p450 90a1GO:0010817,cyto…
Zoff230438	1623.3	298.69	977.04	173.88	134.93	106.91	4028.57	113.63	573.98	4005.82	506.82	2482.06	79.88	14.97	48.23	8.56	7.75	5.3	203.72	5.63	28.91	203.21	26.21	122.71	47.6933	7.20333	79.42	117.377	-2.72705	0.00059548	0.563571	1	4.02634	6.2e-05	0.735715	1	gi|403399730|sp|E3W9C4.1|C71A1_ZINZE	RecName: Full=Alpha-humulene 10-hydroxylase [Zingiber zerumbet]	vvi:100246293	hypothetical protein LOC100246293	At3g26300	[Q] KOG0156 Cytochrome P450 CYP2 subfamily	sp|E3W9C4|C71A1_ZINZE	Alpha-humulene 10-hydroxylase OS=Zingiber zerumbet GN=CYP71BA1 PE=1 SV=1	GO:0046872,premnaspirodiene oxygenase-like; GO:0016491,premnaspirodiene oxygenase-like
Zoff231158	454	59	210	114	82	204	465	565	639	3215	1804	2949	22.34	2.96	10.37	5.61	4.71	10.12	23.51	27.98	32.18	163.09	93.29	145.79	11.89	6.81333	27.89	134.057	-0.803316	1	2.26502	0.0661224	4.29834	1.89e-08	1.23	1	gi|695030700|ref|XP_009402829.1|	PREDICTED: cytochrome P450 85A1-like [Musa acuminata subsp. malaccensis]	osa:4333399	Os03g0602300	At5g38970	[QI] KOG0157 Cytochrome P450 CYP4/CYP19/CYP26 subfamilies	sp|Q8GSQ1|C85A1_ORYSJ	Cytochrome P450 85A1 OS=Oryza sativa subsp. japonica GN=CYP85A1 PE=1 SV=1	GO:0016132,cytochrome p450 85a1-like; GO:0016021,cytochrome p450 85a1-like; GO:0022900,cytochrome p450 85a1-like; GO:0001578,cytochrome p450 85a1-like; GO:0010268,cytochrome p450 85a1-like; GO:0009647,cytochrome p450 85a1-like; GO:0016705,cytochrome p450 85a1-likeGO:0004497,cytochrome p450 85a1-likeGO:0020037,cytochrome p450 85a1-likeGO:0005506,cytochrome p450 85a1-like
Zoff232161	272	709	88	365	481	390	229	403	209	34	21	80	13.39	35.52	4.34	17.96	27.63	19.35	11.58	19.96	10.53	1.72	1.09	3.96	17.75	21.6467	14.0233	2.25667	0.286326	1	-2.63556	0.0859534	-3.26188	0.000297027	-0.33999	1	gi|695061280|ref|XP_009419067.1|	PREDICTED: cytochrome P450 78A5-like [Musa acuminata subsp. malaccensis]	vvi:100253660	hypothetical protein LOC100253660	At1g13710	[Q] KOG0156 Cytochrome P450 CYP2 subfamily	sp|Q9LMX7|C78A5_ARATH	Cytochrome P450 78A5 OS=Arabidopsis thaliana GN=CYP78A5 PE=2 SV=1	GO:0020037,cytochrome p450 78a5-like; GO:0016705,cytochrome p450 78a5-like; GO:0004497,cytochrome p450 78a5-like; GO:0005506,cytochrome p450 78a5-like; GO:0009055,cytochrome p450 78a5-like; GO:0055114,cytochrome p450 78a5-like
Zoff232162	43	143	26	47	14	68	91	424	146	399	225	119	2.12	7.16	1.28	2.31	0.8	3.37	4.6	21	7.35	20.24	11.64	5.88	3.52	2.16	10.9833	12.5867	-0.704544	1	0.19658	1	2.54279	0.020285	1.64167	1	gi|695072915|ref|XP_009383603.1|	PREDICTED: cytochrome P450 78A11 [Musa acuminata subsp. malaccensis]	sbi:SORBI_01g022690	hypothetical protein	At5g09970	[Q] KOG0156 Cytochrome P450 CYP2 subfamily	sp|P48420|C78A1_MAIZE	Cytochrome P450 78A1 OS=Zea mays GN=CYP78A1 PE=2 SV=1	GO:0004497,cytochrome p450 78a7-like; GO:0005506,cytochrome p450 78a7-like; GO:0020037,cytochrome p450 78a7-like; GO:0016705,cytochrome p450 78a7-like; GO:0048513,cytochrome p450 78a7-like; GO:0016020,cytochrome p450 78a7-like; GO:0040008,cytochrome p450 78a7-likeGO:0055114,cytochrome p450 78a7-like
Zoff243516	8	12	0	14	7.28	518.58	3	1	70.68	1	6	2	0.39	0.6	0	0.69	0.42	25.73	0.15	0.05	3.56	0.05	0.31	0.1	0.33	8.94667	1.25333	0.153333	4.76081	0.0381018	-3.03103	0.65164	-5.86661	0.00556076	1.92523	1	gi|628306670|ref|XP_007740501.1|	hypothetical protein A1O5_01695 [Cladophialophora psammophila CBS 110553]	nfi:NFIA_094190	Cytochrome P450 oxidoreductase, putative	At4g12300	[Q] KOG0156 Cytochrome P450 CYP2 subfamily	sp|Q4WAW8|FTME_ASPFU	Fumitremorgin C synthase OS=Neosartorya fumigata (strain ATCC MYA-4609 / Af293 / CBS 101355 / FGSC A1100) GN=ftmP450-2 PE=3 SV=1	GO:0020037,cytochrome p450; GO:0016705,cytochrome p450; GO:0004497,cytochrome p450; GO:0005506,cytochrome p450; GO:0055114,cytochrome p450
Zoff245487	516	619	532	566	459	1371	1798	120	149	57	244	107	25.39	31.01	26.26	27.86	26.36	68.03	90.92	5.94	7.5	2.89	12.62	5.29	27.5533	40.75	34.7867	6.93333	0.564573	1	-2.32691	0.561058	-2.55518	0.0145559	0.336308	1	gi|695074657|ref|XP_009384541.1|	PREDICTED: cytochrome P450 84A1-like [Musa acuminata subsp. malaccensis]	pop:POPTR_836596	CAld5H/F5H1, CYP84A10; coniferylaldehyde 5- hydroxylase; K09755 ferulate-5-hydroxylase [EC:1.14.-.-]	At4g36220	[Q] KOG0156 Cytochrome P450 CYP2 subfamily	sp|Q42600|C84A1_ARATH	Cytochrome P450 84A1 OS=Arabidopsis thaliana GN=CYP84A1 PE=1 SV=1	GO:0020037,cytochrome p450 84a1-like; GO:0016705,cytochrome p450 84a1-like; GO:0004497,cytochrome p450 84a1-like; GO:0005506,cytochrome p450 84a1-like; GO:0055114,cytochrome p450 84a1-like
Zoff247548	31	26	17	170	39	662	13	7	152	2	5	8	1.53	1.3	0.84	8.37	2.24	32.85	0.66	0.35	7.65	0.1	0.26	0.4	1.22333	14.4867	2.88667	0.253333	3.56584	0.00185382	-3.5103	0.200996	-5.83754	3.1e-05	1.23859	1	gi|656907145|gb|KEF52884.1|	NADPH-cytochrome P450 reductase [Exophiala aquamarina CBS 119918]	afm:AFUA_6G10990	NADPH cytochrome P450 reductase (CprA) (EC:1.6.2.4); K00327 NADPH-ferrihemoprotein reductase [EC:1.6.2.4]	SPBC365.17	[C] KOG1158 NADP/FAD dependent oxidoreductase	sp|Q4WM67|NCPR_ASPFU	NADPH--cytochrome P450 reductase OS=Neosartorya fumigata (strain ATCC MYA-4609 / Af293 / CBS 101355 / FGSC A1100) GN=cprA PE=1 SV=1	GO:0016021,nadph-cytochrome p450 reductase; GO:0055114,nadph-cytochrome p450 reductase; GO:0003958,nadph-cytochrome p450 reductase; GO:0006790,nadph-cytochrome p450 reductase; GO:0006091,nadph-cytochrome p450 reductase; GO:0050311,nadph-cytochrome p450 reductase; GO:0005789,nadph-cytochrome p450 reductaseGO:0010181,nadph-cytochrome p450 reductaseGO:0005506,nadph-cytochrome p450 reductaseGO:000588…
Zoff248505	141	353	206	602	548	770	447	290	911	1260	470	1087	6.94	17.69	10.17	29.63	31.48	38.21	22.6	14.36	45.88	63.92	24.3	53.74	11.6	33.1067	27.6133	47.32	1.513	0.0353178	0.777085	1	0.515328	1	1.25124	1	gi|695027507|ref|XP_009401100.1|	PREDICTED: cytochrome P450 94C1-like [Musa acuminata subsp. malaccensis]	vvi:100261934	hypothetical protein	At2g27690	[QI] KOG0157 Cytochrome P450 CYP4/CYP19/CYP26 subfamilies	sp|Q9ZUX1|C94C1_ARATH	Cytochrome P450 94C1 OS=Arabidopsis thaliana GN=CYP94C1 PE=2 SV=1	GO:0071229,cytochrome p450 94c1-like; GO:0009753,cytochrome p450 94c1-like; GO:0044710,cytochrome p450 94c1-like; GO:0009628,cytochrome p450 94c1-like; GO:0046872,cytochrome p450 94c1-like; GO:0016705,cytochrome p450 94c1-like; GO:1901701,cytochrome p450 94c1-likeGO:0004497,cytochrome p450 94c1-likeGO:0009755,cytochrome p450 94c1-likeGO:0006950,cytochrome p450 94c1-like
Zoff248506	142	518	228	396	714	1929	226	446	1041	108	95	81	6.99	25.95	11.25	19.49	41.01	95.71	11.43	22.09	52.42	5.48	4.91	4	14.73	52.07	28.6467	4.79667	1.82169	0.112736	-2.57826	0.0931833	-3.44035	0.000230623	0.95961	1	gi|695027507|ref|XP_009401100.1|	PREDICTED: cytochrome P450 94C1-like [Musa acuminata subsp. malaccensis]	vvi:100261934	hypothetical protein	At2g27690	[QI] KOG0157 Cytochrome P450 CYP4/CYP19/CYP26 subfamilies	sp|Q9ZUX1|C94C1_ARATH	Cytochrome P450 94C1 OS=Arabidopsis thaliana GN=CYP94C1 PE=2 SV=1	GO:0071229,cytochrome p450 94c1-like; GO:0009753,cytochrome p450 94c1-like; GO:0044710,cytochrome p450 94c1-like; GO:0009628,cytochrome p450 94c1-like; GO:0046872,cytochrome p450 94c1-like; GO:0016705,cytochrome p450 94c1-like; GO:1901701,cytochrome p450 94c1-likeGO:0004497,cytochrome p450 94c1-likeGO:0009755,cytochrome p450 94c1-likeGO:0006950,cytochrome p450 94c1-like
Zoff251597	936	1716	2229	2863	6830	16594	867	9523.79	13754	446	413	688	46.06	85.98	110.03	140.91	392.31	823.35	43.84	471.69	692.65	22.62	21.36	34.01	80.69	452.19	402.727	25.9967	2.48647	0.00368438	-3.9534	0.0190556	-4.12053	9.2e-06	2.31934	0.371935	gi|695022658|ref|XP_009398465.1|	PREDICTED: abscisic acid 8'-hydroxylase 1-like [Musa acuminata subsp. malaccensis]	zma:100383693	hypothetical protein LOC100383693; K09843 (+)-abscisic acid 8'-hydroxylase [EC:1.14.13.93]	At5g45340	[QI] KOG0157 Cytochrome P450 CYP4/CYP19/CYP26 subfamilies	sp|Q05JG2|ABAH1_ORYSJ	Abscisic acid 8'-hydroxylase 1 OS=Oryza sativa subsp. japonica GN=CYP707A5 PE=2 SV=1	GO:0016021,abscisic acid 8 -hydroxylase 1-like; GO:0055114,abscisic acid 8 -hydroxylase 1-like; GO:0010295,abscisic acid 8 -hydroxylase 1-like; GO:0046345,abscisic acid 8 -hydroxylase 1-like; GO:0020037,abscisic acid 8 -hydroxylase 1-like; GO:0005789,abscisic acid 8 -hydroxylase 1-like; GO:0005506,abscisic acid 8 -hydroxylase 1-like
Zoff260851	115	0	11	0	0	3	0	1	0	0	0	0	5.66	0	0.54	0	0	0.15	0	0.05	0	0	0	0	2.06667	0.05	0.0166667	0.001	-5.36923	0.046277	-4.05889	1	-5.64386	1	-6.9542	0.165297	gi|576995267|gb|EUC67666.1|	cytochrome P450 family protein [Rhizoctonia solani AG-3 Rhs1AP]	lbc:LACBIDRAFT_311267	potential P450 cytochrome	Hs13787189	[Q] KOG0156 Cytochrome P450 CYP2 subfamily	sp|B8NHY4|ORDA_ASPFN	O-methylsterigmatocystin oxidoreductase OS=Aspergillus flavus (strain ATCC 200026 / FGSC A1120 / NRRL 3357 / JCM 12722 / SRRC 167) GN=ordA PE=2 SV=1	GO:0020037,cytochrome p450; GO:0016705,cytochrome p450; GO:0004497,cytochrome p450; GO:0005506,cytochrome p450; GO:0055114,cytochrome p450
Zoff261175	4	9	8	35	4	68	5	2	50	0	1	0	0.2	0.45	0.39	1.72	0.23	3.37	0.25	0.1	2.52	0	0.05	0	0.346667	1.77333	0.956667	0.0166667	2.35484	0.114298	-5.84298	0.120124	-6.73335	0.000574374	1.46447	1	gi|656906880|gb|KEF52621.1|	cytochrome P450, family 51 (sterol 14-demethylase) [Exophiala aquamarina CBS 119918]	nfi:NFIA_024690	14-alpha sterol demethylase Cyp51B; K05917 cytochrome P450, family 51 (sterol 14-demethylase) [EC:1.14.13.70]	SPAC13A11.02c	[Q] KOG0684 Cytochrome P450	sp|O14442|CP51_UNCNE	Eburicol 14-alpha-demethylase OS=Uncinula necator GN=CYP51 PE=2 SV=2	GO:0035690,14-alpha sterol demethylase cyp51b; GO:0008144,14-alpha sterol demethylase cyp51b; GO:0020037,14-alpha sterol demethylase cyp51b; GO:0016705,14-alpha sterol demethylase cyp51b; GO:0004497,14-alpha sterol demethylase cyp51b; GO:0005506,14-alpha sterol demethylase cyp51b; GO:0032259,14-alpha sterol demethylase cyp51bGO:0009055,14-alpha sterol demethylase cyp51bGO:0055114,14-alpha sterol …
Zoff262669	495.99	531.56	413	773.4	416.88	382.15	801	746.01	1860	18614.4	2622.65	10305.5	24.41	26.63	20.39	38.06	23.95	18.96	40.51	36.95	93.67	944.27	135.62	509.48	23.81	26.99	57.0433	529.79	0.180857	1	3.21529	0.039313	4.29492	1.2e-05	1.26049	0.905225	gi|695010775|ref|XP_009392073.1|	PREDICTED: cytochrome P450 71A1-like [Musa acuminata subsp. malaccensis]	vvi:100260935	hypothetical protein LOC100260935	At4g31500	[Q] KOG0156 Cytochrome P450 CYP2 subfamily	sp|P24465|C71A1_PERAE	Cytochrome P450 71A1 OS=Persea americana GN=CYP71A1 PE=1 SV=2	GO:0020037,cytochrome p450 71a1-like; GO:0016705,cytochrome p450 71a1-like; GO:0004497,cytochrome p450 71a1-like; GO:0005506,cytochrome p450 71a1-like; GO:0055114,cytochrome p450 71a1-like
Zoff262673	129.19	82.24	108.53	105.08	62.88	53.41	331.14	232.68	811.66	6968.46	794.26	3681.6	6.36	4.12	5.36	5.17	3.61	2.65	16.75	11.52	40.87	353.5	41.07	182.01	5.28	3.81	23.0467	192.193	-0.470747	1	3.05993	0.0707409	5.65662	7.55e-08	2.12595	0.234615	gi|695010775|ref|XP_009392073.1|	PREDICTED: cytochrome P450 71A1-like [Musa acuminata subsp. malaccensis]	pop:POPTR_550924	CYP83F3v1; cytochrome P450	At3g26310	[Q] KOG0156 Cytochrome P450 CYP2 subfamily	sp|Q9LIP5|C71BW_ARATH	Cytochrome P450 71B35 OS=Arabidopsis thaliana GN=CYP71B35 PE=2 SV=1	GO:0046872,cytochrome p450 71a1-like; GO:0016491,cytochrome p450 71a1-like
Zoff262684	30	38	24	22	21	24	422	41	85	641	110.93	657.65	1.48	1.9	1.18	1.08	1.21	1.19	21.34	2.03	4.28	32.52	5.74	32.51	1.52	1.16	9.21667	23.59	-0.389947	1	1.35586	1	4.34598	1.81e-05	2.60017	0.302782	gi|695058403|ref|XP_009417516.1|	PREDICTED: cytochrome P450 CYP73A100-like [Musa acuminata subsp. malaccensis]	pop:POPTR_584578	C4H3; trans-cinnamate 4-monooxygenase (EC:1.14.13.11); K00487 trans-cinnamate 4-monooxygenase [EC:1.14.13.11]	At2g30490	[Q] KOG0156 Cytochrome P450 CYP2 subfamily	sp|H2DH22|C7A10_PANGI	Cytochrome P450 CYP73A100 OS=Panax ginseng PE=2 SV=1	GO:0016023,cytochrome p450 cyp73a100-like; GO:0004497,cytochrome p450 cyp73a100-like; GO:0005506,cytochrome p450 cyp73a100-like; GO:0020037,cytochrome p450 cyp73a100-like; GO:0016705,cytochrome p450 cyp73a100-like; GO:0016020,cytochrome p450 cyp73a100-like; GO:0055114,cytochrome p450 cyp73a100-like
Zoff262685	65	111	68	46	39.04	88	2040.2	131	254	1129.79	470.37	2396.15	3.2	5.56	3.36	2.26	2.24	4.37	103.17	6.49	12.79	57.31	24.32	118.46	4.04	2.95667	40.8167	66.6967	-0.450384	1	0.708456	1	4.49557	2.41e-06	3.33673	0.165484	gi|695008971|ref|XP_009391094.1|	PREDICTED: cytochrome P450 CYP73A100-like [Musa acuminata subsp. malaccensis]	osa:4329329	Os02g0467600; K00487 trans-cinnamate 4-monooxygenase [EC:1.14.13.11]	At2g30490	[Q] KOG0156 Cytochrome P450 CYP2 subfamily	sp|H2DH22|C7A10_PANGI	Cytochrome P450 CYP73A100 OS=Panax ginseng PE=2 SV=1	GO:0016023,cytochrome p450 cyp73a100-like; GO:0004497,cytochrome p450 cyp73a100-like; GO:0005506,cytochrome p450 cyp73a100-like; GO:0020037,cytochrome p450 cyp73a100-like; GO:0016705,cytochrome p450 cyp73a100-like; GO:0016020,cytochrome p450 cyp73a100-like; GO:0055114,cytochrome p450 cyp73a100-like
Zoff262686	0	0	0	0	1.96	0	80.8	0	0	29.21	5.7	61.2	0	0	0	0	0.11	0	4.09	0	0	1.48	0.29	3.03	0.001	0.0366667	1.36333	1.6	5.1964	1	0.230934	1	5.44746	0.00167749	10.4129	0.302176	gi|695008971|ref|XP_009391094.1|	PREDICTED: cytochrome P450 CYP73A100-like [Musa acuminata subsp. malaccensis]	osa:4329329	Os02g0467600; K00487 trans-cinnamate 4-monooxygenase [EC:1.14.13.11]	At2g30490	[Q] KOG0156 Cytochrome P450 CYP2 subfamily	sp|H2DH22|C7A10_PANGI	Cytochrome P450 CYP73A100 OS=Panax ginseng PE=2 SV=1	GO:0016023,cytochrome p450 cyp73a100-like; GO:0004497,cytochrome p450 cyp73a100-like; GO:0005506,cytochrome p450 cyp73a100-like; GO:0020037,cytochrome p450 cyp73a100-like; GO:0016705,cytochrome p450 cyp73a100-like; GO:0016020,cytochrome p450 cyp73a100-like; GO:0055114,cytochrome p450 cyp73a100-like
Zoff262690	18.7	40.27	31.97	18	10	35.94	671.49	39	83.49	454	125.92	725.46	0.92	2.02	1.58	0.89	0.57	1.78	33.96	1.93	4.2	23.03	6.51	35.87	1.50667	1.08	13.3633	21.8033	-0.480329	1	0.706269	1	4.33545	4.43e-05	3.14885	0.244422	gi|695058403|ref|XP_009417516.1|	PREDICTED: cytochrome P450 CYP73A100-like [Musa acuminata subsp. malaccensis]	osa:4329324	Os02g0467000; K00487 trans-cinnamate 4-monooxygenase [EC:1.14.13.11]	At2g30490	[Q] KOG0156 Cytochrome P450 CYP2 subfamily	sp|H2DH22|C7A10_PANGI	Cytochrome P450 CYP73A100 OS=Panax ginseng PE=2 SV=1	GO:0016023,trans-cinnamate 4-monooxygenase-like; GO:0004497,trans-cinnamate 4-monooxygenase-like; GO:0005506,trans-cinnamate 4-monooxygenase-like; GO:0020037,trans-cinnamate 4-monooxygenase-like; GO:0016705,trans-cinnamate 4-monooxygenase-like; GO:0055114,trans-cinnamate 4-monooxygenase-like
Zoff262691	174.3	350.73	222.03	108	99	237.06	5666.51	271	667.51	4717	1278.08	6980.54	8.58	17.57	10.96	5.32	5.69	11.76	286.55	13.42	33.62	239.28	66.09	345.1	12.37	7.59	111.197	216.823	-0.704674	0.996416	0.963406	1	4.83628	4.01e-07	3.1682	0.218761	gi|570932606|gb|AHF20176.1|	cinnamate 4-hydroxylase, partial [Musa acuminata AAA Group]	sbi:SORBI_04g017460	hypothetical protein; K00487 trans-cinnamate 4-monooxygenase [EC:1.14.13.11]	At2g30490	[Q] KOG0156 Cytochrome P450 CYP2 subfamily	sp|H2DH22|C7A10_PANGI	Cytochrome P450 CYP73A100 OS=Panax ginseng PE=2 SV=1	GO:0016023,cytochrome p450 cyp73a100-like; GO:0004497,cytochrome p450 cyp73a100-like; GO:0005506,cytochrome p450 cyp73a100-like; GO:0020037,cytochrome p450 cyp73a100-like; GO:0016705,cytochrome p450 cyp73a100-like; GO:0055114,cytochrome p450 cyp73a100-like
Zoff262872	9	2	3	15	15	340	7	2	17	1	1	0	0.44	0.1	0.15	0.74	0.86	16.87	0.35	0.1	0.86	0.05	0.05	0	0.23	6.15667	0.436667	0.0333333	4.74244	0.00542571	-3.71149	0.470872	-7.52904	0.000274989	0.924899	1	gi|656917304|gb|KEF62882.1|	hypothetical protein A1O9_00856 [Exophiala aquamarina CBS 119918]	pcs:Pc22g19240	Pc22g19240	At4g00360	[QI] KOG0157 Cytochrome P450 CYP4/CYP19/CYP26 subfamilies	sp|Q9Y758|CP52M_DEBHN	Cytochrome P450 52A13 OS=Debaryomyces hansenii GN=CYP52A13 PE=2 SV=1	GO:0020037,cytochrome p450 52a12; GO:0016712,cytochrome p450 52a12; GO:0005506,cytochrome p450 52a12; GO:0055114,cytochrome p450 52a12
Zoff263285	1777.56	4498.44	2221	7706.67	4108.61	3443.11	2139.01	2175	5419.38	530.44	500.84	366	87.48	225.39	109.63	379.3	235.99	170.84	108.17	107.72	272.92	26.91	25.9	18.09	140.833	262.043	162.937	23.6333	0.895817	0.633032	-2.78542	0.0325209	-3.47091	2.23e-06	0.210322	1	gi|313760499|dbj|BAJ41268.1|	NADPH-P450 reductase 1 [Zingiber officinale]	osa:4347838	Os09g0558900; K00327 NADPH-ferrihemoprotein reductase [EC:1.6.2.4]	At4g24520	[C] KOG1158 NADP/FAD dependent oxidoreductase	sp|Q05001|NCPR_CATRO	NADPH--cytochrome P450 reductase OS=Catharanthus roseus GN=CPR PE=2 SV=1	GO:0005789,nadph--cytochrome p450 reductase-like; GO:0003958,nadph--cytochrome p450 reductase-like; GO:0005506,nadph--cytochrome p450 reductase-like; GO:0010181,nadph--cytochrome p450 reductase-like; GO:0055114,nadph--cytochrome p450 reductase-like
Zoff263364	15	19	7	37	7	400	2	3	66	2	3	0	0.74	0.95	0.35	1.82	0.4	19.85	0.1	0.15	3.32	0.1	0.16	0	0.68	7.35667	1.19	0.0866667	3.43545	0.0487019	-3.77934	0.364603	-6.40743	0.00116024	0.807355	1	gi|656916329|gb|KEF61908.1|	hypothetical protein A1O9_03480 [Exophiala aquamarina CBS 119918]	ure:UREG_01634	similar to n-alkane-inducible cytochrome P-450	At4g00360	[QI] KOG0157 Cytochrome P450 CYP4/CYP19/CYP26 subfamilies	sp|Q9Y757|CP52L_DEBHN	Cytochrome P450 52A12 OS=Debaryomyces hansenii GN=CYP52A12 PE=2 SV=2	GO:0020037,cytochrome p450 alkane hydroxylase; GO:0016712,cytochrome p450 alkane hydroxylase; GO:0005506,cytochrome p450 alkane hydroxylase; GO:0055114,cytochrome p450 alkane hydroxylase
Zoff269537	44	62	16	76	93	19	120	10	267	0	3	2	2.17	3.11	0.79	3.74	5.34	0.94	6.07	0.5	13.45	0	0.16	0.1	2.02333	3.34	6.67333	0.0866667	0.723114	1	-6.26679	0.00899051	-5.26823	9.33e-05	1.72167	1	gi|695021619|ref|XP_009397903.1|	PREDICTED: cytochrome P450 86B1-like [Musa acuminata subsp. malaccensis]	osa:4331568	Os03g0140100	At4g39490	[QI] KOG0157 Cytochrome P450 CYP4/CYP19/CYP26 subfamilies	sp|Q9FMY1|C86B1_ARATH	Cytochrome P450 86B1 OS=Arabidopsis thaliana GN=CYP86B1 PE=2 SV=1	GO:0005488,cytochrome p450 86b1-like; GO:0016491,cytochrome p450 86b1-like; GO:0016023,cytochrome p450 86b1-like
Zoff269538	1818	4722	2052	613	874	614	3507	1576	2310	39	171	73	89.47	236.59	101.29	30.17	50.2	30.47	177.35	78.05	116.33	1.98	8.84	3.61	142.45	36.9467	123.91	4.81	-1.94694	0.00515602	-4.68711	0.000497411	-2.94134	0.0019688	-0.201163	1	gi|695021619|ref|XP_009397903.1|	PREDICTED: cytochrome P450 86B1-like [Musa acuminata subsp. malaccensis]	osa:4331568	Os03g0140100	At2g23180	[QI] KOG0157 Cytochrome P450 CYP4/CYP19/CYP26 subfamilies	sp|Q9FMY1|C86B1_ARATH	Cytochrome P450 86B1 OS=Arabidopsis thaliana GN=CYP86B1 PE=2 SV=1	GO:0005488,cytochrome p450 86b1-like; GO:0016491,cytochrome p450 86b1-like; GO:0016023,cytochrome p450 86b1-like
Zoff270677	0	1	0	41	12	31	0	3	54	4	5	13	0	0.05	0	2.02	0.69	1.54	0	0.15	2.72	0.2	0.26	0.64	0.0166667	1.41667	0.956667	0.366667	6.40939	1.31e-06	-1.38355	1	-1.94996	0.215334	5.84298	0.364086	gi|660966597|gb|KEP51051.1|	putative cytochrome P450 family:NADPH-P450 family reductase [Rhizoctonia solani 123E]	fgr:FG01972.1	C505_FUSOX Bifunctional P-450:NADPH-P450 reductase (Fatty acid omega-hydroxylase) (P450foxy); K14338 cytochrome P450 / NADPH-cytochrome P450 reductase [EC:1.14.14.1 1.6.2.4]	7297099	[C] KOG1158 NADP/FAD dependent oxidoreductase	sp|Q9Y8G7|C505_FUSOX	Bifunctional P-450:NADPH-P450 reductase OS=Fusarium oxysporum GN=CYP505 PE=1 SV=1	GO:0003958,cytochrome p450 family:nadph-p450 family reductase; GO:0005506,cytochrome p450 family:nadph-p450 family reductase; GO:0010181,cytochrome p450 family:nadph-p450 family reductase; GO:0020037,cytochrome p450 family:nadph-p450 family reductase; GO:0008270,cytochrome p450 family:nadph-p450 family reductase; GO:0070330,cytochrome p450 family:nadph-p450 family reductase; GO:0055114,cytochrome…
Zoff272248	4416.79	196	2658.34	302	180	621	5240.47	625.48	1805.36	9318.39	1728.02	3226.27	217.36	9.82	131.22	14.86	10.34	30.81	265.01	30.98	90.92	472.7	89.36	159.5	119.467	18.67	128.97	240.52	-2.67781	0.0394523	0.899121	1	3.68736	0.000278957	0.110427	1	gi|403399730|sp|E3W9C4.1|C71A1_ZINZE	RecName: Full=Alpha-humulene 10-hydroxylase [Zingiber zerumbet]	rcu:RCOM_0520560	cytochrome P450, putative (EC:1.14.13.68)	At5g25120	[Q] KOG0156 Cytochrome P450 CYP2 subfamily	sp|E3W9C4|C71A1_ZINZE	Alpha-humulene 10-hydroxylase OS=Zingiber zerumbet GN=CYP71BA1 PE=1 SV=1	GO:0016491,premnaspirodiene oxygenase-like; GO:0005488,premnaspirodiene oxygenase-like
Zoff272253	45.03	3	24.92	4	4	11.31	55.54	1	18.99	218.51	31.01	58.07	2.22	0.15	1.23	0.2	0.23	0.56	2.81	0.05	0.96	11.08	1.6	2.87	1.2	0.33	1.27333	5.18333	-1.8625	0.443201	2.02527	0.958144	3.97334	0.00159897	0.0855757	1	gi|403399730|sp|E3W9C4.1|C71A1_ZINZE	RecName: Full=Alpha-humulene 10-hydroxylase [Zingiber zerumbet]	osa:4342734	Os07g0218700	At3g26210	[Q] KOG0156 Cytochrome P450 CYP2 subfamily	sp|E3W9C4|C71A1_ZINZE	Alpha-humulene 10-hydroxylase OS=Zingiber zerumbet GN=CYP71BA1 PE=1 SV=1	GO:0020037,cytochrome p450; GO:0016705,cytochrome p450; GO:0004497,cytochrome p450; GO:0005506,cytochrome p450; GO:0055114,cytochrome p450
Zoff272254	34.42	3.51	16.29	3.12	7.84	5.97	39.25	8	10.17	127.72	18.15	43.13	1.69	0.18	0.8	0.15	0.45	0.3	1.98	0.4	0.51	6.48	0.94	2.13	0.89	0.3	0.963333	3.18333	-1.56884	0.642295	1.72443	0.943366	3.4075	0.0085995	0.11423	1	gi|403399730|sp|E3W9C4.1|C71A1_ZINZE	RecName: Full=Alpha-humulene 10-hydroxylase [Zingiber zerumbet]	osa:4348722	Os10g0440000	At4g13770	[Q] KOG0156 Cytochrome P450 CYP2 subfamily	sp|E3W9C4|C71A1_ZINZE	Alpha-humulene 10-hydroxylase OS=Zingiber zerumbet GN=CYP71BA1 PE=1 SV=1	GO:0016023,premnaspirodiene oxygenase-like; GO:0004497,premnaspirodiene oxygenase-like; GO:0005506,premnaspirodiene oxygenase-like; GO:0020037,premnaspirodiene oxygenase-like; GO:0016705,premnaspirodiene oxygenase-like; GO:0055114,premnaspirodiene oxygenase-like
Zoff272255	59.8	10	58.25	7.01	8	8.11	70.48	3	20.09	177.29	16.35	23.03	2.94	0.5	2.88	0.35	0.46	0.4	3.56	0.15	1.01	8.99	0.85	1.14	2.10667	0.403333	1.57333	3.66	-2.38492	0.0346514	1.21802	1	3.1818	0.0333973	-0.421138	1	gi|403399730|sp|E3W9C4.1|C71A1_ZINZE	RecName: Full=Alpha-humulene 10-hydroxylase [Zingiber zerumbet]	osa:4333363	Os03g0593600	At3g26230	[Q] KOG0156 Cytochrome P450 CYP2 subfamily	sp|E3W9C4|C71A1_ZINZE	Alpha-humulene 10-hydroxylase OS=Zingiber zerumbet GN=CYP71BA1 PE=1 SV=1	GO:0016023,premnaspirodiene oxygenase-like; GO:0004497,premnaspirodiene oxygenase-like; GO:0005506,premnaspirodiene oxygenase-like; GO:0020037,premnaspirodiene oxygenase-like; GO:0016705,premnaspirodiene oxygenase-like; GO:0055114,premnaspirodiene oxygenase-like
Zoff272264	637.76	47.14	374.72	46.29	29.83	103.8	774.44	104.23	285.43	1904.45	272.88	703.83	31.38	2.36	18.5	2.28	1.71	5.15	39.16	5.16	14.37	96.61	14.11	34.8	17.4133	3.04667	19.5633	48.5067	-2.51489	0.0452662	1.31003	1	3.99288	0.000277523	0.16796	1	gi|403399730|sp|E3W9C4.1|C71A1_ZINZE	RecName: Full=Alpha-humulene 10-hydroxylase [Zingiber zerumbet]	sbi:SORBI_01g015340	hypothetical protein	At3g26830	[Q] KOG0156 Cytochrome P450 CYP2 subfamily	sp|E3W9C4|C71A1_ZINZE	Alpha-humulene 10-hydroxylase OS=Zingiber zerumbet GN=CYP71BA1 PE=1 SV=1	GO:0016023,premnaspirodiene oxygenase-like; GO:0004497,premnaspirodiene oxygenase-like; GO:0005506,premnaspirodiene oxygenase-like; GO:0020037,premnaspirodiene oxygenase-like; GO:0016705,premnaspirodiene oxygenase-like; GO:0055114,premnaspirodiene oxygenase-like
Zoff282434	0	0	0	166	39	75	0	1	28	5	0	2	0	0	0	8.17	2.24	3.72	0	0.05	1.41	0.25	0	0.1	0.001	4.71	0.486667	0.116667	12.2015	5.94e-12	-2.06054	1	-5.33526	2.04e-05	8.92679	0.544798	gi|660963519|gb|KEP48876.1|	lanosterol 14-alpha-demethylase [Rhizoctonia solani 123E]	cci:CC1G_08364	lanosterol 14-alpha-demethylase	SPAC13A11.02c	[Q] KOG0684 Cytochrome P450	sp|P49602|CP51_USTMA	Lanosterol 14-alpha demethylase OS=Ustilago maydis (strain 521 / FGSC 9021) GN=ERG11 PE=3 SV=1	GO:0020037,lanosterol 14-alpha-demethylase; GO:0016705,lanosterol 14-alpha-demethylase; GO:0004497,lanosterol 14-alpha-demethylase; GO:0005506,lanosterol 14-alpha-demethylase; GO:0032259,lanosterol 14-alpha-demethylase; GO:0055114,lanosterol 14-alpha-demethylase; GO:0008168,lanosterol 14-alpha-demethylase
Zoff283768	245	154	202	235	249	165	2560	2813	8631	30616	16791	20524	12.06	7.72	9.97	11.57	14.3	8.19	129.46	139.32	434.65	1553.09	868.31	1014.67	9.91667	11.3533	234.477	1145.36	0.195189	1	2.28828	0.124649	6.65654	2.07e-18	4.56345	5.51e-06	gi|313150272|dbj|BAJ39894.1|	P450 mono-oxygenase [Zingiber zerumbet]	osa:4328532	Os02g0185200	At2g45560	[Q] KOG0156 Cytochrome P450 CYP2 subfamily	sp|E3W9C4|C71A1_ZINZE	Alpha-humulene 10-hydroxylase OS=Zingiber zerumbet GN=CYP71BA1 PE=1 SV=1	GO:0016023,premnaspirodiene oxygenase-like; GO:0004497,premnaspirodiene oxygenase-like; GO:0005506,premnaspirodiene oxygenase-like; GO:0020037,premnaspirodiene oxygenase-like; GO:0016705,premnaspirodiene oxygenase-like; GO:0016021,premnaspirodiene oxygenase-like; GO:0055114,premnaspirodiene oxygenase-like
Zoff283769	10609	10604	12696	7625	4450	4516	15538	6361	15024	23270	14580	16861	522.08	531.31	626.7	375.28	255.6	224.07	785.74	315.04	756.6	1180.44	753.97	833.57	560.03	284.983	619.127	922.66	-0.974627	0.187841	0.575565	1	1.69492	0.0337559	0.14473	1	gi|313150272|dbj|BAJ39894.1|	P450 mono-oxygenase [Zingiber zerumbet]	rcu:RCOM_1574340	cytochrome P450, putative (EC:1.14.13.68)	At3g26300	[Q] KOG0156 Cytochrome P450 CYP2 subfamily	sp|A6YIH8|C7D55_HYOMU	Premnaspirodiene oxygenase OS=Hyoscyamus muticus GN=CYP71D55 PE=1 SV=1	GO:0016020,premnaspirodiene oxygenase-like; GO:0046872,premnaspirodiene oxygenase-like; GO:0016491,premnaspirodiene oxygenase-like
Zoff290494	266	383	223	740	591	960	530	383	298	101	417	211	13.09	19.19	11.01	36.42	33.95	47.63	26.8	18.97	15.01	5.12	21.56	10.43	14.43	39.3333	20.26	12.37	1.44668	0.0204732	-0.711789	1	-1.66891	0.146445	0.489563	1	gi|695004257|ref|XP_009388531.1|	PREDICTED: cytochrome P450 734A6-like [Musa acuminata subsp. malaccensis]	zma:100382270	hypothetical protein LOC100382270	At2g26710	[QI] KOG0157 Cytochrome P450 CYP4/CYP19/CYP26 subfamilies	sp|B9X287|C7346_ORYSJ	Cytochrome P450 734A6 OS=Oryza sativa subsp. japonica GN=CYP734A6 PE=2 SV=1	GO:0010268,cytochrome p450 734a6-like; GO:0016131,cytochrome p450 734a6-like; GO:0004497,cytochrome p450 734a6-like; GO:0005506,cytochrome p450 734a6-like; GO:0020037,cytochrome p450 734a6-like; GO:0016705,cytochrome p450 734a6-like; GO:0016021,cytochrome p450 734a6-likeGO:0040008,cytochrome p450 734a6-likeGO:0055114,cytochrome p450 734a6-like
Zoff294948	16482	28759	33969	4443	4720	3505	4895	5181	3697	3532	4367	2480	811.1	1440.96	1676.77	218.67	271.11	173.91	247.54	256.6	186.18	179.17	225.83	122.61	1309.61	221.23	230.107	175.87	-2.56552	1.14e-06	-0.387793	1	-0.331038	1	-2.50876	0.0152663	gi|695027919|ref|XP_009401319.1|	PREDICTED: cytochrome P450 71A1-like [Musa acuminata subsp. malaccensis]	osa:4347176	Os09g0441400	At5g07990	[Q] KOG0156 Cytochrome P450 CYP2 subfamily	sp|Q9SD85|F3PH_ARATH	Flavonoid 3'-monooxygenase OS=Arabidopsis thaliana GN=CYP75B1 PE=1 SV=1	GO:0020037,cytochrome p450 71a1-like; GO:0016705,cytochrome p450 71a1-like; GO:0004497,cytochrome p450 71a1-like; GO:0005506,cytochrome p450 71a1-like; GO:0055114,cytochrome p450 71a1-like
Zoff297089	899	839	1459	2426	2760	3527	338	632	690	790	1517	579	44.24	42.04	72.02	119.4	158.53	175	17.09	31.3	34.75	40.08	78.45	28.62	52.7667	150.977	27.7133	49.05	1.51663	0.00992987	0.823673	1	-1.622	0.0902129	-0.929047	1	gi|672170598|ref|XP_008805359.1|	PREDICTED: cytochrome P450 734A6-like [Phoenix dactylifera]	osa:4344024	Os07g0635500	At2g46950	[QI] KOG0157 Cytochrome P450 CYP4/CYP19/CYP26 subfamilies	sp|B9X287|C7346_ORYSJ	Cytochrome P450 734A6 OS=Oryza sativa subsp. japonica GN=CYP734A6 PE=2 SV=1	GO:0046872,cytochrome p450 734a6-like; GO:0016491,cytochrome p450 734a6-like
Zoff298195	112.82	16.51	58.71	40.16	13.46	36.9	257.78	145.96	175.14	577.56	332.72	358.33	5.55	0.83	2.9	1.98	0.77	1.83	13.04	7.23	8.82	29.3	17.21	17.72	3.09333	1.52667	9.69667	21.41	-1.01878	0.934968	1.14272	1	3.80983	5.97e-06	1.64833	0.820412	gi|695059365|ref|XP_009418039.1|	PREDICTED: cytochrome P450 71A9-like [Musa acuminata subsp. malaccensis]	rcu:RCOM_0794410	cytochrome P450, putative (EC:1.14.13.68)	At5g42590	[Q] KOG0156 Cytochrome P450 CYP2 subfamily	sp|O81970|C71A9_SOYBN	Cytochrome P450 71A9 OS=Glycine max GN=CYP71A9 PE=2 SV=1	GO:0016020,cytochrome p450 71a9-like; GO:0046872,cytochrome p450 71a9-like; GO:0016491,cytochrome p450 71a9-like
Zoff300319	154.42	78.95	169.44	376.66	332.56	445.34	193.24	155.25	162.15	208.09	277.49	151.07	7.6	3.96	8.36	18.54	19.1	22.1	9.77	7.69	8.17	10.56	14.35	7.47	6.64	19.9133	8.54333	10.7933	1.58448	0.0152569	0.33727	1	-0.883594	0.743337	0.363616	1	gi|695013365|ref|XP_009393464.1|	PREDICTED: cytochrome P450 71A1-like [Musa acuminata subsp. malaccensis]	pop:POPTR_806504	hypothetical protein	At4g13310	[Q] KOG0156 Cytochrome P450 CYP2 subfamily	sp|P24465|C71A1_PERAE	Cytochrome P450 71A1 OS=Persea americana GN=CYP71A1 PE=1 SV=2	GO:0046872,cytochrome p450 71a1-like; GO:0016491,cytochrome p450 71a1-like
Zoff300334	154.51	94.9	137.78	322.11	269.3	360.29	172.15	180.59	125.44	171.92	267.2	123.77	7.6	4.75	6.8	15.85	15.47	17.88	8.71	8.94	6.32	8.72	13.82	6.12	6.38333	16.4	7.99	9.55333	1.36131	0.0301069	0.257809	1	-0.77962	0.937581	0.323886	1	gi|695013365|ref|XP_009393464.1|	PREDICTED: cytochrome P450 71A1-like [Musa acuminata subsp. malaccensis]	osa:4338845	Os05g0424300	At2g30770	[Q] KOG0156 Cytochrome P450 CYP2 subfamily	sp|Q43257|C71C4_MAIZE	indole-2-monooxygenase OS=Zea mays GN=CYP71C4 PE=1 SV=1	--
Zoff300346	53.75	194.73	90.5	83.16	105.45	197.06	59.86	108.12	120.47	2.44	3.03	1.13	2.65	9.76	4.47	4.09	6.06	9.78	3.03	5.35	6.07	0.12	0.16	0.06	5.62667	6.64333	4.81667	0.113333	0.239627	1	-5.40939	0.000413159	-5.87326	2.72e-08	-0.224245	1	gi|695048782|ref|XP_009412306.1|	PREDICTED: allene oxide synthase 2-like [Musa acuminata subsp. malaccensis]	sbi:SORBI_01g042270	hypothetical protein	7303501	[Q] KOG0158 Cytochrome P450 CYP3/CYP5/CYP6/CYP9 subfamilies	sp|Q96242|CP74A_ARATH	Allene oxide synthase, chloroplastic OS=Arabidopsis thaliana GN=CYP74A PE=1 SV=3	GO:0009108,allene oxide synthase; GO:0008652,allene oxide synthase; GO:0009695,allene oxide synthase; GO:0009697,allene oxide synthase; GO:0016705,allene oxide synthase; GO:0005506,allene oxide synthase; GO:0010363,allene oxide synthaseGO:0019761,allene oxide synthaseGO:0010200,allene oxide synthaseGO:0009684,allene oxide synthaseGO:0047987,allene oxide synthaseGO:0031348,allene oxide synthaseGO:…
Zoff300469	1751	801	979	343	271	457	1291	536	735	3053	906	2649	86.17	40.13	48.33	16.88	15.57	22.68	65.28	26.55	37.01	154.87	46.85	130.96	58.21	18.3767	42.9467	110.893	-1.66339	0.00974854	1.36855	0.83469	2.59323	0.00224135	-0.438721	1	gi|694999984|ref|XP_009409655.1|	PREDICTED: cytochrome P450 71A1-like [Musa acuminata subsp. malaccensis]	vvi:100253593	hypothetical protein LOC100253593	At4g13310	[Q] KOG0156 Cytochrome P450 CYP2 subfamily	sp|P24465|C71A1_PERAE	Cytochrome P450 71A1 OS=Persea americana GN=CYP71A1 PE=1 SV=2	GO:0005488,cytochrome p450 71a1-like; GO:0016491,cytochrome p450 71a1-like; GO:0043231,cytochrome p450 71a1-like; GO:0016020,cytochrome p450 71a1-like
Zoff300470	117	434	74	97	62	110	57	134	21	3	2	8	5.76	21.75	3.65	4.77	3.56	5.46	2.88	6.64	1.06	0.15	0.1	0.4	10.3867	4.59667	3.52667	0.216667	-1.17607	0.64947	-4.02476	0.0334918	-4.40704	8.54e-06	-1.55836	1	gi|694999984|ref|XP_009409655.1|	PREDICTED: cytochrome P450 71A1-like [Musa acuminata subsp. malaccensis]	sbi:SORBI_03g001060	hypothetical protein	At5g25120	[Q] KOG0156 Cytochrome P450 CYP2 subfamily	sp|O81974|C71D8_SOYBN	Cytochrome P450 71D8 OS=Glycine max GN=CYP71D8 PE=2 SV=1	GO:0046872,cytochrome p450 71a1-like; GO:0016491,cytochrome p450 71a1-like
Zoff304813	82	0	46.42	0	0	0	0	0	0	0	0	0	4.04	0	2.29	0	0	0	0	0	0	0	0	0	2.11	0.001	0.001	0.001	-11.043	0.000784663	0	1	0	1	-11.043	0.0467906	gi|471881746|emb|CCO34427.1|	NADPH-ferrihemoprotein reductase [Rhizoctonia solani AG-1 IB]	cci:CC1G_15012	cytochrome P450 oxidoreductase; K00327 NADPH-ferrihemoprotein reductase [EC:1.6.2.4]	7297099	[C] KOG1158 NADP/FAD dependent oxidoreductase	sp|Q9HDG2|NCPR_PHACH	NADPH--cytochrome P450 reductase OS=Phanerochaete chrysosporium GN=CPR PE=2 SV=1	GO:0003958,cytochrome p450 oxidoreductase; GO:0005506,cytochrome p450 oxidoreductase; GO:0010181,cytochrome p450 oxidoreductase; GO:0055085,cytochrome p450 oxidoreductase; GO:0016021,cytochrome p450 oxidoreductase; GO:0055114,cytochrome p450 oxidoreductase
Zoff304816	1	1	0	293	45	80	0	2	12	8	4	10	0.05	0.05	0	14.42	2.58	3.97	0	0.1	0.6	0.41	0.21	0.49	0.0333333	6.99	0.233333	0.37	7.71218	8.81e-10	0.665133	1	-4.2397	0.000286215	2.80735	1	gi|471881746|emb|CCO34427.1|	NADPH-ferrihemoprotein reductase [Rhizoctonia solani AG-1 IB]	cci:CC1G_15012	cytochrome P450 oxidoreductase; K00327 NADPH-ferrihemoprotein reductase [EC:1.6.2.4]	7297099	[C] KOG1158 NADP/FAD dependent oxidoreductase	sp|Q9HDG2|NCPR_PHACH	NADPH--cytochrome P450 reductase OS=Phanerochaete chrysosporium GN=CPR PE=2 SV=1	GO:0003958,cytochrome p450 oxidoreductase; GO:0005506,cytochrome p450 oxidoreductase; GO:0010181,cytochrome p450 oxidoreductase; GO:0055085,cytochrome p450 oxidoreductase; GO:0016021,cytochrome p450 oxidoreductase; GO:0055114,cytochrome p450 oxidoreductase
Zoff305284	15.7	7.16	2.69	7.11	6.37	0	11.32	5.61	31.41	53.59	42.55	45.64	0.77	0.36	0.13	0.35	0.37	0	0.57	0.28	1.58	2.72	2.2	2.26	0.42	0.24	0.81	2.39333	-0.807355	1	1.56303	0.883191	3.31792	0.00449964	0.947533	1	gi|703114726|ref|XP_010100729.1|	Flavonoid 3'-monooxygenase [Morus notabilis]	zma:100282873	pco115177; LOC100282873	At1g01280	[Q] KOG0156 Cytochrome P450 CYP2 subfamily	sp|Q9LNJ4|C70A2_ARATH	Cytochrome P450 703A2 OS=Arabidopsis thaliana GN=CYP703A2 PE=2 SV=1	GO:0046872,cytochrome p450 703a2; GO:0051791,cytochrome p450 703a2; GO:0044249,cytochrome p450 703a2; GO:0010584,cytochrome p450 703a2; GO:0016709,cytochrome p450 703a2
Zoff310987	125	272	194	184	297	992	103	166	356	124	82	119	6.15	13.63	9.58	9.06	17.06	49.22	5.21	8.22	17.93	6.29	4.24	5.88	9.78667	25.1133	10.4533	5.47	1.35956	0.374634	-0.93435	1	-2.19884	0.0470168	0.0950736	1	gi|695024614|ref|XP_009399529.1|	PREDICTED: cytochrome P450 724B1-like [Musa acuminata subsp. malaccensis]	osa:4336116	Os04g0469800; K12639 cytochrome P450, family 724, subfamily B, polypeptide 1 [EC:1.14.13.-]	At3g50660	[QI] KOG0157 Cytochrome P450 CYP4/CYP19/CYP26 subfamilies	sp|Q6F4F5|C724B_ORYSJ	Cytochrome P450 724B1 OS=Oryza sativa subsp. japonica GN=CYP724B1 PE=1 SV=1	GO:0016132,cytochrome p450 724b1-like; GO:0008199,cytochrome p450 724b1-like; GO:0010012,cytochrome p450 724b1-like; GO:0016021,cytochrome p450 724b1-like; GO:0055114,cytochrome p450 724b1-like; GO:0009647,cytochrome p450 724b1-like; GO:0016705,cytochrome p450 724b1-likeGO:0009055,cytochrome p450 724b1-likeGO:0006879,cytochrome p450 724b1-likeGO:0016023,cytochrome p450 724b1-likeGO:0006826,cytoch…
Zoff314296	90	50	113	59	47	55	132	118	136	310	193	187	4.43	2.51	5.58	2.9	2.7	2.73	6.68	5.84	6.85	15.73	9.98	9.24	4.17333	2.77667	6.45667	11.65	-0.587846	1	0.851469	1	2.0689	0.0130941	0.629589	1	gi|695026659|ref|XP_009400636.1|	PREDICTED: cytochrome P450 704C1-like, partial [Musa acuminata subsp. malaccensis]	osa:4349165	Os10g0525000	At2g44890	[QI] KOG0157 Cytochrome P450 CYP4/CYP19/CYP26 subfamilies	sp|Q50EK3|C04C1_PINTA	Cytochrome P450 704C1 OS=Pinus taeda GN=CYP704C1 PE=2 SV=1	GO:0020037,cytochrome p450 704c1-like; GO:0016705,cytochrome p450 704c1-like; GO:0022900,cytochrome p450 704c1-like; GO:0004497,cytochrome p450 704c1-like; GO:0005506,cytochrome p450 704c1-like
Zoff314297	494	290	471	255	282	299	731	549	546	1493	985	986	24.31	14.53	23.25	12.55	16.2	14.84	36.97	27.19	27.5	75.74	50.94	48.75	20.6967	14.53	30.5533	58.4767	-0.510364	1	0.936531	1	2.00883	0.00809592	0.561931	1	gi|695026659|ref|XP_009400636.1|	PREDICTED: cytochrome P450 704C1-like, partial [Musa acuminata subsp. malaccensis]	vvi:100265146	hypothetical protein LOC100265146	At2g45510	[QI] KOG0157 Cytochrome P450 CYP4/CYP19/CYP26 subfamilies	sp|Q50EK3|C04C1_PINTA	Cytochrome P450 704C1 OS=Pinus taeda GN=CYP704C1 PE=2 SV=1	GO:0020037,cytochrome p450 704c1-like; GO:0016705,cytochrome p450 704c1-like; GO:0004497,cytochrome p450 704c1-like; GO:0005506,cytochrome p450 704c1-like; GO:0055114,cytochrome p450 704c1-like
Zoff326109	130	2	49	18	13	10	102	94	168	1187.04	356	710	6.4	0.1	2.42	0.89	0.75	0.5	5.16	4.66	8.46	60.22	18.41	35.1	2.97333	0.713333	6.09333	37.91	-2.05943	0.397512	2.63727	0.0640965	5.73186	2.9e-10	1.03515	1	gi|695010775|ref|XP_009392073.1|	PREDICTED: cytochrome P450 71A1-like [Musa acuminata subsp. malaccensis]	vvi:100260935	hypothetical protein LOC100260935	At3g26210	[Q] KOG0156 Cytochrome P450 CYP2 subfamily	sp|P24465|C71A1_PERAE	Cytochrome P450 71A1 OS=Persea americana GN=CYP71A1 PE=1 SV=2	GO:0004497,cytochrome p450 71a1-like; GO:0005506,cytochrome p450 71a1-like; GO:0020037,cytochrome p450 71a1-like; GO:0031090,cytochrome p450 71a1-like; GO:0016705,cytochrome p450 71a1-like; GO:0005783,cytochrome p450 71a1-like; GO:0044425,cytochrome p450 71a1-likeGO:0055114,cytochrome p450 71a1-like
Zoff328070	26	1	7	1	6	5	14	14	36	161	37	77	1.28	0.05	0.35	0.05	0.34	0.25	0.71	0.69	1.81	8.17	1.91	3.81	0.56	0.213333	1.07	4.63	-1.39232	1	2.1134	0.379381	4.43983	0.000206027	0.934112	1	gi|695035176|ref|XP_009405039.1|	PREDICTED: cytochrome P450 71B10-like [Musa acuminata subsp. malaccensis]	vvi:100263449	hypothetical protein LOC100263449	At3g26300	[Q] KOG0156 Cytochrome P450 CYP2 subfamily	sp|H2DH20|C7D13_PANGI	Cytochrome P450 CYP71D313 OS=Panax ginseng PE=2 SV=1	GO:0020037,cytochrome p450 71d9-like; GO:0016705,cytochrome p450 71d9-like; GO:0004497,cytochrome p450 71d9-like; GO:0005506,cytochrome p450 71d9-like; GO:0055114,cytochrome p450 71d9-like
Zoff332762	0	0	0	2	7	14	0	0	0	0	1	0	0	0	0	0.1	0.4	0.69	0	0	0	0	0.05	0	0.001	0.396667	0.001	0.0166667	8.63178	0.0244611	4.05889	1	-4.57289	0.120719	0	1	gi|443914945|gb|ELU36619.1|	cytochrome P450 monooxygenase pc-bph [Rhizoctonia solani AG-1 IA]	cci:CC1G_11080	cytochrome P450 monooxygenase pc-bph; K07824 benzoate 4-monooxygenase [EC:1.14.13.12]	CE01657	[Q] KOG0158 Cytochrome P450 CYP3/CYP5/CYP6/CYP9 subfamilies	sp|P17549|CP53_ASPNG	Benzoate 4-monooxygenase OS=Aspergillus niger GN=bphA PE=1 SV=1	GO:0020037,cytochrome p450 monooxygenase pc-bph; GO:0016705,cytochrome p450 monooxygenase pc-bph; GO:0004497,cytochrome p450 monooxygenase pc-bph; GO:0005506,cytochrome p450 monooxygenase pc-bph; GO:0055114,cytochrome p450 monooxygenase pc-bph
Zoff338322	6	8	9	37	25	527	10	2	264	7	23	2	0.3	0.4	0.44	1.82	1.44	26.15	0.51	0.1	13.29	0.36	1.19	0.1	0.38	9.80333	4.63333	0.55	4.6892	0.000921253	-3.07455	0.634064	-4.15577	0.0207412	3.60798	0.435462	gi|630019730|ref|XP_007833515.1|	hypothetical protein PFICI_06743 [Pestalotiopsis fici W106-1]	afv:AFLA_004370	cytochrome P450 oxidoreductase, putative	Hs4503231	[Q] KOG0158 Cytochrome P450 CYP3/CYP5/CYP6/CYP9 subfamilies	sp|Q4WAW5|FTMC_ASPFU	Tryprostatin B 6-hydroxylase OS=Neosartorya fumigata (strain ATCC MYA-4609 / Af293 / CBS 101355 / FGSC A1100) GN=ftmP450-1 PE=3 SV=2	GO:0046872,cytochrome p450; GO:0008152,cytochrome p450; GO:0016491,cytochrome p450
Zoff513100	1	1	0	0	3	118	1	2	4	1	2	0	0.05	0.05	0	0	0.17	5.85	0.05	0.1	0.2	0.05	0.1	0	0.0333333	2.00667	0.116667	0.05	5.91169	0.0340268	-1.22239	1	-5.32673	0.0693402	1.80735	1	gi|628349094|ref|XP_007750064.1|	hypothetical protein A1O5_11302 [Cladophialophora psammophila CBS 110553]	nfi:NFIA_047320	Cytochrome P450 oxidoreductase, putative	At2g45560	[Q] KOG0156 Cytochrome P450 CYP2 subfamily	sp|Q9YH64|CP1A1_PLAFE	Cytochrome P450 1A1 OS=Platichthys flesus GN=cyp1a1 PE=3 SV=1	GO:0020037,cytochrome p450; GO:0016705,cytochrome p450; GO:0005506,cytochrome p450; GO:0055114,cytochrome p450
Zoff585604	5	4	0	4	3	161	0	2	1	1	1	2	0.25	0.2	0	0.2	0.17	7.99	0	0.1	0.05	0.05	0.05	0.1	0.15	2.78667	0.05	0.0666667	4.21551	0.0750699	0.415037	1	-5.38543	0.0153366	-1.58496	1	gi|628280797|ref|XP_007732099.1|	hypothetical protein A1O3_03774 [Capronia epimyces CBS 606.96]	ani:AN7969.2	hypothetical protein	CE13541	[Q] KOG0158 Cytochrome P450 CYP3/CYP5/CYP6/CYP9 subfamilies	sp|Q12645|PID9_FUSSO	Pisatin demethylase OS=Fusarium solani subsp. pisi GN=PDAT9 PE=3 SV=1	GO:0020037,cytochrome p450 oxidoreductase; GO:0016705,cytochrome p450 oxidoreductase; GO:0004497,cytochrome p450 oxidoreductase; GO:0005506,cytochrome p450 oxidoreductase; GO:0055114,cytochrome p450 oxidoreductase
Zoff604652	9	3	3	38	9	71	7	3	39	1	2	0	0.44	0.15	0.15	1.87	0.52	3.52	0.35	0.15	1.96	0.05	0.1	0	0.246667	1.97	0.82	0.05	2.99756	0.0129195	-4.03562	0.246562	-5.30012	0.000481697	1.73306	1	gi|656911297|gb|KEF56930.1|	cytochrome P450 oxidoreductase [Exophiala aquamarina CBS 119918]	aor:AOR_1_1172114	AO090701000658; cytochrome P450 monooxygenase	CE15823	[Q] KOG0158 Cytochrome P450 CYP3/CYP5/CYP6/CYP9 subfamilies	sp|Q12645|PID9_FUSSO	Pisatin demethylase OS=Fusarium solani subsp. pisi GN=PDAT9 PE=3 SV=1	GO:0020037,cytochrome p450 oxidoreductase; GO:0016705,cytochrome p450 oxidoreductase; GO:0004497,cytochrome p450 oxidoreductase; GO:0005506,cytochrome p450 oxidoreductase; GO:0055114,cytochrome p450 oxidoreductase
Zoff606655	0	0	0	0	0	0	0	0	0	41	0	4	0	0	0	0	0	0	0	0	0	2.08	0	0.2	0.001	0.001	0.001	0.76	0	1	9.56986	0.175012	9.56986	0.0489502	0	1	gi|576984058|gb|EUC56801.1|	cytochrome P450 family protein [Rhizoctonia solani AG-3 Rhs1AP]	ppl:POSPLDRAFT_20385	hypothetical protein	CE01658	[Q] KOG0158 Cytochrome P450 CYP3/CYP5/CYP6/CYP9 subfamilies	sp|Q27517|C13A3_CAEEL	Putative cytochrome P450 CYP13A3 OS=Caenorhabditis elegans GN=cyp-13A3 PE=3 SV=1	GO:0020037,cytochrome p450 family protein; GO:0016705,cytochrome p450 family protein; GO:0005506,cytochrome p450 family protein; GO:0055114,cytochrome p450 family protein
Zoff610568	252	283	168	875	736	649	354	540	258	12	446	78	12.4	14.18	8.29	43.07	42.28	32.2	17.9	26.74	12.99	0.61	23.06	3.86	11.6233	39.1833	19.21	9.17667	1.75322	0.00189456	-1.06582	1	-2.0942	0.325415	0.724834	1	gi|313150272|dbj|BAJ39894.1|	P450 mono-oxygenase [Zingiber zerumbet]	vvi:100263449	hypothetical protein LOC100263449	At3g26310	[Q] KOG0156 Cytochrome P450 CYP2 subfamily	sp|P93531|C71D7_SOLCH	Cytochrome P450 71D7 OS=Solanum chacoense GN=CYP71D7 PE=3 SV=1	GO:0016491,premnaspirodiene oxygenase-like; GO:0005488,premnaspirodiene oxygenase-like
Zoff612968	15.36	56.67	19	9	8	11	8	31	0	0	0	1	0.76	2.84	0.94	0.44	0.46	0.55	0.4	1.54	0	0	0	0.05	1.51333	0.483333	0.646667	0.0166667	-1.64664	0.256919	-5.27798	0.326111	-4.85798	0.0273512	-1.22664	1	gi|695072967|ref|XP_009383632.1|	PREDICTED: cytochrome P450 71A1-like [Musa acuminata subsp. malaccensis]	rcu:RCOM_1082470	cytochrome P450, putative (EC:1.14.13.68)	At2g30770	[Q] KOG0156 Cytochrome P450 CYP2 subfamily	sp|P24465|C71A1_PERAE	Cytochrome P450 71A1 OS=Persea americana GN=CYP71A1 PE=1 SV=2	GO:0016491,cytochrome p450 71a1-like; GO:0005488,cytochrome p450 71a1-like
Zoff000041	3	19	3	15	13	21	16	5	12	3	3	0	0.15	0.95	0.15	0.74	0.75	1.04	0.81	0.25	0.6	0.15	0.16	0	0.416667	0.843333	0.553333	0.103333	1.01721	1	-2.42084	0.76737	-3.0288	0.0494041	0.409255	1	gi|413943394|gb|AFW76043.1|	hypothetical protein ZEAMMB73_301405 [Zea mays]	zma:100273658	hypothetical protein LOC100273658	At5g12250	[Z] KOG1375 Beta tubulin	sp|P25862|TBB1_AVESA	Tubulin beta-1 chain (Fragment) OS=Avena sativa GN=TUBB1 PE=2 SV=1	GO:0005874,beta- partial; GO:0051258,beta- partial; GO:0006184,beta- partial; GO:0007017,beta- partial; GO:0003924,beta- partial; GO:0005200,beta- partial; GO:0005525,beta- partial
Zoff000289	5	6	7	1	2	1	12	5	12	78	35	52	0.25	0.3	0.35	0.05	0.11	0.05	0.61	0.25	0.6	3.96	1.81	2.57	0.3	0.07	0.486667	2.78	-2.09954	0.512965	2.51408	0.146621	5.31159	3.67e-06	0.697971	1	gi|695054942|ref|XP_009415619.1|	PREDICTED: acid phosphatase 1-like [Musa acuminata subsp. malaccensis]	ath:AT2G38600	acid phosphatase class B family protein	--	--	sp|P27061|PPA1_SOLLC	Acid phosphatase 1 OS=Solanum lycopersicum GN=APS1 PE=2 SV=1	GO:0016023,acid phosphatase 1-like; GO:0005739,acid phosphatase 1-like; GO:0003993,acid phosphatase 1-like
Zoff000384	0	2	0	2	2	36	1	0	9	0	0	0	0	0.1	0	0.1	0.11	1.79	0.05	0	0.45	0	0	0	0.0333333	0.666667	0.166667	0.001	4.32193	0.132692	-7.38082	1	-9.38082	0.0307746	2.32193	1	gi|656917367|gb|KEF62945.1|	hypothetical protein A1O9_00919 [Exophiala aquamarina CBS 119918]	--	--	--	--	--	--	--
Zoff000468	0	8	3	0	0	0	1460.03	2	6	0	0	0	0	0.4	0.15	0	0	0	73.83	0.1	0.3	0	0	0	0.183333	0.001	24.7433	0.001	-7.51833	0.464214	-14.5948	0.0117844	0	1	7.07643	0.166813	gi|302885390|ref|XP_003041587.1|	hypothetical protein NECHADRAFT_7634 [Nectria haematococca mpVI 77-13-4]	afm:AFUA_6G09540	endoglucanase (EC:3.2.1.-); K01238 [EC:3.2.1.-]	--	--	sp|Q2US83|EGLD_ASPOR	Probable endo-beta-1,4-glucanase D OS=Aspergillus oryzae (strain ATCC 42149 / RIB 40) GN=eglD PE=3 SV=1	GO:0016787,fungal cellulose binding domain protein
Zoff000971	0	0	0	20	4	3	0	0	1	4	0	0	0	0	0	0.98	0.23	0.15	0	0	0.05	0.2	0	0	0.001	0.453333	0.0166667	0.0666667	8.82443	0.0203036	2	1	-2.76553	0.526585	4.05889	1	gi|576986313|gb|EUC59049.1|	eukaryotic translation initiation factor 4E type 2 [Rhizoctonia solani AG-3 Rhs1AP]	ppl:POSPLDRAFT_134983	eukaryotic translation initiation factor 4E class II; K03259 translation initiation factor 4E	Hs4757702	[J] KOG1669 Predicted mRNA cap-binding protein related to eIF-4E	sp|O60573|IF4E2_HUMAN	Eukaryotic translation initiation factor 4E type 2 OS=Homo sapiens GN=EIF4E2 PE=1 SV=1	GO:0005737,eukaryotic translation initiation factor 4e class ii; GO:0006413,eukaryotic translation initiation factor 4e class ii; GO:0003743,eukaryotic translation initiation factor 4e class ii
Zoff000993	0	0	0	34	7	13	0	1	3	3	0	0	0	0	0	1.67	0.4	0.65	0	0.05	0.15	0.15	0	0	0.001	0.906667	0.0666667	0.05	9.82443	0.00011139	-0.415037	1	-4.18057	0.0242913	6.05889	1	gi|660966762|gb|KEP51180.1|	other/SCY1 kinase [Rhizoctonia solani 123E]	cci:CC1G_05159	other/SCY1 protein kinase	SPBP23A10.10	[T] KOG2137 Protein kinase	sp|Q6P3W7|SCYL2_HUMAN	SCY1-like protein 2 OS=Homo sapiens GN=SCYL2 PE=1 SV=1	GO:0004672,other scy1 protein kinase; GO:0006468,other scy1 protein kinase; GO:0005524,other scy1 protein kinase
Zoff001211	0	0	0	0	0	0	0	1	0	35	1	46	0	0	0	0	0	0	0	0.05	0	1.78	0.05	2.27	0.001	0.001	0.0166667	1.36667	0	1	6.35755	0.0489	10.4164	0.00163208	4.05889	1	gi|695450164|ref|XP_009535412.1|	hypothetical protein PHYSODRAFT_352694 [Phytophthora sojae]	pif:PITG_11975	hypothetical protein	--	--	--	--	--
Zoff001600	25	27	9	1	3	4	9	53	39	0	23	8	1.23	1.35	0.44	0.05	0.17	0.2	0.46	2.62	1.96	0	1.19	0.4	1.00667	0.14	1.68	0.53	-2.84609	0.0144047	-1.6644	1	1.92057	0.889532	0.738875	1	gi|695032833|ref|XP_009403974.1|	PREDICTED: uncharacterized protein LOC103987405 [Musa acuminata subsp. malaccensis]	vvi:100263470	hypothetical protein LOC100263470	--	--	--	--	--
Zoff001782	1	13	6	11	11	2	3	0	16	0	0	0	0.05	0.65	0.3	0.54	0.63	0.1	0.15	0	0.81	0	0	0	0.333333	0.423333	0.32	0.001	0.344828	1	-8.32193	0.517873	-8.72565	0.0310162	-0.0588937	1	gi|146419652|ref|XP_001485787.1|	conserved hypothetical protein [Meyerozyma guilliermondii ATCC 6260]	pgu:PGUG_01458	hypothetical protein	--	--	--	--	--
Zoff002204	0	0	0	0	0	0	0	0	0	4	0	67	0	0	0	0	0	0	0	0	0	0.2	0	3.31	0.001	0.001	0.001	1.17	0	1	10.1923	0.101779	10.1923	0.0222587	0	1	gi|675168301|ref|XP_008893035.1|	hypothetical protein PPTG_01473 [Phytophthora parasitica INRA-310]	phu:Phum_PHUM268310	pre-mRNA-splicing factor SLT11, putative; K12872 pre-mRNA-splicing factor RBM22/SLT11	Hs8922328	[R] KOG0153 Predicted RNA-binding protein (RRM superfamily)	sp|Q6NZZ9|RBM22_DANRE	Pre-mRNA-splicing factor RBM22 OS=Danio rerio GN=rbm22 PE=2 SV=1	GO:0003676,pre-mrna-splicing factor rbm22-like; GO:0046872,pre-mrna-splicing factor rbm22-like
Zoff002220	0	0	2	0	0	0	0	0	0	19	26	0	0	0	0.1	0	0	0	0	0	0	0.96	1.34	0	0.0333333	0.001	0.001	0.766667	-5.05889	1	9.58246	0.115467	9.58246	0.0218862	-5.05889	1	gi|591458828|gb|EXL90502.1|	hypothetical protein FOIG_16253 [Fusarium oxysporum f. sp. cubense tropical race 4 54006]	mgr:MGG_03036	MG03036.4; hypothetical protein	--	--	sp|P52577|IFRH_ARATH	Isoflavone reductase homolog P3 OS=Arabidopsis thaliana GN=At1g75280 PE=2 SV=1	--
Zoff002359	2	0	0	12	2	29.6	3	0	3	0	9	0	0.1	0	0	0.59	0.11	1.47	0.15	0	0.15	0	0.47	0	0.0333333	0.723333	0.1	0.156667	4.43962	0.0299651	0.647698	1	-2.20696	0.780736	1.58496	1	gi|50404046|gb|AAT76788.1|	40S ribosomal protein S9 [Corbicula fluminea]	afv:AFLA_101160	40S ribosomal protein S9; K02997 small subunit ribosomal protein S9e	CE05849	[J] KOG3301 Ribosomal protein S4	sp|Q20228|RS9_CAEEL	40S ribosomal protein S9 OS=Caenorhabditis elegans GN=rps-9 PE=3 SV=1	GO:0009792,40s ribosomal protein s9; GO:0010171,40s ribosomal protein s9; GO:0002119,40s ribosomal protein s9; GO:0003735,40s ribosomal protein s9; GO:0015935,40s ribosomal protein s9; GO:0000003,40s ribosomal protein s9; GO:0006412,40s ribosomal protein s9GO:0019843,40s ribosomal protein s9GO:0006915,40s ribosomal protein s9
Zoff002600	0	0	0	8	0	27	0	0	0	0	0	0	0	0	0	0.39	0	1.34	0	0	0	0	0	0	0.001	0.576667	0.001	0.001	9.17159	0.0347323	0	1	-9.17159	0.0525728	0	1	gi|656914946|gb|KEF60525.1|	hypothetical protein A1O9_02086 [Exophiala aquamarina CBS 119918]	ang:ANI_1_1062104	An12g08800; tRNA-splicing endonuclease	At4g30100	[A] KOG1801 tRNA-splicing endonuclease positive effector (SEN1)	sp|Q00416|SEN1_YEAST	Helicase SEN1 OS=Saccharomyces cerevisiae (strain ATCC 204508 / S288c) GN=SEN1 PE=1 SV=2	--
Zoff002690	0	0	0	26	2	8	0	0	1	2	0	0	0	0	0	1.28	0.11	0.4	0	0	0.05	0.1	0	0	0.001	0.596667	0.0166667	0.0333333	9.22078	0.0081319	1	1	-4.16189	0.10765	4.05889	1	gi|576992163|gb|EUC64843.1|	hypothetical protein RSOL_493030, partial [Rhizoctonia solani AG-3 Rhs1AP]	cci:CC1G_05170	hypothetical protein; K14316 nuclear pore complex protein Nup121	--	--	--	--	--
Zoff002779	8	1	0	0	0	0	0	1	7	6.65	13	5	0.39	0.05	0	0	0	0	0	0.05	0.35	0.34	0.67	0.25	0.146667	0.001	0.133333	0.42	-7.1964	0.740382	1.65535	1	8.71425	0.021383	-0.137504	1	gi|695074966|ref|XP_009384705.1|	PREDICTED: E3 ubiquitin-protein ligase Os04g0590900-like [Musa acuminata subsp. malaccensis]	pop:POPTR_423604	hypothetical protein	At1g72220	[O] KOG0800 FOG: Predicted E3 ubiquitin ligase	sp|Q7XLY8|ATL41_ORYSJ	E3 ubiquitin-protein ligase Os04g0590900 OS=Oryza sativa subsp. japonica GN=Os04g0590900 PE=2 SV=2	--
Zoff004044	5	5	7	0	0	0	1	1	6	1	0	0	0.25	0.25	0.35	0	0	0	0.05	0.05	0.3	0.05	0	0	0.283333	0.001	0.133333	0.0166667	-8.14636	0.0396091	-3	1	4.05889	1	-1.08746	1	gi|731374784|ref|XP_010667066.1|	PREDICTED: uncharacterized protein LOC104884165 [Beta vulgaris subsp. vulgaris]	vvi:100243220	hypothetical protein LOC100243220	At1g20390	[R] KOG0017 FOG: Transposon-encoded proteins with TYA, reverse transcriptase, integrase domains in various combinations	--	--	--
Zoff004122	4	4	6	22.86	17	9	6	2	3	2	1	0.5	0.2	0.2	0.3	1.13	0.98	0.45	0.3	0.1	0.15	0.1	0.05	0.02	0.233333	0.853333	0.183333	0.0566667	1.87072	0.188133	-1.6939	1	-3.91254	0.00983723	-0.347923	1	gi|695018211|ref|XP_009396059.1|	PREDICTED: nuclear transcription factor Y subunit A-4-like isoform X2 [Musa acuminata subsp. malaccensis]	pop:POPTR_652752	hypothetical protein	At1g30500	[K] KOG1561 CCAAT-binding factor, subunit B (HAP2)	sp|Q84JP1|NFYA7_ARATH	Nuclear transcription factor Y subunit A-7 OS=Arabidopsis thaliana GN=NFYA7 PE=2 SV=1	--
Zoff005076	0	0	0	10	3	7	0	0	0	0	0	0	0	0	0	0.49	0.17	0.35	0	0	0	0	0	0	0.001	0.336667	0.001	0.001	8.39518	0.0263815	0	1	-8.39518	0.0401692	0	1	gi|576982572|gb|EUC55315.1|	transmembrane protein, putative [Rhizoctonia solani AG-3 Rhs1AP]	lbc:LACBIDRAFT_304422	hypothetical protein	--	--	--	--	GO:0016021,hypothetical protein AG1IA_03525 [Rhizoctonia solani AG-1 IA]
Zoff005097	0	0	0	41	6	4	0	0	0	1	0	0	0	0	0	2.02	0.34	0.2	0	0	0	0.05	0	0	0.001	0.853333	0.001	0.0166667	9.73697	0.00211747	4.05889	1	-5.67807	0.0162141	0	1	gi|660964772|gb|KEP49712.1|	putative U3 snoRNP-associated protein Rrp5 [Rhizoctonia solani 123E]	lbc:LACBIDRAFT_187086	hypothetical protein; K14792 rRNA biogenesis protein RRP5	YMR229c	[A] KOG1070 rRNA processing protein Rrp5	sp|Q05022|RRP5_YEAST	rRNA biogenesis protein RRP5 OS=Saccharomyces cerevisiae (strain ATCC 204508 / S288c) GN=RRP5 PE=1 SV=1	GO:0003723,u3 snornp-associated protein rrp5; GO:0005622,u3 snornp-associated protein rrp5; GO:0006396,u3 snornp-associated protein rrp5
Zoff005179	0	0	0	1	0	0	1	0	2	6	5	18	0	0	0	0.05	0	0	0.05	0	0.1	0.3	0.26	0.89	0.001	0.0166667	0.05	0.483333	4.05889	1	3.27302	0.479395	4.85798	0.0490547	5.64386	1	gi|471915488|emb|CCO26446.1|	hypothetical protein BN14_00470 [Rhizoctonia solani AG-1 IB]	lbc:LACBIDRAFT_293419	hypothetical protein	--	--	--	--	--
Zoff006402	0	0	0	42	7	12	0	0	0	1	0	0	0	0	0	2.07	0.4	0.6	0	0	0	0.05	0	0	0.001	1.02333	0.001	0.0166667	9.99906	0.000102377	4.05889	1	-5.94017	0.00285278	0	1	gi|576990531|gb|EUC63240.1|	V-type proton ATPase subunit D 1 [Rhizoctonia solani AG-3 Rhs1AP]	scm:SCHCODRAFT_75276	hypothetical protein; K02146 V-type H+-transporting ATPase subunit AC39 [EC:3.6.3.14]	SPAC17A2.03c	[C] KOG2957 Vacuolar H+-ATPase V0 sector, subunit d	sp|Q6PGV1|VA0D1_DANRE	V-type proton ATPase subunit d 1 OS=Danio rerio GN=atp6v0d1 PE=1 SV=1	GO:0015991,atpase v0 complex subunit d; GO:0033179,atpase v0 complex subunit d; GO:0015078,atpase v0 complex subunit d
Zoff007147	1	2	3	4	2	31	0	0	10	0	0	0	0.05	0.1	0.15	0.2	0.11	1.54	0	0	0.5	0	0	0	0.1	0.616667	0.166667	0.001	2.62449	0.345651	-7.38082	1	-9.26835	0.0238854	0.736966	1	gi|628257746|ref|XP_007726036.1|	hypothetical protein A1O1_06971 [Capronia coronata CBS 617.96]	ssl:SS1G_12505	hypothetical protein	--	--	--	--	--
Zoff007615	2	0	0	22	0	42	0	0	3	0	0	0	0.1	0	0	1.08	0	2.08	0	0	0.15	0	0	0	0.0333333	1.05333	0.05	0.001	4.98185	0.0325625	-5.64386	1	-10.0407	0.00934319	0.584963	1	gi|168016731|ref|XP_001760902.1|	predicted protein [Physcomitrella patens]	ppp:PHYPADRAFT_162579	hypothetical protein; K02883 large subunit ribosomal protein L18e	At3g05590	[J] KOG1714 60s ribosomal protein L18	sp|P42791|RL182_ARATH	60S ribosomal protein L18-2 OS=Arabidopsis thaliana GN=RPL18B PE=1 SV=2	GO:0030529,60s ribosomal protein l18-3
Zoff007814	0	0	0	362	0	0	0	0	0	1	0	0	0	0	0	17.82	0	0	0	0	0	0.05	0	0	0.001	5.94	0.001	0.0166667	12.5362	0.0145925	4.05889	1	-8.47735	0.0371095	0	1	gi|524916402|ref|XP_005112978.1|	PREDICTED: uncharacterized protein LOC101845147 [Aplysia californica]	--	--	--	--	sp|P0C8G6|PV21_POMCA	Perivitellin-2 67 kDa subunit OS=Pomacea canaliculata PE=1 SV=2	--
Zoff007854	127.38	45.63	95.14	21.17	17.88	25.37	44.01	32.03	61.1	67.06	38.33	66.78	6.27	2.29	4.7	1.04	1.03	1.26	2.23	1.59	3.08	3.4	1.98	3.3	4.42	1.11	2.3	2.89333	-1.99349	0.0109701	0.331099	1	1.38217	0.3035	-0.942413	1	gi|729391356|ref|XP_010552350.1|	PREDICTED: heat shock protein 90-2 [Tarenaya hassleriana]	osa:4347402	Os09g0482100; K04079 molecular chaperone HtpG	At5g56000	[O] KOG0019 Molecular chaperone (HSP90 family)	sp|Q69QQ6|HSP82_ORYSJ	Heat shock protein 81-2 OS=Oryza sativa subsp. japonica GN=HSP81-2 PE=2 SV=1	GO:0005737,heat shock protein 81-1-like; GO:0006457,heat shock protein 81-1-like; GO:0005524,heat shock protein 81-1-like; GO:0051082,heat shock protein 81-1-like; GO:0009816,heat shock protein 81-1-like
Zoff008056	0	0	0	13	3	5	0	0	1	1	0	0	0	0	0	0.64	0.17	0.25	0	0	0.05	0.05	0	0	0.001	0.353333	0.0166667	0.0166667	8.46489	0.0298994	0	1	-4.40599	0.124409	4.05889	1	gi|576983107|gb|EUC55850.1|	Sas10/Utp3/C1D family protein [Rhizoctonia solani AG-3 Rhs1AP]	ppl:POSPLDRAFT_102208	hypothetical protein; K12592 exosome complex protein LRP1	Hs5453583	[L] KOG4835 DNA-binding protein C1D involved in regulation of double-strand break repair	sp|Q3KPR1|C1D_XENLA	Nuclear nucleic acid-binding protein C1D OS=Xenopus laevis GN=c1d PE=2 SV=1	--
Zoff009126	10	0	2	9	5	12	0	0	11	0	0	0	0.49	0	0.1	0.44	0.29	0.6	0	0	0.55	0	0	0	0.196667	0.443333	0.183333	0.001	1.17264	1	-7.51833	1	-8.79225	0.0126388	-0.101283	1	gi|671164621|ref|XP_008722777.1|	hypothetical protein G647_01154 [Cladophialophora carrionii CBS 160.54]	ssl:SS1G_14355	hypothetical protein ; K03510 DNA polymerase iota subunit [EC:2.7.7.7]	Hs6005848	[L] KOG2095 DNA polymerase iota/DNA damage inducible protein	sp|Q9UNA4|POLI_HUMAN	DNA polymerase iota OS=Homo sapiens GN=POLI PE=1 SV=3	GO:0006259,dna polymerase iota subunit; GO:0003677,dna polymerase iota subunit
Zoff009161	1	0	1	2	1	39	3	0	6	0	0	0	0.05	0	0.05	0.1	0.06	1.94	0.15	0	0.3	0	0	0	0.0333333	0.7	0.15	0.001	4.39232	0.125627	-7.22882	1	-9.45121	0.0380848	2.16993	1	gi|628273199|ref|XP_007727656.1|	dolichyl-phosphate beta-glucosyltransferase [Capronia coronata CBS 617.96]	pcs:Pc22g16060	Pc22g16060; K00729 dolichyl-phosphate beta-glucosyltransferase [EC:2.4.1.117]	SPBC56F2.10c	[R] KOG2977 Glycosyltransferase	sp|O60061|ALG5_SCHPO	Dolichyl-phosphate beta-glucosyltransferase OS=Schizosaccharomyces pombe (strain 972 / ATCC 24843) GN=alg5 PE=3 SV=1	GO:0016757,dolichyl-phosphate beta-glucosyltransferase; GO:0008152,dolichyl-phosphate beta-glucosyltransferase
Zoff009538	0	1	0	14	4	54	1	1	10	0	0	0	0	0.05	0	0.69	0.23	2.68	0.05	0.05	0.5	0	0	0	0.0166667	1.2	0.2	0.001	6.16993	0.000986141	-7.64386	0.740663	-10.2288	0.0010267	3.58496	1	gi|628328400|ref|XP_007743882.1|	hypothetical protein A1O5_05089 [Cladophialophora psammophila CBS 110553]	ssl:SS1G_07001	hypothetical protein	--	--	--	--	--
Zoff009628	5	5	4	2	3	7	331	4	347	3	1	0	0.25	0.25	0.2	0.1	0.17	0.35	16.74	0.2	17.47	0.15	0.05	0	0.233333	0.206667	11.47	0.0666667	-0.175087	1	-7.42668	0.0076931	-1.63227	1	5.61933	0.0204638	gi|308082013|ref|NP_001183396.1|	uncharacterized protein LOC100501813 [Zea mays]	zma:100501813	hypothetical protein LOC100501813	At1g47128_1	[O] KOG1543 Cysteine proteinase Cathepsin L	sp|P82474|CPGP2_ZINOF	Zingipain-2 OS=Zingiber officinale PE=1 SV=1	GO:0032440,oryzain alpha chain-like; GO:0006508,oryzain alpha chain-like; GO:0055114,oryzain alpha chain-like; GO:0008234,oryzain alpha chain-like
Zoff009943	0	0	0	0	3	37	2	0	1	0	0	1	0	0	0	0	0.17	1.84	0.1	0	0.05	0	0	0.05	0.001	0.67	0.05	0.0166667	9.38802	0.0456195	-1.58496	1	-5.32912	0.148444	5.64386	1	gi|656914651|gb|KEF60231.1|	hypothetical protein A1O9_05081 [Exophiala aquamarina CBS 119918]	pno:SNOG_12378	hypothetical protein	--	--	--	--	--
Zoff010027	0	0	2	3	2	31.72	0	0	5	0	0	0	0	0	0.1	0.15	0.11	1.57	0	0	0.25	0	0	0	0.0333333	0.61	0.0833333	0.001	4.19377	0.12551	-6.38082	1	-9.25267	0.0283256	1.32193	1	gi|656917106|gb|KEF62684.1|	glutamate-5-semialdehyde dehydrogenase [Exophiala aquamarina CBS 119918]	pcs:Pc13g05550	Pc13g05550; K00147 glutamate-5-semialdehyde dehydrogenase [EC:1.2.1.41]	SPAC821.11	[E] KOG4165 Gamma-glutamyl phosphate reductase	sp|Q9UT44|PROA_SCHPO	Probable gamma-glutamyl phosphate reductase OS=Schizosaccharomyces pombe (strain 972 / ATCC 24843) GN=pro1 PE=3 SV=1	GO:0050661,glutamate-5-semialdehyde dehydrogenase; GO:0006561,glutamate-5-semialdehyde dehydrogenase; GO:0004350,glutamate-5-semialdehyde dehydrogenase; GO:0055114,glutamate-5-semialdehyde dehydrogenase
Zoff010055	21	202	209	117	233	63	24	18	42	10	28	29	1.03	10.12	10.32	5.76	13.38	3.13	1.21	0.89	2.12	0.51	1.45	1.43	7.15667	7.42333	1.40667	1.13	0.0527794	1	-0.315958	1	-2.71574	0.0143167	-2.34701	0.406639	gi|656906384|gb|KEF52127.1|	aquaglyceroporin like protein, other eukaryote [Exophiala aquamarina CBS 119918]	bfu:BC1G_12166	hypothetical protein ; K03441 aquaglyceroporin related protein, other eukaryote	YFL054c	[G] KOG0224 Aquaporin (major intrinsic protein family)	sp|P43549|YFF4_YEAST	Uncharacterized membrane protein YFL054C OS=Saccharomyces cerevisiae (strain ATCC 204508 / S288c) GN=YFL054C PE=1 SV=1	GO:0016021,aquaglyceroporin like other eukaryote; GO:0006810,aquaglyceroporin like other eukaryote; GO:0005215,aquaglyceroporin like other eukaryote
Zoff010311	0	0	0	0	0	0	0	0	0	2	0	63	0	0	0	0	0	0	0	0	0	0.1	0	3.11	0.001	0.001	0.001	1.07	0	1	10.0634	0.137069	10.0634	0.0359012	0	1	gi|675183715|ref|XP_008900742.1|	hypothetical protein PPTG_08414 [Phytophthora parasitica INRA-310]	pif:PITG_07915	hypothetical protein	--	--	--	--	--
Zoff010329	2	11.05	9.51	18.92	16.45	44.81	9	6	18.61	2.83	1	0	0.1	0.55	0.47	0.93	0.94	2.22	0.46	0.3	0.94	0.14	0.05	0	0.373333	1.36333	0.566667	0.0633333	1.8686	0.149903	-3.16146	0.46092	-4.42803	0.00164307	0.602036	1	gi|53830035|gb|AAU94925.1|	floral homeotic protein [Triticum carthlicum]	pop:POPTR_820288	RAP3; AP2 domain-containing transcription factor	--	--	sp|Q9LVG2|TOE2_ARATH	AP2-like ethylene-responsive transcription factor TOE2 OS=Arabidopsis thaliana GN=TOE2 PE=1 SV=1	GO:0006355,ethylene-responsive transcription factor rap2-7-like isoform x2; GO:0003700,ethylene-responsive transcription factor rap2-7-like isoform x2; GO:0003677,ethylene-responsive transcription factor rap2-7-like isoform x2; GO:0005634,ethylene-responsive transcription factor rap2-7-like isoform x2
Zoff010368	0	1	0	1.5	4	36.74	0	0	1.5	0	0	0	0	0.05	0	0.07	0.23	1.82	0	0	0.08	0	0	0	0.0166667	0.706667	0.0266667	0.001	5.40599	0.039037	-4.73697	1	-9.46489	0.0210733	0.678072	1	gi|656911926|gb|KEF57508.1|	hypothetical protein A1O9_05425 [Exophiala aquamarina CBS 119918]	ang:ANI_1_1378094	An11g10610; glycosyl transferase family protein	At1g60470	[G] KOG1950 Glycosyl transferase, family 8 - glycogenin	sp|O22693|GOLS4_ARATH	Galactinol synthase 4 OS=Arabidopsis thaliana GN=GOLS4 PE=2 SV=1	GO:0008152,glycosyl transferase family protein; GO:0016757,glycosyl transferase family protein
Zoff010512	0	0	0	0	0	0	0	0	0	2	1	57	0	0	0	0	0	0	0	0	0	0.1	0.05	2.82	0.001	0.001	0.001	0.99	0	1	9.95128	0.0975098	9.95128	0.0214784	0	1	gi|695397020|ref|XP_009521636.1|	hypothetical protein PHYSODRAFT_258670 [Phytophthora sojae]	pif:PITG_12216	hypothetical protein	--	--	--	--	--
Zoff010515	0	0	0	17	4	10	0	0	1	5	1	2	0	0	0	0.84	0.23	0.5	0	0	0.05	0.25	0.05	0.1	0.001	0.523333	0.0166667	0.133333	9.03159	0.00353645	3	1	-1.97269	0.573505	4.05889	1	gi|576987650|gb|EUC60374.1|	CHCH domain protein [Rhizoctonia solani AG-3 Rhs1AP]	ure:UREG_06384	coiled-coil-helix-coiled-coil-helix domain-containing protein 4	YKL195w	[S] KOG4149 Uncharacterized conserved protein	sp|P0C1D2|MIA40_EMENI	Mitochondrial intermembrane space import and assembly protein 40 OS=Emericella nidulans (strain FGSC A4 / ATCC 38163 / CBS 112.46 / NRRL 194 / M139) GN=mia40 PE=3 SV=1	--
Zoff010781	0	0	0	0	0	0	0	0	1	6	0	52	0	0	0	0	0	0	0	0	0.05	0.3	0	2.57	0.001	0.001	0.0166667	0.956667	0	1	5.84298	0.211615	9.90187	0.0254654	4.05889	1	gi|570998304|gb|ETP54552.1|	hypothetical protein F442_00778 [Phytophthora parasitica P10297]	pif:PITG_01504	protein phosphatase PP2A regulatory subunit B; K04354 protein phosphatase 2 (formerly 2A), regulatory subunit B	At1g17720	[T] KOG1354 Serine/threonine protein phosphatase 2A, regulatory subunit	sp|Q39247|2ABB_ARATH	Serine/threonine protein phosphatase 2A 55 kDa regulatory subunit B beta isoform OS=Arabidopsis thaliana GN=PP2AB2 PE=1 SV=1	GO:0000159,protein phosphatase pp2a regulatory subunit b; GO:0007165,protein phosphatase pp2a regulatory subunit b; GO:0050790,protein phosphatase pp2a regulatory subunit b; GO:0008601,protein phosphatase pp2a regulatory subunit b
Zoff011563	190	154.99	143	502	330	411	82	256.06	131.99	99	163	148	9.35	7.77	7.06	24.71	18.95	20.39	4.15	12.68	6.65	5.02	8.43	7.32	8.06	21.35	7.82667	6.92333	1.40538	0.0157126	-0.176931	1	-1.6247	0.065881	-0.0423818	1	gi|695063688|ref|XP_009420357.1|	PREDICTED: uncharacterized protein LOC104000126 [Musa acuminata subsp. malaccensis]	rcu:RCOM_0178710	hypothetical protein	At1g07200	[O] KOG1051 Chaperone HSP104 and related ATP-dependent Clp proteases	--	--	--
Zoff011569	0	0	0	22.02	1	5.72	0	0	0	0	3	1	0	0	0	1.08	0.06	0.28	0	0	0	0	0.16	0.05	0.001	0.473333	0.001	0.07	8.88671	0.0302668	6.12928	1	-2.75743	0.47738	0	1	gi|443927354|gb|ELU45855.1|	Cyclin domain-containing protein [Rhizoctonia solani AG-1 IA]	cne:CNG01990	g1/S-specific cyclin pcl1 (cyclin hcs26)	YDL127w	[R] KOG1674 Cyclin	sp|P25693|PCL2_YEAST	PHO85 cyclin-2 OS=Saccharomyces cerevisiae (strain ATCC 204508 / S288c) GN=PCL2 PE=1 SV=2	GO:0009987,g1 s-specific cyclin pcl1 (cyclin hcs26)
Zoff011635	4	4	3	4	5	20	0	4	13	0	0	0	0.2	0.2	0.15	0.2	0.29	0.99	0	0.2	0.65	0	0	0	0.183333	0.493333	0.283333	0.001	1.42809	0.919448	-8.14636	0.559038	-8.94642	0.0192012	0.628031	1	gi|684160823|ref|XP_009154289.1|	DEAD box RNA helicase HelA [Exophiala dermatitidis NIH/UT8656]	mgr:MGG_10312	MG10312.4; hypothetical protein	At5g08620	[A] KOG0342 ATP-dependent RNA helicase pitchoune	sp|Q94C75|RH25_ARATH	DEAD-box ATP-dependent RNA helicase 25 OS=Arabidopsis thaliana GN=RH25 PE=2 SV=2	GO:0000166,atp-dependent rna helicase mss116; GO:0004386,atp-dependent rna helicase mss116; GO:0008152,atp-dependent rna helicase mss116
Zoff011818	332.53	451	219	603.48	672	603	101	273	93	81	102	118	16.36	22.6	10.81	29.7	38.6	29.92	5.11	13.52	4.68	4.11	5.27	5.83	16.59	32.74	7.77	5.07	0.98074	0.31562	-0.615929	1	-2.691	0.000239933	-1.09433	1	gi|695076644|ref|XP_009385622.1|	PREDICTED: auxin-responsive protein IAA1 [Musa acuminata subsp. malaccensis]	rcu:RCOM_0895150	Auxin-responsive protein IAA1, putative	--	--	sp|Q6AT10|IAA15_ORYSJ	Auxin-responsive protein IAA15 OS=Oryza sativa subsp. japonica GN=IAA15 PE=2 SV=1	GO:0009734,auxin-responsive protein iaa1-like; GO:0006355,auxin-responsive protein iaa1-like; GO:0046983,auxin-responsive protein iaa1-like; GO:0005634,auxin-responsive protein iaa1-like
Zoff012147	0	0	1	0	0	0	0	0	0	2	0	225	0	0	0.05	0	0	0	0	0	0	0.1	0	11.12	0.0166667	0.001	0.001	3.74	-4.05889	1	11.8688	0.0592805	11.8688	0.010126	-4.05889	1	gi|695413235|ref|XP_009525971.1|	hypothetical protein PHYSODRAFT_504273 [Phytophthora sojae]	pif:PITG_01446	hypothetical protein	At1g48600	[IR] KOG1269 SAM-dependent methyltransferases	sp|Q83WC3|SDMT_APHHA	Sarcosine/dimethylglycine N-methyltransferase OS=Aphanothece halophytica PE=1 SV=1	--
Zoff012274	6	9	1	12	7	62	4	0	18	2	0	0	0.3	0.45	0.05	0.59	0.4	3.08	0.2	0	0.91	0.1	0	0	0.266667	1.35667	0.37	0.0333333	2.34696	0.211991	-3.47249	1	-5.34696	0.0046375	0.472488	1	gi|656910120|gb|KEF55798.1|	serine palmitoyltransferase [Exophiala aquamarina CBS 119918]	nfi:NFIA_013640	serine palmitoyltransferase 2, putative; K00654 serine palmitoyltransferase [EC:2.3.1.50]	YDR062w	[O] KOG1357 Serine palmitoyltransferase	sp|Q09925|LCB2_SCHPO	Serine palmitoyltransferase 2 OS=Schizosaccharomyces pombe (strain 972 / ATCC 24843) GN=lcb2 PE=3 SV=1	GO:0006687,serine palmitoyltransferase; GO:0030170,serine palmitoyltransferase; GO:0009058,serine palmitoyltransferase; GO:0004758,serine palmitoyltransferase
Zoff012278	4	12	9	23	15	2	1	0	1	13	39	24	0.2	0.6	0.44	1.13	0.86	0.1	0.05	0	0.05	0.66	2.02	1.19	0.413333	0.696667	0.0333333	1.29	0.753163	1	5.27426	0.0176437	0.888831	1	-3.63227	0.489257	gi|671171560|ref|XP_008726246.1|	hypothetical protein G647_03679 [Cladophialophora carrionii CBS 160.54]	bfu:BC1G_07186	hypothetical protein ; K08257 mannan endo-1,6-alpha-mannosidase [EC:3.2.1.101]	--	--	sp|P36091|DCW1_YEAST	Mannan endo-1,6-alpha-mannosidase DCW1 OS=Saccharomyces cerevisiae (strain ATCC 204508 / S288c) GN=DCW1 PE=1 SV=1	GO:0008496,mannan endo- -alpha-mannosidase; GO:0016052,mannan endo- -alpha-mannosidase
Zoff012319	1	0	0	4	0	80	0	0	7.41	0	0	0	0.05	0	0	0.2	0	3.97	0	0	0.37	0	0	0	0.0166667	1.39	0.123333	0.001	6.38198	0.0286817	-6.94642	1	-10.4409	0.0166126	2.88753	1	gi|628340606|ref|XP_007747358.1|	NADH dehydrogenase [Cladophialophora psammophila CBS 110553]	ang:ANI_1_12124	An14g00060; NADH-ubiquinone oxidoreductase subunit	--	--	sp|Q02854|NUXM_NEUCR	NADH-ubiquinone oxidoreductase 20.9 kDa subunit OS=Neurospora crassa (strain ATCC 24698 / 74-OR23-1A / CBS 708.71 / DSM 1257 / FGSC 987) GN=nuo20.9 PE=1 SV=1	GO:0016491,nadh dehydrogenase
Zoff012423	1	0	0	4	4	25	3	0	4	0	0	1	0.05	0	0	0.2	0.23	1.24	0.15	0	0.2	0	0	0.05	0.0166667	0.556667	0.116667	0.0166667	5.06178	0.031981	-2.80735	1	-5.06178	0.0518212	2.80735	1	gi|628252085|ref|XP_007725332.1|	hypothetical protein A1O1_06263 [Capronia coronata CBS 617.96]	afm:AFUA_2G18000	short chain dehydrogenase/oxidoreductase CpoX2 (EC:1.-.-.-); K00540 [EC:1.-.-.-]	CE23899	[R] KOG0725 Reductases with broad range of substrate specificities	sp|D4AK45|CHADH_ARTBC	Chanoclavine-I dehydrogenase OS=Arthroderma benhamiae (strain ATCC MYA-4681 / CBS 112371) GN=ARB_04646 PE=1 SV=1	GO:0035837,short chain dehydrogenase oxidoreductase 2; GO:0016616,short chain dehydrogenase oxidoreductase 2; GO:0055114,short chain dehydrogenase oxidoreductase 2; GO:0051289,short chain dehydrogenase oxidoreductase 2
Zoff012991	24.92	45.98	34.96	3	8	3	9	35.04	22	3	23.79	6.75	1.23	2.3	1.73	0.15	0.46	0.15	0.46	1.74	1.11	0.15	1.23	0.33	1.75333	0.253333	1.10333	0.57	-2.79099	0.00173563	-0.952835	1	1.16993	1	-0.668232	1	gi|683437182|pdb|4MKR|A	Chain A, Structure Of The Apo Form Of A Zingiber Officinale Double Bond Reductase	rcu:RCOM_0605900	alcohol dehydrogenase, putative (EC:1.3.1.74)	At5g17000	[R] KOG1196 Predicted NAD-dependent oxidoreductase	sp|Q9SLN8|DBR_TOBAC	2-alkenal reductase (NADP(+)-dependent) OS=Nicotiana tabacum GN=DBR PE=1 SV=1	GO:0032440,2-alkenal reductase (nadp(+)-dependent)-like; GO:0016747,2-alkenal reductase (nadp(+)-dependent)-like; GO:0055114,2-alkenal reductase (nadp(+)-dependent)-like; GO:0008270,2-alkenal reductase (nadp(+)-dependent)-like
Zoff013090	59.33	20.01	67.79	9.3	9.41	17.85	23.33	55.57	57.88	64.97	75.67	43.1	2.92	1	3.35	0.46	0.54	0.89	1.18	2.75	2.91	3.3	3.91	2.13	2.42333	0.63	2.28	3.11333	-1.94357	0.051635	0.449426	1	2.30504	0.0197309	-0.087959	1	gi|695054173|ref|XP_009415209.1|	PREDICTED: uncharacterized protein LOC103996108 isoform X1 [Musa acuminata subsp. malaccensis]	osa:4339814	Os05g0595300	--	--	--	--	--
Zoff013091	77.67	23.99	75.21	21.7	13.59	24.15	36.67	163.43	106.12	89.03	180.33	74.9	3.82	1.2	3.71	1.07	0.78	1.2	1.85	8.09	5.34	4.52	9.33	3.7	2.91	1.01667	5.09333	5.85	-1.51717	0.170417	0.199826	1	2.52459	0.00729764	0.807591	1	gi|695054173|ref|XP_009415209.1|	PREDICTED: uncharacterized protein LOC103996108 isoform X1 [Musa acuminata subsp. malaccensis]	osa:4339814	Os05g0595300	--	--	--	--	--
Zoff013121	0	0	0	33	4	1	0	0	2	1	0	1	0	0	0	1.62	0.23	0.05	0	0	0.1	0.05	0	0.05	0.001	0.633333	0.0333333	0.0333333	9.30682	0.0207422	0	1	-4.24793	0.141842	5.05889	1	gi|660970238|gb|KEP54034.1|	putative GC-rich sequence DNA-binding factor [Rhizoctonia solani 123E]	cci:CC1G_11705	hypothetical protein; K13211 GC-rich sequence DNA-binding factor	Hs7108365	[K] KOG2136 Transcriptional regulators binding to the GC-rich sequences	sp|P16383|GCFC2_HUMAN	GC-rich sequence DNA-binding factor 2 OS=Homo sapiens GN=GCFC2 PE=1 SV=2	GO:0016020,gcfc-domain-containing protein; GO:0006355,gcfc-domain-containing protein; GO:0003677,gcfc-domain-containing protein; GO:0071702,gcfc-domain-containing protein; GO:0044765,gcfc-domain-containing protein; GO:0003700,gcfc-domain-containing protein; GO:0071008,gcfc-domain-containing proteinGO:0000390,gcfc-domain-containing protein
Zoff013333	1	0	0	7	4	17	0	1	1	0	2	1	0.05	0	0	0.34	0.23	0.84	0	0.05	0.05	0	0.1	0.05	0.0166667	0.47	0.0333333	0.05	4.81762	0.0267068	0.584963	1	-3.23266	0.175029	1	1	gi|545710127|ref|XP_005707372.1|	40S ribosomal protein S15A [Galdieria sulphuraria]	bta:337888	RPS15A, MGC133517; ribosomal protein S15A; K02957 small subunit ribosomal protein S15Ae	Hs14165469	[J] KOG1754 40S ribosomal protein S15/S22	sp|P62246|RS15A_RAT	40S ribosomal protein S15a OS=Rattus norvegicus GN=Rps15a PE=1 SV=2	GO:0000184,40s ribosomal protein s15a; GO:0009615,40s ribosomal protein s15a; GO:0006415,40s ribosomal protein s15a; GO:0006413,40s ribosomal protein s15a; GO:0016020,40s ribosomal protein s15a; GO:0044822,40s ribosomal protein s15a; GO:0006414,40s ribosomal protein s15aGO:0008284,40s ribosomal protein s15aGO:0070062,40s ribosomal protein s15aGO:0003735,40s ribosomal protein s15aGO:0019083,40s ri…
Zoff013631	0	0	0	0	27	6	0	0	0	0	0	0	0	0	0	0	1.55	0.3	0	0	0	0	0	0	0.001	0.616667	0.001	0.001	9.26835	0.0420445	0	1	-9.26835	0.0579517	0	1	gi|639570384|gb|KDN47799.1|	hypothetical protein RSAG8_03219, partial [Rhizoctonia solani AG-8 WAC10335]	pno:SNOG_07944	hypothetical protein	Hs4507467	[MW] KOG1437 Fasciclin and related adhesion glycoproteins	sp|P74615|Y1483_SYNY3	Uncharacterized protein sll1483 OS=Synechocystis sp. (strain PCC 6803 / Kazusa) GN=sll1483 PE=3 SV=1	--
Zoff013839	107.78	80.31	89.11	20.57	31.02	36.7	63.87	51.2	48.83	41.29	28.8	51.13	5.3	4.02	4.4	1.01	1.78	1.82	3.23	2.54	2.46	2.09	1.49	2.53	4.57333	1.53667	2.74333	2.03667	-1.57344	0.0288537	-0.42972	1	0.406406	1	-0.737316	1	gi|223973369|gb|ACN30872.1|	unknown [Zea mays]	ctp:CTRG_02484	40S ribosomal protein S15	--	--	--	--	--
Zoff013840	161.22	124.69	155.89	51.43	45.98	33.3	99.13	76.8	85.17	64.71	43.2	93.87	7.93	6.25	7.69	2.53	2.64	1.65	5.01	3.8	4.29	3.28	2.23	4.64	7.29	2.27333	4.36667	3.38333	-1.68111	0.00802958	-0.368087	1	0.573636	1	-0.739386	1	gi|223973369|gb|ACN30872.1|	unknown [Zea mays]	--	--	--	--	--	--	--
Zoff013991	0	0	0	6	2	14.46	5	0	0	1	0	0	0	0	0	0.3	0.11	0.72	0.25	0	0	0.05	0	0	0.001	0.376667	0.0833333	0.0166667	8.55714	0.0323671	-2.32193	1	-4.49825	0.132654	6.38082	1	gi|656912560|gb|KEF58142.1|	3-isopropylmalate dehydrogenase [Exophiala aquamarina CBS 119918]	fgr:FG10671.1	hypothetical protein; K00052 3-isopropylmalate dehydrogenase [EC:1.1.1.85]	YCL018w	[E] KOG0786 3-isopropylmalate dehydrogenase	sp|Q12545|LEU3_ACRCH	3-isopropylmalate dehydrogenase OS=Acremonium chrysogenum GN=LEU2 PE=3 SV=1	GO:0005737,3-isopropylmalate dehydrogenase; GO:0051287,3-isopropylmalate dehydrogenase; GO:0000287,3-isopropylmalate dehydrogenase; GO:0003862,3-isopropylmalate dehydrogenase; GO:0009098,3-isopropylmalate dehydrogenase; GO:0055114,3-isopropylmalate dehydrogenase
Zoff014024	0	1	0	1	0	1	193.6	3	1	0	0	0	0	0.05	0	0.05	0	0.05	9.79	0.15	0.05	0	0	0	0.0166667	0.0333333	3.33	0.001	1	1	-11.7013	0.0372911	-5.05889	1	7.64241	0.130566	gi|591420450|gb|EXL55587.1|	hypothetical protein FOCG_06155 [Fusarium oxysporum f. sp. radicis-lycopersici 26381]	fgr:FG03969.1	hypothetical protein	--	--	--	--	--
Zoff014311	0	0	0	3	0	2	0	0	0	19	9	9	0	0	0	0.15	0	0.1	0	0	0	0.96	0.47	0.44	0.001	0.0833333	0.001	0.623333	6.38082	1	9.28386	0.0472064	2.90304	0.136057	0	1	gi|576994663|gb|EUC67258.1|	pyruvate decarboxylase [Rhizoctonia solani AG-3 Rhs1AP]	cnb:CNBJ2540	hypothetical protein; K01568 pyruvate decarboxylase [EC:4.1.1.1]	YLR044c	[EH] KOG1184 Thiamine pyrophosphate-requiring enzyme	sp|Q0CNV1|PDC_ASPTN	Pyruvate decarboxylase OS=Aspergillus terreus (strain NIH 2624 / FGSC A1156) GN=pdcA PE=3 SV=1	GO:0008152,pyruvate decarboxylase; GO:0016831,pyruvate decarboxylase; GO:0000287,pyruvate decarboxylase; GO:0030976,pyruvate decarboxylase
Zoff014319	4	0	0	2	5	36	0	0	3	0	0	0	0.2	0	0	0.1	0.29	1.79	0	0	0.15	0	0	0	0.0666667	0.726667	0.05	0.001	3.44626	0.218879	-5.64386	1	-9.50515	0.0155727	-0.415037	1	gi|684161203|ref|XP_009154479.1|	transcription initiation factor TFIIA small subunit [Exophiala dermatitidis NIH/UT8656]	pcs:Pc21g02570	Pc21g02570; K03123 transcription initiation factor TFIIA small subunit	SPCC553.11c	[K] KOG3463 Transcription initiation factor IIA, gamma subunit	sp|Q5BB99|T2AG_EMENI	Transcription initiation factor IIA subunit 2 OS=Emericella nidulans (strain FGSC A4 / ATCC 38163 / CBS 112.46 / NRRL 194 / M139) GN=toa2 PE=3 SV=1	GO:0003743,transcription initiation factor tfiia small subunit; GO:0006413,transcription initiation factor tfiia small subunit; GO:0006367,transcription initiation factor tfiia small subunit; GO:0005672,transcription initiation factor tfiia small subunit; GO:0006355,transcription initiation factor tfiia small subunit
Zoff014364	0	0	3	3	2	30	1	0	3	0	0	0	0	0	0.15	0.15	0.11	1.49	0.05	0	0.15	0	0	0	0.05	0.583333	0.0666667	0.001	3.54432	0.238733	-6.05889	1	-9.18818	0.031598	0.415037	1	gi|656908598|gb|KEF54322.1|	CAMK protein kinase [Exophiala aquamarina CBS 119918]	nfi:NFIA_090160	protein kinase, putative	--	--	--	--	GO:0016301,camk protein kinase; GO:0009987,camk protein kinase
Zoff014365	58	67	32	40	36	20	44	19	44	2	10	6	2.85	3.36	1.58	1.97	2.07	0.99	2.23	0.94	2.22	0.1	0.52	0.3	2.59667	1.67667	1.79667	0.306667	-0.631065	1	-2.55058	0.214463	-2.45085	0.0474962	-0.531338	1	gi|694997993|ref|XP_009402236.1|	PREDICTED: uncharacterized protein LOC103986080 [Musa acuminata subsp. malaccensis]	rcu:RCOM_0422850	hypothetical protein	--	--	--	--	--
Zoff014373	0	0	0	0	0	0	0	0	0	5.31	0	35.85	0	0	0	0	0	0	0	0	0	0.27	0	1.77	0.001	0.001	0.001	0.68	0	1	9.40939	0.182432	9.40939	0.0493589	0	1	gi|695438172|ref|XP_009532397.1|	hypothetical protein PHYSODRAFT_286921 [Phytophthora sojae]	pif:PITG_12427	hypothetical protein; K02265 cytochrome c oxidase subunit Vb [EC:1.9.3.1]	7297135	[C] KOG3352 Cytochrome c oxidase, subunit Vb/COX4	sp|P10606|COX5B_HUMAN	Cytochrome c oxidase subunit 5B, mitochondrial OS=Homo sapiens GN=COX5B PE=1 SV=2	GO:0005739,cytochrome c oxidase subunit mitochondrial-like
Zoff014374	0	0	0	0	0	0	0	0	0	19.69	2	226.15	0	0	0	0	0	0	0	0	0	1	0.1	11.18	0.001	0.001	0.001	4.09333	0	1	11.9991	0.0126416	11.9991	0.00051612	0	1	gi|695438172|ref|XP_009532397.1|	hypothetical protein PHYSODRAFT_286921 [Phytophthora sojae]	pif:PITG_12427	hypothetical protein; K02265 cytochrome c oxidase subunit Vb [EC:1.9.3.1]	7297135	[C] KOG3352 Cytochrome c oxidase, subunit Vb/COX4	sp|P10606|COX5B_HUMAN	Cytochrome c oxidase subunit 5B, mitochondrial OS=Homo sapiens GN=COX5B PE=1 SV=2	GO:0005739,cytochrome c oxidase subunit mitochondrial-like
Zoff014430	0	0	0	20	5	7	0	0	1	1	0	0	0	0	0	0.98	0.29	0.35	0	0	0.05	0.05	0	0	0.001	0.54	0.0166667	0.0166667	9.07682	0.0037098	0	1	-5.01792	0.0304045	4.05889	1	gi|576982842|gb|EUC55585.1|	tRNA pseudouridine synthase [Rhizoctonia solani AG-3 Rhs1AP]	scm:SCHCODRAFT_82025	hypothetical protein; K06173 tRNA pseudouridine synthase A [EC:5.4.99.12]	YPL212c	[J] KOG2553 Pseudouridylate synthase	sp|Q6CC39|PUS1_YARLI	tRNA pseudouridine synthase 1 OS=Yarrowia lipolytica (strain CLIB 122 / E 150) GN=PUS1 PE=3 SV=1	GO:0009982,pseudouridine synthase; GO:0003723,pseudouridine synthase; GO:0001522,pseudouridine synthase; GO:0008033,pseudouridine synthase
Zoff014488	0	0	0	2	0	47	1	1	4	0	0	0	0	0	0	0.1	0	2.33	0.05	0.05	0.2	0	0	0	0.001	0.81	0.1	0.001	9.66178	0.0400999	-6.64386	1	-9.66178	0.056362	6.64386	1	gi|656913270|gb|KEF58850.1|	hypothetical protein A1O9_03693 [Exophiala aquamarina CBS 119918]	--	--	--	--	--	--	--
Zoff014577	0	0	0	2	0	51.56	0	0	13	0	0	0	0	0	0	0.1	0	2.56	0	0	0.65	0	0	0	0.001	0.886667	0.216667	0.001	9.79225	0.0354345	-7.75933	1	-9.79225	0.0472781	7.75933	1	gi|656908041|gb|KEF53777.1|	hypothetical protein A1O9_10178 [Exophiala aquamarina CBS 119918]	fgr:FG03324.1	hypothetical protein	--	--	--	--	GO:0005525,uncharacterized protein ffuj_10793; GO:0005622,uncharacterized protein ffuj_10793; GO:0007264,uncharacterized protein ffuj_10793
Zoff014699	0	0	0	11	4	34	0	0	3.48	0	0	0	0	0	0	0.54	0.23	1.69	0	0	0.18	0	0	0	0.001	0.82	0.06	0.001	9.67948	0.000819636	-5.90689	1	-9.67948	0.0032693	5.90689	1	gi|656908414|gb|KEF54149.1|	hypothetical protein A1O9_09944 [Exophiala aquamarina CBS 119918]	ang:ANI_1_348034	An03g03000; ThiF domain protein	YKL027w	[O] KOG2018 Predicted dinucleotide-utilizing enzyme involved in molybdopterin and thiamine biosynthesis	sp|P36101|TCD2_YEAST	tRNA threonylcarbamoyladenosine dehydratase 2 OS=Saccharomyces cerevisiae (strain ATCC 204508 / S288c) GN=TCD2 PE=1 SV=1	GO:0008152,ubiquitin-protein ligase molybdopterin-converting factor; GO:0003824,ubiquitin-protein ligase molybdopterin-converting factor
Zoff014801	1	0	0	8	0	57	0	0	17	0	0	0	0.05	0	0	0.39	0	2.83	0	0	0.86	0	0	0	0.0166667	1.07333	0.286667	0.001	6.00899	0.0271899	-8.16323	0.923908	-10.0679	0.0165554	4.10434	1	gi|684174809|ref|XP_009161273.1|	NADH dehydrogenase [Exophiala dermatitidis NIH/UT8656]	nfi:NFIA_090140	NADH-ubiquinone oxidoreductase 12 kda subunit, putative	At3g18410	[C] KOG4009 NADH-ubiquinone oxidoreductase, subunit NDUFB10/PDSW	sp|Q03015|NDUS6_NEUCR	NADH-ubiquinone oxidoreductase 12 kDa subunit, mitochondrial OS=Neurospora crassa (strain ATCC 24698 / 74-OR23-1A / CBS 708.71 / DSM 1257 / FGSC 987) GN=nuo-12.3 PE=3 SV=2	GO:0055114,nadh dehydrogenase; GO:0008137,nadh dehydrogenase
Zoff014860	38	5	16	30	33	25	11	6	4	3	4	10	1.87	0.25	0.79	1.48	1.9	1.24	0.56	0.3	0.2	0.15	0.21	0.49	0.97	1.54	0.353333	0.283333	0.666874	1	-0.31853	1	-2.44236	0.0388418	-1.45695	1	gi|702484045|ref|XP_010033884.1|	PREDICTED: heat shock 70 kDa protein 14-like [Eucalyptus grandis]	osa:4325355	Os01g0180800; K09489 heat shock 70kDa protein 4	At1g79930	[O] KOG0103 Molecular chaperones HSP105/HSP110/SSE1, HSP70 superfamily	sp|F4HQD4|HSP7P_ARATH	Heat shock 70 kDa protein 15 OS=Arabidopsis thaliana GN=HSP70-15 PE=1 SV=1	GO:0005524,heat shock 70 kda protein 14-like
Zoff014909	0	0	0	23	3	7.18	0	0	2	1.25	3	1.69	0	0	0	1.13	0.17	0.36	0	0	0.1	0.06	0.16	0.08	0.001	0.553333	0.0333333	0.1	9.11201	0.00660905	1.58496	1	-2.46815	0.357089	5.05889	1	gi|639571288|gb|KDN48696.1|	hypothetical protein RSAG8_02683, partial [Rhizoctonia solani AG-8 WAC10335]	lbc:LACBIDRAFT_190410	hypothetical protein; K14791 periodic tryptophan protein 1	SPBC1711.16	[S] KOG0270 WD40 repeat-containing protein	sp|Q9P775|YBEG_SCHPO	Uncharacterized WD repeat-containing protein C17D11.16 OS=Schizosaccharomyces pombe (strain 972 / ATCC 24843) GN=SPBC1711.16 PE=1 SV=1	--
Zoff015199	0	0	0	0	0	0	0	0	0	8	0	69	0	0	0	0	0	0	0	0	0	0.41	0	3.41	0.001	0.001	0.001	1.27333	0	1	10.3144	0.0736247	10.3144	0.0130395	0	1	gi|695392565|ref|XP_009520371.1|	hypothetical protein PHYSODRAFT_311727 [Phytophthora sojae]	pif:PITG_04499	histone deacetylase, putative; K06067 histone deacetylase 1/2 [EC:3.5.1.98]	Hs13128860	[B] KOG1342 Histone deacetylase complex, catalytic component RPD3	sp|P56517|HDAC1_CHICK	Histone deacetylase 1 OS=Gallus gallus GN=HDAC1 PE=2 SV=1	GO:0043044,histone deacetylase 1; GO:0000980,histone deacetylase 1; GO:0046969,histone deacetylase 1; GO:0000122,histone deacetylase 1; GO:0070932,histone deacetylase 1; GO:0042826,histone deacetylase 1; GO:0001103,histone deacetylase 1GO:0033613,histone deacetylase 1GO:0061647,histone deacetylase 1GO:0031492,histone deacetylase 1GO:0032041,histone deacetylase 1GO:0016581,histone deacetylase 1GO:…
Zoff015574	2	0	0	0	2.19	165	0	1	15.15	0	1	0	0.1	0	0	0	0.13	8.19	0	0.05	0.76	0	0.05	0	0.0333333	2.77333	0.27	0.0166667	6.37851	0.041032	-4.01792	1	-7.37851	0.0256981	3.01792	1	gi|261188588|ref|XP_002620708.1|	conserved hypothetical protein [Ajellomyces dermatitidis SLH14081]	act:ACLA_054900	hypothetical protein	--	--	--	--	--
Zoff015580	1.74	0	0	11.92	0	28	0	0	3.45	0	0	0	0.09	0	0	0.59	0	1.39	0	0	0.17	0	0	0	0.03	0.66	0.0566667	0.001	4.45943	0.122415	-5.82443	1	-9.36632	0.0341142	0.917538	1	gi|656918070|gb|KEF63648.1|	hypothetical protein A1O9_01626 [Exophiala aquamarina CBS 119918]	fgr:FG03725.1	hypothetical protein	SPAC11D3.05	[R] KOG0255 Synaptic vesicle transporter SVOP and related transporters (major facilitator superfamily)	sp|Q10084|MFS2_SCHPO	Uncharacterized transporter mfs2 OS=Schizosaccharomyces pombe (strain 972 / ATCC 24843) GN=mfs2 PE=3 SV=1	GO:0055085,mfs multidrug transporter; GO:0016021,mfs multidrug transporter
Zoff015817	0	0	0	12	7	4	0	0	1	6	4	3	0	0	0	0.59	0.4	0.2	0	0	0.05	0.3	0.21	0.15	0.001	0.396667	0.0166667	0.22	8.63178	0.0139869	3.72247	0.787625	-0.850424	1	4.05889	1	gi|576991312|gb|EUC64014.1|	choline-phosphate cytidylyltransferase [Rhizoctonia solani AG-3 Rhs1AP]	lbc:LACBIDRAFT_318954	cholinephosphate cytidylyltransferase; K00968 choline-phosphate cytidylyltransferase [EC:2.7.7.15]	At2g32260	[I] KOG2804 Phosphorylcholine transferase/cholinephosphate cytidylyltransferase	sp|Q9ZV56|CCT1_ARATH	Choline-phosphate cytidylyltransferase 1 OS=Arabidopsis thaliana GN=CCT1 PE=1 SV=1	GO:0009058,choline-phosphate cytidylyltransferase; GO:0016779,choline-phosphate cytidylyltransferase
Zoff015833	0	2	0	5	2	25	0	0	0	0	0	0	0	0.1	0	0.25	0.11	1.24	0	0	0	0	0	0	0.0333333	0.533333	0.001	0.001	4	0.115844	0	1	-9.05889	0.0272336	-5.05889	1	gi|628303928|ref|XP_007734419.1|	hypothetical protein A1O3_06109 [Capronia epimyces CBS 606.96]	--	--	--	--	--	--	--
Zoff015948	0	0	0	19	8	11	0	1	2	5	3	2	0	0	0	0.94	0.46	0.55	0	0.05	0.1	0.25	0.16	0.1	0.001	0.65	0.05	0.17	9.3443	0.000419277	1.76553	1	-1.9349	0.396742	5.64386	1	gi|576994589|gb|EUC67184.1|	RNA recognition motif protein [Rhizoctonia solani AG-3 Rhs1AP]	cci:CC1G_01689	hypothetical protein	7295256	[AR] KOG0109 RNA-binding protein LARK, contains RRM and retroviral-type Zn-finger domains	sp|Q94901|LARK_DROME	RNA-binding protein lark OS=Drosophila melanogaster GN=lark PE=1 SV=1	GO:0008270,rna recognition motif domain-containing protein; GO:0003676,rna recognition motif domain-containing protein; GO:0000166,rna recognition motif domain-containing protein
Zoff016005	4	4.33	3	41.38	12	57	2	0	41	2	1	0	0.2	0.22	0.15	2.04	0.69	2.83	0.1	0	2.06	0.1	0.05	0	0.19	1.85333	0.72	0.05	3.28605	0.000766022	-3.848	0.686854	-5.21205	0.000221346	1.922	1	gi|628278594|ref|XP_007731880.1|	ribosome biogenesis protein ERB1 [Capronia epimyces CBS 606.96]	cpw:CPC735_034810	WD domain, G-beta repeat containing protein; K14824 ribosome biogenesis protein ERB1	YMR049c	[J] KOG0650 WD40 repeat nucleolar protein Bop1, involved in ribosome biogenesis	sp|A6QX61|ERB1_AJECN	Ribosome biogenesis protein ERB1 OS=Ajellomyces capsulatus (strain NAm1 / WU24) GN=ERB1 PE=3 SV=2	GO:0005730,ribosome biogenesis protein erb1; GO:0005654,ribosome biogenesis protein erb1; GO:0000463,ribosome biogenesis protein erb1; GO:0000466,ribosome biogenesis protein erb1; GO:0043021,ribosome biogenesis protein erb1; GO:0030687,ribosome biogenesis protein erb1
Zoff016201	3.62	6.26	9	18.14	21.54	14	7.39	2.38	0	0	0	0	0.18	0.31	0.44	0.89	1.24	0.69	0.37	0.12	0	0	0	0	0.31	0.94	0.163333	0.001	1.60039	0.234374	-7.35168	1	-9.87652	0.000229373	-0.924449	1	gi|695081655|ref|XP_009388360.1|	PREDICTED: LRR receptor-like serine/threonine-protein kinase FLS2 [Musa acuminata subsp. malaccensis]	pop:POPTR_570620	hypothetical protein	At5g27060	[R] KOG0619 FOG: Leucine rich repeat	sp|Q9LP24|Y1571_ARATH	Probable leucine-rich repeat receptor-like protein kinase At1g35710 OS=Arabidopsis thaliana GN=At1g35710 PE=2 SV=1	--
Zoff016494	0	0	0	11	5	3	1	0	0	0	2	0	0	0	0	0.54	0.29	0.15	0.05	0	0	0	0.1	0	0.001	0.326667	0.0166667	0.0333333	8.35168	0.0390453	1	1	-3.29278	0.334838	4.05889	1	gi|470508554|ref|XP_004349593.1|	cullinassociated and neddylation-dissociated 1, putative [Acanthamoeba castellanii str. Neff]	zma:100383873	gpm596; LOC100383873	HsM8924260	[R] KOG1824 TATA-binding protein-interacting protein	sp|Q86KD1|CAND1_DICDI	Cullin-associated NEDD8-dissociated protein 1 OS=Dictyostelium discoideum GN=cand1 PE=3 SV=1	GO:0070062,cullin-associated nedd8-dissociated protein 1; GO:0048468,cullin-associated nedd8-dissociated protein 1; GO:0009628,cullin-associated nedd8-dissociated protein 1; GO:0010265,cullin-associated nedd8-dissociated protein 1; GO:0009790,cullin-associated nedd8-dissociated protein 1; GO:0009908,cullin-associated nedd8-dissociated protein 1; GO:0016567,cullin-associated nedd8-dissociated prot…
Zoff016497	1	1	3	4	3	53	0	1	1	1	0	0	0.05	0.05	0.15	0.2	0.17	2.63	0	0.05	0.05	0.05	0	0	0.0833333	1	0.0333333	0.0166667	3.58496	0.0887544	-1	1	-5.90689	0.0198779	-1.32193	1	gi|656912367|gb|KEF57949.1|	hypothetical protein A1O9_05871 [Exophiala aquamarina CBS 119918]	afm:AFUA_3G11990	C6 transcription factor (Mut3)	--	--	sp|P40467|ASG1_YEAST	Activator of stress genes 1 OS=Saccharomyces cerevisiae (strain ATCC 204508 / S288c) GN=ASG1 PE=1 SV=1	GO:0046872,c6 transcription factor; GO:0006355,c6 transcription factor; GO:0006366,c6 transcription factor
Zoff016582	0	0	0	0	0	0	0	0	0	4	0	47	0	0	0	0	0	0	0	0	0	0.2	0	2.32	0.001	0.001	0.001	0.84	0	1	9.71425	0.152926	9.71425	0.0405881	0	1	gi|695399903|ref|XP_009522387.1|	hypothetical protein PHYSODRAFT_298119 [Phytophthora sojae]	pif:PITG_10298	hypothetical protein	--	--	--	--	--
Zoff016654	0	1	0	1	1	50	0	1	1	0	0	0	0	0.05	0	0.05	0.06	2.48	0	0.05	0.05	0	0	0	0.0166667	0.863333	0.0333333	0.001	5.69488	0.0675393	-5.05889	1	-9.75377	0.0345226	1	1	gi|258575301|ref|XP_002541832.1|	conserved hypothetical protein [Uncinocarpus reesii 1704]	ure:UREG_01348	hypothetical protein	--	--	--	--	GO:0008152,pyridine nucleotide-disulphide oxidoreductase domain containing protein; GO:0016491,pyridine nucleotide-disulphide oxidoreductase domain containing protein
Zoff016657	0	0	0	2	0	53	2	0	1	1	4	1	0	0	0	0.1	0	2.63	0.1	0	0.05	0.05	0.21	0.05	0.001	0.91	0.05	0.103333	9.82972	0.0328982	1.04731	1	-3.13856	0.449211	5.64386	1	gi|628305332|ref|XP_007734612.1|	hypothetical protein A1O3_06302 [Capronia epimyces CBS 606.96]	bfu:BC1G_03047	hypothetical protein	YLL023c	[S] KOG4002 Uncharacterized integral membrane protein	sp|Q12164|POM33_YEAST	Pore membrane protein of 33 kDa OS=Saccharomyces cerevisiae (strain ATCC 204508 / S288c) GN=POM33 PE=1 SV=1	GO:0016021,endoplasmic reticulum protein
Zoff016717	4	3	2	16	5	59	0	2	15	0	0	0	0.2	0.15	0.1	0.79	0.29	2.93	0	0.1	0.76	0	0	0	0.15	1.33667	0.286667	0.001	3.15561	0.0278503	-8.16323	0.631027	-10.3844	0.000494467	0.934412	1	gi|656909846|gb|KEF55524.1|	hypothetical protein A1O9_08274 [Exophiala aquamarina CBS 119918]	ure:UREG_05720	hypothetical protein	--	--	sp|O34311|YKOW_BACSU	Signaling protein YkoW OS=Bacillus subtilis (strain 168) GN=ykoW PE=3 SV=2	--
Zoff016724	0	2	1	3	4	85	2	0	8	0	0	0	0	0.1	0.05	0.15	0.23	4.22	0.1	0	0.4	0	0	0	0.05	1.53333	0.166667	0.001	4.9386	0.0197609	-7.38082	1	-10.5825	0.00322278	1.73697	1	gi|628324603|ref|XP_007743137.1|	hypothetical protein A1O5_04340 [Cladophialophora psammophila CBS 110553]	ang:ANI_1_1428064	An07g00730; hypothetical protein	At2g47130	[R] KOG0725 Reductases with broad range of substrate specificities	sp|O80713|SDR3A_ARATH	Short-chain dehydrogenase reductase 3a OS=Arabidopsis thaliana GN=SDR3a PE=2 SV=1	GO:0008152,15-hydroxyprostaglandin dehydrogenase
Zoff017083	0	0	0	91	1	0	0	0	0	0	0	0	0	0	0	4.48	0.06	0	0	0	0	0	0	0	0.001	1.51333	0.001	0.001	10.5635	0.0211616	0	1	-10.5635	0.0266493	0	1	gi|160550139|gb|ABX44774.1|	putative 40S ribosomal protein RPS3 [Flustra foliacea]	nve:NEMVE_v1g158071	hypothetical protein ; K02985 small subunit ribosomal protein S3e	Hs15718687	[J] KOG3181 40S ribosomal protein S3	sp|Q0Z8U2|RS3_PIG	40S ribosomal protein S3 OS=Sus scrofa GN=RPS3 PE=1 SV=1	GO:0070062,ribosomal protein s3; GO:0005925,ribosomal protein s3; GO:0003735,ribosomal protein s3; GO:0007067,ribosomal protein s3; GO:0002181,ribosomal protein s3; GO:0071159,ribosomal protein s3; GO:0051301,ribosomal protein s3GO:0051018,ribosomal protein s3GO:0045738,ribosomal protein s3GO:0009790,ribosomal protein s3GO:0006414,ribosomal protein s3GO:0003729,ribosomal protein s3GO:0000737,ribo…
Zoff017147	1	2	0	2.5	9	64.21	0.5	2	10	0	0	0	0.05	0.1	0	0.12	0.52	3.19	0.03	0.1	0.5	0	0	0	0.05	1.27667	0.21	0.001	4.67431	0.0154497	-7.71425	0.724888	-10.3182	0.00256493	2.07039	1	gi|628294684|ref|XP_007757750.1|	hypothetical protein A1O7_05551 [Cladophialophora yegresii CBS 114405]	pcs:Pc13g06270	Pc13g06270; K06916	YEL052w	[R] KOG2383 Predicted ATPase	sp|P32317|AFG1_YEAST	Protein AFG1 OS=Saccharomyces cerevisiae (strain ATCC 204508 / S288c) GN=AFG1 PE=1 SV=1	GO:0005524,mitochondrial atpase protein; GO:0009058,mitochondrial atpase protein; GO:0016844,mitochondrial atpase protein
Zoff017166	0	0	0	2	1	29	1	0	3	0	0	0	0	0	0	0.1	0.06	1.44	0.05	0	0.15	0	0	0	0.001	0.533333	0.0666667	0.001	9.05889	0.044959	-6.05889	1	-9.05889	0.0622102	6.05889	1	gi|656909378|gb|KEF55074.1|	hypothetical protein A1O9_08727 [Exophiala aquamarina CBS 119918]	nfi:NFIA_011910	Fes/CIP4 homology domain protein	--	--	sp|P25623|SYP1_YEAST	Suppressor of yeast profilin deletion OS=Saccharomyces cerevisiae (strain ATCC 204508 / S288c) GN=SYP1 PE=1 SV=3	GO:0016491,fes cip4 homology domain-containing protein
Zoff017240	0	0	0	3	6	14	0	0	0	0	0	1	0	0	0	0.15	0.34	0.69	0	0	0	0	0	0.05	0.001	0.393333	0.001	0.0166667	8.61961	0.0213923	4.05889	1	-4.56071	0.101587	0	1	gi|671541771|ref|WP_031525398.1|	D-alanyl-D-alanine dipeptidase [Streptomyces sp. NRRL F-5123]	amd:AMED_0659	vanA; D-alanyl-D-alanine dipeptidase; K08641 D-alanyl-D-alanine dipeptidase [EC:3.4.13.22]	--	--	sp|Q47749|VANX_ENTFA	D-alanyl-D-alanine dipeptidase OS=Enterococcus faecalis (strain ATCC 700802 / V583) GN=vanXB PE=2 SV=2	GO:0008233,d-alanyl-d-alanine dipeptidase
Zoff017404	1	2	0	1	6	43	0	0	5	0	0	0	0.05	0.1	0	0.05	0.34	2.13	0	0	0.25	0	0	0	0.05	0.84	0.0833333	0.001	4.07039	0.085946	-6.38082	1	-9.71425	0.0152626	0.736966	1	gi|656916304|gb|KEF61883.1|	ubiquitin thiolesterase [Exophiala aquamarina CBS 119918]	ure:UREG_04485	similar to ubiquitin carboxyl-terminal hydrolase; K11843 ubiquitin carboxyl-terminal hydrolase 14 [EC:3.1.2.15]	SPAC6G9.08	[O] KOG1872 Ubiquitin-specific protease	sp|Q92353|UBP6_SCHPO	Ubiquitin carboxyl-terminal hydrolase 6 OS=Schizosaccharomyces pombe (strain 972 / ATCC 24843) GN=ubp6 PE=1 SV=2	GO:0036459,ubiquitin thiolesterase; GO:0006511,ubiquitin thiolesterase; GO:0008234,ubiquitin thiolesterase
Zoff017523	4	0	1	4	5	40	0	0	12	0	0	0	0.2	0	0.05	0.2	0.29	1.98	0	0	0.6	0	0	0	0.0833333	0.823333	0.2	0.001	3.30451	0.130909	-7.64386	1	-9.68533	0.00714584	1.26303	1	gi|656916032|gb|KEF61611.1|	hypothetical protein A1O9_03179 [Exophiala aquamarina CBS 119918]	act:ACLA_095460	RNA polymerase II Elongator subunit, putative; K11374 elongator complex protein 2	YGR200c	[BK] KOG1063 RNA polymerase II elongator complex, subunit ELP2, WD repeat superfamily	sp|P42935|ELP2_YEAST	Elongator complex protein 2 OS=Saccharomyces cerevisiae (strain ATCC 204508 / S288c) GN=ELP2 PE=1 SV=1	--
Zoff017863	0	0	0	1	0	0	2	0	2	19	0	180	0	0	0	0.05	0	0	0.1	0	0.1	0.96	0	8.9	0.001	0.0166667	0.0666667	3.28667	4.05889	1	5.62352	0.117018	7.62352	0.00719868	6.05889	1	gi|570333799|gb|ETO81747.1|	hypothetical protein, variant [Phytophthora parasitica P1976]	pif:PITG_00747	hydroxymethylglutaryl-CoA lyase, mitochondrial precursor	Hs4504427	[CE] KOG2368 Hydroxymethylglutaryl-CoA lyase	sp|P35915|HMGCL_CHICK	Hydroxymethylglutaryl-CoA lyase, mitochondrial OS=Gallus gallus GN=HMGCL PE=1 SV=1	GO:0015031,hydroxymethylglutaryl- mitochondrial; GO:0004419,hydroxymethylglutaryl- mitochondrial; GO:0008152,hydroxymethylglutaryl- mitochondrial
Zoff018028	0	0	1	17	8	3	0	1	1	4	3	3	0	0	0.05	0.84	0.46	0.15	0	0.05	0.05	0.2	0.16	0.15	0.0166667	0.483333	0.0333333	0.17	4.85798	0.0342251	2.3505	1	-1.50748	0.905255	1	1	gi|576981913|gb|EUC54656.1|	hypothetical protein RSOL_064060 [Rhizoctonia solani AG-3 Rhs1AP]	--	--	--	--	--	--	--
Zoff018044	0	0	0	0	0	0	0	0	0	2	0	57	0	0	0	0	0	0	0	0	0	0.1	0	2.82	0.001	0.001	0.001	0.973333	0	1	9.92679	0.153521	9.92679	0.0422077	0	1	gi|568010707|gb|ETL84890.1|	hypothetical protein L917_15410, partial [Phytophthora parasitica]	pif:PITG_09456	nitroreductase family, putative	--	--	sp|Q60049|NOX_THET8	NADH dehydrogenase OS=Thermus thermophilus (strain HB8 / ATCC 27634 / DSM 579) GN=nox PE=1 SV=2	GO:0016491,nitroreductase-like protein; GO:0055114,nitroreductase-like protein
Zoff018180	0	0	0	0	0	0	0	0	0	4	0	49	0	0	0	0	0	0	0	0	0	0.2	0	2.42	0.001	0.001	0.001	0.873333	0	1	9.77039	0.145766	9.77039	0.0371242	0	1	gi|675177737|ref|XP_008897753.1|	hypothetical protein PPTG_05782 [Phytophthora parasitica INRA-310]	pif:PITG_16483	hypothetical protein	At3g55950	[T] KOG1187 Serine/threonine protein kinase	sp|O80963|ACCR2_ARATH	Serine/threonine-protein kinase-like protein CCR2 OS=Arabidopsis thaliana GN=CCR2 PE=1 SV=1	--
Zoff018182	0	0	0	3	2	64	1	0	12	0	0	0	0	0	0	0.15	0.11	3.18	0.05	0	0.6	0	0	0	0.001	1.14667	0.216667	0.001	10.1632	0.00513379	-7.75933	0.884614	-10.1632	0.00898697	7.75933	1	gi|628341021|ref|XP_007747492.1|	cytochrome c oxidase subunit VIIc [Cladophialophora psammophila CBS 110553]	aor:AOR_1_1510144	cytochrome c subunit; K02272 cytochrome c oxidase subunit VIIc [EC:1.9.3.1]	--	--	--	--	GO:1902600,cytochrome c subunit; GO:0004129,cytochrome c subunit
Zoff018600	1	0	0	2	3	39	0	0	3	0	0	0	0.05	0	0	0.1	0.17	1.94	0	0	0.15	0	0	0	0.0166667	0.736667	0.05	0.001	5.46597	0.0364666	-5.64386	1	-9.52487	0.0207135	1.58496	1	gi|656918155|gb|KEF63733.1|	maintenance-ploidy protein MOB1 (MPS1 binder 1) [Exophiala aquamarina CBS 119918]	ani:AN6288.2	MOB1_NEUCR Probable maintenance of ploidy protein mob1; K06685 maintenance of ploidy protein MOB1 (MPS1 binder 1)	SPBC428.13c	[D] KOG0440 Cell cycle-associated protein Mob1-1	sp|Q9P601|MOB1_NEUCR	Probable maintenance of ploidy protein mob1 OS=Neurospora crassa (strain ATCC 24698 / 74-OR23-1A / CBS 708.71 / DSM 1257 / FGSC 987) GN=mob1-1 PE=3 SV=2	GO:0000921,maintenance of ploidy protein mob1; GO:0030428,maintenance of ploidy protein mob1; GO:0006874,maintenance of ploidy protein mob1; GO:0005816,maintenance of ploidy protein mob1; GO:0016310,maintenance of ploidy protein mob1; GO:0016301,maintenance of ploidy protein mob1; GO:0048315,maintenance of ploidy protein mob1
Zoff018792	16	39	20	17	12	11	4	13	14	1	0	0	0.79	1.95	0.99	0.84	0.69	0.55	0.2	0.64	0.71	0.05	0	0	1.24333	0.693333	0.516667	0.0166667	-0.842592	0.999027	-4.9542	0.168441	-5.37851	0.00558544	-1.26691	1	gi|695065731|ref|XP_009421463.1|	PREDICTED: probable pectinesterase/pectinesterase inhibitor 34 [Musa acuminata subsp. malaccensis]	ath:AT3G49220	pectinesterase family protein (EC:3.1.1.11)	--	--	sp|Q9M3B0|PME34_ARATH	Probable pectinesterase/pectinesterase inhibitor 34 OS=Arabidopsis thaliana GN=PME34 PE=2 SV=1	GO:0045330,probable pectinesterase pectinesterase inhibitor 34; GO:0042744,probable pectinesterase pectinesterase inhibitor 34; GO:0016021,probable pectinesterase pectinesterase inhibitor 34; GO:0030599,probable pectinesterase pectinesterase inhibitor 34; GO:0042545,probable pectinesterase pectinesterase inhibitor 34; GO:0009505,probable pectinesterase pectinesterase inhibitor 34; GO:0004857,prob…
Zoff018824	0	1	0	2	3	32	0	0	0	0	0	0	0	0.05	0	0.1	0.17	1.59	0	0	0	0	0	0	0.0166667	0.62	0.001	0.001	5.21723	0.0517465	0	1	-9.27612	0.0286428	-4.05889	1	gi|584411737|emb|CDM30501.1|	26S proteasome complex ubiquitin receptor, subunit Rpn13 [Penicillium roqueforti FM164]	pcs:Pc13g08890	Pc13g08890	7303250	[R] KOG3037 Cell membrane glycoprotein	sp|Q7ZXD6|ADM1B_XENLA	Proteasomal ubiquitin receptor ADRM1-B OS=Xenopus laevis GN=adrm1-b PE=2 SV=1	GO:0005634,26s proteasome complex ubiquitin subunit rpn13; GO:0005737,26s proteasome complex ubiquitin subunit rpn13
Zoff019176	74	72	75	44	61	43	16	17	47	7	8	2	3.64	3.61	3.7	2.17	3.5	2.13	0.81	0.84	2.37	0.36	0.41	0.1	3.65	2.6	1.34	0.29	-0.489385	1	-2.20811	0.44227	-3.16439	0.00247125	-1.44566	0.932932	gi|695002181|ref|XP_009420349.1|	PREDICTED: ubiquinol oxidase 2, mitochondrial-like [Musa acuminata subsp. malaccensis]	vvi:100233056	AOX2; mitochondrial alternative oxidase 2	--	--	sp|Q41224|AOX1_TOBAC	Ubiquinol oxidase 1, mitochondrial OS=Nicotiana tabacum GN=AOX1 PE=1 SV=1	GO:0046872,ubiquinol oxidase mitochondrial-like; GO:0005743,ubiquinol oxidase mitochondrial-like; GO:0070469,ubiquinol oxidase mitochondrial-like; GO:0009916,ubiquinol oxidase mitochondrial-like; GO:0010230,ubiquinol oxidase mitochondrial-like; GO:0016021,ubiquinol oxidase mitochondrial-like
Zoff019342	0	0	1	46	3	14	0	0	3	0	2	0	0	0	0.05	2.26	0.17	0.69	0	0	0.15	0	0.1	0	0.0166667	1.04	0.05	0.0333333	5.96347	0.00210816	-0.584963	1	-4.96347	0.0165673	1.58496	1	gi|576986671|gb|EUC59407.1|	small GTPase family Rab protein [Rhizoctonia solani AG-3 Rhs1AP]	scm:SCHCODRAFT_81164	hypothetical protein	Hs7706675	[U] KOG0094 GTPase Rab6/YPT6/Ryh1, small G protein superfamily	sp|P61294|RAB6B_MOUSE	Ras-related protein Rab-6B OS=Mus musculus GN=Rab6b PE=1 SV=1	GO:0005525,gtp binding protein; GO:0007264,gtp binding protein; GO:0015031,gtp binding protein
Zoff019451	3	5	2	0	0	1	0	0	0	6	11	9	0.15	0.25	0.1	0	0	0.05	0	0	0	0.3	0.57	0.44	0.166667	0.0166667	0.001	0.436667	-3.32193	0.627723	8.77039	0.0966828	4.71149	0.0408111	-7.38082	0.914412	gi|628242048|ref|XP_007723771.1|	hypothetical protein A1O1_04692 [Capronia coronata CBS 617.96]	ang:ANI_1_1054024	An02g07570; protein KES1	YPL145c	[T] KOG2210 Oxysterol-binding protein	sp|P35844|KES1_YEAST	Protein KES1 OS=Saccharomyces cerevisiae (strain ATCC 204508 / S288c) GN=KES1 PE=1 SV=1	--
Zoff019458	3	2	1	17	3	10	2	3	17	0	0	1	0.15	0.1	0.05	0.84	0.17	0.5	0.1	0.15	0.86	0	0	0.05	0.1	0.503333	0.37	0.0166667	2.33151	0.292252	-4.47249	0.490033	-4.91648	0.0448638	1.88753	1	gi|628323636|ref|XP_007742949.1|	hypothetical protein A1O5_04151 [Cladophialophora psammophila CBS 110553]	fgr:FG11180.1	hypothetical protein	--	--	--	--	--
Zoff019464	0	3	3	14	2	106	1	2	18	0	1	0	0	0.15	0.15	0.69	0.11	5.26	0.05	0.1	0.91	0	0.05	0	0.1	2.02	0.353333	0.0166667	4.33628	0.0246638	-4.40599	0.647418	-6.92125	0.00324344	1.82103	1	gi|628344347|ref|XP_007748550.1|	hypothetical protein A1O5_09782 [Cladophialophora psammophila CBS 110553]	pcs:Pc20g08440	Pc20g08440	SPAC11E3.11c	[U] KOG0929 Guanine nucleotide exchange factor	sp|O13690|YDYB_SCHPO	PH and SEC7 domain-containing protein C11E3.11c OS=Schizosaccharomyces pombe (strain 972 / ATCC 24843) GN=SPAC11E3.11c PE=3 SV=1	GO:0044763,sec7 domain protein; GO:0050794,sec7 domain protein
Zoff019563	3	1	1	0	1	4	3	2	3	132	5	1929	0.15	0.05	0.05	0	0.06	0.2	0.15	0.1	0.15	6.7	0.26	95.37	0.0833333	0.0866667	0.133333	34.11	0.0565835	1	7.99901	0.00724841	8.6205	0.000347675	0.678072	1	gi|695435014|ref|XP_009531565.1|	hypothetical protein PHYSODRAFT_286746 [Phytophthora sojae]	pif:PITG_14850	40S ribosomal protein S7; K02993 small subunit ribosomal protein S7e	At1g48830	[J] KOG3320 40S ribosomal protein S7	sp|Q9ZNS1|RS7_AVIMR	40S ribosomal protein S7 OS=Avicennia marina GN=RPS7 PE=2 SV=1	GO:0006364,40s ribosomal protein s7; GO:0019843,40s ribosomal protein s7; GO:0003735,40s ribosomal protein s7; GO:0002181,40s ribosomal protein s7; GO:0022627,40s ribosomal protein s7; GO:0030686,40s ribosomal protein s7; GO:0042274,40s ribosomal protein s7GO:0032040,40s ribosomal protein s7GO:0009507,40s ribosomal protein s7
Zoff019565	0	0	0	1	0	0	0	0	1	4	0	80	0	0	0	0.05	0	0	0	0	0.05	0.2	0	3.96	0.001	0.0166667	0.0166667	1.38667	4.05889	1	6.37851	0.153336	6.37851	0.0417996	4.05889	1	gi|675197443|ref|XP_008907606.1|	2-isopropylmalate synthase [Phytophthora parasitica INRA-310]	pif:PITG_03738	2-isopropylmalate synthase	At1g74040	[E] KOG2367 Alpha-isopropylmalate synthase/homocitrate synthase	sp|B7KJX8|LEU1_CYAP7	2-isopropylmalate synthase OS=Cyanothece sp. (strain PCC 7424) GN=leuA PE=3 SV=1	GO:0003852,2-isopropylmalate synthase; GO:0009098,2-isopropylmalate synthase
Zoff019603	0	0	0	10.2	0	30	0	0	4	0	1	0	0	0	0	0.5	0	1.49	0	0	0.2	0	0.05	0	0.001	0.663333	0.0666667	0.0166667	9.37359	0.0221292	-2	1	-5.3147	0.0920865	6.05889	1	gi|198415070|ref|XP_002128780.1|	PREDICTED: 60S ribosomal protein L13-like [Ciona intestinalis]	cin:100184047	similar to ribosomal protein L13; K02873 large subunit ribosomal protein L13e	7297588	[J] KOG3295 60S Ribosomal protein L13	sp|P41126|RL13_DROME	60S ribosomal protein L13 OS=Drosophila melanogaster GN=RpL13 PE=1 SV=1	GO:0030529,60s ribosomal protein l13-like
Zoff019632	0	0	0	6	1	69	0	0	3	0	3	0	0	0	0	0.3	0.06	3.42	0	0	0.15	0	0.16	0	0.001	1.26	0.05	0.0533333	10.2992	0.00372703	0.0931094	1	-4.56224	0.0799481	5.64386	1	gi|656909210|gb|KEF54920.1|	3-oxoacyl-[acyl-carrier protein] reductase [Exophiala aquamarina CBS 119918]	nfi:NFIA_054820	oxidoreductase, short-chain dehydrogenase/reductase family	7296705	[R] KOG0725 Reductases with broad range of substrate specificities	sp|P94681|TSAC_COMTE	4-formylbenzenesulfonate dehydrogenase TsaC1/TsaC2 OS=Comamonas testosteroni GN=tsaC1 PE=1 SV=1	GO:0004316,short-chain dehydrogenase reductase family; GO:0000166,short-chain dehydrogenase reductase family; GO:0055114,short-chain dehydrogenase reductase family
Zoff019677	1	0	0	3	0	52	0	0	15	0	0	0	0.05	0	0	0.15	0	2.58	0	0	0.76	0	0	0	0.0166667	0.91	0.253333	0.001	5.77083	0.0665504	-7.98489	1	-9.82972	0.038609	3.926	1	gi|684157172|ref|XP_009152464.1|	proteasome subunit beta type-2 [Exophiala dermatitidis NIH/UT8656]	ssl:SS1G_05630	hypothetical protein ; K02734 20S proteasome subunit beta 4 [EC:3.4.25.1]	YER012w	[O] KOG0177 20S proteasome, regulatory subunit beta type PSMB2/PRE1	sp|Q9P6U7|PSB4_NEUCR	Probable proteasome subunit beta type-4 OS=Neurospora crassa (strain ATCC 24698 / 74-OR23-1A / CBS 708.71 / DSM 1257 / FGSC 987) GN=pcb-4 PE=3 SV=2	GO:0005737,proteasome subunit beta type-2; GO:0005839,proteasome subunit beta type-2; GO:0005634,proteasome subunit beta type-2; GO:0004298,proteasome subunit beta type-2; GO:0051603,proteasome subunit beta type-2
Zoff019707	0	0	1	1.13	3	28	0	0	0	0	0	0	0	0	0.05	0.06	0.17	1.39	0	0	0	0	0	0	0.0166667	0.54	0.001	0.001	5.01792	0.093681	0	1	-9.07682	0.0464522	-4.05889	1	gi|656914480|gb|KEF60060.1|	hypothetical protein A1O9_04910 [Exophiala aquamarina CBS 119918]	pno:SNOG_04574	hypothetical protein	--	--	--	--	--
Zoff019730	0	0	0	0	0	0	0	0	0	2	0	59	0	0	0	0	0	0	0	0	0	0.1	0	2.92	0.001	0.001	0.001	1.00667	0	1	9.97537	0.148096	9.97537	0.0402587	0	1	gi|675190211|ref|XP_008903990.1|	hypothetical protein PPTG_09952 [Phytophthora parasitica INRA-310]	pif:PITG_21316	protein phosphatase methylesterase, putative; K13617 protein phosphatase methylesterase 1 [EC:3.1.1.-]	CE26705	[R] KOG2564 Predicted acetyltransferases and hydrolases with the alpha/beta hydrolase fold	sp|Q9BIB3|PPME1_CAEEL	Probable protein phosphatase methylesterase 1 OS=Caenorhabditis elegans GN=B0464.9 PE=3 SV=1	GO:0044238,protein phosphatase methylesterase; GO:0044763,protein phosphatase methylesterase; GO:0044710,protein phosphatase methylesterase; GO:0044260,protein phosphatase methylesterase; GO:0016787,protein phosphatase methylesterase
Zoff020192	0	0	0	23	0	8	0	0	1	3	1	1	0	0	0	1.13	0	0.4	0	0	0.05	0.15	0.05	0.05	0.001	0.51	0.0166667	0.0833333	8.99435	0.0450799	2.32193	1	-2.61353	0.583015	4.05889	1	gi|576980849|gb|EUC53592.1|	Tim44 domain protein [Rhizoctonia solani AG-3 Rhs1AP]	vcn:VOLCADRAFT_106869	hypothetical protein	--	--	--	--	--
Zoff020197	0	5	1	0	0	1	2	2	0	9	20	9	0	0.25	0.05	0	0	0.05	0.1	0.1	0	0.46	1.03	0.44	0.1	0.0166667	0.0666667	0.643333	-2.58496	1	3.27053	0.313006	5.27053	0.0108663	-0.584963	1	gi|628270879|ref|XP_007730897.1|	hypothetical protein A1O3_02567 [Capronia epimyces CBS 606.96]	nfi:NFIA_055010	hypothetical protein	--	--	--	--	--
Zoff020227	0	0	0	14	3	6	0	0	0	0	3	0	0	0	0	0.69	0.17	0.3	0	0	0	0	0.16	0	0.001	0.386667	0.001	0.0533333	8.59495	0.0197751	5.73697	1	-2.85798	0.392781	0	1	gi|471896447|emb|CCO31100.1|	E3 SUMO-protein ligase nse2 [Rhizoctonia solani AG-1 IB]	ppl:POSPLDRAFT_95822	hypothetical protein	SPAC16A10.06c	[R] KOG2979 Protein involved in DNA repair	sp|Q4PIR3|NSE2_SCHPO	E3 SUMO-protein ligase nse2 OS=Schizosaccharomyces pombe (strain 972 / ATCC 24843) GN=nse2 PE=1 SV=3	GO:0008152,e3 sumo-protein ligase; GO:0003824,e3 sumo-protein ligase
Zoff020267	0	0	0	18.81	1	6	0	0	1	14	5	1	0	0	0	0.93	0.06	0.3	0	0	0.05	0.71	0.26	0.05	0.001	0.43	0.0166667	0.34	8.74819	0.0377811	4.3505	0.570533	-0.338802	1	4.05889	1	gi|660971237|gb|KEP54907.1|	putative BAR adaptor protein [Rhizoctonia solani 123E]	lbc:LACBIDRAFT_186940	hypothetical protein	SPBC21D10.12	[U] KOG3771 Amphiphysin	sp|Q59LF3|RV167_CANAL	Regulator of cytoskeleton and endocytosis RVS167 OS=Candida albicans (strain SC5314 / ATCC MYA-2876) GN=RVS167 PE=3 SV=1	GO:0005737,bar-domain-containing protein
Zoff020295	218.64	339.13	157.71	134.55	287.27	541.3	676.97	293.59	430.47	61.74	55.05	43.16	10.76	16.99	7.78	6.62	16.5	26.86	34.23	14.54	21.68	3.13	2.85	2.13	11.8433	16.66	23.4833	2.70333	0.492313	1	-3.11883	0.0177402	-2.62358	0.00586115	0.987562	1	gi|695036420|ref|XP_009405666.1|	PREDICTED: fasciclin-like arabinogalactan protein 12 [Musa acuminata subsp. malaccensis]	sbi:SORBI_03g030690	hypothetical protein	--	--	sp|Q9SIL7|FLA6_ARATH	Fasciclin-like arabinogalactan protein 6 OS=Arabidopsis thaliana GN=FLA6 PE=2 SV=2	GO:0016020,fasciclin-like arabinogalactan protein 9
Zoff020296	469.36	702.87	603.29	398.45	602.73	1000.7	1826.03	715.41	1146.53	149.26	92.95	111.84	23.1	35.22	29.78	19.61	34.62	49.65	92.34	35.43	57.74	7.57	4.81	5.53	29.3667	34.6267	61.8367	5.97	0.237704	1	-3.37266	0.00864727	-2.53608	0.00226128	1.07428	1	gi|695036420|ref|XP_009405666.1|	PREDICTED: fasciclin-like arabinogalactan protein 12 [Musa acuminata subsp. malaccensis]	sbi:SORBI_03g030690	hypothetical protein	--	--	sp|Q9SIL7|FLA6_ARATH	Fasciclin-like arabinogalactan protein 6 OS=Arabidopsis thaliana GN=FLA6 PE=2 SV=2	GO:0016020,fasciclin-like arabinogalactan protein 9
Zoff020311	8.29	8.65	3.66	0	0	0	10.01	9.95	13.31	35.88	3.87	15.37	0.41	0.43	0.18	0	0	0	0.51	0.49	0.67	1.82	0.2	0.76	0.34	0.001	0.556667	0.926667	-8.40939	0.0246366	0.735237	1	9.85591	0.00209499	0.711279	1	gi|672144092|ref|XP_008795939.1|	PREDICTED: isoflavone reductase-like protein [Phoenix dactylifera]	osa:4341019	Os06g0472200	--	--	sp|P52578|IFRH_SOLTU	Isoflavone reductase homolog OS=Solanum tuberosum PE=2 SV=1	GO:0005739,isoflavone reductase-like protein
Zoff020312	26.71	43.35	21.34	4	1	0	29.84	28.79	31.69	28.12	18.72	41.35	1.31	2.17	1.05	0.2	0.06	0	1.51	1.43	1.6	1.43	0.97	2.04	1.51	0.0866667	1.51333	1.48	-4.12293	3.66e-05	-0.0321326	1	4.09398	0.00134348	0.00318125	1	gi|672144092|ref|XP_008795939.1|	PREDICTED: isoflavone reductase-like protein [Phoenix dactylifera]	osa:4341019	Os06g0472200	--	--	sp|E1U332|ALL12_OLEEU	Isoflavone reductase-like protein OS=Olea europaea PE=1 SV=1	GO:0005739,isoflavone reductase-like protein
Zoff020313	154	245	182	98	91	40	32	27	19	29	94	38	7.58	12.28	8.98	4.82	5.23	1.98	1.62	1.34	0.96	1.47	4.86	1.88	9.61333	4.01	1.30667	2.73667	-1.26143	0.204641	1.06653	1	-0.551183	1	-2.87915	0.0119225	gi|695008352|ref|XP_009390766.1|	PREDICTED: amino acid permease 4-like [Musa acuminata subsp. malaccensis]	pop:POPTR_818545	PtrAAP3; amino acid permease	At5g63850	[E] KOG1303 Amino acid transporters	sp|Q9FN04|AAP4_ARATH	Amino acid permease 4 OS=Arabidopsis thaliana GN=AAP4 PE=1 SV=1	GO:0016021,amino acid permease 3-like
Zoff020400	0	0	0	18	3	3	0	0	0	7.48	1	0	0	0	0	0.89	0.17	0.15	0	0	0	0.38	0.05	0	0.001	0.403333	0.001	0.143333	8.65583	0.0334323	7.16323	1	-1.4926	1	0	1	gi|471912300|emb|CCO27285.1|	hypothetical protein BN14_01321 [Rhizoctonia solani AG-1 IB]	lbc:LACBIDRAFT_244860	hypothetical protein; K00861 riboflavin kinase [EC:2.7.1.26]	SPCC18.16c	[H] KOG3110 Riboflavin kinase	sp|O74866|RIFK_SCHPO	Riboflavin kinase OS=Schizosaccharomyces pombe (strain 972 / ATCC 24843) GN=fmn1 PE=1 SV=1	GO:0008531,riboflavin kinase; GO:0009231,riboflavin kinase; GO:0016310,riboflavin kinase
Zoff020434	0	0	0	156	0	0	0	0	0	0	0	1	0	0	0	7.68	0	0	0	0	0	0	0	0.05	0.001	2.56	0.001	0.0166667	11.3219	0.0259463	4.05889	1	-7.26303	0.0672793	0	1	gi|675366645|gb|KFM59547.1|	Pancreatic triacylglycerol lipase, partial [Stegodyphus mimosarum]	isc:IscW_ISCW015293	lipase precursor, putative (EC:3.1.1.3); K01046 triacylglycerol lipase [EC:3.1.1.3]	--	--	sp|Q6P8U6|LIPP_MOUSE	Pancreatic triacylglycerol lipase OS=Mus musculus GN=Pnlip PE=1 SV=1	GO:0003824,pancreatic triacylglycerol lipase-like
Zoff020653	0	1	0	3	1	43	1	0	10	1	0	0	0	0.05	0	0.15	0.06	2.13	0.05	0	0.5	0.05	0	0	0.0166667	0.78	0.183333	0.0166667	5.54844	0.0479686	-3.45943	1	-5.54844	0.0657279	3.45943	1	gi|656915697|gb|KEF61276.1|	hypothetical protein A1O9_02841 [Exophiala aquamarina CBS 119918]	--	--	--	--	--	--	--
Zoff020696	0	0	0	7	1	35	1	0	5	1	0	0	0	0	0	0.34	0.06	1.74	0.05	0	0.25	0.05	0	0	0.001	0.713333	0.1	0.0166667	9.47843	0.0104446	-2.58496	1	-5.41954	0.0500292	6.64386	1	gi|628328665|ref|XP_007743929.1|	hypothetical protein A1O5_05136 [Cladophialophora psammophila CBS 110553]	fgr:FG10490.1	hypothetical protein	--	--	--	--	--
Zoff020711	0	0	0	0	0	0	0	0	0	4	0	41	0	0	0	0	0	0	0	0	0	0.2	0	2.03	0.001	0.001	0.001	0.743333	0	1	9.53787	0.178927	9.53787	0.0485297	0	1	gi|301106300|ref|XP_002902233.1|	tRNA(Ile)-lysidine synthase, putative [Phytophthora infestans T30-4]	pif:PITG_10444	tRNA(Ile)-lysidine synthase, putative	--	--	sp|Q9PL79|TILS_CHLMU	tRNA(Ile)-lysidine synthase OS=Chlamydia muridarum (strain MoPn / Nigg) GN=tilS PE=3 SV=1	GO:0000166,trna -lysidine synthetase
Zoff020815	0	0	0	0	0	0	0	0	0	6	0	57	0	0	0	0	0	0	0	0	0	0.3	0	2.82	0.001	0.001	0.001	1.04	0	1	10.0224	0.103418	10.0224	0.0221804	0	1	gi|675187903|ref|XP_008902836.1|	hypothetical protein PPTG_09577 [Phytophthora parasitica INRA-310]	pif:PITG_16114	myb-like DNA-binding protein, putative	At5g11050	[K] KOG0048 Transcription factor, Myb superfamily	sp|P01104|MYB_AVIMB	Transforming protein Myb OS=Avian myeloblastosis virus GN=V-MYB PE=1 SV=2	GO:0005737,#NAME?; GO:0019509,#NAME?; GO:0016311,#NAME?; GO:0003677,#NAME?; GO:0003682,#NAME?; GO:0000287,#NAME?; GO:0043874,#NAME?GO:0016829,#NAME?
Zoff020885	19.84	4.35	11.57	51.89	27.79	31.77	10.37	6.77	0	3.61	11.38	3.45	0.98	0.22	0.57	2.55	1.6	1.58	0.52	0.34	0	0.18	0.59	0.17	0.59	1.91	0.286667	0.313333	1.69479	0.12593	0.128324	1	-2.6078	0.0207521	-1.04134	1	gi|672158303|ref|XP_008798887.1|	PREDICTED: homeobox-leucine zipper protein HAT22-like [Phoenix dactylifera]	pop:POPTR_718007	hypothetical protein	At4g37790	[K] KOG0483 Transcription factor HEX, contains HOX and HALZ domains	sp|P46604|HAT22_ARATH	Homeobox-leucine zipper protein HAT22 OS=Arabidopsis thaliana GN=HAT22 PE=1 SV=1	GO:0006355,homeobox-leucine zipper protein hox19-like; GO:0003700,homeobox-leucine zipper protein hox19-like; GO:0043565,homeobox-leucine zipper protein hox19-like; GO:0005634,homeobox-leucine zipper protein hox19-like
Zoff020886	16.16	20.65	23.43	40.11	24.21	28.23	26.63	10.23	12	2.39	5.62	4.55	0.8	1.03	1.16	1.97	1.39	1.4	1.35	0.51	0.6	0.12	0.29	0.22	0.996667	1.58667	0.82	0.21	0.670816	1	-1.96523	0.778255	-2.91754	0.00591278	-0.281487	1	gi|672158303|ref|XP_008798887.1|	PREDICTED: homeobox-leucine zipper protein HAT22-like [Phoenix dactylifera]	pop:POPTR_718007	hypothetical protein	At4g37790	[K] KOG0483 Transcription factor HEX, contains HOX and HALZ domains	sp|P46604|HAT22_ARATH	Homeobox-leucine zipper protein HAT22 OS=Arabidopsis thaliana GN=HAT22 PE=1 SV=1	GO:0006355,homeobox-leucine zipper protein hox19-like; GO:0003700,homeobox-leucine zipper protein hox19-like; GO:0043565,homeobox-leucine zipper protein hox19-like; GO:0005634,homeobox-leucine zipper protein hox19-like
Zoff020904	0	6	3	11	1	38	2	0	6	0	1	0	0	0.3	0.15	0.54	0.06	1.89	0.1	0	0.3	0	0.05	0	0.15	0.83	0.133333	0.0166667	2.46815	0.451649	-3	1	-5.63807	0.0280249	-0.169925	1	gi|656913361|gb|KEF58941.1|	hypothetical protein A1O9_03784 [Exophiala aquamarina CBS 119918]	bfu:BC1G_01140	hypothetical protein ; K00737 beta-1,4-mannosyl-glycoprotein beta-1,4-N-acetylglucosaminyltransferase [EC:2.4.1.144]	--	--	sp|Q09327|MGAT3_HUMAN	Beta-1,4-mannosyl-glycoprotein 4-beta-N-acetylglucosaminyltransferase OS=Homo sapiens GN=MGAT3 PE=2 SV=3	GO:0003830,glycosyl transferase family 17 protein; GO:0016020,glycosyl transferase family 17 protein; GO:0006487,glycosyl transferase family 17 protein
Zoff020936	0	0	0	17	8	8	1	0	1	1	0	1	0	0	0	0.84	0.46	0.4	0.05	0	0.05	0.05	0	0.05	0.001	0.566667	0.0333333	0.0333333	9.14636	0.00133145	0	1	-4.08746	0.0359141	5.05889	1	gi|639555916|gb|KDN34308.1|	hypothetical protein RSAG8_12602, partial [Rhizoctonia solani AG-8 WAC10335]	cci:CC1G_13192	sterol carrier protein 2; K08764 sterol carrier protein 2 [EC:2.3.1.176]	7298493_1	[I] KOG1406 Peroxisomal 3-ketoacyl-CoA-thiolase P-44/SCP2	sp|O62742|NLTP_RABIT	Non-specific lipid-transfer protein OS=Oryctolagus cuniculus GN=SCP2 PE=1 SV=1	GO:0016747,thiolase-like protein; GO:0008152,thiolase-like protein
Zoff021022	0.26	29	0.54	1.29	10	6	0.4	0.18	0.29	32	36.65	26	0.01	1.45	0.03	0.06	0.57	0.3	0.02	0.01	0.01	1.62	1.9	1.29	0.496667	0.31	0.0133333	1.60333	-0.68001	1	6.90989	0.00264218	2.37073	0.0631638	-5.21917	0.78065	gi|628264218|ref|XP_007730387.1|	hypothetical protein A1O3_02054 [Capronia epimyces CBS 606.96]	cpw:CPC735_068270	hypothetical protein	--	--	--	--	--
Zoff021074	0	0	0	6	0	38	0	0	13	0	0	0	0	0	0	0.3	0	1.89	0	0	0.65	0	0	0	0.001	0.73	0.216667	0.001	9.51175	0.0259607	-7.75933	1	-9.51175	0.0396935	7.75933	1	gi|656905567|gb|KEF51316.1|	26S proteasome regulatory subunit rpn-8 [Exophiala aquamarina CBS 119918]	pcs:Pc12g05300	Pc12g05300; K03038 26S proteasome regulatory subunit N8	SPCC1682.10	[O] KOG1556 26S proteasome regulatory complex, subunit RPN8/PSMD7	sp|Q8WZY4|RPN8_NEUCR	26S proteasome regulatory subunit rpn-8 OS=Neurospora crassa (strain ATCC 24698 / 74-OR23-1A / CBS 708.71 / DSM 1257 / FGSC 987) GN=rpn-8 PE=3 SV=1	GO:0000502,26s proteasome regulatory subunit rpn-8
Zoff021080	0	0	0	13	4	14	0	0	0	10	0	4	0	0	0	0.64	0.23	0.69	0	0	0	0.51	0	0.2	0.001	0.52	0.001	0.236667	9.02237	0.00292105	7.88671	0.686615	-1.13566	1	0	1	gi|471903752|emb|CCO29436.1|	hypothetical protein BN14_03449 [Rhizoctonia solani AG-1 IB]	cci:CC1G_07410	hypothetical protein	SPBC106.07c	[S] KOG4526 Predicted membrane protein	sp|Q9URV4|YBL7_SCHPO	Uncharacterized protein C106.07c OS=Schizosaccharomyces pombe (strain 972 / ATCC 24843) GN=SPBC106.07c PE=4 SV=1	GO:0016021,n alpha-acetylation-like protein
Zoff021081	117	60	60	43	23	18	63	67	68	350	70	674	5.76	3.01	2.96	2.12	1.32	0.89	3.19	3.32	3.42	17.75	3.62	33.32	3.91	1.44333	3.31	18.23	-1.43776	0.149754	2.46141	0.194453	3.65884	0.0013806	-0.240337	1	gi|695059899|ref|XP_009418323.1|	PREDICTED: arginine decarboxylase-like [Musa acuminata subsp. malaccensis]	sbi:SORBI_10g002070	hypothetical protein; K01583 arginine decarboxylase [EC:4.1.1.19]	At3g14390	[E] KOG0622 Ornithine decarboxylase	sp|Q9SNN0|SPE1_ORYSJ	Arginine decarboxylase 1 OS=Oryza sativa subsp. japonica GN=ADC1 PE=1 SV=1	GO:0006979,arginine decarboxylase-like; GO:0009446,arginine decarboxylase-like; GO:0048316,arginine decarboxylase-like; GO:0008295,arginine decarboxylase-like; GO:0006527,arginine decarboxylase-like; GO:0009651,arginine decarboxylase-like; GO:0009409,arginine decarboxylase-likeGO:0008792,arginine decarboxylase-like
Zoff021084	0	0	0	0	0	0	0	0	1	7	0	38	0	0	0	0	0	0	0	0	0.05	0.36	0	1.88	0.001	0.001	0.0166667	0.746667	0	1	5.48543	0.285079	9.54432	0.036649	4.05889	1	gi|675214235|ref|XP_008916002.1|	hypothetical protein PPTG_19355 [Phytophthora parasitica INRA-310]	pif:PITG_16648	hypothetical protein	--	--	--	--	--
Zoff021360	5	0	4	1	2	0	8	3	4	62.84	26.99	32.26	0.25	0	0.2	0.05	0.11	0	0.4	0.15	0.2	3.19	1.4	1.59	0.15	0.0533333	0.25	2.06	-1.49185	1	3.04264	0.079795	5.27146	3.61e-05	0.736966	1	gi|17644123|gb|AAL38986.1|	cytochrome P450-3 [Musa acuminata]	rcu:RCOM_0520560	cytochrome P450, putative (EC:1.14.13.68)	At1g13110	[Q] KOG0156 Cytochrome P450 CYP2 subfamily	sp|P24465|C71A1_PERAE	Cytochrome P450 71A1 OS=Persea americana GN=CYP71A1 PE=1 SV=2	GO:0005506,cytochrome p450 71a1-like; GO:0016709,cytochrome p450 71a1-like; GO:0020037,cytochrome p450 71a1-like; GO:0031090,cytochrome p450 71a1-like; GO:0005783,cytochrome p450 71a1-like; GO:0044425,cytochrome p450 71a1-like; GO:0055114,cytochrome p450 71a1-like
Zoff021361	8.89	2	3	0	1	2	3	9	20	59.81	16	63.3	0.44	0.1	0.15	0	0.06	0.1	0.15	0.45	1.01	3.03	0.83	3.13	0.23	0.0533333	0.536667	2.33	-2.10852	0.836515	2.11823	0.521078	5.44915	5.84e-05	1.22239	1	gi|17644123|gb|AAL38986.1|	cytochrome P450-3 [Musa acuminata]	rcu:RCOM_0520560	cytochrome P450, putative (EC:1.14.13.68)	At1g13110	[Q] KOG0156 Cytochrome P450 CYP2 subfamily	sp|P24465|C71A1_PERAE	Cytochrome P450 71A1 OS=Persea americana GN=CYP71A1 PE=1 SV=2	GO:0005506,cytochrome p450 71a1-like; GO:0016709,cytochrome p450 71a1-like; GO:0020037,cytochrome p450 71a1-like; GO:0031090,cytochrome p450 71a1-like; GO:0005783,cytochrome p450 71a1-like; GO:0044425,cytochrome p450 71a1-like; GO:0055114,cytochrome p450 71a1-like
Zoff021396	0	0	2	0	0	0	1	1	1	50	0	490.51	0	0	0.1	0	0	0	0.05	0.05	0.05	2.54	0	24.25	0.0333333	0.001	0.05	8.93	-5.05889	1	7.48059	0.0309781	13.1244	0.000875738	0.584963	1	gi|635371398|emb|CCI40553.1|	unnamed protein product [Albugo candida]	pti:PHATRDRAFT_36600	hypothetical protein; K02266 cytochrome c oxidase subunit VIa [EC:1.9.3.1]	At4g37830	[C] KOG3469 Cytochrome c oxidase, subunit VIa/COX13	--	--	GO:0044424,cytochrome c oxidase subunit mitochondrial-like
Zoff021649	1	2.5	0	0	0	5	1	1.67	1.5	121.74	5	1829.16	0.05	0.13	0	0	0	0.25	0.05	0.08	0.08	6.18	0.26	90.43	0.06	0.0833333	0.07	32.29	0.473931	1	8.84952	0.00435379	8.59798	0.000951292	0.222392	1	gi|568040233|gb|ETM37694.1|	hypothetical protein L914_15819 [Phytophthora parasitica]	pif:PITG_03660	60S ribosomal protein L6, putative; K02934 large subunit ribosomal protein L6e	At1g74060	[J] KOG1694 60s ribosomal protein L6	sp|P34091|RL6_MESCR	60S ribosomal protein L6 OS=Mesembryanthemum crystallinum GN=RPL6 PE=2 SV=1	GO:0005840,60s ribosomal protein; GO:0003735,60s ribosomal protein; GO:0006412,60s ribosomal protein
Zoff021650	0	7.5	2	0	4	0	1	3.33	1.5	69.26	0	878.84	0	0.38	0.1	0	0.23	0	0.05	0.16	0.08	3.51	0	43.45	0.16	0.0766667	0.0966667	15.6533	-1.0614	1	7.33924	0.0371639	7.67365	0.00998559	-0.726982	1	gi|568040233|gb|ETM37694.1|	hypothetical protein L914_15819 [Phytophthora parasitica]	pif:PITG_03660	60S ribosomal protein L6, putative; K02934 large subunit ribosomal protein L6e	At1g74060	[J] KOG1694 60s ribosomal protein L6	sp|P34091|RL6_MESCR	60S ribosomal protein L6 OS=Mesembryanthemum crystallinum GN=RPL6 PE=2 SV=1	GO:0005840,60s ribosomal protein; GO:0003735,60s ribosomal protein; GO:0006412,60s ribosomal protein
Zoff021693	3	5	4	93.88	102	19	2	1	0	0	0	0	0.15	0.25	0.2	4.62	5.86	0.94	0.1	0.05	0	0	0	0	0.2	3.80667	0.05	0.001	4.25046	2.47e-05	-5.64386	1	-11.8943	3.12e-07	-2	1	gi|695041033|ref|XP_009408114.1|	PREDICTED: WAT1-related protein At3g30340-like [Musa acuminata subsp. malaccensis]	sbi:SORBI_04g000470	hypothetical protein	--	--	sp|Q9LI65|WTR24_ARATH	WAT1-related protein At3g30340 OS=Arabidopsis thaliana GN=At3g30340 PE=2 SV=1	GO:0016020,wat1-related protein at3g30340-like
Zoff021770	0	0	0	22	2	3	0	0	1	2	0	0	0	0	0	1.08	0.11	0.15	0	0	0.05	0.1	0	0	0.001	0.446667	0.0166667	0.0333333	8.80305	0.034228	1	1	-3.74416	0.281152	4.05889	1	gi|660970598|gb|KEP54348.1|	hypothetical protein V565_019030 [Rhizoctonia solani 123E]	scm:SCHCODRAFT_255932	hypothetical protein	--	--	--	--	--
Zoff021807	0	1	3	2	4	40	0	1	8	0	0	0	0	0.05	0.15	0.1	0.23	1.98	0	0.05	0.4	0	0	0	0.0666667	0.77	0.15	0.001	3.52982	0.154525	-7.22882	1	-9.58871	0.0155338	1.16993	1	gi|656912211|gb|KEF57793.1|	hypothetical protein A1O9_05713 [Exophiala aquamarina CBS 119918]	nfi:NFIA_104980	SET domain protein	SPBC1709.13c	[R] KOG1337 N-methyltransferase	sp|O74738|SET10_SCHPO	Ribosomal lysine N-methyltransferase set10 OS=Schizosaccharomyces pombe (strain 972 / ATCC 24843) GN=set10 PE=3 SV=1	--
Zoff021942	2	4	4	2	3	78	2	0	21	0	0	0	0.1	0.2	0.2	0.1	0.17	3.87	0.1	0	1.06	0	0	0	0.166667	1.38	0.386667	0.001	3.04963	0.209031	-8.59495	0.455921	-10.4305	0.00643862	1.21412	1	gi|24942374|gb|AAL88714.2|AF487830_1	EGI [Thermoascus aurantiacus]	ncr:NCU00762	endoglucanase 3 precursor; K01179 endoglucanase [EC:3.2.1.4]	--	--	sp|Q12624|GUN3_HUMIN	Endoglucanase 3 OS=Humicola insolens GN=CMC3 PE=1 SV=1	GO:0008810,endoglucanase 3 precursor; GO:0000272,endoglucanase 3 precursor
Zoff022034	0	3	0	3	3	19	0	0	5	0	0	0	0	0.15	0	0.15	0.17	0.94	0	0	0.25	0	0	0	0.05	0.42	0.0833333	0.001	3.07039	0.368169	-6.38082	1	-8.71425	0.0433221	0.736966	1	gi|684167752|ref|XP_009157749.1|	RCC1 and BTB domain-containing protein [Exophiala dermatitidis NIH/UT8656]	nfi:NFIA_010680	kelch repeat protein	Hs19923519	[S] KOG1426 FOG: RCC1 domain	sp|Q6NXM2|RCBT1_MOUSE	RCC1 and BTB domain-containing protein 1 OS=Mus musculus GN=Rcbtb1 PE=2 SV=1	--
Zoff022084	0	0	0	15	4	2	0	1	0	6.51	2.03	0	0	0	0	0.74	0.23	0.1	0	0.05	0	0.33	0.1	0	0.001	0.356667	0.0166667	0.143333	8.47843	0.0496739	3.10434	1	-1.3152	1	4.05889	1	gi|660968744|gb|KEP52759.1|	C2H2-type zinc-finger protein [Rhizoctonia solani 123E]	--	--	--	--	--	--	--
Zoff022221	1	0	0	136	21	39	1	1	3	30	12	20	0.05	0	0	6.69	1.21	1.94	0.05	0.05	0.15	1.52	0.62	0.99	0.0166667	3.28	0.0833333	1.04333	7.62059	9.56e-08	3.64616	0.0841616	-1.6525	0.390519	2.32193	1	gi|576981906|gb|EUC54649.1|	autophagy protein Atg8 ubiquitin-like protein [Rhizoctonia solani AG-3 Rhs1AP]	cci:CC1G_03820	IDI-7; K08341 GABA(A) receptor-associated protein (autophagy-related protein 8)	SPBP8B7.24c	[Z] KOG1654 Microtubule-associated anchor protein involved in autophagy and membrane trafficking	sp|P87068|ATG8_LACBI	Autophagy-related protein 8 OS=Laccaria bicolor GN=ATG8 PE=2 SV=2	GO:0015031,symbiosis-related protein; GO:0016020,symbiosis-related protein; GO:0006914,symbiosis-related protein
Zoff022688	1	0	1	1	8	33	1	0	6	0	0	0	0.05	0	0.05	0.05	0.46	1.64	0.05	0	0.3	0	0	0	0.0333333	0.716667	0.116667	0.001	4.42626	0.0554364	-6.86625	1	-9.48516	0.016969	1.80735	1	gi|656916268|gb|KEF61847.1|	hypothetical protein A1O9_03418 [Exophiala aquamarina CBS 119918]	ang:ANI_1_910104	An12g07600; hypothetical protein	--	--	sp|B3Q9N8|Y1987_RHOPT	UPF0311 protein Rpal_1987 OS=Rhodopseudomonas palustris (strain TIE-1) GN=Rpal_1987 PE=3 SV=1	GO:0009279,outer membrane beta-barrel; GO:0016021,outer membrane beta-barrel; GO:0008152,outer membrane beta-barrel; GO:0004376,outer membrane beta-barrel
Zoff022922	4	0	0	7	1	21	0	0	3	0	0	0	0.2	0	0	0.34	0.06	1.04	0	0	0.15	0	0	0	0.0666667	0.48	0.05	0.001	2.848	0.459698	-5.64386	1	-8.90689	0.0397525	-0.415037	1	gi|656910659|gb|KEF56318.1|	hypothetical protein A1O9_07899 [Exophiala aquamarina CBS 119918]	afv:AFLA_069280	hypothetical protein	--	--	--	--	--
Zoff023023	0	0	0	41	9	12	0	1	0	1	1	3	0	0	0	2.02	0.52	0.6	0	0.05	0	0.05	0.05	0.15	0.001	1.04667	0.0166667	0.0833333	10.0316	4.5e-05	2.32193	1	-3.65076	0.0205575	4.05889	1	gi|660968230|gb|KEP52335.1|	putative transcriptional repressor [Rhizoctonia solani 123E]	cci:CC1G_08450	mo25 protein; K08272 calcium binding protein 39	Hs7706481	[S] KOG1566 Conserved protein Mo25	sp|Q06138|CAB39_MOUSE	Calcium-binding protein 39 OS=Mus musculus GN=Cab39 PE=1 SV=2	--
Zoff023517	0	0	0	12	8	30	0	1	1	0	0	2	0	0	0	0.59	0.46	1.49	0	0.05	0.05	0	0	0.1	0.001	0.846667	0.0333333	0.0333333	9.72565	0.000123687	0	1	-4.66676	0.0106049	5.05889	1	gi|66819015|ref|XP_643167.1|	NAD-dependent epimerase/dehydratase family protein [Dictyostelium discoideum AX4]	ddi:DDB_G0276473	NAD-dependent epimerase/dehydratase family protein	7301073	[IE] KOG1430 C-3 sterol dehydrogenase/3-beta-hydroxysteroid dehydrogenase and related dehydrogenases	sp|Q9LPG6|RHM2_ARATH	Trifunctional UDP-glucose 4,6-dehydratase/UDP-4-keto-6-deoxy-D-glucose 3,5-epimerase/UDP-4-keto-L-rhamnose-reductase RHM2 OS=Arabidopsis thaliana GN=RHM2 PE=1 SV=1	GO:0050662,nad-dependent epimerase dehydratase family protein; GO:0003824,nad-dependent epimerase dehydratase family protein; GO:0008152,nad-dependent epimerase dehydratase family protein
Zoff024121	0	0	0	1	0	0	0	0	0	13	0	158	0	0	0	0.05	0	0	0	0	0	0.66	0	7.81	0.001	0.0166667	0.001	2.82333	4.05889	1	11.4632	0.0396162	7.40429	0.0103562	0	1	gi|695449073|ref|XP_009535142.1|	hypothetical protein PHYSODRAFT_523409 [Phytophthora sojae]	pif:PITG_17380	hypothetical protein	--	--	--	--	--
Zoff024128	2	1	1	11	0	88	1	1	11	0	0	1	0.1	0.05	0.05	0.54	0	4.37	0.05	0.05	0.55	0	0	0.05	0.0666667	1.63667	0.216667	0.0166667	4.61765	0.0381314	-3.70044	1	-6.61765	0.0177673	1.70044	1	gi|656910874|gb|KEF56507.1|	cystathionine beta-lyase [Exophiala aquamarina CBS 119918]	ssl:SS1G_04225	hypothetical protein	YHR112c	[E] KOG0053 Cystathionine beta-lyases/cystathionine gamma-synthases	sp|P38716|YHR2_YEAST	Uncharacterized trans-sulfuration enzyme YHR112C OS=Saccharomyces cerevisiae (strain ATCC 204508 / S288c) GN=YHR112C PE=1 SV=1	GO:0008152,cystathionine beta-lyase; GO:0016829,cystathionine beta-lyase; GO:0030170,cystathionine beta-lyase
Zoff024176	3	0	0	3	1	34	0	0	1	0	0	0	0.15	0	0	0.15	0.06	1.69	0	0	0.05	0	0	0	0.05	0.633333	0.0166667	0.001	3.66297	0.278	-4.05889	1	-9.30682	0.0378476	-1.58496	1	gi|584146548|gb|EWG55797.1|	hypothetical protein FVEG_13745 [Fusarium verticillioides 7600]	mgr:MGG_07597	MG07597.4; hypothetical protein	--	--	--	--	GO:0055085,major facilitator superfamily transporter; GO:0016021,major facilitator superfamily transporter
Zoff024372	0	0	0	3	2	28	0	0	11	1	0	0	0	0	0	0.15	0.11	1.39	0	0	0.55	0.05	0	0	0.001	0.55	0.183333	0.0166667	9.10329	0.0226257	-3.45943	1	-5.04439	0.0964958	7.51833	1	gi|656915509|gb|KEF61088.1|	glycerophosphoryl diester phosphodiesterase [Exophiala aquamarina CBS 119918]	pno:SNOG_15067	hypothetical protein; K01126 glycerophosphoryl diester phosphodiesterase [EC:3.1.4.46]	At5g08030	[C] KOG2258 Glycerophosphoryl diester phosphodiesterase	--	--	GO:0006071,glycerophosphoryl diester phosphodiesterase; GO:0008889,glycerophosphoryl diester phosphodiesterase; GO:0006629,glycerophosphoryl diester phosphodiesterase
Zoff024422	0	0	0	20	1	7	0	0	0	0	0	0	0	0	0	0.98	0.06	0.35	0	0	0	0	0	0	0.001	0.463333	0.001	0.001	8.85591	0.0254614	0	1	-8.85591	0.0417744	0	1	gi|576987993|gb|EUC60717.1|	reverse transcriptase from mobile element jockey protein, putative, partial [Rhizoctonia solani AG-3 Rhs1AP]	scm:SCHCODRAFT_269897	RnaseH domain, transposon factor	--	--	--	--	--
Zoff024530	0	0	3	7	2	40	0	1	6	0	0	0	0	0	0.15	0.34	0.11	1.98	0	0.05	0.3	0	0	0	0.05	0.81	0.116667	0.001	4.01792	0.0823474	-6.86625	1	-9.66178	0.00918946	1.22239	1	gi|656910013|gb|KEF55691.1|	acyl-CoA-dependent ceramide synthase [Exophiala aquamarina CBS 119918]	ang:ANI_1_1620094	An11g00990; sphingosine N-acyltransferase lac1; K04709 Acyl-CoA-dependent ceramide synthase [EC:2.3.1.24]	YHL003c	[U] KOG1607 Protein transporter of the TRAM (translocating chain-associating membrane) superfamily	sp|A6ZSP9|LAG1_YEAS7	Sphingosine N-acyltransferase LAG1 OS=Saccharomyces cerevisiae (strain YJM789) GN=LAG1 PE=3 SV=1	GO:0016491,ceramide synthase membrane component; GO:0016746,ceramide synthase membrane component; GO:0016021,ceramide synthase membrane component; GO:0055114,ceramide synthase membrane component
Zoff024538	0	0	0	3	0	51.73	2	0	19	0	0	0	0	0	0	0.15	0	2.57	0.1	0	0.96	0	0	0	0.001	0.906667	0.353333	0.001	9.82443	0.026431	-8.46489	0.503939	-9.82443	0.0385514	8.46489	0.684506	gi|656916180|gb|KEF61759.1|	hypothetical protein A1O9_03329 [Exophiala aquamarina CBS 119918]	nfi:NFIA_037500	class V myosin (Myo4), putative	YOR326w	[Z] KOG0160 Myosin class V heavy chain	sp|Q875Q8|MYO2_LACK1	Myosin-2 OS=Lachancea kluyveri (strain ATCC 58438 / CBS 3082 / CCRC 21498 / NBRC 1685 / JCM 7257 / NCYC 543 / NRRL Y-12651) GN=MYO2 PE=3 SV=1	GO:0016459,class v myosin; GO:0051015,class v myosin; GO:0005524,class v myosin; GO:0003774,class v myosin; GO:0006334,class v myosin; GO:0005634,class v myosin
Zoff024614	12	5	4	0	0	0	0	1	2	3	10	20	0.59	0.25	0.2	0	0	0	0	0.05	0.1	0.15	0.52	0.99	0.346667	0.001	0.05	0.553333	-8.43741	0.0259883	3.46815	0.404772	9.11201	0.0128195	-2.79355	1	gi|695073543|ref|XP_009383943.1|	PREDICTED: galactinol synthase 1-like [Musa acuminata subsp. malaccensis]	rcu:RCOM_1435920	hypothetical protein	At2g47180	[G] KOG1950 Glycosyl transferase, family 8 - glycogenin	sp|O22893|GOLS1_ARATH	Galactinol synthase 1 OS=Arabidopsis thaliana GN=GOLS1 PE=1 SV=1	GO:0005737,galactinol synthase 2-like; GO:0009414,galactinol synthase 2-like; GO:0046872,galactinol synthase 2-like; GO:0009644,galactinol synthase 2-like; GO:0009409,galactinol synthase 2-like; GO:0016051,galactinol synthase 2-like; GO:0042542,galactinol synthase 2-likeGO:0006012,galactinol synthase 2-likeGO:0047216,galactinol synthase 2-likeGO:0009408,galactinol synthase 2-likeGO:0009651,galact…
Zoff024900	1	1	0	65	11	37	0	0	1	6	0	2	0.05	0.05	0	3.2	0.63	1.84	0	0	0.05	0.3	0	0.1	0.0333333	1.89	0.0166667	0.133333	5.82528	3.92e-06	3	1	-3.82528	0.00838782	-1	1	gi|471882556|emb|CCO34228.1|	pantoate--beta-alanine ligase [Rhizoctonia solani AG-1 IB]	cci:CC1G_00821	pantothenate synthetase; K01918 pantoate--beta-alanine ligase [EC:6.3.2.1]	YIL145c	[H] KOG3042 Panthothenate synthetase	sp|A8F7T6|PANC_THELT	Pantothenate synthetase OS=Thermotoga lettingae (strain ATCC BAA-301 / DSM 14385 / TMO) GN=panC PE=3 SV=1	GO:0016874,pantoate-beta-alanine ligase; GO:0009058,pantoate-beta-alanine ligase
Zoff024936	0	0	0	6	2	11	0	0	7	0	0	0	0	0	0	0.3	0.11	0.55	0	0	0.35	0	0	0	0.001	0.32	0.116667	0.001	8.32193	0.0449311	-6.86625	1	-8.32193	0.0611188	6.86625	1	gi|656917785|gb|KEF63363.1|	hypothetical protein A1O9_01340 [Exophiala aquamarina CBS 119918]	act:ACLA_072170	SNF2 family helicase/ATPase, putative	At5g22750	[KL] KOG1001 Helicase-like transcription factor HLTF/DNA helicase RAD5, DEAD-box superfamily	sp|Q9FNI6|SM3L2_ARATH	Putative SWI/SNF-related matrix-associated actin-dependent regulator of chromatin subfamily A member 3-like 2 OS=Arabidopsis thaliana GN=At5g22750 PE=2 SV=1	GO:0003677,snf2 family helicase atpase; GO:0005524,snf2 family helicase atpase
Zoff025217	0	5	4	6	12	18	23	0	67	0	0	0	0	0.25	0.2	0.3	0.69	0.89	1.16	0	3.37	0	0	0	0.15	0.626667	1.51	0.001	2.06274	0.36062	-10.5603	0.0467129	-9.29155	0.00388365	3.33151	0.714743	gi|598025791|ref|XP_007342268.1|	multifunctional beta-oxidation protein [Auricularia delicata TFB-10046 SS5]	lbc:LACBIDRAFT_234865	MFP-1; multifunctional beta-oxidation protein; K14729 multifunctional beta-oxidation protein [EC:4.2.1.- 1.1.1.-]	YKR009c	[I] KOG1206 Peroxisomal multifunctional beta-oxidation protein and related enzymes	sp|Q01373|FOX2_NEUCR	Peroxisomal hydratase-dehydrogenase-epimerase OS=Neurospora crassa (strain ATCC 24698 / 74-OR23-1A / CBS 708.71 / DSM 1257 / FGSC 987) GN=fox-2 PE=1 SV=1	GO:0016491,multifunctional beta-oxidation protein; GO:0055114,multifunctional beta-oxidation protein
Zoff025226	1	1	5	2	26	54	1	22	15	0	0	0	0.05	0.05	0.25	0.1	1.49	2.68	0.05	1.09	0.76	0	0	0	0.116667	1.42333	0.633333	0.001	3.60881	0.0335049	-9.30682	0.0953993	-10.4751	0.000912813	2.44057	1	gi|695040248|ref|XP_009407691.1|	PREDICTED: uncharacterized protein LOC103990325 [Musa acuminata subsp. malaccensis]	zma:100273612	hypothetical protein LOC100273612	--	--	--	--	--
Zoff025640	0	0	0	0	0	0	0	0	0	8	0	83	0	0	0	0	0	0	0	0	0	0.41	0	4.1	0.001	0.001	0.001	1.50333	0	1	10.5539	0.0634619	10.5539	0.0100789	0	1	gi|301113864|ref|XP_002998702.1|	H - or Na -translocating F-type, V-type and A-type ATPase (F-ATPase) Superfamily [Phytophthora infestans T30-4]	pif:PITG_06615	H - or Na -translocating F-type, V-type and A-type ATPase (F-ATPase) Superfamily; K02149 V-type H+-transporting ATPase subunit D [EC:3.6.3.14]	Hs7706757	[C] KOG1647 Vacuolar H+-ATPase V1 sector, subunit D	sp|Q5RCS8|VATD_PONAB	V-type proton ATPase subunit D OS=Pongo abelii GN=ATP6V1D PE=2 SV=1	GO:0042626,h or na translocating ftype; GO:0055085,h or na translocating ftype
Zoff025804	1	1	0	0	1	2	1	0	0	34	3	839	0.05	0.05	0	0	0.06	0.1	0.05	0	0	1.72	0.16	41.48	0.0333333	0.0533333	0.0166667	14.4533	0.678072	1	9.76022	0.00984445	8.08215	0.000914509	-1	1	gi|695407538|ref|XP_009524402.1|	hypothetical protein PHYSODRAFT_350782 [Phytophthora sojae]	pif:PITG_10028	serine palmitoyltransferase, putative; K00654 serine palmitoyltransferase [EC:2.3.1.50]	Hs5454084	[O] KOG1358 Serine palmitoyltransferase	sp|Q55FL5|SPTC1_DICDI	Serine palmitoyltransferase 1 OS=Dictyostelium discoideum GN=sptA PE=3 SV=1	GO:0030170,serine palmitoyltransferase; GO:0009058,serine palmitoyltransferase; GO:0016740,serine palmitoyltransferase
Zoff026096	1	0	0	6	3	43	0	0	11	2	0	0	0.05	0	0	0.3	0.17	2.13	0	0	0.55	0.1	0	0	0.0166667	0.866667	0.183333	0.0333333	5.70044	0.010766	-2.45943	1	-4.70044	0.0473724	3.45943	1	gi|656911429|gb|KEF57062.1|	hypothetical protein A1O9_07252 [Exophiala aquamarina CBS 119918]	pcs:Pc21g12100	Pc21g12100	--	--	sp|C5DL84|ART10_LACTC	Arrestin-related trafficking adapter 10 OS=Lachancea thermotolerans (strain ATCC 56472 / CBS 6340 / NRRL Y-8284) GN=ART10 PE=3 SV=1	--
Zoff026294	0	0	0	2	0	0	0	0	0	8	12	24	0	0	0	0.1	0	0	0	0	0	0.41	0.62	1.19	0.001	0.0333333	0.001	0.74	5.05889	1	9.53138	0.0325209	4.47249	0.0175366	0	1	gi|576983364|gb|EUC56107.1|	P-loop nucleoside triphosphate hydrolase, putative [Rhizoctonia solani AG-3 Rhs1AP]	cci:CC1G_00842	mitochondrial chaperone bcs1; K08900 mitochondrial chaperone BCS1	7297623	[O] KOG0743 AAA+-type ATPase	sp|Q54DY9|BCS1B_DICDI	Probable mitochondrial chaperone BCS1-B OS=Dictyostelium discoideum GN=bcsl1b PE=3 SV=1	GO:0016787,p-loop containing nucleoside triphosphate hydrolase protein; GO:0005524,p-loop containing nucleoside triphosphate hydrolase protein; GO:0008152,p-loop containing nucleoside triphosphate hydrolase protein; GO:0034551,p-loop containing nucleoside triphosphate hydrolase protein
Zoff026308	6	13	5	19	7	697	4	2	55	5	0	0	0.3	0.65	0.25	0.94	0.4	34.58	0.2	0.1	2.77	0.25	0	0	0.4	11.9733	1.02333	0.0833333	4.90368	0.011387	-3.61824	0.570533	-7.16672	0.00466118	1.3552	1	gi|656917981|gb|KEF63559.1|	hypothetical protein A1O9_01537 [Exophiala aquamarina CBS 119918]	ani:AN6051.2	hypothetical protein	--	--	--	--	--
Zoff026384	6.83	25.17	25.79	9.45	25.97	102.63	7	6.66	94.26	0	0	5	0.34	1.26	1.27	0.47	1.49	5.09	0.35	0.33	4.75	0	0	0.25	0.956667	2.35	1.81	0.0833333	1.29657	0.864273	-4.44095	0.187575	-4.81762	0.00709781	0.919901	1	gi|695018157|ref|XP_009396029.1|	PREDICTED: uncharacterized protein LOC103981141 [Musa acuminata subsp. malaccensis]	vvi:100246506	hypothetical protein LOC100246506	--	--	--	--	--
Zoff026385	5.17	40.83	32.21	9.55	10.03	144.37	0	1.34	37.74	0	2	0	0.25	2.05	1.59	0.47	0.58	7.16	0	0.07	1.9	0	0.1	0	1.29667	2.73667	0.656667	0.0333333	1.07761	1	-4.30012	0.731657	-6.35931	0.00196396	-0.981575	1	gi|695060239|ref|XP_009418501.1|	PREDICTED: uncharacterized protein LOC103998683 [Musa acuminata subsp. malaccensis]	vvi:100246506	hypothetical protein LOC100246506	--	--	--	--	--
Zoff026547	5	16.74	29.94	32.63	38.75	4.15	4	0	0	0	0	0	0.25	0.84	1.48	1.61	2.23	0.21	0.2	0	0	0	0	0	0.856667	1.35	0.0666667	0.001	0.656154	1	-6.05889	1	-10.3987	0.000359612	-3.6837	0.344989	gi|671154197|ref|XP_008715813.1|	hypothetical protein HMPREF1541_03239 [Cyphellophora europaea CBS 101466]	pno:SNOG_16101	hypothetical protein; K11517 (S)-2-hydroxy-acid oxidase [EC:1.1.3.15]	Hs11068137	[C] KOG0538 Glycolate oxidase	sp|Q9WU19|HAOX1_MOUSE	Hydroxyacid oxidase 1 OS=Mus musculus GN=Hao1 PE=1 SV=1	GO:0016491,l-lactate dehydrogenase; GO:0055114,l-lactate dehydrogenase; GO:0010181,l-lactate dehydrogenase
Zoff026548	0	19.26	2.06	21.37	9.25	9.85	0	2	3	0	1	1	0	0.97	0.1	1.05	0.53	0.49	0	0.1	0.15	0	0.05	0.05	0.356667	0.69	0.0833333	0.0333333	0.95202	1	-1.32193	1	-4.37156	0.0157289	-2.09761	1	gi|671154197|ref|XP_008715813.1|	hypothetical protein HMPREF1541_03239 [Cyphellophora europaea CBS 101466]	pno:SNOG_16101	hypothetical protein; K11517 (S)-2-hydroxy-acid oxidase [EC:1.1.3.15]	Hs11068137	[C] KOG0538 Glycolate oxidase	sp|Q9WU19|HAOX1_MOUSE	Hydroxyacid oxidase 1 OS=Mus musculus GN=Hao1 PE=1 SV=1	GO:0003824,l-lactate dehydrogenase
Zoff026608	2	1	2	3	2	44	1	1	13	0	0	0	0.1	0.05	0.1	0.15	0.11	2.18	0.05	0.05	0.65	0	0	0	0.0833333	0.813333	0.25	0.001	3.28688	0.175642	-7.96578	0.581577	-9.6677	0.0166304	1.58496	1	gi|671177774|ref|XP_008729350.1|	26S protease regulatory subunit 8 [Cladophialophora carrionii CBS 160.54]	bfu:BC1G_14763	26S protease regulatory subunit 8 ; K03066 26S proteasome regulatory subunit T6	YGL048c	[O] KOG0728 26S proteasome regulatory complex, ATPase RPT6	sp|Q01939|PRS8_YEAST	26S protease regulatory subunit 8 homolog OS=Saccharomyces cerevisiae (strain ATCC 204508 / S288c) GN=RPT6 PE=1 SV=4	GO:0005737,26s protease regulatory subunit 8; GO:0008233,26s protease regulatory subunit 8; GO:0030163,26s protease regulatory subunit 8; GO:0005524,26s protease regulatory subunit 8; GO:0000502,26s protease regulatory subunit 8; GO:0006508,26s protease regulatory subunit 8
Zoff026727	0	2	0	2	4.83	222.12	0	1	17.99	0.73	0	0.5	0	0.1	0	0.1	0.28	11.02	0	0.05	0.91	0.04	0	0.02	0.0333333	3.8	0.32	0.02	6.83289	0.00670018	-4	0.918045	-7.56986	0.00374176	3.26303	1	gi|684163315|ref|XP_009155533.1|	enoyl-CoA hydratase [Exophiala dermatitidis NIH/UT8656]	nfi:NFIA_022780	enoyl-CoA hydratase/isomerase family protein; K01692 enoyl-CoA hydratase [EC:4.2.1.17]	7303265	[I] KOG1680 Enoyl-CoA hydratase	sp|A4YI89|HPCD_METS5	3-hydroxypropionyl-coenzyme A dehydratase OS=Metallosphaera sedula (strain ATCC 51363 / DSM 5348) GN=Msed_2001 PE=1 SV=1	GO:0003824,enoyl- hydratase; GO:0008152,enoyl- hydratase
Zoff026759	0	0	0	0	0	0	0	0	0	11	0	78	0	0	0	0	0	0	0	0	0	0.56	0	3.86	0.001	0.001	0.001	1.47333	0	1	10.5249	0.0585607	10.5249	0.00836507	0	1	gi|570983671|gb|ETP43455.1|	hypothetical protein, variant [Phytophthora parasitica P10297]	pif:PITG_17087	hypothetical protein	--	--	--	--	--
Zoff026854	18	26	18	34	14	109	12	6	164	1	2	4	0.89	1.3	0.89	1.67	0.8	5.41	0.61	0.3	8.26	0.05	0.1	0.2	1.02667	2.62667	3.05667	0.116667	1.35527	0.558289	-4.71149	0.0731464	-4.49277	0.00111049	1.57399	1	gi|628329406|ref|XP_007744082.1|	hypothetical protein A1O5_05291 [Cladophialophora psammophila CBS 110553]	act:ACLA_024710	thioesterase family protein	SPBC26H8.11c	[S] KOG4781 Uncharacterized conserved protein	sp|Q9HDW5|YFW6_SCHPO	UPF0644 protein PB2B4.06 OS=Schizosaccharomyces pombe (strain 972 / ATCC 24843) GN=SPAPB2B4.06 PE=3 SV=2	GO:0015991,thioesterase family protein; GO:0033180,thioesterase family protein; GO:0015078,thioesterase family protein
Zoff027015	0	0	0	0	0	0	0	0	1	2	0	57	0	0	0	0	0	0	0	0	0.05	0.1	0	2.82	0.001	0.001	0.0166667	0.973333	0	1	5.8679	0.276897	9.92679	0.0422077	4.05889	1	gi|675195565|ref|XP_008906667.1|	hypothetical protein PPTG_12407 [Phytophthora parasitica INRA-310]	pif:PITG_18912	nonsense transcript regulator; K14326 regulator of nonsense transcripts 1 [EC:3.6.4.-]	At5g47010	[A] KOG1802 RNA helicase nonsense mRNA reducing factor (pNORF1)	sp|Q9FJR0|RENT1_ARATH	Regulator of nonsense transcripts 1 homolog OS=Arabidopsis thaliana GN=UPF1 PE=1 SV=2	GO:0000184,regulator of nonsense transcripts 1 homolog; GO:0009611,regulator of nonsense transcripts 1 homolog; GO:0016246,regulator of nonsense transcripts 1 homolog; GO:0008270,regulator of nonsense transcripts 1 homolog; GO:0009867,regulator of nonsense transcripts 1 homolog; GO:0048571,regulator of nonsense transcripts 1 homolog; GO:0048825,regulator of nonsense transcripts 1 homologGO:004274…
Zoff027062	0	0	0	0	0	0	0	0	0	4	0	89.6	0	0	0	0	0	0	0	0	0	0.2	0	4.43	0.001	0.001	0.001	1.54333	0	1	10.5918	0.0784749	10.5918	0.0146495	0	1	gi|675165607|ref|XP_008891688.1|	signal peptidase I [Phytophthora parasitica INRA-310]	pif:PITG_10994	mitochondrial inner membrane protease subunit, putative; K09648 mitochondrial inner membrane protease subunit 2 [EC:3.4.21.-]	Hs14211845	[OU] KOG1568 Mitochondrial inner membrane protease, subunit IMP2	sp|Q2KI92|IMP2L_BOVIN	Mitochondrial inner membrane protease subunit 2 OS=Bos taurus GN=IMMP2L PE=2 SV=1	GO:0008236,signal peptidase i; GO:0006508,signal peptidase i; GO:0044425,signal peptidase i
Zoff027267	1	1.39	1	7	2	29.98	0	1	11	0	0	0	0.05	0.07	0.05	0.34	0.11	1.49	0	0.05	0.55	0	0	0	0.0566667	0.646667	0.2	0.001	3.51245	0.0760933	-7.64386	0.962527	-9.33688	0.0147144	1.81943	1	gi|656914979|gb|KEF60558.1|	ferrochelatase [Exophiala aquamarina CBS 119918]	pcs:Pc22g15520	Pc22g15520; K01772 ferrochelatase [EC:4.99.1.1]	YOR176w	[H] KOG1321 Protoheme ferro-lyase (ferrochelatase)	sp|P16622|HEMH_YEAST	Ferrochelatase, mitochondrial OS=Saccharomyces cerevisiae (strain ATCC 204508 / S288c) GN=HEM15 PE=1 SV=1	GO:0004325,ferrochelatase; GO:0006783,ferrochelatase
Zoff027276	0	0	1	12	0	44	1	0	0	0	2	1	0	0	0.05	0.59	0	2.18	0.05	0	0	0	0.1	0.05	0.0166667	0.923333	0.0166667	0.05	5.79181	0.0264683	1.58496	1	-4.20685	0.124679	0	1	gi|502112363|ref|XP_004494307.1|	PREDICTED: 60S ribosomal protein L21-1-like [Cicer arietinum]	sbi:SORBI_01g019840	hypothetical protein; K02889 large subunit ribosomal protein L21e	CE00078	[J] KOG1732 60S ribosomal protein L21	sp|P34334|RL21_CAEEL	60S ribosomal protein L21 OS=Caenorhabditis elegans GN=rpl-21 PE=1 SV=3	--
Zoff027308	15	46	15	132	27	83	4	9	77	2	1	1	0.74	2.3	0.74	6.5	1.55	4.12	0.2	0.45	3.88	0.1	0.05	0.05	1.26	4.05667	1.51	0.0666667	1.68687	0.20819	-4.50144	0.095081	-5.92719	2.05e-06	0.261125	1	gi|514750165|ref|XP_004962039.1|	PREDICTED: NAC domain-containing protein 48-like [Setaria italica]	osa:4325006	Os01g0884300	--	--	sp|Q7F2L3|NAC48_ORYSJ	NAC domain-containing protein 48 OS=Oryza sativa subsp. japonica GN=NAC48 PE=2 SV=1	GO:0006355,nac domain-containing protein 48-like; GO:0003677,nac domain-containing protein 48-like; GO:0005634,nac domain-containing protein 48-like
Zoff027369	4	2	0	5	5	313	1	3	4	1	3	2	0.2	0.1	0	0.25	0.29	15.53	0.05	0.15	0.2	0.05	0.16	0.1	0.1	5.35667	0.133333	0.103333	5.74326	0.0107032	-0.367732	1	-5.69596	0.00917752	0.415037	1	gi|656916887|gb|KEF62465.1|	NAD-dependent aldehyde dehydrogenase [Exophiala aquamarina CBS 119918]	ure:UREG_07099	hypothetical protein	SPAC9E9.09c	[C] KOG2450 Aldehyde dehydrogenase	sp|O14293|YF19_SCHPO	Putative aldehyde dehydrogenase-like protein C9E9.09c OS=Schizosaccharomyces pombe (strain 972 / ATCC 24843) GN=SPAC9E9.09c PE=1 SV=1	GO:0016620,aldehyde dehydrogenase (nad+); GO:0055114,aldehyde dehydrogenase (nad+)
Zoff027467	7	12	22	9	30	31	10	9	16	2	0	3	0.34	0.6	1.09	0.44	1.72	1.54	0.51	0.45	0.81	0.1	0	0.15	0.676667	1.23333	0.59	0.0833333	0.866046	1	-2.82375	0.489779	-3.88753	0.00851993	-0.19773	1	gi|695058743|ref|XP_009417696.1|	PREDICTED: putative lipoxygenase 5 [Musa acuminata subsp. malaccensis]	zma:100037807	lox7; lipoxygenase7 (EC:1.13.11.12); K00454 lipoxygenase [EC:1.13.11.12]	--	--	sp|Q7XV13|LOX5_ORYSJ	Putative lipoxygenase 5 OS=Oryza sativa subsp. japonica GN=Os04g0447100 PE=3 SV=2	GO:0031408,lipoxygenase 5; GO:0016165,lipoxygenase 5; GO:0005506,lipoxygenase 5; GO:0009536,lipoxygenase 5; GO:0055114,lipoxygenase 5
Zoff027488	4	4	0	7	4	43	0	2	26	0	0	0	0.2	0.2	0	0.34	0.23	2.13	0	0.1	1.31	0	0	0	0.133333	0.9	0.47	0.001	2.75489	0.210455	-8.87652	0.369163	-9.81378	0.0042023	1.81762	1	gi|671180225|ref|XP_008730574.1|	ribosomal protein L15 [Cladophialophora carrionii CBS 160.54]	pcs:Pc12g15290	Pc12g15290; K02876 large subunit ribosomal protein L15	At5g64670	[J] KOG0846 Mitochondrial/chloroplast ribosomal protein L15/L10	sp|B0UHV0|RL15_METS4	50S ribosomal protein L15 OS=Methylobacterium sp. (strain 4-46) GN=rplO PE=3 SV=1	GO:0005840,large subunit ribosomal protein l15
Zoff027521	2	10	0	14	13	4	0	1	3	0	0	0	0.1	0.5	0	0.69	0.75	0.2	0	0.05	0.15	0	0	0	0.2	0.546667	0.0666667	0.001	1.45066	1	-6.05889	1	-9.09452	0.00888596	-1.58496	1	gi|695000147|ref|XP_009410468.1|	PREDICTED: phosphate transporter PHO1 homolog 1 [Musa acuminata subsp. malaccensis]	vvi:100245828	hypothetical protein LOC100245828	At1g68740	[U] KOG1162 Predicted small molecule transporter	sp|Q93ZF5|PHO11_ARATH	Phosphate transporter PHO1 homolog 1 OS=Arabidopsis thaliana GN=PHO1-H1 PE=2 SV=1	GO:0006810,phosphate transporter pho1 homolog 1-like; GO:0044249,phosphate transporter pho1 homolog 1-like; GO:1901576,phosphate transporter pho1 homolog 1-like; GO:0044238,phosphate transporter pho1 homolog 1-like; GO:0044699,phosphate transporter pho1 homolog 1-like; GO:0016020,phosphate transporter pho1 homolog 1-like
Zoff027595	0	0	0	10	2.68	21	4	4	3	0	0	0	0	0	0	0.49	0.15	1.04	0.2	0.2	0.15	0	0	0	0.001	0.56	0.183333	0.001	9.12928	0.00532463	-7.51833	0.525757	-9.12928	0.011982	7.51833	0.751355	gi|27734375|gb|AAM51216.1|	polyubiquitin, partial [Cercomonas sp. ATCC 50316]	vcn:VOLCADRAFT_75856	ubqA; polyubiquitin; K08770 ubiquitin C	At4g05050	[OR] KOG0001 Ubiquitin and ubiquitin-like proteins	sp|P0CH33|UBQ11_ARATH	Polyubiquitin 11 OS=Arabidopsis thaliana GN=UBQ11 PE=1 SV=1	GO:0005730,polyubiquitin 5; GO:0016874,polyubiquitin 5; GO:0006464,polyubiquitin 5; GO:0006511,polyubiquitin 5; GO:0005618,polyubiquitin 5; GO:0005774,polyubiquitin 5
Zoff027841	3	0	3	4	5	18	1	2	1	0	0	0	0.15	0	0.15	0.2	0.29	0.89	0.05	0.1	0.05	0	0	0	0.1	0.46	0.0666667	0.001	2.20163	0.51501	-6.05889	1	-8.84549	0.021619	-0.584963	1	gi|628260680|ref|XP_007726517.1|	hypothetical protein A1O1_07458 [Capronia coronata CBS 617.96]	ang:ANI_1_326154	An17g02250; cell cycle control protein cwf14; K12873 bud site selection protein 31	SPBC24C6.11	[K] KOG3404 G10 protein/predicted nuclear transcription regulator	sp|Q962X9|BUD31_BRABE	Protein BUD31 homolog OS=Branchiostoma belcheri PE=2 SV=1	GO:0005634,cell cycle control protein cwf14
Zoff027911	11	3	4	2	2	8	57	12	189	0	4	4	0.54	0.15	0.2	0.1	0.11	0.4	2.88	0.59	9.52	0	0.21	0.2	0.296667	0.203333	4.33	0.136667	-0.544996	1	-4.98563	0.0306227	-0.573185	1	3.86745	0.127074	gi|146724107|gb|ABQ42552.1|	chloroplast ribulose-1,5-bisphosphate carboxylase/oxygenase small subunit [Musa acuminata AAA Group]	osa:4351966	Os12g0274700; K01602 ribulose-bisphosphate carboxylase small chain [EC:4.1.1.39]	--	--	sp|O24045|RBS_MUSAC	Ribulose bisphosphate carboxylase small chain, chloroplastic OS=Musa acuminata GN=RBCS1 PE=2 SV=1	GO:0019253,chloroplast ribulose- -bisphosphate carboxylase oxygenase small subunit; GO:0016984,chloroplast ribulose- -bisphosphate carboxylase oxygenase small subunit; GO:0004497,chloroplast ribulose- -bisphosphate carboxylase oxygenase small subunit; GO:0009853,chloroplast ribulose- -bisphosphate carboxylase oxygenase small subunit; GO:0009507,chloroplast ribulose- -bisphosphate carboxylase oxyg…
Zoff027922	0	0	0	11	2	8	0	0	0	1	1	0	0	0	0	0.54	0.11	0.4	0	0	0	0.05	0.05	0	0.001	0.35	0.001	0.0333333	8.45121	0.0303399	5.05889	1	-3.39232	0.23055	0	1	gi|471904692|emb|CCO29221.1|	hypothetical protein BN14_03226 [Rhizoctonia solani AG-1 IB]	ctt:CtCNB1_2501	copper-resistance protein, CopA family	--	--	--	--	--
Zoff028297	2	1	1	12	2	55	0	0	7	0	0	0	0.1	0.05	0.05	0.59	0.11	2.73	0	0	0.35	0	0	0	0.0666667	1.14333	0.116667	0.001	4.10014	0.0214038	-6.86625	1	-10.159	0.00290092	0.807355	1	gi|628297969|ref|XP_007758705.1|	hypothetical protein A1O7_06513 [Cladophialophora yegresii CBS 114405]	afv:AFLA_068190	CORD and CS domain protein	7301118	[R] KOG1667 Zn2+-binding protein Melusin/RAR1, contains CHORD domain	sp|Q9VCC0|CHRD1_DROME	Cysteine and histidine-rich domain-containing protein OS=Drosophila melanogaster GN=CHORD PE=1 SV=1	--
Zoff028342	3	0	0	6	4	51	1	0	6	3	0	0	0.15	0	0	0.3	0.23	2.53	0.05	0	0.3	0.15	0	0	0.05	1.02	0.116667	0.05	4.3505	0.0349952	-1.22239	1	-4.3505	0.0573591	1.22239	1	gi|671167958|ref|XP_008724445.1|	hypothetical protein G647_10231 [Cladophialophora carrionii CBS 160.54]	ure:UREG_06532	hypothetical protein	--	--	--	--	--
Zoff028348	0	0	0	8	0	1	1	1	0	13	20	56	0	0	0	0.39	0	0.05	0.05	0.05	0	0.66	1.03	2.77	0.001	0.146667	0.0333333	1.48667	7.1964	0.723443	5.47897	0.0164372	3.34147	0.0484977	5.05889	1	gi|660965019|gb|KEP49881.1|	RTA1-like protein [Rhizoctonia solani 123E]	cci:CC1G_05405	hypothetical protein	--	--	sp|O13780|YEO2_SCHPO	Uncharacterized protein C17G6.02c OS=Schizosaccharomyces pombe (strain 972 / ATCC 24843) GN=SPAC17G6.02c PE=4 SV=1	GO:0016021,rta1-domain-containing protein; GO:0006950,rta1-domain-containing protein
Zoff028503	1	0	0	2	4	19	0	0	2	0	0	0	0.05	0	0	0.1	0.23	0.94	0	0	0.1	0	0	0	0.0166667	0.423333	0.0333333	0.001	4.66676	0.099028	-5.05889	1	-8.72565	0.0467338	1	1	gi|656916043|gb|KEF61622.1|	hypothetical protein A1O9_03190 [Exophiala aquamarina CBS 119918]	mgr:MGG_08760	MG08760.4; hypothetical protein	SPAC1002.16c	[G] KOG2533 Permease of the major facilitator superfamily	sp|Q9US44|YIZG_SCHPO	Uncharacterized transporter C1002.16c OS=Schizosaccharomyces pombe (strain 972 / ATCC 24843) GN=SPAC1002.16c PE=3 SV=1	GO:0055085,high-affinity nicotinic acid transporter; GO:0016021,high-affinity nicotinic acid transporter
Zoff028596	0	0	0	0	0	0	0	0	0	10	1	70	0	0	0	0	0	0	0	0	0	0.51	0.05	3.46	0.001	0.001	0.001	1.34	0	1	10.388	0.0402773	10.388	0.0045409	0	1	gi|301111450|ref|XP_002904804.1|	transcription elongation factor, putative [Phytophthora infestans T30-4]	pif:PITG_06819	transcription elongation factor, putative; K03145 transcription elongation factor S-II	Hs4507385	[K] KOG1105 Transcription elongation factor TFIIS/Cofactor of enhancer-binding protein Sp1	sp|Q15560|TCEA2_HUMAN	Transcription elongation factor A protein 2 OS=Homo sapiens GN=TCEA2 PE=1 SV=1	GO:0003676,transcription elongation factor s-ii; GO:0006355,transcription elongation factor s-ii
Zoff028761	1	4	3	10	2	71	1	1	10	0	0	0	0.05	0.2	0.15	0.49	0.11	3.52	0.05	0.05	0.5	0	0	0	0.133333	1.37333	0.2	0.001	3.36457	0.0767937	-7.64386	0.740663	-10.4235	0.00237736	0.584963	1	gi|656912868|gb|KEF58450.1|	hypothetical protein A1O9_06376 [Exophiala aquamarina CBS 119918]	afm:AFUA_3G07290	SD08430p	YBR220c	[P] KOG3574 Acetyl-CoA transporter	sp|P38318|YB70_YEAST	Uncharacterized membrane protein YBR220C OS=Saccharomyces cerevisiae (strain ATCC 204508 / S288c) GN=YBR220C PE=1 SV=1	GO:0016021,acetyl coenzyme a transporter; GO:0008521,acetyl coenzyme a transporter; GO:0015876,acetyl coenzyme a transporter
Zoff028932	4	1	1	9	3	45	2	0	13	2	0	1	0.2	0.05	0.05	0.44	0.17	2.23	0.1	0	0.65	0.1	0	0.05	0.1	0.946667	0.25	0.05	3.24286	0.0851793	-2.32193	1	-4.24286	0.0409059	1.32193	1	gi|628288167|ref|XP_007755896.1|	hypothetical protein A1O7_03689 [Cladophialophora yegresii CBS 114405]	ure:UREG_01097	hypothetical protein	--	--	--	--	--
Zoff029140	106.12	34.01	257.54	20.99	17.06	15.96	269.9	393.3	393.67	1539.41	321.91	862.81	5.22	1.7	12.71	1.03	0.98	0.79	13.65	19.48	19.83	78.09	16.65	42.66	6.54333	0.933333	17.6533	45.8	-2.80956	0.00452992	1.37541	0.874481	5.61681	3.49e-09	1.43184	1	gi|409900251|gb|AFV46359.1|	pathogenesis-related protein 5, partial [Curcuma aromatica]	osa:4333634	Os03g0661600	--	--	sp|P33679|ZEAM_MAIZE	Zeamatin OS=Zea mays GN=Zlp PE=1 SV=2	--
Zoff029141	3.89	1.06	1.18	0	0	1.05	2.41	48.49	79.41	201.51	48.68	79.74	0.19	0.05	0.06	0	0	0.05	0.12	2.4	4	10.22	2.52	3.94	0.1	0.0166667	2.17333	5.56	-2.58496	1	1.35518	1	8.38198	2.97e-08	4.44184	0.132888	gi|409900251|gb|AFV46359.1|	pathogenesis-related protein 5, partial [Curcuma aromatica]	osa:4333634	Os03g0661600	--	--	sp|P33679|ZEAM_MAIZE	Zeamatin OS=Zea mays GN=Zlp PE=1 SV=2	--
Zoff029142	10.99	8	47.62	1	4	2	76.66	11	8.99	48.68	17.73	41.08	0.54	0.4	2.35	0.05	0.23	0.1	3.88	0.54	0.45	2.47	0.92	2.03	1.09667	0.126667	1.62333	1.80667	-3.11402	0.0292473	0.154371	1	3.83422	0.00111516	0.565834	1	gi|409900245|gb|AFV46356.1|	pathogenesis-related protein 5, partial [Zingiber officinale]	osa:4333649	Os03g0663500	--	--	sp|P25096|P21_SOYBN	Protein P21 OS=Glycine max PE=1 SV=1	--
Zoff029346	6	6	1.67	13	14.98	2.75	0	1	15	0.5	0	0.5	0.3	0.3	0.08	0.64	0.86	0.14	0	0.05	0.76	0.03	0	0.02	0.226667	0.546667	0.27	0.0166667	1.27009	0.982738	-4.01792	1	-5.03562	0.0354334	0.252387	1	gi|695062860|ref|XP_009419917.1|	PREDICTED: protein NRT1/ PTR FAMILY 5.6-like [Musa acuminata subsp. malaccensis]	osa:4334618	Os03g0823500	At2g37900	[E] KOG1237 H+/oligopeptide symporter	sp|P0CI03|PTR28_ARATH	Protein NRT1/ PTR FAMILY 5.6 OS=Arabidopsis thaliana GN=NPF5.6 PE=2 SV=1	GO:0016020,protein nrt1 ptr family -like; GO:0006810,protein nrt1 ptr family -like; GO:0005215,protein nrt1 ptr family -like
Zoff029672	0	0	0	20	6	3	0	1	0	1	0	1	0	0	0	0.98	0.34	0.15	0	0.05	0	0.05	0	0.05	0.001	0.49	0.0166667	0.0333333	8.93664	0.0118528	1	1	-3.87774	0.114511	4.05889	1	gi|660969709|gb|KEP53577.1|	phosphoglycerate kinase [Rhizoctonia solani 123E]	cci:CC1G_05204	Sdad1 protein; K14856 protein SDA1	--	--	--	--	--
Zoff029728	0	0	0	0	0	0	0	0	0	4	2	55	0	0	0	0	0	0	0	0	0	0.2	0.1	2.72	0.001	0.001	0.001	1.00667	0	1	9.97537	0.0625582	9.97537	0.00989575	0	1	gi|695388952|ref|XP_009519311.1|	hypothetical protein PHYSODRAFT_541614 [Phytophthora sojae]	pif:PITG_10969	pre-mRNA-processing-splicing factor 8; K12856 pre-mRNA-processing factor 8	Hs17999537	[A] KOG1795 U5 snRNP spliceosome subunit	sp|Q99PV0|PRP8_MOUSE	Pre-mRNA-processing-splicing factor 8 OS=Mus musculus GN=Prpf8 PE=1 SV=2	GO:0017070,pre-mrna-processing-splicing factor 8; GO:0005681,pre-mrna-processing-splicing factor 8; GO:0000398,pre-mrna-processing-splicing factor 8; GO:0030623,pre-mrna-processing-splicing factor 8
Zoff029763	0	0	0	4	3	32	0	0	4	0	0	0	0	0	0	0.2	0.17	1.59	0	0	0.2	0	0	0	0.001	0.653333	0.0666667	0.001	9.35168	0.00884271	-6.05889	1	-9.35168	0.0167761	6.05889	1	gi|628277151|ref|XP_007728096.1|	hypothetical protein A1O1_09049 [Capronia coronata CBS 617.96]	act:ACLA_082890	hypothetical protein	--	--	--	--	--
Zoff029903	14	5	5.14	0.5	0	0	0	0	1	2	1	0	0.69	0.25	0.25	0.02	0	0	0	0	0.05	0.1	0.05	0	0.396667	0.00666667	0.0166667	0.05	-5.89482	0.0470744	1.58496	1	2.90689	1	-4.57289	0.37508	gi|695019174|ref|XP_009396576.1|	PREDICTED: mitogen-activated protein kinase homolog MMK2-like [Musa acuminata subsp. malaccensis]	osa:4344698	Os08g0157000; K04371 extracellular signal-regulated kinase 1/2 [EC:2.7.11.24]	At4g01370	[T] KOG0660 Mitogen-activated protein kinase	sp|Q5J4W4|MPK2_ORYSJ	Mitogen-activated protein kinase 2 OS=Oryza sativa subsp. japonica GN=MPK2 PE=2 SV=1	GO:0004707,mitogen-activated protein kinase 2-like; GO:0000165,mitogen-activated protein kinase 2-like; GO:0006468,mitogen-activated protein kinase 2-like; GO:0005524,mitogen-activated protein kinase 2-like
Zoff030009	0	1	0	47	7	13	0	0	1	10	4	3	0	0.05	0	2.31	0.4	0.65	0	0	0.05	0.51	0.21	0.15	0.0166667	1.12	0.0166667	0.29	6.07039	0.000374924	4.12102	0.563961	-1.94937	0.378455	0	1	gi|660968755|gb|KEP52770.1|	endoplasmic reticulum protein [Rhizoctonia solani 123E]	scm:SCHCODRAFT_54489	hypothetical protein; K09518 DnaJ homolog subfamily B member 12	SPBC17A3.05c	[O] KOG0714 Molecular chaperone (DnaJ superfamily)	sp|O13633|YNF5_SCHPO	Uncharacterized J domain-containing protein C17A3.05c OS=Schizosaccharomyces pombe (strain 972 / ATCC 24843) GN=pi041 PE=1 SV=1	--
Zoff030052	0	1	0	0	0	0	0	0	0	7	0	129	0	0.05	0	0	0	0	0	0	0	0.36	0	6.38	0.0166667	0.001	0.001	2.24667	-4.05889	1	11.1336	0.0537609	11.1336	0.00762557	-4.05889	1	gi|675184599|ref|XP_008901184.1|	hypothetical protein PPTG_08035 [Phytophthora parasitica INRA-310]	pif:PITG_00725	N-acetylglucosamine-1-phosphotransferase subunits alpha/beta, putative; K08239 UDP-N-acetylglucosamine-lysosomal-enzyme [EC:2.7.8.17]	--	--	sp|Q5RGJ8|GNPTA_DANRE	N-acetylglucosamine-1-phosphotransferase subunits alpha/beta OS=Danio rerio GN=gnptab PE=1 SV=1	GO:0008152,n-acetylglucosamine-1-phosphotransferase subunits alpha; GO:0016772,n-acetylglucosamine-1-phosphotransferase subunits alpha
Zoff030224	0	0	0	3	0	46.46	1.58	0	5	0	0	0	0	0	0	0.15	0	2.31	0.08	0	0.25	0	0	0	0.001	0.82	0.11	0.001	9.67948	0.0325044	-6.78136	1	-9.67948	0.0458717	6.78136	1	gi|656908889|gb|KEF54599.1|	hypothetical protein A1O9_09041 [Exophiala aquamarina CBS 119918]	mgr:MGG_06821	MG06821.4; hypothetical protein	Hs20482669	[C] KOG0758 Mitochondrial carnitine-acylcarnitine carrier protein	sp|Q8CFJ7|S2545_MOUSE	Solute carrier family 25 member 45 OS=Mus musculus GN=Slc25a45 PE=2 SV=1	GO:0016021,mitochondrial carrier protein; GO:0006810,mitochondrial carrier protein
Zoff030360	2	1	1	9	3	73	3	0	8	1	0	0	0.1	0.05	0.05	0.44	0.17	3.62	0.15	0	0.4	0.05	0	0	0.0666667	1.41	0.183333	0.0166667	4.40259	0.0130544	-3.45943	1	-6.40259	0.00525332	1.45943	1	gi|684160509|ref|XP_009154132.1|	hypothetical protein HMPREF1120_01856 [Exophiala dermatitidis NIH/UT8656]	nfi:NFIA_064500	clathrin-coated vesiclec protein (Bud7), putative	--	--	sp|P87317|YB2G_SCHPO	Uncharacterized protein C31F10.16 OS=Schizosaccharomyces pombe (strain 972 / ATCC 24843) GN=SPBC31F10.16 PE=4 SV=2	--
Zoff030370	0	0	0	15	2	9	0	0	0	0	0	0	0	0	0	0.74	0.11	0.45	0	0	0	0	0	0	0.001	0.433333	0.001	0.001	8.75933	0.0151321	0	1	-8.75933	0.0283651	0	1	gi|639563770|gb|KDN41400.1|	hypothetical protein RSAG8_07515, partial [Rhizoctonia solani AG-8 WAC10335]	ppl:POSPLDRAFT_97049	hypothetical protein; K09699 2-oxoisovalerate dehydrogenase E2 component (dihydrolipoyl transacylase) [EC:2.3.1.168]	CE01115	[C] KOG0558 Dihydrolipoamide transacylase (alpha-keto acid dehydrogenase E2 subunit)	sp|Q23571|ODB2_CAEEL	Lipoamide acyltransferase component of branched-chain alpha-keto acid dehydrogenase complex, mitochondrial OS=Caenorhabditis elegans GN=ZK669.4 PE=3 SV=1	GO:0008152,#NAME?; GO:0016746,#NAME?
Zoff030638	37	16	3	37	38	25	7	9	9	1	0	4	1.82	0.8	0.15	1.82	2.18	1.24	0.35	0.45	0.45	0.05	0	0.2	0.923333	1.74667	0.416667	0.0833333	0.919681	1	-2.32193	0.967899	-4.38957	0.000429604	-1.14796	1	gi|695036853|ref|XP_009405898.1|	PREDICTED: 1,4-alpha-glucan-branching enzyme 2-2, chloroplastic/amyloplastic-like [Musa acuminata subsp. malaccensis]	osa:4335763	Os04g0409200	At5g03650	[G] KOG0470 1,4-alpha-glucan branching enzyme/starch branching enzyme II	sp|Q41058|GLGB1_PEA	1,4-alpha-glucan-branching enzyme 1, chloroplastic/amyloplastic OS=Pisum sativum GN=SBEI PE=1 SV=1	GO:0004553,#NAME?; GO:0005978,#NAME?; GO:0043169,#NAME?; GO:0003844,#NAME?
Zoff030739	0	0	0	0	0	0	235	2	1	0	0	0	0	0	0	0	0	0	11.88	0.1	0.05	0	0	0	0.001	0.001	4.01	0.001	0	1	-11.9694	0.0381893	0	1	11.9694	0.0795098	gi|587663268|gb|EWY85609.1|	hypothetical protein FOYG_12750 [Fusarium oxysporum FOSC 3-a]	fgr:FG03968.1	hypothetical protein	--	--	sp|Q5BCX8|EGLD_EMENI	Endo-beta-1,4-glucanase D OS=Emericella nidulans (strain FGSC A4 / ATCC 38163 / CBS 112.46 / NRRL 194 / M139) GN=eglD PE=1 SV=1	--
Zoff030742	150	176	199	26	32	18	15	6	13	9	14	6	7.38	8.82	9.82	1.28	1.84	0.89	0.76	0.3	0.65	0.46	0.72	0.3	8.67333	1.33667	0.57	0.493333	-2.69795	4.6e-06	-0.208399	1	-1.43801	0.461211	-3.92755	0.000151503	gi|695058185|ref|XP_009417397.1|	PREDICTED: uncharacterized protein LOC103997792 [Musa acuminata subsp. malaccensis]	zma:100275564	hypothetical protein LOC100275564	--	--	--	--	--
Zoff030778	0	0	0	0	0	0	0	0	0	3	0	55	0	0	0	0	0	0	0	0	0	0.15	0	2.72	0.001	0.001	0.001	0.956667	0	1	9.90187	0.141121	9.90187	0.0363869	0	1	gi|675176381|ref|XP_008897075.1|	T-complex protein 1, alpha subunit [Phytophthora parasitica INRA-310]	pif:PITG_02567	T-complex protein 1 subunit alpha; K09493 T-complex protein 1 subunit alpha	7300868	[O] KOG0360 Chaperonin complex component, TCP-1 alpha subunit (CCT1)	sp|P12613|TCPA_DROME	T-complex protein 1 subunit alpha OS=Drosophila melanogaster GN=T-cp1 PE=2 SV=2	GO:0005737,t-complex protein 1 subunit alpha; GO:0006457,t-complex protein 1 subunit alpha; GO:0005524,t-complex protein 1 subunit alpha; GO:0051082,t-complex protein 1 subunit alpha
Zoff030821	2	25	11.05	0	0	0	3	0	0	1	2	0	0.1	1.25	0.55	0	0	0	0.15	0	0	0.05	0.1	0	0.633333	0.001	0.05	0.05	-9.30682	0.00620038	3.2e-16	1	5.64386	1	-3.66297	0.572653	gi|238502963|ref|XP_002382715.1|	conserved hypothetical protein [Aspergillus flavus NRRL3357]	afv:AFLA_005150	hypothetical protein	--	--	--	--	--
Zoff030862	0	0	0	20	2	5	0	0	0	40	9	14	0	0	0	0.98	0.11	0.25	0	0	0	2.03	0.47	0.69	0.001	0.446667	0.001	1.06333	8.80305	0.0229512	10.0544	0.0147859	1.25132	0.983605	0	1	gi|576981031|gb|EUC53774.1|	large subunit ribosomal protein, putative [Rhizoctonia solani AG-3 Rhs1AP]	lbc:LACBIDRAFT_185073	hypothetical protein; K02900 large subunit ribosomal protein L27Ae	YGL103w	[J] KOG1742 60s ribosomal protein L15/L27	sp|P08978|RL28_NEUCR	60S ribosomal protein L28 OS=Neurospora crassa (strain ATCC 24698 / 74-OR23-1A / CBS 708.71 / DSM 1257 / FGSC 987) GN=rpl-28 PE=2 SV=1	GO:0005840,60s ribosomal protein l28; GO:0003735,60s ribosomal protein l28; GO:0006412,60s ribosomal protein l28
Zoff031004	0	1	1	7	4	36	1	0	8	1	0	0	0	0.05	0.05	0.34	0.23	1.79	0.05	0	0.4	0.05	0	0	0.0333333	0.786667	0.15	0.0166667	4.56071	0.0158071	-3.16993	1	-5.56071	0.0171668	2.16993	1	gi|656909201|gb|KEF54911.1|	hypothetical protein A1O9_09354 [Exophiala aquamarina CBS 119918]	ure:UREG_03233	hypothetical protein	YPL019c_1	[P] KOG1161 Protein involved in vacuolar polyphosphate accumulation, contains SPX domain	sp|Q02725|VTC3_YEAST	Vacuolar transporter chaperone 3 OS=Saccharomyces cerevisiae (strain ATCC 204508 / S288c) GN=VTC3 PE=1 SV=1	--
Zoff031022	0	0	0	76	6	13.85	0	0	0	0	0	1	0	0	0	3.74	0.34	0.69	0	0	0	0	0	0.05	0.001	1.59	0.001	0.0166667	10.6348	5.33e-05	4.05889	1	-6.57592	0.0011686	0	1	gi|639554808|gb|KDN33514.1|	hypothetical protein RSAG8_13398, partial [Rhizoctonia solani AG-8 WAC10335]	lbc:LACBIDRAFT_294450	hypothetical protein	--	--	--	--	--
Zoff031398	0	0	0	1	2	37	2	0	7	1	0	0	0	0	0	0.05	0.11	1.84	0.1	0	0.35	0.05	0	0	0.001	0.666667	0.15	0.0166667	9.38082	0.0296526	-3.16993	1	-5.32193	0.105071	7.22882	1	gi|656916691|gb|KEF62269.1|	hypothetical protein A1O9_00241 [Exophiala aquamarina CBS 119918]	cim:CIMG_01854	hypothetical protein	--	--	--	--	--
Zoff031994	0	0	0	10	2	7	0	0	0	4	1	1	0	0	0	0.49	0.11	0.35	0	0	0	0.2	0.05	0.05	0.001	0.316667	0.001	0.1	8.30682	0.0409906	6.64386	1	-1.66297	0.959408	0	1	gi|639563565|gb|KDN41202.1|	hypothetical protein RSAG8_07616, partial [Rhizoctonia solani AG-8 WAC10335]	--	--	--	--	--	--	--
Zoff032159	0	0	0	9	2	9	0	0	0	2	0	3	0	0	0	0.44	0.11	0.45	0	0	0	0.1	0	0.15	0.001	0.333333	0.001	0.0833333	8.38082	0.0339653	6.38082	1	-2	0.778164	0	1	gi|471914539|emb|CCO26716.1|	hypothetical protein BN14_00747 [Rhizoctonia solani AG-1 IB]	ppl:POSPLDRAFT_90475	hypothetical protein	--	--	--	--	--
Zoff032254	0	0	0	0	0	0	0	0	0	18	0	45	0	0	0	0	0	0	0	0	0	0.91	0	2.22	0.001	0.001	0.001	1.04333	0	1	10.027	0.0723822	10.027	0.0114508	0	1	gi|570314958|gb|ETO62906.1|	hypothetical protein F444_19256, partial [Phytophthora parasitica P1976]	pif:PITG_22708	elicitin, putative	--	--	sp|Q1ESR5|ELI1_PYTOL	Elicitin-like protein 1 OS=Pythium oligandrum GN=POD-1 PE=2 SV=1	--
Zoff032357	0	0	0	15	3	3	0	0	0	0	0	0	0	0	0	0.74	0.17	0.15	0	0	0	0	0	0	0.001	0.353333	0.001	0.001	8.46489	0.0452688	0	1	-8.46489	0.0584787	0	1	gi|639565210|gb|KDN42781.1|	hypothetical protein RSAG8_06535, partial [Rhizoctonia solani AG-8 WAC10335]	scm:SCHCODRAFT_81904	hypothetical protein	Hs13540509	[O] KOG1039 Predicted E3 ubiquitin ligase	sp|Q6GLT5|MKRN1_XENLA	Probable E3 ubiquitin-protein ligase makorin-1 OS=Xenopus laevis GN=mkrn1 PE=2 SV=1	GO:0046872,zf-ccch domain protein
Zoff032495	2	0	0	2	1.28	35	1	0	4	0	0	0	0.1	0	0	0.1	0.07	1.74	0.05	0	0.2	0	0	0	0.0333333	0.636667	0.0833333	0.001	4.2555	0.165027	-6.38082	1	-9.31439	0.0419421	1.32193	1	gi|656915714|gb|KEF61293.1|	hypothetical protein A1O9_02858 [Exophiala aquamarina CBS 119918]	cpw:CPC735_031250	WD domain, G-beta repeat containing protein	Hs22044271	[TU] KOG1786 Lysosomal trafficking regulator LYST and related BEACH and WD40 repeat proteins	sp|Q7LKZ7|BPH1_SCHPO	Beige protein homolog 1 OS=Schizosaccharomyces pombe (strain 972 / ATCC 24843) GN=lvs1 PE=1 SV=2	--
Zoff032504	0	0	0	3	1	26	0	0	6	0	0	0	0	0	0	0.15	0.06	1.29	0	0	0.3	0	0	0	0.001	0.5	0.1	0.001	8.96578	0.0407098	-6.64386	1	-8.96578	0.0581308	6.64386	1	gi|628280852|ref|XP_007753763.1|	hypothetical protein A1O7_01536 [Cladophialophora yegresii CBS 114405]	cpw:CPC735_020820	LSM domain containing protein	Hs14150161	[K] KOG3168 U1 snRNP component	sp|Q9BRA0|LSMD1_HUMAN	N-alpha-acetyltransferase 38, NatC auxiliary subunit OS=Homo sapiens GN=NAA38 PE=1 SV=1	--
Zoff032596	0	0	0	0	0	0	0	0	0	13	0	109.7	0	0	0	0	0	0	0	0	0	0.66	0	5.42	0.001	0.001	0.001	2.02667	0	1	10.9849	0.0470924	10.9849	0.00537646	0	1	gi|675188619|ref|XP_008903194.1|	hypothetical protein PPTG_10282 [Phytophthora parasitica INRA-310]	pif:PITG_01082	ran-specific GTPase-activating protein, putative	YDR002w	[U] KOG0864 Ran-binding protein RANBP1 and related RanBD domain proteins	sp|P41920|YRB1_YEAST	Ran-specific GTPase-activating protein 1 OS=Saccharomyces cerevisiae (strain ATCC 204508 / S288c) GN=YRB1 PE=1 SV=1	GO:0009987,ran-specific gtpase-activating; GO:0044699,ran-specific gtpase-activating; GO:0046907,ran-specific gtpase-activating
Zoff032599	0	0	1	36.68	3	14.45	0	0	1	7	1	1	0	0	0.05	1.81	0.17	0.72	0	0	0.05	0.36	0.05	0.05	0.0166667	0.9	0.0166667	0.153333	5.75489	0.00295974	3.20163	1	-2.55325	0.293229	0	1	gi|660968707|gb|KEP52732.1|	putative CCT2-chaperonin of the TCP1 ring complex, cytosolic protein [Rhizoctonia solani 123E]	scm:SCHCODRAFT_12393	hypothetical protein; K09494 T-complex protein 1 subunit beta	SPAC1D4.04	[O] KOG0363 Chaperonin complex component, TCP-1 beta subunit (CCT2)	sp|Q10147|TCPB_SCHPO	Probable T-complex protein 1 subunit beta OS=Schizosaccharomyces pombe (strain 972 / ATCC 24843) GN=cct2 PE=3 SV=1	GO:0005737,t-complex protein 1; GO:0006457,t-complex protein 1; GO:0005524,t-complex protein 1; GO:0051082,t-complex protein 1
Zoff032631	0	0	0	18	4	4	0	0	1	5	4	2	0	0	0	0.89	0.23	0.2	0	0	0.05	0.25	0.21	0.1	0.001	0.44	0.0166667	0.186667	8.78136	0.0167193	3.48543	1	-1.23704	1	4.05889	1	gi|576994629|gb|EUC67224.1|	ATP-dependent DNA helicase recQ, putative [Rhizoctonia solani AG-3 Rhs1AP]	ppl:POSPLDRAFT_96186	hypothetical protein	--	--	--	--	GO:0008152,atp-dependent dna helicase recq
Zoff032925	0	0	0	3	2	25	1	0	1	0	0	0	0	0	0	0.15	0.11	1.24	0.05	0	0.05	0	0	0	0.001	0.5	0.0333333	0.001	8.96578	0.0280317	-5.05889	1	-8.96578	0.0422524	5.05889	1	gi|684160037|ref|XP_009153896.1|	tubulin gamma chain [Exophiala dermatitidis NIH/UT8656]	ang:ANI_1_2054074	An08g06460; tubulin gamma chain	SPBC32F12.04	[Z] KOG1374 Gamma tubulin	sp|P18695|TBG_EMENI	Tubulin gamma chain OS=Emericella nidulans (strain FGSC A4 / ATCC 38163 / CBS 112.46 / NRRL 194 / M139) GN=mipA PE=2 SV=3	GO:0007067,tubulin gamma chain; GO:0005525,tubulin gamma chain; GO:0000091,tubulin gamma chain; GO:0031122,tubulin gamma chain; GO:0006184,tubulin gamma chain; GO:0005874,tubulin gamma chain; GO:0051417,tubulin gamma chainGO:0006629,tubulin gamma chainGO:0005816,tubulin gamma chainGO:0000930,tubulin gamma chainGO:0008081,tubulin gamma chainGO:0003924,tubulin gamma chainGO:0007093,tubulin gamma ch…
Zoff033010	2	0	0	3	1	35	1	0	5	0	0	0	0.1	0	0	0.15	0.06	1.74	0.05	0	0.25	0	0	0	0.0333333	0.65	0.1	0.001	4.2854	0.151628	-6.64386	1	-9.3443	0.0363333	1.58496	1	gi|628296994|ref|XP_007733649.1|	Ras-like protein Rab-6B [Capronia epimyces CBS 606.96]	nfi:NFIA_090800	rab6	7297923	[U] KOG0094 GTPase Rab6/YPT6/Ryh1, small G protein superfamily	sp|O18334|RAB6_DROME	Ras-related protein Rab6 OS=Drosophila melanogaster GN=Rab6 PE=1 SV=1	GO:0072686,ras-like protein rab-6b; GO:0016020,ras-like protein rab-6b; GO:0006913,ras-like protein rab-6b; GO:0005525,ras-like protein rab-6b; GO:0006184,ras-like protein rab-6b; GO:0006886,ras-like protein rab-6b; GO:0007264,ras-like protein rab-6bGO:0042729,ras-like protein rab-6bGO:0003924,ras-like protein rab-6bGO:0030472,ras-like protein rab-6b
Zoff033066	6	3	5	4	4	3	21	12	9	31	17	24	0.3	0.15	0.25	0.2	0.23	0.15	1.06	0.59	0.45	1.57	0.88	1.19	0.233333	0.193333	0.7	1.21333	-0.271302	1	0.793549	1	2.64981	0.021844	1.58496	1	gi|695044074|ref|XP_009409766.1|	PREDICTED: probable alpha,alpha-trehalose-phosphate synthase [UDP-forming] 9 [Musa acuminata subsp. malaccensis]	rcu:RCOM_0993370	trehalose-6-phosphate synthase, putative (EC:2.4.1.15 3.1.3.12); K00697 alpha,alpha-trehalose-phosphate synthase (UDP-forming) [EC:2.4.1.15]; K01087 trehalose-phosphatase [EC:3.1.3.12]	At1g23870	[G] KOG1050 Trehalose-6-phosphate synthase component TPS1 and related subunits	sp|Q9LRA7|TPS9_ARATH	Probable alpha,alpha-trehalose-phosphate synthase [UDP-forming] 9 OS=Arabidopsis thaliana GN=TPS9 PE=2 SV=1	GO:0016757,probable -trehalose-phosphate synthase; GO:0005829,probable -trehalose-phosphate synthase; GO:0005992,probable -trehalose-phosphate synthase; GO:0005739,probable -trehalose-phosphate synthase
Zoff033258	5	1	2	9	5	26	2	1	8	0	1	0	0.25	0.05	0.1	0.44	0.29	1.29	0.1	0.05	0.4	0	0.05	0	0.133333	0.673333	0.183333	0.0166667	2.33628	0.232034	-3.45943	1	-5.33628	0.0160431	0.459432	1	gi|628276229|ref|XP_007752663.1|	hypothetical protein A1O7_00432 [Cladophialophora yegresii CBS 114405]	aor:AOR_1_1862054	AO090011000771; ATP-dependent RNA helicase (Hrh1); K14781 ATP-dependent RNA helicase DHR2 [EC:3.6.4.13]	SPAC2G11.11c	[A] KOG0922 DEAH-box RNA helicase	sp|Q03319|PRH1_SCHPO	Probable ATP-dependent RNA helicase prh1 OS=Schizosaccharomyces pombe (strain 972 / ATCC 24843) GN=prh1 PE=3 SV=2	GO:0097159,atp-dependent rna helicase; GO:1901363,atp-dependent rna helicase; GO:0016787,atp-dependent rna helicase
Zoff033460	17.25	31.86	33	7	4	8.45	12.66	4	6.44	11.96	9	10	0.85	1.6	1.63	0.34	0.23	0.42	0.64	0.2	0.32	0.61	0.47	0.49	1.36	0.33	0.386667	0.523333	-2.04307	0.0351853	0.43664	1	0.665264	1	-1.81444	0.678664	gi|672112727|ref|XP_008807336.1|	PREDICTED: 4-hydroxy-3-methylbut-2-en-1-yl diphosphate synthase, chloroplastic [Phoenix dactylifera]	zma:542690	pco116062, Hds1; LOC542690; K03526 (E)-4-hydroxy-3-methylbut-2-enyl-diphosphate synthase [EC:1.17.7.1]	--	--	sp|Q6K8J4|ISPG_ORYSJ	4-hydroxy-3-methylbut-2-en-1-yl diphosphate synthase, chloroplastic OS=Oryza sativa subsp. japonica GN=ISPG PE=2 SV=1	GO:0044272,4-hydroxy-3-methylbut-2-en-1-yl diphosphate chloroplastic; GO:0009108,4-hydroxy-3-methylbut-2-en-1-yl diphosphate chloroplastic; GO:0009744,4-hydroxy-3-methylbut-2-en-1-yl diphosphate chloroplastic; GO:0008652,4-hydroxy-3-methylbut-2-en-1-yl diphosphate chloroplastic; GO:0009695,4-hydroxy-3-methylbut-2-en-1-yl diphosphate chloroplastic; GO:0009697,4-hydroxy-3-methylbut-2-en-1-yl diphos…
Zoff033548	4	0	0	12	3	41	0	0	5	0	1	0	0.2	0	0	0.59	0.17	2.03	0	0	0.25	0	0.05	0	0.0666667	0.93	0.0833333	0.0166667	3.80219	0.0562914	-2.32193	1	-5.80219	0.00933009	0.321928	1	gi|470242043|ref|XP_004354655.1|	actin binding protein [Dictyostelium fasciculatum]	ddi:DDB_G0293898	coaA; actin binding protein	7293507	[Z] KOG3655 Drebrins and related actin binding proteins	sp|P34121|COAA_DICDI	Coactosin OS=Dictyostelium discoideum GN=coaA PE=1 SV=1	GO:0003779,actin binding protein; GO:0005622,actin binding protein
Zoff033779	1	4	4	3	1	84	0	0	2	1	0	0	0.05	0.2	0.2	0.15	0.06	4.17	0	0	0.1	0.05	0	0	0.15	1.46	0.0333333	0.0166667	3.28293	0.218721	-1	1	-6.45286	0.0220802	-2.16993	1	gi|628255103|ref|XP_007729375.1|	hypothetical protein A1O3_01037 [Capronia epimyces CBS 606.96]	ure:UREG_02056	hypothetical protein	--	--	--	--	--
Zoff034106	0	0	1	0	0	1	0	0	0	4	0	80	0	0	0.05	0	0	0.05	0	0	0	0.2	0	3.96	0.0166667	0.0166667	0.001	1.38667	0	1	10.4374	0.083907	6.37851	0.0418239	-4.05889	1	gi|695426364|ref|XP_009529403.1|	hypothetical protein PHYSODRAFT_561367 [Phytophthora sojae]	pif:PITG_00625	monooxygenase, putative	--	--	--	--	GO:0004497,antibiotic biosynthesis monooxygenase; GO:0055114,antibiotic biosynthesis monooxygenase
Zoff034309	47	60.17	59	49.81	58.48	124.14	56	34.78	68.59	13	18	21	2.31	3.01	2.91	2.45	3.36	6.16	2.83	1.72	3.45	0.66	0.93	1.04	2.74333	3.99	2.66667	0.876667	0.540459	1	-1.60494	0.622956	-2.18629	0.0299408	-0.0408924	1	gi|695066373|ref|XP_009380076.1|	PREDICTED: microtubule-associated protein 70-1-like [Musa acuminata subsp. malaccensis]	rcu:RCOM_0598030	Myosin heavy chain, clone, putative	--	--	sp|Q2QLI6|MP701_ORYSJ	Microtubule-associated protein 70-1 OS=Oryza sativa subsp. japonica GN=MAP70.1 PE=2 SV=1	GO:0007010,microtubule-associated protein 70-1-like; GO:0008017,microtubule-associated protein 70-1-like
Zoff034310	0	1.83	0	13.19	15.52	11.86	0	9.22	8.41	0	0	0	0	0.09	0	0.65	0.89	0.59	0	0.46	0.42	0	0	0	0.03	0.71	0.293333	0.001	4.56478	0.00246315	-8.1964	0.508026	-9.47168	0.00130835	3.28951	1	gi|695033259|ref|XP_009404137.1|	PREDICTED: microtubule-associated protein 70-1 [Musa acuminata subsp. malaccensis]	rcu:RCOM_0598030	Myosin heavy chain, clone, putative	--	--	sp|Q2QLI6|MP701_ORYSJ	Microtubule-associated protein 70-1 OS=Oryza sativa subsp. japonica GN=MAP70.1 PE=2 SV=1	GO:0007010,microtubule-associated protein 70-1-like; GO:0008017,microtubule-associated protein 70-1-like
Zoff034522	4	13	5	12	12	13	6	9	7	0	0	2	0.2	0.65	0.25	0.59	0.69	0.65	0.3	0.45	0.35	0	0	0.1	0.366667	0.643333	0.366667	0.0333333	0.811097	1	-3.45943	0.537564	-4.27053	0.0219558	-1.6e-16	1	gi|672132234|ref|XP_008789696.1|	PREDICTED: zinc finger protein CONSTANS-LIKE 4 isoform X1 [Phoenix dactylifera]	vvi:100244502	hypothetical protein LOC100244502	At5g57660	[K] KOG1601 GATA-4/5/6 transcription factors	sp|Q9FHH8|COL5_ARATH	Zinc finger protein CONSTANS-LIKE 5 OS=Arabidopsis thaliana GN=COL5 PE=2 SV=2	--
Zoff034576	8	26	7	141.11	119	70	22	14	28	4	6	3	0.39	1.3	0.35	6.95	6.84	3.47	1.11	0.69	1.41	0.2	0.31	0.15	0.68	5.75333	1.07	0.22	3.08079	0.000168547	-2.28204	0.336493	-4.70882	9.88e-07	0.654004	1	gi|695038053|ref|XP_009406529.1|	PREDICTED: uncharacterized protein LOC103989421 [Musa acuminata subsp. malaccensis]	pop:POPTR_177802	hypothetical protein	--	--	--	--	--
Zoff034978	0	0	0	0	0	0	0	0	0	2	3	34	0	0	0	0	0	0	0	0	0	0.1	0.16	1.68	0.001	0.001	0.001	0.646667	0	1	9.33688	0.124298	9.33688	0.0273903	0	1	gi|301115304|ref|XP_002905381.1|	conserved hypothetical protein [Phytophthora infestans T30-4]	pif:PITG_04638	hypothetical protein	YDL001w	[S] KOG2861 Uncharacterized conserved protein	sp|Q03441|RMD1_YEAST	Sporulation protein RMD1 OS=Saccharomyces cerevisiae (strain ATCC 204508 / S288c) GN=RMD1 PE=1 SV=1	--
Zoff035633	1	0	0	1	1	0	1	0	1	10	0	149	0.05	0	0	0.05	0.06	0	0.05	0	0.05	0.51	0	7.37	0.0166667	0.0366667	0.0333333	2.62667	1.1375	1	6.30012	0.0931833	6.16262	0.0190328	1	1	gi|301100712|ref|XP_002899445.1|	conserved hypothetical protein [Phytophthora infestans T30-4]	pif:PITG_13750	hypothetical protein	--	--	--	--	--
Zoff035867	5	5	17	0	0	0	0	0	1	0	0	2	0.25	0.25	0.84	0	0	0	0	0	0.05	0	0	0.1	0.446667	0.001	0.0166667	0.0333333	-8.80305	0.0123766	1	1	5.05889	1	-4.74416	0.332926	gi|590609336|ref|XP_007021509.1|	Uncharacterized protein TCM_031541 [Theobroma cacao]	pop:POPTR_794653	hypothetical protein	At2g15650	[R] KOG0017 FOG: Transposon-encoded proteins with TYA, reverse transcriptase, integrase domains in various combinations	--	--	GO:0044260,uncharacterized protein tcm_031836; GO:0043167,uncharacterized protein tcm_031836; GO:1901363,uncharacterized protein tcm_031836; GO:0044238,uncharacterized protein tcm_031836; GO:0097159,uncharacterized protein tcm_031836; GO:0016772,uncharacterized protein tcm_031836
Zoff036057	1	1	0	0	0	0	0	1	0	17	0	312	0.05	0.05	0	0	0	0	0	0.05	0	0.86	0	15.42	0.0333333	0.001	0.0166667	5.42667	-5.05889	1	8.34696	0.0458609	12.4059	0.00240557	-1	1	gi|675167167|ref|XP_008892468.1|	hypothetical protein PPTG_02894 [Phytophthora parasitica INRA-310]	pif:PITG_17406	enoyl-CoA hydratase, mitochondrial precursor	Hs12707570	[I] KOG1680 Enoyl-CoA hydratase	sp|Q8BH95|ECHM_MOUSE	Enoyl-CoA hydratase, mitochondrial OS=Mus musculus GN=Echs1 PE=1 SV=1	GO:0008152,enoyl- hydratase; GO:0004300,enoyl- hydratase
Zoff036776	118	84	94	30	20	41	95	47	83	34	41	80	5.81	4.21	4.64	1.48	1.15	2.03	4.8	2.33	4.18	1.72	2.12	3.96	4.88667	1.55333	3.77	2.6	-1.65348	0.0171255	-0.536053	1	0.743144	1	-0.374286	1	gi|672161304|ref|XP_008800462.1|	PREDICTED: 40S ribosomal protein SA-like [Phoenix dactylifera]	osa:4343909	Os07g0616600; K02998 small subunit ribosomal protein SAe	At1g72370	[J] KOG0830 40S ribosomal protein SA (P40)/Laminin receptor 1	sp|A5BUU4|RSSA_VITVI	40S ribosomal protein SA OS=Vitis vinifera GN=GSVIVT00034021001 PE=3 SV=1	GO:0006412,40s ribosomal protein sa-like; GO:0000461,40s ribosomal protein sa-like; GO:0006407,40s ribosomal protein sa-like; GO:0003735,40s ribosomal protein sa-like; GO:0022627,40s ribosomal protein sa-like; GO:0030686,40s ribosomal protein sa-like; GO:0000028,40s ribosomal protein sa-likeGO:0000447,40s ribosomal protein sa-like
Zoff037067	1.52	3.28	2.13	7.82	4.73	15.37	8.96	0	2.59	0	0	0.73	0.07	0.16	0.11	0.38	0.27	0.76	0.45	0	0.13	0	0	0.04	0.113333	0.47	0.193333	0.0133333	2.05209	0.406626	-3.85798	1	-5.13955	0.0392384	0.770518	1	gi|695016063|ref|XP_009394928.1|	PREDICTED: shikimate O-hydroxycinnamoyltransferase-like [Musa acuminata subsp. malaccensis]	pop:POPTR_587193	HCQ3; hydroxycinnamoyl CoA shikimate/quinate hydroxycinnamoyltransferase (EC:2.3.1.133)	--	--	sp|Q8GSM7|HST_TOBAC	Shikimate O-hydroxycinnamoyltransferase OS=Nicotiana tabacum GN=HST PE=1 SV=1	GO:0050789,hydroxycinnamoyl shikimate quinate hydroxycinnamoyl transferase; GO:0009699,hydroxycinnamoyl shikimate quinate hydroxycinnamoyl transferase; GO:0050737,hydroxycinnamoyl shikimate quinate hydroxycinnamoyl transferase; GO:0005737,hydroxycinnamoyl shikimate quinate hydroxycinnamoyl transferase; GO:0006950,hydroxycinnamoyl shikimate quinate hydroxycinnamoyl transferase
Zoff037068	13.48	31.72	23.87	53.18	48.27	91.63	16.04	42	137.41	0	6	1.27	0.66	1.59	1.18	2.62	2.77	4.55	0.81	2.08	6.92	0	0.31	0.06	1.14333	3.31333	3.27	0.123333	1.53504	0.0947783	-4.72866	0.0380833	-4.74765	5.9e-05	1.51604	1	gi|695016063|ref|XP_009394928.1|	PREDICTED: shikimate O-hydroxycinnamoyltransferase-like [Musa acuminata subsp. malaccensis]	pop:POPTR_554899	HCQ7; hydroxycinnamoyl CoA shikimate/quinate hydroxycinnamoyltransferase (EC:2.3.1.133); K13065 shikimate O-hydroxycinnamoyltransferase [EC:2.3.1.133]	--	--	sp|Q8GSM7|HST_TOBAC	Shikimate O-hydroxycinnamoyltransferase OS=Nicotiana tabacum GN=HST PE=1 SV=1	GO:0050789,shikimate o-hydroxycinnamoyltransferase-like; GO:0009699,shikimate o-hydroxycinnamoyltransferase-like; GO:0050737,shikimate o-hydroxycinnamoyltransferase-like; GO:0005737,shikimate o-hydroxycinnamoyltransferase-like; GO:0006950,shikimate o-hydroxycinnamoyltransferase-like
Zoff037083	18.17	10.8	26.03	7.88	11.59	9.41	13.9	16.48	14.84	57.8	40.62	45.27	0.89	0.54	1.28	0.39	0.67	0.47	0.7	0.82	0.75	2.93	2.1	2.24	0.903333	0.51	0.756667	2.42333	-0.824761	1	1.67926	0.515564	2.24842	0.0228418	-0.255601	1	gi|695024122|ref|XP_009399262.1|	PREDICTED: probable potassium transporter 11 [Musa acuminata subsp. malaccensis]	osa:4336979	Os04g0613900	--	--	sp|Q7XLC6|HAK11_ORYSJ	Probable potassium transporter 11 OS=Oryza sativa subsp. japonica GN=HAK11 PE=2 SV=3	GO:0006813,probable potassium transporter 11; GO:0016020,probable potassium transporter 11
Zoff037226	0	0	0	0	0	0	1	0	0	7	0	71.86	0	0	0	0	0	0	0.05	0	0	0.36	0	3.55	0.001	0.001	0.0166667	1.30333	0	1	6.2891	0.13778	10.348	0.013709	4.05889	1	gi|567960700|gb|ETK86250.1|	diaminopimelate decarboxylase [Phytophthora parasitica]	pif:PITG_13176	diaminopimelate decarboxylase, putative	At3g14390	[E] KOG0622 Ornithine decarboxylase	sp|P31851|TABA_PSESZ	Protein TabA OS=Pseudomonas syringae pv. tabaci GN=tabA PE=3 SV=1	GO:0006596,diaminopimelate decarboxylase; GO:0009089,diaminopimelate decarboxylase; GO:0008836,diaminopimelate decarboxylase
Zoff037274	0	0	0	0	0	0	0	0	1	10	0	156	0	0	0	0	0	0	0	0	0.05	0.51	0	7.71	0.001	0.001	0.0166667	2.74	0	1	7.36107	0.0723822	11.42	0.00525467	4.05889	1	gi|570960058|gb|ETP25037.1|	hypothetical protein F441_02084 [Phytophthora parasitica CJ01A1]	pif:PITG_09889	hypothetical protein	--	--	--	--	GO:0008152,hypothetical protein F443_22187 [Phytophthora parasitica P1569]
Zoff037484	0	0	0	25	2	6	0	0	0	3	1	0	0	0	0	1.23	0.11	0.3	0	0	0	0.15	0.05	0	0.001	0.546667	0.001	0.0666667	9.09452	0.0121054	6.05889	1	-3.03562	0.318141	0	1	gi|443917790|gb|ELU38430.1|	hypothetical protein AG1IA_07540 [Rhizoctonia solani AG-1 IA]	--	--	--	--	--	--	--
Zoff037503	0	0	0	0	0	0	1	0	0	7	0	77	0	0	0	0	0	0	0.05	0	0	0.36	0	3.81	0.001	0.001	0.0166667	1.39	0	1	6.38198	0.128566	10.4409	0.0125418	4.05889	1	gi|695390199|ref|XP_009519648.1|	hypothetical protein PHYSODRAFT_359251 [Phytophthora sojae]	pif:PITG_11198	nucleolar GTP-binding protein 1; K06943 nucleolar GTP-binding protein	At1g50920	[R] KOG1490 GTP-binding protein CRFG/NOG1 (ODN superfamily)	sp|Q9C6I8|NOG1_ARATH	Nucleolar GTP-binding protein 1 OS=Arabidopsis thaliana GN=At1g50920 PE=2 SV=1	GO:0005730,nucleolar gtp-binding protein 1; GO:0005525,nucleolar gtp-binding protein 1; GO:0042254,nucleolar gtp-binding protein 1
Zoff038116	4	25	4	10	5	2	1	1	2	23	56	20	0.2	1.25	0.2	0.49	0.29	0.1	0.05	0.05	0.1	1.17	2.9	0.99	0.55	0.293333	0.0666667	1.68667	-0.906891	1	4.66107	0.0176437	2.52356	0.0565148	-3.04439	0.711372	gi|684162713|ref|XP_009155234.1|	MFS transporter, SP family, galactose:H+ symporter [Exophiala dermatitidis NIH/UT8656]	cim:CIMG_05949	hypothetical protein	At3g18830	[R] KOG0254 Predicted transporter (major facilitator superfamily)	sp|Q8VZ80|PLT5_ARATH	Polyol transporter 5 OS=Arabidopsis thaliana GN=PLT5 PE=1 SV=2	GO:0022891,sugar transporter; GO:0055085,sugar transporter; GO:0046856,sugar transporter; GO:0008643,sugar transporter; GO:0016021,sugar transporter
Zoff038168	4	4	1	4	3	47	0	0	3	0	1	1	0.2	0.2	0.05	0.2	0.17	2.33	0	0	0.15	0	0.05	0.05	0.15	0.9	0.05	0.0333333	2.58496	0.319564	-0.584963	1	-4.75489	0.0433957	-1.58496	1	gi|656913837|gb|KEF59417.1|	hypothetical protein A1O9_04261 [Exophiala aquamarina CBS 119918]	ure:UREG_01477	hypothetical protein	--	--	--	--	--
Zoff038169	0	0	1	2	4	26	1	0	6	0	0	0	0	0	0.05	0.1	0.23	1.29	0.05	0	0.3	0	0	0	0.0166667	0.54	0.116667	0.001	5.01792	0.0582341	-6.86625	1	-9.07682	0.0296613	2.80735	1	gi|684174065|ref|XP_009160901.1|	acid phosphatase [Exophiala dermatitidis NIH/UT8656]	ssl:SS1G_06967	hypothetical protein ; K01078 acid phosphatase [EC:3.1.3.2]	SPBC4.06	[I] KOG3720 Lysosomal & prostatic acid phosphatases	sp|Q9USS6|PPA4_SCHPO	Probable acid phosphatase SPBC4.06 OS=Schizosaccharomyces pombe (strain 972 / ATCC 24843) GN=SPBC4.06 PE=3 SV=1	GO:0016311,acid phosphatase; GO:0003993,acid phosphatase
Zoff038202	2	0	1	10	5	38	0	0	5	0	0	1	0.1	0	0.05	0.49	0.29	1.89	0	0	0.25	0	0	0.05	0.05	0.89	0.0833333	0.0166667	4.15381	0.0122565	-2.32193	1	-5.73877	0.0075291	0.736966	1	gi|656911430|gb|KEF57063.1|	hypothetical protein A1O9_07253 [Exophiala aquamarina CBS 119918]	afv:AFLA_014490	hypothetical protein	--	--	sp|P05085|ARGR2_YEAST	Arginine metabolism regulation protein II OS=Saccharomyces cerevisiae (strain ATCC 204508 / S288c) GN=ARG81 PE=1 SV=3	GO:0009987,arginine metabolism regulation protein ii
Zoff038270	1.24	0	0	5	2	115.31	0	0	3.57	0	0	0	0.06	0	0	0.25	0.11	5.72	0	0	0.18	0	0	0	0.02	2.02667	0.06	0.001	6.66297	0.0047381	-5.90689	1	-10.9849	0.00275822	1.58496	1	gi|656907732|gb|KEF53469.1|	hypothetical protein A1O9_10444 [Exophiala aquamarina CBS 119918]	act:ACLA_023120	SCP-like extracellular protein, putative	YJL078c_1	[S] KOG3017 Defense-related protein containing SCP domain	sp|P47033|PRY3_YEAST	Cell wall protein PRY3 OS=Saccharomyces cerevisiae (strain ATCC 204508 / S288c) GN=PRY3 PE=1 SV=1	GO:0005576,pr-1-like protein
Zoff038277	0	0	0	1	0	0	0	0	0	13	4	184	0	0	0	0.05	0	0	0	0	0	0.66	0.21	9.1	0.001	0.0166667	0.001	3.32333	4.05889	1	11.6984	0.0120062	7.63952	0.00135753	0	1	gi|567945767|gb|ETK71578.1|	hypothetical protein, variant [Phytophthora parasitica]	pif:PITG_03843	hypothetical protein; K11599 proteasome maturation protein	At1g67250	[O] KOG3061 Proteasome maturation factor	sp|Q3SZV5|POMP_BOVIN	Proteasome maturation protein OS=Bos taurus GN=POMP PE=2 SV=1	--
Zoff038342	7.61	1.49	15.71	5.3	0	11	10	8.38	16	48.04	24.2	70.68	0.37	0.07	0.78	0.26	0	0.55	0.51	0.42	0.81	2.44	1.25	3.49	0.406667	0.27	0.58	2.39333	-0.590887	1	2.0449	0.341355	3.14799	0.021049	0.512206	1	gi|695056043|ref|XP_009416227.1|	PREDICTED: uncharacterized protein LOC103996897 isoform X1 [Musa acuminata subsp. malaccensis]	--	--	--	--	--	--	--
Zoff038376	0	0	0	15.27	4	5	0	0	1	2.5	0	0	0	0	0	0.75	0.23	0.25	0	0	0.05	0.13	0	0	0.001	0.41	0.0166667	0.0433333	8.67948	0.0163756	1.37851	1	-3.24207	0.204057	4.05889	1	gi|443920768|gb|ELU40611.1|	translation initiation factor eIF3 subunit domain-containing protein [Rhizoctonia solani AG-1 IA]	lbc:LACBIDRAFT_318032	hypothetical protein; K03245 translation initiation factor 3 subunit J	At1g66070	[J] KOG4813 Translation initiation factor eIF3, p35 subunit	sp|Q5I0B5|EIF3J_XENTR	Eukaryotic translation initiation factor 3 subunit J OS=Xenopus tropicalis GN=eif3j PE=2 SV=2	GO:0005852,translation initiation factor eif3 subunit; GO:0016282,translation initiation factor eif3 subunit; GO:0033290,translation initiation factor eif3 subunit; GO:0006446,translation initiation factor eif3 subunit; GO:0001731,translation initiation factor eif3 subunit; GO:0003743,translation initiation factor eif3 subunit
Zoff038427	0	0	0	0	0	0	0	0	0	5	0	41	0	0	0	0	0	0	0	0	0	0.25	0	2.03	0.001	0.001	0.001	0.76	0	1	9.56986	0.163038	9.56986	0.0413195	0	1	gi|675199407|ref|XP_008908588.1|	hypothetical protein PPTG_13886 [Phytophthora parasitica INRA-310]	pif:PITG_14638	hypothetical protein	--	--	--	--	--
Zoff038437	28	0	6	0	0	0	0	0	0	1	0	0	1.38	0	0.3	0	0	0	0	0	0	0.05	0	0	0.56	0.001	0.001	0.0166667	-9.12928	0.0481334	4.05889	1	4.05889	1	-9.12928	0.321332	gi|576992520|gb|EUC65195.1|	ser-thr-rich glycosyl-phosphatidyl-inositol-anchored membrane family protein [Rhizoctonia solani AG-3 Rhs1AP]	lbc:LACBIDRAFT_292821	GPI-anchored small secreted protein	--	--	sp|O74947|YJBA_SCHPO	Uncharacterized protein C553.10 OS=Schizosaccharomyces pombe (strain 972 / ATCC 24843) GN=SPCC553.10 PE=3 SV=1	--
Zoff038456	44	101	16	410	351	253	66	68	100	13	32	10	2.17	5.06	0.79	20.18	20.16	12.55	3.34	3.37	5.04	0.66	1.65	0.49	2.67333	17.63	3.91667	0.933333	2.72132	0.00162727	-2.06916	0.318012	-4.2395	2.41e-06	0.550987	1	gi|695057740|ref|XP_009417159.1|	PREDICTED: uncharacterized protein LOC103997606 [Musa acuminata subsp. malaccensis]	vvi:100247715	hypothetical protein LOC100247715	--	--	--	--	--
Zoff038512	1	0	1	4	5	51	1	2	11	0	0	0	0.05	0	0.05	0.2	0.29	2.53	0.05	0.1	0.55	0	0	0	0.0333333	1.00667	0.233333	0.001	4.91648	0.0135347	-7.86625	0.556917	-9.97537	0.00466796	2.80735	1	gi|628329317|ref|XP_007744064.1|	hypothetical protein A1O5_05273 [Cladophialophora psammophila CBS 110553]	aor:AOR_1_2800174	AO090005001598; hypothetical protein	--	--	--	--	--
Zoff038563	5	2	11	0	2	1	1	4	15	16	20	24.64	0.25	0.1	0.54	0	0.11	0.05	0.05	0.2	0.76	0.81	1.03	1.22	0.296667	0.0533333	0.336667	1.02	-2.47573	0.533102	1.59918	1	4.25739	0.00259519	0.182478	1	gi|695068150|ref|XP_009381009.1|	PREDICTED: purple acid phosphatase 3-like [Musa acuminata subsp. malaccensis]	zma:100284727	pco072542; LOC100284727	At1g14700	[O] KOG2679 Purple (tartrate-resistant) acid phosphatase	sp|Q8H129|PPA3_ARATH	Purple acid phosphatase 3 OS=Arabidopsis thaliana GN=PAP3 PE=2 SV=1	GO:0016311,purple acid phosphatase 17-like; GO:0016023,purple acid phosphatase 17-like; GO:0003993,purple acid phosphatase 17-like
Zoff038726	0	0	0	0	0	0	0	1	0	2	1	54	0	0	0	0	0	0	0	0.05	0	0.1	0.05	2.67	0.001	0.001	0.0166667	0.94	0	1	5.81762	0.19343	9.87652	0.0239071	4.05889	1	gi|695414734|ref|XP_009526381.1|	hypothetical protein PHYSODRAFT_300428 [Phytophthora sojae]	--	--	--	--	--	--	--
Zoff038783	0	0	0	39	9	16	0	0	0	2.49	0	3	0	0	0	1.92	0.52	0.79	0	0	0	0.13	0	0.15	0.001	1.07667	0.001	0.0933333	10.0724	1.59e-05	6.54432	1	-3.52804	0.0175902	0	1	gi|576983932|gb|EUC56675.1|	processing peptidase alpha subunit, putative [Rhizoctonia solani AG-3 Rhs1AP]	lbc:LACBIDRAFT_320873	hypothetical protein; K01412 mitochondrial processing peptidase [EC:3.4.24.64]	YHR024c	[O] KOG2067 Mitochondrial processing peptidase, alpha subunit	sp|P23955|MPPA_NEUCR	Mitochondrial-processing peptidase subunit alpha OS=Neurospora crassa (strain ATCC 24698 / 74-OR23-1A / CBS 708.71 / DSM 1257 / FGSC 987) GN=mpp PE=1 SV=2	GO:0046872,mitochondrial processing peptidase; GO:0008152,mitochondrial processing peptidase; GO:0003824,mitochondrial processing peptidase
Zoff038920	0	0	0	0	0	0	1	0	0	18	0	296	0	0	0	0	0	0	0.05	0	0	0.91	0	14.63	0.001	0.001	0.0166667	5.18	0	1	8.27984	0.0459154	12.3387	0.00235679	4.05889	1	gi|635367222|emb|CCI44554.1|	unnamed protein product [Albugo candida]	pif:PITG_11630	eukaryotic translation initiation factor 1A, putative; K03236 translation initiation factor 1A	Hs4503499	[J] KOG3403 Translation initiation factor 1A (eIF-1A)	sp|O14602|IF1AY_HUMAN	Eukaryotic translation initiation factor 1A, Y-chromosomal OS=Homo sapiens GN=EIF1AY PE=1 SV=4	GO:0006413,eukaryotic translation initiation factor x-chromosomal; GO:0005622,eukaryotic translation initiation factor x-chromosomal; GO:0003743,eukaryotic translation initiation factor x-chromosomal; GO:0008270,eukaryotic translation initiation factor x-chromosomal
Zoff039124	2	2	0	15	5	18	3	0	3	0	2	0	0.1	0.1	0	0.74	0.29	0.89	0.15	0	0.15	0	0.1	0	0.0666667	0.64	0.1	0.0333333	3.26303	0.0375055	-1.58496	1	-4.26303	0.0326121	0.584963	1	gi|656905391|gb|KEF51142.1|	hypothetical protein A1O9_12756 [Exophiala aquamarina CBS 119918]	--	--	--	--	--	--	--
Zoff039572	2	6	2	6	5	72	0	0	3	0	1	0	0.1	0.3	0.1	0.3	0.29	3.57	0	0	0.15	0	0.05	0	0.166667	1.38667	0.05	0.0166667	3.05658	0.105904	-1.58496	1	-6.37851	0.00520227	-1.73697	1	gi|656907918|gb|KEF53654.1|	hypothetical protein A1O9_10054 [Exophiala aquamarina CBS 119918]	pno:SNOG_02722	hypothetical protein	--	--	--	--	--
Zoff039642	7.74	0	5.84	3.5	0	9	4.67	12.02	5.21	35.7	34.27	21.92	0.38	0	0.29	0.17	0	0.45	0.24	0.6	0.26	1.81	1.77	1.08	0.223333	0.206667	0.366667	1.55333	-0.111893	1	2.08283	0.384027	2.90999	0.0306043	0.715271	1	gi|672119066|ref|XP_008782759.1|	PREDICTED: NAC transcription factor 25-like [Phoenix dactylifera]	osa:4332717	Os03g0327800	--	--	sp|A2YMR0|NAC10_ORYSI	NAC transcription factor ONAC010 OS=Oryza sativa subsp. indica GN=ONAC010 PE=3 SV=1	GO:0006355,nac transcription factor 29-like; GO:0003677,nac transcription factor 29-like; GO:0003700,nac transcription factor 29-like; GO:0010260,nac transcription factor 29-like; GO:0006865,nac transcription factor 29-like
Zoff039643	15.26	3	10.16	3.5	3	1	2.33	2.98	7.79	27.3	22.73	23.08	0.75	0.15	0.5	0.17	0.17	0.05	0.12	0.15	0.39	1.38	1.18	1.14	0.466667	0.13	0.22	1.23333	-1.84388	0.618567	2.48699	0.234424	3.24598	0.00738064	-1.08489	1	gi|672119066|ref|XP_008782759.1|	PREDICTED: NAC transcription factor 25-like [Phoenix dactylifera]	osa:4332717	Os03g0327800	At1g64100	[R] KOG4197 FOG: PPR repeat	sp|A2YMR0|NAC10_ORYSI	NAC transcription factor ONAC010 OS=Oryza sativa subsp. indica GN=ONAC010 PE=3 SV=1	GO:0044699,nac transcription factor 29-like; GO:0006355,nac transcription factor 29-like; GO:0003677,nac transcription factor 29-like
Zoff039925	5	13	4	21	6	37.52	2	2	8	0	0	0	0.25	0.65	0.2	1.03	0.34	1.86	0.1	0.1	0.4	0	0	0	0.366667	1.07667	0.2	0.001	1.55403	0.510969	-7.64386	0.567391	-10.0724	0.000411319	-0.874469	1	gi|671182752|ref|XP_008731837.1|	hypothetical protein G647_09312 [Cladophialophora carrionii CBS 160.54]	act:ACLA_031730	F-box domain protein	--	--	--	--	--
Zoff040013	9.61	2	20	80.49	50.01	65.32	0	105.27	28	165.46	100.47	93.34	0.47	0.1	0.99	3.96	2.87	3.24	0	5.21	1.41	8.39	5.2	4.61	0.52	3.35667	2.20667	6.06667	2.69045	0.0031566	1.45904	1	0.853875	0.877607	2.08529	1	gi|695008588|ref|XP_009390894.1|	PREDICTED: WAT1-related protein At1g21890-like [Musa acuminata subsp. malaccensis]	osa:4348283	Os10g0210500	--	--	sp|F4HZQ7|WTR5_ARATH	WAT1-related protein At1g21890 OS=Arabidopsis thaliana GN=At1g21890 PE=2 SV=1	GO:0016020,wat1-related protein at1g21890-like
Zoff040288	0.33	1	0	6.68	1	83.09	0.33	0.33	0	0	0.33	0	0.02	0.05	0	0.33	0.06	4.12	0.02	0.02	0	0	0.02	0	0.0233333	1.50333	0.0133333	0.00666667	6.00963	0.00696365	-1	1	-7.81698	0.00445817	-0.807355	1	gi|628341767|ref|XP_007747730.1|	F-type H+-transporting ATPase subunit H [Cladophialophora psammophila CBS 110553]	cpw:CPC735_006470	hypothetical protein; K02141 F-type H+-transporting ATPase subunit h [EC:3.6.3.14]	--	--	sp|Q12349|ATP14_YEAST	ATP synthase subunit H, mitochondrial OS=Saccharomyces cerevisiae (strain ATCC 204508 / S288c) GN=ATP14 PE=1 SV=1	--
Zoff040599	0	0	0	17	9	3	0	0	0	0	0	0	0	0	0	0.84	0.52	0.15	0	0	0	0	0	0	0.001	0.503333	0.001	0.001	8.97537	0.00723039	0	1	-8.97537	0.0164828	0	1	gi|470475710|ref|XP_004342182.1|	kelch repeat protein [Acanthamoeba castellanii str. Neff]	ddi:DDB_G0268696	hypothetical protein	At1g18610	[R] KOG0379 Kelch repeat-containing proteins	sp|Q58CV6|KLDC3_BOVIN	Kelch domain-containing protein 3 OS=Bos taurus GN=KLHDC3 PE=2 SV=2	--
Zoff040604	0	0	1	0	0	0	0	0	0	15	0	110	0	0	0.05	0	0	0	0	0	0	0.76	0	5.44	0.0166667	0.001	0.001	2.06667	-4.05889	1	11.0131	0.0444832	11.0131	0.00481844	-4.05889	1	gi|675168717|ref|XP_008893243.1|	hypothetical protein PPTG_01622 [Phytophthora parasitica INRA-310]	pif:PITG_01300	DNA topoisomerase 2 DNA gyrase B; K03164 DNA topoisomerase II [EC:5.99.1.3]	At3g52560	[O] KOG0896 Ubiquitin-conjugating enzyme E2	sp|Q9SVD7|UEV1D_ARATH	Ubiquitin-conjugating enzyme E2 variant 1D OS=Arabidopsis thaliana GN=UEV1D PE=1 SV=1	GO:0006200,ubiquitin conjugating enzyme; GO:0016881,ubiquitin conjugating enzyme; GO:0003677,ubiquitin conjugating enzyme; GO:0005524,ubiquitin conjugating enzyme; GO:0003918,ubiquitin conjugating enzyme; GO:0006265,ubiquitin conjugating enzyme
Zoff040827	0	0	0	14	3	3.77	0	0	1	4	0	2	0	0	0	0.69	0.17	0.19	0	0	0.05	0.2	0	0.1	0.001	0.35	0.0166667	0.1	8.45121	0.0377012	2.58496	1	-1.80735	0.915353	4.05889	1	gi|576991512|gb|EUC64214.1|	G protein coupled glucose receptor regulating Gpa2 protein [Rhizoctonia solani AG-3 Rhs1AP]	scm:SCHCODRAFT_103565	hypothetical protein	--	--	--	--	--
Zoff041140	0	0	0	2	3	41	1	0	12	0	1	0	0	0	0	0.1	0.17	2.03	0.05	0	0.6	0	0.05	0	0.001	0.766667	0.216667	0.0166667	9.58246	0.011343	-3.70044	1	-5.52356	0.0506201	7.75933	1	gi|628322138|ref|XP_007737011.1|	hypothetical protein A1O3_08724 [Capronia epimyces CBS 606.96]	pcs:Pc21g13770	Pc21g13770; K01011 thiosulfate/3-mercaptopyruvate sulfurtransferase [EC:2.8.1.1 2.8.1.2]	YOR251c	[V] KOG1529 Mercaptopyruvate sulfurtransferase/thiosulfate sulfurtransferase	sp|Q08686|THTR_YEAST	Thiosulfate sulfurtransferase TUM1 OS=Saccharomyces cerevisiae (strain ATCC 204508 / S288c) GN=TUM1 PE=1 SV=1	GO:0008152,thiosulfate sulfurtransferase; GO:0016740,thiosulfate sulfurtransferase
Zoff041238	0	0	0	0	0	0	0	0	0	8	0	52	0	0	0	0	0	0	0	0	0	0.41	0	2.57	0.001	0.001	0.001	0.993333	0	1	9.95613	0.100486	9.95613	0.0203885	0	1	gi|675181625|ref|XP_008899697.1|	hypothetical protein PPTG_07283 [Phytophthora parasitica INRA-310]	pif:PITG_15652	H/ACA ribonucleoprotein complex subunit, putative; K11128 H/ACA ribonucleoprotein complex subunit 1	YHR089c	[J] KOG3262 H/ACA small nucleolar RNP component GAR1	sp|Q2HH48|GAR1_CHAGB	H/ACA ribonucleoprotein complex subunit 1 OS=Chaetomium globosum (strain ATCC 6205 / CBS 148.51 / DSM 1962 / NBRC 6347 / NRRL 1970) GN=GAR1 PE=3 SV=1	GO:0019013,h aca ribonucleoprotein complex subunit 1; GO:0003723,h aca ribonucleoprotein complex subunit 1; GO:0031429,h aca ribonucleoprotein complex subunit 1; GO:0042254,h aca ribonucleoprotein complex subunit 1; GO:0034660,h aca ribonucleoprotein complex subunit 1; GO:0001522,h aca ribonucleoprotein complex subunit 1
Zoff041676	0	0	0	0	0	0	0	0	0	9.89	0	25.34	0	0	0	0	0	0	0	0	0	0.5	0	1.25	0.001	0.001	0.001	0.583333	0	1	9.18818	0.19066	9.18818	0.0495477	0	1	gi|566009561|gb|ETI32472.1|	hypothetical protein F443_20736 [Phytophthora parasitica P1569]	pif:PITG_10240	pirin, putative; K06911	--	--	sp|O00625|PIR_HUMAN	Pirin OS=Homo sapiens GN=PIR PE=1 SV=1	--
Zoff041678	0	0	0	0	0	0	1	0	0	14	0	104	0	0	0	0	0	0	0.05	0	0	0.71	0	5.14	0.001	0.001	0.0166667	1.95	0	1	6.87036	0.0799509	10.9293	0.00536843	4.05889	1	gi|145932367|ref|YP_001165416.1|	ribosomal protein L16 [Phytophthora sojae]	mes:Meso_1671	rplP; 50S ribosomal protein L16; K02878 large subunit ribosomal protein L16	AtCh059	[J] KOG3422 Mitochondrial ribosomal protein L16	sp|Q11HQ9|RL16_CHESB	50S ribosomal protein L16 OS=Chelativorans sp. (strain BNC1) GN=rplP PE=3 SV=1	GO:0005840,ribosomal protein l16; GO:0003735,ribosomal protein l16; GO:0006412,ribosomal protein l16; GO:0019843,ribosomal protein l16; GO:0009536,ribosomal protein l16; GO:0005739,ribosomal protein l16
Zoff041855	2	0	5	20	4	31	4	0	19	0	0	0	0.1	0	0.25	0.98	0.23	1.54	0.2	0	0.96	0	0	0	0.116667	0.916667	0.386667	0.001	2.974	0.071628	-8.59495	0.39606	-9.84025	0.0013484	1.7287	1	gi|656907706|gb|KEF53443.1|	hypothetical protein A1O9_10418 [Exophiala aquamarina CBS 119918]	ure:UREG_04944	hypothetical protein; K12615 enhancer of mRNA-decapping protein 3	SPBC18E5.11c	[S] KOG2585 Uncharacterized conserved protein	sp|O94752|EDC3_SCHPO	Enhancer of mRNA-decapping protein 3 OS=Schizosaccharomyces pombe (strain 972 / ATCC 24843) GN=edc3 PE=1 SV=1	--
Zoff042179	0	0	0	0	0	0	0	0	0	3	0	48	0	0	0	0	0	0	0	0	0	0.15	0	2.37	0.001	0.001	0.001	0.84	0	1	9.71425	0.164261	9.71425	0.0463929	0	1	gi|675212989|ref|XP_008915379.1|	hypothetical protein PPTG_18572 [Phytophthora parasitica INRA-310]	pif:PITG_12905	transmembrane protein, putative; K00236 succinate dehydrogenase (ubiquinone) cytochrome b subunit [EC:1.3.5.1]	7299395	[G] KOG0449 Succinate dehydrogenase, cytochrome b subunit	sp|Q8T2T5|C560_DICDI	Succinate dehydrogenase cytochrome b560 subunit, mitochondrial OS=Dictyostelium discoideum GN=sdhC PE=3 SV=1	GO:0016627,succinate dehydrogenase cytochrome b subunit; GO:0044425,succinate dehydrogenase cytochrome b subunit; GO:0055114,succinate dehydrogenase cytochrome b subunit
Zoff042262	8	19	14	14	25	58	15	13	23	3	4	3	0.39	0.95	0.69	0.69	1.44	2.88	0.76	0.64	1.16	0.15	0.21	0.15	0.676667	1.67	0.853333	0.17	1.30333	0.530198	-2.32757	0.39488	-3.29624	0.00723249	0.334664	1	gi|695046248|ref|XP_009410946.1|	PREDICTED: probable WRKY transcription factor 71 [Musa acuminata subsp. malaccensis]	--	--	--	--	--	--	--
Zoff042601	4	1	0	5	1	27	4	0	3	0	0	0	0.2	0.05	0	0.25	0.06	1.34	0.2	0	0.15	0	0	0	0.0833333	0.55	0.116667	0.001	2.72247	0.489686	-6.86625	1	-9.10329	0.0372305	0.485427	1	gi|656908314|gb|KEF54049.1|	hypothetical protein A1O9_09844 [Exophiala aquamarina CBS 119918]	--	--	--	--	--	--	--
Zoff042812	0	0	2	2	1	3	1	0	3	35	5	96	0	0	0.1	0.1	0.06	0.15	0.05	0	0.15	1.78	0.26	4.75	0.0333333	0.103333	0.0666667	2.26333	1.63227	1	5.08534	0.0428969	4.45307	0.004707	1	1	gi|694994724|ref|XP_009395153.1|	PREDICTED: uncharacterized protein LOC103980421 [Musa acuminata subsp. malaccensis]	sbi:SORBI_01g047550	hypothetical protein	--	--	--	--	--
Zoff043562	496	578	469	191	195	175	487	435	407	509	260	496	24.41	28.96	23.15	9.4	11.2	8.68	24.63	21.54	20.5	25.82	13.45	24.52	25.5067	9.76	22.2233	21.2633	-1.38592	0.0151392	-0.0637074	1	1.12341	0.43117	-0.198799	1	gi|695033485|ref|XP_009404229.1|	PREDICTED: 60S ribosomal protein L32-1-like [Musa acuminata subsp. malaccensis]	rcu:RCOM_0379000	60S ribosomal protein L32, putative; K02912 large subunit ribosomal protein L32e	At4g18100	[J] KOG0878 60S ribosomal protein L32	sp|P49211|RL321_ARATH	60S ribosomal protein L32-1 OS=Arabidopsis thaliana GN=RPL32A PE=2 SV=2	GO:0005840,60s ribosomal protein l32-1-like; GO:0003735,60s ribosomal protein l32-1-like; GO:0006412,60s ribosomal protein l32-1-like; GO:0009536,60s ribosomal protein l32-1-like; GO:0005739,60s ribosomal protein l32-1-like
Zoff044162	9.23	2	5	8.57	12	11	0	5	2	0	2	0	0.45	0.1	0.25	0.42	0.69	0.55	0	0.25	0.1	0	0.1	0	0.266667	0.553333	0.116667	0.0333333	1.05311	1	-1.80735	1	-4.05311	0.0463929	-1.19265	1	gi|695006822|ref|XP_009389931.1|	PREDICTED: heat shock 70 kDa protein 14-like [Musa acuminata subsp. malaccensis]	vvi:100260001	hypothetical protein LOC100260001; K09489 heat shock 70kDa protein 4	At1g79920	[O] KOG0103 Molecular chaperones HSP105/HSP110/SSE1, HSP70 superfamily	sp|Q9S7C0|HSP7O_ARATH	Heat shock 70 kDa protein 14 OS=Arabidopsis thaliana GN=HSP70-14 PE=2 SV=1	GO:0005524,heat shock 70 kda protein 15-like
Zoff044361	0	2	0	7	8	3.85	3	1	29.46	0	0	0	0	0.1	0	0.34	0.46	0.19	0.15	0.05	1.48	0	0	0	0.0333333	0.33	0.56	0.001	3.30743	0.227278	-9.12928	0.183527	-8.36632	0.0436638	4.07039	0.723204	gi|695043724|ref|XP_009409567.1|	PREDICTED: pectinesterase/pectinesterase inhibitor PPE8B-like [Musa acuminata subsp. malaccensis]	rcu:RCOM_0708460	Pectinesterase PPE8B precursor, putative (EC:3.1.1.11); K01051 pectinesterase [EC:3.1.1.11]	--	--	sp|Q43062|PME_PRUPE	Pectinesterase/pectinesterase inhibitor PPE8B OS=Prunus persica PE=2 SV=1	GO:0042545,pectinesterase pectinesterase inhibitor ppe8b-like; GO:0005618,pectinesterase pectinesterase inhibitor ppe8b-like; GO:0030599,pectinesterase pectinesterase inhibitor ppe8b-like; GO:0045330,pectinesterase pectinesterase inhibitor ppe8b-like; GO:0004857,pectinesterase pectinesterase inhibitor ppe8b-like; GO:0043086,pectinesterase pectinesterase inhibitor ppe8b-like; GO:0045490,pectineste…
Zoff044943	31	129	21	40	30	25	31	8	21	1	1	2	1.53	6.46	1.04	1.97	1.72	1.24	1.57	0.4	1.06	0.05	0.05	0.1	3.01	1.64333	1.01	0.0666667	-0.873138	1	-3.92125	0.0799509	-4.62352	9.9e-05	-1.57541	1	gi|695010416|ref|XP_009391881.1|	PREDICTED: linoleate 13S-lipoxygenase 2-1, chloroplastic-like [Musa acuminata subsp. malaccensis]	vvi:100257867	hypothetical protein LOC100257867; K00454 lipoxygenase [EC:1.13.11.12]	--	--	sp|P93184|LOX21_HORVU	Lipoxygenase 2.1, chloroplastic OS=Hordeum vulgare GN=LOX2.1 PE=1 SV=1	GO:0031408,linoleate 13s-lipoxygenase 2- chloroplastic-like; GO:0016165,linoleate 13s-lipoxygenase 2- chloroplastic-like; GO:0005506,linoleate 13s-lipoxygenase 2- chloroplastic-like; GO:0055114,linoleate 13s-lipoxygenase 2- chloroplastic-like
Zoff045164	3	10	1	4	7	7	10	2	0	0	0	0	0.15	0.5	0.05	0.2	0.4	0.35	0.51	0.1	0	0	0	0	0.233333	0.316667	0.203333	0.001	0.440573	1	-7.6677	0.883191	-8.30682	0.0485591	-0.198546	1	gi|695079174|ref|XP_009387000.1|	PREDICTED: uncharacterized protein LOC103974010 [Musa acuminata subsp. malaccensis]	vvi:100243292	hypothetical protein LOC100243292	--	--	--	--	--
Zoff045299	0	0	0	0	0	0	9	1	0	20	5	14	0	0	0	0	0	0	0.46	0.05	0	1.01	0.26	0.69	0.001	0.001	0.17	0.653333	0	1	1.94228	1	9.35168	0.00424508	7.40939	1	gi|672111354|ref|XP_008800296.1|	PREDICTED: chitinase 6-like [Phoenix dactylifera]	vvi:100244031	hypothetical protein LOC100244031	At3g54420	[R] KOG4742 Predicted chitinase	sp|Q6K8R2|CHI6_ORYSJ	Chitinase 6 OS=Oryza sativa subsp. japonica GN=Cht6 PE=2 SV=1	GO:0009056,chitinase 5-like; GO:0043170,chitinase 5-like
Zoff045421	0	0	0	0	0	0	0	1	0	9	5	5	0	0	0	0	0	0	0	0.05	0	0.46	0.26	0.25	0.001	0.001	0.0166667	0.323333	0	1	4.27798	0.404984	8.33688	0.0412689	4.05889	1	gi|471878376|emb|CCO35224.1|	putative serine/threonine-protein kinase drkC [Rhizoctonia solani AG-1 IB]	scm:SCHCODRAFT_232455	hypothetical protein	At4g18950	[T] KOG0192 Tyrosine kinase specific for activated (GTP-bound) p21cdc42Hs	sp|P06239|LCK_HUMAN	Tyrosine-protein kinase Lck OS=Homo sapiens GN=LCK PE=1 SV=6	GO:0004672,serine threonine-kinase tnni3k; GO:0006468,serine threonine-kinase tnni3k; GO:0005524,serine threonine-kinase tnni3k
Zoff045470	27	21	85	12	10	5	6	2	4	0	0	1	1.33	1.05	4.2	0.59	0.57	0.25	0.3	0.1	0.2	0	0	0.05	2.19333	0.47	0.2	0.0166667	-2.22239	0.0502582	-3.58496	0.919882	-4.81762	0.0412751	-3.45505	0.0943487	gi|695032761|ref|XP_009403936.1|	PREDICTED: protein MOTHER of FT and TF 1-like [Musa acuminata subsp. malaccensis]	vvi:100245616	hypothetical protein LOC100245616	At1g18100	[R] KOG3346 Phosphatidylethanolamine binding protein	sp|Q9XFK7|MFT_ARATH	Protein MOTHER of FT and TF 1 OS=Arabidopsis thaliana GN=MFT PE=1 SV=1	GO:0005737,protein mother of ft and tf 1; GO:0010030,protein mother of ft and tf 1; GO:0046685,protein mother of ft and tf 1; GO:0005634,protein mother of ft and tf 1; GO:0009737,protein mother of ft and tf 1
Zoff046072	0	0	1	268	46	104	2	1	16	29	38	50	0	0	0.05	13.19	2.64	5.16	0.1	0.05	0.81	1.47	1.97	2.47	0.0166667	6.99667	0.32	1.97	8.71356	2.64e-11	2.62205	0.333645	-1.82847	0.166804	4.26303	0.959666	gi|576992827|gb|EUC65502.1|	RNA recognition motif 1 in RNA-binding protein [Rhizoctonia solani AG-3 Rhs1AP]	ppl:POSPLDRAFT_87425	hypothetical protein; K12881 THO complex subunit 4	SPBC1D7.04c	[A] KOG0533 RRM motif-containing protein	sp|Q09330|MLO3_SCHPO	mRNA export protein mlo3 OS=Schizosaccharomyces pombe (strain 972 / ATCC 24843) GN=mlo3 PE=1 SV=1	--
Zoff046287	0	5	1	1	0	0	2	0	2	16	14	4	0	0.25	0.05	0.05	0	0	0.1	0	0.1	0.81	0.72	0.2	0.1	0.0166667	0.0666667	0.576667	-2.58496	1	3.1127	0.461857	5.1127	0.0235528	-0.584963	1	gi|628340355|ref|XP_007747283.1|	hypothetical protein A1O5_08511 [Cladophialophora psammophila CBS 110553]	--	--	--	--	--	--	--
Zoff047942	0	0	0	0	0	0	0	0	0	2	0	57	0	0	0	0	0	0	0	0	0	0.1	0	2.82	0.001	0.001	0.001	0.973333	0	1	9.92679	0.153521	9.92679	0.0422077	0	1	gi|566011698|gb|ETI34609.1|	hypothetical protein F443_18901 [Phytophthora parasitica P1569]	pif:PITG_02285	hypothetical protein	--	--	--	--	--
Zoff048042	50.44	98.19	58.41	172.25	196.1	193.77	91.44	133.3	104.5	54.83	55.52	69.61	2.48	4.92	2.88	8.48	11.26	9.61	4.62	6.6	5.26	2.78	2.87	3.44	3.42667	9.78333	5.49333	3.03	1.51352	0.0321781	-0.858364	1	-1.69101	0.05372	0.680876	1	gi|697169925|ref|XP_009593870.1|	PREDICTED: protein SPIRAL1-like 1 [Nicotiana tomentosiformis]	rcu:RCOM_0048980	SP1L, putative	--	--	sp|B3H4F1|SP1L1_ARATH	Protein SPIRAL1-like 1 OS=Arabidopsis thaliana GN=SP1L1 PE=2 SV=1	GO:0005886,protein spiral1-like 1
Zoff048889	0	1	1	2	1	0	1	0	0	6	0	130	0	0.05	0.05	0.1	0.06	0	0.05	0	0	0.3	0	6.43	0.0333333	0.0533333	0.0166667	2.24333	0.678072	1	7.07253	0.0965268	5.39446	0.0482667	-1	1	gi|695426151|ref|XP_009529350.1|	hypothetical protein PHYSODRAFT_333832 [Phytophthora sojae]	pif:PITG_00656	hypothetical protein	CE05883	[U] KOG1691 emp24/gp25L/p24 family of membrane trafficking proteins	sp|Q6IDL4|P24D3_ARATH	Transmembrane emp24 domain-containing protein p24delta3 OS=Arabidopsis thaliana GN=At1g09580 PE=1 SV=1	GO:0016021,integral membrane tmp21-; GO:0006810,integral membrane tmp21-
Zoff048895	0	0	0	0	0	0	0	0	0	2	0	126	0	0	0	0	0	0	0	0	0	0.1	0	6.23	0.001	0.001	0.001	2.11	0	1	11.043	0.0788005	11.043	0.0156269	0	1	gi|695397247|ref|XP_009521694.1|	hypothetical protein PHYSODRAFT_258713 [Phytophthora sojae]	pif:PITG_21151	Annexin (Annexin) Family	Hs4502105	[U] KOG0819 Annexin	sp|P50994|ANXA4_CANFA	Annexin A4 OS=Canis familiaris GN=ANXA4 PE=1 SV=2	GO:0005509,annexin family; GO:0005544,annexin family
Zoff048945	0	0	0	6	3	9	0	0	1	0	1	0	0	0	0	0.3	0.17	0.45	0	0	0.05	0	0.05	0	0.001	0.306667	0.0166667	0.0166667	8.26053	0.0382987	0	1	-4.20163	0.161592	4.05889	1	gi|281209082|gb|EFA83257.1|	phosphatidylinositol transfer protein [Polysphondylium pallidum PN500]	ddi:DDB_G0280449	pitC; phosphatidylinositol transfer protein	Hs4758926	[IT] KOG3668 Phosphatidylinositol transfer protein	sp|Q54VC7|PITP3_DICDI	Phosphatidylinositol transfer protein 3 OS=Dictyostelium discoideum GN=pitC PE=3 SV=1	GO:0008526,phosphatidylinositol transfer protein; GO:0043231,phosphatidylinositol transfer protein; GO:0046872,phosphatidylinositol transfer protein; GO:0007420,phosphatidylinositol transfer protein; GO:0007602,phosphatidylinositol transfer protein; GO:0015914,phosphatidylinositol transfer protein; GO:0044444,phosphatidylinositol transfer proteinGO:0012505,phosphatidylinositol transfer proteinGO:…
Zoff048975	11	14	15	0	1	3	3	0	4	0	0	0	0.54	0.7	0.74	0	0.06	0.15	0.15	0	0.2	0	0	0	0.66	0.07	0.116667	0.001	-3.23704	0.018599	-6.86625	1	-6.12928	1	-2.50007	0.6293	gi|694999051|ref|XP_009407401.1|	PREDICTED: uncharacterized protein LOC103990092 [Musa acuminata subsp. malaccensis]	--	--	--	--	--	--	--
Zoff049002	0	1	0	3	0	46	0	0	4	0	0	0	0	0.05	0	0.15	0	2.28	0	0	0.2	0	0	0	0.0166667	0.81	0.0666667	0.001	5.60288	0.0824984	-6.05889	1	-9.66178	0.0474555	2	1	gi|628253375|ref|XP_007725526.1|	hypothetical protein A1O1_06457 [Capronia coronata CBS 617.96]	--	--	--	--	--	--	--
Zoff049057	35	45	15	4	3	1	2	0	0	0	2	0	1.72	2.25	0.74	0.2	0.17	0.05	0.1	0	0	0	0.1	0	1.57	0.14	0.0333333	0.0333333	-3.48727	0.000389895	0	1	-2.07039	1	-5.55766	0.00468194	gi|586677323|ref|XP_006838895.1|	hypothetical protein AMTR_s00002p00268740 [Amborella trichopoda]	osa:4339684	Os05g0574600	--	--	sp|Q5XEP9|KCS17_ARATH	3-ketoacyl-CoA synthase 17 OS=Arabidopsis thaliana GN=KCS17 PE=2 SV=2	GO:0016020,3-ketoacyl- synthase 19-like; GO:0006633,3-ketoacyl- synthase 19-like; GO:0016747,3-ketoacyl- synthase 19-like
Zoff049181	2	1	0	98	5	5	0	1	0	1	0	0	0.1	0.05	0	4.82	0.29	0.25	0	0.05	0	0.05	0	0	0.05	1.78667	0.0166667	0.0166667	5.1592	0.00837037	0	1	-6.74416	0.00428016	-1.58496	1	gi|505014169|ref|WP_015201271.1|	hypothetical protein [Crinalium epipsammum]	hje:HacjB3_03395	endoglucanase family protein	--	--	sp|P16218|GUNH_CLOTH	Endoglucanase H OS=Clostridium thermocellum (strain ATCC 27405 / DSM 1237 / NBRC 103400 / NCIMB 10682 / NRRL B-4536 / VPI 7372) GN=celH PE=1 SV=1	--
Zoff049193	0	0	0	38	2	12	0	1	1	5	4	2	0	0	0	1.87	0.11	0.6	0	0.05	0.05	0.25	0.21	0.1	0.001	0.86	0.0333333	0.186667	9.74819	0.00193968	2.48543	1	-2.20387	0.426786	5.05889	1	gi|639557764|gb|KDN35822.1|	hypothetical protein RSAG8_11256, partial [Rhizoctonia solani AG-8 WAC10335]	scm:SCHCODRAFT_82666	hypothetical protein; K03522 electron transfer flavoprotein alpha subunit	Hs4503607	[C] KOG3954 Electron transfer flavoprotein, alpha subunit	sp|P0CN60|ETFA_CRYNJ	Probable electron transfer flavoprotein subunit alpha, mitochondrial OS=Cryptococcus neoformans var. neoformans serotype D (strain JEC21 / ATCC MYA-565) GN=ETF1 PE=3 SV=1	GO:0050660,electron transfer flavo protein alpha subunit; GO:0009055,electron transfer flavo protein alpha subunit
Zoff049364	0	0	0	16	1	6	0	0	0	1	1	2	0	0	0	0.79	0.06	0.3	0	0	0	0.05	0.05	0.1	0.001	0.383333	0.001	0.0666667	8.58246	0.0443616	6.05889	1	-2.52356	0.56486	0	1	gi|471915888|emb|CCO26341.1|	Sterol regulatory element-binding protein cleavage-activating protein Short=SCAP [Rhizoctonia solani AG-1 IB]	cci:CC1G_03868	hypothetical protein	--	--	--	--	--
Zoff049366	2	2	2	9	4	40	0	1	3	0	1	0	0.1	0.1	0.1	0.44	0.23	1.98	0	0.05	0.15	0	0.05	0	0.1	0.883333	0.0666667	0.0166667	3.14296	0.0579531	-2	1	-5.72792	0.0105016	-0.584963	1	gi|628320810|ref|XP_007736770.1|	hypothetical protein A1O3_08482 [Capronia epimyces CBS 606.96]	ang:ANI_1_1084064	An07g08740; hypothetical protein	--	--	--	--	--
Zoff049374	4	5	3	18	5	40	1	0	15	3	2	1	0.2	0.25	0.15	0.89	0.29	1.98	0.05	0	0.76	0.15	0.1	0.05	0.2	1.05333	0.27	0.1	2.39689	0.100522	-1.43296	1	-3.39689	0.0358067	0.432959	1	gi|656917933|gb|KEF63511.1|	hypothetical protein A1O9_01489 [Exophiala aquamarina CBS 119918]	ure:UREG_01119	hypothetical protein	--	--	sp|Q5UNV9|YL696_MIMIV	Uncharacterized protein L696 OS=Acanthamoeba polyphaga mimivirus GN=MIMI_L696 PE=4 SV=1	GO:0003824,hypothetical protein A1O1_00276 [Capronia coronata CBS 617.96]; GO:0008152,hypothetical protein A1O1_00276 [Capronia coronata CBS 617.96]
Zoff049390	0	0	0	6	5	31	1	0	2	0	0	1	0	0	0	0.3	0.29	1.54	0.05	0	0.1	0	0	0.05	0.001	0.71	0.05	0.0166667	9.47168	0.00241863	-1.58496	1	-5.41278	0.0209326	5.64386	1	gi|656914978|gb|KEF60557.1|	hypothetical protein A1O9_02118 [Exophiala aquamarina CBS 119918]	ssl:SS1G_02715	hypothetical protein	7292310	[R] KOG2816 Predicted transporter ADD1 (major facilitator superfamily)	sp|P02981|TCR3_ECOLX	Tetracycline resistance protein, class C OS=Escherichia coli GN=tetA PE=1 SV=1	GO:0016021,tetracycline-efflux partial; GO:0055085,tetracycline-efflux partial; GO:0005215,tetracycline-efflux partial
Zoff049397	13	9	7	45	23	378	10	6	78	4	2	0	0.64	0.45	0.35	2.21	1.32	18.76	0.51	0.3	3.93	0.2	0.1	0	0.48	7.43	1.58	0.1	3.95226	0.00242469	-3.98185	0.160698	-6.21529	0.000254216	1.71882	1	gi|656907461|gb|KEF53199.1|	hypothetical protein A1O9_10647 [Exophiala aquamarina CBS 119918]	afv:AFLA_083060	heme/steroid binding domain protein, putative	CE18831	[R] KOG1108 Predicted heme/steroid binding protein	sp|Q60YT6|NEUFC_CAEBR	Neuferricin homolog OS=Caenorhabditis briggsae GN=tag-131 PE=3 SV=1	GO:0020037,heme steroid binding domain protein
Zoff049421	17	6	19	7	6	7	22	7	6.03	91.27	90.27	91	0.84	0.3	0.94	0.34	0.34	0.35	1.11	0.35	0.3	4.63	4.67	4.5	0.693333	0.343333	0.586667	4.6	-1.01394	0.954977	2.97102	0.0590891	3.74395	1.24e-05	-0.241008	1	gi|50404475|gb|AAT76902.1|	asparagine synthase-related protein [Elaeis guineensis]	osa:4337421	Os04g0679400	--	--	--	--	--
Zoff049423	25	5	22	9.01	11	3	23	4	6.03	97.33	88.29	117	1.23	0.25	1.09	0.44	0.63	0.15	1.16	0.2	0.3	4.94	4.57	5.78	0.856667	0.406667	0.553333	5.09667	-1.07489	1	3.20333	0.0542866	3.64764	0.000111024	-0.630585	1	gi|50404475|gb|AAT76902.1|	asparagine synthase-related protein [Elaeis guineensis]	osa:4337421	Os04g0679400	--	--	--	--	--
Zoff049572	0	0	0	2.33	5	40.76	0	0	5	0	1	0	0	0	0	0.11	0.29	2.02	0	0	0.25	0	0.05	0	0.001	0.806667	0.0833333	0.0166667	9.65583	0.0057391	-2.32193	1	-5.59694	0.0321568	6.38082	1	gi|656918191|gb|KEF63769.1|	hypothetical protein A1O9_01747 [Exophiala aquamarina CBS 119918]	cim:CIMG_04698	hypothetical protein; K11380 NuA3 HAT complex component NTO1	7304241	[R] KOG0955 PHD finger protein BR140/LIN-49	sp|P55201|BRPF1_HUMAN	Peregrin OS=Homo sapiens GN=BRPF1 PE=1 SV=2	GO:0008270,3 hat complex component nto1
Zoff049643	60	48	64	82	61	60	38	21	18	12	19	16	2.95	2.41	3.16	4.04	3.5	2.98	1.92	1.04	0.91	0.61	0.98	0.79	2.84	3.50667	1.29	0.793333	0.304209	1	-0.701372	1	-2.1441	0.019262	-1.13852	1	gi|695022232|ref|XP_009398237.1|	PREDICTED: scarecrow-like protein 23 [Musa acuminata subsp. malaccensis]	vvi:100247274	hypothetical protein LOC100247274	--	--	sp|Q9AVK4|SCR_PEA	Protein SCARECROW OS=Pisum sativum GN=SCR PE=2 SV=1	GO:0006355,scarecrow-like protein 23; GO:0003700,scarecrow-like protein 23; GO:0005634,scarecrow-like protein 23
Zoff049674	0	0	0	4	4	41	1	0	6	2	0	0	0	0	0	0.2	0.23	2.03	0.05	0	0.3	0.1	0	0	0.001	0.82	0.116667	0.0333333	9.67948	0.00390022	-1.80735	1	-4.62059	0.058617	6.86625	1	gi|656909814|gb|KEF55492.1|	serine/threonine protein kinase [Exophiala aquamarina CBS 119918]	nfi:NFIA_090930	hexokinase family protein XprF, putative	7301467	[G] KOG1369 Hexokinase	sp|Q4U3Y2|HXK1_ASPFU	Hexokinase-1 OS=Neosartorya fumigata (strain ATCC MYA-4609 / Af293 / CBS 101355 / FGSC A1100) GN=hxkA PE=2 SV=1	GO:0006468,hexokinase family protein; GO:0004674,hexokinase family protein; GO:0005524,hexokinase family protein; GO:0006096,hexokinase family protein
Zoff049724	90	106	210	28	22	28	23	10	36	18	20	7	4.43	5.31	10.37	1.38	1.26	1.39	1.16	0.5	1.81	0.91	1.03	0.35	6.70333	1.34333	1.15667	0.763333	-2.31906	0.000806802	-0.599588	1	-0.815432	1	-2.53491	0.165326	gi|695081576|ref|XP_009388315.1|	PREDICTED: probable L-type lectin-domain containing receptor kinase S.5 [Musa acuminata subsp. malaccensis]	vvi:100251677	hypothetical protein LOC100251677	At5g24010	[T] KOG1187 Serine/threonine protein kinase	sp|Q9LXA5|LRK91_ARATH	L-type lectin-domain containing receptor kinase IX.1 OS=Arabidopsis thaliana GN=LECRK91 PE=2 SV=1	GO:0004715,probable l-type lectin-domain containing receptor kinase; GO:0030246,probable l-type lectin-domain containing receptor kinase; GO:0018108,probable l-type lectin-domain containing receptor kinase; GO:0005524,probable l-type lectin-domain containing receptor kinase; GO:0004674,probable l-type lectin-domain containing receptor kinase
Zoff049831	1	3	0	24	3	12	2	1	1	0	0	0	0.05	0.15	0	1.18	0.17	0.6	0.1	0.05	0.05	0	0	0	0.0666667	0.65	0.0666667	0.001	3.2854	0.0781751	-6.05889	1	-9.3443	0.00699792	0	1	gi|656916148|gb|KEF61727.1|	4-hydroxy-2-oxoglutarate aldolase, mitochondrial [Exophiala aquamarina CBS 119918]	ure:UREG_00255	hypothetical protein	--	--	sp|P0CL20|HOGA1_COCIM	Putative 4-hydroxy-2-oxoglutarate aldolase, mitochondrial OS=Coccidioides immitis (strain RS) GN=CIMG_00151 PE=3 SV=1	GO:0016829,dihydrodipicolinate synthetase; GO:0008152,dihydrodipicolinate synthetase
Zoff049866	0	0	0	14	4	45	0	0	2	0	10	1	0	0	0	0.69	0.23	2.23	0	0	0.1	0	0.52	0.05	0.001	1.05	0.0333333	0.19	10.0362	0.000292882	2.51096	1	-2.46632	0.423961	5.05889	1	gi|291237487|ref|XP_002738655.1|	PREDICTED: cofilin-like [Saccoglossus kowalevskii]	mbr:MONBRDRAFT_8986	hypothetical protein ; K05765 cofilin	SPAC20G4.06c	[Z] KOG1735 Actin depolymerizing factor	sp|P37167|ACTP_ACACA	Actophorin OS=Acanthamoeba castellanii PE=1 SV=2	GO:0005737,actin depolymerizing factor; GO:0003779,actin depolymerizing factor; GO:0030029,actin depolymerizing factor; GO:0005634,actin depolymerizing factor; GO:0015629,actin depolymerizing factor; GO:0044446,actin depolymerizing factor
Zoff049913	2	2	6	7	1	24	1	0	7	0	0	0	0.1	0.1	0.3	0.34	0.06	1.19	0.05	0	0.35	0	0	0	0.166667	0.53	0.133333	0.001	1.66903	0.92218	-7.05889	1	-9.04985	0.0322117	-0.321928	1	gi|656909261|gb|KEF54957.1|	hypothetical protein A1O9_08609 [Exophiala aquamarina CBS 119918]	cpw:CPC735_058120	hypothetical protein; K12819 pre-mRNA-processing factor SLU7	Hs20127501	[A] KOG2560 RNA splicing factor - Slu7p	sp|Q5B3U2|SLU7_EMENI	Pre-mRNA-splicing factor slu7 OS=Emericella nidulans (strain FGSC A4 / ATCC 38163 / CBS 112.46 / NRRL 194 / M139) GN=slu7 PE=3 SV=1	GO:0046872,pre-mrna-splicing factor slu7; GO:0005681,pre-mrna-splicing factor slu7; GO:0000375,pre-mrna-splicing factor slu7; GO:0000386,pre-mrna-splicing factor slu7
Zoff049974	85	94	68	165	92	191	808	321	635	31	79	40	4.18	4.71	3.36	8.12	5.28	9.48	40.86	15.9	31.98	1.57	4.09	1.98	4.08333	7.62667	29.58	2.54667	0.901305	0.476907	-3.53794	0.011962	-1.58244	0.186339	2.8568	0.0139188	gi|255539076|ref|XP_002510603.1|	Plastocyanin A, chloroplast precursor, putative [Ricinus communis]	rcu:RCOM_1599580	Plastocyanin A, chloroplast precursor, putative; K02638 plastocyanin	--	--	sp|O22646|PLAS_FRIAG	Plastocyanin, chloroplastic OS=Fritillaria agrestis GN=PETE PE=2 SV=1	GO:0055114,plastocyanin; GO:0044763,plastocyanin; GO:0046872,plastocyanin; GO:0009507,plastocyanin; GO:0044436,plastocyanin; GO:0044237,plastocyanin; GO:0016020,plastocyanin
Zoff050306	17	31	60	16	45	83	24	14	64	3	0	10	0.84	1.55	2.96	0.79	2.58	4.12	1.21	0.69	3.22	0.15	0	0.49	1.78333	2.49667	1.70667	0.213333	0.485427	1	-3	0.29323	-3.54882	0.019615	-0.0633951	1	gi|695058743|ref|XP_009417696.1|	PREDICTED: putative lipoxygenase 5 [Musa acuminata subsp. malaccensis]	ath:AT1G72520	lipoxygenase, putative (EC:1.13.11.12); K00454 lipoxygenase [EC:1.13.11.12]	--	--	sp|Q7XV13|LOX5_ORYSJ	Putative lipoxygenase 5 OS=Oryza sativa subsp. japonica GN=Os04g0447100 PE=3 SV=2	GO:0031408,lipoxygenase 5; GO:0016165,lipoxygenase 5; GO:0005506,lipoxygenase 5; GO:0009536,lipoxygenase 5; GO:0055114,lipoxygenase 5
Zoff050456	0	0	0	35	2	3	0	0	0	0	0	0	0	0	0	1.72	0.11	0.15	0	0	0	0	0	0	0.001	0.66	0.001	0.001	9.36632	0.0160336	0	1	-9.36632	0.0245528	0	1	gi|471913970|emb|CCO26857.1|	hypothetical protein BN14_00889 [Rhizoctonia solani AG-1 IB]	scm:SCHCODRAFT_255490	hypothetical protein	--	--	--	--	GO:0080090,anaphase-promoting subunit 4; GO:0031323,anaphase-promoting subunit 4; GO:0031145,anaphase-promoting subunit 4; GO:0060255,anaphase-promoting subunit 4
Zoff050542	154.84	172.15	115.03	15.28	39.13	49.41	123.58	116.16	182.94	147.9	46.59	208.1	7.62	8.63	5.68	0.75	2.25	2.45	6.25	5.75	9.21	7.5	2.41	10.29	7.31	1.81667	7.07	6.73333	-2.00858	0.00992987	-0.0703893	1	1.89003	0.166944	-0.0481612	1	gi|330318660|gb|AEC10990.1|	b12d-like protein [Camellia sinensis]	vvi:100263922	hypothetical protein LOC100263922	--	--	--	--	--
Zoff050543	216.16	250.85	156.97	58.72	50.87	63.59	176.42	78.84	182.06	210.1	68.41	283.9	10.64	12.57	7.75	2.89	2.92	3.16	8.92	3.9	9.17	10.66	3.54	14.04	10.32	2.99	7.33	9.41333	-1.78723	0.00249424	0.360892	1	1.65456	0.177618	-0.493558	1	gi|330318660|gb|AEC10990.1|	b12d-like protein [Camellia sinensis]	vvi:100263922	hypothetical protein LOC100263922	--	--	--	--	--
Zoff050595	1	0	0	0	0	0	0	0	0	10	2	9.81	0.05	0	0	0	0	0	0	0	0	0.51	0.1	0.48	0.0166667	0.001	0.001	0.363333	-4.05889	1	8.50515	0.184133	8.50515	0.0454236	-4.05889	1	gi|302896310|ref|XP_003047035.1|	predicted protein [Nectria haematococca mpVI 77-13-4]	pcs:Pc06g00170	Pc06g00170; K00480 salicylate hydroxylase [EC:1.14.13.1]	At5g67030	[CR] KOG2614 Kynurenine 3-monooxygenase and related flavoprotein monooxygenases	sp|A6T923|HPXO_KLEP7	FAD-dependent urate hydroxylase OS=Klebsiella pneumoniae subsp. pneumoniae (strain ATCC 700721 / MGH 78578) GN=hpxO PE=1 SV=1	GO:0004497,salicylate hydroxylase; GO:0055114,salicylate hydroxylase
Zoff050602	0	0	1	7	2	17	0	0	3	0	0	0	0	0	0.05	0.34	0.11	0.84	0	0	0.15	0	0	0	0.0166667	0.43	0.05	0.001	4.6893	0.0589652	-5.64386	1	-8.74819	0.0293734	1.58496	1	gi|656907945|gb|KEF53681.1|	hypothetical protein A1O9_10081 [Exophiala aquamarina CBS 119918]	cpw:CPC735_000750	mitochondrial distribution and morphology (MDM) family protein	--	--	sp|P38880|MDM31_YEAST	Mitochondrial distribution and morphology protein 31 OS=Saccharomyces cerevisiae (strain ATCC 204508 / S288c) GN=MDM31 PE=1 SV=1	GO:0007005,mitochondrion biogenesis protein; GO:0005743,mitochondrion biogenesis protein
Zoff050665	0	0	0	17	5	18	0	0	1	3	1	1	0	0	0	0.84	0.29	0.89	0	0	0.05	0.15	0.05	0.05	0.001	0.673333	0.0166667	0.0833333	9.39518	0.000558786	2.32193	1	-3.01436	0.105073	4.05889	1	gi|660969730|gb|KEP53598.1|	putative DEAD-box ATP-dependent RNA helicase [Rhizoctonia solani 123E]	lbc:LACBIDRAFT_189579	hypothetical protein; K13116 ATP-dependent RNA helicase DDX41 [EC:3.6.4.13]	At5g51280	[A] KOG0341 DEAD-box protein abstrakt	sp|Q9LU46|RH35_ARATH	DEAD-box ATP-dependent RNA helicase 35 OS=Arabidopsis thaliana GN=RH35 PE=2 SV=1	GO:0004386,p-loop containing nucleoside triphosphate hydrolase protein; GO:0003676,p-loop containing nucleoside triphosphate hydrolase protein; GO:0005524,p-loop containing nucleoside triphosphate hydrolase protein; GO:0008152,p-loop containing nucleoside triphosphate hydrolase protein; GO:0008270,p-loop containing nucleoside triphosphate hydrolase protein
Zoff050758	9.06	32.08	22.66	14	11.48	16.39	31.03	24.75	154.34	1	2	0	0.45	1.61	1.12	0.69	0.66	0.81	1.57	1.23	7.77	0.05	0.1	0	1.06	0.72	3.52333	0.05	-0.557995	1	-6.13887	0.00633825	-3.848	0.0193129	1.73288	1	gi|694998305|ref|XP_009403879.1|	PREDICTED: heavy metal-associated isoprenylated plant protein 26-like isoform X1 [Musa acuminata subsp. malaccensis]	zma:100281644	umc2310; LOC100281644	At1g22990	[P] KOG1603 Copper chaperone	sp|Q9SZN7|HIP26_ARATH	Heavy metal-associated isoprenylated plant protein 26 OS=Arabidopsis thaliana GN=HIPP26 PE=1 SV=1	GO:0030001,heavy metal-associated isoprenylated plant protein 26-like; GO:0046872,heavy metal-associated isoprenylated plant protein 26-like
Zoff050765	0	0	0	1	2	32	0	0	2	0	0	0	0	0	0	0.05	0.11	1.59	0	0	0.1	0	0	0	0.001	0.583333	0.0333333	0.001	9.18818	0.0381614	-5.05889	1	-9.18818	0.0532812	5.05889	1	gi|656917840|gb|KEF63418.1|	hypothetical protein A1O9_01396 [Exophiala aquamarina CBS 119918]	cpw:CPC735_039180	ZIP Zinc transporter family protein	YLR130c	[P] KOG1558 Fe2+/Zn2+ regulated transporter	sp|Q12436|ZRT2_YEAST	Zinc-regulated transporter 2 OS=Saccharomyces cerevisiae (strain ATCC 204508 / S288c) GN=ZRT2 PE=1 SV=1	GO:0046873,zip family zinc transporter; GO:0055085,zip family zinc transporter; GO:0016020,zip family zinc transporter; GO:0030001,zip family zinc transporter
Zoff050778	1	1	0	3	1	35	0	1	5	0	0	0	0.05	0.05	0	0.15	0.06	1.74	0	0.05	0.25	0	0	0	0.0333333	0.65	0.1	0.001	4.2854	0.12207	-6.64386	1	-9.3443	0.0363338	1.58496	1	gi|628346303|ref|XP_007749179.1|	hypothetical protein A1O5_10413 [Cladophialophora psammophila CBS 110553]	cpw:CPC735_009510	hypothetical protein	--	--	sp|Q6CBS9|ATG27_YARLI	Autophagy-related protein 27 OS=Yarrowia lipolytica (strain CLIB 122 / E 150) GN=ATG27 PE=3 SV=1	--
Zoff050786	0	4	0	2	2	49	0	0	12	1	0	0	0	0.2	0	0.1	0.11	2.43	0	0	0.6	0.05	0	0	0.0666667	0.88	0.2	0.0166667	3.72247	0.231427	-3.58496	1	-5.72247	0.0474148	1.58496	1	gi|628320068|ref|XP_007762301.1|	proteasome subunit alpha type-2 [Cladophialophora yegresii CBS 114405]	act:ACLA_007560	proteasome component Pre8, putative; K02726 20S proteasome subunit alpha 2 [EC:3.4.25.1]	YML092c	[O] KOG0181 20S proteasome, regulatory subunit alpha type PSMA2/PRE8	sp|Q8X077|PSA2_NEUCR	Probable proteasome subunit alpha type-2 OS=Neurospora crassa (strain ATCC 24698 / 74-OR23-1A / CBS 708.71 / DSM 1257 / FGSC 987) GN=pca-2 PE=3 SV=1	GO:0005737,proteasome subunit alpha type-2; GO:0019773,proteasome subunit alpha type-2; GO:0006511,proteasome subunit alpha type-2; GO:0005634,proteasome subunit alpha type-2; GO:0004298,proteasome subunit alpha type-2
Zoff050818	1	0	0	4	0	71	0	0	10	0	0	0	0.05	0	0	0.2	0	3.52	0	0	0.5	0	0	0	0.0166667	1.24	0.166667	0.001	6.21723	0.0344717	-7.38082	1	-10.2761	0.0195757	3.32193	1	gi|656906706|gb|KEF52448.1|	hypothetical protein A1O9_11689 [Exophiala aquamarina CBS 119918]	pan:PODANSg09606	hypothetical protein	--	--	--	--	--
Zoff050820	2	2	2	4	1	63	1	0	9	1	0	0	0.1	0.1	0.1	0.2	0.06	3.13	0.05	0	0.45	0.05	0	0	0.1	1.13	0.166667	0.0166667	3.49825	0.134708	-3.32193	1	-6.08321	0.0293711	0.736966	1	gi|628337195|ref|XP_007746265.1|	hypothetical protein A1O5_07486 [Cladophialophora psammophila CBS 110553]	fgr:FG05940.1	hypothetical protein	At4g36580	[O] KOG0742 AAA+-type ATPase	sp|Q5T9A4|ATD3B_HUMAN	ATPase family AAA domain-containing protein 3B OS=Homo sapiens GN=ATAD3B PE=1 SV=1	GO:0005524,aaa family atpase
Zoff050913	76.56	88.9	131.8	38.05	69.95	36.03	105.93	28.1	142.15	5.61	10.66	4	3.77	4.45	6.51	1.87	4.02	1.79	5.36	1.39	7.16	0.28	0.55	0.2	4.91	2.56	4.63667	0.343333	-0.939579	0.633975	-3.75541	0.0315695	-2.89846	0.00736079	-0.082635	1	gi|695021596|ref|XP_009397891.1|	PREDICTED: probable inorganic phosphate transporter 1-8 [Musa acuminata subsp. malaccensis]	osa:4335115	Os04g0186400; K08176 MFS transporter, PHS family, inorganic phosphate transporter	At2g32830	[P] KOG0252 Inorganic phosphate transporter	sp|Q8H6H2|PHT14_ORYSJ	Probable inorganic phosphate transporter 1-4 OS=Oryza sativa subsp. japonica GN=PHT1-4 PE=2 SV=1	GO:0006817,phosphate transporter; GO:0016021,phosphate transporter; GO:0005315,phosphate transporter; GO:0055085,phosphate transporter; GO:0015293,phosphate transporter
Zoff050914	86.28	92.1	109.94	37.95	52.48	39.35	85.56	44.9	137.64	8.39	1.34	1	4.25	4.61	5.43	1.87	3.01	1.95	4.33	2.22	6.93	0.43	0.07	0.05	4.76333	2.27667	4.49333	0.183333	-1.06505	0.272786	-4.61525	0.0129435	-3.63438	0.0025788	-0.0841854	1	gi|695021596|ref|XP_009397891.1|	PREDICTED: probable inorganic phosphate transporter 1-8 [Musa acuminata subsp. malaccensis]	osa:4335115	Os04g0186400; K08176 MFS transporter, PHS family, inorganic phosphate transporter	At2g32830	[P] KOG0252 Inorganic phosphate transporter	sp|Q8H6H2|PHT14_ORYSJ	Probable inorganic phosphate transporter 1-4 OS=Oryza sativa subsp. japonica GN=PHT1-4 PE=2 SV=1	GO:0006817,probable inorganic phosphate transporter 1-8; GO:0016021,probable inorganic phosphate transporter 1-8; GO:0005315,probable inorganic phosphate transporter 1-8; GO:0055085,probable inorganic phosphate transporter 1-8; GO:0015293,probable inorganic phosphate transporter 1-8
Zoff050924	32	16	45	6	6	1	14	8	10	10	22	9	1.57	0.8	2.22	0.3	0.34	0.05	0.71	0.4	0.5	0.51	1.14	0.44	1.53	0.23	0.536667	0.696667	-2.73383	0.00894285	0.376442	1	1.59883	0.647998	-1.51143	0.993134	gi|695040212|ref|XP_009407671.1|	PREDICTED: putative disease resistance protein At5g47280 [Musa acuminata subsp. malaccensis]	sbi:SORBI_08g019690	hypothetical protein	--	--	sp|Q9SZA7|DRL29_ARATH	Probable disease resistance protein At4g33300 OS=Arabidopsis thaliana GN=At4g33300 PE=2 SV=3	GO:0043531,disease resistance protein at5g47280
Zoff050929	13	26	17	40	18	15	11	14	15	3	3	5	0.64	1.3	0.84	1.97	1.03	0.74	0.56	0.69	0.76	0.15	0.16	0.25	0.926667	1.24667	0.67	0.186667	0.427953	1	-1.8437	0.837148	-2.73954	0.028155	-0.467889	1	gi|695012713|ref|XP_009393123.1|	PREDICTED: DUF21 domain-containing protein At4g14240-like isoform X2 [Musa acuminata subsp. malaccensis]	rcu:RCOM_0176310	hypothetical protein	At1g03270	[S] KOG2118 Predicted membrane protein, contains two CBS domains	sp|Q9ZVS8|Y1327_ARATH	Putative DUF21 domain-containing protein At1g03270 OS=Arabidopsis thaliana GN=CBSDUF4 PE=4 SV=2	GO:0016021,duf21 domain-containing protein at4g14240-like; GO:0030554,duf21 domain-containing protein at4g14240-like
Zoff050981	79.24	175.78	33.35	128.47	82.81	93.15	137.08	285.35	116.89	19.26	11.24	33.58	3.9	8.81	1.65	6.32	4.76	4.62	6.93	14.13	5.89	0.98	0.58	1.66	4.78667	5.23333	8.98333	1.07333	0.128709	1	-3.06515	0.042271	-2.28563	0.0167125	0.90823	1	gi|695046384|ref|XP_009411019.1|	PREDICTED: F-box protein SNE-like [Musa acuminata subsp. malaccensis]	osa:4331940	Os03g0196500	--	--	sp|Q9LUB6|SNE_ARATH	F-box protein SNE OS=Arabidopsis thaliana GN=SNE PE=1 SV=1	GO:0009740,f-box protein sne-like; GO:0044424,f-box protein sne-like
Zoff050982	35.76	72.22	18.65	112.53	129.19	108.85	54.92	161.65	77.11	14.74	34.76	31.42	1.76	3.62	0.92	5.54	7.42	5.4	2.78	8.01	3.88	0.75	1.8	1.55	2.1	6.12	4.89	1.36667	1.54314	0.117883	-1.83917	0.465602	-2.16287	0.019437	1.21945	1	gi|695046384|ref|XP_009411019.1|	PREDICTED: F-box protein SNE-like [Musa acuminata subsp. malaccensis]	osa:4331940	Os03g0196500	--	--	sp|Q9LUB6|SNE_ARATH	F-box protein SNE OS=Arabidopsis thaliana GN=SNE PE=1 SV=1	GO:0009740,f-box protein sne-like; GO:0044424,f-box protein sne-like
Zoff050988	0	0	0	16	3	6	0	0	0	2	2	3	0	0	0	0.79	0.17	0.3	0	0	0	0.1	0.1	0.15	0.001	0.42	0.001	0.116667	8.71425	0.0162895	6.86625	0.988843	-1.848	0.712202	0	1	gi|576982870|gb|EUC55613.1|	phosphatidylinositol 3-kinase tor2 [Rhizoctonia solani AG-3 Rhs1AP]	cci:CC1G_00894	atypical/PIKK/FRAP protein kinase; K07203 FKBP12-rapamycin complex-associated protein	SPBC216.07c	[L] KOG0891 DNA-dependent protein kinase	sp|Q9Y7K2|TOR2_SCHPO	Phosphatidylinositol 3-kinase tor2 OS=Schizosaccharomyces pombe (strain 972 / ATCC 24843) GN=tor2 PE=1 SV=2	GO:0016773,atypical pikk frap protein kinase; GO:0016301,atypical pikk frap protein kinase; GO:0016310,atypical pikk frap protein kinase; GO:0008144,atypical pikk frap protein kinase; GO:0005524,atypical pikk frap protein kinase
Zoff051001	2	1	0	3	1	62	1	0	6	1	0	0	0.1	0.05	0	0.15	0.06	3.08	0.05	0	0.3	0.05	0	0	0.05	1.09667	0.116667	0.0166667	4.45505	0.075633	-2.80735	1	-6.04002	0.03611	1.22239	1	gi|656910872|gb|KEF56505.1|	hypothetical protein A1O9_06692 [Exophiala aquamarina CBS 119918]	act:ACLA_070120	thioesterase family protein	CE24969	[R] KOG3328 HGG motif-containing thioesterase	sp|Q9CQR4|ACO13_MOUSE	Acyl-coenzyme A thioesterase 13 OS=Mus musculus GN=Acot13 PE=1 SV=1	--
Zoff051025	4	6	6	21	4	42	1	2	35	1	0	0	0.2	0.3	0.3	1.03	0.23	2.08	0.05	0.1	1.76	0.05	0	0	0.266667	1.11333	0.636667	0.0166667	2.06178	0.210242	-5.2555	0.325187	-6.06178	0.00268249	1.2555	1	gi|628298345|ref|XP_007758813.1|	large subunit ribosomal protein L24e [Cladophialophora yegresii CBS 114405]	cpw:CPC735_045520	60S ribosomal protein L24, putative; K02896 large subunit ribosomal protein L24e	SPAC22E12.13c	[J] KOG1723 60s ribosomal protein L30 isolog	sp|Q10353|RLP24_SCHPO	Ribosome biogenesis protein rlp24 OS=Schizosaccharomyces pombe (strain 972 / ATCC 24843) GN=rlp24 PE=3 SV=1	GO:0005840,ribosome biogenesis protein rlp24; GO:0042254,ribosome biogenesis protein rlp24
Zoff051047	0	3	0	10	0	31	1	0	5	0	0	0	0	0.15	0	0.49	0	1.54	0.05	0	0.25	0	0	0	0.05	0.676667	0.1	0.001	3.75845	0.23752	-6.64386	1	-9.4023	0.0345162	1	1	gi|656912711|gb|KEF58293.1|	fructose-6-phosphate 2-kinase/fructose-2, 6-biphosphatase [Exophiala aquamarina CBS 119918]	ang:ANI_1_258064	An07g02100; fructose-2,6-bisphosphatase; K01103 6-phosphofructo-2-kinase / fructose-2,6-bisphosphatase [EC:2.7.1.105 3.1.3.46]	YJL155c	[G] KOG0234 Fructose-6-phosphate 2-kinase/fructose-2,6-biphosphatase	sp|P32604|F26_YEAST	Fructose-2,6-bisphosphatase OS=Saccharomyces cerevisiae (strain ATCC 204508 / S288c) GN=FBP26 PE=1 SV=2	GO:0006000,fructose- -bisphosphatase; GO:0046835,fructose- -bisphosphatase; GO:0004331,fructose- -bisphosphatase; GO:0016311,fructose- -bisphosphatase; GO:0003873,fructose- -bisphosphatase; GO:0006003,fructose- -bisphosphatase; GO:0005524,fructose- -bisphosphatase
Zoff051064	0	0	0	7.86	7	7	0	0	0	2.57	0	0.61	0	0	0	0.39	0.4	0.35	0	0	0	0.13	0	0.03	0.001	0.38	0.001	0.0533333	8.56986	0.0104904	5.73697	1	-2.83289	0.274819	0	1	gi|639572277|gb|KDN49676.1|	Sorting nexin-3, partial [Rhizoctonia solani AG-8 WAC10335]	lbc:LACBIDRAFT_192076	hypothetical protein	SPBC887.06c	[U] KOG2527 Sorting nexin SNX11	sp|P0CR60|SNX3_CRYNJ	Sorting nexin-3 OS=Cryptococcus neoformans var. neoformans serotype D (strain JEC21 / ATCC MYA-565) GN=SNX3 PE=3 SV=1	GO:0035091,px-domain-containing protein
Zoff051094	4	4	2	9	5	16	1	3	11	0	1	0	0.2	0.2	0.1	0.44	0.29	0.79	0.05	0.15	0.55	0	0.05	0	0.166667	0.506667	0.25	0.0166667	1.60407	0.630081	-3.90689	0.846783	-4.926	0.0292289	0.584963	1	gi|671174170|ref|XP_008727549.1|	hypothetical protein G647_04991 [Cladophialophora carrionii CBS 160.54]	ssl:SS1G_03164	hypothetical protein ; K03509 DNA polymerase eta subunit [EC:2.7.7.7]	SPBC16A3.11_1	[L] KOG2095 DNA polymerase iota/DNA damage inducible protein	sp|O42917|ESO1_SCHPO	N-acetyltransferase eso1 OS=Schizosaccharomyces pombe (strain 972 / ATCC 24843) GN=eso1 PE=1 SV=1	GO:0006259,dna polymerase eta subunit; GO:0005488,dna polymerase eta subunit
Zoff051113	0	0	0	91.98	19	34	1	0	1	5	2	1	0	0	0	4.53	1.09	1.69	0.05	0	0.05	0.25	0.1	0.05	0.001	2.43667	0.0333333	0.133333	11.2507	1.77e-08	2	1	-4.1918	0.00106086	5.05889	1	gi|660958354|gb|KEP46200.1|	endoplasmic reticulum protein [Rhizoctonia solani 123E]	scm:SCHCODRAFT_70229	hypothetical protein	Hs20470446	[S] KOG2103 Uncharacterized conserved protein	sp|Q8C7X2|EMC1_MOUSE	ER membrane protein complex subunit 1 OS=Mus musculus GN=Emc1 PE=1 SV=1	GO:0072546,duf1620-domain-containing protein
Zoff051119	0	0	0	17	2	4	0	1	4	10	4	2	0	0	0	0.84	0.11	0.2	0	0.05	0.2	0.51	0.21	0.1	0.001	0.383333	0.0833333	0.273333	8.58246	0.0388626	1.7137	1	-0.487938	1	6.38082	1	gi|660970265|gb|KEP54056.1|	Gti1/Pac2 family protein [Rhizoctonia solani 123E]	lbc:LACBIDRAFT_318661	hypothetical protein	SPAC1751.01c	[TG] KOG4476 Gluconate transport-inducing protein	--	--	--
Zoff051173	3	1	0	7	4	45	1	0	5	0	0	1	0.15	0.05	0	0.34	0.23	2.23	0.05	0	0.25	0	0	0.05	0.0666667	0.933333	0.1	0.0166667	3.80735	0.0457399	-2.58496	1	-5.80735	0.0116829	0.584963	1	gi|656915492|gb|KEF61071.1|	hypothetical protein A1O9_02636 [Exophiala aquamarina CBS 119918]	afv:AFLA_023440	acyltransferase, putative	--	--	--	--	GO:0016746,hypothetical protein HMPREF1120_08011 [Exophiala dermatitidis NIH
Zoff051208	0	0	0	6.06	1.43	16.7	3	0	4	0	1	0	0	0	0	0.3	0.08	0.83	0.15	0	0.2	0	0.05	0	0.001	0.403333	0.116667	0.0166667	8.65583	0.0328817	-2.80735	1	-4.59694	0.131109	6.86625	1	gi|255965366|gb|ACU44988.1|	60s ribosomal protein l9 [Pfiesteria piscicida]	osa:4347422	Os09g0485900; K02940 large subunit ribosomal protein L9e	Hs14720157	[J] KOG3255 60S ribosomal protein L9	sp|P49210|RL9_ORYSJ	60S ribosomal protein L9 OS=Oryza sativa subsp. japonica GN=RPL9 PE=2 SV=3	GO:0030529,60s ribosomal protein l9
Zoff051212	5	2	2	28	3	47	2	2	24	0	0	0	0.25	0.1	0.1	1.38	0.17	2.33	0.1	0.1	1.21	0	0	0	0.15	1.29333	0.47	0.001	3.10806	0.0331062	-8.87652	0.209534	-10.3369	0.000564471	1.6477	1	gi|656917682|gb|KEF63260.1|	hypothetical protein A1O9_01237 [Exophiala aquamarina CBS 119918]	pno:SNOG_00119	hypothetical protein	At3g16170	[I] KOG1176 Acyl-CoA synthetase	sp|Q6GLK6|ACSF3_XENLA	Acyl-CoA synthetase family member 3, mitochondrial OS=Xenopus laevis GN=acsf3 PE=2 SV=1	GO:0016874,acyl- synthetase; GO:0008152,acyl- synthetase
Zoff051255	9	7	8	59	15	371	8	7	112	2	1	0	0.44	0.35	0.39	2.9	0.86	18.41	0.4	0.35	5.64	0.1	0.05	0	0.393333	7.39	2.13	0.05	4.23175	0.00138342	-5.41278	0.0542044	-7.2075	5.69e-05	2.43703	0.807823	gi|723185913|gb|KHC59757.1|	hypothetical protein MGE_04085 [Candida albicans P75010]	cal:CaO19.4149	hypothetical protein	--	--	--	--	--
Zoff051275	0	0	0	13	1	8	0	0	1	1	0	2	0	0	0	0.64	0.06	0.4	0	0	0.05	0.05	0	0.1	0.001	0.366667	0.0166667	0.05	8.51833	0.0417785	1.58496	1	-2.87447	0.47445	4.05889	1	gi|471912880|emb|CCO27121.1|	threonine dehydratase [Rhizoctonia solani AG-1 IB]	kdi:Krodi_2837	hypothetical protein	--	--	--	--	GO:0008152,ketosteroid isomerase
Zoff051314	0	0	0	19	2	4	0	0	0	3	2	2	0	0	0	0.94	0.11	0.2	0	0	0	0.15	0.1	0.1	0.001	0.416667	0.001	0.116667	8.70275	0.0328982	6.86625	1	-1.8365	0.864038	0	1	gi|471915491|emb|CCO26449.1|	Pre-mRNA-splicing factor ISY1 [Rhizoctonia solani AG-1 IB]	cci:CC1G_07497	pre-mRNA-splicing factor ISY1; K12870 pre-mRNA-splicing factor ISY1	7298990	[A] KOG3068 mRNA splicing factor	sp|P0CO36|ISY1_CRYNJ	Pre-mRNA-splicing factor ISY1 OS=Cryptococcus neoformans var. neoformans serotype D (strain JEC21 / ATCC MYA-565) GN=ISY1 PE=3 SV=1	--
Zoff051316	0	0	0	3	3	49	0	2	6	0	0	0	0	0	0	0.15	0.17	2.43	0	0.1	0.3	0	0	0	0.001	0.916667	0.133333	0.001	9.84025	0.00581491	-7.05889	1	-9.84025	0.0103497	7.05889	1	gi|656918072|gb|KEF63650.1|	oxidoreductase [Exophiala aquamarina CBS 119918]	ani:AN8819.2	hypothetical protein	SPAC8E11.10	[R] KOG0725 Reductases with broad range of substrate specificities	sp|Q6CEE9|SDR_YARLI	Probable NADP-dependent mannitol dehydrogenase OS=Yarrowia lipolytica (strain CLIB 122 / E 150) GN=YALI0B16192g PE=1 SV=1	GO:0050085,carbonyl reductase; GO:0050038,carbonyl reductase; GO:0005997,carbonyl reductase; GO:0019594,carbonyl reductase; GO:0055114,carbonyl reductase; GO:0000166,carbonyl reductase
Zoff051478	0	0	0	15	9	5	0	1	3	10	1	1	0	0	0	0.74	0.52	0.25	0	0.05	0.15	0.51	0.05	0.05	0.001	0.503333	0.0666667	0.203333	8.97537	0.00353543	1.60881	1	-1.30767	1	6.05889	1	gi|639572127|gb|KDN49529.1|	hypothetical protein RSAG8_02231, partial [Rhizoctonia solani AG-8 WAC10335]	scm:SCHCODRAFT_77346	hypothetical protein; K08150 MFS transporter, SP family, solute carrier family 2 (myo-inositol transporter), member 13	YOL103w	[R] KOG0254 Predicted transporter (major facilitator superfamily)	sp|Q10286|ITR1_SCHPO	Myo-inositol transporter 1 OS=Schizosaccharomyces pombe (strain 972 / ATCC 24843) GN=itr1 PE=3 SV=1	GO:0016021,general substrate transporter; GO:0022891,general substrate transporter; GO:0055085,general substrate transporter; GO:0008643,general substrate transporter
Zoff051490	0.5	0.5	0	0	0	0	0.5	0	0	5.5	0	144.54	0.02	0.03	0	0	0	0	0.03	0	0	0.28	0	7.15	0.0166667	0.001	0.01	2.47667	-4.05889	1	7.95226	0.0528554	11.2742	0.00817215	-0.736966	1	gi|695380365|ref|XP_009516788.1|	hypothetical protein PHYSODRAFT_294642 [Phytophthora sojae]	pif:PITG_19535	proteasome subunit beta, putative; K02736 20S proteasome subunit beta 7 [EC:3.4.25.1]	At1g56450	[O] KOG0185 20S proteasome, regulatory subunit beta type PSMB4/PRE4	sp|Q7DLR9|PSB4_ARATH	Proteasome subunit beta type-4 OS=Arabidopsis thaliana GN=PBG1 PE=1 SV=2	GO:0005737,proteasome subunit beta type-4-like; GO:0005839,proteasome subunit beta type-4-like; GO:0005634,proteasome subunit beta type-4-like; GO:0004298,proteasome subunit beta type-4-like; GO:0051603,proteasome subunit beta type-4-like
Zoff051491	0.5	0.5	0	0	0	0	0.5	0	0	5.5	0	63.46	0.02	0.03	0	0	0	0	0.03	0	0	0.28	0	3.14	0.0166667	0.001	0.01	1.14	-4.05889	1	6.83289	0.0909667	10.1548	0.0198777	-0.736966	1	gi|695380365|ref|XP_009516788.1|	hypothetical protein PHYSODRAFT_294642 [Phytophthora sojae]	pif:PITG_19535	proteasome subunit beta, putative; K02736 20S proteasome subunit beta 7 [EC:3.4.25.1]	At1g56450	[O] KOG0185 20S proteasome, regulatory subunit beta type PSMB4/PRE4	sp|Q7DLR9|PSB4_ARATH	Proteasome subunit beta type-4 OS=Arabidopsis thaliana GN=PBG1 PE=1 SV=2	GO:0043161,proteasome subunit beta type-4-like; GO:0009651,proteasome subunit beta type-4-like; GO:0051788,proteasome subunit beta type-4-like; GO:0080129,proteasome subunit beta type-4-like; GO:0004298,proteasome subunit beta type-4-like; GO:0006635,proteasome subunit beta type-4-like; GO:0006094,proteasome subunit beta type-4-likeGO:0046686,proteasome subunit beta type-4-likeGO:0009407,proteaso…
Zoff051531	0	0	0	0	1	0	0	0	1	5	0	89	0	0	0	0	0.06	0	0	0	0.05	0.25	0	4.4	0.001	0.02	0.0166667	1.55	4.32193	1	6.53916	0.132624	6.27612	0.0317322	4.05889	1	gi|325183696|emb|CCA18155.1|	histone H2A variant 1 putative [Albugo laibachii Nc14]	pif:PITG_02527	histone H2A variant 1; K11251 histone H2A	Hs4504255	[B] KOG1757 Histone 2A	sp|Q84MP7|H2AV3_ORYSJ	Probable histone H2A variant 3 OS=Oryza sativa subsp. japonica GN=Os03g0743400 PE=2 SV=1	GO:0046982,histone h2a; GO:0000786,histone h2a; GO:0005634,histone h2a; GO:0003677,histone h2a
Zoff051594	0	0	0	26	7	16	0	0	0	0	0	0	0	0	0	1.28	0.4	0.79	0	0	0	0	0	0	0.001	0.823333	0.001	0.001	9.68533	9.16e-05	0	1	-9.68533	0.00102082	0	1	gi|576988635|gb|EUC61359.1|	DNA replication licensing factor mcm4 [Rhizoctonia solani AG-3 Rhs1AP]	lbc:LACBIDRAFT_248146	hypothetical protein; K02212 minichromosome maintenance protein 4 (cell division control protein 54)	YPR019w	[L] KOG0478 DNA replication licensing factor, MCM4 component	sp|P30665|MCM4_YEAST	DNA replication licensing factor MCM4 OS=Saccharomyces cerevisiae (strain ATCC 204508 / S288c) GN=MCM4 PE=1 SV=2	GO:0006267,mcm-domain-containing protein; GO:0043140,mcm-domain-containing protein; GO:0006268,mcm-domain-containing protein; GO:0051301,mcm-domain-containing protein; GO:0005656,mcm-domain-containing protein; GO:0043142,mcm-domain-containing protein; GO:0003697,mcm-domain-containing proteinGO:0005737,mcm-domain-containing proteinGO:0000727,mcm-domain-containing proteinGO:0003688,mcm-domain-conta…
Zoff051620	1	0	0	0	0	0	0	0	0	4	0	54	0.05	0	0	0	0	0	0	0	0	0.2	0	2.67	0.0166667	0.001	0.001	0.956667	-4.05889	1	9.90187	0.12929	9.90187	0.0316295	-4.05889	1	gi|669150050|ref|XP_008610587.1|	S-phase kinase-associated protein 1 [Saprolegnia diclina VS20]	pif:PITG_01260	S-phase kinase-associated protein 1A; K03094 S-phase kinase-associated protein 1	Hs4507387	[O] KOG1724 SCF ubiquitin ligase, Skp1 component	sp|C5FHU9|SKP1_ARTOC	E3 ubiquitin ligase complex SCF subunit sconC OS=Arthroderma otae (strain ATCC MYA-4605 / CBS 113480) GN=sconC PE=3 SV=1	GO:0016301,skp1-like protein; GO:0016310,skp1-like protein; GO:0006511,skp1-like protein
Zoff051632	2	0	12	10	22	26	24	8	1	0	1	0	0.1	0	0.59	0.49	1.26	1.29	1.21	0.4	0.05	0	0.05	0	0.23	1.01333	0.553333	0.0166667	2.1394	0.32378	-5.05311	0.27243	-5.926	0.000975841	1.26651	1	gi|695004122|ref|XP_009388459.1|	PREDICTED: thioredoxin H2-2-like [Musa acuminata subsp. malaccensis]	osa:4334453	Os03g0800700; K03671 thioredoxin 1	At5g39950	[O] KOG0907 Thioredoxin	sp|Q851R5|TRH22_ORYSJ	Thioredoxin H2-2 OS=Oryza sativa subsp. japonica GN=Os03g0800700 PE=2 SV=1	GO:0000280,thioredoxin h2-2; GO:0016671,thioredoxin h2-2; GO:0005886,thioredoxin h2-2; GO:0009055,thioredoxin h2-2; GO:0045454,thioredoxin h2-2; GO:0006662,thioredoxin h2-2; GO:0005829,thioredoxin h2-2GO:0000103,thioredoxin h2-2GO:0015035,thioredoxin h2-2GO:0007000,thioredoxin h2-2GO:0005739,thioredoxin h2-2GO:0055114,thioredoxin h2-2
Zoff051648	0	3	0	3	1	34	0	1	8	0	0	0	0	0.15	0	0.15	0.06	1.69	0	0.05	0.4	0	0	0	0.05	0.633333	0.15	0.001	3.66297	0.27886	-7.22882	1	-9.30682	0.0378476	1.58496	1	gi|656907069|gb|KEF52809.1|	hypothetical protein A1O9_11226 [Exophiala aquamarina CBS 119918]	afm:AFUA_1G09640	actin-interacting protein (Bud6/Aip3)	--	--	sp|P41697|BUD6_YEAST	Bud site selection protein 6 OS=Saccharomyces cerevisiae (strain ATCC 204508 / S288c) GN=BUD6 PE=1 SV=1	--
Zoff051703	8	9	10	70	25	384	7	3	105	3	5	1	0.39	0.45	0.49	3.45	1.44	19.05	0.35	0.15	5.29	0.15	0.26	0.05	0.443333	7.98	1.93	0.153333	4.16993	0.000437435	-3.65386	0.258777	-5.70165	0.00013596	2.12214	1	gi|628289971|ref|XP_007756450.1|	40S ribosomal protein S19 [Cladophialophora yegresii CBS 114405]	ani:AN4060.2	RS19_EMENI 40S RIBOSOMAL PROTEIN S19 (S16); K02966 small subunit ribosomal protein S19e	SPBC649.02	[J] KOG3411 40S ribosomal protein S19	sp|P27073|RS19_EMENI	40S ribosomal protein S19 OS=Emericella nidulans (strain FGSC A4 / ATCC 38163 / CBS 112.46 / NRRL 194 / M139) GN=rps19 PE=3 SV=1	GO:0003735,40s ribosomal protein s19; GO:0022627,40s ribosomal protein s19; GO:0042274,40s ribosomal protein s19; GO:0006412,40s ribosomal protein s19
Zoff051801	1	0	1	0	0	0	0	0	0	7	0	81	0.05	0	0.05	0	0	0	0	0	0	0.36	0	4	0.0333333	0.001	0.001	1.45333	-5.05889	1	10.5051	0.0675935	10.5051	0.0114671	-5.05889	1	gi|568034213|gb|ETM31889.1|	hypothetical protein L914_20610 [Phytophthora parasitica]	pif:PITG_08956	DNA repair protein REV1; K03515 DNA repair protein REV1 [EC:2.7.7.-]	Hs7706681	[L] KOG2093 Translesion DNA polymerase - REV1 deoxycytidyl transferase	sp|A3EWL3|REV1_ARATH	DNA repair protein REV1 OS=Arabidopsis thaliana GN=REV1 PE=2 SV=1	--
Zoff051833	0	0	0	0	0	0	0	0	0	7	1	65	0	0	0	0	0	0	0	0	0	0.36	0.05	3.21	0.001	0.001	0.001	1.20667	0	1	10.2368	0.0518592	10.2368	0.00699792	0	1	gi|567947552|gb|ETK73330.1|	hypothetical protein L915_19730 [Phytophthora parasitica]	ath:AT3G01770	ATBET10 (Arabidopsis thaliana BROMODOMAIN AND EXTRATERMINAL DOMAIN PROTEIN 10); DNA binding	At3g01770	[K] KOG1474 Transcription initiation factor TFIID, subunit BDF1 and related bromodomain proteins	sp|Q93ZB7|GTE11_ARATH	Transcription factor GTE11 OS=Arabidopsis thaliana GN=GTE11 PE=1 SV=1	GO:0045893,bromodomain containing 2; GO:0044699,bromodomain containing 2; GO:0005515,bromodomain containing 2
Zoff051848	0	1	0	1	0	0	0	0	0	10.13	0	170.79	0	0.05	0	0.05	0	0	0	0	0	0.51	0	8.44	0.0166667	0.0166667	0.001	2.98333	0	1	11.5427	0.0421477	7.48382	0.011491	-4.05889	1	gi|675213939|ref|XP_008915854.1|	peptidyl-prolyl cis-trans isomerase [Phytophthora parasitica INRA-310]	pif:PITG_04522	peptidyl-prolyl cis-trans isomerase	At2g21130	[O] KOG0865 Cyclophilin type peptidyl-prolyl cis-trans isomerase	sp|P21569|CYPH_MAIZE	Peptidyl-prolyl cis-trans isomerase OS=Zea mays GN=CYP PE=1 SV=1	GO:0006457,peptidyl-prolyl cis-trans isomerase; GO:0000413,peptidyl-prolyl cis-trans isomerase; GO:0003755,peptidyl-prolyl cis-trans isomerase
Zoff051849	0	0	0	0	0	0	1	0	0	7.87	0	63.21	0	0	0	0	0	0	0.05	0	0	0.4	0	3.12	0.001	0.001	0.0166667	1.17333	0	1	6.1375	0.15142	10.1964	0.0149801	4.05889	1	gi|675213939|ref|XP_008915854.1|	peptidyl-prolyl cis-trans isomerase [Phytophthora parasitica INRA-310]	pif:PITG_04522	peptidyl-prolyl cis-trans isomerase	At2g21130	[O] KOG0865 Cyclophilin type peptidyl-prolyl cis-trans isomerase	sp|P21569|CYPH_MAIZE	Peptidyl-prolyl cis-trans isomerase OS=Zea mays GN=CYP PE=1 SV=1	GO:0006457,peptidyl-prolyl cis-trans isomerase; GO:0000413,peptidyl-prolyl cis-trans isomerase; GO:0003755,peptidyl-prolyl cis-trans isomerase
Zoff051854	0	0	0	0	0	0	0	0	0	11	0	65	0	0	0	0	0	0	0	0	0	0.56	0	3.21	0.001	0.001	0.001	1.25667	0	1	10.2954	0.0671262	10.2954	0.0108812	0	1	gi|301117434|ref|XP_002906445.1|	cell division protein ftsZ [Phytophthora infestans T30-4]	pif:PITG_03373	cell division protein ftsZ	--	--	sp|Q92GV7|FTSZ_RICCN	Cell division protein FtsZ OS=Rickettsia conorii (strain ATCC VR-613 / Malish 7) GN=ftsZ PE=3 SV=1	GO:0005874,cell division protein; GO:0051301,cell division protein; GO:0051258,cell division protein; GO:0006184,cell division protein; GO:0003924,cell division protein; GO:0005737,cell division protein; GO:0005525,cell division protein
Zoff051943	0	1	0	2	1	58	0	0	5	0	0	0	0	0.05	0	0.1	0.06	2.88	0	0	0.25	0	0	0	0.0166667	1.01333	0.0833333	0.001	5.926	0.0365441	-6.38082	1	-9.98489	0.0200355	2.32193	1	gi|656907057|gb|KEF52797.1|	[acyl-carrier-protein] S-malonyltransferase [Exophiala aquamarina CBS 119918]	aor:AOR_1_2034144	AO090672000003; malonyl CoA-acyl carrier protein transacylase; K00645 [acyl-carrier-protein] S-malonyltransferase [EC:2.3.1.39]	At2g30200	[I] KOG2926 Malonyl-CoA:ACP transacylase	sp|P71019|FABD_BACSU	Malonyl CoA-acyl carrier protein transacylase OS=Bacillus subtilis (strain 168) GN=fabD PE=3 SV=2	GO:0008152,malonyl -acyl carrier protein transacylase; GO:0016740,malonyl -acyl carrier protein transacylase
Zoff052064	0	0	0	0	0	0	0	0	0	3	0	119	0	0	0	0	0	0	0	0	0	0.15	0	5.88	0.001	0.001	0.001	2.01	0	1	10.973	0.0715597	10.973	0.0132331	0	1	gi|570985534|gb|ETP44795.1|	CMGC/CDK/CRK7 protein kinase, variant [Phytophthora parasitica P10297]	olu:OSTLU_3057	hypothetical protein; K08819 Cdc2-related kinase, arginine/serine-rich [EC:2.7.11.22]	At5g64960	[D] KOG0600 Cdc2-related protein kinase	sp|Q5JK68|CDKC2_ORYSJ	Cyclin-dependent kinase C-2 OS=Oryza sativa subsp. japonica GN=CDKC-2 PE=2 SV=1	GO:0006468,cmgc cdk crk7 protein variant; GO:0005524,cmgc cdk crk7 protein variant; GO:0004674,cmgc cdk crk7 protein variant
Zoff052163	3	2	1	3	6	32	0	1	20	1	0	0	0.15	0.1	0.05	0.15	0.34	1.59	0	0.05	1.01	0.05	0	0	0.1	0.693333	0.353333	0.0166667	2.79355	0.19711	-4.40599	0.923908	-5.37851	0.031021	1.82103	1	gi|628267129|ref|XP_007726921.1|	hypothetical protein A1O1_07865 [Capronia coronata CBS 617.96]	pan:PODANSg325	hypothetical protein	--	--	--	--	GO:0016740,s-adenosyl-l-methionine-dependent methyltransferase
Zoff052177	4	4	0	13	8	41	2	0	10	0	1	3	0.2	0.2	0	0.64	0.46	2.03	0.1	0	0.5	0	0.05	0.15	0.133333	1.04333	0.2	0.0666667	2.96809	0.0416951	-1.58496	1	-3.96809	0.0183626	0.584963	1	gi|656913056|gb|KEF58638.1|	hypothetical protein A1O9_06564 [Exophiala aquamarina CBS 119918]	nfi:NFIA_079450	hypothetical protein	SPBC216.01c	[G] KOG2175 Protein predicted to be involved in carbohydrate metabolism	sp|Q9Y7J8|YGL1_SCHPO	Uncharacterized protein C216.01c OS=Schizosaccharomyces pombe (strain 972 / ATCC 24843) GN=SPBC216.01c PE=2 SV=3	--
Zoff052249	7	9.04	7.72	8.66	11	7	9.76	1.57	4	0	1	0	0.34	0.45	0.38	0.43	0.63	0.35	0.49	0.08	0.2	0	0.05	0	0.39	0.47	0.256667	0.0166667	0.269187	1	-3.94486	0.751448	-4.81762	0.0358684	-0.603578	1	gi|695047169|ref|XP_009411454.1|	PREDICTED: post-GPI attachment to proteins factor 3-like isoform X2 [Musa acuminata subsp. malaccensis]	zma:100274102	hypothetical protein LOC100274102	At1g16560	[S] KOG2970 Predicted membrane protein	sp|A8WFS8|PGAP3_DANRE	Post-GPI attachment to proteins factor 3 OS=Danio rerio GN=pgap3 PE=2 SV=1	GO:0016023,post-gpi attachment to proteins factor 3-like
Zoff052299	0	0	0	20.6	6.8	6.71	0	0	2	3	1	0	0	0	0	1.01	0.39	0.33	0	0	0.1	0.15	0.05	0	0.001	0.576667	0.0333333	0.0666667	9.17159	0.0021448	1	1	-3.1127	0.156276	5.05889	1	gi|471909518|emb|CCO28015.1|	hypothetical protein BN14_02006 [Rhizoctonia solani AG-1 IB]	cci:CC1G_01390	hypothetical protein	Hs5174637	[O] KOG0111 Cyclophilin-type peptidyl-prolyl cis-trans isomerase	sp|Q9QZH3|PPIE_MOUSE	Peptidyl-prolyl cis-trans isomerase E OS=Mus musculus GN=Ppie PE=2 SV=2	GO:0003676,rna-binding domain-containing protein; GO:0000166,rna-binding domain-containing protein
Zoff052366	0	4	0	16	3	120	1	0	23	1	2	0	0	0.2	0	0.79	0.17	5.95	0.05	0	1.16	0.05	0.1	0	0.0666667	2.30333	0.403333	0.05	5.11061	0.0110922	-3.01197	1	-5.52565	0.00603705	2.59694	1	gi|656908953|gb|KEF54663.1|	hypothetical protein A1O9_09105 [Exophiala aquamarina CBS 119918]	afv:AFLA_067860	tyrosinase, putative; K00505 tyrosinase [EC:1.14.18.1]	--	--	sp|P06845|TYRO_STRGA	Tyrosinase OS=Streptomyces glaucescens GN=melC2 PE=1 SV=3	GO:0004097,a chain crystal structure of truncated catechol oxidase from aspergillus oryzae; GO:0046872,a chain crystal structure of truncated catechol oxidase from aspergillus oryzae; GO:0055114,a chain crystal structure of truncated catechol oxidase from aspergillus oryzae
Zoff052385	0	0	3	6.46	1	19	1	0	0	0	0	0	0	0	0.15	0.32	0.06	0.94	0.05	0	0	0	0	0	0.05	0.44	0.0166667	0.001	3.1375	0.373614	-4.05889	1	-8.78136	0.0460711	-1.58496	1	gi|671173432|ref|XP_008727182.1|	hypothetical protein G647_04620 [Cladophialophora carrionii CBS 160.54]	cim:CIMG_08487	hypothetical protein	--	--	--	--	GO:0008270,zinc knuckle containing protein; GO:0003676,zinc knuckle containing protein
Zoff052442	4	5	1	13	2	41	2	1	16	1	0	0	0.2	0.25	0.05	0.64	0.11	2.03	0.1	0.05	0.81	0.05	0	0	0.166667	0.926667	0.32	0.0166667	2.47508	0.248632	-4.26303	0.715195	-5.79701	0.0122736	0.941106	1	gi|656916713|gb|KEF62291.1|	hypothetical protein A1O9_00263 [Exophiala aquamarina CBS 119918]	cpw:CPC735_072500	SAM domain family protein	--	--	sp|P39969|BOI2_YEAST	Protein BOI2 OS=Saccharomyces cerevisiae (strain ATCC 204508 / S288c) GN=BOI2 PE=1 SV=1	--
Zoff052472	1	0	0	0	0	0	0	0	0	7	0	114	0.05	0	0	0	0	0	0	0	0	0.36	0	5.64	0.0166667	0.001	0.001	2	-4.05889	1	10.9658	0.0566976	10.9658	0.00825684	-4.05889	1	gi|635363826|emb|CCI47669.1|	unnamed protein product [Albugo candida]	--	--	--	--	--	--	--
Zoff052490	0	0	0	21	4	2	0	0	0	0	0	0	0	0	0	1.03	0.23	0.1	0	0	0	0	0	0	0.001	0.453333	0.001	0.001	8.82443	0.0281429	0	1	-8.82443	0.0398796	0	1	gi|504399152|ref|WP_014586254.1|	formate transporter [Methanosaeta harundinacea]	dat:HRM2_48440	fdhC; FdhC	--	--	sp|Q50568|FDHC_METTF	Probable formate transporter OS=Methanothermobacter thermautotrophicus GN=fdhC PE=3 SV=1	--
Zoff052495	1	0	0	6	1	74	2	0	5	2	0	1	0.05	0	0	0.3	0.06	3.67	0.1	0	0.25	0.1	0	0.05	0.0166667	1.34333	0.116667	0.05	6.33271	0.0106142	-1.22239	1	-4.74775	0.0485363	2.80735	1	gi|656913622|gb|KEF59202.1|	OPT family small oligopeptide transporter [Exophiala aquamarina CBS 119918]	ssl:SS1G_09370	hypothetical protein	SPAC29B12.10c	[T] KOG2262 Sexual differentiation process protein ISP4	sp|O14031|PGT1_SCHPO	Glutathione transporter 1 OS=Schizosaccharomyces pombe (strain 972 / ATCC 24843) GN=pgt1 PE=1 SV=1	GO:0055085,opt family small oligopeptide transporter; GO:0006367,opt family small oligopeptide transporter; GO:0043581,opt family small oligopeptide transporter; GO:0006857,opt family small oligopeptide transporter; GO:0003677,opt family small oligopeptide transporter; GO:0005887,opt family small oligopeptide transporter; GO:0015198,opt family small oligopeptide transporterGO:0032968,opt family s…
Zoff052548	65	55	42	159	46	310	21	11	190	1	3	2	3.2	2.76	2.07	7.83	2.64	15.38	1.06	0.54	9.57	0.05	0.16	0.1	2.67667	8.61667	3.72333	0.103333	1.68669	0.135337	-5.17122	0.0295134	-6.38175	1.96e-07	0.476157	1	gi|656910634|gb|KEF56293.1|	acyl-CoA dehydrogenase [Exophiala aquamarina CBS 119918]	cpw:CPC735_009150	short/branched chain specific acyl-CoA dehydrogenase, putative (EC:1.3.99.-); K00257 [EC:1.3.99.-]	CE09015	[I] KOG0139 Short-chain acyl-CoA dehydrogenase	sp|P45954|ACDSB_HUMAN	Short/branched chain specific acyl-CoA dehydrogenase, mitochondrial OS=Homo sapiens GN=ACADSB PE=1 SV=1	GO:0050660,acyl- dehydrogenase; GO:0003995,acyl- dehydrogenase; GO:0055114,acyl- dehydrogenase
Zoff052635	0	0	0	22	1	9	0	0	4	3	1	4	0	0	0	1.08	0.06	0.45	0	0	0.2	0.15	0.05	0.2	0.001	0.53	0.0666667	0.133333	9.04985	0.0169204	1	1	-1.99095	0.730387	6.05889	1	gi|471884394|emb|CCO33787.1|	hypothetical protein BN14_07873 [Rhizoctonia solani AG-1 IB]	lga:LGAS_1663	hypothetical protein	--	--	--	--	--
Zoff052636	0	0	0	18	3	2	0	0	2	2	3	1	0	0	0	0.89	0.17	0.1	0	0	0.1	0.1	0.16	0.05	0.001	0.386667	0.0333333	0.103333	8.59495	0.0483733	1.63227	1	-1.90378	0.827167	5.05889	1	gi|443923556|gb|ELU42763.1|	PHD domain-containing protein [Rhizoctonia solani AG-1 IA]	--	--	--	--	--	--	GO:0008270,set-domain and phd finger protein
Zoff052795	0	1	0	27	2	14	0	1	0	0	0	0	0	0.05	0	1.33	0.11	0.69	0	0.05	0	0	0	0	0.0166667	0.71	0.0166667	0.001	5.41278	0.00978335	-4.05889	1	-9.47168	0.00706976	0	1	gi|576986930|gb|EUC59666.1|	DNA polymerase type-B family catalytic domain protein [Rhizoctonia solani AG-3 Rhs1AP]	lbc:LACBIDRAFT_251819	hypothetical protein; K02327 DNA polymerase delta subunit 1 [EC:2.7.7.7]	SPBC336.04	[L] KOG0969 DNA polymerase delta, catalytic subunit	sp|P30316|DPOD_SCHPO	DNA polymerase delta catalytic subunit OS=Schizosaccharomyces pombe (strain 972 / ATCC 24843) GN=pol3 PE=1 SV=2	GO:0003887,delta dna polymerase; GO:0006260,delta dna polymerase; GO:0003677,delta dna polymerase; GO:0071897,delta dna polymerase; GO:0000166,delta dna polymerase
Zoff052812	0	0	0	0	0	0	0	0	0	4	0	42	0	0	0	0	0	0	0	0	0	0.2	0	2.08	0.001	0.001	0.001	0.76	0	1	9.56986	0.1735	9.56986	0.046189	0	1	gi|567994281|gb|ETL44441.1|	hypothetical protein L916_05272 [Phytophthora parasitica]	pif:PITG_16062	hypothetical protein; K03844 alpha-1,2-mannosyltransferase [EC:2.4.1.-]	7296469	[M] KOG1387 Glycosyltransferase	sp|Q3TZM9|ALG11_MOUSE	GDP-Man:Man(3)GlcNAc(2)-PP-Dol alpha-1,2-mannosyltransferase OS=Mus musculus GN=Alg11 PE=2 SV=1	GO:0009058,gdp-man:man c -pp-dol alpha- -mannosyltransferase isoform x1
Zoff052823	0	0	0	0	0	0	0	0	0	57.08	7	0	0	0	0	0	0	0	0	0	0	2.9	0.36	0	0.001	0.001	0.001	1.08667	0	1	10.0857	0.0924596	10.0857	0.018275	0	1	gi|646396130|gb|KDQ60440.1|	benzoquinone reductase [Jaapia argillacea MUCL 33604]	afv:AFLA_080630	NADH-quinone oxidoreductase Pst2, putative; K03809 Trp repressor binding protein	YDR032c	[R] KOG3135 1,4-benzoquinone reductase-like; Trp repressor binding protein-like/protoplast-secreted protein	sp|Q12335|PST2_YEAST	Protoplast secreted protein 2 OS=Saccharomyces cerevisiae (strain ATCC 204508 / S288c) GN=PST2 PE=1 SV=1	GO:0055114,nadh-quinone oxidoreductase; GO:0016491,nadh-quinone oxidoreductase; GO:0045892,nadh-quinone oxidoreductase; GO:0010181,nadh-quinone oxidoreductase
Zoff052839	335.31	270.63	261.58	388.17	445.72	196.27	83.59	135.57	609.62	26.95	87.1	113.16	16.5	13.56	12.91	19.1	25.6	9.74	4.23	6.71	30.7	1.37	4.5	5.59	14.3233	18.1467	13.88	3.82	0.341337	1	-1.86136	0.71362	-2.24806	0.0358285	-0.0453597	1	gi|413926514|gb|AFW66446.1|	ubiquitin2 [Zea mays]	cre:CHLREDRAFT_140045	UBQ1a, UBQ1b; bi-ubiquitin, major isoform; K08770 ubiquitin C	At4g05050	[OR] KOG0001 Ubiquitin and ubiquitin-like proteins	sp|P0CG83|UBIQP_HORVU	Polyubiquitin (Fragment) OS=Hordeum vulgare PE=2 SV=1	GO:0016192,polyubiquitin partial; GO:0005618,polyubiquitin partial; GO:0006511,polyubiquitin partial; GO:0006623,polyubiquitin partial; GO:0005730,polyubiquitin partial; GO:0005774,polyubiquitin partial
Zoff052898	55	214	58	336	242	34	48	31	51	13	7	0	2.71	10.72	2.86	16.54	13.9	1.69	2.43	1.54	2.57	0.66	0.36	0	5.43	10.71	2.18	0.34	0.979934	1	-2.68072	0.282709	-4.97728	0.000986021	-1.31662	1	gi|695031983|ref|XP_009403521.1|	PREDICTED: probable WRKY transcription factor 41 [Musa acuminata subsp. malaccensis]	--	--	--	--	--	--	--
Zoff052918	0	0	0	20	6	8	0	0	0	12	1	2	0	0	0	0.98	0.34	0.4	0	0	0	0.61	0.05	0.1	0.001	0.573333	0.001	0.253333	9.16323	0.0019302	7.98489	0.506394	-1.17834	1	0	1	gi|639568770|gb|KDN46208.1|	hypothetical protein RSAG8_04435, partial [Rhizoctonia solani AG-8 WAC10335]	cci:CC1G_09447	hypothetical protein	--	--	--	--	GO:0016021,transmembrane protein
Zoff052928	1	0	0	6	4	72	0	0	9	3	2	0	0.05	0	0	0.3	0.23	3.57	0	0	0.45	0.15	0.1	0	0.0166667	1.36667	0.15	0.0833333	6.35755	0.00301432	-0.847997	1	-4.03562	0.0534908	3.16993	1	gi|682462142|gb|KFZ18025.1|	hypothetical protein V501_01412 [Pseudogymnoascus pannorum VKM F-4519 (FW-2642)]	afv:AFLA_104590	hypothetical protein	--	--	--	--	--
Zoff052938	0	0	0	0	0	0	0	0	0	4	0	43	0	0	0	0	0	0	0	0	0	0.2	0	2.13	0.001	0.001	0.001	0.776667	0	1	9.60115	0.169092	9.60115	0.0460715	0	1	gi|695436168|ref|XP_009531903.1|	Ca2+-binding protein/EF-hand superfamily protein [Phytophthora sojae]	pif:PITG_13132	caltractin	Hs4757974	[ZD] KOG0028 Ca2+-binding protein (centrin/caltractin), EF-Hand superfamily protein	sp|Q06827|CATR_SCHDU	Caltractin OS=Scherffelia dubia PE=1 SV=1	GO:0005815,caltractin; GO:0007067,caltractin; GO:0003676,caltractin; GO:0005509,caltractin; GO:0008026,caltractin; GO:0006200,caltractin; GO:0051301,caltractinGO:0005524,caltractin
Zoff052942	0	37	8	0	0	0	0	0	17	55.93	184.38	75.24	0	1.85	0.39	0	0	0	0	0	0.86	2.84	9.53	3.72	0.746667	0.001	0.286667	5.36333	-9.54432	0.022786	4.22568	0.127772	12.3889	2.55e-09	-1.38109	1	gi|671175162|ref|XP_008728045.1|	formate dehydrogenase [Cladophialophora carrionii CBS 160.54]	nfi:NFIA_051470	NAD-dependent formate dehydrogenase AciA/Fdh; K00122 formate dehydrogenase [EC:1.2.1.2]	YOR388c	[C] KOG0069 Glyoxylate/hydroxypyruvate reductase (D-isomer-specific 2-hydroxy acid dehydrogenase superfamily)	sp|Q03134|FDH_EMENI	Probable formate dehydrogenase OS=Emericella nidulans (strain FGSC A4 / ATCC 38163 / CBS 112.46 / NRRL 194 / M139) GN=aciA PE=2 SV=3	GO:0051287,formate dehydrogenase; GO:0005576,formate dehydrogenase; GO:0005829,formate dehydrogenase; GO:0055114,formate dehydrogenase; GO:0016616,formate dehydrogenase
Zoff053049	0	0	0	0	0	0	0	0	0	6	0	46	0	0	0	0	0	0	0	0	0	0.3	0	2.27	0.001	0.001	0.001	0.856667	0	1	9.74259	0.131341	9.74259	0.0312314	0	1	gi|570967163|gb|ETP30282.1|	hypothetical protein F442_20693 [Phytophthora parasitica P10297]	pif:PITG_05244	hypothetical protein	Hs4826934	[T] KOG0211 Protein phosphatase 2A regulatory subunit A and related proteins	sp|Q8TF05|PP4R1_HUMAN	Serine/threonine-protein phosphatase 4 regulatory subunit 1 OS=Homo sapiens GN=PPP4R1 PE=1 SV=1	--
Zoff053092	1	0	0	3	0	65	0	0	1.86	0	0	0	0.05	0	0	0.15	0	3.23	0	0	0.09	0	0	0	0.0166667	1.12667	0.03	0.001	6.07895	0.0460233	-4.90689	1	-10.1378	0.0267359	0.847997	1	gi|628213693|ref|XP_007719189.1|	calcium/proton exchanger [Capronia coronata CBS 617.96]	cpw:CPC735_068980	calcium/proton exchanger family protein; K07300 Ca2+:H+ antiporter	YDL128w	[P] KOG1397 Ca2+/H+ antiporter VCX1 and related proteins	sp|Q99385|VCX1_YEAST	Vacuolar calcium ion transporter OS=Saccharomyces cerevisiae (strain ATCC 204508 / S288c) GN=VCX1 PE=1 SV=1	GO:0016021,calcium proton exchanger; GO:0052862,calcium proton exchanger; GO:0070588,calcium proton exchanger; GO:0016998,calcium proton exchanger; GO:0006364,calcium proton exchanger; GO:0052861,calcium proton exchanger; GO:0032040,calcium proton exchangerGO:0015369,calcium proton exchanger
Zoff053109	0	0	0	31	4	13	0	0	0	2	3	5	0	0	0	1.53	0.23	0.65	0	0	0	0.1	0.16	0.25	0.001	0.803333	0.001	0.17	9.64985	0.000702425	7.40939	0.646135	-2.24046	0.303384	0	1	gi|639568385|gb|KDN45776.1|	hypothetical protein RSAG8_04609, partial [Rhizoctonia solani AG-8 WAC10335]	cci:CC1G_10965	hypothetical protein; K03123 transcription initiation factor TFIIA small subunit	SPCC553.11c	[K] KOG3463 Transcription initiation factor IIA, gamma subunit	sp|P0CR84|T2AG_CRYNJ	Transcription initiation factor IIA subunit 2 OS=Cryptococcus neoformans var. neoformans serotype D (strain JEC21 / ATCC MYA-565) GN=TOA2 PE=3 SV=1	GO:0003743,transcription initiation factor iia gamma subunit; GO:0006413,transcription initiation factor iia gamma subunit; GO:0006367,transcription initiation factor iia gamma subunit; GO:0005672,transcription initiation factor iia gamma subunit; GO:0006355,transcription initiation factor iia gamma subunit
Zoff053123	65.6	29.58	57.7	22.8	14.66	27	228.09	33	94.65	388.51	101.73	186.63	3.23	1.48	2.85	1.12	0.84	1.34	11.53	1.63	4.77	19.71	5.26	9.23	2.52	1.1	5.97667	11.4	-1.19592	0.325362	0.931621	1	3.37346	0.000391015	1.24592	1	gi|695004741|ref|XP_009388790.1|	PREDICTED: non-specific lipid-transfer protein 2-like [Musa acuminata subsp. malaccensis]	vvi:100261140	hypothetical protein LOC100261140	--	--	sp|Q43681|NLTP_VIGUN	Probable non-specific lipid-transfer protein AKCS9 OS=Vigna unguiculata PE=2 SV=1	GO:0010363,non-specific lipid-transfer protein 2-like; GO:0009963,non-specific lipid-transfer protein 2-like; GO:0006612,non-specific lipid-transfer protein 2-like
Zoff053233	2	2.87	1.42	2.66	1	68.95	1.43	0	13.97	1	0	0	0.1	0.14	0.07	0.13	0.06	3.42	0.07	0	0.7	0.05	0	0	0.103333	1.20333	0.256667	0.0166667	3.54166	0.148793	-3.94486	1	-6.17393	0.0328188	1.31259	1	gi|656908453|gb|KEF54188.1|	hypothetical protein A1O9_09983 [Exophiala aquamarina CBS 119918]	afv:AFLA_027430	Rho guanyl nucleotide exchange factor, putative; K11236 cell division control protein 24	SPAC16E8.09	[T] KOG3519 Invasion-inducing protein TIAM1/CDC24 and related RhoGEF GTPases	sp|P40995|SCD1_SCHPO	Rho guanine nucleotide exchange factor scd1 OS=Schizosaccharomyces pombe (strain 972 / ATCC 24843) GN=scd1 PE=1 SV=2	GO:0051301,rho guanyl nucleotide exchange; GO:0005089,rho guanyl nucleotide exchange; GO:0032321,rho guanyl nucleotide exchange
Zoff053236	21.84	57.7	25.19	134.97	106.49	119.32	13.9	36.29	113.68	6.55	1	3	1.07	2.89	1.24	6.64	6.12	5.92	0.7	1.8	5.72	0.33	0.05	0.15	1.73333	6.22667	2.74	0.176667	1.84491	0.0158016	-3.95507	0.061681	-5.13936	1.16e-07	0.660627	1	gi|695071769|ref|XP_009382972.1|	PREDICTED: protein TIFY 10B-like [Musa acuminata subsp. malaccensis]	osa:4333065	Os03g0402800; K13464 jasmonate ZIM domain-containing protein	--	--	sp|Q9S7M2|TI10B_ARATH	Protein TIFY 10B OS=Arabidopsis thaliana GN=TIFY10B PE=1 SV=1	--
Zoff053239	30.16	96.52	42.89	193.67	126.09	176.36	40.9	50.59	115.74	5.45	9	8.7	1.48	4.84	2.12	9.53	7.24	8.75	2.07	2.51	5.83	0.28	0.47	0.43	2.81333	8.50667	3.47	0.393333	1.59631	0.0673246	-3.14111	0.0489216	-4.43477	1.23e-07	0.302655	1	gi|695071769|ref|XP_009382972.1|	PREDICTED: protein TIFY 10B-like [Musa acuminata subsp. malaccensis]	osa:4333065	Os03g0402800; K13464 jasmonate ZIM domain-containing protein	--	--	sp|Q9S7M2|TI10B_ARATH	Protein TIFY 10B OS=Arabidopsis thaliana GN=TIFY10B PE=1 SV=1	--
Zoff053248	1790	2443	1126	5166	4484	5688	2676	2341	1466	416	568	421	88.09	122.41	55.58	254.26	257.56	282.22	135.32	115.94	73.83	21.1	29.37	20.81	88.6933	264.68	108.363	23.76	1.57735	0.00758683	-2.18927	0.0861313	-3.47764	1.45e-07	0.288979	1	gi|695052809|ref|XP_009414477.1|	PREDICTED: lipase-like [Musa acuminata subsp. malaccensis]	sbi:SORBI_03g045220	hypothetical protein	At5g18640	[I] KOG4569 Predicted lipase	sp|P19515|LIP_RHIMI	Lipase OS=Rhizomucor miehei PE=1 SV=2	GO:0016787,lipase-like; GO:0006629,lipase-like
Zoff053276	0	0	1	64	4	10	0	0	0	7	4	2	0	0	0.05	3.15	0.23	0.5	0	0	0	0.36	0.21	0.1	0.0166667	1.29333	0.001	0.223333	6.27798	0.00150201	7.80305	0.443418	-2.53382	0.227041	-4.05889	1	gi|639572024|gb|KDN49426.1|	hypothetical protein RSAG8_02128, partial [Rhizoctonia solani AG-8 WAC10335]	scm:SCHCODRAFT_232559	hypothetical protein	Hs21314704	[R] KOG4682 Uncharacterized conserved protein, contains BTB/POZ domain	sp|O74778|BTB2_SCHPO	BTB/POZ domain-containing protein 2 OS=Schizosaccharomyces pombe (strain 972 / ATCC 24843) GN=btb2 PE=1 SV=1	--
Zoff053354	0	0	0	11	2	13	1	0	6	0	0	0	0	0	0	0.54	0.11	0.65	0.05	0	0.3	0	0	0	0.001	0.433333	0.116667	0.001	8.75933	0.0136858	-6.86625	1	-8.75933	0.0266737	6.86625	1	gi|628287087|ref|XP_007732786.1|	histone deacetylase HOS2 [Capronia epimyces CBS 606.96]	act:ACLA_090710	histone deacetylase HosA; K11483 histone deacetylase HOS2 [EC:3.5.1.98]	SPAC3G9.07c	[B] KOG1342 Histone deacetylase complex, catalytic component RPD3	sp|O13298|PHD1_SCHPO	Histone deacetylase phd1 OS=Schizosaccharomyces pombe (strain 972 / ATCC 24843) GN=phd1 PE=1 SV=1	GO:0070933,histone deacetylase; GO:0097372,histone deacetylase; GO:0006355,histone deacetylase; GO:0032041,histone deacetylase; GO:0070932,histone deacetylase; GO:0061647,histone deacetylase; GO:0046970,histone deacetylaseGO:0046969,histone deacetylaseGO:0008168,histone deacetylaseGO:0005634,histone deacetylase
Zoff053364	1725	2145	1406	637	705	681	1134.4	1038	1444	1060	815	1262	84.89	107.47	69.4	31.35	40.49	33.79	57.37	51.41	72.72	53.77	42.15	62.39	87.2533	35.21	60.5	52.77	-1.30923	0.0249232	-0.197217	1	0.583733	1	-0.528275	1	gi|657973801|ref|XP_008378713.1|	PREDICTED: cytochrome c [Malus domestica]	pop:POPTR_592347	hypothetical protein; K08738 cytochrome c	At1g22840	[C] KOG3453 Cytochrome c	sp|P00065|CYC_ARUMA	Cytochrome c OS=Arum maculatum PE=1 SV=1	GO:0005758,cytochrome c; GO:0070469,cytochrome c; GO:0009055,cytochrome c; GO:0005506,cytochrome c; GO:0020037,cytochrome c; GO:0055114,cytochrome c
Zoff053476	0	0	0	7	2	21.02	0	0	9	0	0	0	0	0	0	0.34	0.11	1.04	0	0	0.45	0	0	0	0.001	0.496667	0.15	0.001	8.95613	0.0133446	-7.22882	1	-8.95613	0.0247767	7.22882	1	gi|656917215|gb|KEF62793.1|	hypothetical protein A1O9_00766 [Exophiala aquamarina CBS 119918]	cpw:CPC735_001890	hypothetical protein; K12177 COP9 signalosome complex subunit 3	Hs4502975	[OT] KOG2582 COP9 signalosome, subunit CSN3	sp|Q5B0Y2|CSN3_EMENI	COP9 signalosome complex subunit 3 OS=Emericella nidulans (strain FGSC A4 / ATCC 38163 / CBS 112.46 / NRRL 194 / M139) GN=csnC PE=1 SV=2	--
Zoff053493	0	4	0	0	1	0	0	0	0	18	27	12	0	0.2	0	0	0.06	0	0	0	0	0.91	1.4	0.59	0.0666667	0.02	0.001	0.966667	-1.73697	1	9.91687	0.0124211	5.59495	0.000974807	-6.05889	1	gi|656914324|gb|KEF59904.1|	hypothetical protein A1O9_04752 [Exophiala aquamarina CBS 119918]	bfu:BC1G_08769	hypothetical protein	--	--	sp|O94440|YFE3_SCHPO	Uncharacterized protein C637.03 OS=Schizosaccharomyces pombe (strain 972 / ATCC 24843) GN=SPAC637.03 PE=4 SV=1	--
Zoff053536	0	0	0	14	3	5	0	2	0	13	6	10	0	0	0	0.69	0.17	0.25	0	0.1	0	0.66	0.31	0.49	0.001	0.37	0.0333333	0.486667	8.53138	0.026278	3.8679	0.315041	0.395409	1	5.05889	1	gi|576990659|gb|EUC63368.1|	peptidyl-prolyl cis-trans isomerase, cyclophilin-type protein [Rhizoctonia solani AG-3 Rhs1AP]	tva:TVAG_137880	cytosolic cyclophilin; K01802 peptidylprolyl isomerase [EC:5.2.1.8]	At2g21130	[O] KOG0865 Cyclophilin type peptidyl-prolyl cis-trans isomerase	sp|P35627|CYPX_USEUD	Peptidyl-prolyl cis-trans isomerase OS=Unspecified eudicot DB-1992 PE=2 SV=1	GO:0006457,peptidyl-prolyl cis-trans cyclophilin-type protein; GO:0000413,peptidyl-prolyl cis-trans cyclophilin-type protein; GO:0042277,peptidyl-prolyl cis-trans cyclophilin-type protein; GO:0005737,peptidyl-prolyl cis-trans cyclophilin-type protein; GO:0003755,peptidyl-prolyl cis-trans cyclophilin-type protein
Zoff053538	2	0	2	11	3	37	0	2	8	0	0	0	0.1	0	0.1	0.54	0.17	1.84	0	0.1	0.4	0	0	0	0.0666667	0.85	0.166667	0.001	3.67243	0.041277	-7.38082	1	-9.73132	0.0040595	1.32193	1	gi|684162525|ref|XP_009155140.1|	tRNA uridine 5-carboxymethylaminomethyl modification enzyme GidA [Exophiala dermatitidis NIH/UT8656]	bfu:BC1G_11669	hypothetical protein ; K03495 glucose inhibited division protein A	YGL236c	[J] KOG2311 NAD/FAD-utilizing protein possibly involved in translation	sp|P53070|MTO1_YEAST	Mitochondrial translation optimization protein 1 OS=Saccharomyces cerevisiae (strain ATCC 204508 / S288c) GN=MTO1 PE=1 SV=2	GO:0050660,trna uridine 5-carboxymethylaminomethyl modification enzyme; GO:0002098,trna uridine 5-carboxymethylaminomethyl modification enzyme
Zoff053558	0	0	1	8	2	116	2	0	11	1	0	0	0	0	0.05	0.39	0.11	5.76	0.1	0	0.55	0.05	0	0	0.0166667	2.08667	0.216667	0.0166667	6.96809	0.00272011	-3.70044	1	-6.96809	0.00523889	3.70044	1	gi|684158346|ref|XP_009153051.1|	hypothetical protein HMPREF1120_00801 [Exophiala dermatitidis NIH/UT8656]	ani:AN2140.2	hypothetical protein	7291065	[U] KOG1631 Translocon-associated complex TRAP, alpha subunit	sp|C5M501|IR222_CANTT	Increased recombination centers protein 22-2 OS=Candida tropicalis (strain ATCC MYA-3404 / T1) GN=IRC22-2 PE=3 SV=1	GO:0005789,signal sequence receptor alpha chain
Zoff053585	2	4	3	17	2	45	0	1	17	0	0	1	0.1	0.2	0.15	0.84	0.11	2.23	0	0.05	0.86	0	0	0.05	0.15	1.06	0.303333	0.0166667	2.82103	0.103916	-4.18587	1	-5.99095	0.00750761	1.01594	1	gi|656907938|gb|KEF53674.1|	hypothetical protein A1O9_10074 [Exophiala aquamarina CBS 119918]	afv:AFLA_111900	pitrilysin family metalloprotease (Cym1), putative; K06972	YDR430c	[RO] KOG2019 Metalloendoprotease HMP1 (insulinase superfamily)	sp|Q2UGN1|CYM1_ASPOR	Mitochondrial presequence protease OS=Aspergillus oryzae (strain ATCC 42149 / RIB 40) GN=cym1 PE=3 SV=1	GO:0046872,pitrilysin family metalloprotease; GO:0008237,pitrilysin family metalloprotease; GO:0006508,pitrilysin family metalloprotease
Zoff053607	8	16	13	55	101	30	11	38	19	13	34	6	0.39	0.8	0.64	2.71	5.8	1.49	0.56	1.88	0.96	0.66	1.76	0.3	0.61	3.33333	1.13333	0.906667	2.45008	0.00857639	-0.321928	1	-1.87832	0.273117	0.893691	1	gi|695081211|ref|XP_009388107.1|	PREDICTED: amino acid permease 3-like [Musa acuminata subsp. malaccensis]	sbi:SORBI_08g005000	hypothetical protein	At5g09220	[E] KOG1303 Amino acid transporters	sp|Q38967|AAP2_ARATH	Amino acid permease 2 OS=Arabidopsis thaliana GN=AAP2 PE=1 SV=1	GO:0016021,amino acid permease 3-like
Zoff053635	0	0	0	0	5	72	0	0	2	1	0	0	0	0	0	0	0.29	3.57	0	0	0.1	0.05	0	0	0.001	1.28667	0.0333333	0.0166667	10.3294	0.0104053	-1	1	-6.27053	0.0396547	5.05889	1	gi|656910807|gb|KEF56466.1|	dipeptidyl-peptidase III [Exophiala aquamarina CBS 119918]	cim:CIMG_04201	hypothetical protein; K01277 dipeptidyl-peptidase III [EC:3.4.14.4]	YOL057w	[R] KOG3675 Dipeptidyl peptidase III	sp|Q08225|DPP3_YEAST	Probable dipeptidyl peptidase 3 OS=Saccharomyces cerevisiae (strain ATCC 204508 / S288c) GN=YOL057W PE=1 SV=1	GO:0016021,dipeptidyl-peptidase iii; GO:0005737,dipeptidyl-peptidase iii; GO:0006508,dipeptidyl-peptidase iii; GO:0008239,dipeptidyl-peptidase iii; GO:0055085,dipeptidyl-peptidase iii
Zoff053720	84	213	80	606	677	479	58	95	98	8	25	23	4.13	10.67	3.95	29.83	38.89	23.77	2.93	4.71	4.94	0.41	1.29	1.14	6.25	30.83	4.19333	0.946667	2.30241	0.000957322	-2.14717	0.244377	-5.02533	3.92e-09	-0.575759	1	gi|695004605|ref|XP_009388718.1|	PREDICTED: auxin-responsive protein IAA17-like [Musa acuminata subsp. malaccensis]	vvi:100253148	hypothetical protein LOC100253148	--	--	sp|Q38826|IAA8_ARATH	Auxin-responsive protein IAA8 OS=Arabidopsis thaliana GN=IAA8 PE=1 SV=1	GO:0009734,auxin-responsive protein iaa17-like; GO:0006355,auxin-responsive protein iaa17-like; GO:0046983,auxin-responsive protein iaa17-like; GO:0005634,auxin-responsive protein iaa17-like
Zoff053753	3	0	2	9	2	41	0	0	8	0	0	0	0.15	0	0.1	0.44	0.11	2.03	0	0	0.4	0	0	0	0.0833333	0.86	0.133333	0.001	3.36737	0.106001	-7.05889	1	-9.74819	0.00651658	0.678072	1	gi|656906235|gb|KEF51979.1|	ATP phosphoribosyltransferase [Exophiala aquamarina CBS 119918]	aor:AOR_1_252174	AO090005000135; ATP phosphoribosyltransferase; K00765 ATP phosphoribosyltransferase [EC:2.4.2.17]	SPAC25G10.05c	[E] KOG2831 ATP phosphoribosyltransferase	sp|Q99145|HIS1_YARLI	ATP phosphoribosyltransferase OS=Yarrowia lipolytica (strain CLIB 122 / E 150) GN=HIS1 PE=3 SV=1	GO:0009113,atp phosphoribosyltransferase; GO:0000105,atp phosphoribosyltransferase; GO:0005524,atp phosphoribosyltransferase; GO:0003879,atp phosphoribosyltransferase; GO:0004637,atp phosphoribosyltransferase; GO:0000287,atp phosphoribosyltransferase; GO:0005737,atp phosphoribosyltransferase
Zoff053772	0	0	0	27	4	6	0	0	0	1	0	0	0	0	0	1.33	0.23	0.3	0	0	0	0.05	0	0	0.001	0.62	0.001	0.0166667	9.27612	0.00439549	4.05889	1	-5.21723	0.032734	0	1	gi|660961644|gb|KEP47731.1|	protoglobin protein [Rhizoctonia solani 123E]	tml:GSTUM_00006611001	hypothetical protein	--	--	--	--	GO:0020037,protoglobin protein; GO:0015671,protoglobin protein; GO:0005506,protoglobin protein; GO:0019825,protoglobin protein
Zoff053825	0	0	0	0	0	0	0	0	0	8	0	40	0	0	0	0	0	0	0	0	0	0.41	0	1.98	0.001	0.001	0.001	0.796667	0	1	9.63783	0.135698	9.63783	0.0299734	0	1	gi|675182901|ref|XP_008900335.1|	hypothetical protein, variant 1 [Phytophthora parasitica INRA-310]	pif:PITG_11782	calcium-binding protein, putative	Hs7706481	[S] KOG1566 Conserved protein Mo25	sp|Q9DB16|CB39L_MOUSE	Calcium-binding protein 39-like OS=Mus musculus GN=Cab39l PE=2 SV=3	--
Zoff053841	8.67	21	56	7	4	1.5	1	8	0	0	0.5	0	0.43	1.05	2.76	0.34	0.23	0.07	0.05	0.4	0	0	0.03	0	1.41333	0.213333	0.15	0.01	-2.72792	0.0423444	-3.90689	1	-4.41504	0.168091	-3.23607	0.358391	gi|494260677|ref|WP_007152278.1|	hypothetical protein [Marinobacter algicola]	--	--	--	--	--	--	--
Zoff053842	7	8	15	0	1	0	1	0	0	0	0	0	0.34	0.4	0.74	0	0.06	0	0.05	0	0	0	0	0	0.493333	0.02	0.0166667	0.001	-4.62449	0.0130437	-4.05889	1	-4.32193	1	-4.88753	0.229135	gi|695041159|ref|XP_009408181.1|	PREDICTED: butyrate--CoA ligase AAE11, peroxisomal-like [Musa acuminata subsp. malaccensis]	pop:POPTR_556023	ACLL8; acyl:coa ligase acetate-coa synthetase-like protein	At1g21540	[I] KOG1176 Acyl-CoA synthetase	sp|Q9LPK6|AEE9_ARATH	Probable acyl-activating enzyme 9 OS=Arabidopsis thaliana GN=AEE9 PE=2 SV=1	GO:0016874,butyrate-- ligase peroxisomal-like; GO:0008152,butyrate-- ligase peroxisomal-like
Zoff053891	4	1	1	3	3	3	0	6	5	192	2	2741	0.2	0.05	0.05	0.15	0.17	0.15	0	0.3	0.25	9.74	0.1	135.51	0.1	0.156667	0.183333	48.45	0.647698	1	8.04588	0.0216081	8.27265	0.000379363	0.874469	1	gi|301107834|ref|XP_002902999.1|	40S ribosomal protein S3-3 [Phytophthora infestans T30-4]	pif:PITG_08959	40S ribosomal protein S3-3; K02985 small subunit ribosomal protein S3e	At5g35530	[J] KOG3181 40S ribosomal protein S3	sp|Q9FJA6|RS33_ARATH	40S ribosomal protein S3-3 OS=Arabidopsis thaliana GN=RPS3C PE=1 SV=1	GO:0003735,40s ribosomal protein; GO:0003723,40s ribosomal protein; GO:0015935,40s ribosomal protein; GO:0006412,40s ribosomal protein
Zoff054027	1	8	4	1	14.5	46.31	1	40.33	35.01	0	0	1	0.05	0.4	0.2	0.05	0.83	2.3	0.05	2	1.76	0	0	0.05	0.216667	1.06	1.27	0.0166667	2.29052	0.435714	-6.25172	0.0538466	-5.99095	0.0142823	2.55128	0.844763	gi|672196633|ref|XP_008776853.1|	PREDICTED: uncharacterized protein LOC103696910 [Phoenix dactylifera]	ath:AT1G10020	hypothetical protein	--	--	--	--	GO:0005634,uncharacterized protein loc103715709
Zoff054028	5	9	21	10	56.71	227.69	1	47.67	59.99	2	0	2	0.25	0.45	1.04	0.49	3.26	11.3	0.05	2.36	3.02	0.1	0	0.1	0.58	5.01667	1.81	0.0666667	3.1126	0.0352297	-4.76288	0.0913675	-6.23362	0.000258083	1.64186	1	gi|672196633|ref|XP_008776853.1|	PREDICTED: uncharacterized protein LOC103696910 [Phoenix dactylifera]	ath:AT1G10020	hypothetical protein	--	--	--	--	GO:0005634,uncharacterized protein loc103990325
Zoff054054	0	7	1	12	3	53	2	2	10	0	2	0	0	0.35	0.05	0.59	0.17	2.63	0.1	0.1	0.5	0	0.1	0	0.133333	1.13	0.233333	0.0333333	3.08321	0.160214	-2.80735	1	-5.08321	0.0162673	0.807355	1	gi|628279722|ref|XP_007728328.1|	hypothetical protein A1O1_09282 [Capronia coronata CBS 617.96]	ang:ANI_1_866124	An14g06300; 50S ribosomal protein L4	SPBC2D10.08c	[J] KOG1624 Mitochondrial/chloroplast ribosomal protein L4	sp|O74801|RL4P_SCHPO	54S ribosomal protein yml6, mitochondrial OS=Schizosaccharomyces pombe (strain 972 / ATCC 24843) GN=yml6 PE=3 SV=1	--
Zoff054244	0	0	0	31	3	6	0	0	0	3	0	0	0	0	0	1.53	0.17	0.3	0	0	0	0.15	0	0	0.001	0.666667	0.001	0.05	9.38082	0.00573676	5.64386	1	-3.73697	0.158692	0	1	gi|639557701|gb|KDN35769.1|	hypothetical protein RSAG8_11331, partial [Rhizoctonia solani AG-8 WAC10335]	cci:CC1G_05133	rRNA binding protein; K14859 ribosome biogenesis protein SSF1/2	SPAC6B12.01	[J] KOG2963 RNA-binding protein required for 60S ribosomal subunit biogenesis	sp|O14206|YDD3_SCHPO	Brix domain-containing protein C1B9.03c OS=Schizosaccharomyces pombe (strain 972 / ATCC 24843) GN=SPAC1B9.03c PE=1 SV=2	GO:0016021,rrna binding protein; GO:0022891,rrna binding protein; GO:0055085,rrna binding protein
Zoff054297	0	0	0	3	1	32	1	1	3	1	0	0	0	0	0	0.15	0.06	1.59	0.05	0.05	0.15	0.05	0	0	0.001	0.6	0.0833333	0.0166667	9.22882	0.0302377	-2.32193	1	-5.16993	0.107461	6.38082	1	gi|628246716|ref|XP_007724555.1|	hypothetical protein A1O1_05479 [Capronia coronata CBS 617.96]	ure:UREG_06796	hypothetical protein	--	--	--	--	--
Zoff054311	0	0	0	36	4	9	0	0	0	3	0	1	0	0	0	1.77	0.23	0.45	0	0	0	0.15	0	0.05	0.001	0.816667	0.001	0.0666667	9.6736	0.00127044	6.05889	1	-3.61471	0.0836443	0	1	gi|639563745|gb|KDN41375.1|	hypothetical protein RSAG8_07490, partial [Rhizoctonia solani AG-8 WAC10335]	ppl:POSPLDRAFT_93009	hypothetical protein	--	--	--	--	--
Zoff054347	0	2	1	1	0	1	1	0	1	10	1	180	0	0.1	0.05	0.05	0	0.05	0.05	0	0.05	0.51	0.05	8.9	0.05	0.0333333	0.0333333	3.15333	-0.584963	1	6.56377	0.0538233	6.56377	0.00749609	-0.584963	1	gi|570983427|gb|ETP43255.1|	hypothetical protein F442_09932 [Phytophthora parasitica P10297]	pif:PITG_01208	trifunctional enzyme subunit beta, mitochondrial precursor; K07509 acetyl-CoA acyltransferase [EC:2.3.1.16]	Hs4504327	[I] KOG1392 Acetyl-CoA acetyltransferase	sp|Q99JY0|ECHB_MOUSE	Trifunctional enzyme subunit beta, mitochondrial OS=Mus musculus GN=Hadhb PE=1 SV=1	GO:0016747,trifunctional enzyme subunit mitochondrial precursor; GO:0008152,trifunctional enzyme subunit mitochondrial precursor
Zoff054348	4	0	2	14	3	43	2	3	15	0	0	0	0.2	0	0.1	0.69	0.17	2.13	0.1	0.15	0.76	0	0	0	0.1	0.996667	0.336667	0.001	3.31711	0.0632868	-8.39518	0.279138	-9.96097	0.00213788	1.75132	1	gi|684164413|ref|XP_009156082.1|	aconitate hydratase, mitochondrial [Exophiala dermatitidis NIH/UT8656]	nfi:NFIA_017880	aconitate hydratase, mitochondrial; K01681 aconitate hydratase 1 [EC:4.2.1.3]	YJL200c	[CE] KOG0453 Aconitase/homoaconitase (aconitase superfamily)	sp|Q4WJ90|ACON2_ASPFU	Putative aconitate hydratase, mitochondrial OS=Neosartorya fumigata (strain ATCC MYA-4609 / Af293 / CBS 101355 / FGSC A1100) GN=acoB PE=2 SV=1	GO:0003994,aconitate mitochondrial; GO:0006099,aconitate mitochondrial; GO:0051539,aconitate mitochondrial
Zoff054357	0	1	0	21	2	7	0	0	0	21	9	12	0	0.05	0	1.03	0.11	0.35	0	0	0	1.07	0.47	0.59	0.0166667	0.496667	0.001	0.71	4.89724	0.0418015	9.47168	0.0334918	0.515541	1	-4.05889	1	gi|576991638|gb|EUC64340.1|	60s ribosomal protein L27 [Rhizoctonia solani AG-3 Rhs1AP]	cci:CC1G_09504	60s ribosomal protein l27; K02901 large subunit ribosomal protein L27e	SPBC685.07c	[J] KOG3418 60S ribosomal protein L27	sp|O14388|RL27A_SCHPO	60S ribosomal protein L27-A OS=Schizosaccharomyces pombe (strain 972 / ATCC 24843) GN=rpl27a PE=2 SV=2	GO:0005840,60s ribosomal protein l27; GO:0003735,60s ribosomal protein l27; GO:0006412,60s ribosomal protein l27
Zoff054483	2	2	1	2	1	1	3	2	2	119	1	1566	0.1	0.1	0.05	0.1	0.06	0.05	0.15	0.1	0.1	6.04	0.05	77.42	0.0833333	0.07	0.116667	27.8367	-0.251539	1	7.89845	0.0147859	8.63542	0.000449054	0.485427	1	gi|673039703|ref|XP_008873812.1|	40S ribosomal protein S13 [Aphanomyces invadans]	pif:PITG_20264	40S ribosomal protein S13; K02953 small subunit ribosomal protein S13e	At4g00100	[J] KOG0400 40S ribosomal protein S13	sp|P62302|RS13_SOYBN	40S ribosomal protein S13 OS=Glycine max GN=RPS13 PE=2 SV=1	GO:0005840,40s ribosomal protein s13; GO:0003735,40s ribosomal protein s13; GO:0006412,40s ribosomal protein s13
Zoff054568	0	0	0	4	1	72	0	0	9	0	0	0	0	0	0	0.2	0.06	3.57	0	0	0.45	0	0	0	0.001	1.27667	0.15	0.001	10.3182	0.00527444	-7.22882	1	-10.3182	0.00888823	7.22882	1	gi|317151277|ref|XP_001824549.2|	SAM dependent methyltransferase [Aspergillus oryzae RIB40]	aor:AOR_1_350084	AO090020000195; SAM dependent methyltransferase	--	--	--	--	--
Zoff054572	0	1	0	9	6	47	0	0	2	0	0	0	0	0.05	0	0.44	0.34	2.33	0	0	0.1	0	0	0	0.0166667	1.03667	0.0333333	0.001	5.95884	0.00139782	-5.05889	1	-10.0177	0.00146637	1	1	gi|656909312|gb|KEF55008.1|	hypothetical protein A1O9_08660 [Exophiala aquamarina CBS 119918]	cim:CIMG_00196	hypothetical protein	SPBC17F3.01c	[TZ] KOG2710 Rho GTPase-activating protein	sp|O74335|RGA5_SCHPO	Rho-GTPase-activating protein 5 OS=Schizosaccharomyces pombe (strain 972 / ATCC 24843) GN=rga5 PE=3 SV=2	GO:0005622,rho gtpase activator; GO:0007165,rho gtpase activator
Zoff054573	0	0	0	0	0	0	0	1	1	5	0	68	0	0	0	0	0	0	0	0.05	0.05	0.25	0	3.36	0.001	0.001	0.0333333	1.20333	0	1	5.17393	0.220741	10.2328	0.0187967	5.05889	1	gi|675186887|ref|XP_008902328.1|	hypothetical protein PPTG_09204 [Phytophthora parasitica INRA-310]	pif:PITG_17490	Mitochondrial Carrier (MC) Family; K15084 solute carrier family 25 (mitochondrial carrier protein), member 16	At3g55640	[C] KOG0752 Mitochondrial solute carrier protein	sp|Q54MZ4|MCFB_DICDI	Mitochondrial substrate carrier family protein B OS=Dictyostelium discoideum GN=mcfB PE=3 SV=1	GO:0055085,mitochondrial substrate carrier family protein b-like; GO:0043229,mitochondrial substrate carrier family protein b-like; GO:1901363,mitochondrial substrate carrier family protein b-like; GO:0016021,mitochondrial substrate carrier family protein b-like; GO:0097159,mitochondrial substrate carrier family protein b-like
Zoff054638	0	0	0	0	0	0	0	0	1	2	0	115	0	0	0	0	0	0	0	0	0.05	0.1	0	5.69	0.001	0.001	0.0166667	1.93	0	1	6.85549	0.145766	10.9144	0.0169198	4.05889	1	gi|675178473|ref|XP_008898121.1|	S-formylglutathione hydrolase [Phytophthora parasitica INRA-310]	pif:PITG_06891	S-formylglutathione hydrolase, putative; K01070 S-formylglutathione hydrolase [EC:3.1.2.12]	Hs20547663	[R] KOG3101 Esterase D	sp|Q08E20|ESTD_BOVIN	S-formylglutathione hydrolase OS=Bos taurus GN=ESD PE=2 SV=1	GO:0031982,s-formylglutathione hydrolase; GO:0018738,s-formylglutathione hydrolase; GO:0043231,s-formylglutathione hydrolase; GO:0044444,s-formylglutathione hydrolase; GO:0046294,s-formylglutathione hydrolase
Zoff054641	4	23	6	18	27	10	5	3	6	1	1	3	0.2	1.15	0.3	0.89	1.55	0.5	0.25	0.15	0.3	0.05	0.05	0.15	0.55	0.98	0.233333	0.0833333	0.83335	1	-1.48543	1	-3.55582	0.0175422	-1.23704	1	gi|671169010|ref|XP_008724971.1|	hypothetical protein G647_02400 [Cladophialophora carrionii CBS 160.54]	cim:CIMG_02871	hypothetical protein	At3g60450	[G] KOG3734 Predicted phosphoglycerate mutase	--	--	--
Zoff054667	4	1	1	4	4	54	0	0	12	0	1	1	0.2	0.05	0.05	0.2	0.23	2.68	0	0	0.6	0	0.05	0.05	0.1	1.03667	0.2	0.0333333	3.37388	0.105587	-2.58496	1	-4.95884	0.0266676	1	1	gi|628276510|ref|XP_007731682.1|	hypothetical protein A1O3_03354 [Capronia epimyces CBS 606.96]	cim:CIMG_10032	similar to expression library immunization antigen 1	--	--	sp|Q4WCX9|YA280_ASPFU	Uncharacterized protein AFUA_6G02800 OS=Neosartorya fumigata (strain ATCC MYA-4609 / Af293 / CBS 101355 / FGSC A1100) GN=AFUA_6G02800 PE=1 SV=1	GO:0009277,gpi anchored protein
Zoff054795	0	0	0	27	2	11	0	0	0	1	2	2	0	0	0	1.33	0.11	0.55	0	0	0	0.05	0.1	0.1	0.001	0.663333	0.001	0.0833333	9.37359	0.00434121	6.38082	1	-2.99277	0.18586	0	1	gi|576985003|gb|EUC57746.1|	HLH domain protein, putative [Rhizoctonia solani AG-3 Rhs1AP]	cci:CC1G_00308	hypothetical protein	SPBC947.11c	[L] KOG1968 Replication factor C, subunit RFC1 (large subunit)	sp|O43086|ELG1_SCHPO	Telomere length regulation protein elg1 OS=Schizosaccharomyces pombe (strain 972 / ATCC 24843) GN=elg1 PE=1 SV=1	--
Zoff054881	1	0	1	14	6	14	0	5	0	0	0	0	0.05	0	0.05	0.69	0.34	0.69	0	0.25	0	0	0	0	0.0333333	0.573333	0.0833333	0.001	4.10434	0.0113048	-6.38082	1	-9.16323	0.00438169	1.32193	1	gi|470399609|ref|XP_004335426.1|	cathepsin L, putative [Acanthamoeba castellanii str. Neff]	dvi:Dvir_GJ14012	GJ14012 gene product from transcript GJ14012-RA	At5g60360	[O] KOG1543 Cysteine proteinase Cathepsin L	sp|Q86GF7|CRUST_PANBO	Crustapain OS=Pandalus borealis GN=Cys PE=1 SV=1	GO:0044707,cathepsin l; GO:0043170,cathepsin l; GO:0009056,cathepsin l; GO:0008233,cathepsin l
Zoff054952	20.7	17	3	43.89	18	364.27	8	4	80.71	0	4	0.5	1.02	0.85	0.15	2.16	1.03	18.07	0.4	0.2	4.06	0	0.21	0.02	0.673333	7.08667	1.55333	0.0766667	3.39571	0.030585	-4.34062	0.192358	-6.53036	0.00042973	1.20597	1	gi|628329732|ref|XP_007744145.1|	elongation factor 1-beta [Cladophialophora psammophila CBS 110553]	act:ACLA_024360	eukaryotic translation elongation factor 1 subunit Eef1-beta, putative; K03232 elongation factor 1-beta	SPCC1450.04	[K] KOG1668 Elongation factor 1 beta/delta chain	sp|P30151|EF1B_XENLA	Elongation factor 1-beta OS=Xenopus laevis GN=eef1b PE=1 SV=3	GO:0003746,elongation factor 1-beta; GO:0005853,elongation factor 1-beta; GO:0006414,elongation factor 1-beta
Zoff054953	2.3	0	3	35.11	0	27.73	0	0	32.29	0	0	0.5	0.11	0	0.15	1.73	0	1.38	0	0	1.63	0	0	0.02	0.0866667	1.03667	0.543333	0.00666667	3.58033	0.106036	-6.34873	0.497551	-7.28077	0.00834662	2.64829	1	gi|628329732|ref|XP_007744145.1|	elongation factor 1-beta [Cladophialophora psammophila CBS 110553]	act:ACLA_024360	eukaryotic translation elongation factor 1 subunit Eef1-beta, putative; K03232 elongation factor 1-beta	SPCC1450.04	[K] KOG1668 Elongation factor 1 beta/delta chain	sp|P30151|EF1B_XENLA	Elongation factor 1-beta OS=Xenopus laevis GN=eef1b PE=1 SV=3	GO:0003746,elongation factor 1-beta; GO:0005853,elongation factor 1-beta; GO:0006414,elongation factor 1-beta
Zoff054968	0	0	0	0	0	79.96	0	0	0	0	0	0	0	0	0	0	0	3.97	0	0	0	0	0	0	0.001	1.32333	0.001	0.001	10.37	0.0482109	0	1	-10.37	0.0610517	0	1	gi|656917805|gb|KEF63383.1|	hypothetical protein A1O9_01360 [Exophiala aquamarina CBS 119918]	uma:UM01171.1	hypothetical protein	At1g20510	[I] KOG1176 Acyl-CoA synthetase	sp|Q54P78|4CL2_DICDI	Probable 4-coumarate--CoA ligase 2 OS=Dictyostelium discoideum GN=4cl2 PE=3 SV=1	GO:0008152,phenylacetyl- ligase; GO:0003824,phenylacetyl- ligase
Zoff054980	2	3	1	11	3	154	2	0	52	2	1	0	0.1	0.15	0.05	0.54	0.17	7.64	0.1	0	2.62	0.1	0.05	0	0.1	2.78333	0.906667	0.05	4.79874	0.00999467	-4.18057	0.536755	-5.79874	0.00688257	3.18057	1	gi|684168864|ref|XP_009158303.1|	ATP synthase subunit D, mitochondrial [Exophiala dermatitidis NIH/UT8656]	pcs:Pc20g13280	Pc20g13280; K02138 F-type H+-transporting ATPase subunit d [EC:3.6.3.14]	YKL016c	[C] KOG3366 Mitochondrial F1F0-ATP synthase, subunit d/ATP7	sp|P0C2C8|ATP7_ASPTN	ATP synthase subunit d, mitochondrial OS=Aspergillus terreus (strain NIH 2624 / FGSC A1156) GN=atp7 PE=3 SV=1	GO:0015078,atp synthase subunit mitochondrial; GO:0000276,atp synthase subunit mitochondrial; GO:0015986,atp synthase subunit mitochondrial
Zoff055173	0	0	0	0	0	0	0	0	0	13	0	56	0	0	0	0	0	0	0	0	0	0.66	0	2.77	0.001	0.001	0.001	1.14333	0	1	10.159	0.0713574	10.159	0.0116589	0	1	gi|570968010|gb|ETP31129.1|	pyruvate dehydrogenase complex dihydrolipoamide acetyltransferase [Phytophthora parasitica P10297]	pif:PITG_06108	dihydrolipoyllysine-residue acetyltransferase component of pyruvate dehydrogenase complex, putative; K00627 pyruvate dehydrogenase E2 component (dihydrolipoamide acetyltransferase) [EC:2.3.1.12]	At3g52200	[C] KOG0557 Dihydrolipoamide acetyltransferase	sp|Q0WQF7|ODP21_ARATH	Dihydrolipoyllysine-residue acetyltransferase component 1 of pyruvate dehydrogenase complex, mitochondrial OS=Arabidopsis thaliana GN=LTA3 PE=2 SV=2	GO:0016746,pyruvate dehydrogenase complex dihydrolipoamide acetyltransferase; GO:0008152,pyruvate dehydrogenase complex dihydrolipoamide acetyltransferase
Zoff055228	0	0	0	12	2	6	0	0	1	0	0	0	0	0	0	0.59	0.11	0.3	0	0	0.05	0	0	0	0.001	0.333333	0.0166667	0.001	8.38082	0.0399292	-4.05889	1	-8.38082	0.0551914	4.05889	1	gi|576982176|gb|EUC54919.1|	YSH1-component of pre-mRNA polyadenylation factor PF I, related protein [Rhizoctonia solani AG-3 Rhs1AP]	cci:CC1G_03293	mRNA 3'-end-processing protein YSH1; K14403 cleavage and polyadenylation specificity factor subunit 3 [EC:3.1.27.-]	SPAC17G6.16c	[A] KOG1137 mRNA cleavage and polyadenylation factor II complex, BRR5 (CPSF subunit)	sp|Q4PEJ3|YSH1_USTMA	Endoribonuclease YSH1 OS=Ustilago maydis (strain 521 / FGSC 9021) GN=YSH1 PE=3 SV=1	--
Zoff055236	0	0	0	5	2	14	3	0	0	0	0	4	0	0	0	0.25	0.11	0.69	0.15	0	0	0	0	0.2	0.001	0.35	0.05	0.0666667	8.45121	0.0411721	0.415037	1	-2.39232	0.747623	5.64386	1	gi|281204491|gb|EFA78686.1|	protein kinase 2 [Polysphondylium pallidum PN500]	ddi:DDB_G0290157	pkgB; SGK family protein kinase; K08282 non-specific serine/threonine protein kinase [EC:2.7.11.1]	YKL126w	[RT] KOG0598 Ribosomal protein S6 kinase and related proteins	sp|P28178|PK2_DICDI	Protein kinase 2 OS=Dictyostelium discoideum GN=pkgB PE=1 SV=2	GO:0006468,protein kinase 2; GO:0005524,protein kinase 2; GO:0004674,protein kinase 2
Zoff055242	2	2	0	0	0	4	1261	4	6	2	2	0	0.1	0.1	0	0	0	0.2	63.77	0.2	0.3	0.1	0.1	0	0.0666667	0.0666667	21.4233	0.0666667	0	1	-8.328	0.0290504	0	1	8.328	0.0560911	gi|587685696|gb|EWZ32301.1|	murein transglycosylase [Fusarium oxysporum Fo47]	fgr:FG03632.1	hypothetical protein	--	--	sp|Q5BCX8|EGLD_EMENI	Endo-beta-1,4-glucanase D OS=Emericella nidulans (strain FGSC A4 / ATCC 38163 / CBS 112.46 / NRRL 194 / M139) GN=eglD PE=1 SV=1	--
Zoff055283	1	5	1	8	1	33	1	0	2	0	0	0	0.05	0.25	0.05	0.39	0.06	1.64	0.05	0	0.1	0	0	0	0.116667	0.696667	0.05	0.001	2.57808	0.399738	-5.64386	1	-9.44432	0.0172299	-1.22239	1	gi|684173125|ref|XP_009160431.1|	FACT complex subunit pob3 [Exophiala dermatitidis NIH/UT8656]	afm:AFUA_7G05360	structure-specific recognition protein; K09272 structure-specific recognition protein 1	SPBC609.05	[KLB] KOG0526 Nucleosome-binding factor SPN, POB3 subunit	sp|Q4WGK6|POB3_ASPFU	FACT complex subunit pob3 OS=Neosartorya fumigata (strain ATCC MYA-4609 / Af293 / CBS 101355 / FGSC A1100) GN=pob3 PE=3 SV=2	GO:0006281,fact complex subunit pob3; GO:0006260,fact complex subunit pob3; GO:0006355,fact complex subunit pob3; GO:0003677,fact complex subunit pob3; GO:0005694,fact complex subunit pob3; GO:0005634,fact complex subunit pob3
Zoff055348	0	0	0	0	1	0	0	0	0	13	0	174	0	0	0	0	0.06	0	0	0	0	0.66	0	8.6	0.001	0.02	0.001	3.08667	4.32193	1	11.5918	0.0381551	7.26991	0.00997531	0	1	gi|675193189|ref|XP_008905479.1|	AGC/AKT protein kinase [Phytophthora parasitica INRA-310]	pif:PITG_06776	RAC family serine/threonine-protein kinase	Hs4502023	[T] KOG0690 Serine/threonine protein kinase	sp|P54644|KRAC_DICDI	RAC family serine/threonine-protein kinase homolog OS=Dictyostelium discoideum GN=pkbA PE=1 SV=1	GO:0016787,agc akt protein kinase; GO:0006468,agc akt protein kinase; GO:0005524,agc akt protein kinase; GO:0008270,agc akt protein kinase; GO:0004674,agc akt protein kinase
Zoff055370	11	42	33	21	7	52	1420.51	11	125	1725.61	47	2970.43	0.54	2.1	1.63	1.03	0.4	2.58	71.83	0.54	6.29	87.54	2.43	146.85	1.42333	1.33667	26.22	78.94	-0.0906338	1	1.59009	1	5.88404	0.000291024	4.20332	0.218761	gi|409900249|gb|AFV46358.1|	pathogenesis-related protein 5, partial [Curcuma longa]	vvi:100244461	hypothetical protein	--	--	sp|P33679|ZEAM_MAIZE	Zeamatin OS=Zea mays GN=Zlp PE=1 SV=2	--
Zoff055434	2	1	1	6	2	30	2	0	3	0	0	0	0.1	0.05	0.05	0.3	0.11	1.49	0.1	0	0.15	0	0	0	0.0666667	0.633333	0.0833333	0.001	3.24793	0.137265	-6.38082	1	-9.30682	0.0172646	0.321928	1	gi|656905708|gb|KEF51455.1|	hypothetical protein A1O9_12372 [Exophiala aquamarina CBS 119918]	aor:AOR_1_992134	AO090102000596; hypothetical protein	--	--	sp|Q9UTF8|UGO1_SCHPO	Mitochondrial fusion and transport protein ugo1 OS=Schizosaccharomyces pombe (strain 972 / ATCC 24843) GN=ugo1 PE=3 SV=1	GO:0016021,mitochondrial fusion protein
Zoff055471	0	0	0	46	1	13	1	0	1	4	1	3	0	0	0	2.26	0.06	0.65	0.05	0	0.05	0.2	0.05	0.15	0.001	0.99	0.0333333	0.133333	9.95128	0.00250483	2	1	-2.89239	0.23072	5.05889	1	gi|471908014|emb|CCO28402.1|	protein disulfide-isomerase [Rhizoctonia solani AG-1 IB]	scm:SCHCODRAFT_81742	hypothetical protein; K09584 protein disulfide-isomerase A6 [EC:5.3.4.1]	SPAC13F5.05	[O] KOG0191 Thioredoxin/protein disulfide isomerase	sp|Q869Z0|Y5025_DICDI	Putative protein disulfide-isomerase DDB_G0275025 OS=Dictyostelium discoideum GN=DDB_G0275025 PE=1 SV=1	GO:0045454,thioredoxin-like protein
Zoff055531	4	0	0	11	5	56.84	1	0	1.74	0	0	1	0.2	0	0	0.54	0.29	2.82	0.05	0	0.09	0	0	0.05	0.0666667	1.21667	0.0466667	0.0166667	4.18982	0.0206428	-1.48543	1	-6.18982	0.00343465	-0.514573	1	gi|656907349|gb|KEF53088.1|	transcription initiation factor TFIID/TFIIF subunit [Exophiala aquamarina CBS 119918]	ani:AN0083.2	hypothetical protein; K03140 transcription initiation factor TFIID/TFIIF subunit	SPAC22H12.02	[K] KOG3149 Transcription initiation factor IIF, auxiliary subunit	sp|O94436|TAF14_SCHPO	Transcription initiation factor TFIID subunit 14 OS=Schizosaccharomyces pombe (strain 972 / ATCC 24843) GN=tfg3 PE=1 SV=1	GO:0003743,transcription initiation factor tfiid tfiif subunit; GO:0006413,transcription initiation factor tfiid tfiif subunit; GO:0006355,transcription initiation factor tfiid tfiif subunit; GO:0005634,transcription initiation factor tfiid tfiif subunit
Zoff055538	0	0	0	5	1	34	2	0	7	0	0	0	0	0	0	0.25	0.06	1.69	0.1	0	0.35	0	0	0	0.001	0.666667	0.15	0.001	9.38082	0.0167122	-7.22882	1	-9.38082	0.02582	7.22882	1	gi|656916642|gb|KEF62220.1|	hypothetical protein A1O9_00192 [Exophiala aquamarina CBS 119918]	cpw:CPC735_021260	hypothetical protein	--	--	--	--	--
Zoff055620	157	58	190	9	16	5	14	5	12	10	13	28	7.73	2.91	9.38	0.44	0.92	0.25	0.71	0.25	0.6	0.51	0.67	1.38	6.67333	0.536667	0.52	0.853333	-3.63631	1.35e-05	0.714598	1	0.669083	1	-3.68182	0.00723409	gi|695044908|ref|XP_009410227.1|	PREDICTED: uncharacterized protein LOC103992305 [Musa acuminata subsp. malaccensis]	vvi:100266954	hypothetical protein LOC100266954; K14488 SAUR family protein	--	--	sp|P32295|ARG7_VIGRR	Indole-3-acetic acid-induced protein ARG7 OS=Vigna radiata var. radiata GN=ARG7 PE=2 SV=1	--
Zoff055641	0	0	0	0	0	0	0	0	0	7	0	34	0	0	0	0	0	0	0	0	0	0.36	0	1.68	0.001	0.001	0.001	0.68	0	1	9.40939	0.173541	9.40939	0.0430227	0	1	gi|675179659|ref|XP_008898714.1|	hypothetical protein PPTG_06534 [Phytophthora parasitica INRA-310]	pif:PITG_03822	hypothetical protein	--	--	--	--	--
Zoff055688	0	0	0	0	0	0	0	0	0	9	0	54	0	0	0	0	0	0	0	0	0	0.46	0	2.67	0.001	0.001	0.001	1.04333	0	1	10.027	0.090299	10.027	0.0174102	0	1	gi|567961623|gb|ETK87163.1|	hypothetical protein L915_08351 [Phytophthora parasitica]	pif:PITG_10140	Mitochondrial Carrier (MC) Family	At3g05290	[C] KOG0769 Predicted mitochondrial carrier protein	sp|B6ZJZ9|PNC1_SOYBN	Peroxisomal adenine nucleotide carrier 1 OS=Glycine max GN=PNC1 PE=2 SV=1	GO:0016021,mitochondrial carrier family; GO:0006810,mitochondrial carrier family
Zoff055810	0	0	0	15	1	6	0	1	1	8	0	2	0	0	0	0.74	0.06	0.3	0	0.05	0.05	0.41	0	0.1	0.001	0.366667	0.0333333	0.17	8.51833	0.0494117	2.3505	1	-1.10893	1	5.05889	1	gi|576983721|gb|EUC56464.1|	Serine/Threonine-kinase TNNI3K [Rhizoctonia solani AG-3 Rhs1AP]	scm:SCHCODRAFT_232455	hypothetical protein	Hs20428652	[T] KOG0197 Tyrosine kinases	sp|P06239|LCK_HUMAN	Tyrosine-protein kinase Lck OS=Homo sapiens GN=LCK PE=1 SV=6	GO:0004672,tyrosine kinase catalytic domain protein; GO:0006468,tyrosine kinase catalytic domain protein; GO:0005524,tyrosine kinase catalytic domain protein
Zoff055836	0	0	0	4	5	47	1	1	2	0	0	0	0	0	0	0.2	0.29	2.33	0.05	0.05	0.1	0	0	0	0.001	0.94	0.0666667	0.001	9.87652	0.00221846	-6.05889	1	-9.87652	0.00545461	6.05889	1	gi|656907940|gb|KEF53676.1|	hypothetical protein A1O9_10076 [Exophiala aquamarina CBS 119918]	bfu:BC1G_00408	hypothetical protein ; K08773 RalA-binding protein 1	SPAC26A3.09	[T] KOG4269 Rac GTPase-activating protein BCR/ABR	sp|Q74ZH7|BEM3_ASHGO	GTPase-activating protein BEM3 OS=Ashbya gossypii (strain ATCC 10895 / CBS 109.51 / FGSC 9923 / NRRL Y-1056) GN=BEM3 PE=3 SV=2	GO:0044763,rho gtpase activator; GO:0050794,rho gtpase activator
Zoff055879	0	0	1	0	0	0	0	0	0	5	0	65	0	0	0.05	0	0	0	0	0	0	0.25	0	3.21	0.0166667	0.001	0.001	1.15333	-4.05889	1	10.1716	0.0967705	10.1716	0.0204181	-4.05889	1	gi|570327869|gb|ETO75817.1|	hypothetical protein F444_08671 [Phytophthora parasitica P1976]	pif:PITG_02016	integrator complex subunit, putative	--	--	--	--	--
Zoff055993	2	2	0	5	4	16	0	1	4.91	0	0	0	0.1	0.1	0	0.25	0.23	0.79	0	0.05	0.25	0	0	0	0.0666667	0.423333	0.1	0.001	2.66676	0.298999	-6.64386	1	-8.72565	0.0249764	0.584963	1	gi|628218247|ref|XP_007719914.1|	hypothetical protein A1O1_00808 [Capronia coronata CBS 617.96]	afv:AFLA_103880	nuclear envelope pore membrane protein, putative	--	--	sp|O94385|PO152_SCHPO	Nucleoporin pom152 OS=Schizosaccharomyces pombe (strain 972 / ATCC 24843) GN=pom152 PE=3 SV=3	--
Zoff056032	1	0	0	9	8	41	3	1	9	1	0	0	0.05	0	0	0.44	0.46	2.03	0.15	0.05	0.45	0.05	0	0	0.0166667	0.976667	0.216667	0.0166667	5.87283	0.000919285	-3.70044	0.967899	-5.87283	0.00398342	3.70044	1	gi|628239045|ref|XP_007723261.1|	hypothetical protein A1O1_04174 [Capronia coronata CBS 617.96]	cim:CIMG_02635	hypothetical protein	SPAC29B12.05c	[R] KOG2904 Predicted methyltransferase	sp|O14028|MTQ1_SCHPO	Probable mitochondrial N(5)-glutamine methyltransferase mtq1 OS=Schizosaccharomyces pombe (strain 972 / ATCC 24843) GN=mtq1 PE=3 SV=1	--
Zoff056065	3	1	2	3	0	6	2	9	25	33	39	29	0.15	0.05	0.1	0.15	0	0.3	0.1	0.45	1.26	1.67	2.02	1.43	0.1	0.15	0.603333	1.70667	0.584963	1	1.50015	1	3.50815	0.00359373	2.59296	0.931602	gi|672137592|ref|XP_008792524.1|	PREDICTED: NAC transcription factor 29-like [Phoenix dactylifera]	osa:4332717	Os03g0327800	--	--	sp|O49255|NAC29_ARATH	NAC transcription factor 29 OS=Arabidopsis thaliana GN=NAC029 PE=2 SV=1	GO:0006355,nac transcription factor 25-like; GO:0003677,nac transcription factor 25-like
Zoff056067	0	0	0	0	0	0	0	0	1	5	0	46	0	0	0	0	0	0	0	0	0.05	0.25	0	2.27	0.001	0.001	0.0166667	0.84	0	1	5.65535	0.263856	9.71425	0.0363144	4.05889	1	gi|675164001|ref|XP_008890885.1|	hypothetical protein PPTG_01037 [Phytophthora parasitica INRA-310]	pif:PITG_01878	hypothetical protein	--	--	--	--	--
Zoff056096	0	0	0	0	0	0	0	0	0	7	0	32	0	0	0	0	0	0	0	0	0	0.36	0	1.58	0.001	0.001	0.001	0.646667	0	1	9.33688	0.185112	9.33688	0.0480617	0	1	gi|566033092|gb|ETI56003.1|	hypothetical protein F443_01375 [Phytophthora parasitica P1569]	pif:PITG_02001	hypothetical protein	YMR178w	[EH] KOG2644 3'-phosphoadenosine 5'-phosphosulfate sulfotransferase (PAPS reductase)/FAD synthetase and related enzymes	sp|Q8R123|FAD1_MOUSE	FAD synthase OS=Mus musculus GN=Flad1 PE=1 SV=1	--
Zoff056103	0	2	2	9	2	23	0	0	1	0	0	0	0	0.1	0.1	0.44	0.11	1.14	0	0	0.05	0	0	0	0.0666667	0.563333	0.0166667	0.001	3.07895	0.159762	-4.05889	1	-9.13785	0.0162735	-2	1	gi|628293729|ref|XP_007757463.1|	hypothetical protein A1O7_05263 [Cladophialophora yegresii CBS 114405]	afm:AFUA_1G07490	microtubule binding protein HOOK3	--	--	sp|Q86VS8|HOOK3_HUMAN	Protein Hook homolog 3 OS=Homo sapiens GN=HOOK3 PE=1 SV=2	--
Zoff056104	0	0	0	61	9	16	0	0	1	13	4	20	0	0	0	3	0.52	0.79	0	0	0.05	0.66	0.21	0.99	0.001	1.43667	0.0166667	0.62	10.4885	1.02e-05	5.21723	0.120497	-1.21239	0.933389	4.05889	1	gi|576994545|gb|EUC67140.1|	integral membrane protein [Rhizoctonia solani AG-3 Rhs1AP]	scm:SCHCODRAFT_74465	hypothetical protein	Hs8923524	[R] KOG3912 Predicted integral membrane protein	sp|Q8N357|S35F6_HUMAN	Solute carrier family 35 member F6 OS=Homo sapiens GN=SLC35F6 PE=1 SV=1	GO:0000139,integral membrane protein; GO:0005351,integral membrane protein; GO:0008643,integral membrane protein; GO:0015992,integral membrane protein; GO:0016021,integral membrane protein
Zoff056142	2	5	6	1	4	3	1	3	3	178	0	2393	0.1	0.25	0.3	0.05	0.23	0.15	0.05	0.15	0.15	9.03	0	118.31	0.216667	0.143333	0.116667	42.4467	-0.596103	1	8.50712	0.0195843	8.21013	0.00203864	-0.893085	1	gi|325184307|emb|CCA18798.1|	Ribosomal protein S23 putative [Albugo laibachii Nc14]	tps:THAPSDRAFT_28209	RS23; RS23, ribosomal protein 23 40S small ribosomal subunit; K02973 small subunit ribosomal protein S23e	YPR132w	[J] KOG1749 40S ribosomal protein S23	sp|Q86FP7|RS23_DERVA	40S ribosomal protein S23 OS=Dermacentor variabilis GN=RpS23 PE=2 SV=1	GO:0003735,40s ribosomal protein s23; GO:0015935,40s ribosomal protein s23; GO:0006412,40s ribosomal protein s23
Zoff056165	0	1	0	3	2	41	1	0	10	0	0	0	0	0.05	0	0.15	0.11	2.03	0.05	0	0.5	0	0	0	0.0166667	0.763333	0.183333	0.001	5.51728	0.0352317	-7.51833	1	-9.57617	0.0185331	3.45943	1	gi|656913143|gb|KEF58725.1|	hypothetical protein A1O9_06651 [Exophiala aquamarina CBS 119918]	afv:AFLA_051230	protein transport protein Sec39, putative	--	--	sp|O14266|SEC39_SCHPO	Protein transport protein sec39 OS=Schizosaccharomyces pombe (strain 972 / ATCC 24843) GN=sec39 PE=3 SV=1	--
Zoff056186	0	0	0	16	1	10	0	0	0	1	0	1	0	0	0	0.79	0.06	0.5	0	0	0	0.05	0	0.05	0.001	0.45	0.001	0.0333333	8.81378	0.0220937	5.05889	1	-3.75489	0.189528	0	1	gi|443923835|gb|ELU42974.1|	mRNA export factor elf1 [Rhizoctonia solani AG-1 IA]	cci:CC1G_01993	mRNA export factor elf1; K03235 elongation factor 3	SPAC3C7.08c_1	[J] KOG1242 Protein containing adaptin N-terminal region	sp|O14134|ELF1_SCHPO	mRNA export factor elf1 OS=Schizosaccharomyces pombe (strain 972 / ATCC 24843) GN=elf1 PE=1 SV=1	GO:0006200,mrna export factor elf1; GO:0005524,mrna export factor elf1; GO:0016887,mrna export factor elf1; GO:0005634,mrna export factor elf1
Zoff056485	0	0	0	3	1	31	0	0	2	0	1	1	0	0	0	0.15	0.06	1.54	0	0	0.1	0	0.05	0.05	0.001	0.583333	0.0333333	0.0333333	9.18818	0.0320874	0	1	-4.12928	0.182956	5.05889	1	gi|628250488|ref|XP_007728711.1|	hypothetical protein A1O3_00371 [Capronia epimyces CBS 606.96]	ang:ANI_1_842084	An09g06460; hypothetical protein	--	--	sp|O13771|YE99_SCHPO	Uncharacterized protein C17A5.09c OS=Schizosaccharomyces pombe (strain 972 / ATCC 24843) GN=SPAC17A5.09c PE=1 SV=1	GO:0004864,protein phosphatase inhibitor 2 (ipp-2); GO:0043666,protein phosphatase inhibitor 2 (ipp-2); GO:0009966,protein phosphatase inhibitor 2 (ipp-2); GO:0043086,protein phosphatase inhibitor 2 (ipp-2)
Zoff056609	0	0	0	37	4	5	0	2	1	1	1	1	0	0	0	1.82	0.23	0.25	0	0.1	0.05	0.05	0.05	0.05	0.001	0.766667	0.05	0.05	9.58246	0.00369492	0	1	-3.9386	0.0644029	5.64386	1	gi|660967589|gb|KEP51825.1|	hemolysin-III-like protein [Rhizoctonia solani 123E]	ppl:POSPLDRAFT_127104	hypothetical G-protein coupled receptor	SPAC30D11.11	[RT] KOG0748 Predicted membrane proteins, contain hemolysin III domain	sp|Q09910|YAJB_SCHPO	Uncharacterized protein C30D11.11 OS=Schizosaccharomyces pombe (strain 972 / ATCC 24843) GN=SPAC30D11.11 PE=4 SV=1	GO:0016021,#NAME?
Zoff056669	1	0	0	0	0	0	0	0	0	16	0	131	0.05	0	0	0	0	0	0	0	0	0.81	0	6.48	0.0166667	0.001	0.001	2.43	-4.05889	1	11.2467	0.0394076	11.2467	0.0040818	-4.05889	1	gi|301113492|ref|XP_002998516.1|	conserved hypothetical protein [Phytophthora infestans T30-4]	pif:PITG_06385	hypothetical protein	At2g42210	[U] KOG3225 Mitochondrial import inner membrane translocase, subunit TIM22	sp|O48528|OP163_ARATH	Outer envelope pore protein 16-3, chloroplastic/mitochondrial OS=Arabidopsis thaliana GN=OEP163 PE=1 SV=1	GO:0016021,outer envelope pore protein 16- chloroplastic mitochondrial; GO:0043231,outer envelope pore protein 16- chloroplastic mitochondrial; GO:0031967,outer envelope pore protein 16- chloroplastic mitochondrial; GO:0044444,outer envelope pore protein 16- chloroplastic mitochondrial; GO:0031090,outer envelope pore protein 16- chloroplastic mitochondrial
Zoff056720	34	39	56	101	76	85	88	29	38	3	18	4	1.67	1.95	2.76	4.97	4.37	4.22	4.45	1.44	1.91	0.15	0.93	0.2	2.12667	4.52	2.6	0.426667	1.08773	0.244421	-2.60733	0.249694	-3.40514	0.00172236	0.289918	1	gi|695077102|ref|XP_009385873.1|	PREDICTED: growth-regulating factor 5-like isoform X1 [Musa acuminata subsp. malaccensis]	rcu:RCOM_1328100	hypothetical protein	--	--	sp|Q6AWY4|GRF5_ORYSJ	Growth-regulating factor 5 OS=Oryza sativa subsp. japonica GN=GRF5 PE=2 SV=1	--
Zoff056729	0	0	0	18	6	8	0	0	0	1	0.5	0	0	0	0	0.89	0.34	0.4	0	0	0	0.05	0.03	0	0.001	0.543333	0.001	0.0266667	9.08569	0.00226927	4.73697	1	-4.34873	0.0210733	0	1	gi|443924551|gb|ELU43550.1|	hypothetical protein AG1IA_02411 [Rhizoctonia solani AG-1 IA]	scm:SCHCODRAFT_108083	hypothetical protein	--	--	--	--	--
Zoff056798	1	0	0	6	1	69	0	0	2	1	0	1	0.05	0	0	0.3	0.06	3.42	0	0	0.1	0.05	0	0.05	0.0166667	1.26	0.0333333	0.0333333	6.24031	0.0113904	0	1	-5.24031	0.030676	1	1	gi|656918095|gb|KEF63673.1|	ATPase [Exophiala aquamarina CBS 119918]	cpw:CPC735_030840	ABC transporter domain containing protein	CE20234	[IR] KOG0059 Lipid exporter ABCA1 and related proteins, ABC superfamily	sp|Q8T6J5|ABCA2_DICDI	ABC transporter A family member 2 OS=Dictyostelium discoideum GN=abcA2 PE=3 SV=1	GO:0016301,abc transporter; GO:0006351,abc transporter; GO:0016310,abc transporter; GO:0044424,abc transporter; GO:0006790,abc transporter; GO:0016887,abc transporter; GO:0006200,abc transporterGO:0005524,abc transporterGO:0042254,abc transporter
Zoff056820	0	0	0	57	9	15	0	2	0	2	1	7	0	0	0	2.81	0.52	0.74	0	0.1	0	0.1	0.05	0.35	0.001	1.35667	0.0333333	0.166667	10.4059	1.43e-05	2.32193	1	-3.02503	0.0630099	5.05889	1	gi|471914716|emb|CCO26659.1|	hypothetical protein BN14_00688 [Rhizoctonia solani AG-1 IB]	cci:CC1G_01730	hypothetical protein	Hs8923892	[R] KOG1944 Peroxisomal membrane protein MPV17 and related proteins	sp|Q2KIY1|PXMP2_BOVIN	Peroxisomal membrane protein 2 OS=Bos taurus GN=PXMP2 PE=2 SV=3	GO:0016021,integral membrane mpv17 pmp23 family protein
Zoff056951	0	0	1	37	2	7	0	0	1	0	1	2	0	0	0.05	1.82	0.11	0.35	0	0	0.05	0	0.05	0.1	0.0166667	0.76	0.0166667	0.05	5.51096	0.0171989	1.58496	1	-3.926	0.096593	0	1	gi|443924587|gb|ELU43585.1|	cytochrome c heme lyase [Rhizoctonia solani AG-1 IA]	cci:CC1G_00860	cytochrome c heme lyase; K01764 cytochrome c heme-lyase [EC:4.4.1.17]	YAL039c	[CO] KOG3996 Holocytochrome c synthase/heme-lyase	sp|P06182|CCHL_YEAST	Cytochrome c heme lyase OS=Saccharomyces cerevisiae (strain ATCC 204508 / S288c) GN=CYC3 PE=1 SV=1	--
Zoff056985	0	0	0	2	4	62	2	1	3	0	1	0	0	0	0	0.1	0.23	3.08	0.1	0.05	0.15	0	0.05	0	0.001	1.13667	0.1	0.0166667	10.1506	0.00413421	-2.58496	1	-6.0917	0.0209463	6.64386	1	gi|628271477|ref|XP_007730997.1|	UMF1 family MFS transporter [Capronia epimyces CBS 606.96]	pcs:Pc21g11290	Pc21g11290; K06902 MFS transporter, UMF1 family	--	--	sp|A7KAM9|AT221_PENCW	Autophagy-related protein 22-1 OS=Penicillium chrysogenum (strain ATCC 28089 / DSM 1075 / Wisconsin 54-1255) GN=atg22-1 PE=3 SV=1	GO:0005773,umf1 family mfs transporter; GO:0006810,umf1 family mfs transporter; GO:0016020,umf1 family mfs transporter
Zoff057092	1	0	1	5	2	20	0	0	0	0	0	0	0.05	0	0.05	0.25	0.11	0.99	0	0	0	0	0	0	0.0333333	0.45	0.001	0.001	3.75489	0.133147	0	1	-8.81378	0.0375786	-5.05889	1	gi|656909718|gb|KEF55396.1|	hypothetical protein A1O9_08146 [Exophiala aquamarina CBS 119918]	ssl:SS1G_10324	hypothetical protein	--	--	sp|P39529|YJU6_YEAST	Putative transcriptional regulatory protein YJL206C OS=Saccharomyces cerevisiae (strain ATCC 204508 / S288c) GN=YJL206C PE=2 SV=1	GO:0006357,transcription factor cys6; GO:0008270,transcription factor cys6; GO:0000981,transcription factor cys6; GO:0003677,transcription factor cys6; GO:0005634,transcription factor cys6
Zoff057148	0	6	2	5	2	113	0	0	3	2	0	0	0	0.3	0.1	0.25	0.11	5.61	0	0	0.15	0.1	0	0	0.133333	1.99	0.05	0.0333333	3.89966	0.110216	-0.584963	1	-5.89966	0.0178472	-1.41504	1	gi|656918228|gb|KEF63806.1|	hypothetical protein A1O9_01784 [Exophiala aquamarina CBS 119918]	afm:AFUA_1G05320	disulfide isomerase; K09584 protein disulfide-isomerase A6 [EC:5.3.4.1]	YOR288c	[O] KOG0191 Thioredoxin/protein disulfide isomerase	sp|Q869Z0|Y5025_DICDI	Putative protein disulfide-isomerase DDB_G0275025 OS=Dictyostelium discoideum GN=DDB_G0275025 PE=1 SV=1	GO:0045454,disulfide isomerase; GO:0008152,disulfide isomerase; GO:0016853,disulfide isomerase
Zoff057167	0	0	0	22	1	5	0	0	1	2	2	3	0	0	0	1.08	0.06	0.25	0	0	0.05	0.1	0.1	0.15	0.001	0.463333	0.0166667	0.116667	8.85591	0.0358498	2.80735	1	-1.98966	0.787704	4.05889	1	gi|443925871|gb|ELU44631.1|	Bestrophin domain-containing protein [Rhizoctonia solani AG-1 IA]	lbc:LACBIDRAFT_315976	hypothetical protein	--	--	--	--	--
Zoff057225	0	3	0	11	0	41	0	1	6	0	0	0	0	0.15	0	0.54	0	2.03	0	0.05	0.3	0	0	0	0.05	0.856667	0.116667	0.001	4.09873	0.148769	-6.86625	1	-9.74259	0.0213221	1.22239	1	gi|656914385|gb|KEF59965.1|	CMGC/CDK/CDC2 protein kinase [Exophiala aquamarina CBS 119918]	ure:UREG_01100	cell division control protein 2; K04563 cyclin-dependent kinase [EC:2.7.11.22]	YBR160w	[R] KOG0594 Protein kinase PCTAIRE and related kinases	sp|P54119|CDK1_AJECA	Cyclin-dependent kinase 1 OS=Ajellomyces capsulatus GN=CDC2 PE=3 SV=1	GO:0007067,cmgc cdk cdc2 protein kinase; GO:0019220,cmgc cdk cdc2 protein kinase; GO:0004693,cmgc cdk cdc2 protein kinase; GO:0075306,cmgc cdk cdc2 protein kinase; GO:0045931,cmgc cdk cdc2 protein kinase; GO:0043942,cmgc cdk cdc2 protein kinase; GO:0071482,cmgc cdk cdc2 protein kinaseGO:0005829,cmgc cdk cdc2 protein kinaseGO:0006468,cmgc cdk cdc2 protein kinaseGO:0010914,cmgc cdk cdc2 protein kin…
Zoff057337	0	0	0	18	1	5	0	0	0	0	0	0	0	0	0	0.89	0.06	0.25	0	0	0	0	0	0	0.001	0.4	0.001	0.001	8.64386	0.0456326	0	1	-8.64386	0.067875	0	1	gi|660965722|gb|KEP50398.1|	calcium/proton exchanger [Rhizoctonia solani 123E]	scm:SCHCODRAFT_255205	hypothetical protein; K12619 5'-3' exoribonuclease 2 [EC:3.1.13.-]	SPCC1795.02c	[P] KOG1397 Ca2+/H+ antiporter VCX1 and related proteins	sp|O59768|VCX1_SCHPO	Vacuolar calcium ion transporter OS=Schizosaccharomyces pombe (strain 972 / ATCC 24843) GN=vcx1 PE=3 SV=1	GO:0009987,vacuolar calcium ion transporter ame: full=vacuolar ca(2+) h(+) exchanger; GO:0044765,vacuolar calcium ion transporter ame: full=vacuolar ca(2+) h(+) exchanger
Zoff057345	0	4	3	14	18	11	6	1	8	0	0	0	0	0.2	0.15	0.69	1.03	0.55	0.3	0.05	0.4	0	0	0	0.116667	0.756667	0.25	0.001	2.69727	0.0558048	-7.96578	0.412228	-9.56351	0.00102688	1.09954	1	gi|656916891|gb|KEF62469.1|	hypothetical protein A1O9_00441 [Exophiala aquamarina CBS 119918]	afm:AFUA_3G01840	MFS transporter	SPCC757.13	[G] KOG2533 Permease of the major facilitator superfamily	sp|B5BP49|YP55_SCHPO	Uncharacterized transporter C460.05 OS=Schizosaccharomyces pombe (strain 972 / ATCC 24843) GN=SPBC460.05 PE=3 SV=1	GO:0055085,mfs transporter; GO:0016021,mfs transporter
Zoff057352	1	0	0	32	2	6	0	0	1	4	0	7	0.05	0	0	1.57	0.11	0.3	0	0	0.05	0.2	0	0.35	0.0166667	0.66	0.0166667	0.183333	5.30743	0.0275213	3.45943	1	-1.848	0.887582	0	1	gi|443916730|gb|ELU37694.1|	iron ion transporter [Rhizoctonia solani AG-1 IA]	cci:CC1G_06839	mitochondrial iron ion transporter	YPL224c	[P] KOG1485 Mitochondrial Fe2+ transporter MMT1 and related transporters (cation diffusion facilitator superfamily)	sp|Q08970|MMT2_YEAST	Mitochondrial metal transporter 2 OS=Saccharomyces cerevisiae (strain ATCC 204508 / S288c) GN=MMT2 PE=3 SV=2	GO:0016021,iron ion transporter; GO:0098655,iron ion transporter; GO:0008324,iron ion transporter
Zoff057367	1	0	2	8	0	31	0	0	5	0	0	0	0.05	0	0.1	0.39	0	1.54	0	0	0.25	0	0	0	0.05	0.643333	0.0833333	0.001	3.68557	0.209917	-6.38082	1	-9.32942	0.0431985	0.736966	1	gi|656914513|gb|KEF60093.1|	hypothetical protein A1O9_04943, partial [Exophiala aquamarina CBS 119918]	pcs:Pc12g10260	Pc12g10260	--	--	--	--	--
Zoff057462	0	0	0	0	0	0	0	0	2	13	14	6	0	0	0	0	0	0	0	0	0.1	0.66	0.72	0.3	0.001	0.001	0.0333333	0.56	0	1	4.07039	0.243204	9.12928	0.00562729	5.05889	1	gi|684164273|ref|XP_009156012.1|	hypothetical protein HMPREF1120_03683 [Exophiala dermatitidis NIH/UT8656]	mgr:MGG_00777	MG00777.4; hypothetical protein	--	--	sp|P16965|STF2_YEAST	ATPase-stabilizing factor 15 kDa protein OS=Saccharomyces cerevisiae (strain ATCC 204508 / S288c) GN=STF2 PE=1 SV=2	--
Zoff057478	0	0	0	0	0	0	0	0	0	1.91	0	74.98	0	0	0	0	0	0	0	0	0	0.1	0	3.71	0.001	0.001	0.001	1.27	0	1	10.3106	0.115667	10.3106	0.0289014	0	1	gi|675179571|ref|XP_008898670.1|	hypothetical protein PPTG_06495 [Phytophthora parasitica INRA-310]	pif:PITG_08693	hook domain-containing protein	7292323	[S] KOG4643 Uncharacterized coiled-coil protein	sp|Q86VS8|HOOK3_HUMAN	Protein Hook homolog 3 OS=Homo sapiens GN=HOOK3 PE=1 SV=2	GO:0009987,hook domain-containing protein; GO:0043229,hook domain-containing protein; GO:0044699,hook domain-containing protein; GO:0051641,hook domain-containing protein
Zoff057522	0	1	1	5	6	28	0	0	6	0	0	0	0	0.05	0.05	0.25	0.34	1.39	0	0	0.3	0	0	0	0.0333333	0.66	0.1	0.001	4.30743	0.0239387	-6.64386	1	-9.36632	0.00753647	1.58496	1	gi|628223099|ref|XP_007720730.1|	hypothetical protein A1O1_01627 [Capronia coronata CBS 617.96]	ani:AN1402.2	hypothetical protein	YJL218w	[E] KOG4750 Serine O-acetyltransferase	sp|P40892|YJV8_YEAST	Putative acetyltransferase YJL218W OS=Saccharomyces cerevisiae (strain ATCC 204508 / S288c) GN=YJL218W PE=1 SV=1	GO:0006357,c6 zinc finger domain-containing protein; GO:0008270,c6 zinc finger domain-containing protein; GO:0000981,c6 zinc finger domain-containing protein; GO:0016407,c6 zinc finger domain-containing protein; GO:0005634,c6 zinc finger domain-containing protein
Zoff057549	3	36	3	23	13	12	6	0	1	1	0	1	0.15	1.8	0.15	1.13	0.75	0.6	0.3	0	0.05	0.05	0	0.05	0.7	0.826667	0.116667	0.0333333	0.239951	1	-1.80735	1	-4.63227	0.00526458	-2.58496	1	gi|695065169|ref|XP_009421168.1|	PREDICTED: GDP-L-galactose phosphorylase 1-like [Musa acuminata subsp. malaccensis]	pop:POPTR_642193	hypothetical protein; K14190 GDP-L-galactose phosphorylase [EC:2.7.7.69]	At5g55120	[R] KOG2720 Predicted hydrolase (HIT family)	sp|Q8RWE8|GGAP1_ARATH	GDP-L-galactose phosphorylase 1 OS=Arabidopsis thaliana GN=VTC2 PE=1 SV=1	GO:0008152,gdp-l-galactose phosphorylase 1-like; GO:0080048,gdp-l-galactose phosphorylase 1-like; GO:0016779,gdp-l-galactose phosphorylase 1-like
Zoff057604	0	0	0	65	10	13	0	0	1	6	1	2	0	0	0	3.2	0.57	0.65	0	0	0.05	0.3	0.05	0.1	0.001	1.47333	0.0166667	0.15	10.5249	1.47e-05	3.16993	1	-3.29605	0.038405	4.05889	1	gi|639556940|gb|KDN35125.1|	hypothetical protein RSAG8_11858, partial [Rhizoctonia solani AG-8 WAC10335]	lbc:LACBIDRAFT_291858	hypothetical protein; K11290 template-activating factor I	Hs4506891	[L] KOG1508 DNA replication factor/protein phosphatase inhibitor SET/SPR-2	sp|Q01105|SET_HUMAN	Protein SET OS=Homo sapiens GN=SET PE=1 SV=3	GO:0006334,nucleosome assembly protein; GO:0005634,nucleosome assembly protein
Zoff057660	38	64	38	44	27	40	5	21	99	1	1	0	1.87	3.21	1.88	2.17	1.55	1.98	0.25	1.04	4.99	0.05	0.05	0	2.32	1.9	2.09333	0.0333333	-0.288125	1	-5.97269	0.0270304	-5.83289	5.51e-06	-0.148323	1	gi|695021023|ref|XP_009397586.1|	PREDICTED: uncharacterized protein LOC103982392 [Musa acuminata subsp. malaccensis]	vvi:100242760	hypothetical protein LOC100242760	--	--	sp|Q337C0|U496D_ORYSJ	UPF0496 protein 4 OS=Oryza sativa subsp. japonica GN=Os10g0513300 PE=2 SV=1	--
Zoff057804	0	0	0	6	1	78	1	0	12	1	0	0	0	0	0	0.3	0.06	3.87	0.05	0	0.6	0.05	0	0	0.001	1.41	0.216667	0.0166667	10.4615	0.00313228	-3.70044	1	-6.40259	0.0153168	7.75933	1	gi|628297090|ref|XP_007739370.1|	hypothetical protein A1O5_00561 [Cladophialophora psammophila CBS 110553]	afv:AFLA_111290	hypothetical protein	--	--	--	--	--
Zoff057811	0	0	0	31	2	6	0	0	1	5	5	8	0	0	0	1.53	0.11	0.3	0	0	0.05	0.25	0.26	0.4	0.001	0.646667	0.0166667	0.303333	9.33688	0.00901328	4.18587	0.44375	-1.09212	1	4.05889	1	gi|576994533|gb|EUC67128.1|	mRNA cap guanine-N7 methyltransferase [Rhizoctonia solani AG-3 Rhs1AP]	cci:CC1G_03838	mRNA capping methyltransferase; K00565 mRNA (guanine-N7-)-methyltransferase [EC:2.1.1.56]	SPCC330.10	[A] KOG1975 mRNA cap methyltransferase	sp|P0CO65|MCES_CRYNB	mRNA cap guanine-N7 methyltransferase OS=Cryptococcus neoformans var. neoformans serotype D (strain B-3501A) GN=ABD1 PE=3 SV=1	GO:0016740,guanine-n -methyltransferase; GO:0006396,guanine-n -methyltransferase
Zoff057894	0	1	2	1	1	3	0	0	2	15	1	803	0	0.05	0.1	0.05	0.06	0.15	0	0	0.1	0.76	0.05	39.7	0.05	0.0866667	0.0333333	13.5033	0.793549	1	8.66213	0.0317718	7.28362	0.00442562	-0.584963	1	gi|695437563|ref|XP_009532248.1|	hypothetical protein PHYSODRAFT_562896 [Phytophthora sojae]	pif:PITG_12526	hypothetical protein	--	--	sp|Q8IDX6|RBP2A_PLAF7	Reticulocyte-binding protein 2 homolog a OS=Plasmodium falciparum (isolate 3D7) GN=PF13_0198 PE=3 SV=1	--
Zoff057955	0	2	1	0	0	0	0	3	1	19	3	957	0	0.1	0.05	0	0	0	0	0.15	0.05	0.96	0.16	47.31	0.05	0.001	0.0666667	16.1433	-5.64386	1	7.91976	0.0254621	13.9787	0.000241366	0.415037	1	gi|675184885|ref|XP_008901327.1|	4-aminobutyrate transaminase [Phytophthora parasitica INRA-310]	pif:PITG_00623	4-aminobutyrate aminotransferase, putative; K00823 4-aminobutyrate aminotransferase [EC:2.6.1.19]	At1g80600	[E] KOG1401 Acetylornithine aminotransferase	sp|Q9I6M4|DAVT_PSEAE	5-aminovalerate aminotransferase DavT OS=Pseudomonas aeruginosa (strain ATCC 15692 / PAO1 / 1C / PRS 101 / LMG 12228) GN=davT PE=1 SV=1	GO:0008152,4-aminobutyrate aminotransferase; GO:0030170,4-aminobutyrate aminotransferase; GO:0008483,4-aminobutyrate aminotransferase
Zoff057976	236	378	134	261	190	246	828	632	465	7	9	20	11.61	18.94	6.61	12.85	10.91	12.21	41.87	31.3	23.42	0.36	0.47	0.99	12.3867	11.99	32.1967	0.606667	-0.0469563	1	-5.72986	3.33e-06	-4.30478	4.33e-07	1.37812	0.803081	gi|596169931|ref|XP_007223059.1|	hypothetical protein PRUPE_ppa006982mg [Prunus persica]	vvi:100262106	hypothetical protein LOC100262106; K14664 IAA-amino acid hydrolase [EC:3.5.1.-]	--	--	sp|Q8VYX0|ILL6_ARATH	IAA-amino acid hydrolase ILR1-like 6 OS=Arabidopsis thaliana GN=ILL6 PE=2 SV=2	GO:0016787,iaa-amino acid hydrolase ilr1-like 1; GO:0008152,iaa-amino acid hydrolase ilr1-like 1
Zoff057977	0	1	0	1	1	1	2	0	0	15	1	962	0	0.05	0	0.05	0.06	0.05	0.1	0	0	0.76	0.05	47.56	0.0166667	0.0533333	0.0333333	16.1233	1.67807	1	8.91797	0.0299598	8.2399	0.00197036	1	1	gi|695433469|ref|XP_009531184.1|	hypothetical protein PHYSODRAFT_316790 [Phytophthora sojae]	pif:PITG_09649	hypothetical protein	--	--	--	--	--
Zoff058075	0	0	0	30	2	11	0	1	0	5	0	2	0	0	0	1.48	0.11	0.55	0	0.05	0	0.25	0	0.1	0.001	0.713333	0.0166667	0.116667	9.47843	0.00354201	2.80735	1	-2.61218	0.390139	4.05889	1	gi|576993890|gb|EUC66556.1|	transmembrane adaptor Erv26 [Rhizoctonia solani AG-3 Rhs1AP]	cci:CC1G_00178	phosphatidylinositol phosphate phosphatase	YHR181w	[TI] KOG4136 Predicted mitochondrial cholesterol transporter	sp|P38869|SVP26_YEAST	Protein SVP26 OS=Saccharomyces cerevisiae (strain ATCC 204508 / S288c) GN=SVP26 PE=1 SV=1	--
Zoff058124	116	115	55	193	126	1897	35	24	497	11	33	18	5.71	5.76	2.71	9.5	7.24	94.12	1.77	1.19	25.03	0.56	1.71	0.89	4.72667	36.9533	9.33	1.05333	2.96681	0.0251843	-3.14692	0.244295	-5.13267	0.00025672	0.981054	1	gi|628278405|ref|XP_007753155.1|	sterol carrier protein 2 [Cladophialophora yegresii CBS 114405]	bfu:BC1G_03902	hypothetical protein ; K08764 sterol carrier protein 2 [EC:2.3.1.176]	Hs19923233_1	[I] KOG1406 Peroxisomal 3-ketoacyl-CoA-thiolase P-44/SCP2	sp|P11915|NLTP_RAT	Non-specific lipid-transfer protein OS=Rattus norvegicus GN=Scp2 PE=1 SV=3	GO:0004315,sterol carrier protein 2; GO:0006633,sterol carrier protein 2
Zoff058186	0	1	0	3	3	32	0	0	5	0	2	2	0	0.05	0	0.15	0.17	1.59	0	0	0.25	0	0.1	0.1	0.0166667	0.636667	0.0833333	0.0666667	5.2555	0.0375055	-0.321928	1	-3.2555	0.260691	2.32193	1	gi|628302053|ref|XP_007734165.1|	hypothetical protein A1O3_05855 [Capronia epimyces CBS 606.96]	pan:PODANSg1525	hypothetical protein	At5g54160	[R] KOG3178 Hydroxyindole-O-methyltransferase and related SAM-dependent methyltransferases	sp|Q9P900|OMTB_ASPFL	Demethylsterigmatocystin 6-O-methyltransferase OS=Aspergillus flavus GN=omtB PE=3 SV=1	GO:0008171,catechol o-methyltransferase; GO:0032259,catechol o-methyltransferase
Zoff058312	0	0	0	4	0	37	0	0	3	0	1	1	0	0	0	0.2	0	1.84	0	0	0.15	0	0.05	0.05	0.001	0.68	0.05	0.0333333	9.40939	0.0389729	-0.584963	1	-4.3505	0.19733	5.64386	1	gi|684174289|ref|XP_009161013.1|	hypothetical protein HMPREF1120_08507 [Exophiala dermatitidis NIH/UT8656]	--	--	--	--	--	--	--
Zoff058402	0	0	0	19	0	10	0	1	0	6	0	0	0	0	0	0.94	0	0.5	0	0.05	0	0.3	0	0	0.001	0.48	0.0166667	0.1	8.90689	0.0464175	2.58496	1	-2.26303	0.983605	4.05889	1	gi|576993390|gb|EUC66061.1|	ubiquitin carboxyl-terminal hydrolase [Rhizoctonia solani AG-3 Rhs1AP]	lbc:LACBIDRAFT_316612	hypothetical protein; K11836 ubiquitin carboxyl-terminal hydrolase 5/13 [EC:3.1.2.15]	SPBC6B1.06c	[O] KOG0944 Ubiquitin-specific protease UBP14	sp|Q11119|UBP14_SCHPO	Ubiquitin carboxyl-terminal hydrolase 14 OS=Schizosaccharomyces pombe (strain 972 / ATCC 24843) GN=ubp14 PE=1 SV=2	GO:0036459,ubiquitin carboxyl-terminal hydrolase 14; GO:0006511,ubiquitin carboxyl-terminal hydrolase 14; GO:0008242,ubiquitin carboxyl-terminal hydrolase 14; GO:0008270,ubiquitin carboxyl-terminal hydrolase 14; GO:0008234,ubiquitin carboxyl-terminal hydrolase 14
Zoff058416	1	1	0	3	4	79	0	1	5	2	0	0	0.05	0.05	0	0.15	0.23	3.92	0	0.05	0.25	0.1	0	0	0.0333333	1.43333	0.1	0.0333333	5.42626	0.0112563	-1.58496	1	-5.42626	0.0239754	1.58496	1	gi|628293148|ref|XP_007739057.1|	hypothetical protein A1O5_00247 [Cladophialophora psammophila CBS 110553]	ure:UREG_02286	hypothetical protein	--	--	--	--	GO:0008152,zz type zinc finger protein; GO:0008270,zz type zinc finger protein; GO:0003824,zz type zinc finger protein
Zoff058550	0	1.99	1	7	2	27	0	0	5.99	0	0	0	0	0.1	0.05	0.34	0.11	1.34	0	0	0.3	0	0	0	0.05	0.596667	0.1	0.001	3.57693	0.105169	-6.64386	1	-9.22078	0.0169456	1	1	gi|628341015|ref|XP_007747490.1|	hypothetical protein A1O5_08719 [Cladophialophora psammophila CBS 110553]	afm:AFUA_4G07100	nuclear envelope protein; K14315 nucleoporin NDC1	--	--	sp|O13961|NDC1_SCHPO	Nuclear envelope protein ndc1 OS=Schizosaccharomyces pombe (strain 972 / ATCC 24843) GN=cut11 PE=2 SV=2	--
Zoff058552	4	2	2	13	4	9	1	0	13	0	0	0	0.2	0.1	0.1	0.64	0.23	0.45	0.05	0	0.65	0	0	0	0.133333	0.44	0.233333	0.001	1.72247	0.62214	-7.86625	0.837148	-8.78136	0.0149102	0.807355	1	gi|684159895|ref|XP_009153825.1|	hypothetical protein HMPREF1120_01558 [Exophiala dermatitidis NIH/UT8656]	ang:ANI_1_964144	An16g07300; ribosome biogenesis protein Noc4; K14771 U3 small nucleolar RNA-associated protein 19	SPBC1604.06c	[J] KOG2154 Predicted nucleolar protein involved in ribosome biogenesis	sp|O94372|YG06_SCHPO	Uncharacterized protein C1604.06c OS=Schizosaccharomyces pombe (strain 972 / ATCC 24843) GN=SPBC1604.06c PE=3 SV=1	GO:0042254,ribosome biogenesis protein noc4
Zoff058590	6	72	8	55	38	26	5	0	4	1	0	0	0.3	3.61	0.39	2.71	2.18	1.29	0.25	0	0.2	0.05	0	0	1.43333	2.06	0.15	0.0166667	0.52327	1	-3.16993	1	-6.94953	2.18e-06	-3.25634	0.454163	gi|672142749|ref|XP_008795238.1|	PREDICTED: GDP-L-galactose phosphorylase 1-like [Phoenix dactylifera]	sbi:SORBI_08g005410	hypothetical protein; K14190 GDP-L-galactose phosphorylase [EC:2.7.7.69]	At5g55120	[R] KOG2720 Predicted hydrolase (HIT family)	sp|Q9FLP9|GGAP2_ARATH	GDP-L-galactose phosphorylase 2 OS=Arabidopsis thaliana GN=VTC5 PE=1 SV=1	GO:0008152,gdp-l-galactose phosphorylase 2-like; GO:0080048,gdp-l-galactose phosphorylase 2-like
Zoff058607	0	0	0	0	0	0	0	0	0	2	0	66	0	0	0	0	0	0	0	0	0	0.1	0	3.26	0.001	0.001	0.001	1.12	0	1	10.1293	0.130344	10.1293	0.0336926	0	1	gi|301122871|ref|XP_002909162.1|	elongator complex protein 1, putative [Phytophthora infestans T30-4]	pif:PITG_00575	elongator complex protein 1, putative; K11373 elongator complex protein 1	Hs15298985	[K] KOG1920 IkappaB kinase complex, IKAP component	sp|Q8WND5|ELP1_RABIT	Elongator complex protein 1 OS=Oryctolagus cuniculus GN=IKBKAP PE=2 SV=1	--
Zoff058621	0	0	0	17	4	7	0	0	1	1	0	0	0	0	0	0.84	0.23	0.35	0	0	0.05	0.05	0	0	0.001	0.473333	0.0166667	0.0166667	8.88671	0.00720585	0	1	-4.82782	0.048386	4.05889	1	gi|639570977|gb|KDN48388.1|	hypothetical protein RSAG8_02980, partial [Rhizoctonia solani AG-8 WAC10335]	scm:SCHCODRAFT_12749	hypothetical protein; K14555 U3 small nucleolar RNA-associated protein 13	Hs19913369	[A] KOG0319 WD40-repeat-containing subunit of the 18S rRNA processing complex	sp|Q5U2W5|TBL3_RAT	Transducin beta-like protein 3 OS=Rattus norvegicus GN=Tbl3 PE=2 SV=1	GO:0032040,u3 small nucleolar rna-associated protein; GO:0006364,u3 small nucleolar rna-associated protein
Zoff058641	0	0	2	0	0	0	0	0	0	6	0	47	0	0	0.1	0	0	0	0	0	0	0.3	0	2.32	0.0333333	0.001	0.001	0.873333	-5.05889	1	9.77039	0.128735	9.77039	0.0301166	-5.05889	1	gi|570969512|gb|ETP32631.1|	trehalose-phosphatase [Phytophthora parasitica P10297]	pif:PITG_02307	alpha,alpha-trehalose-phosphate synthase [UDP-forming], putative	At1g06410	[G] KOG1050 Trehalose-6-phosphate synthase component TPS1 and related subunits	sp|Q9LMI0|TPS7_ARATH	Probable alpha,alpha-trehalose-phosphate synthase [UDP-forming] 7 OS=Arabidopsis thaliana GN=TPS7 PE=1 SV=1	GO:0008152,trehalose-phosphatase; GO:0003824,trehalose-phosphatase
Zoff058706	3.92	2	2	11	1.78	44.83	0	0	7	0	0	0	0.19	0.1	0.1	0.54	0.1	2.22	0	0	0.35	0	0	0	0.13	0.953333	0.116667	0.001	2.87447	0.147169	-6.86625	1	-9.89684	0.00500924	-0.156119	1	gi|656912934|gb|KEF58516.1|	hypothetical protein A1O9_06442 [Exophiala aquamarina CBS 119918]	ang:ANI_1_428164	An18g03340; hypothetical protein	--	--	sp|O60082|YQK8_SCHPO	Uncharacterized protein C1494.08c OS=Schizosaccharomyces pombe (strain 972 / ATCC 24843) GN=SPCC1494.08c PE=4 SV=1	--
Zoff059028	61	71	53	68	59	47	44	13	64	9	13	20	3	3.56	2.62	3.35	3.39	2.33	2.23	0.64	3.22	0.46	0.67	0.99	3.06	3.02333	2.03	0.706667	-0.0173916	1	-1.52238	0.963109	-2.09704	0.0342985	-0.592052	1	gi|695038008|ref|XP_009406505.1|	PREDICTED: uncharacterized protein LOC103989402 [Musa acuminata subsp. malaccensis]	rcu:RCOM_0584600	hypothetical protein	--	--	--	--	--
Zoff059065	2	1	1	6	3	30	2	1	10	0	0	0	0.1	0.05	0.05	0.3	0.17	1.49	0.1	0.05	0.5	0	0	0	0.0666667	0.653333	0.216667	0.001	3.29278	0.101434	-7.75933	0.595872	-9.35168	0.0122975	1.70044	1	gi|684162319|ref|XP_009155037.1|	hypothetical protein HMPREF1120_02744 [Exophiala dermatitidis NIH/UT8656]	cpw:CPC735_034830	hypothetical protein	Hs20270337_2	[S] KOG2428 Uncharacterized conserved protein	sp|Q5XJE5|LEO1_MOUSE	RNA polymerase-associated protein LEO1 OS=Mus musculus GN=Leo1 PE=1 SV=2	--
Zoff059237	15	11	19	26	19	24	4	1	8	1	6	1	0.74	0.55	0.94	1.28	1.09	1.19	0.2	0.05	0.4	0.05	0.31	0.05	0.743333	1.18667	0.216667	0.136667	0.674834	1	-0.664816	1	-3.11818	0.0177908	-1.77853	1	gi|671166820|ref|XP_008723876.1|	hypothetical protein G647_09660 [Cladophialophora carrionii CBS 160.54]	bfu:BC1G_13346	hypothetical protein ; K05349 beta-glucosidase [EC:3.2.1.21]	--	--	sp|B0Y3M6|BGLI_ASPFC	Probable beta-glucosidase I OS=Neosartorya fumigata (strain CEA10 / CBS 144.89 / FGSC A1163) GN=bglI PE=3 SV=1	GO:0004553,beta-glucosidase; GO:0030245,beta-glucosidase
Zoff059253	1	0	0	2	1	0	0	1	0	41	1	663	0.05	0	0	0.1	0.06	0	0	0.05	0	2.08	0.05	32.78	0.0166667	0.0533333	0.0166667	11.6367	1.67807	1	9.4475	0.0144324	7.76942	0.00186458	0	1	gi|301106334|ref|XP_002902250.1|	conserved hypothetical protein [Phytophthora infestans T30-4]	pif:PITG_10462	hypothetical protein	--	--	sp|Q54PS9|OSB9_DICDI	Oxysterol-binding protein 9 OS=Dictyostelium discoideum GN=osbI PE=3 SV=1	--
Zoff059270	0	0	0	1	1.54	34.63	0	0	0	0	0	0	0	0	0	0.05	0.09	1.72	0	0	0	0	0	0	0.001	0.62	0.001	0.001	9.27612	0.0388479	0	1	-9.27612	0.0539287	0	1	gi|671171166|ref|XP_008726049.1|	hypothetical protein G647_03482 [Cladophialophora carrionii CBS 160.54]	afv:AFLA_044450	hypothetical protein	SPBC216.03	[G] KOG1203 Predicted dehydrogenase	sp|Q9Y7K0|YGL3_SCHPO	UPF0659 protein C216.03 OS=Schizosaccharomyces pombe (strain 972 / ATCC 24843) GN=SPBC216.03 PE=3 SV=1	GO:0005622,nad dependent epimerase dehydratase family protein
Zoff059428	0	0	0	31	5	5	0	0	1	1	2	4	0	0	0	1.53	0.29	0.25	0	0	0.05	0.05	0.1	0.2	0.001	0.69	0.0166667	0.116667	9.43045	0.00334203	2.80735	1	-2.5642	0.318131	4.05889	1	gi|576990727|gb|EUC63436.1|	voltage-dependent ion-selective channel protein, partial [Rhizoctonia solani AG-3 Rhs1AP]	--	--	--	--	--	--	--
Zoff059459	7	10	8	12.92	7	34	795.72	8	44.2	236.9	20	263.49	0.34	0.5	0.39	0.64	0.4	1.69	40.24	0.4	2.23	12.02	1.03	13.03	0.41	0.91	14.29	8.69333	1.15024	0.812581	-0.717025	1	3.25597	0.0196459	5.12324	0.102163	gi|695021500|ref|XP_009397839.1|	PREDICTED: protein HOTHEAD-like isoform X1 [Musa acuminata subsp. malaccensis]	smo:SELMODRAFT_429577	hypothetical protein	At1g12570	[R] KOG1238 Glucose dehydrogenase/choline dehydrogenase/mandelonitrile lyase (GMC oxidoreductase family)	sp|Q9S746|HTH_ARATH	Protein HOTHEAD OS=Arabidopsis thaliana GN=HTH PE=1 SV=1	GO:0050660,protein hothead-like; GO:0008812,protein hothead-like; GO:0055114,protein hothead-like; GO:0006066,protein hothead-like
Zoff059537	0	0	0	17	1	6	0	0	1	7	0	1	0	0	0	0.84	0.06	0.3	0	0	0.05	0.36	0	0.05	0.001	0.4	0.0166667	0.136667	8.64386	0.0402847	3.03562	1	-1.54934	1	4.05889	1	gi|576992093|gb|EUC64773.1|	dolichol kinase, putative [Rhizoctonia solani AG-3 Rhs1AP]	scm:SCHCODRAFT_257244	hypothetical protein	SPCC63.10c	[I] KOG2468 Dolichol kinase	sp|Q9Y7T6|SEC59_SCHPO	Dolichol kinase sec59 OS=Schizosaccharomyces pombe (strain 972 / ATCC 24843) GN=sec59 PE=3 SV=3	GO:0043048,dolichol kinase; GO:0030176,dolichol kinase; GO:0016310,dolichol kinase; GO:0007165,dolichol kinase; GO:0004168,dolichol kinase
Zoff059542	0	1	0	3	3	29	1	0	8	0	0	0	0	0.05	0	0.15	0.17	1.44	0.05	0	0.4	0	0	0	0.0166667	0.586667	0.15	0.001	5.1375	0.0445696	-7.22882	1	-9.1964	0.0248926	3.16993	1	gi|567849172|gb|AHC96869.1|	actin, partial [Pseudocercospora eucalyptorum]	ang:ANI_1_106134	An15g00560; actin; K05692 actin beta/gamma 1	SPBC32H8.12c	[Z] KOG0676 Actin and related proteins	sp|P53455|ACT_AJECG	Actin OS=Ajellomyces capsulatus (strain G186AR / H82 / ATCC MYA-2454 / RMSCC 2432) GN=HCBG_08711 PE=2 SV=2	--
Zoff059599	0	0	0	3	2	20	0	0	8	0	0	0	0	0	0	0.15	0.11	0.99	0	0	0.4	0	0	0	0.001	0.416667	0.133333	0.001	8.70275	0.0408863	-7.05889	1	-8.70275	0.0546098	7.05889	1	gi|628344542|ref|XP_007748616.1|	hypothetical protein A1O5_09848 [Cladophialophora psammophila CBS 110553]	fgr:FG04987.1	hypothetical protein	--	--	sp|Q5B8L0|PRTT_EMENI	Transcriptional activator of proteases prtT OS=Emericella nidulans (strain FGSC A4 / ATCC 38163 / CBS 112.46 / NRRL 194 / M139) GN=prtT PE=3 SV=1	GO:0006357,transcriptional activator of proteases prtt; GO:0008270,transcriptional activator of proteases prtt; GO:0000981,transcriptional activator of proteases prtt; GO:0005634,transcriptional activator of proteases prtt
Zoff059696	0	0	0	4	2	73.16	2	0	1.07	0	1	1	0	0	0	0.2	0.11	3.63	0.1	0	0.05	0	0.05	0.05	0.001	1.31333	0.05	0.0333333	10.359	0.00308544	-0.584963	1	-5.30012	0.0261423	5.64386	1	gi|656913719|gb|KEF59299.1|	hypothetical protein A1O9_04143 [Exophiala aquamarina CBS 119918]	cpw:CPC735_061370	calcineurin-like phosphoesterase, putative	SPBPB2B2.06c	[F] KOG4419 5' nucleotidase	sp|Q9HDU9|YHE6_SCHPO	Uncharacterized protein PB2B2.06c OS=Schizosaccharomyces pombe (strain 972 / ATCC 24843) GN=SPBPB2B2.06c PE=3 SV=1	GO:0009166,ser thr protein phosphatase family; GO:0016787,ser thr protein phosphatase family
Zoff059712	0	0	0	27	3	6	0	0	3	1	0	8	0	0	0	1.33	0.17	0.3	0	0	0.15	0.05	0	0.4	0.001	0.6	0.05	0.15	9.22882	0.00665447	1.58496	1	-2	0.841066	5.64386	1	gi|660970444|gb|KEP54210.1|	F-box protein [Rhizoctonia solani 123E]	--	--	--	--	--	--	--
Zoff059881	16	18	13.79	26	23	48.94	11	11	36	6	2	0	0.79	0.9	0.68	1.28	1.32	2.43	0.56	0.54	1.81	0.3	0.1	0	0.79	1.67667	0.97	0.133333	1.08567	0.515659	-2.86295	0.398674	-3.65249	0.0047371	0.296132	1	gi|661887456|emb|CDP09236.1|	unnamed protein product [Coffea canephora]	pop:POPTR_1087573	hypothetical protein	--	--	sp|Q9FGH2|LSH5_ARATH	Protein LIGHT-DEPENDENT SHORT HYPOCOTYLS 5 OS=Arabidopsis thaliana GN=LSH5 PE=1 SV=1	--
Zoff060311	4	4	3	13	3	62	1	2	19	0	0	2	0.2	0.2	0.15	0.64	0.17	3.08	0.05	0.1	0.96	0	0	0.1	0.183333	1.29667	0.37	0.0333333	2.82227	0.0964948	-3.47249	0.923908	-5.2817	0.0111243	1.01306	1	gi|628315283|ref|XP_007735988.1|	hypothetical protein A1O3_07691 [Capronia epimyces CBS 606.96]	aor:AOR_1_4154	AO090003000002; histone-lysine N-methyltransferase, H3 lysine-4 specific; K11422 histone-lysine N-methyltransferase SETD1 [EC:2.1.1.43]	YHR119w	[BK] KOG1080 Histone H3 (Lys4) methyltransferase complex, subunit SET1 and related methyltransferases	sp|Q2UMH3|SET1_ASPOR	Histone-lysine N-methyltransferase, H3 lysine-4 specific OS=Aspergillus oryzae (strain ATCC 42149 / RIB 40) GN=set1 PE=3 SV=1	GO:0034968,histone-lysine n-methyltransferase; GO:0048188,histone-lysine n-methyltransferase; GO:0003676,histone-lysine n-methyltransferase; GO:0018024,histone-lysine n-methyltransferase; GO:0000166,histone-lysine n-methyltransferase; GO:0005694,histone-lysine n-methyltransferase
Zoff060351	1	0	0	20	6	14	0	0	0	1	1	0	0.05	0	0	0.98	0.34	0.69	0	0	0	0.05	0.05	0	0.0166667	0.67	0.001	0.0333333	5.32912	0.00211759	5.05889	1	-4.32912	0.0178358	-4.05889	1	gi|576992913|gb|EUC65588.1|	U3 small nucleolar RNA-associated protein, putative [Rhizoctonia solani AG-3 Rhs1AP]	lbc:LACBIDRAFT_304153	hypothetical protein; K14553 U3 small nucleolar RNA-associated protein 18	SPBC29A3.06	[R] KOG2055 WD40 repeat protein	sp|P78750|UTP18_SCHPO	Probable U3 small nucleolar RNA-associated protein 18 OS=Schizosaccharomyces pombe (strain 972 / ATCC 24843) GN=SPBC29A3.06 PE=2 SV=3	--
Zoff060416	10	50.04	24.12	35.99	14	7.97	9.04	1	22	1	1	0	0.49	2.51	1.19	1.77	0.8	0.4	0.46	0.05	1.11	0.05	0.05	0	1.39667	0.99	0.54	0.0333333	-0.496487	1	-4.01792	0.394946	-4.89239	0.00466252	-1.37096	1	gi|671168156|ref|XP_008724544.1|	hypothetical protein G647_10331 [Cladophialophora carrionii CBS 160.54]	act:ACLA_096940	mRNA-nucleus export ATPase (Elf1), putative; K03235 elongation factor 3	YPL226w_2	[EJ] KOG0062 ATPase component of ABC transporters with duplicated ATPase domains/Translation elongation factor EF-3b	sp|Q08972|NEW1_YEAST	[NU+] prion formation protein 1 OS=Saccharomyces cerevisiae (strain ATCC 204508 / S288c) GN=NEW1 PE=1 SV=1	GO:0019752,mrna-nucleus export atpase; GO:0003746,mrna-nucleus export atpase; GO:0006200,mrna-nucleus export atpase; GO:0006414,mrna-nucleus export atpase; GO:0005524,mrna-nucleus export atpase; GO:0016887,mrna-nucleus export atpase; GO:0004451,mrna-nucleus export atpaseGO:0005634,mrna-nucleus export atpase
Zoff060496	0	0	0	0	0	0	0	0	0	5	1	78	0	0	0	0	0	0	0	0	0	0.25	0.05	3.86	0.001	0.001	0.001	1.38667	0	1	10.4374	0.0505156	10.4374	0.00714584	0	1	gi|570324817|gb|ETO72765.1|	hypothetical protein F444_11219 [Phytophthora parasitica P1976]	pif:PITG_03039	hypothetical protein	CE25049	[W] KOG1836 Extracellular matrix glycoprotein Laminin subunits alpha and gamma	--	--	--
Zoff060497	1	0	6	7	4	48	2	0	8	1	0	0	0.05	0	0.3	0.34	0.23	2.38	0.1	0	0.4	0.05	0	0	0.116667	0.983333	0.166667	0.0166667	3.07529	0.174912	-3.32193	1	-5.88264	0.0104919	0.514573	1	gi|656907023|gb|KEF52763.1|	hypothetical protein A1O9_11180 [Exophiala aquamarina CBS 119918]	nfi:NFIA_035000	hypothetical protein	--	--	--	--	--
Zoff060514	0	1	0	7.91	2.23	134.46	0	0	16.37	0	0	0	0	0.05	0	0.39	0.13	6.67	0	0	0.82	0	0	0	0.0166667	2.39667	0.273333	0.001	7.16792	0.00221846	-8.09452	0.962527	-11.2268	0.0015085	4.03562	1	gi|145236781|ref|XP_001391038.1|	hypothetical protein ANI_1_576054 [Aspergillus niger CBS 513.88]	ang:ANI_1_576054	An06g02170; hypothetical protein	YHR209w	[R] KOG3010 Methyltransferase	sp|P38892|CRG1_YEAST	Probable S-adenosylmethionine-dependent methyltransferase CRG1 OS=Saccharomyces cerevisiae (strain ATCC 204508 / S288c) GN=CRG1 PE=1 SV=1	GO:0008152,s-adenosyl-l-methionine-dependent methyltransferase; GO:0003824,s-adenosyl-l-methionine-dependent methyltransferase
Zoff060555	0	0	0	10	1	37	3	1	8	0	0	0	0	0	0	0.49	0.06	1.84	0.15	0.05	0.4	0	0	0	0.001	0.796667	0.2	0.001	9.63783	0.00571305	-7.64386	0.607896	-9.63783	0.011261	7.64386	0.841165	gi|671180127|ref|XP_008730525.1|	hypothetical protein G647_07991 [Cladophialophora carrionii CBS 160.54]	nfi:NFIA_073580	U1 small nuclear ribonucleoprotein 70 kDa; K11093 U1 small nuclear ribonucleoprotein 70kDa	SPAC19A8.13	[A] KOG0113 U1 small nuclear ribonucleoprotein (RRM superfamily)	sp|O13829|RU17_SCHPO	U1 small nuclear ribonucleoprotein 70 kDa homolog OS=Schizosaccharomyces pombe (strain 972 / ATCC 24843) GN=usp101 PE=1 SV=1	GO:0019013,u1 small nuclear ribonucleoprotein 70 kda; GO:0003676,u1 small nuclear ribonucleoprotein 70 kda; GO:0030529,u1 small nuclear ribonucleoprotein 70 kda; GO:0000166,u1 small nuclear ribonucleoprotein 70 kda
Zoff060809	0	1	0	5	2	39	1	0	6	0	2	0	0	0.05	0	0.25	0.11	1.94	0.05	0	0.3	0	0.1	0	0.0166667	0.766667	0.116667	0.0333333	5.52356	0.0239789	-1.80735	1	-4.52356	0.0860812	2.80735	1	gi|656908925|gb|KEF54635.1|	hypothetical protein A1O9_09077 [Exophiala aquamarina CBS 119918]	pno:SNOG_00157	hypothetical protein	SPBP8B7.23	[O] KOG2164 Predicted E3 ubiquitin ligase	sp|O94271|YORN_SCHPO	Uncharacterized RING finger protein P8B7.23 OS=Schizosaccharomyces pombe (strain 972 / ATCC 24843) GN=SPBP8B7.23 PE=3 SV=1	GO:0008270,ring finger domain protein
Zoff060826	0	0	0	21	1	6	0	0	0	3	0	0	0	0	0	1.03	0.06	0.3	0	0	0	0.15	0	0	0.001	0.463333	0.001	0.05	8.85591	0.0315849	5.64386	1	-3.21205	0.423649	0	1	gi|576993652|gb|EUC66318.1|	import inner membrane translocase subunit Tim54 [Rhizoctonia solani AG-3 Rhs1AP]	lbc:LACBIDRAFT_181977	hypothetical protein	--	--	sp|P0CR90|TIM54_CRYNJ	Mitochondrial import inner membrane translocase subunit TIM54 OS=Cryptococcus neoformans var. neoformans serotype D (strain JEC21 / ATCC MYA-565) GN=TIM54 PE=3 SV=1	--
Zoff060855	5117.47	3414.54	4171.56	11814.6	10168.5	9299.04	3622.13	4029.1	3313.36	2206.19	6355.29	2811.87	251.84	171.08	205.92	581.48	584.07	461.39	183.17	199.55	166.86	111.92	328.65	139.01	209.613	542.313	183.193	193.193	1.3714	0.0107852	0.0766783	1	-1.48908	0.157924	-0.194363	1	gi|697110446|ref|XP_009609090.1|	PREDICTED: polyubiquitin 11, partial [Nicotiana tomentosiformis]	pop:POPTR_555369	hypothetical protein	At4g05050	[OR] KOG0001 Ubiquitin and ubiquitin-like proteins	sp|P0CH33|UBQ11_ARATH	Polyubiquitin 11 OS=Arabidopsis thaliana GN=UBQ11 PE=1 SV=1	GO:0005773,ubiquitin-like protein; GO:0006464,ubiquitin-like protein; GO:0006511,ubiquitin-like protein; GO:0005618,ubiquitin-like protein; GO:0005634,ubiquitin-like protein
Zoff060873	0	0	0	0	0	0	0	0	0	10	0	175.97	0	0	0	0	0	0	0	0	0	0.51	0	8.7	0.001	0.001	0.001	3.07	0	1	11.584	0.0417863	11.584	0.00482013	0	1	gi|695426847|ref|XP_009529524.1|	hypothetical protein PHYSODRAFT_561505 [Phytophthora sojae]	pif:PITG_00503	Rab32 family GTPase, putative; K07918 Ras-related protein Rab-32	Hs5803133	[T] KOG4423 GTP-binding protein-like, RAS superfamily	sp|Q06AU5|RAB32_PIG	Ras-related protein Rab-32 OS=Sus scrofa GN=RAB32 PE=2 SV=1	GO:0090382,ras-related protein rab-32; GO:0051641,ras-related protein rab-32; GO:0016023,ras-related protein rab-32; GO:0005525,ras-related protein rab-32; GO:0015031,ras-related protein rab-32; GO:0007264,ras-related protein rab-32; GO:0033059,ras-related protein rab-32GO:0032403,ras-related protein rab-32GO:0006814,ras-related protein rab-32
Zoff060919	0	0	0	22	5	4	0	0	0	0	0	0	0	0	0	1.08	0.29	0.2	0	0	0	0	0	0	0.001	0.523333	0.001	0.001	9.03159	0.00864153	0	1	-9.03159	0.0162141	0	1	gi|576988427|gb|EUC61151.1|	sister chromatid cohesion protein Pds5, putative [Rhizoctonia solani AG-3 Rhs1AP]	cci:CC1G_05280	cohesin-associated protein Pds5; K11267 sister chromatid cohesion protein PDS5	SPAC110.02	[D] KOG1525 Sister chromatid cohesion complex Cohesin, subunit PDS5	sp|Q9HFF5|PDS5_SCHPO	Sister chromatid cohesion protein pds5 OS=Schizosaccharomyces pombe (strain 972 / ATCC 24843) GN=pds5 PE=1 SV=1	--
Zoff061026	0	0	0	7	3	22	1	0	0	0	1	0	0	0	0	0.34	0.17	1.09	0.05	0	0	0	0.05	0	0.001	0.533333	0.0166667	0.0166667	9.05889	0.00742273	0	1	-5	0.0494287	4.05889	1	gi|470270150|ref|XP_004362650.1|	long chain fatty acid elongase [Dictyostelium fasciculatum]	ddi:DDB_G0292896	eloA; GNS1/SUR4 family protein	SPAC1B2.03c	[I] KOG3071 Fatty acyl-CoA elongase/Polyunsaturated fatty acid specific elongation enzyme	sp|Q54CJ4|ELOA_DICDI	Elongation of fatty acids protein A OS=Dictyostelium discoideum GN=eloA PE=2 SV=1	--
Zoff061114	0	0	0	25	6	10	0	0	2	6	0	1	0	0	0	1.23	0.34	0.5	0	0	0.1	0.3	0	0.05	0.001	0.69	0.0333333	0.116667	9.43045	0.000722158	1.80735	1	-2.5642	0.340375	5.05889	1	gi|471887587|emb|CCO33071.1|	hypothetical protein BN14_07140 [Rhizoctonia solani AG-1 IB]	cci:CC1G_00013	hypothetical protein	--	--	--	--	--
Zoff061209	0	0	1	267	0	1	1	1	0	1	0	0	0	0	0.05	13.14	0	0.05	0.05	0.05	0	0.05	0	0	0.0166667	4.39667	0.0333333	0.0166667	8.0433	0.0188492	-1	1	-8.0433	0.0240111	1	1	gi|571761230|gb|ETR48372.1|	hypothetical protein V426_1069 [Acinetobacter baumannii UH9907]	tva:TVAG_362900	Extensin-like region family protein	--	--	--	--	--
Zoff061548	0	0	0	0	0	0	0	0	1	4	0	60	0	0	0	0	0	0	0	0	0.05	0.2	0	2.97	0.001	0.001	0.0166667	1.05667	0	1	5.98641	0.209728	10.0453	0.0265759	4.05889	1	gi|673039201|ref|XP_008873561.1|	hypothetical protein H310_09301 [Aphanomyces invadans]	pif:PITG_00854	hypothetical protein	--	--	--	--	--
Zoff061614	16	5	21	6	5	11	51.17	20.5	31.48	114.16	90.43	94.4	0.79	0.25	1.04	0.3	0.29	0.55	2.59	1.02	1.59	5.79	4.68	4.67	0.693333	0.38	1.73333	5.04667	-0.86755	1	1.54178	0.637189	3.73126	2.15e-05	1.32193	1	gi|695025344|ref|XP_009399922.1|	PREDICTED: NAC domain-containing protein 68-like [Musa acuminata subsp. malaccensis]	osa:4334553	Os03g0815100	--	--	sp|Q52QH4|NAC68_ORYSJ	NAC domain-containing protein 68 OS=Oryza sativa subsp. japonica GN=NAC68 PE=2 SV=1	GO:0006355,nac domain-containing protein 67-like; GO:0003677,nac domain-containing protein 67-like
Zoff061778	101	53.38	69	22.81	13	64	760.45	37	180.35	4813.83	277.98	3106.97	4.97	2.67	3.41	1.12	0.75	3.18	38.46	1.83	9.08	244.2	14.38	153.6	3.68333	1.68333	16.4567	137.393	-1.12969	0.627723	3.06157	0.250662	6.35085	1.77e-06	2.15959	0.696532	gi|604343585|gb|EYU42474.1|	hypothetical protein MIMGU_mgv1a026027mg, partial [Erythranthe guttata]	vvi:100261765	hypothetical protein LOC100261765	--	--	sp|Q9ZP41|EGC_CITJA	EG45-like domain containing protein OS=Citrus jambhiri GN=CjBAp12 PE=1 SV=1	GO:0016023,eg45-like domain containing protein
Zoff061821	1	1	1	5	4	22	2	0	15	0	0	0	0.05	0.05	0.05	0.25	0.23	1.09	0.1	0	0.76	0	0	0	0.05	0.523333	0.286667	0.001	3.38773	0.0985002	-8.16323	0.626895	-9.03159	0.0162141	2.51937	1	gi|656917108|gb|KEF62686.1|	hypothetical protein A1O9_00659 [Exophiala aquamarina CBS 119918]	act:ACLA_037030	hypothetical protein	--	--	sp|Q9USS8|YNB2_SCHPO	Uncharacterized protein C4.02c OS=Schizosaccharomyces pombe (strain 972 / ATCC 24843) GN=SPBC4.02c PE=1 SV=2	--
Zoff061838	0	0	0	0	0	0	0	1	0	42	2	576	0	0	0	0	0	0	0	0.05	0	2.13	0.1	28.48	0.001	0.001	0.0166667	10.2367	0	1	9.26256	0.0112541	13.3215	0.000171822	4.05889	1	gi|570995737|gb|ETP52531.1|	hypothetical protein F442_02480, partial [Phytophthora parasitica P10297]	pif:PITG_06649	adenylyl cyclase-associated protein, putative	Hs5453593	[ZT] KOG2675 Adenylate cyclase-associated protein (CAP/Srv2p)	sp|P54654|CAP_DICDI	Adenylyl cyclase-associated protein OS=Dictyostelium discoideum GN=cap PE=1 SV=1	GO:0000902,adenylyl cyclase-associated; GO:0007010,adenylyl cyclase-associated; GO:0003779,adenylyl cyclase-associated
Zoff061914	0	0	2	7	1	77	4	1	21	0	3	1	0	0	0.1	0.34	0.06	3.82	0.2	0.05	1.06	0	0.16	0.05	0.0333333	1.40667	0.436667	0.07	5.39917	0.0213377	-2.64111	1	-4.32878	0.069301	3.71149	0.928186	gi|671182386|ref|XP_008731654.1|	hypothetical protein G647_09127 [Cladophialophora carrionii CBS 160.54]	pcs:Pc13g05480	Pc13g05480	SPBC1778.06c	[Z] KOG0046 Ca2+-binding actin-bundling protein (fimbrin/plastin), EF-Hand protein superfamily	sp|O59945|FIMB_SCHPO	Fimbrin OS=Schizosaccharomyces pombe (strain 972 / ATCC 24843) GN=fim1 PE=1 SV=1	GO:0003779,fimbrin; GO:0005509,fimbrin
[truncated: 15,991 more rows]
[truncated: 5 more columns]
