# Supplementary material for: Identification and expression profile of the soil moisture and Ralstonia solanacearum response CYPome in ginger (Zingiber officinale)
Source: PeerJ. 2021 Aug 2;9:e11755. doi: 10.7717/peerj.11755 (PMC8340902; doi:10.7717/peerj.11755)
Supplement: Supplemental Information 4 [file peerj-09-11755-s004.xlsx]

## Sheet: Sheet1
Table S4 Expression validation using qRT-PCR
SeqID	F primer	R primer	RNA-Seq log2FC				qRT-PCR log2FC
			LIvsHI	LIvsLUN	HIvsHUN	LUNvsHUN	LIvsHI	LIvsLUN	HIvsHUN	LUNvsHUN
Zoff203766	ACCGTATTGGCGATAGTGG	GGTTCTGCTCGTCGTTTGG	1.7765	-0.194642	-0.866351	1.10479	0.963474	0.263034	-0.68966	1.8679
Zoff294951	TGGCTCATTTCCAGACTCATC	GCTTCAGAACCATTTCCCTATC	-1.0758	-0.681792	0.85219	0.45818	-0.358454	-0.915936	0.713696	0.124328
Zoff216312	AGGAAGTGGGAGCAGTAGAAG	GTCAAACACCATCAGCGAGAT	-1.63138	-1.34225	0.650492	0.361366	-0.810966	-2.25154	1.0072	0.516015
Zoff294948	CCTGGTTGGATTTCTTAGATTTGC	CCGTGCCTTTCGAGTTTGATG	-0.331038	2.56552	0.387793	-2.50876	-0.104697	1.37851	0.713696	-1.35845
Zoff204672	ACCTCCACGCTGGGTTCTTC	TCCTCCCGCTACGCCACTAG	-1.80236	-0.0739187	1.67597	-0.0524707	-1.152	0.176323	1.33914	0.263034
Zoff262691	AGGAGGTGGATGCTGTGGT	AGACGATGGTGGCGTGCTT	4.83628	0.704674	-0.963406	3.1682	2.80735	1.10434	-1.47393	2.93168
Zoff449917	CGAAGCCTACGACAGCATTAC	CACAGGGACAACCCACAGAGT	-1.64285	1.12364	1.60695	-1.15954	-0.0740006	1.0072	1.07039	-0.915936
Zoff231158	GTGCGGTAATACTGGAGACG	AGTGCTGGTGAGATTCAAGGT	4.29834	0.803316	-2.26502	1.23	3	0.695994	-1.73697	0.9855
Zoff224398	GATAATCAAGCGTCACGACCTCAA	TGCTTCCAGTAGCCGCCGTAG	4.22315	2.46229	-1.04543	0.715432	2.73769	1.99277	-2.25154	0.765535
Zoff205848	ATTGAAGGTAAGGGAGGCTG	AATGGCAAAGAGATGGATGA	-1.14498	-0.592557	1.2256	0.673179	-0.915936	-1.39593	0.432959	0.695994
Zoff262685	CGAGCTTGGGGTCGGAAAC	TCTGGCGGCGGTGGTAAAA	4.49557	0.450384	-0.708456	3.33673	3.90689	0.799087	-0.556393	3.21723
Zoff320814	GGACAGGTAGAGCAGGACG	GCATCAAGATTGGCAAGAACG	1.22125	-0.144474	-0.376402	0.989318	0.847997	-0.168123	-0.535332	0.432959
Zoff148158	ATGTCCACCCTGTCCTTTCC	CTTCCGTTTCCTGCCCTTC	1.86674	-0.988428	-1.42412	1.43105	1.59455	-1.08927	-0.836501	1.63227
Zoff262684	CGGTGGTTGAGGTCGTTCC	TCTCCGTGTCCAGGTTTGC	4.34598	0.389947	-1.35586	2.60017	3.12102	0.669027	-0.0588937	2.48543
Zoff314421	GCGAATGTTGTATCTGTGCCT	TATTTTGCTTTCTCTGGGGG	0.337935	0.0721249	-1.78393	-1.51812	-0.0291463	0.613532	-1.32193	-1
Actin1	TGGCATCTCTCAGCACATTCC	TGCACAATGGATGGGTCAGA
