# Supplementary material for: Identification and expression profile of the soil moisture and Ralstonia solanacearum response CYPome in ginger (Zingiber officinale)
Source: PeerJ. 2021 Aug 2;9:e11755. doi: 10.7717/peerj.11755 (PMC8340902; doi:10.7717/peerj.11755)
Supplement: Supplemental Information 5 [file peerj-09-11755-s005.xlsx]

## Sheet: Sheet1
Table S5 Expression Profiling of P450 Unigenes Involved in Brassinolide, Flavonoid, Jasmonate, Gibberellin, and Gingerol Biosynthesis
	Gene	Seqid	Length	Count												Normalized expression level												Average expression level				NR-ID	NR-description	KEGG-ID	KEGG-description	KOG-ID	KOG-description	SwissProt-ID	SwissProt-description	GO-ID
				LI-1A	LI-2A	LI-3A	HI-1A	HI-2A	HI-3A	LUN-1A	LUN-2A	LUN-3A	HUN-1A	HUN-2A	HUN-3A	LI-1A_CPM	LI-2A_CPM	LI-3A_CPM	HI-1A_CPM	HI-2A_CPM	HI-3A_CPM	LUN-1A_CPM	LUN-2A_CPM	LUN-3A_CPM	HUN-1A_CPM	HUN-2A_CPM	HUN-3A_CPM	LI_mean	HI_mean	LUN_mean	HUN_mean
Brassinolide	DWF4	Zoff156322	1155	14	21	18	69	21	42	12	35	31	47	29	46	0.69	1.21	0.89	3.5	1.09	2.08	0.59	1.75	1.53	2.38	1.44	2.32	0.93	2.22333	1.29	2.04667	gi|695018141|ref|XP_009396020.1|	PREDICTED: cytochrome P450 90B1-like isoform X2 [Musa acuminata subsp. malaccensis]	rcu:RCOM_0536900	cytochrome P450, putative (EC:1.14.13.76); K09587 cytochrome P450, family 90, subfamily B, polypeptide 1 (steroid 22-alpha-hydroxylase) [EC:1.14.13.-]	At3g50660	[QI] KOG0157 Cytochrome P450 CYP4/CYP19/CYP26 subfamilies	sp|O64989|C90B1_ARATH	Cytochrome P450 90B1 OS=Arabidopsis thaliana GN=CYP90B1 PE=1 SV=2	GO:0020037 ;GO:0050597 ;GO:0005506 ;GO:0055114 ;GO:0020037 ;GO:0016705 ;GO:0005506 ;GO:0004497 ;GO:0055114
		Zoff187095	2567	499	536	480	5	12	13	183	88	115	32	157	23	24.56	30.79	23.82	0.25	0.62	0.64	9.01	4.41	5.68	1.62	7.78	1.16	26.39	0.503333	6.36667	3.52	gi|695018141|ref|XP_009396020.1|	PREDICTED: cytochrome P450 90B1-like isoform X2 [Musa acuminata subsp. malaccensis]	vvi:100241065	hypothetical protein LOC100241065; K09587 cytochrome P450, family 90, subfamily B, polypeptide 1 (steroid 22-alpha-hydroxylase) [EC:1.14.13.-]	At3g50660	[QI] KOG0157 Cytochrome P450 CYP4/CYP19/CYP26 subfamilies	sp|O64989|C90B1_ARATH	Cytochrome P450 90B1 OS=Arabidopsis thaliana GN=CYP90B1 PE=1 SV=2	GO:0016132 ;GO:0010012 ;GO:0016021 ;GO:0055114 ;GO:0009867 ;GO:0010358 ;GO:0016705 ;GO:0009055 ;GO:0016023 ;GO:0020037 ;GO:0009826 ;GO:0005506 ;GO:0005783 ;GO:0016126 ;GO:0020037 ;GO:0016705 ;GO:0004497 ;GO:0005506 ;GO:0055114 ;GO:0016132 ;GO:0010012 ;GO:0016021 ;GO:0055114 ;GO:0009867 ;GO:0010358 ;GO:0016705 ;GO:0009055 ;GO:0020037 ;GO:0009826 ;GO:0005506 ;GO:0005783 ;GO:0016126 ;GO:0020037 ;GO:…
		Zoff302378	969	29	24	16	140	38	94	20	53	47	79	38	44	1.43	1.38	0.79	7.1	1.97	4.65	0.98	2.66	2.32	3.99	1.88	2.22	1.2	4.57333	1.98667	2.69667	gi|672124557|ref|XP_008785666.1|	PREDICTED: cytochrome P450 90B1-like [Phoenix dactylifera]	osa:4332134	Os03g0227700; K09587 cytochrome P450, family 90, subfamily B, polypeptide 1 (steroid 22-alpha-hydroxylase) [EC:1.14.13.-]	At3g50660	[QI] KOG0157 Cytochrome P450 CYP4/CYP19/CYP26 subfamilies	sp|O64989|C90B1_ARATH	Cytochrome P450 90B1 OS=Arabidopsis thaliana GN=CYP90B1 PE=1 SV=2	GO:0016132 ;GO:0010012 ;GO:0016021 ;GO:0055114 ;GO:0009867 ;GO:0010358 ;GO:0016705 ;GO:0009055 ;GO:0016023 ;GO:0020037 ;GO:0009826 ;GO:0005506 ;GO:0005783 ;GO:0016126 ;GO:0016132 ;GO:0010012 ;GO:0016021 ;GO:0055114 ;GO:0009867 ;GO:0010358 ;GO:0016705 ;GO:0009055 ;GO:0016023 ;GO:0020037 ;GO:0009826 ;GO:0005506 ;GO:0005783 ;GO:0016126
		Zoff609601	1351	3	2	0	0	0	0	3	2	3	3	0	0	0.15	0.11	0	0	0	0	0.15	0.1	0.15	0.15	0	0	0.0866667	0	0.133333	0.05	gi|672124706|ref|XP_008785747.1|	PREDICTED: cytochrome P450 90B1-like [Phoenix dactylifera]	osa:4332134	Os03g0227700; K09587 cytochrome P450, family 90, subfamily B, polypeptide 1 (steroid 22-alpha-hydroxylase) [EC:1.14.13.-]	At3g50660	[QI] KOG0157 Cytochrome P450 CYP4/CYP19/CYP26 subfamilies	sp|O64989|C90B1_ARATH	Cytochrome P450 90B1 OS=Arabidopsis thaliana GN=CYP90B1 PE=1 SV=2	GO:0016132 ;GO:0004497 ;GO:0016023 ;GO:0048366 ;GO:0020037 ;GO:0016020
		Zoff609602	512	2	0	1	0	0	0	1	1	1	0	0	1	0.1	0	0.05	0	0	0	0.05	0.05	0.05	0	0	0.05	0.05	0	0.05	0.0166667	gi|571435808|ref|XP_006573584.1|	PREDICTED: cytochrome P450 90B1-like isoform X2 [Glycine max]	rcu:RCOM_0536900	cytochrome P450, putative (EC:1.14.13.76); K09587 cytochrome P450, family 90, subfamily B, polypeptide 1 (steroid 22-alpha-hydroxylase) [EC:1.14.13.-]	At3g50660	[QI] KOG0157 Cytochrome P450 CYP4/CYP19/CYP26 subfamilies	sp|O64989|C90B1_ARATH	Cytochrome P450 90B1 OS=Arabidopsis thaliana GN=CYP90B1 PE=1 SV=2	GO:0009753 ;GO:0044763 ;GO:0046872 ;GO:0016705 ;GO:0004497 ;GO:0046165 ;GO:0065007 ;GO:0048366 ;GO:0006694 ;GO:0009653 ;GO:0016020
	D11	Zoff310987	2491	184	297	992	124	82	119	125	272	194	103	166	356	9.06	17.06	49.22	6.29	4.24	5.88	6.15	13.63	9.58	5.21	8.22	17.93	25.1133	5.47	9.78667	10.4533	gi|695024614|ref|XP_009399529.1|	PREDICTED: cytochrome P450 724B1-like [Musa acuminata subsp. malaccensis]	osa:4336116	Os04g0469800; K12639 cytochrome P450, family 724, subfamily B, polypeptide 1 [EC:1.14.13.-]	At3g50660	[QI] KOG0157 Cytochrome P450 CYP4/CYP19/CYP26 subfamilies	sp|Q6F4F5|C724B_ORYSJ	Cytochrome P450 724B1 OS=Oryza sativa subsp. japonica GN=CYP724B1 PE=1 SV=1	GO:0016132 ;GO:0008199 ;GO:0010012 ;GO:0016021 ;GO:0055114 ;GO:0009647 ;GO:0016705 ;GO:0009055 ;GO:0006879 ;GO:0016023 ;GO:0006826 ;GO:0020037 ;GO:0016132 ;GO:0046872 ;GO:0009647 ;GO:0004497 ;GO:0016023 ;GO:0016020 ;GO:0016132 ;GO:0046872 ;GO:0009647 ;GO:0004497 ;GO:0016023 ;GO:0020037 ;GO:0016020 ;GO:0016021 ;GO:0008152 ;GO:0016758
		Zoff310988	2981	118	128	305	332	222	244	224	210	204	209	234	280	5.81	7.35	15.13	16.84	11.48	12.06	11.02	10.52	10.07	10.57	11.59	14.1	9.43	13.46	10.5367	12.0867	gi|695024614|ref|XP_009399529.1|	PREDICTED: cytochrome P450 724B1-like [Musa acuminata subsp. malaccensis]	zma:100217085	hypothetical protein LOC100217085; K12639 cytochrome P450, family 724, subfamily B, polypeptide 1 [EC:1.14.13.-]	At5g14400	[QI] KOG0157 Cytochrome P450 CYP4/CYP19/CYP26 subfamilies	sp|Q6F4F5|C724B_ORYSJ	Cytochrome P450 724B1 OS=Oryza sativa subsp. japonica GN=CYP724B1 PE=1 SV=1	GO:0016132 ;GO:0009647 ;GO:0004497 ;GO:0016023 ;GO:0020037 ;GO:0005506 ;GO:0016020 ;GO:0016132 ;GO:0009647 ;GO:0004497 ;GO:0016023 ;GO:0020037 ;GO:0005506 ;GO:0016020 ;GO:0016132 ;GO:0009055 ;GO:0005506 ;GO:0020037 ;GO:0055114 ;GO:0010012 ;GO:0050598 ;GO:0016132 ;GO:0008199 ;GO:0010012 ;GO:0016021 ;GO:0055114 ;GO:0009647 ;GO:0016705 ;GO:0009055 ;GO:0006879 ;GO:0016023 ;GO:0006826 ;GO:0020037 ;GO:…
	CPD	Zoff228248	2702	373	238	251	1386	1087	1074	367	424	415	478	992	903	18.36	13.67	12.45	70.31	56.21	53.1	18.06	21.24	20.49	24.17	49.13	45.47	14.8267	59.8733	19.93	39.59	gi|695009842|ref|XP_009391571.1|	PREDICTED: cytochrome P450 90A1 isoform X1 [Musa acuminata subsp. malaccensis]	osa:4351461	Os12g0139300; K09588 cytochrome P450, family 90, subfamily A, polypeptide 1 [EC:1.14.-.-]	At5g05690	[QI] KOG0157 Cytochrome P450 CYP4/CYP19/CYP26 subfamilies	sp|Q42569|C90A1_ARATH	Cytochrome P450 90A1 OS=Arabidopsis thaliana GN=CYP90A1 PE=2 SV=1	GO:0009908 ;GO:0032989 ;GO:0016020 ;GO:0016023 ;GO:0060560 ;GO:0045229 ;GO:0020037 ;GO:1901576 ;GO:0009411 ;GO:0048513 ;GO:0016705 ;GO:0004497 ;GO:0010817 ;GO:0005506 ;GO:0044711 ;GO:0044238 ;GO:0030154 ;GO:0055114 ;GO:0016049 ;GO:0048646 ;GO:0009908 ;GO:0032989 ;GO:0016020 ;GO:0016023 ;GO:0060560 ;GO:0045229 ;GO:0020037 ;GO:1901576 ;GO:0009411 ;GO:0048513 ;GO:0016705 ;GO:0004497 ;GO:0010817 ;GO:…
	CYP90D2	Zoff090584	362	4	2	0	0	0	2	4	6	3	4	0	0	0.2	0.11	0	0	0	0.1	0.2	0.3	0.15	0.2	0	0	0.103333	0.0333333	0.216667	0.0666667	gi|356526027|ref|XP_003531621.1|	PREDICTED: 3-epi-6-deoxocathasterone 23-monooxygenase isoform X1 [Glycine max]	pop:POPTR_703918	CYP90D5; cytochrome P450 probable 6-deoxoteasterone to 3-dehydro 6-deoxoteasterone or teasterone to 3-dehydro teasterone	At4g36380	[QI] KOG0157 Cytochrome P450 CYP4/CYP19/CYP26 subfamilies	sp|Q94IW5|C90D2_ORYSJ	Cytochrome P450 90D2 OS=Oryza sativa subsp. japonica GN=CYP90D2 PE=1 SV=1	GO:0016132 ;GO:0016021 ;GO:0022900 ;GO:0009055 ;GO:0048441 ;GO:0048443 ;GO:0048366 ;GO:0020037 ;GO:0016709 ;GO:0005789 ;GO:0005506
		Zoff142632	2344	44	32	52	14	19	25	98	105	85	47	28	36	2.17	1.84	2.58	0.71	0.98	1.24	4.82	5.26	4.2	2.38	1.39	1.81	2.19667	0.976667	4.76	1.86	gi|695068468|ref|XP_009381179.1|	PREDICTED: cytochrome P450 90D2-like isoform X3 [Musa acuminata subsp. malaccensis]	pop:POPTR_703918	CYP90D5; cytochrome P450 probable 6-deoxoteasterone to 3-dehydro 6-deoxoteasterone or teasterone to 3-dehydro teasterone	At3g13730	[QI] KOG0157 Cytochrome P450 CYP4/CYP19/CYP26 subfamilies	sp|Q94IW5|C90D2_ORYSJ	Cytochrome P450 90D2 OS=Oryza sativa subsp. japonica GN=CYP90D2 PE=1 SV=1	GO:0016132 ;GO:0016021 ;GO:0055114 ;GO:0009055 ;GO:0048441 ;GO:0048443 ;GO:0048366 ;GO:0020037 ;GO:0016709 ;GO:0005789 ;GO:0005506 ;GO:0016132 ;GO:0016021 ;GO:0055114 ;GO:0009055 ;GO:0048441 ;GO:0048443 ;GO:0048366 ;GO:0020037 ;GO:0016709 ;GO:0005789 ;GO:0005506 ;GO:0016132 ;GO:0016021 ;GO:0022900 ;GO:0009055 ;GO:0048441 ;GO:0048443 ;GO:0048366 ;GO:0020037 ;GO:0016709 ;GO:0005789 ;GO:0005506 ;GO:…
		Zoff292337	2116	125	121	38	87	139	88	56	95	56	97	161	86	6.15	6.95	1.89	4.41	7.19	4.35	2.76	4.76	2.76	4.91	7.97	4.33	4.99667	5.31667	3.42667	5.73667	gi|695068464|ref|XP_009381177.1|	PREDICTED: cytochrome P450 90D2-like isoform X1 [Musa acuminata subsp. malaccensis]	sbi:SORBI_03g002870	hypothetical protein	At3g13730	[QI] KOG0157 Cytochrome P450 CYP4/CYP19/CYP26 subfamilies	sp|Q94IW5|C90D2_ORYSJ	Cytochrome P450 90D2 OS=Oryza sativa subsp. japonica GN=CYP90D2 PE=1 SV=1	GO:0016132 ;GO:0016021 ;GO:0055114 ;GO:0009055 ;GO:0048441 ;GO:0048443 ;GO:0048366 ;GO:0020037 ;GO:0016709 ;GO:0005789 ;GO:0005506 ;GO:0016132 ;GO:0016021 ;GO:0055114 ;GO:0009055 ;GO:0048441 ;GO:0048443 ;GO:0048366 ;GO:0020037 ;GO:0016709 ;GO:0005789 ;GO:0005506 ;GO:0016132 ;GO:0016021 ;GO:0055114 ;GO:0009055 ;GO:0048441 ;GO:0048443 ;GO:0048366 ;GO:0020037 ;GO:0016709 ;GO:0005789 ;GO:0005506 ;GO:…
		Zoff292338	2350	287	252	229	138	215	199	248	423	332	228	309	252	14.13	14.47	11.36	7	11.12	9.84	12.2	21.19	16.39	11.53	15.3	12.69	13.32	9.32	16.5933	13.1733	gi|695068468|ref|XP_009381179.1|	PREDICTED: cytochrome P450 90D2-like isoform X3 [Musa acuminata subsp. malaccensis]	sbi:SORBI_03g002870	hypothetical protein	At3g13730	[QI] KOG0157 Cytochrome P450 CYP4/CYP19/CYP26 subfamilies	sp|Q94IW5|C90D2_ORYSJ	Cytochrome P450 90D2 OS=Oryza sativa subsp. japonica GN=CYP90D2 PE=1 SV=1	GO:0016132 ;GO:0016021 ;GO:0055114 ;GO:0009055 ;GO:0048441 ;GO:0048443 ;GO:0048366 ;GO:0020037 ;GO:0016709 ;GO:0005789 ;GO:0005506 ;GO:0016132 ;GO:0016021 ;GO:0022900 ;GO:0009055 ;GO:0048441 ;GO:0048443 ;GO:0048366 ;GO:0020037 ;GO:0016709 ;GO:0005789 ;GO:0005506
		Zoff292339	897	36	42	37	11	26	24	42	62	54	33	57	37	1.77	2.41	1.84	0.56	1.34	1.19	2.07	3.11	2.67	1.67	2.82	1.86	2.00667	1.03	2.61667	2.11667	gi|695042525|ref|XP_009408921.1|	PREDICTED: cytochrome P450 90D2-like [Musa acuminata subsp. malaccensis]	osa:4327329	Os01g0197100; K09589 cytochrome P450, family 90, subfamily D, polypeptide 2 (steroid 3-oxidase) [EC:1.14.-.-]	At3g13730	[QI] KOG0157 Cytochrome P450 CYP4/CYP19/CYP26 subfamilies	sp|Q94IW5|C90D2_ORYSJ	Cytochrome P450 90D2 OS=Oryza sativa subsp. japonica GN=CYP90D2 PE=1 SV=1	GO:0016132 ;GO:0004497 ;GO:0005506 ;GO:0020037 ;GO:0016705 ;GO:0016021 ;GO:0022900
	BR6OX1	Zoff231158	2477	114	82	204	3215	1804	2949	454	59	210	465	565	639	5.61	4.71	10.12	163.09	93.29	145.79	22.34	2.96	10.37	23.51	27.98	32.18	6.81333	134.057	11.89	27.89	gi|695030700|ref|XP_009402829.1|	PREDICTED: cytochrome P450 85A1-like [Musa acuminata subsp. malaccensis]	osa:4333399	Os03g0602300	At5g38970	[QI] KOG0157 Cytochrome P450 CYP4/CYP19/CYP26 subfamilies	sp|Q8GSQ1|C85A1_ORYSJ	Cytochrome P450 85A1 OS=Oryza sativa subsp. japonica GN=CYP85A1 PE=1 SV=1	GO:0016132 ;GO:0016021 ;GO:0022900 ;GO:0001578 ;GO:0010268 ;GO:0009647 ;GO:0016705 ;GO:0004497 ;GO:0020037 ;GO:0005506 ;GO:0020037 ;GO:0016705 ;GO:0004497 ;GO:0005506 ;GO:0055114 ;GO:0016132 ;GO:0016021 ;GO:0022900 ;GO:0001578 ;GO:0010268 ;GO:0009647 ;GO:0016705 ;GO:0004497 ;GO:0020037 ;GO:0005506 ;GO:0016132 ;GO:0016021 ;GO:0022900 ;GO:0001578 ;GO:0010268 ;GO:0009647 ;GO:0016705 ;GO:0004497 ;GO:…
	BAS1	Zoff283771	5246	1004	963	1214	673	532	554	702	898	816	960	628	723	49.41	55.31	60.24	34.14	27.51	27.39	34.55	44.99	40.28	48.55	31.1	36.41	54.9867	29.68	39.94	38.6867	gi|695014288|ref|XP_009393959.1|	PREDICTED: cytokinin hydroxylase-like [Musa acuminata subsp. malaccensis]	pop:POPTR_575832	CYP715A3; cytochrome P450	At5g52400	[QI] KOG0157 Cytochrome P450 CYP4/CYP19/CYP26 subfamilies	sp|O48786|C734A_ARATH	Cytochrome P450 734A1 OS=Arabidopsis thaliana GN=CYP734A1 PE=2 SV=1	GO:0055085 ;GO:0016021 ;GO:0016021 ;GO:0016023 ;GO:0055085 ;GO:0055085 ;GO:0016021 ;GO:0055085 ;GO:0016021 ;GO:0055085 ;GO:0016021 ;GO:0016021 ;GO:0016023 ;GO:0055085 ;GO:0055085 ;GO:0016021 ;GO:0016021 ;GO:0016023 ;GO:0055085 ;GO:0016021 ;GO:0016023 ;GO:0055085 ;GO:0016021 ;GO:0016023 ;GO:0055085 ;GO:0046872 ;GO:0016491 ;GO:0016023 ;GO:0016021 ;GO:0016023 ;GO:0055085 ;GO:0016021 ;GO:0016023 ;GO:…
		Zoff603371	337	0	0	2	0	0	0	0	0	0	0	0	1	0	0	0.1	0	0	0	0	0	0	0	0	0.05	0.0333333	0	0	0.0166667	gi|695014288|ref|XP_009393959.1|	PREDICTED: cytokinin hydroxylase-like [Musa acuminata subsp. malaccensis]	pop:POPTR_575832	CYP715A3; cytochrome P450	At5g52400	[QI] KOG0157 Cytochrome P450 CYP4/CYP19/CYP26 subfamilies	sp|O48786|C734A_ARATH	Cytochrome P450 734A1 OS=Arabidopsis thaliana GN=CYP734A1 PE=2 SV=1	GO:0046872 ;GO:0016491 ;GO:0016023
Flavonoid	F3'H	Zoff107087	948	12	10	7	12	8	13	10	48	6	4	3	28	0.59	0.57	0.35	0.61	0.41	0.64	0.49	2.41	0.3	0.2	0.15	1.41	0.503333	0.553333	1.06667	0.586667	gi|695014951|ref|XP_009394321.1|	PREDICTED: flavonoid 3'-monooxygenase [Musa acuminata subsp. malaccensis]	osa:4348304	Os10g0320100; K05280 flavonoid 3'-monooxygenase [EC:1.14.13.21]	At5g07990	[Q] KOG0156 Cytochrome P450 CYP2 subfamily	sp|Q9SD85|F3PH_ARATH	Flavonoid 3'-monooxygenase OS=Arabidopsis thaliana GN=CYP75B1 PE=1 SV=1	GO:0009744 ;GO:0010224 ;GO:0016711 ;GO:0009718 ;GO:0005506 ;GO:0020037 ;GO:0005576 ;GO:0019825 ;GO:0009733 ;GO:0055114
		Zoff449917	2552	1380	1332	927	141	778	275	2700	3802	1855	877	1524	1309	67.92	76.51	46	7.15	40.23	13.6	132.87	190.5	91.57	44.35	75.48	65.92	63.4767	20.3267	138.313	61.9167	gi|695014951|ref|XP_009394321.1|	PREDICTED: flavonoid 3'-monooxygenase [Musa acuminata subsp. malaccensis]	osa:4348304	Os10g0320100; K05280 flavonoid 3'-monooxygenase [EC:1.14.13.21]	At5g07990	[Q] KOG0156 Cytochrome P450 CYP2 subfamily	sp|Q9SD85|F3PH_ARATH	Flavonoid 3'-monooxygenase OS=Arabidopsis thaliana GN=CYP75B1 PE=1 SV=1	GO:0020037 ;GO:0005506 ;GO:0016711 ;GO:0055114
		Zoff152048	1054	20	38	27	18	23	23	42	82	10	13	6	50	0.98	2.18	1.34	0.91	1.19	1.14	2.07	4.11	0.49	0.66	0.3	2.52	1.5	1.08	2.22333	1.16	gi|695014951|ref|XP_009394321.1|	PREDICTED: flavonoid 3'-monooxygenase [Musa acuminata subsp. malaccensis]	vvi:100263810	hypothetical protein; K05280 flavonoid 3'-monooxygenase [EC:1.14.13.21]	At5g07990	[Q] KOG0156 Cytochrome P450 CYP2 subfamily	sp|Q9SBQ9|F3PH_PETHY	Flavonoid 3'-monooxygenase OS=Petunia hybrida GN=CYP75B2 PE=2 SV=1	GO:0046872 ;GO:0016705 ;GO:0004497 ;GO:0009813 ;GO:0004497 ;GO:0005506 ;GO:0020037 ;GO:0016705 ;GO:0005783 ;GO:0044425 ;GO:0055114 ;GO:0009411
		Zoff042846	336	0	0	0	0	0	0	0	0	0	0	0	3	0	0	0	0	0	0	0	0	0	0	0	0.15	0	0	0	0.05	gi|661886531|emb|CDP09895.1|	unnamed protein product [Coffea canephora]	rcu:RCOM_1679920	cytochrome P450, putative (EC:1.14.13.88)	At4g12330	[Q] KOG0156 Cytochrome P450 CYP2 subfamily	sp|Q9SBQ9|F3PH_PETHY	Flavonoid 3'-monooxygenase OS=Petunia hybrida GN=CYP75B2 PE=2 SV=1	GO:0020037 ;GO:0016705 ;GO:0004497 ;GO:0005506 ;GO:0055114
		Zoff042847	336	5	0	8	2	3	4	4	5	4	1	4	1	0.25	0	0.4	0.1	0.16	0.2	0.2	0.25	0.2	0.05	0.2	0.05	0.216667	0.153333	0.216667	0.1	gi|661888205|emb|CDP08322.1|	unnamed protein product [Coffea canephora]	rcu:RCOM_1679920	cytochrome P450, putative (EC:1.14.13.88)	At4g12330	[Q] KOG0156 Cytochrome P450 CYP2 subfamily	sp|Q9SBQ9|F3PH_PETHY	Flavonoid 3'-monooxygenase OS=Petunia hybrida GN=CYP75B2 PE=2 SV=1	GO:0020037 ;GO:0033772 ;GO:0005506 ;GO:0055114
		Zoff042848	336	3	1	1	0	3	0	1	2	1	2	4	4	0.15	0.06	0.05	0	0.16	0	0.05	0.1	0.05	0.1	0.2	0.2	0.0866667	0.0533333	0.0666667	0.166667	gi|661886531|emb|CDP09895.1|	unnamed protein product [Coffea canephora]	rcu:RCOM_1679920	cytochrome P450, putative (EC:1.14.13.88)	At4g12330	[Q] KOG0156 Cytochrome P450 CYP2 subfamily	sp|Q9SBQ9|F3PH_PETHY	Flavonoid 3'-monooxygenase OS=Petunia hybrida GN=CYP75B2 PE=2 SV=1	GO:0020037 ;GO:0016705 ;GO:0004497 ;GO:0005506 ;GO:0055114
		Zoff225809	1808	257	205	257	335	441	374	323	345	290	352	372	278	12.65	11.78	12.75	16.99	22.81	18.49	15.9	17.29	14.31	17.8	18.42	14	12.3933	19.43	15.8333	16.74	gi|672201200|ref|XP_008778075.1|	PREDICTED: LOW QUALITY PROTEIN: geraniol 8-hydroxylase-like [Phoenix dactylifera]	sbi:SORBI_07g024990	hypothetical protein	At4g12320	[Q] KOG0156 Cytochrome P450 CYP2 subfamily	sp|Q9SBQ9|F3PH_PETHY	Flavonoid 3'-monooxygenase OS=Petunia hybrida GN=CYP75B2 PE=2 SV=1	GO:0020037 ;GO:0016705 ;GO:0004497 ;GO:0005506 ;GO:0055114 ;GO:0020037 ;GO:0016705 ;GO:0004497 ;GO:0005506 ;GO:0055114 ;GO:0020037 ;GO:0016705 ;GO:0004497 ;GO:0005506 ;GO:0055114 ;GO:0020037 ;GO:0016705 ;GO:0004497 ;GO:0005506 ;GO:0055114 ;GO:0020037 ;GO:0016705 ;GO:0004497 ;GO:0005506 ;GO:0055114 ;GO:0020037 ;GO:0016705 ;GO:0004497 ;GO:0005506 ;GO:0055114 ;GO:0020037 ;GO:0016705 ;GO:0004497 ;GO:…
		Zoff294948	1809	4443	4720	3505	3532	4367	2480	16482	28759	33969	4895	5181	3697	218.67	271.11	173.91	179.17	225.83	122.61	811.1	1440.96	1676.77	247.54	256.6	186.18	221.23	175.87	1309.61	230.107	gi|695027919|ref|XP_009401319.1|	PREDICTED: cytochrome P450 71A1-like [Musa acuminata subsp. malaccensis]	osa:4347176	Os09g0441400	At5g07990	[Q] KOG0156 Cytochrome P450 CYP2 subfamily	sp|Q9SD85|F3PH_ARATH	Flavonoid 3'-monooxygenase OS=Arabidopsis thaliana GN=CYP75B1 PE=1 SV=1	GO:0020037 ;GO:0016705 ;GO:0004497 ;GO:0005506 ;GO:0055114 ;GO:0020037 ;GO:0016705 ;GO:0004497 ;GO:0005506 ;GO:0055114 ;GO:0020037 ;GO:0016705 ;GO:0004497 ;GO:0005506 ;GO:0055114 ;GO:0020037 ;GO:0016705 ;GO:0004497 ;GO:0005506 ;GO:0055114
		Zoff305282	530	47.36	5.15	12.04	28.48	17.93	33.17	19.65	29.23	13.49	4.99	10.74	20.73	2.33	0.3	0.6	1.44	0.93	1.64	0.97	1.46	0.67	0.25	0.53	1.04	1.07667	1.33667	1.03333	0.606667	gi|703114726|ref|XP_010100729.1|	Flavonoid 3'-monooxygenase [Morus notabilis]	zma:100282873	pco115177; LOC100282873	At1g01280	[Q] KOG0156 Cytochrome P450 CYP2 subfamily	sp|Q9LNJ4|C70A2_ARATH	Cytochrome P450 703A2 OS=Arabidopsis thaliana GN=CYP703A2 PE=2 SV=1	GO:0046872 ;GO:0051791 ;GO:0044249 ;GO:0010584 ;GO:0016709
		Zoff305284	530	7.11	6.37	0	53.59	42.55	45.64	15.7	7.16	2.69	11.32	5.61	31.41	0.35	0.37	0	2.72	2.2	2.26	0.77	0.36	0.13	0.57	0.28	1.58	0.24	2.39333	0.42	0.81	gi|703114726|ref|XP_010100729.1|	Flavonoid 3'-monooxygenase [Morus notabilis]	zma:100282873	pco115177; LOC100282873	At1g01280	[Q] KOG0156 Cytochrome P450 CYP2 subfamily	sp|Q9LNJ4|C70A2_ARATH	Cytochrome P450 703A2 OS=Arabidopsis thaliana GN=CYP703A2 PE=2 SV=1	GO:0046872 ;GO:0051791 ;GO:0044249 ;GO:0010584 ;GO:0016709
		Zoff305288	1314	653.58	572.71	390.04	333.09	419.81	372.8	256.16	859.06	276.48	205.56	343.9	367.05	32.17	32.9	19.35	16.9	21.71	18.43	12.61	43.04	13.65	10.39	17.03	18.48	28.14	19.0133	23.1	15.3	gi|703114726|ref|XP_010100729.1|	Flavonoid 3'-monooxygenase [Morus notabilis]	zma:100282873	pco115177; LOC100282873	At1g01280	[Q] KOG0156 Cytochrome P450 CYP2 subfamily	sp|Q9LNJ4|C70A2_ARATH	Cytochrome P450 703A2 OS=Arabidopsis thaliana GN=CYP703A2 PE=2 SV=1	GO:0046872 ;GO:0051791 ;GO:0044249 ;GO:0010584 ;GO:0016709 ;GO:0046872 ;GO:0051791 ;GO:0044249 ;GO:0010584 ;GO:0016709 ;GO:0046872 ;GO:0051791 ;GO:0044249 ;GO:0010584 ;GO:0016709 ;GO:0046872 ;GO:0051791 ;GO:0044249 ;GO:0010584 ;GO:0016709 ;GO:0046872 ;GO:0051791 ;GO:0044249 ;GO:0010584 ;GO:0016709 ;GO:0055114 ;GO:0005739 ;GO:0080110 ;GO:0009055 ;GO:0051792 ;GO:0020037 ;GO:0016709 ;GO:0005506
		Zoff110807	481	0	0	0	0	1	2	0	0	0	0	0	0	0	0	0	0	0.05	0.1	0	0	0	0	0	0	0	0.05	0	0	gi|326514526|dbj|BAJ96250.1|	predicted protein [Hordeum vulgare subsp. vulgare]	zma:100281181	flavonoid 3-monooxygenase	At4g12310	[Q] KOG0156 Cytochrome P450 CYP2 subfamily	sp|O81973|C93A3_SOYBN	Cytochrome P450 93A3 OS=Glycine max GN=CYP93A3 PE=2 SV=1	GO:0020037 ;GO:0016705 ;GO:0004497 ;GO:0005506 ;GO:0055114
	F3'5'H	Zoff135396	1728	221	182	181	22	47	57	77	195	129	43	50	75	10.88	10.45	8.98	1.12	2.43	2.82	3.79	9.77	6.37	2.17	2.48	3.78	10.1033	2.12333	6.64333	2.81	gi|695048565|ref|XP_009412197.1|	PREDICTED: flavonoid 3',5'-hydroxylase 1-like [Musa acuminata subsp. malaccensis]	sbi:SORBI_01g034460	hypothetical protein; K13083 cytochrome P450, family 75, subfamily A (flavonoid 3',5'-hydroxylase) [EC:1.14.13.88]	At5g07990	[Q] KOG0156 Cytochrome P450 CYP2 subfamily	sp|P48418|C75A1_PETHY	Flavonoid 3',5'-hydroxylase 1 OS=Petunia hybrida GN=CYP75A1 PE=2 SV=1	GO:0046872 ;GO:0016491 ;GO:0020037 ;GO:0016705 ;GO:0005506 ;GO:0055114
		Zoff174271	1601	37	21.21	5.58	2	10.23	11	19	120	8.6	2.87	3	18	1.82	1.22	0.28	0.1	0.53	0.54	0.94	6.01	0.42	0.15	0.15	0.91	1.10667	0.39	2.45667	0.403333	gi|695047937|ref|XP_009411862.1|	PREDICTED: flavonoid 3',5'-hydroxylase 1-like [Musa acuminata subsp. malaccensis]	pop:POPTR_54623	CYP75A12, F3'5'H1; flavonoid 3',5'-hydroxylase (EC:1.14.13.88); K13083 cytochrome P450, family 75, subfamily A (flavonoid 3',5'-hydroxylase) [EC:1.14.13.88]	At5g07990	[Q] KOG0156 Cytochrome P450 CYP2 subfamily	sp|P48418|C75A1_PETHY	Flavonoid 3',5'-hydroxylase 1 OS=Petunia hybrida GN=CYP75A1 PE=2 SV=1	GO:0020037 ;GO:0016705 ;GO:0004497 ;GO:0005506 ;GO:0055114
		Zoff174272	678	0	1.79	0.42	0	7.77	0	0	0	1.4	4.13	0	0	0	0.1	0.02	0	0.4	0	0	0	0.07	0.21	0	0	0.04	0.133333	0.0233333	0.07	gi|695047937|ref|XP_009411862.1|	PREDICTED: flavonoid 3',5'-hydroxylase 1-like [Musa acuminata subsp. malaccensis]	vvi:100267840	similar to flavonoid 35 hydroxylase	At5g07990	[Q] KOG0156 Cytochrome P450 CYP2 subfamily	sp|P48418|C75A1_PETHY	Flavonoid 3',5'-hydroxylase 1 OS=Petunia hybrida GN=CYP75A1 PE=2 SV=1	GO:0020037 ;GO:0033772 ;GO:0005506 ;GO:0055114
		Zoff218902	2061	339	272	628	409	350	190	311	287	245	517	207	445	16.68	15.62	31.16	20.75	18.1	9.39	15.3	14.38	12.09	26.14	10.25	22.41	21.1533	16.08	13.9233	19.6	gi|695048565|ref|XP_009412197.1|	PREDICTED: flavonoid 3',5'-hydroxylase 1-like [Musa acuminata subsp. malaccensis]	pop:POPTR_64620	CYP75A13; cytochrome P450 flavonoid 3',5'-hydroxylase (EC:1.14.13.88); K13083 cytochrome P450, family 75, subfamily A (flavonoid 3',5'-hydroxylase) [EC:1.14.13.88]	At5g07990	[Q] KOG0156 Cytochrome P450 CYP2 subfamily	sp|P48418|C75A1_PETHY	Flavonoid 3',5'-hydroxylase 1 OS=Petunia hybrida GN=CYP75A1 PE=2 SV=1	GO:0046872 ;GO:0016491 ;GO:0046872 ;GO:0016491
		Zoff312190	517	305	165	83	66	88	65	98	501	124	43	60	63	15.01	9.48	4.12	3.35	4.55	3.21	4.82	25.1	6.12	2.17	2.97	3.17	9.53667	3.70333	12.0133	2.77	gi|695059104|ref|XP_009417895.1|	PREDICTED: flavonoid 3',5'-hydroxylase 1-like [Musa acuminata subsp. malaccensis]	pop:POPTR_54623	CYP75A12, F3'5'H1; flavonoid 3',5'-hydroxylase (EC:1.14.13.88); K13083 cytochrome P450, family 75, subfamily A (flavonoid 3',5'-hydroxylase) [EC:1.14.13.88]	At5g07990	[Q] KOG0156 Cytochrome P450 CYP2 subfamily	sp|O04773|C75A6_CAMME	Flavonoid 3',5'-hydroxylase OS=Campanula medium GN=CYP75A6 PE=2 SV=1	GO:0016491 ;GO:0005488 ;GO:0016491 ;GO:0005488 ;GO:0016491 ;GO:0005488 ;GO:0016491 ;GO:0005488
		Zoff312194	370	138.57	62.12	21	15	41.71	14	22.05	136.47	31.98	14	14	19.99	6.82	3.57	1.04	0.76	2.16	0.69	1.09	6.84	1.58	0.71	0.69	1.01	3.81	1.20333	3.17	0.803333	gi|695059104|ref|XP_009417895.1|	PREDICTED: flavonoid 3',5'-hydroxylase 1-like [Musa acuminata subsp. malaccensis]	zma:100278079	hypothetical protein LOC100278079	At5g07990	[Q] KOG0156 Cytochrome P450 CYP2 subfamily	sp|P48418|C75A1_PETHY	Flavonoid 3',5'-hydroxylase 1 OS=Petunia hybrida GN=CYP75A1 PE=2 SV=1	GO:0020037 ;GO:0016705 ;GO:0004497 ;GO:0005506 ;GO:0055114
		Zoff312200	410	38.04	24.12	6.39	6.02	10.46	8.01	9.79	72.31	11.21	5	8	8.56	1.87	1.39	0.32	0.31	0.54	0.4	0.48	3.62	0.55	0.25	0.4	0.43	1.19333	0.416667	1.55	0.36	gi|695059104|ref|XP_009417895.1|	PREDICTED: flavonoid 3',5'-hydroxylase 1-like [Musa acuminata subsp. malaccensis]	sbi:SORBI_01g034460	hypothetical protein; K13083 cytochrome P450, family 75, subfamily A (flavonoid 3',5'-hydroxylase) [EC:1.14.13.88]	At5g07990	[Q] KOG0156 Cytochrome P450 CYP2 subfamily	sp|O04790|C75A7_EUSER	Flavonoid 3',5'-hydroxylase OS=Eustoma exaltatum subsp. russellianum GN=CYP75A7 PE=2 SV=1	GO:0046872 ;GO:0016491 ;GO:0009536
		Zoff312201	375	21.91	12.89	14.04	7	9.54	2	11.64	19.42	5.79	7.06	1	11.44	1.08	0.74	0.7	0.36	0.49	0.1	0.57	0.97	0.29	0.36	0.05	0.58	0.84	0.316667	0.61	0.33	gi|695059104|ref|XP_009417895.1|	PREDICTED: flavonoid 3',5'-hydroxylase 1-like [Musa acuminata subsp. malaccensis]	sbi:SORBI_01g034460	hypothetical protein; K13083 cytochrome P450, family 75, subfamily A (flavonoid 3',5'-hydroxylase) [EC:1.14.13.88]	At5g07990	[Q] KOG0156 Cytochrome P450 CYP2 subfamily	sp|O04790|C75A7_EUSER	Flavonoid 3',5'-hydroxylase OS=Eustoma exaltatum subsp. russellianum GN=CYP75A7 PE=2 SV=1	GO:0046872 ;GO:0016491 ;GO:0009536
		Zoff312209	348	7.77	5	2.2	0	3	3	6.68	23.27	0	5	4	4	0.38	0.29	0.11	0	0.16	0.15	0.33	1.17	0	0.25	0.2	0.2	0.26	0.103333	0.5	0.216667	gi|695059104|ref|XP_009417895.1|	PREDICTED: flavonoid 3',5'-hydroxylase 1-like [Musa acuminata subsp. malaccensis]	sbi:SORBI_01g034460	hypothetical protein; K13083 cytochrome P450, family 75, subfamily A (flavonoid 3',5'-hydroxylase) [EC:1.14.13.88]	At5g07990	[Q] KOG0156 Cytochrome P450 CYP2 subfamily	sp|O04790|C75A7_EUSER	Flavonoid 3',5'-hydroxylase OS=Eustoma exaltatum subsp. russellianum GN=CYP75A7 PE=2 SV=1	GO:0016491 ;GO:0005488 ;GO:0009536
		Zoff312214	804	362.47	245	142	94.26	140	68	114	618.51	132.97	60	64	90	17.84	14.07	7.05	4.78	7.24	3.36	5.61	30.99	6.56	3.03	3.17	4.53	12.9867	5.12667	14.3867	3.57667	gi|695059104|ref|XP_009417895.1|	PREDICTED: flavonoid 3',5'-hydroxylase 1-like [Musa acuminata subsp. malaccensis]	zma:100278079	hypothetical protein LOC100278079	At5g07990	[Q] KOG0156 Cytochrome P450 CYP2 subfamily	sp|P48418|C75A1_PETHY	Flavonoid 3',5'-hydroxylase 1 OS=Petunia hybrida GN=CYP75A1 PE=2 SV=1	GO:0009813 ;GO:0046872 ;GO:0004497 ;GO:0016705 ;GO:0044710 ;GO:0005783 ;GO:0044425 ;GO:0009411 ;GO:0046872 ;GO:0016491 ;GO:0046872 ;GO:0016491 ;GO:0046872 ;GO:0016491 ;GO:0046872 ;GO:0016491
	I2'H	Zoff237411	2787	1299	1155	2107	1256	1034	1204	1212	1202	1253	3391	1053	1171	63.93	66.34	104.54	63.71	53.47	59.52	59.64	60.23	61.85	171.48	52.15	58.97	78.27	58.9	60.5733	94.2	gi|695066409|ref|XP_009380096.1|	PREDICTED: isoflavone 2'-hydroxylase-like [Musa acuminata subsp. malaccensis]	vvi:100267741	hypothetical protein LOC100267741	At5g10600	[Q] KOG0156 Cytochrome P450 CYP2 subfamily	sp|P93147|C81E1_GLYEC	Isoflavone 2'-hydroxylase OS=Glycyrrhiza echinata GN=CYP81E1 PE=1 SV=2	GO:0016491 ;GO:0008152
		Zoff276674	2542	1082	865	898	755	926	705	1385	1661	1290	1190	994	876	53.25	49.68	44.56	38.3	47.89	34.85	68.16	83.22	63.68	60.18	49.23	44.12	49.1633	40.3467	71.6867	51.1767	gi|695039137|ref|XP_009407093.1|	PREDICTED: isoflavone 2'-hydroxylase-like [Musa acuminata subsp. malaccensis]	rcu:RCOM_1588370	cytochrome P450, putative (EC:1.14.13.89)	At2g23190	[Q] KOG0156 Cytochrome P450 CYP2 subfamily	sp|Q6WNQ8|C81E8_MEDTR	Cytochrome P450 81E8 OS=Medicago truncatula GN=CYP81E8 PE=2 SV=1	GO:0046872 ;GO:0016705 ;GO:0004497 ;GO:0016491 ;GO:0005488 ;GO:0046872 ;GO:0016705 ;GO:0004497
		Zoff285553	2682	68	59	78	24	50	24	49	106	91	174	18	28	3.35	3.39	3.87	1.22	2.59	1.19	2.41	5.31	4.49	8.8	0.89	1.41	3.53667	1.66667	4.07	3.7	gi|672185696|ref|XP_008812889.1|	PREDICTED: isoflavone 2'-hydroxylase-like [Phoenix dactylifera]	vvi:100267741	hypothetical protein LOC100267741	At4g37330	[Q] KOG0156 Cytochrome P450 CYP2 subfamily	sp|P93147|C81E1_GLYEC	Isoflavone 2'-hydroxylase OS=Glycyrrhiza echinata GN=CYP81E1 PE=1 SV=2	GO:0016491 ;GO:0016491 ;GO:0046872 ;GO:0016491
		Zoff295921	2092	269	229	257	310	481	311	247	190	203	194	531	247	13.24	13.15	12.75	15.73	24.87	15.38	12.16	9.52	10.02	9.81	26.3	12.44	13.0467	18.66	10.5667	16.1833	gi|695066409|ref|XP_009380096.1|	PREDICTED: isoflavone 2'-hydroxylase-like [Musa acuminata subsp. malaccensis]	vvi:100267741	hypothetical protein LOC100267741	At4g37330	[Q] KOG0156 Cytochrome P450 CYP2 subfamily	sp|Q6WNQ8|C81E8_MEDTR	Cytochrome P450 81E8 OS=Medicago truncatula GN=CYP81E8 PE=2 SV=1	GO:0016491 ;GO:0005488 ;GO:0046872 ;GO:0016491 ;GO:0016491 ;GO:0005488 ;GO:0016491 ;GO:0005488 ;GO:0020037 ;GO:0016705 ;GO:0004497 ;GO:0005506 ;GO:0055114 ;GO:0046872 ;GO:0016491 ;GO:0016491 ;GO:0005488
		Zoff295923	1563	263	204	251	536	935	457	290	201	370	649	373	300	12.94	11.72	12.45	27.19	48.35	22.59	14.27	10.07	18.26	32.82	18.47	15.11	12.37	32.71	14.2	22.1333	gi|695066409|ref|XP_009380096.1|	PREDICTED: isoflavone 2'-hydroxylase-like [Musa acuminata subsp. malaccensis]	vvi:100267741	hypothetical protein LOC100267741	At5g67310	[Q] KOG0156 Cytochrome P450 CYP2 subfamily	sp|Q6WNQ8|C81E8_MEDTR	Cytochrome P450 81E8 OS=Medicago truncatula GN=CYP81E8 PE=2 SV=1	GO:0016491 ;GO:0005488 ;GO:0046872 ;GO:0016491 ;GO:0020037 ;GO:0016705 ;GO:0004497 ;GO:0005506 ;GO:0055114
	C4H	Zoff110346	720	269.12	187.93	424.03	163.13	131.4	143.38	244.98	295.77	305.73	514.03	193.6	262.05	13.25	10.79	21.04	8.28	6.8	7.09	12.06	14.82	15.09	25.99	9.59	13.2	15.0267	7.39	13.99	16.26	gi|672181252|ref|XP_008810838.1|	PREDICTED: trans-cinnamate 4-monooxygenase-like [Phoenix dactylifera]	pop:POPTR_823837	C4H2, CYP73A42; cytochrome P450 cinnamate 4-hydroxylase (EC:1.14.13.11); K00487 trans-cinnamate 4-monooxygenase [EC:1.14.13.11]	At2g30490	[Q] KOG0156 Cytochrome P450 CYP2 subfamily	sp|Q04468|TCMO_HELTU	Trans-cinnamate 4-monooxygenase OS=Helianthus tuberosus GN=CYP73A1 PE=1 SV=1	GO:0020037 ;GO:0016710 ;GO:0005506 ;GO:0055114
		Zoff148158	669	54.43	46	318.31	592.13	126	817.71	30	132.44	51	409.38	34.4	125	2.68	2.64	15.79	30.04	6.52	40.43	1.48	6.64	2.52	20.7	1.7	6.29	7.03667	25.6633	3.54667	9.56333	gi|327387359|gb|AEA72281.1|	cinnamate 4-hydroxylase [Angelica gigas]	rcu:RCOM_1164350	cinnamate 4-hydroxylase, putative (EC:1.14.13.11); K00487 trans-cinnamate 4-monooxygenase [EC:1.14.13.11]	At2g30490	[Q] KOG0156 Cytochrome P450 CYP2 subfamily	sp|O81928|TCMO_CICAR	Trans-cinnamate 4-monooxygenase OS=Cicer arietinum GN=CYP73A19 PE=2 SV=2	GO:0020037 ;GO:0016710 ;GO:0005506 ;GO:0055114
		Zoff153101	1712	1272.88	1423.07	2434.97	1201.87	737.6	986.62	1418.02	1644.23	1642.27	2844.97	937.4	1417.95	62.65	81.74	120.82	60.97	38.14	48.78	69.78	82.38	81.07	143.87	46.43	71.41	88.4033	49.2967	77.7433	87.2367	gi|695044564|ref|XP_009410039.1|	PREDICTED: trans-cinnamate 4-monooxygenase-like [Musa acuminata subsp. malaccensis]	pop:POPTR_823837	C4H2, CYP73A42; cytochrome P450 cinnamate 4-hydroxylase (EC:1.14.13.11); K00487 trans-cinnamate 4-monooxygenase [EC:1.14.13.11]	At2g30490	[Q] KOG0156 Cytochrome P450 CYP2 subfamily	sp|Q43054|TCMO_POPKI	Trans-cinnamate 4-monooxygenase OS=Populus kitakamiensis GN=CYP73A16 PE=2 SV=1	GO:0020037 ;GO:0016710 ;GO:0005506 ;GO:0055114
		Zoff172464	1360	170.57	107	974.69	1731.87	316	2442.29	145	394.56	184	1346.62	117.6	386	8.4	6.15	48.36	87.85	16.34	120.74	7.14	19.77	9.08	68.1	5.82	19.44	20.97	74.9767	11.9967	31.12	gi|695056222|ref|XP_009416323.1|	PREDICTED: trans-cinnamate 4-monooxygenase-like [Musa acuminata subsp. malaccensis]	pop:POPTR_823837	C4H2, CYP73A42; cytochrome P450 cinnamate 4-hydroxylase (EC:1.14.13.11); K00487 trans-cinnamate 4-monooxygenase [EC:1.14.13.11]	At2g30490	[Q] KOG0156 Cytochrome P450 CYP2 subfamily	sp|Q42797|TCMO_SOYBN	Trans-cinnamate 4-monooxygenase OS=Glycine max GN=CYP73A11 PE=2 SV=1	GO:0020037 ;GO:0016710 ;GO:0005506 ;GO:0055114
		Zoff190360	1986	3816	2762	5921	6685	4303	6476	4435	5119	5165.99	10088	2313	3434	187.81	158.65	293.78	339.12	222.52	320.16	218.25	256.49	255	510.14	114.56	172.93	213.413	293.933	243.247	265.877	gi|695044564|ref|XP_009410039.1|	PREDICTED: trans-cinnamate 4-monooxygenase-like [Musa acuminata subsp. malaccensis]	pop:POPTR_823837	C4H2, CYP73A42; cytochrome P450 cinnamate 4-hydroxylase (EC:1.14.13.11); K00487 trans-cinnamate 4-monooxygenase [EC:1.14.13.11]	At2g30490	[Q] KOG0156 Cytochrome P450 CYP2 subfamily	sp|Q42797|TCMO_SOYBN	Trans-cinnamate 4-monooxygenase OS=Glycine max GN=CYP73A11 PE=2 SV=1	GO:0020037 ;GO:0016705 ;GO:0004497 ;GO:0005506 ;GO:0055114
		Zoff262691	1247	108	99	237.06	4717	1278.08	6980.54	174.3	350.73	222.03	5666.51	271	667.51	5.32	5.69	11.76	239.28	66.09	345.1	8.58	17.57	10.96	286.55	13.42	33.62	7.59	216.823	12.37	111.197	gi|570932606|gb|AHF20176.1|	cinnamate 4-hydroxylase, partial [Musa acuminata AAA Group]	sbi:SORBI_04g017460	hypothetical protein; K00487 trans-cinnamate 4-monooxygenase [EC:1.14.13.11]	At2g30490	[Q] KOG0156 Cytochrome P450 CYP2 subfamily	sp|H2DH22|C7A10_PANGI	Cytochrome P450 CYP73A100 OS=Panax ginseng PE=2 SV=1	GO:0016023 ;GO:0004497 ;GO:0005506 ;GO:0020037 ;GO:0016705 ;GO:0055114 ;GO:0020037 ;GO:0016705 ;GO:0004497 ;GO:0005506 ;GO:0055114 ;GO:0016023 ;GO:0004497 ;GO:0005506 ;GO:0020037 ;GO:0016705 ;GO:0055114 ;GO:0016023 ;GO:0004497 ;GO:0005506 ;GO:0020037 ;GO:0016705 ;GO:0055114
		Zoff020741	347	6	2	3	70.49	6.6	77.69	3	5	4	26	1	8.44	0.3	0.11	0.15	3.58	0.34	3.84	0.15	0.25	0.2	1.31	0.05	0.43	0.186667	2.58667	0.2	0.596667	gi|695080662|ref|XP_009387808.1|	PREDICTED: trans-cinnamate 4-monooxygenase-like [Musa acuminata subsp. malaccensis]	sbi:SORBI_04g017460	hypothetical protein; K00487 trans-cinnamate 4-monooxygenase [EC:1.14.13.11]	At2g30490	[Q] KOG0156 Cytochrome P450 CYP2 subfamily	sp|H2DH22|C7A10_PANGI	Cytochrome P450 CYP73A100 OS=Panax ginseng PE=2 SV=1	GO:0016023 ;GO:0004497 ;GO:0005506 ;GO:0020037 ;GO:0016705 ;GO:0055114
		Zoff020742	347	4	0	0	72.51	4.4	106.31	5	5	2	54	4	10.56	0.2	0	0	3.68	0.23	5.26	0.25	0.25	0.1	2.73	0.2	0.53	0.0666667	3.05667	0.2	1.15333	gi|695080662|ref|XP_009387808.1|	PREDICTED: trans-cinnamate 4-monooxygenase-like [Musa acuminata subsp. malaccensis]	sbi:SORBI_04g017460	hypothetical protein; K00487 trans-cinnamate 4-monooxygenase [EC:1.14.13.11]	At2g30490	[Q] KOG0156 Cytochrome P450 CYP2 subfamily	sp|H2DH22|C7A10_PANGI	Cytochrome P450 CYP73A100 OS=Panax ginseng PE=2 SV=1	GO:0016023 ;GO:0004497 ;GO:0005506 ;GO:0020037 ;GO:0016705 ;GO:0055114
		Zoff262685	563	46	39.04	88	1129.79	470.37	2396.15	65	111	68	2040.2	131	254	2.26	2.24	4.37	57.31	24.32	118.46	3.2	5.56	3.36	103.17	6.49	12.79	2.95667	66.6967	4.04	40.8167	gi|695008971|ref|XP_009391094.1|	PREDICTED: cytochrome P450 CYP73A100-like [Musa acuminata subsp. malaccensis]	osa:4329329	Os02g0467600; K00487 trans-cinnamate 4-monooxygenase [EC:1.14.13.11]	At2g30490	[Q] KOG0156 Cytochrome P450 CYP2 subfamily	sp|H2DH22|C7A10_PANGI	Cytochrome P450 CYP73A100 OS=Panax ginseng PE=2 SV=1	GO:0016023 ;GO:0004497 ;GO:0005506 ;GO:0020037 ;GO:0016705 ;GO:0016020 ;GO:0055114
		Zoff262686	563	0	1.96	0	29.21	5.7	61.2	0	0	0	80.8	0	0	0	0.11	0	1.48	0.29	3.03	0	0	0	4.09	0	0	0.0366667	1.6	0	1.36333	gi|695008971|ref|XP_009391094.1|	PREDICTED: cytochrome P450 CYP73A100-like [Musa acuminata subsp. malaccensis]	osa:4329329	Os02g0467600; K00487 trans-cinnamate 4-monooxygenase [EC:1.14.13.11]	At2g30490	[Q] KOG0156 Cytochrome P450 CYP2 subfamily	sp|H2DH22|C7A10_PANGI	Cytochrome P450 CYP73A100 OS=Panax ginseng PE=2 SV=1	GO:0016023 ;GO:0004497 ;GO:0005506 ;GO:0020037 ;GO:0016705 ;GO:0016020 ;GO:0055114
		Zoff262690	474	18	10	35.94	454	125.92	725.46	18.7	40.27	31.97	671.49	39	83.49	0.89	0.57	1.78	23.03	6.51	35.87	0.92	2.02	1.58	33.96	1.93	4.2	1.08	21.8033	1.50667	13.3633	gi|695058403|ref|XP_009417516.1|	PREDICTED: cytochrome P450 CYP73A100-like [Musa acuminata subsp. malaccensis]	osa:4329324	Os02g0467000; K00487 trans-cinnamate 4-monooxygenase [EC:1.14.13.11]	At2g30490	[Q] KOG0156 Cytochrome P450 CYP2 subfamily	sp|H2DH22|C7A10_PANGI	Cytochrome P450 CYP73A100 OS=Panax ginseng PE=2 SV=1	GO:0016023 ;GO:0004497 ;GO:0005506 ;GO:0020037 ;GO:0016705 ;GO:0055114
	CYP93A1	Zoff231190	2284	282	204	368	482	561	546	266	208	312	472	363	310	13.88	11.72	18.26	24.45	29.01	26.99	13.09	10.42	15.4	23.87	17.98	15.61	14.62	26.8167	12.97	19.1533	gi|695054613|ref|XP_009415441.1|	PREDICTED: cytochrome P450 93A3-like [Musa acuminata subsp. malaccensis]	pop:POPTR_89386	CYP93A4; cytochrome P450	At5g06900	[Q] KOG0156 Cytochrome P450 CYP2 subfamily	sp|Q42798|C93A1_SOYBN	3,9-dihydroxypterocarpan 6A-monooxygenase OS=Glycine max GN=CYP93A1 PE=1 SV=1	GO:0046872 ;GO:0016491 ;GO:0046872 ;GO:0016491 ;GO:0046872 ;GO:0016491	CYP93A1
		Zoff231191	815	20	10	19	8	9	2	18	6	8	11	42	17	0.98	0.57	0.94	0.41	0.47	0.1	0.89	0.3	0.39	0.56	2.08	0.86	0.83	0.326667	0.526667	1.16667	gi|695054613|ref|XP_009415441.1|	PREDICTED: cytochrome P450 93A3-like [Musa acuminata subsp. malaccensis]	pop:POPTR_89386	CYP93A4; cytochrome P450	At5g06900	[Q] KOG0156 Cytochrome P450 CYP2 subfamily	sp|Q42798|C93A1_SOYBN	3,9-dihydroxypterocarpan 6A-monooxygenase OS=Glycine max GN=CYP93A1 PE=1 SV=1	GO:0016491 ;GO:0005488	CYP93A1
Jasmonates	AOS	Zoff169783	1834	1812	1130	1184	619	1316	723	259	1098	363	615	827	823	89.18	64.91	58.75	31.4	68.05	35.74	12.75	55.01	17.92	31.1	40.96	41.45	70.9467	45.0633	28.56	37.8367	gi|695033822|ref|XP_009404395.1|	PREDICTED: allene oxide synthase, chloroplastic [Musa acuminata subsp. malaccensis]	rcu:RCOM_1016730	cytochrome P450, putative (EC:4.2.1.92); K10528 hydroperoxide lyase [EC:4.1.2.-]	7302303	[Q] KOG0158 Cytochrome P450 CYP3/CYP5/CYP6/CYP9 subfamilies	sp|P48417|CP74_LINUS	Allene oxide synthase, chloroplastic OS=Linum usitatissimum GN=CYP74A PE=1 SV=1	GO:0044238 ;GO:0016829 ;GO:0032787 ;GO:0046872 ;GO:0016491 ;GO:0042430 ;GO:0044238 ;GO:0016829 ;GO:0032787 ;GO:0046872 ;GO:0016491 ;GO:0042430
		Zoff172291	746	20	47	42	34	44	51	73	79	78	32	53	67	0.98	2.7	2.08	1.72	2.28	2.52	3.59	3.96	3.85	1.62	2.62	3.37	1.92	2.17333	3.8	2.53667	gi|695049172|ref|XP_009412514.1|	PREDICTED: allene oxide synthase 1, chloroplastic-like [Musa acuminata subsp. malaccensis]	pop:POPTR_644172	CYP74A1; cytochrome P450 allene oxide synthase (EC:4.2.1.92); K01723 hydroperoxide dehydratase [EC:4.2.1.92]	--	--	sp|P48417|CP74_LINUS	Allene oxide synthase, chloroplastic OS=Linum usitatissimum GN=CYP74A PE=1 SV=1	GO:0044272 ;GO:0006633 ;GO:0031407 ;GO:0016705 ;GO:1901362 ;GO:0005506 ;GO:1901135 ;GO:0047987 ;GO:0009753 ;GO:0009072 ;GO:0019438 ;GO:0033559 ;GO:0009694 ;GO:0006796 ;GO:0071229 ;GO:0019222 ;GO:0020037 ;GO:0019637 ;GO:0031347 ;GO:0007165 ;GO:0045087 ;GO:1901606 ;GO:0009534 ;GO:0055114 ;GO:0019748 ;GO:0071310 ;GO:0006732 ;GO:0004497 ;GO:0042430 ;GO:1901701 ;GO:1901566 ;GO:0016020 ;GO:0098542
		Zoff172292	1556	27	34	147	36	49	50	34	27	52	21	30	124	1.33	1.95	7.29	1.83	2.53	2.47	1.67	1.35	2.57	1.06	1.49	6.24	3.52333	2.27667	1.86333	2.93	gi|695005006|ref|XP_009388934.1|	PREDICTED: allene oxide synthase 1, chloroplastic-like [Musa acuminata subsp. malaccensis]	pop:POPTR_644172	CYP74A1; cytochrome P450 allene oxide synthase (EC:4.2.1.92); K01723 hydroperoxide dehydratase [EC:4.2.1.92]	Hs4758104	[Q] KOG0684 Cytochrome P450	sp|P48417|CP74_LINUS	Allene oxide synthase, chloroplastic OS=Linum usitatissimum GN=CYP74A PE=1 SV=1	GO:0009108 ;GO:0008652 ;GO:0009695 ;GO:0009697 ;GO:0016705 ;GO:0005506 ;GO:0010363 ;GO:0019761 ;GO:0010200 ;GO:0009684 ;GO:0047987 ;GO:0031348 ;GO:0050832 ;GO:0031408 ;GO:0019373 ;GO:0020037 ;GO:0009867 ;GO:0019288 ;GO:0009941 ;GO:0009595 ;GO:0042742 ;GO:0009416 ;GO:0006612 ;GO:0006569 ;GO:0009117 ;GO:0006636 ;GO:0010310 ;GO:0010287 ;GO:0005739 ;GO:0055114 ;GO:0009862 ;GO:0006766 ;GO:0009055 ;GO:…
		Zoff204672	2046	3089	3775	6209	1522	934	1387	3686	5974	3290	2215	5373	4806	152.03	216.83	308.07	77.21	48.3	68.57	181.39	299.33	162.4	112.01	266.11	242.03	225.643	64.6933	214.373	206.717	gi|695005006|ref|XP_009388934.1|	PREDICTED: allene oxide synthase 1, chloroplastic-like [Musa acuminata subsp. malaccensis]	pop:POPTR_644172	CYP74A1; cytochrome P450 allene oxide synthase (EC:4.2.1.92); K01723 hydroperoxide dehydratase [EC:4.2.1.92]	--	--	sp|P48417|CP74_LINUS	Allene oxide synthase, chloroplastic OS=Linum usitatissimum GN=CYP74A PE=1 SV=1	GO:0009108 ;GO:0008652 ;GO:0009695 ;GO:0009697 ;GO:0016705 ;GO:0005506 ;GO:0010363 ;GO:0019761 ;GO:0010200 ;GO:0009684 ;GO:0047987 ;GO:0031348 ;GO:0050832 ;GO:0031408 ;GO:0019373 ;GO:0020037 ;GO:0009867 ;GO:0019288 ;GO:0009941 ;GO:0009595 ;GO:0042742 ;GO:0009416 ;GO:0006612 ;GO:0006569 ;GO:0009117 ;GO:0006636 ;GO:0010310 ;GO:0010287 ;GO:0005739 ;GO:0055114 ;GO:0009862 ;GO:0006766 ;GO:0009055 ;GO:…
		Zoff300345	880	5622.18	3805.55	4115.25	2024.56	1249.97	1643.56	1805.25	3759.05	2439.5	2754.14	3300.58	4735.18	276.71	218.59	204.19	102.7	64.64	81.25	88.84	188.35	120.42	139.27	163.47	238.46	233.163	82.8633	132.537	180.4	gi|695012499|ref|XP_009393009.1|	PREDICTED: allene oxide synthase 2-like [Musa acuminata subsp. malaccensis]	sbi:SORBI_01g042270	hypothetical protein	7303501	[Q] KOG0158 Cytochrome P450 CYP3/CYP5/CYP6/CYP9 subfamilies	sp|Q96242|CP74A_ARATH	Allene oxide synthase, chloroplastic OS=Arabidopsis thaliana GN=CYP74A PE=1 SV=3	GO:0020037 ;GO:0016705 ;GO:0005506 ;GO:0055114 ;GO:0020037 ;GO:0016705 ;GO:0005506 ;GO:0055114 ;GO:0047987 ;GO:0020037 ;GO:0016705 ;GO:0004497 ;GO:0005506 ;GO:0055114 ;GO:0047987 ;GO:0020037 ;GO:0016705 ;GO:0004497 ;GO:0005506 ;GO:0055114 ;GO:0020037 ;GO:0016705 ;GO:0005506 ;GO:0055114 ;GO:0009108 ;GO:0008652 ;GO:0009695 ;GO:0009697 ;GO:0016705 ;GO:0005506 ;GO:0010363 ;GO:0019761 ;GO:0010200 ;GO:…
		Zoff300346	386	83.16	105.45	197.06	2.44	3.03	1.13	53.75	194.73	90.5	59.86	108.12	120.47	4.09	6.06	9.78	0.12	0.16	0.06	2.65	9.76	4.47	3.03	5.35	6.07	6.64333	0.113333	5.62667	4.81667	gi|695048782|ref|XP_009412306.1|	PREDICTED: allene oxide synthase 2-like [Musa acuminata subsp. malaccensis]	sbi:SORBI_01g042270	hypothetical protein	7303501	[Q] KOG0158 Cytochrome P450 CYP3/CYP5/CYP6/CYP9 subfamilies	sp|Q96242|CP74A_ARATH	Allene oxide synthase, chloroplastic OS=Arabidopsis thaliana GN=CYP74A PE=1 SV=3	GO:0009108 ;GO:0008652 ;GO:0009695 ;GO:0009697 ;GO:0016705 ;GO:0005506 ;GO:0010363 ;GO:0019761 ;GO:0010200 ;GO:0009684 ;GO:0047987 ;GO:0031348 ;GO:0050832 ;GO:0031408 ;GO:0019373 ;GO:0020037 ;GO:0009867 ;GO:0019288 ;GO:0009941 ;GO:0009595 ;GO:0042742 ;GO:0009416 ;GO:0006612 ;GO:0006569 ;GO:0009117 ;GO:0006636 ;GO:0010310 ;GO:0010287 ;GO:0005739 ;GO:0055114 ;GO:0009862 ;GO:0006766 ;GO:0006733 ;GO:…
		Zoff318212	2207	2550	1849	2771	3775	4721	3992	2773	1313	2738	4054	2653	3388	125.5	106.2	137.49	191.5	244.14	197.36	136.46	65.79	135.15	205.01	131.4	170.62	123.063	211	112.467	169.01	gi|695049172|ref|XP_009412514.1|	PREDICTED: allene oxide synthase 1, chloroplastic-like [Musa acuminata subsp. malaccensis]	sbi:SORBI_01g007000	hypothetical protein; K01723 hydroperoxide dehydratase [EC:4.2.1.92]	At1g74110	[Q] KOG0156 Cytochrome P450 CYP2 subfamily	sp|Q7Y0C8|C74A1_ORYSJ	Allene oxide synthase 1, chloroplastic OS=Oryza sativa subsp. japonica GN=CYP74A1 PE=2 SV=1	GO:0009987 ;GO:0005739 ;GO:0016757 ;GO:0016020 ;GO:0005794 ;GO:0009108 ;GO:0008652 ;GO:0009695 ;GO:0009697 ;GO:0016705 ;GO:0005506 ;GO:0010363 ;GO:0019761 ;GO:0010200 ;GO:0009684 ;GO:0047987 ;GO:0031348 ;GO:0050832 ;GO:0031408 ;GO:0019373 ;GO:0020037 ;GO:0009867 ;GO:0019288 ;GO:0009941 ;GO:0009595 ;GO:0042742 ;GO:0009416 ;GO:0006612 ;GO:0006569 ;GO:0009117 ;GO:0006636 ;GO:0010310 ;GO:0010287 ;GO:…
Gibberellin	KO	Zoff211809	1860	996	923	838	1015	4252	1000	1505	1114	1268	801	2446	1412	49.02	53.02	41.58	51.49	219.88	49.44	74.06	55.82	62.59	40.51	121.14	71.11	47.8733	106.937	64.1567	77.5867	gi|672118667|ref|XP_008782548.1|	PREDICTED: ent-kaurene oxidase, chloroplastic-like [Phoenix dactylifera]	rcu:RCOM_1592560	ent-kaurene oxidase, putative (EC:1.14.13.78); K04122 ent-kaurene oxidase [EC:1.14.13.78]	At5g25900	[Q] KOG0156 Cytochrome P450 CYP2 subfamily	sp|Q5Z5R4|C7016_ORYSJ	Ent-kaurene oxidase 2 OS=Oryza sativa subsp. japonica GN=CYP701A6 PE=1 SV=1	GO:0016021 ;GO:0052615 ;GO:0052616 ;GO:0009055 ;GO:0020037 ;GO:0009686 ;GO:0009740 ;GO:0009707 ;GO:0005506 ;GO:0005783 ;GO:0010241 ;GO:0052617
		Zoff077671	326	0	0	1	0	0	0	0	0	0	0	0	0	0	0	0.05	0	0	0	0	0	0	0	0	0	0.0166667	0	0	0	gi|630036324|ref|XP_007839344.1|	hypothetical protein PFICI_12572 [Pestalotiopsis fici W106-1]	mgr:MG10351.4	hypothetical protein	Hs4503211	[Q] KOG0159 Cytochrome P450 CYP11/CYP12/CYP24/CYP27 subfamilies	sp|O94142|KO1_GIBFU	Ent-kaurene oxidase OS=Gibberella fujikuroi GN=CYP503A1 PE=1 SV=1	GO:0046872 ;GO:0016491
		Zoff082682	1626	0	0	0	0	0	0	0	0	0	43	0	0	0	0	0	0	0	0	0	0	0	2.17	0	0	0	0	0	0.723333	gi|302881649|ref|XP_003039735.1|	hypothetical protein NECHADRAFT_50293 [Nectria haematococca mpVI 77-13-4]	fgr:FG09195.1	hypothetical protein	At5g09970	[Q] KOG0156 Cytochrome P450 CYP2 subfamily	sp|O94142|KO1_GIBFU	Ent-kaurene oxidase OS=Gibberella fujikuroi GN=CYP503A1 PE=1 SV=1	GO:0020037 ;GO:0016705 ;GO:0004497 ;GO:0005506 ;GO:0055114
		Zoff377499	1688	1	0	0	0	0	0	1	0	1	45	0	0	0.05	0	0	0	0	0	0.05	0	0.05	2.28	0	0	0.0166667	0	0.0333333	0.76	gi|587709279|gb|EWZ80616.1|	hypothetical protein FOWG_15328 [Fusarium oxysporum f. sp. lycopersici MN25]	fgr:FG11282.1	hypothetical protein	At4g37340	[Q] KOG0156 Cytochrome P450 CYP2 subfamily	sp|Q701P2|KO1_GIBIN	Ent-kaurene oxidase OS=Gibberella intermedia GN=CYP503A1 PE=1 SV=1	GO:0020037 ;GO:0016705 ;GO:0004497 ;GO:0005506 ;GO:0055114
		Zoff451480	615	0	0	0	0	0	0	0	0	0	5	0	0	0	0	0	0	0	0	0	0	0	0.25	0	0	0	0	0	0.0833333	gi|627821103|ref|XP_007683391.1|	hypothetical protein COCMIDRAFT_22399 [Bipolaris oryzae ATCC 44560]	pno:SNOG_07696	hypothetical protein	Hs16933533	[Q] KOG0158 Cytochrome P450 CYP3/CYP5/CYP6/CYP9 subfamilies	sp|O94142|KO1_GIBFU	Ent-kaurene oxidase OS=Gibberella fujikuroi GN=CYP503A1 PE=1 SV=1	GO:0046872 ;GO:0016491
		Zoff156147	2139	12	1	111.74	0	1	1.07	0	0	0	2	0	23	0.59	0.06	5.54	0	0.05	0.05	0	0	0	0.1	0	1.16	2.06333	0.0333333	0	0.42	gi|628339020|ref|XP_007746855.1|	hypothetical protein A1O5_08080 [Cladophialophora psammophila CBS 110553]	fgr:FG11282.1	hypothetical protein	At5g45340	[QI] KOG0157 Cytochrome P450 CYP4/CYP19/CYP26 subfamilies	sp|Q701P2|KO1_GIBIN	Ent-kaurene oxidase OS=Gibberella intermedia GN=CYP503A1 PE=1 SV=1	GO:0016491 ;GO:0005488 ;GO:0046872 ;GO:0016491
		Zoff604056	564	2	0	0	0	6	3	0	0	0	0	0	0	0.1	0	0	0	0.31	0.15	0	0	0	0	0	0	0.0333333	0.153333	0	0	gi|628227021|ref|XP_007721385.1|	hypothetical protein A1O1_02284 [Capronia coronata CBS 617.96]	act:ACLA_061240	cytochrome P450	CE16784	[Q] KOG0156 Cytochrome P450 CYP2 subfamily	sp|Q701P2|KO1_GIBIN	Ent-kaurene oxidase OS=Gibberella intermedia GN=CYP503A1 PE=1 SV=1	GO:0016491 ;GO:0005488
		Zoff339530	779	0	0	6.64	0	0	0	0	0	0	0	0	1	0	0	0.33	0	0	0	0	0	0	0	0	0.05	0.11	0	0	0.0166667	gi|189211678|ref|XP_001942168.1|	cytochrome P450 [Pyrenophora tritici-repentis Pt-1C-BFP]	afv:AFLA_101730	ferulate-5-hydroxylase, putative	At5g09970	[Q] KOG0156 Cytochrome P450 CYP2 subfamily	sp|Q701P2|KO1_GIBIN	Ent-kaurene oxidase OS=Gibberella intermedia GN=CYP503A1 PE=1 SV=1	--
		Zoff339531	430	0	0	1.36	0	0	0	0	0	0	0	0	2	0	0	0.07	0	0	0	0	0	0	0	0	0.1	0.0233333	0	0	0.0333333	gi|238505663|ref|XP_002384045.1|	ferulate-5-hydroxylase, putative [Aspergillus flavus NRRL3357]	afv:AFLA_101730	ferulate-5-hydroxylase, putative	Hs7706129	[Q] KOG0684 Cytochrome P450	sp|Q701P2|KO1_GIBIN	Ent-kaurene oxidase OS=Gibberella intermedia GN=CYP503A1 PE=1 SV=1	--
	KAO	Zoff088292	1079	40	36	30	7	25	15	15	13	26	9	11	8	1.97	2.07	1.49	0.36	1.29	0.74	0.74	0.65	1.28	0.46	0.54	0.4	1.84333	0.796667	0.89	0.466667	gi|695012080|ref|XP_009392783.1|	PREDICTED: ent-kaurenoic acid oxidase 1-like [Musa acuminata subsp. malaccensis]	rcu:RCOM_0659440	Ent-kaurenoic acid oxidase, putative (EC:1.14.13.79); K04123 ent-kaurenoic acid hydroxylase [EC:1.14.13.79]	At1g05160	[QI] KOG0157 Cytochrome P450 CYP4/CYP19/CYP26 subfamilies	sp|O23051|KAO1_ARATH	Ent-kaurenoic acid oxidase 1 OS=Arabidopsis thaliana GN=KAO1 PE=2 SV=1	GO:0016021 ;GO:0055114 ;GO:0051777 ;GO:0009055 ;GO:0020037 ;GO:0009686 ;GO:0005789 ;GO:0005506 ;GO:0020037 ;GO:0016705 ;GO:0004497 ;GO:0005506 ;GO:0055114
		Zoff225669	1987	303	247	194	27	490	34	328	610	378	204	289	372	14.91	14.19	9.63	1.37	25.34	1.68	16.14	30.56	18.66	10.32	14.31	18.73	12.91	9.46333	21.7867	14.4533	gi|695012080|ref|XP_009392783.1|	PREDICTED: ent-kaurenoic acid oxidase 1-like [Musa acuminata subsp. malaccensis]	osa:4339885	Os06g0110000; K04123 ent-kaurenoic acid hydroxylase [EC:1.14.13.79]	At1g05160	[QI] KOG0157 Cytochrome P450 CYP4/CYP19/CYP26 subfamilies	sp|Q9AXH9|KAO1_HORVU	Ent-kaurenoic acid oxidase 1 OS=Hordeum vulgare GN=KAO1 PE=1 SV=1	GO:0016023 ;GO:0004497 ;GO:0005506 ;GO:0009685 ;GO:0020037 ;GO:0016705 ;GO:0055114 ;GO:0016021 ;GO:0055114 ;GO:0016705 ;GO:0004497 ;GO:0016023 ;GO:0020037 ;GO:0009686 ;GO:0005789 ;GO:0005506 ;GO:0016021 ;GO:0055114 ;GO:0016705 ;GO:0004497 ;GO:0016023 ;GO:0020037 ;GO:0009686 ;GO:0005789 ;GO:0005506 ;GO:0016023 ;GO:0004497 ;GO:0005506 ;GO:0009685 ;GO:0020037 ;GO:0016705 ;GO:0055114
		Zoff243745	1467	45	28	42	60	44	48	47	50	45	39	67	37	2.21	1.61	2.08	3.04	2.28	2.37	2.31	2.51	2.22	1.97	3.32	1.86	1.96667	2.56333	2.34667	2.38333	gi|672130439|ref|XP_008788752.1|	PREDICTED: ent-kaurenoic acid oxidase 1-like, partial [Phoenix dactylifera]	sbi:SORBI_10g000920	hypothetical protein; K04123 ent-kaurenoic acid hydroxylase [EC:1.14.13.79]	At1g05160	[QI] KOG0157 Cytochrome P450 CYP4/CYP19/CYP26 subfamilies	sp|Q9AXH9|KAO1_HORVU	Ent-kaurenoic acid oxidase 1 OS=Hordeum vulgare GN=KAO1 PE=1 SV=1	GO:0016021 ;GO:0055114 ;GO:0016705 ;GO:0004497 ;GO:0020037 ;GO:0009686 ;GO:0005789 ;GO:0005506 ;GO:0016021 ;GO:0055114 ;GO:0016705 ;GO:0004497 ;GO:0020037 ;GO:0009686 ;GO:0005789 ;GO:0005506 ;GO:0016021 ;GO:0055114 ;GO:0016705 ;GO:0004497 ;GO:0020037 ;GO:0009686 ;GO:0005789 ;GO:0005506
Gingerol		Zoff020741	347	6	2	3	70.49	6.6	77.69	3	5	4	26	1	8.44	0.3	0.11	0.15	3.58	0.34	3.84	0.15	0.25	0.2	1.31	0.05	0.43	0.186667	2.58667	0.2	0.596667	gi|695080662|ref|XP_009387808.1|	PREDICTED: trans-cinnamate 4-monooxygenase-like [Musa acuminata subsp. malaccensis]	sbi:SORBI_04g017460	hypothetical protein; K00487 trans-cinnamate 4-monooxygenase [EC:1.14.13.11]	At2g30490	[Q] KOG0156 Cytochrome P450 CYP2 subfamily	sp|H2DH22|C7A10_PANGI	Cytochrome P450 CYP73A100 OS=Panax ginseng PE=2 SV=1	GO:0016023 ;GO:0004497 ;GO:0005506 ;GO:0020037 ;GO:0016705 ;GO:0055114
		Zoff020742	347	4	0	0	72.51	4.4	106.31	5	5	2	54	4	10.56	0.2	0	0	3.68	0.23	5.26	0.25	0.25	0.1	2.73	0.2	0.53	0.0666667	3.05667	0.2	1.15333	gi|695080662|ref|XP_009387808.1|	PREDICTED: trans-cinnamate 4-monooxygenase-like [Musa acuminata subsp. malaccensis]	sbi:SORBI_04g017460	hypothetical protein; K00487 trans-cinnamate 4-monooxygenase [EC:1.14.13.11]	At2g30490	[Q] KOG0156 Cytochrome P450 CYP2 subfamily	sp|H2DH22|C7A10_PANGI	Cytochrome P450 CYP73A100 OS=Panax ginseng PE=2 SV=1	GO:0016023 ;GO:0004497 ;GO:0005506 ;GO:0020037 ;GO:0016705 ;GO:0055114
		Zoff022787	456	0	0	0	0	0	0	0	0	0	0	0	2	0	0	0	0	0	0	0	0	0	0	0	0.1	0	0	0	0.0333333	gi|695051829|ref|XP_009413956.1|	PREDICTED: cytochrome P450 98A2 [Musa acuminata subsp. malaccensis]	osa:4339188	Os05g0494000; K09754 p-coumarate 3-hydroxylase [EC:1.14.13.-]	--	--	sp|O48956|C98A1_SORBI	Cytochrome P450 98A1 OS=Sorghum bicolor GN=CYP98A1 PE=2 SV=1	--
		Zoff148158	669	54.43	46	318.31	592.13	126	817.71	30	132.44	51	409.38	34.4	125	2.68	2.64	15.79	30.04	6.52	40.43	1.48	6.64	2.52	20.7	1.7	6.29	7.03667	25.6633	3.54667	9.56333	gi|327387359|gb|AEA72281.1|	cinnamate 4-hydroxylase [Angelica gigas]	rcu:RCOM_1164350	cinnamate 4-hydroxylase, putative (EC:1.14.13.11); K00487 trans-cinnamate 4-monooxygenase [EC:1.14.13.11]	At2g30490	[Q] KOG0156 Cytochrome P450 CYP2 subfamily	sp|O81928|TCMO_CICAR	Trans-cinnamate 4-monooxygenase OS=Cicer arietinum GN=CYP73A19 PE=2 SV=2	GO:0020037 ;GO:0016710 ;GO:0005506 ;GO:0055114
		Zoff151318	951	363	397	411	573	550	443	705	642	841	631	404	482	17.87	22.8	20.39	29.07	28.44	21.9	34.69	32.17	41.51	31.91	20.01	24.27	20.3533	26.47	36.1233	25.3967	gi|695051829|ref|XP_009413956.1|	PREDICTED: cytochrome P450 98A2 [Musa acuminata subsp. malaccensis]	ath:AT2G40890	CYP98A3 (cytochrome P450, family 98, subfamily A, polypeptide 3); monooxygenase/ p-coumarate 3-hydroxylase; K09754 p-coumarate 3-hydroxylase [EC:1.14.13.-]	At2g40890	[Q] KOG0156 Cytochrome P450 CYP2 subfamily	sp|O48922|C98A2_SOYBN	Cytochrome P450 98A2 OS=Glycine max GN=CYP98A2 PE=2 SV=1	GO:0020037 ;GO:0016021 ;GO:0016705 ;GO:0004497 ;GO:0005506 ;GO:0055114
		Zoff198837	1843	488	178	37	51	156	108	107	562	90	40	49	56	24.02	10.22	1.84	2.59	8.07	5.34	5.27	28.16	4.44	2.02	2.43	2.82	12.0267	5.33333	12.6233	2.42333	gi|672203744|ref|XP_008778727.1|	PREDICTED: cytochrome P450 71A1-like [Phoenix dactylifera]	ath:AT3G26300	CYP71B34; electron carrier/ heme binding / iron ion binding / monooxygenase/ oxygen binding; K00517 [EC:1.14.-.-]	At3g26300	[Q] KOG0156 Cytochrome P450 CYP2 subfamily	sp|Q9LIP6|C71BV_ARATH	Cytochrome P450 71B34 OS=Arabidopsis thaliana GN=CYP71B34 PE=2 SV=1	GO:0005488 ;GO:0016491 ;GO:0005488
		Zoff224886	1935	1818	773	1444	15	58	25	881	2109	401	810	300	254	89.48	44.4	71.65	0.76	3	1.24	43.36	105.67	19.79	40.96	14.86	12.79	68.51	1.66667	56.2733	22.87	gi|695042434|ref|XP_009408870.1|	PREDICTED: cytochrome P450 711A1-like [Musa acuminata subsp. malaccensis]	osa:4341325	Os06g0565100; K00517 [EC:1.14.-.-]	At2g26170	[Q] KOG0158 Cytochrome P450 CYP3/CYP5/CYP6/CYP9 subfamilies	sp|B9DFU2|MAX1_ARATH	Cytochrome P450 711A1 OS=Arabidopsis thaliana GN=CYP711A1 PE=2 SV=1	GO:0044763 ;GO:0016491 ;GO:0046872 ;GO:0044710 ;GO:0065007 ;GO:0009653 ;GO:0048731 ;GO:0044763 ;GO:0016020 ;GO:0016491 ;GO:1901576 ;GO:0046872 ;GO:0044711 ;GO:0044765 ;GO:0050789 ;GO:0006950 ;GO:0044249
		Zoff236083	2793	117	84	183	118	90	115	72	125	61	99	121	112	5.76	4.82	9.08	5.99	4.65	5.69	3.54	6.26	3.01	5.01	5.99	5.64	6.55333	5.44333	4.27	5.54667	gi|695011886|ref|XP_009392677.1|	PREDICTED: cytochrome P450 77A2-like [Musa acuminata subsp. malaccensis]	zma:100193602	hypothetical protein LOC100193602	At5g04660	[Q] KOG0156 Cytochrome P450 CYP2 subfamily	sp|O48928|C77A3_SOYBN	Cytochrome P450 77A3 OS=Glycine max GN=CYP77A3 PE=2 SV=1	GO:0016023 ;GO:0004497 ;GO:0005506 ;GO:0020037 ;GO:0016705 ;GO:0055114 ;GO:0010075 ;GO:0042545 ;GO:0009664 ;GO:0031225 ;GO:0048653
		Zoff262685	563	46	39.04	88	1129.79	470.37	2396.15	65	111	68	2040.2	131	254	2.26	2.24	4.37	57.31	24.32	118.46	3.2	5.56	3.36	103.17	6.49	12.79	2.95667	66.6967	4.04	40.8167	gi|695008971|ref|XP_009391094.1|	PREDICTED: cytochrome P450 CYP73A100-like [Musa acuminata subsp. malaccensis]	osa:4329329	Os02g0467600; K00487 trans-cinnamate 4-monooxygenase [EC:1.14.13.11]	At2g30490	[Q] KOG0156 Cytochrome P450 CYP2 subfamily	sp|H2DH22|C7A10_PANGI	Cytochrome P450 CYP73A100 OS=Panax ginseng PE=2 SV=1	GO:0016023 ;GO:0004497 ;GO:0005506 ;GO:0020037 ;GO:0016705 ;GO:0016020 ;GO:0055114
		Zoff262686	563	0	1.96	0	29.21	5.7	61.2	0	0	0	80.8	0	0	0	0.11	0	1.48	0.29	3.03	0	0	0	4.09	0	0	0.0366667	1.6	0	1.36333	gi|695008971|ref|XP_009391094.1|	PREDICTED: cytochrome P450 CYP73A100-like [Musa acuminata subsp. malaccensis]	osa:4329329	Os02g0467600; K00487 trans-cinnamate 4-monooxygenase [EC:1.14.13.11]	At2g30490	[Q] KOG0156 Cytochrome P450 CYP2 subfamily	sp|H2DH22|C7A10_PANGI	Cytochrome P450 CYP73A100 OS=Panax ginseng PE=2 SV=1	GO:0016023 ;GO:0004497 ;GO:0005506 ;GO:0020037 ;GO:0016705 ;GO:0016020 ;GO:0055114
		Zoff262690	474	18	10	35.94	454	125.92	725.46	18.7	40.27	31.97	671.49	39	83.49	0.89	0.57	1.78	23.03	6.51	35.87	0.92	2.02	1.58	33.96	1.93	4.2	1.08	21.8033	1.50667	13.3633	gi|695058403|ref|XP_009417516.1|	PREDICTED: cytochrome P450 CYP73A100-like [Musa acuminata subsp. malaccensis]	osa:4329324	Os02g0467000; K00487 trans-cinnamate 4-monooxygenase [EC:1.14.13.11]	At2g30490	[Q] KOG0156 Cytochrome P450 CYP2 subfamily	sp|H2DH22|C7A10_PANGI	Cytochrome P450 CYP73A100 OS=Panax ginseng PE=2 SV=1	GO:0016023 ;GO:0004497 ;GO:0005506 ;GO:0020037 ;GO:0016705 ;GO:0055114
		Zoff262691	1247	108	99	237.06	4717	1278.08	6980.54	174.3	350.73	222.03	5666.51	271	667.51	5.32	5.69	11.76	239.28	66.09	345.1	8.58	17.57	10.96	286.55	13.42	33.62	7.59	216.823	12.37	111.197	gi|570932606|gb|AHF20176.1|	cinnamate 4-hydroxylase, partial [Musa acuminata AAA Group]	sbi:SORBI_04g017460	hypothetical protein; K00487 trans-cinnamate 4-monooxygenase [EC:1.14.13.11]	At2g30490	[Q] KOG0156 Cytochrome P450 CYP2 subfamily	sp|H2DH22|C7A10_PANGI	Cytochrome P450 CYP73A100 OS=Panax ginseng PE=2 SV=1	GO:0016023 ;GO:0004497 ;GO:0005506 ;GO:0020037 ;GO:0016705 ;GO:0055114 ;GO:0020037 ;GO:0016705 ;GO:0004497 ;GO:0005506 ;GO:0055114 ;GO:0016023 ;GO:0004497 ;GO:0005506 ;GO:0020037 ;GO:0016705 ;GO:0055114 ;GO:0016023 ;GO:0004497 ;GO:0005506 ;GO:0020037 ;GO:0016705 ;GO:0055114
		Zoff605147	440	1	4	1	2	2	5	4	7	2	2	6	5	0.05	0.23	0.05	0.1	0.1	0.25	0.2	0.35	0.1	0.1	0.3	0.25	0.11	0.15	0.216667	0.216667	gi|695012012|ref|XP_009392746.1|	PREDICTED: cytochrome P450 71A3-like [Musa acuminata subsp. malaccensis]	ath:AT4G13310	CYP71A20; electron carrier/ heme binding / iron ion binding / monooxygenase/ oxygen binding; K00517 [EC:1.14.-.-]	At4g13310	[Q] KOG0156 Cytochrome P450 CYP2 subfamily	sp|Q9T0K2|C71AK_ARATH	Cytochrome P450 71A20 OS=Arabidopsis thaliana GN=CYP71A20 PE=2 SV=2	GO:0046872 ;GO:0016491
